# Supplementary material for: Affinity peptide ligands: new tools for chasing non-canonical N-phosphoproteome
Source: Royal Society of Chemistry journal article supplement (doi:10.1039/d5sc01557j), 2025-01-01
Supplement: d5sc01557j1.xlsx [file d5sc01557j1.xlsx]

## Sheet: Info
Dataset S1: The N-phosphorylation sites identified by MB@P1 based enrichment strategy in E.coli, HeLa cells and cell nuclei.
Filtered sites: sites with localization probability ≥ 0.75, score ≥ 40, score difference ≥ 5.

## Sheet: E.coli-all sites
Proteins	Positions within proteins	Localization prob	Score diff	Score	Amino acid	Sequence window	Phosphorylation(HKR) Probabilities
A8DYQ1	20	1	41.5102	41.51	K	FIFDNLIILAVPFMIKTSLKTNLIFFFLCVF	NFIFDNLIILAVPFMIK(1)TSLK(1)
C1P5Z8	5	0.860184	8.45882	68.626	K	___________MKENKVQQISHKLINIVVFV	MK(0.123)ENK(0.86)VQQISHK(0.017)
P02413	13	0.500385	0	44.426	K	___MRLNTLSPAEGSKKAGKRLGRGIGSGLG	R(0.999)LNTLSPAEGSK(0.5)K(0.5)
P04994	443	0.968679	15.2076	46.578	K	MLTTRLEDGWIESEVKNIQPVKKSRKKVH__	AGEMLTTR(0.002)LEDGWIESEVK(0.969)NIQPVK(0.029)
P04995	216	0.999704	35.6901	49.632	K	QPRLFDYLFTHRNKHKLMALIDVPQMKPLVH	H(1)K(1)LMALIDVPQMK
P04995	214	0.698062	0.629213	43.813	K	TRQPRLFDYLFTHRNKHKLMALIDVPQMKPL	NK(0.698)H(0.651)K(0.651)LMALIDVPQMK(1)
P06960	42	0.999963	44.3531	74.46	K	AAQLKADKKNGKEVQKLTGKNIALIFEKDST	EVQK(1)LTGK(1)NIALIFEK
P06960	46	0.999904	40.1858	74.46	K	KADKKNGKEVQKLTGKNIALIFEKDSTRTRC	EVQK(1)LTGK(1)NIALIFEK
P07004	10	0.999762	36.2412	49.929	K	______MLEQMGIAAKQASYKLAQLSSREKN	LEQMGIAAK(1)QASYK(1)LAQLSSR
P08331	158	1	44.2941	44.294	K	IDARTKQPMFTPYLIKDTEVVDKDGKKQTLK	QPMFTPYLIK(1)DTEVVDK(1)
P08400	265	0.999818	39.8434	48.389	K	TQRMEGLVKQLLTLSKIEAAPTHLLNEKVDV	QLLTLSK(1)IEAAPTH(0.993)LLNEK(0.993)VDVPMMLR(0.014)
P08400	277	0.99291	23.9302	48.389	K	TLSKIEAAPTHLLNEKVDVPMMLRVVEREAQ	QLLTLSK(1)IEAAPTH(0.993)LLNEK(0.993)VDVPMMLR(0.014)
P08622	308	0.903132	9.54091	66.351	K	VPGETQTGKLFRMRGKGVKSVRGGAQGDLLC	MR(0.968)GK(0.903)GVK(0.128)
P0A6F1	285	0.579654	1.47224	58.071	K	LGHQLLALASGAKTVKMKFGHHGGNHPVKDV	TVK(0.58)MK(0.415)FGH(0.499)H(0.501)GGNH(0.005)PVK(0.001)
P0A6F5	207	0.792891	8.66697	56.416	K	GMQFDRGYLSPYFINKPETGAVELESPFILL	GYLSPYFINK(0.793)PETGAVELESPFILLADK(0.108)K(0.099)
P0A6M8	430	0.999999	61.4919	81.771	K	VISIAVEPKTKADQEKMGLALGRLAKEDPSF	ADQEK(1)MGLALGRLAK
P0A712	4	1	40.3775	58.274	K	____________MQIKRSIEKIPGGMMLVPL	MQIK(1)R(1)SIEK(1)
P0A7U7	5	0.999184	29.9303	46.844	K	___________MANIKSAKKRAIQSEKARKH	MANIK(0.999)SAK(0.197)K(0.804)
P0A832	8	0.999988	49.2838	65.224	K	________MTKKKAHKPGSATIALNKRARHE	AH(1)K(1)PGSATIALNK
P0A877	199	1	40.9939	40.994	K	GAENRAALPLNHLVAKLKEYNAAPPLQGFGI	AALPLNH(1)LVAK(1)LK(1)
P0A884	48	0.774243	5.35237	43.798	K	QMRFNLQDGFPLVTTKRCHLRSIIHELLWFL	FNLQDGFPLVTTK(0.774)R(0.226)
P0A8B5	4	0.998191	27.8116	40.154	K	____________MFGKGGLGNLMKQAQQMQE	MFGK(0.998)GGLGNLMK(0.002)
P0A8G9	3	1	68.9002	91.265	K	_____________MPKKNEAPASFEKALSEL	MPK(1)K(1)NEAPASFEK
P0A8G9	4	1	69.3788	91.265	K	____________MPKKNEAPASFEKALSELE	MPK(1)K(1)NEAPASFEK
P0A8V2	279	0.999452	32.6084	48.372	K	EKGRRITARHIRQLEKDDVKLIEVPVEYIAG	QLEK(0.999)DDVK(1)LIEVPVEYIAGK(0.001)
P0A8V2	283	0.999559	33.5552	48.372	K	RITARHIRQLEKDDVKLIEVPVEYIAGKVVA	QLEK(0.999)DDVK(1)LIEVPVEYIAGK(0.001)
P0A930	264	0.9998	36.9858	64.757	K	VPRNDDLKVFVMGEVKKQSTLKMDFSGMTLT	VFVMGEVK(1)K
P0A9F1	11	0.499945	0	63.212	K	_____MSRRAGTPTAKKVTQLVNVEEHVEGF	AGTPTAK(0.5)K(0.5)VTQLVNVEEH(0.884)VEGFR(0.116)
P0A9F1	12	0.499945	0	63.212	K	____MSRRAGTPTAKKVTQLVNVEEHVEGFR	AGTPTAK(0.5)K(0.5)VTQLVNVEEH(0.884)VEGFR(0.116)
P0A9J0	370	0.921094	11.219	65.565	K	DHRRRVLHSLEQALSKDRVKTSVNGFSALGL	VLH(1)SLEQALSK(0.921)DR(0.07)VK(0.009)
P0A9T6	50	0.999999	60.222	86.136	K	HVHRNSVSALINNNRKLTTEMAFRLAKVFDT	K(1)LTTEMAFR(1)LAK
P0A9Y6	15	0.974543	15.83	58.693	K	_MAKIKGQVKWFNESKGFGFITPADGSKDVF	WFNESK(0.975)GFGFITPADGSK(0.025)
P0A9Z1	2	1	62.4662	62.466	K	______________MKKIDAIIKPFKLDDVR	MK(1)K(1)IDAIIK(1)
P0A9Z1	3	1	62.4662	62.466	K	_____________MKKIDAIIKPFKLDDVRE	MK(1)K(1)IDAIIK(1)
P0ABA6	10	0.969775	14.6354	68.171	K	______MAGAKEIRSKIASVQNTQKITKAME	SK(0.97)IASVQNTQK(0.909)ITK(0.121)
P0ABA6	19	0.909054	9.8512	68.171	K	AKEIRSKIASVQNTQKITKAMEMVAASKMRK	SK(0.97)IASVQNTQK(0.909)ITK(0.121)
P0ABZ6	134	1	43.5122	43.512	K	AYDGLNYNTYRNQIRKEMIISEVRNNEVRRR	K(1)EMIISEVR(1)
P0AC33	15	0.928007	11.2206	50.806	K	_MSNKPFHYQAPFPLKKDDTEYYLLTSEHVS	MSNK(0.002)PFHYQAPFPLK(0.928)K(0.07)
P0ACE3	4	0.904273	9.74844	54.066	K	____________MSEKPLTKTDYLMRLRRCQ	SEK(0.904)PLTK(0.097)TDYLMR(0.999)
P0ACX5	6	1	46.955	46.955	K	__________MGNRTKEDELYREMCRVVGKV	GNR(1)TK(1)EDELYR(1)
P0AD61	145	1	101.664	101.66	K	IGMEVTAIEGNKVICKVLNNGDLGENKGVNL	VICK(1)VLNNGDLGENK(1)
P0AD68	342	0.835152	5.33117	41.988	K	SVLNTIPYRINGHEIKDVARYSELTLTGVLQ	ENSVLNTIPYR(0.045)INGH(0.502)EIK(0.835)DVAR(0.617)
P0ADK8	89	0.998819	28.65	70.907	K	RAITKKEQADMGKLKKSVRGLVVVHPMTALG	K(0.999)SVR(0.135)GLVVVH(0.866)PMTALGR(1)
P0AE08	7	0.908709	9.97998	44.753	K	_________MSLINTKIKPFKNQAFKNGEFI	MSLINTK(0.909)IK(0.091)
P0AEC3	758	0.902491	9.66428	72.028	K	LPAWEDNVGEWIEEMKEEWRHDVEVLKAWVA	HLQQLGQQIQSPDLPAWEDNVGEWIEEMK(0.902)EEWR(0.098)
P0AEP1	453	0.939977	14.6911	51.276	K	ETKHVSLEHIERNLMKGRKLREIGAHD____	HVSLEH(0.852)IER(0.174)NLMK(0.94)GR(0.033)
P0AEP7	3	0.499682	0	55.721	K	_____________MAKMRAVDAAMYVLEKEG	MAK(0.5)MR(0.5)AVDAAMYVLEK(0.001)
P0AEU0	84	0.577384	1.50197	75.387	K	FVENPLDALIPSLKAKKIDAIMSSLSITEKR	AK(0.577)K(0.409)IDAIMSSLSITEK(0.014)
P0AEV1	108	1	48.5269	48.527	K	DIAKALRLGVEDVLLKPVKDLNRLREMVFAC	ALR(1)LGVEDVLLK(1)PVK(1)
P0AEZ3	175	0.994727	22.757	52.693	K	LASKSRRAENGEEPIKEHLLLTRYNPGRVSR	RAENGEEPIK(0.995)EH(0.974)LLLTR(0.031)
P0AF06	2	1	43.0844	43.084	K	______________MKNQAHPIIVVKRRKAK	MK(1)NQAH(1)PIIVVK(1)
P0AF93	3	1	45.187	45.187	K	_____________MSKTIATENAPAAIGPYV	MSK(1)TIATENAPAAIGPYVQGVDLGNMIITSGQIPVNPK(1)
P0AFN6	10	0.809446	6.29129	41.383	K	______MMHLYWVALKSIWAKEIHRFMRIWV	MHLYWVALK(0.809)SIWAK(0.19)
P0AFP4	12	0.957401	12.2733	47.622	K	____MTHKATEILTGKVMQKSVLITGCSSGI	TH(0.56)K(0.434)ATEILTGK(0.957)VMQK(0.049)
P0AG00	210	0.962345	13.8627	62.464	K	KGAWAARTIQMKAQVKRQEEVAKAIYDRRMN	TIQMK(0.084)AQVK(0.962)R(0.954)
P0AG24	285	0.997935	26.7754	68.224	K	SDTCYRVLGQMHSLYKPRPGRVKDYIAIPKA	VLGQMH(0.017)SLYK(0.998)PR(0.985)
P0AG27	36	1	53.6827	53.683	K	LLVAVLVTTFKSLTSKVKVITRGEATRLINK	SLTSK(1)VK(1)VITR(1)
P0AG27	38	1	53.6827	53.683	K	VAVLVTTFKSLTSKVKVITRGEATRLINKED	SLTSK(1)VK(1)VITR(1)
P0AG78	252	0.999981	46.8111	65.224	K	LAEPTVSVVDKVVEKKGTKEVAEAYLKYLYS	K(1)GTK(0.086)EVAEAYLK(0.914)
P0AGG2	6	1	46.9854	46.985	K	__________MSQALKNLLTLLNLEKIEEGL	SQALK(1)NLLTLLNLEK(1)
P0AGK4	6	0.925246	11.867	74.165	K	__________MNLSTKQKQHLKGLAHPLKPV	MNLSTK(0.925)QK(0.85)QH(0.065)LK(0.16)
P0AGK4	8	0.849562	9.00776	74.165	K	________MNLSTKQKQHLKGLAHPLKPVVL	MNLSTK(0.925)QK(0.85)QH(0.065)LK(0.16)
P0C8K0	2	0.901102	8.50704	72.731	K	______________MKHLTEMVRQHKAGKTN	MK(0.901)H(0.796)LTEMVR(0.099)QH(0.099)K(0.106)
P0CF60	40	0.999625	34.468	59.796	K	AVPPSKRAHTGRVAVKESNQRWCSDGFEFCC	AHTGRVAVK(1)ESNQR(1)
P0DUW4	13	0.751459	5.10819	43.494	K	___MNLIIILVWHSMKHSKGYVLEAQDDELS	MNLIIILVWH(0.212)SMK(0.751)H(0.456)SK(0.456)GYVLEAQDDELSR(0.125)
P0DUW4	16	0.455956	0	43.494	K	MNLIIILVWHSMKHSKGYVLEAQDDELSR__	MNLIIILVWH(0.212)SMK(0.751)H(0.456)SK(0.456)GYVLEAQDDELSR(0.125)
P10121	405	0.951329	12.8844	54.537	K	KSHLMEELKKIVRVMKKLDVEAPHEVMLTID	IVR(0.994)VMK(0.951)K(0.054)
P10151	313	0.998087	27.1719	49.537	K	DKGHQWMEEQLVSICKR______________	GH(0.999)QWMEEQLVSICK(0.998)R(0.003)
P10408	4	1	65.8071	90.15	K	____________MLIKLLTKVFGSRNDRTLR	MLIK(1)LLTK(0.997)VFGSR(0.003)
P10408	8	0.999982	47.4684	90.15	K	________MLIKLLTKVFGSRNDRTLRRMRK	LIK(1)LLTK(1)VFGSR
P11447	118	0.839831	7.1893	56.766	K	LHTGRSRNDQVATDLKLWCKDTVSELLTANR	NDQVATDLK(0.84)LWCK(0.161)DTVSELLTANR(0.999)
P11553	2	0.999997	55.7065	73.802	K	______________MKQEVILVLDCGATNVR	MK(1)QEVILVLDCGATNVR
P11864	258	1	46.8795	46.88	K	DITEEQLKIMRFAIIKSIPRATLTDKLENEL	IMR(1)FAIIK(1)SIPR(1)
P11875	553	1	42.8179	42.818	K	PILSAENEEVRNSRLKLAQLTAKTLKLGLDT	NSR(1)LK(1)LAQLTAK(1)
P13458	440	0.868667	8.19842	45.879	K	RQHLVALHGQIVPQQKRLAQLQVAIQNVTQE	PLR(1)QH(1)LVALH(0.999)GQIVPQQK(0.869)R(0.133)
P13669	4	0.986125	21.5272	50.039	K	____________MGHKPLYRQIADRIREQIA	MGH(0.007)K(0.986)PLYR(0.007)
P14294	537	1	66.073	66.073	K	LGTEATRAGIIELLFKRGFLTKKGRYIHSTD	AGIIELLFK(1)R(1)
P15032	4	0.999492	32.3557	53.013	K	____________MSTKPLFLLRKAKKSSGEP	MSTK(0.999)PLFLLR(0.875)K(0.125)
P15373	16	0.866828	8.12917	54.288	K	MPANARSHAVLTTESKVTIRGQTTIPAPVRE	MPANAR(1)SH(0.999)AVLTTESK(0.867)VTIR(0.134)
P16431	545	0.840152	7.17082	63.184	K	PCYSCTDRMTVVDVRKKKSKVVPYKELERYS	MTVVDVR(0.993)K(0.84)K(0.167)
P17888	395	0.991849	20.761	46.319	K	RAGNARPAIQHVLDLKGQKVQAGLAPALITR	AGNAR(0.988)PAIQH(0.029)VLDLK(0.992)GQK(0.991)
P17993	183	0.999972	48.4208	68.657	K	LMAVVGAEYILRMVPKGTHDVKKFIKPAELL	MVPK(1)GTH(1)DVKK
P19642	480	0.999998	57.7339	77.124	K	IVSLDNCITRLRLSVKDMSLVNVQALKDNRA	LSVK(1)DMSLVNVQALKDNR
P19769	208	0.998674	31.3762	65.246	K	YRMRRYQNILKEHGIKQSMSRKGNCLDNAVV	EH(1)GIK(0.999)QSMSR(0.001)K(0.001)
P22525	308	1	56.4282	56.428	K	TAETKPMDKQTTSRSKPAPAVRAAYDNELVE	SK(1)PAPAVR(1)AAYDNELVEAVK(1)
P23830	9	0.663917	0	42.843	K	_______MLSKFKRNKHQQHLAQLPKISQSV	R(0.66)NK(0.664)H(0.66)QQH(0.037)LAQLPK(0.979)
P23847	302	0.739368	4.52832	77.318	K	MPGLNVGYLSYNVQKKPLDDVKVRQALTYAV	K(0.739)PLDDVK(0.261)
P23862	2	0.99648	24.5152	48.198	K	______________MKTALLLEKLEGQLATL	K(0.996)TALLLEK(0.999)LEGQLATLR(0.004)
P23862	9	0.999049	30.2001	48.198	K	_______MKTALLLEKLEGQLATLRQRCAPV	K(0.996)TALLLEK(0.999)LEGQLATLR(0.004)
P25516	453	0.999986	46.0927	65.224	K	TSNPSVLMAAGLLAKKAVTLGLKRQPWVKAS	K(1)AVTLGLK(0.42)R(0.58)
P25741	5	0.99994	42.2867	72.705	K	___________MVELKEPLATLWRGKDAFAE	VELK(1)EPLATLWRGK
P29018	3	0.487391	0	40.686	K	_____________MNKSRQKELTRWLKQQSV	MNK(0.487)SR(0.487)QK(0.025)
P31060	392	1	47.1889	47.189	K	QQKLVQQWLDILGIDKRTADAPFHSLSWGQQ	LVQQWLDILGIDK(1)R(1)
P31600	53	0.999885	39.3703	42.976	K	GLSDYRHFVIYPRLDKALKAQKNNDEATAIR	H(0.001)FVIYPR(0.999)LDK(1)ALK(1)
P31678	92	0.992991	21.9347	45.618	K	PLAGVHGAERRDINGKTHIVHLPDAIARDIS	R(0.008)DINGK(0.993)TH(0.994)IVH(0.994)LPDAIAR(0.011)
P31801	9	0.849734	11.0561	56.414	K	_______MSNAQEAVKTRHKETSLIFPVLAL	MSNAQEAVK(0.85)TR(0.067)H(0.067)K(0.017)
P33228	113	0.994346	22.4527	68.515	K	AYLLPFGNKNEKSGKKNVQLIIGYRGMIDLA	K(0.994)NVQLIIGYR(0.006)GMIDLAR
P33369	270	0.92409	9.98314	51.971	K	KIIEARLSALTNNQTKSLKLKPVALPKVASQ	LSALTNNQTK(0.924)SLK(0.832)LK(0.244)
P33369	273	0.832071	6.53489	51.971	K	EARLSALTNNQTKSLKLKPVALPKVASQLPD	LSALTNNQTK(0.924)SLK(0.832)LK(0.244)
P33667	343	0.49928	0	87.568	K	LLEEYYDPMYRYQLEKKAEKVVFRGEWAEVA	YQLEK(0.499)K(0.499)AEK(0.001)
P33667	344	0.49928	0	87.568	K	LEEYYDPMYRYQLEKKAEKVVFRGEWAEVAE	YQLEK(0.499)K(0.499)AEK(0.001)
P36879	11	1	77.5333	77.533	K	_____MTIALELQQLKKTYPGGVQALRGIDL	TIALELQQLK(1)K(1)
P36938	133	0.875154	8.64295	139.02	K	TPTPAVSNAILVHNKKGGPLADGIVITPSHN	K(0.875)GGPLADGIVITPSH(0.005)NPPEDGGIK(0.12)
P37014	181	0.989511	20.6654	60.246	K	EIMQHRRIALLELIQKHIRDRDLIGMVDRIT	IALLELIQK(0.99)H(0.951)IR(0.047)DR(0.012)
P37016	7	0.499588	0	57.96	K	_________MHPTQRKLMKRIILFLSLLFCI	MH(0.001)PTQR(0.5)K(0.5)LMK(1)
P37147	111	0.946442	14.3441	44.367	K	GLLLLLPPVQKHLTVKLMPHLRFSRMPGGGF	H(0.002)LTVK(0.946)LMPH(0.043)LR(0.067)FSR(0.942)
P37615	48	0.896203	9.3622	64.803	K	NDMAPLQQKLVVVSNKREKPINDRRSRQQEV	LVVVSNK(0.896)R(0.104)
P37629	330	0.734542	5.58691	81.239	K	YILTLLNSMRNMEGNKDSRINKNVVVLAGNH	NMEGNK(0.735)DSR(0.203)INK(0.063)
P37639	176	1	43.3824	43.382	K	LARIASELLMSPSLLKKKLREEETSYSQLLT	IASELLMSPSLLK(1)K(1)K(1)
P37639	177	1	43.3824	43.382	K	ARIASELLMSPSLLKKKLREEETSYSQLLTE	IASELLMSPSLLK(1)K(1)K(1)
P37653	137	0.999462	30.6461	52.966	K	ELPERVSHKTQHLDEKKELGHLSAGARRLIL	VSH(0.531)K(0.126)TQH(0.344)LDEK(0.999)K(1)
P39208	16	1	81.2776	81.278	K	MAGESFILMGVSGSGKTLIGSKVAALLSAKF	AGESFILMGVSGSGK(1)TLIGSK(1)
P39212	85	0.999813	37.2717	43.512	K	LRKKLQRIEMENEILKRLL____________	LQR(0.001)IEMENEILK(1)R(1)
P39414	131	1	46.1286	46.129	K	YEKTGLGRRIALILVKKMGHRTLFLGYAVMF	IALILVK(1)K(1)MGH(1)R(1)
P39414	132	1	46.1286	46.129	K	EKTGLGRRIALILVKKMGHRTLFLGYAVMFS	IALILVK(1)K(1)MGH(1)R(1)
P40711	32	0.999892	41.5521	71.888	K	ITAIRAQGAGGQHVNKTSTAIHLRFDIRASS	AQGAGGQHVNK(1)TSTAIH(0.996)LR(0.004)
P42619	2	0.999869	38.8317	44.612	K	______________MKKLEDVGVLVARILMP	K(1)K(1)LEDVGVLVAR
P42619	3	0.999873	38.9521	44.612	K	_____________MKKLEDVGVLVARILMPI	K(1)K(1)LEDVGVLVAR
P42632	111	0.898155	9.45412	53.089	K	QPLEKIVGLQTDAPLKRALHPFGGINMIKSS	IVGLQTDAPLK(0.898)R(0.102)
P46889	1132	0.924067	11.0899	58.01	K	VVLVDEFADLMMTVGKKVEELIARLAQKARA	EPYIVVLVDEFADLMMTVGK(0.924)K(0.076)
P52106	197	0.95011	11.8562	41.429	K	ISENTVKTHLYNLFKKIAVKNRTQAVSWAND	K(0.95)IAVK(0.235)NR(0.815)
P52106	31	0.509724	0	64.104	K	ITKSSLQATALLQHLKQSLAITGKLHNIQRS	SSLQATALLQH(0.51)LK(0.51)QSLAITGK(0.981)
P52613	133	0.999993	51.4559	52.716	K	QSTAALLAENRLDQKKMDEFAQRAAMRKPE_	K(1)MDEFAQR
P60566	2	0.999965	44.5473	49.442	K	______________MKIITCYKCVPDEQDIA	MK(1)IITCYK
P60716	3	0.982657	17.7833	46.001	K	_____________MSKPIVMERGVKYRDADK	MSK(0.983)PIVMER(0.017)
P61175	27	0.525904	0	40.987	K	SSAQKVRLVADLIRGKKVSQALDILTYTNKK	LVADLIR(0.948)GK(0.526)K(0.526)
P62399	3	0.978001	16.6327	59.884	K	_____________MAKLHDYYKDEVVKKLMT	AK(0.978)LH(0.021)DYYK(0.001)DEVVK
P62517	3	1	47.6029	47.603	K	_____________MNKTTEYIDAMPIAASEK	MNK(1)TTEYIDAMPIAASEK(1)AALPK(1)
P62517	18	1	47.6029	47.603	K	KTTEYIDAMPIAASEKAALPKTDIRAVHQAL	MNK(1)TTEYIDAMPIAASEK(1)AALPK(1)
P63224	177	0.996943	27.8383	65.895	K	VPHFGYADRIQEIHIKVIHILIQLIEKEMVK	IQEIH(0.999)IK(0.997)VIH(0.999)ILIQLIEK(0.002)EMVK(0.002)
P64490	72	0.989232	18.5295	56.527	K	GWNPGFTEKMVGWAKKMETGERSVIKNPEYF	K(0.989)METGER(0.232)SVIK(0.778)
P64631	2	0.999964	44.4609	52.579	K	______________MKKIGVAGLQREQIKKT	K(1)K(1)IGVAGLQR
P64631	3	0.999942	42.3659	52.579	K	_____________MKKIGVAGLQREQIKKTI	K(1)K(1)IGVAGLQR
P65807	3	0.879249	8.5445	51.949	K	_____________MAKNIPFKLILEKAKDYQ	MAK(0.879)NIPFK(0.984)LILEK(0.136)
P65807	8	0.984407	17.4341	51.949	K	________MAKNIPFKLILEKAKDYQADMTR	MAK(0.879)NIPFK(0.984)LILEK(0.136)
P67910	34	1	69.8152	69.815	K	LNDKGITDILVVDNLKDGTKFVNLVDLNIAD	GITDILVVDNLK(1)DGTK(1)
P69428	37	0.539824	0.693289	64.52	K	TKKLGSIGSDLGASIKGFKKAMSDDEPKQDK	LGSIGSDLGASIK(0.54)GFK(0.46)
P71243	86	0.849135	4.48188	41.257	K	KLRHRASQTLRGIHRKNTWQALNLKRYGAES	GIH(0.577)R(0.577)K(0.849)NTWQALNLK(0.998)
P71297	61	0.995739	23.547	87.754	K	GTYSALRKSVACAKLKILHLKQRMQNATNFL	LK(0.996)ILH(0.969)LK(0.036)
P75683	221	0.999842	37.7204	62.258	K	YTFEVQPGSSVAKDLKLLLGNSQWRIMCAFK	DLK(1)LLLGNSQWR(0.935)IMCAFK(0.065)
P75800	695	1	62.4662	62.466	K	VRISIDDFGTGLSNLKRFYEINPDSIKVDSQ	ISIDDFGTGLSNLK(1)R(1)
P75817	153	0.999944	42.4908	50.04	K	LRFVLRSDTKLAQLRKALPWLHEQLPQLKVI	K(1)ALPWLH(0.996)EQLPQLK(0.004)
P75919	305	0.999788	36.7296	68.033	K	VPTRAGVAQLLRMVRKGVKIAILTNSLAAND	MVR(1)K(1)GVK
P76055	112	0.999722	35.5651	48.852	K	GVEYKIVEENTYGIVKEKIPEGKTTCSLCSR	LGVEYKIVEENTYGIVK(1)EK(1)
P76055	9	0.90376	9.72698	56.721	K	_______MQENQQITKKEQYNLNKLQKRLRR	QENQQITK(0.904)K(0.096)
P76066	9	0.997546	26.4886	42.123	K	_______METVFDALKAMGKATSIELAARLD	METVFDALK(0.998)AMGK(0.988)ATSIELAAR(0.014)
P76066	13	0.98842	19.4743	42.123	K	___METVFDALKAMGKATSIELAARLDISRE	METVFDALK(0.998)AMGK(0.988)ATSIELAAR(0.014)
P76104	458	0.999311	31.6142	48.188	K	QFDEANNAEKAMNNLKDGLAKLGQTLYYARD	AMNNLK(0.999)DGLAK(0.001)
P76180	88	1	40.8441	40.844	K	LWLTIAFFKRRRCVPKHYIIWLLISVLLAVK	R(1)CVPK(1)H(1)YIIWLLISVLLAVK(1)
P76245	205	0.333312	0	50.04	K	ENLTTLFSLARHLNHKIMIAFIDLDNFKLIN	H(0.333)LNH(0.333)K(0.333)IMIAFIDLDNFK
P76316	54	1	59.4259	59.426	K	RDDVTPMAMGGNKLRKLEFLAADALREGADT	LR(1)K(1)LEFLAADALR(1)
P76393	481	0.996204	26.6689	58.604	K	VGGLEGFIAKRTMLEKMKDEILGLPEEEKRA	R(0.002)TMLEK(0.996)MK(0.002)
P76406	80	1	47.9714	47.971	K	IVKNDATHFCVTQGKKMQIVELKTEGVGLHG	K(1)MQIVELK(1)
P76440	339	0.567663	1.38053	42.831	K	FKHVRLSGELTMAADKIILAVGQHARLDAFA	H(0.5)VR(0.5)LSGELTMAADK(0.568)IILAVGQH(0.413)AR(0.019)
P76481	474	0.756861	4.95076	48.602	K	ASIDKLRYAPDNKLAKSDKTKELAWLKIRWK	YAPDNK(0.242)LAK(0.757)SDK(0.001)
P76577	7	0.98992	19.8608	50.473	K	_________MPRLLTKRGCWITLAAAPFLLF	PR(0.024)LLTK(0.99)R(0.986)
P77172	2	1	75.8112	88.948	K	______________MKLNATYIKIRDKWWGL	MK(1)LNATYIK(0.92)IR(0.08)
P77172	9	0.920109	10.6134	88.948	K	_______MKLNATYIKIRDKWWGLPLFLPSL	MK(1)LNATYIK(0.92)IR(0.08)
P77280	312	0.999941	42.263	46.481	K	YPVTIEAISSGRFDVKSMVTHIYDYRDVQQA	FDVK(1)SMVTH(0.993)IYDYR(0.007)
P77293	119	1	47.6028	71.692	K	HLIEKWQAGADMVLAKRSDRSTDGRLKRKTA	WQAGADMVLAK(1)R(1)
P77468	2	0.99971	35.3746	40.373	K	______________MKIPTTTDIPQRYTWCL	MK(1)IPTTTDIPQR
P77504	581	0.500469	0	41.432	K	WPPKADEVSMEEGLAKRLNVALGDTVTFMGD	ADEVSMEEGLAK(0.5)R(0.5)LNVALGDTVTFMGDTQEFR(0.999)
P77733	4	0.999993	51.8288	53.08	K	____________MRNKLSFDLQLSARKAAIA	MR(1)NK(1)LSFDLQLSAR
Q46791	7	1	52.7857	52.786	K	_________MGAELVKWVKSHKIDAHIITFV	GAELVK(1)WVK(1)
Q46943	60	0.572875	1.27505	65.809	K	NDQGRANLTIDFMYNKKNKTGTVALSGTWQQ	ANLTIDFMYNK(0.573)K(0.427)
P57998	73	1	66.7992	66.799	H	WLFYAYDRLRKTVVAHVFGERTMATLGRLMS	TVVAH(1)VFGER(1)
P00811	330	0.544613	0.78968	50.088	H	KAITPPTPAVRASWVHKTGATGGFGSYVAFI	AITPPTPAVR(0.001)ASWVH(0.545)K(0.454)
P00956	177	0.732818	4.5146	43.548	H	EANIIRALGKIIGNGHLHKGAKPVHWCVDCR	ALGK(0.01)IIGNGH(0.733)LH(0.492)K(0.24)GAK(0.526)
P00956	179	0.491891	0.865585	43.548	H	NIIRALGKIIGNGHLHKGAKPVHWCVDCRSA	ALGK(0.01)IIGNGH(0.733)LH(0.492)K(0.24)GAK(0.526)
P07813	706	1	44.6921	44.692	H	VDALTENQKALRRDVHKTIAKVTDDIGRRQT	ALR(1)R(1)DVH(1)K(1)
P07913	25	0.870438	8.2726	48.371	H	EEGIWMTDVPVPELGHNDLLIKIRKTAICGT	AEEGIWMTDVPVPELGH(0.87)NDLLIK(0.13)
P08400	272	0.993479	24.2937	48.389	H	VKQLLTLSKIEAAPTHLLNEKVDVPMMLRVV	QLLTLSK(1)IEAAPTH(0.993)LLNEK(0.993)VDVPMMLR(0.014)
P0A6F1	290	0.498511	0	58.071	H	LALASGAKTVKMKFGHHGGNHPVKDVEKNVV	TVK(0.58)MK(0.415)FGH(0.499)H(0.501)GGNH(0.005)PVK(0.001)
P0A6F1	291	0.500864	0	58.071	H	ALASGAKTVKMKFGHHGGNHPVKDVEKNVVM	TVK(0.58)MK(0.415)FGH(0.499)H(0.501)GGNH(0.005)PVK(0.001)
P0A6F3	48	0.892312	11.3105	45.542	H	QREFEQIYPKPGWVEHDPMEIWATQSSTLVE	EFEQIYPK(0.066)PGWVEH(0.892)DPMEIWATQSSTLVEVLAK(0.042)
P0A6J5	379	1	83.7369	89.186	H	VVGRTRFKNLWLNTGHGTLGWTMACGSGQLL	NLWLNTGH(1)GTLGWTMACGSGQLLSDLLSGR
P0A6K3	8	0.999418	33.5745	61.958	H	________MSVLQVLHIPDERLRKVAKPVEE	MSVLQVLH(0.999)IPDERLR
P0A7B1	424	0.999833	37.7782	48.351	H	EANIHWAKRLTEAGVHVIFSAPGLKIHAKLF	LTEAGVH(1)VIFSAPGLK
P0A7I0	279	0.994741	22.7863	49.536	H	HKNKAKALSVLGARIHAAEMAKRQQAEASTR	IH(0.995)AAEMAK(0.005)R
P0A7N1	54	0.933013	11.4544	70.68	H	GVTYPYVTIDVSSKSHPFYTGKLRTVASEGN	SH(0.933)PFYTGK(0.067)LRTVASEGNVAR(0.999)
P0A832	7	0.999994	52.1238	65.224	H	_________MTKKKAHKPGSATIALNKRARH	AH(1)K(1)PGSATIALNK
P0A8M3	267	0.993863	22.0994	81.65	H	DLYHMQEEAPGMVFWHNDGWTIFRELEVFVR	QLDLYHMQEEAPGMVFWH(0.994)NDGWTIFR(0.006)
P0A9F1	22	0.883747	8.8098	63.212	H	TPTAKKVTQLVNVEEHVEGFRQVREAHRREL	AGTPTAK(0.5)K(0.5)VTQLVNVEEH(0.884)VEGFR(0.116)
P0A9J0	362	0.999995	55.6451	65.565	H	DFIDMNNEDHRRRVLHSLEQALSKDRVKTSV	VLH(1)SLEQALSK(0.765)DR(0.035)VK(0.2)
P0A9W3	9	0.643719	0	51.286	H	_______MAQFVYTMHRVGKVVPPKRHILKN	MAQFVYTMH(0.644)R(0.644)VGK(0.713)
P0AA80	14	0.926172	10.9876	82.263	H	__MILDTVDEKKKGVHTRYLILLIIFIVTAV	KKGVH(0.926)TR(0.074)
P0AB71	265	0.997673	26.3221	138.04	H	SKKHNLPHNSLNFVFHGGSGSTAQEIKDSVS	HNLPHNSLNFVFH(0.998)GGSGSTAQEIK(0.002)
P0AD01	230	0.953432	13.1065	78.264	H	GVTGRPVYRYRIQAEHYSLLKQYCQ______	YR(0.999)IQAEH(0.953)YSLLK(0.048)
P0AD61	444	0.993175	21.606	55.011	H	FYRLGKELALQSGLAHKGDVVVMVSGALVPS	LGK(0.012)ELALQSGLAH(0.993)K(0.995)
P0ADK8	98	0.866447	8.11475	70.907	H	DMGKLKKSVRGLVVVHPMTALGREMGLQEMT	K(0.999)SVR(0.135)GLVVVH(0.866)PMTALGR(1)
P0ADU2	15	0.939812	14.3879	53.567	H	_MLTVIAEIRTRPGQHHRQAVLDQFAKIVPT	MLTVIAEIRTRPGQH(0.94)H(0.034)R(0.026)
P0AE14	213	1	54.005	54.005	H	WVPVRLAGVVYALIGHGEKALPAWFASLGDF	LAGVVYALIGH(1)GEK(1)
P0AEI1	6	0.978978	19.1232	64.803	H	__________MTKKLHIKTWGCQMNEYDSSK	TK(0.005)K(0.005)LH(0.979)IK(0.012)
P0AEI6	5	0.99428	22.0409	50.024	H	___________MFKPHVTVACVVHAEGKFLV	PH(0.994)VTVACVVH(0.085)AEGK(0.921)
P0AEK4	209	0.581819	1.43458	46.457	H	TLAASGIKDFRKMLAHCEAVTPIRRTVTIED	K(0.418)MLAH(0.582)CEAVTPIR
P0AEZ3	177	0.973928	15.711	52.693	H	SKSRRAENGEEPIKEHLLLTRYNPGRVSRGD	RAENGEEPIK(0.995)EH(0.974)LLLTR(0.031)
P0AFH2	202	0.998126	27.2641	50.149	H	ASIARITRGSMIEVLHSNFIRTARAKGLPMR	GSMIEVLH(0.998)SNFIR(0.002)
P0AFL6	4	0.873341	8.38992	41.429	H	____________MPIHDKSPRPQEFAAVDLG	MPIH(0.873)DK(0.127)SPR
P0AG30	140	0.436754	1.4752	70.96	H	ENARNKILFENLTPLHANSRLRMERGNGSTE	NKILFENLTPLH(0.437)ANSR(0.311)LR(0.252)
P0AGD3	74	0.994621	22.6696	63.202	H	SSEGGVFNNAAQVWNHTFYWNCLAPNAGGEP	SSEGGVFNNAAQVWNH(0.995)TFYWNCLAPNAGGEPTGK(0.005)
P0C8J6	208	0.999323	31.7915	83.359	H	RLENIRQWVNLPLVLHGASGLSTKDIQQTIK	QWVNLPLVLH(0.999)GASGLSTK(0.001)DIQQTIK
P0C8K0	3	0.7961	8.50704	72.731	H	_____________MKHLTEMVRQHKAGKTNG	MK(0.901)H(0.796)LTEMVR(0.099)QH(0.099)K(0.106)
P0DSG3	7	0.82528	6.74693	42.243	H	_________MHAISLHSLAYRRFARNVSLSM	MHAISLH(0.825)SLAYR(0.175)
P10441	77	0.663768	4.63146	61.679	H	VMGIVEVLGRLRRLLHIRADLTKRFGELKPD	R(1)LLH(0.664)IR(0.108)ADLTK(0.229)
P12994	63	0.999868	38.7921	49.793	H	VTCYDPDAPTGSGWWHWVVVNLPADTRVLPQ	SFVVTCYDPDAPTGSGWWH(1)WVVVNLPADTR
P14081	222	1	40.1769	40.177	H	LWLTGVNKPMRVRALHAQNQPTETANAGQRI	ALH(1)AQNQPTETANAGQR(1)IALNIAGDAEK(1)
P15373	8	0.99888	28.8801	54.288	H	________MPANARSHAVLTTESKVTIRGQT	MPANAR(1)SH(0.999)AVLTTESK(0.867)VTIR(0.134)
P16525	27	0.455505	0	53.981	H	TTFRQMEQELAIFAAHLEQHKLLVARVFSLP	QMEQELAIFAAH(0.456)LEQH(0.456)K(0.089)
P16525	31	0.455505	0	53.981	H	QMEQELAIFAAHLEQHKLLVARVFSLPEVKK	QMEQELAIFAAH(0.456)LEQH(0.456)K(0.089)
P16659	484	0.886993	8.94815	56.036	H	DAIAPFQVAILPMNMHKSFRVQELAEKLYSE	GIVWPDAIAPFQVAILPMNMH(0.887)K(0.113)
P16916	1368	0.624349	2.22201	75.109	H	SAKDAKSTQKAWNCRHSRQSNDKKR______	H(0.624)SR(0.374)QSNDK(0.001)K
P17993	186	0.999985	51.1114	68.657	H	VVGAEYILRMVPKGTHDVKKFIKPAELLGWV	MVPK(1)GTH(1)DVKK
P18133	395	0.962736	14.146	60.118	H	DKAFVRALRKAFDLPHIKKAS__________	KAFDLPH(0.963)IK(0.037)
P19769	205	0.999929	44.6614	65.246	H	GWQYRMRRYQNILKEHGIKQSMSRKGNCLDN	EH(1)GIK(0.999)QSMSR(0.001)K(0.001)
P21693	121	1	40.8015	40.801	H	LCGGQPFGMQRDSLQHAPHIIVATPGRLLDH	DSLQH(1)APH(1)IIVATPGR(1)
P21693	124	1	40.8015	40.801	H	GQPFGMQRDSLQHAPHIIVATPGRLLDHLQK	DSLQH(1)APH(1)IIVATPGR(1)
P23367	191	0.689932	3.52339	58.781	H	RRIALARFDVTINLSHNGKIVRQYRAVPEGG	R(0.968)IALAR(0.032)FDVTINLSH(0.69)NGK(0.31)
P23538	421	0.808182	6.24877	62.799	H	KKASAIVTNRGGRTCHAAIIARELGIPAVVG	GGR(0.192)TCH(0.808)AAIIAR
P23909	74	0.878908	8.61981	41.648	H	GASAGEPIPMAGIPYHAVENYLAKLVNQGES	RGASAGEPIPMAGIPYH(0.879)AVENYLAK(0.121)
P24188	5	0.999512	36.7097	47.971	H	___________MPVLHNRISNDALKAKMLAE	PVLH(1)NR(1)ISNDALK(0.001)AK
P24555	418	0.999987	48.9034	50.632	H	QTEVPGFYAANYRSEHLWIVARDGVEVPVSL	SEH(1)LWIVAR
P25522	165	0.999995	53.0741	56.013	H	GAFSARVNHLVEALTHLRIYVEAAIDFPDEE	VNHLVEALTH(1)LR(1)
P25524	98	0.900558	9.35556	54.471	H	FEGIERWAERKALLTHDDVKQRAWQTLKWQI	K(0.099)ALLTH(0.901)DDVK(0.099)QR(0.902)
P25534	259	0.998394	27.9102	51.727	H	RELQSAFGWRLGKITHAGKRSAYPLALTHAA	LGK(0.007)ITH(0.998)AGK(0.994)
P27249	427	1	94.4764	106.68	H	CNIPEARKLFLSILRHPGAVRRGLLPMHRHS	LFLSILR(1)H(1)PGAVR
P27300	209	0.999375	31.7692	50.392	H	VIVNGGVPRSGEIPMHLLPGQAVNLRTGTRC	SGEIPMH(0.999)LLPGQAVNLR(0.94)TGTR(0.06)
P27848	45	0.49997	0	69.716	H	LLTARGINFVFATGRHHVDVGQIRDNLEIKS	H(0.5)H(0.5)VDVGQIRDNLEIK
P27848	46	0.49997	0	69.716	H	LTARGINFVFATGRHHVDVGQIRDNLEIKSY	H(0.5)H(0.5)VDVGQIRDNLEIK
P30850	508	0.815487	6.45694	78.149	H	ATWTSPIRKYGDMINHRLLKAVIKGETATRP	YGDMINH(0.815)R(0.184)LLK
P31119	36	0.99518	24.1352	47.104	H	DTQALKGERVLITPNHVSFIDGILLGLFLPV	VTGDTQALK(0.054)GER(0.95)VLITPNH(0.995)VSFIDGILLGLFLPVR(0.001)
P31453	72	1	46.3244	46.324	H	RRHGSGTYLVRKDVLHQTASLTGLVEVLKRQ	DVLH(1)QTASLTGLVEVLK(1)
P31572	3	0.99859	28.5024	65.263	H	_____________MDHLPMPKFGPLAGLRVV	DH(0.999)LPMPK(0.001)
P31574	166	1	42.0945	42.095	H	TFDAAQPDASRTGETHTVEWQAPAVAITRTA	TGETH(1)TVEWQAPAVAITR(1)
P31806	368	0.999998	56.2633	58.63	H	DADALNLLAINPDKRHNRVITPHPGEAARLL	R(1)H(1)NR(1)VITPH(1)PGEAAR
P31806	375	0.999675	34.8757	58.63	H	LAINPDKRHNRVITPHPGEAARLLGCSVAEI	R(1)H(1)NR(1)VITPH(1)PGEAAR
P33030	21	0.87777	7.7101	46.92	H	LITGFLGSGKTTSILHLLAHKDPNEKWAVLV	MTRTNLITGFLGSGK(0.003)TTSILH(0.878)LLAH(0.831)K(0.288)
P33030	25	0.831399	6.2943	46.92	H	FLGSGKTTSILHLLAHKDPNEKWAVLVNEFG	MTRTNLITGFLGSGK(0.003)TTSILH(0.878)LLAH(0.831)K(0.288)
P33195	324	0.978009	16.6852	101.6	H	AGNTALRMAMQTREQHIRREKANSNICTSQV	EQH(0.978)IR(0.021)REK(0.001)
P36667	96	0.999805	35.9176	63.181	H	DDDYILFLNPDIIMKHDDLLTYIKYVESKRY	H(1)DDLLTYIK(0.237)YVESK(0.763)
P36938	147	0.900985	9.59018	81.329	H	KKGGPLADGIVITPSHNPPEDGGIKYNPPNG	GGPLADGIVITPSH(0.901)NPPEDGGIK(0.099)
P36999	42	0.961459	13.9701	61.213	H	FDMAKEGYVNLLPVQHKRSRDPGDSAEMMQA	EGYVNLLPVQH(0.961)K(0.039)
P37005	216	0.491192	0	51.762	H	QQRLGLLEQRDTAMLHRLLHDIEKNITK___	DTAMLH(0.491)R(0.491)LLH(0.86)DIEK(0.158)
P37005	220	0.85968	7.80444	51.762	H	GLLEQRDTAMLHRLLHDIEKNITK_______	DTAMLH(0.491)R(0.491)LLH(0.86)DIEK(0.158)
P37014	182	0.95122	13.8683	60.246	H	IMQHRRIALLELIQKHIRDRDLIGMVDRITT	IALLELIQK(0.99)H(0.951)IR(0.047)DR(0.012)
P37147	107	0.969828	15.2764	62.338	H	TDFLGLLLLLPPVQKHLTVKLMPHLRFSRMP	H(0.97)LTVK(0.03)LMPH(0.21)LR(0.883)FSR(0.907)
P37388	479	0.981371	16.4353	61.593	H	ELPEVLGLSDRVLVMHEGKLKANLINHNLTQ	VLVMH(0.981)EGK(0.18)LK(0.838)
P37610	269	0.999844	38.0809	47.869	H	QHYANADYLPQRRIMHRATILGDKPFYRAG_	IMH(1)R(1)ATILGDK
P37653	129	0.530794	1.89304	52.966	H	GRYHQWMNELPERVSHKTQHLDEKKELGHLS	VSH(0.531)K(0.126)TQH(0.344)LDEK(0.999)K(1)
P37679	4	0.968922	14.9492	61.679	H	____________MRNHQLGIYEKALAKDLSW	MRNH(0.969)QLGIYEK(0.031)
P37774	14	1	57.785	57.785	H	__MSAIEVKNLVKKFHGQTVLHGIDLEVKPG	FH(1)GQTVLH(1)GIDLEVK(1)
P37774	20	1	57.785	57.785	H	EVKNLVKKFHGQTVLHGIDLEVKPGEVVAII	FH(1)GQTVLH(1)GIDLEVK(1)
P37903	109	0.774692	5.24846	42.095	H	SPKDRILELAKKIPAHMIIIASHRPDITTYL	K(0.227)IPAH(0.775)MIIIASH(0.859)R(0.14)
P37903	116	0.858641	7.70978	42.095	H	ELAKKIPAHMIIIASHRPDITTYLLGSNAAA	K(0.227)IPAH(0.775)MIIIASH(0.859)R(0.14)
P38521	14	0.999967	44.8202	46.89	H	__MAKNRSRRLRKKMHIDEFQELGFSVAWRF	MH(1)IDEFQELGFSVAWR
P40711	38	0.99689	25.0968	71.888	H	QGAGGQHVNKTSTAIHLRFDIRASSLPEYYK	AQGAGGQH(0.001)VNK(0.999)TSTAIH(0.997)LR(0.003)
P42597	121	0.893681	9.42626	61.593	H	VFRNAPEPFLRMIVVHELAHLKEKEHNKAFY	MIVVH(0.894)ELAH(0.102)LK(0.004)
P45425	78	1	40.0859	40.086	H	STGIIRDGSLLALNPHNLGGLLHFPLVKTLE	DGSLLALNPH(1)NLGGLLH(1)FPLVK(1)
P45425	85	1	40.0859	40.086	H	GSLLALNPHNLGGLLHFPLVKTLEQLTNLPT	DGSLLALNPH(1)NLGGLLH(1)FPLVK(1)
P46122	31	1	55.7342	55.734	H	SLSACVQQSEVRQMKHSVSTLNQEMTQLNQE	H(1)SVSTLNQEMTQLNQETVK(1)
P46890	171	0.814135	6.41497	53.211	H	TRFDNNTQRPIGDLAHHWETSTDGLRWDFYL	PIGDLAH(0.814)H(0.186)WETSTDGLR(1)
P52095	379	0.996353	24.3647	63.426	H	STHKMLAALSQASLIHIKGEYDEEAFNEAFM	MLAALSQASLIH(0.996)IK(0.004)
P52123	155	0.999788	36.7299	58.781	H	PLVIEPFSINDIFKAHLMFASISFFWGKSIM	AH(1)LMFASISFFWGK
P52127	381	1	58.782	58.782	H	LYVEKAGAEKILENVHIVRRDPEGDQLWIGF	ILENVH(1)IVR(1)
P52598	64	0.999893	43.1038	67.214	H	VVLVSGGVQSPGRVAHEPSHQVKTALAMTQK	VAH(1)EPSH(0.959)QVK(0.037)TALAMTQK(0.004)
P52598	68	0.959416	14.2014	67.214	H	SGGVQSPGRVAHEPSHQVKTALAMTQKAAIG	VAH(1)EPSH(0.959)QVK(0.037)TALAMTQK(0.004)
P60390	242	1	51.4359	51.436	H	LNVLAPGGRLSIISFHSLEDRIVKRFMRENS	LSIISFH(1)SLEDR(1)IVK(1)
P63224	175	0.999386	34.1081	65.895	H	IRVPHFGYADRIQEIHIKVIHILIQLIEKEM	IQEIH(0.999)IK(0.997)VIH(0.999)ILIQLIEK(0.002)EMVK(0.002)
P63224	180	0.999386	34.1081	65.895	H	FGYADRIQEIHIKVIHILIQLIEKEMVK___	IQEIH(0.999)IK(0.997)VIH(0.999)ILIQLIEK(0.002)EMVK(0.002)
P67338	10	0.999684	35.0052	70.808	H	______MFAGLPSLTHEQQQKAVERIQELMA	MFAGLPSLTH(1)EQQQK
P71243	84	0.576575	0	41.257	H	VAKLRHRASQTLRGIHRKNTWQALNLKRYGA	GIH(0.577)R(0.577)K(0.849)NTWQALNLK(0.998)
P71297	64	0.968614	14.8751	87.754	H	SALRKSVACAKLKILHLKQRMQNATNFLARL	LK(0.996)ILH(0.969)LK(0.036)
P75691	274	0.999965	44.5217	56.29	H	KRDGTMTLVGAPATPHKSPEVFNLIMKRRAI	RDGTMTLVGAPATPH(1)K(1)
P75817	159	0.996181	24.1638	50.04	H	SDTKLAQLRKALPWLHEQLPQLKVITVNIQP	K(1)ALPWLH(0.996)EQLPQLK(0.004)
P75908	270	1	59.2647	59.265	H	IEVVSKLTVMVIFMCHIFSALRVTKNIAHRD	LTVMVIFMCH(1)IFSALR(1)
P75948	23	0.999806	37.9359	50.723	H	PITRDELLSRFFPQYHPVTTFNSGLSGGSFL	FFPQYH(1)PVTTFNSGLSGGSFLIEHQGQR
P75974	5	0.989114	19.5986	73.665	H	___________MKTIHDIRRSNARKLRDGVG	K(0.011)TIH(0.989)DIRR
P76180	89	1	40.8441	40.844	H	WLTIAFFKRRRCVPKHYIIWLLISVLLAVKA	R(1)CVPK(1)H(1)YIIWLLISVLLAVK(1)
P76245	201	0.333312	0	50.04	H	RAIFENLTTLFSLARHLNHKIMIAFIDLDNF	H(0.333)LNH(0.333)K(0.333)IMIAFIDLDNFK
P76245	204	0.333312	0	50.04	H	FENLTTLFSLARHLNHKIMIAFIDLDNFKLI	H(0.333)LNH(0.333)K(0.333)IMIAFIDLDNFK
P77378	79	1	52.1672	52.167	H	TENYAESIAALLKDKHPAMLLLAATKRGKAL	H(1)PAMLLLAATK(1)
P77581	121	0.947992	12.6561	44.252	H	AEANEAALKLARKFAHDRYGSHKSGIVAFKN	FAH(0.948)DR(0.963)YGSH(0.925)K(0.15)SGIVAFK(0.015)
P77581	127	0.924686	11.0038	44.252	H	ALKLARKFAHDRYGSHKSGIVAFKNAFHGRT	FAH(0.948)DR(0.963)YGSH(0.925)K(0.15)SGIVAFK(0.015)
Q2EEQ8	9	0.985197	18.3939	49.418	H	_______MELKKLMEHISITPDYRQAWKVVH	K(0.001)LMEH(0.985)ISITPDYR(0.014)
Q46911	445	0.497568	0	52.231	H	IRLGGSMVHHHGIGKHRVHWSKLEHGSAWAL	H(0.498)R(0.498)VH(0.005)WSK
P0A8V2	1147	0.999998	58.4926	89.561	R	LKQQQEVAKLREFIQRAYDLGADVRQKVDLS	EFIQR(1)AYDLGADVRQK
P0AD01	225	0.998797	28.9837	78.264	R	TSIHYGVTGRPVYRYRIQAEHYSLLKQYCQ_	YR(0.999)IQAEH(0.953)YSLLK(0.048)
P0AE88	11	0.996694	24.7923	69.03	R	_____MNKILLVDDDRELTSLLKELLEMEGF	MNK(0.003)ILLVDDDR(0.997)ELTSLLK(1)
P0AF67	20	0.818462	6.54843	49.188	R	VIPLPDEQATLDLGERVAKACDGATVIYLYG	MMNRVIPLPDEQATLDLGER(0.818)VAK(0.181)
P0AFG8	167	0.995871	25.7338	69.72	R	AFLEGRLTQEQLDNFRQEVHGNGLSSYPHPK	LTQEQLDNFR(0.996)QEVH(0.078)GNGLSSYPH(0.014)PK(0.912)
P14081	236	1	40.1769	40.177	R	LHAQNQPTETANAGQRIALNIAGDAEKEQIN	ALH(1)AQNQPTETANAGQR(1)IALNIAGDAEK(1)
P16916	1370	0.76515	5.13023	89.698	R	KDAKSTQKAWNCRHSRQSNDKKR________	H(0.235)SR(0.765)QSNDKK
P17443	44	0.999948	42.8155	98.048	R	LMAQGWQVRWLGTADRMEADLVPKHGIEIDF	WLGTADR(1)MEADLVPK
P23367	177	0.967974	15.2799	58.781	R	RTEKTEFNHIDEIIRRIALARFDVTINLSHN	R(0.968)IALAR(0.032)FDVTINLSH(0.69)NGK(0.31)
P23538	418	0.999874	39.3435	121.61	R	PIMKKASAIVTNRGGRTCHAAIIARELGIPA	GGR(1)TCHAAIIAR
P25666	279	1	47.559	56.013	R	RCFRSNTLGAKMQALRIFLSRK_________	MQALR(1)IFLSR(1)
P27249	426	1	94.4764	106.68	R	LCNIPEARKLFLSILRHPGAVRRGLLPMHRH	LFLSILR(1)H(1)PGAVR
P27375	170	0.979165	16.5784	65.905	R	KGKSVKFFTIAYNLLRNKQLPQPSK______	SVK(0.052)FFTIAYNLLR(0.979)NK(0.968)
P31119	29	0.949989	12.7911	47.104	R	YRVRVTGDTQALKGERVLITPNHVSFIDGIL	VTGDTQALK(0.054)GER(0.95)VLITPNH(0.995)VSFIDGILLGLFLPVR(0.001)
P31806	367	0.999998	56.2633	58.63	R	WDADALNLLAINPDKRHNRVITPHPGEAARL	R(1)H(1)NR(1)VITPH(1)PGEAAR
P31806	370	0.999998	56.2633	58.63	R	DALNLLAINPDKRHNRVITPHPGEAARLLGC	R(1)H(1)NR(1)VITPH(1)PGEAAR
P37005	217	0.491192	0	51.762	R	QRLGLLEQRDTAMLHRLLHDIEKNITK____	DTAMLH(0.491)R(0.491)LLH(0.86)DIEK(0.158)
P46142	265	0.999901	40.0628	71.98	R	EVPIQQKRDFDINEQRRQTFLQSQKLSRKLQ	DFDINEQR(1)R(1)QTFLQSQK
P46142	266	0.999688	35.0572	71.98	R	VPIQQKRDFDINEQRRQTFLQSQKLSRKLQD	DFDINEQR(1)R(1)QTFLQSQK
P60390	247	1	51.4359	51.436	R	PGGRLSIISFHSLEDRIVKRFMRENSRGPQV	LSIISFH(1)SLEDR(1)IVK(1)
P64550	7	0.999933	41.7286	65.252	R	_________MFSPQSRLRHAVADTFAMVVYC	MFSPQSR(1)LR
P76539	20	0.919024	10.5499	66.261	R	VFRQEDFEEVITLWERCDLLRPWNDPEMDIE	VFRQEDFEEVITLWER(0.919)CDLLR(0.081)
P77374	6	0.985775	18.4102	61.213	R	__________MSKNERMVGISRRTLVKSTAI	SK(0.014)NER(0.986)MVGISR
Q47083	204	0.978303	16.555	84.687	R	IAKWPLITYRQGITGRSRIDDAFARKGLLAD	WPLITYRQGITGR(0.978)SR(0.022)

## Sheet: E.coli-filtered sites
Proteins	Positions within proteins	Localization prob	Score diff	Score	Amino acid	Sequence window	Phosphorylation(HKR) Probabilities
A8DYQ1	20	1	41.5102	41.51	K	FIFDNLIILAVPFMIKTSLKTNLIFFFLCVF	NFIFDNLIILAVPFMIK(1)TSLK(1)
C1P5Z8	5	0.860184	8.45882	68.626	K	___________MKENKVQQISHKLINIVVFV	MK(0.123)ENK(0.86)VQQISHK(0.017)
P04994	443	0.968679	15.2076	46.578	K	MLTTRLEDGWIESEVKNIQPVKKSRKKVH__	AGEMLTTR(0.002)LEDGWIESEVK(0.969)NIQPVK(0.029)
P04995	216	0.999704	35.6901	49.632	K	QPRLFDYLFTHRNKHKLMALIDVPQMKPLVH	H(1)K(1)LMALIDVPQMK
P06960	42	0.999963	44.3531	74.46	K	AAQLKADKKNGKEVQKLTGKNIALIFEKDST	EVQK(1)LTGK(1)NIALIFEK
P06960	46	0.999904	40.1858	74.46	K	KADKKNGKEVQKLTGKNIALIFEKDSTRTRC	EVQK(1)LTGK(1)NIALIFEK
P07004	10	0.999762	36.2412	49.929	K	______MLEQMGIAAKQASYKLAQLSSREKN	LEQMGIAAK(1)QASYK(1)LAQLSSR
P08331	158	1	44.2941	44.294	K	IDARTKQPMFTPYLIKDTEVVDKDGKKQTLK	QPMFTPYLIK(1)DTEVVDK(1)
P08400	265	0.999818	39.8434	48.389	K	TQRMEGLVKQLLTLSKIEAAPTHLLNEKVDV	QLLTLSK(1)IEAAPTH(0.993)LLNEK(0.993)VDVPMMLR(0.014)
P08400	277	0.99291	23.9302	48.389	K	TLSKIEAAPTHLLNEKVDVPMMLRVVEREAQ	QLLTLSK(1)IEAAPTH(0.993)LLNEK(0.993)VDVPMMLR(0.014)
P08622	308	0.903132	9.54091	66.351	K	VPGETQTGKLFRMRGKGVKSVRGGAQGDLLC	MR(0.968)GK(0.903)GVK(0.128)
P0A6F5	207	0.792891	8.66697	56.416	K	GMQFDRGYLSPYFINKPETGAVELESPFILL	GYLSPYFINK(0.793)PETGAVELESPFILLADK(0.108)K(0.099)
P0A6M8	430	0.999999	61.4919	81.771	K	VISIAVEPKTKADQEKMGLALGRLAKEDPSF	ADQEK(1)MGLALGRLAK
P0A712	4	1	40.3775	58.274	K	____________MQIKRSIEKIPGGMMLVPL	MQIK(1)R(1)SIEK(1)
P0A7U7	5	0.999184	29.9303	46.844	K	___________MANIKSAKKRAIQSEKARKH	MANIK(0.999)SAK(0.197)K(0.804)
P0A832	8	0.999988	49.2838	65.224	K	________MTKKKAHKPGSATIALNKRARHE	AH(1)K(1)PGSATIALNK
P0A877	199	1	40.9939	40.994	K	GAENRAALPLNHLVAKLKEYNAAPPLQGFGI	AALPLNH(1)LVAK(1)LK(1)
P0A884	48	0.774243	5.35237	43.798	K	QMRFNLQDGFPLVTTKRCHLRSIIHELLWFL	FNLQDGFPLVTTK(0.774)R(0.226)
P0A8B5	4	0.998191	27.8116	40.154	K	____________MFGKGGLGNLMKQAQQMQE	MFGK(0.998)GGLGNLMK(0.002)
P0A8G9	3	1	68.9002	91.265	K	_____________MPKKNEAPASFEKALSEL	MPK(1)K(1)NEAPASFEK
P0A8G9	4	1	69.3788	91.265	K	____________MPKKNEAPASFEKALSELE	MPK(1)K(1)NEAPASFEK
P0A8V2	279	0.999452	32.6084	48.372	K	EKGRRITARHIRQLEKDDVKLIEVPVEYIAG	QLEK(0.999)DDVK(1)LIEVPVEYIAGK(0.001)
P0A8V2	283	0.999559	33.5552	48.372	K	RITARHIRQLEKDDVKLIEVPVEYIAGKVVA	QLEK(0.999)DDVK(1)LIEVPVEYIAGK(0.001)
P0A930	264	0.9998	36.9858	64.757	K	VPRNDDLKVFVMGEVKKQSTLKMDFSGMTLT	VFVMGEVK(1)K
P0A9J0	370	0.921094	11.219	65.565	K	DHRRRVLHSLEQALSKDRVKTSVNGFSALGL	VLH(1)SLEQALSK(0.921)DR(0.07)VK(0.009)
P0A9T6	50	0.999999	60.222	86.136	K	HVHRNSVSALINNNRKLTTEMAFRLAKVFDT	K(1)LTTEMAFR(1)LAK
P0A9Y6	15	0.974543	15.83	58.693	K	_MAKIKGQVKWFNESKGFGFITPADGSKDVF	WFNESK(0.975)GFGFITPADGSK(0.025)
P0A9Z1	2	1	62.4662	62.466	K	______________MKKIDAIIKPFKLDDVR	MK(1)K(1)IDAIIK(1)
P0A9Z1	3	1	62.4662	62.466	K	_____________MKKIDAIIKPFKLDDVRE	MK(1)K(1)IDAIIK(1)
P0ABA6	10	0.969775	14.6354	68.171	K	______MAGAKEIRSKIASVQNTQKITKAME	SK(0.97)IASVQNTQK(0.909)ITK(0.121)
P0ABA6	19	0.909054	9.8512	68.171	K	AKEIRSKIASVQNTQKITKAMEMVAASKMRK	SK(0.97)IASVQNTQK(0.909)ITK(0.121)
P0ABZ6	134	1	43.5122	43.512	K	AYDGLNYNTYRNQIRKEMIISEVRNNEVRRR	K(1)EMIISEVR(1)
P0AC33	15	0.928007	11.2206	50.806	K	_MSNKPFHYQAPFPLKKDDTEYYLLTSEHVS	MSNK(0.002)PFHYQAPFPLK(0.928)K(0.07)
P0ACE3	4	0.904273	9.74844	54.066	K	____________MSEKPLTKTDYLMRLRRCQ	SEK(0.904)PLTK(0.097)TDYLMR(0.999)
P0ACX5	6	1	46.955	46.955	K	__________MGNRTKEDELYREMCRVVGKV	GNR(1)TK(1)EDELYR(1)
P0AD61	145	1	101.664	101.66	K	IGMEVTAIEGNKVICKVLNNGDLGENKGVNL	VICK(1)VLNNGDLGENK(1)
P0AD68	342	0.835152	5.33117	41.988	K	SVLNTIPYRINGHEIKDVARYSELTLTGVLQ	ENSVLNTIPYR(0.045)INGH(0.502)EIK(0.835)DVAR(0.617)
P0ADK8	89	0.998819	28.65	70.907	K	RAITKKEQADMGKLKKSVRGLVVVHPMTALG	K(0.999)SVR(0.135)GLVVVH(0.866)PMTALGR(1)
P0AE08	7	0.908709	9.97998	44.753	K	_________MSLINTKIKPFKNQAFKNGEFI	MSLINTK(0.909)IK(0.091)
P0AEC3	758	0.902491	9.66428	72.028	K	LPAWEDNVGEWIEEMKEEWRHDVEVLKAWVA	HLQQLGQQIQSPDLPAWEDNVGEWIEEMK(0.902)EEWR(0.098)
P0AEP1	453	0.939977	14.6911	51.276	K	ETKHVSLEHIERNLMKGRKLREIGAHD____	HVSLEH(0.852)IER(0.174)NLMK(0.94)GR(0.033)
P0AEV1	108	1	48.5269	48.527	K	DIAKALRLGVEDVLLKPVKDLNRLREMVFAC	ALR(1)LGVEDVLLK(1)PVK(1)
P0AEZ3	175	0.994727	22.757	52.693	K	LASKSRRAENGEEPIKEHLLLTRYNPGRVSR	RAENGEEPIK(0.995)EH(0.974)LLLTR(0.031)
P0AF06	2	1	43.0844	43.084	K	______________MKNQAHPIIVVKRRKAK	MK(1)NQAH(1)PIIVVK(1)
P0AF93	3	1	45.187	45.187	K	_____________MSKTIATENAPAAIGPYV	MSK(1)TIATENAPAAIGPYVQGVDLGNMIITSGQIPVNPK(1)
P0AFN6	10	0.809446	6.29129	41.383	K	______MMHLYWVALKSIWAKEIHRFMRIWV	MHLYWVALK(0.809)SIWAK(0.19)
P0AFP4	12	0.957401	12.2733	47.622	K	____MTHKATEILTGKVMQKSVLITGCSSGI	TH(0.56)K(0.434)ATEILTGK(0.957)VMQK(0.049)
P0AG00	210	0.962345	13.8627	62.464	K	KGAWAARTIQMKAQVKRQEEVAKAIYDRRMN	TIQMK(0.084)AQVK(0.962)R(0.954)
P0AG24	285	0.997935	26.7754	68.224	K	SDTCYRVLGQMHSLYKPRPGRVKDYIAIPKA	VLGQMH(0.017)SLYK(0.998)PR(0.985)
P0AG27	36	1	53.6827	53.683	K	LLVAVLVTTFKSLTSKVKVITRGEATRLINK	SLTSK(1)VK(1)VITR(1)
P0AG27	38	1	53.6827	53.683	K	VAVLVTTFKSLTSKVKVITRGEATRLINKED	SLTSK(1)VK(1)VITR(1)
P0AG78	252	0.999981	46.8111	65.224	K	LAEPTVSVVDKVVEKKGTKEVAEAYLKYLYS	K(1)GTK(0.086)EVAEAYLK(0.914)
P0AGG2	6	1	46.9854	46.985	K	__________MSQALKNLLTLLNLEKIEEGL	SQALK(1)NLLTLLNLEK(1)
P0AGK4	6	0.925246	11.867	74.165	K	__________MNLSTKQKQHLKGLAHPLKPV	MNLSTK(0.925)QK(0.85)QH(0.065)LK(0.16)
P0AGK4	8	0.849562	9.00776	74.165	K	________MNLSTKQKQHLKGLAHPLKPVVL	MNLSTK(0.925)QK(0.85)QH(0.065)LK(0.16)
P0C8K0	2	0.901102	8.50704	72.731	K	______________MKHLTEMVRQHKAGKTN	MK(0.901)H(0.796)LTEMVR(0.099)QH(0.099)K(0.106)
P0CF60	40	0.999625	34.468	59.796	K	AVPPSKRAHTGRVAVKESNQRWCSDGFEFCC	AHTGRVAVK(1)ESNQR(1)
P0DUW4	13	0.751459	5.10819	43.494	K	___MNLIIILVWHSMKHSKGYVLEAQDDELS	MNLIIILVWH(0.212)SMK(0.751)H(0.456)SK(0.456)GYVLEAQDDELSR(0.125)
P10121	405	0.951329	12.8844	54.537	K	KSHLMEELKKIVRVMKKLDVEAPHEVMLTID	IVR(0.994)VMK(0.951)K(0.054)
P10151	313	0.998087	27.1719	49.537	K	DKGHQWMEEQLVSICKR______________	GH(0.999)QWMEEQLVSICK(0.998)R(0.003)
P10408	4	1	65.8071	90.15	K	____________MLIKLLTKVFGSRNDRTLR	MLIK(1)LLTK(0.997)VFGSR(0.003)
P10408	8	0.999982	47.4684	90.15	K	________MLIKLLTKVFGSRNDRTLRRMRK	LIK(1)LLTK(1)VFGSR
P11447	118	0.839831	7.1893	56.766	K	LHTGRSRNDQVATDLKLWCKDTVSELLTANR	NDQVATDLK(0.84)LWCK(0.161)DTVSELLTANR(0.999)
P11553	2	0.999997	55.7065	73.802	K	______________MKQEVILVLDCGATNVR	MK(1)QEVILVLDCGATNVR
P11864	258	1	46.8795	46.88	K	DITEEQLKIMRFAIIKSIPRATLTDKLENEL	IMR(1)FAIIK(1)SIPR(1)
P11875	553	1	42.8179	42.818	K	PILSAENEEVRNSRLKLAQLTAKTLKLGLDT	NSR(1)LK(1)LAQLTAK(1)
P13458	440	0.868667	8.19842	45.879	K	RQHLVALHGQIVPQQKRLAQLQVAIQNVTQE	PLR(1)QH(1)LVALH(0.999)GQIVPQQK(0.869)R(0.133)
P13669	4	0.986125	21.5272	50.039	K	____________MGHKPLYRQIADRIREQIA	MGH(0.007)K(0.986)PLYR(0.007)
P14294	537	1	66.073	66.073	K	LGTEATRAGIIELLFKRGFLTKKGRYIHSTD	AGIIELLFK(1)R(1)
P15032	4	0.999492	32.3557	53.013	K	____________MSTKPLFLLRKAKKSSGEP	MSTK(0.999)PLFLLR(0.875)K(0.125)
P15373	16	0.866828	8.12917	54.288	K	MPANARSHAVLTTESKVTIRGQTTIPAPVRE	MPANAR(1)SH(0.999)AVLTTESK(0.867)VTIR(0.134)
P16431	545	0.840152	7.17082	63.184	K	PCYSCTDRMTVVDVRKKKSKVVPYKELERYS	MTVVDVR(0.993)K(0.84)K(0.167)
P17888	395	0.991849	20.761	46.319	K	RAGNARPAIQHVLDLKGQKVQAGLAPALITR	AGNAR(0.988)PAIQH(0.029)VLDLK(0.992)GQK(0.991)
P17993	183	0.999972	48.4208	68.657	K	LMAVVGAEYILRMVPKGTHDVKKFIKPAELL	MVPK(1)GTH(1)DVKK
P19642	480	0.999998	57.7339	77.124	K	IVSLDNCITRLRLSVKDMSLVNVQALKDNRA	LSVK(1)DMSLVNVQALKDNR
P19769	208	0.998674	31.3762	65.246	K	YRMRRYQNILKEHGIKQSMSRKGNCLDNAVV	EH(1)GIK(0.999)QSMSR(0.001)K(0.001)
P22525	308	1	56.4282	56.428	K	TAETKPMDKQTTSRSKPAPAVRAAYDNELVE	SK(1)PAPAVR(1)AAYDNELVEAVK(1)
P23862	2	0.99648	24.5152	48.198	K	______________MKTALLLEKLEGQLATL	K(0.996)TALLLEK(0.999)LEGQLATLR(0.004)
P23862	9	0.999049	30.2001	48.198	K	_______MKTALLLEKLEGQLATLRQRCAPV	K(0.996)TALLLEK(0.999)LEGQLATLR(0.004)
P25516	453	0.999986	46.0927	65.224	K	TSNPSVLMAAGLLAKKAVTLGLKRQPWVKAS	K(1)AVTLGLK(0.42)R(0.58)
P25741	5	0.99994	42.2867	72.705	K	___________MVELKEPLATLWRGKDAFAE	VELK(1)EPLATLWRGK
P31060	392	1	47.1889	47.189	K	QQKLVQQWLDILGIDKRTADAPFHSLSWGQQ	LVQQWLDILGIDK(1)R(1)
P31600	53	0.999885	39.3703	42.976	K	GLSDYRHFVIYPRLDKALKAQKNNDEATAIR	H(0.001)FVIYPR(0.999)LDK(1)ALK(1)
P31678	92	0.992991	21.9347	45.618	K	PLAGVHGAERRDINGKTHIVHLPDAIARDIS	R(0.008)DINGK(0.993)TH(0.994)IVH(0.994)LPDAIAR(0.011)
P31801	9	0.849734	11.0561	56.414	K	_______MSNAQEAVKTRHKETSLIFPVLAL	MSNAQEAVK(0.85)TR(0.067)H(0.067)K(0.017)
P33228	113	0.994346	22.4527	68.515	K	AYLLPFGNKNEKSGKKNVQLIIGYRGMIDLA	K(0.994)NVQLIIGYR(0.006)GMIDLAR
P33369	270	0.92409	9.98314	51.971	K	KIIEARLSALTNNQTKSLKLKPVALPKVASQ	LSALTNNQTK(0.924)SLK(0.832)LK(0.244)
P33369	273	0.832071	6.53489	51.971	K	EARLSALTNNQTKSLKLKPVALPKVASQLPD	LSALTNNQTK(0.924)SLK(0.832)LK(0.244)
P36879	11	1	77.5333	77.533	K	_____MTIALELQQLKKTYPGGVQALRGIDL	TIALELQQLK(1)K(1)
P36938	133	0.875154	8.64295	139.02	K	TPTPAVSNAILVHNKKGGPLADGIVITPSHN	K(0.875)GGPLADGIVITPSH(0.005)NPPEDGGIK(0.12)
P37014	181	0.989511	20.6654	60.246	K	EIMQHRRIALLELIQKHIRDRDLIGMVDRIT	IALLELIQK(0.99)H(0.951)IR(0.047)DR(0.012)
P37147	111	0.946442	14.3441	44.367	K	GLLLLLPPVQKHLTVKLMPHLRFSRMPGGGF	H(0.002)LTVK(0.946)LMPH(0.043)LR(0.067)FSR(0.942)
P37615	48	0.896203	9.3622	64.803	K	NDMAPLQQKLVVVSNKREKPINDRRSRQQEV	LVVVSNK(0.896)R(0.104)
P37639	176	1	43.3824	43.382	K	LARIASELLMSPSLLKKKLREEETSYSQLLT	IASELLMSPSLLK(1)K(1)K(1)
P37639	177	1	43.3824	43.382	K	ARIASELLMSPSLLKKKLREEETSYSQLLTE	IASELLMSPSLLK(1)K(1)K(1)
P37653	137	0.999462	30.6461	52.966	K	ELPERVSHKTQHLDEKKELGHLSAGARRLIL	VSH(0.531)K(0.126)TQH(0.344)LDEK(0.999)K(1)
P39208	16	1	81.2776	81.278	K	MAGESFILMGVSGSGKTLIGSKVAALLSAKF	AGESFILMGVSGSGK(1)TLIGSK(1)
P39212	85	0.999813	37.2717	43.512	K	LRKKLQRIEMENEILKRLL____________	LQR(0.001)IEMENEILK(1)R(1)
P39414	131	1	46.1286	46.129	K	YEKTGLGRRIALILVKKMGHRTLFLGYAVMF	IALILVK(1)K(1)MGH(1)R(1)
P39414	132	1	46.1286	46.129	K	EKTGLGRRIALILVKKMGHRTLFLGYAVMFS	IALILVK(1)K(1)MGH(1)R(1)
P40711	32	0.999892	41.5521	71.888	K	ITAIRAQGAGGQHVNKTSTAIHLRFDIRASS	AQGAGGQHVNK(1)TSTAIH(0.996)LR(0.004)
P42619	2	0.999869	38.8317	44.612	K	______________MKKLEDVGVLVARILMP	K(1)K(1)LEDVGVLVAR
P42619	3	0.999873	38.9521	44.612	K	_____________MKKLEDVGVLVARILMPI	K(1)K(1)LEDVGVLVAR
P42632	111	0.898155	9.45412	53.089	K	QPLEKIVGLQTDAPLKRALHPFGGINMIKSS	IVGLQTDAPLK(0.898)R(0.102)
P46889	1132	0.924067	11.0899	58.01	K	VVLVDEFADLMMTVGKKVEELIARLAQKARA	EPYIVVLVDEFADLMMTVGK(0.924)K(0.076)
P52106	197	0.95011	11.8562	41.429	K	ISENTVKTHLYNLFKKIAVKNRTQAVSWAND	K(0.95)IAVK(0.235)NR(0.815)
P52613	133	0.999993	51.4559	52.716	K	QSTAALLAENRLDQKKMDEFAQRAAMRKPE_	K(1)MDEFAQR
P60566	2	0.999965	44.5473	49.442	K	______________MKIITCYKCVPDEQDIA	MK(1)IITCYK
P60716	3	0.982657	17.7833	46.001	K	_____________MSKPIVMERGVKYRDADK	MSK(0.983)PIVMER(0.017)
P62399	3	0.978001	16.6327	59.884	K	_____________MAKLHDYYKDEVVKKLMT	AK(0.978)LH(0.021)DYYK(0.001)DEVVK
P62517	3	1	47.6029	47.603	K	_____________MNKTTEYIDAMPIAASEK	MNK(1)TTEYIDAMPIAASEK(1)AALPK(1)
P62517	18	1	47.6029	47.603	K	KTTEYIDAMPIAASEKAALPKTDIRAVHQAL	MNK(1)TTEYIDAMPIAASEK(1)AALPK(1)
P63224	177	0.996943	27.8383	65.895	K	VPHFGYADRIQEIHIKVIHILIQLIEKEMVK	IQEIH(0.999)IK(0.997)VIH(0.999)ILIQLIEK(0.002)EMVK(0.002)
P64490	72	0.989232	18.5295	56.527	K	GWNPGFTEKMVGWAKKMETGERSVIKNPEYF	K(0.989)METGER(0.232)SVIK(0.778)
P64631	2	0.999964	44.4609	52.579	K	______________MKKIGVAGLQREQIKKT	K(1)K(1)IGVAGLQR
P64631	3	0.999942	42.3659	52.579	K	_____________MKKIGVAGLQREQIKKTI	K(1)K(1)IGVAGLQR
P65807	3	0.879249	8.5445	51.949	K	_____________MAKNIPFKLILEKAKDYQ	MAK(0.879)NIPFK(0.984)LILEK(0.136)
P65807	8	0.984407	17.4341	51.949	K	________MAKNIPFKLILEKAKDYQADMTR	MAK(0.879)NIPFK(0.984)LILEK(0.136)
P67910	34	1	69.8152	69.815	K	LNDKGITDILVVDNLKDGTKFVNLVDLNIAD	GITDILVVDNLK(1)DGTK(1)
P71297	61	0.995739	23.547	87.754	K	GTYSALRKSVACAKLKILHLKQRMQNATNFL	LK(0.996)ILH(0.969)LK(0.036)
P75683	221	0.999842	37.7204	62.258	K	YTFEVQPGSSVAKDLKLLLGNSQWRIMCAFK	DLK(1)LLLGNSQWR(0.935)IMCAFK(0.065)
P75800	695	1	62.4662	62.466	K	VRISIDDFGTGLSNLKRFYEINPDSIKVDSQ	ISIDDFGTGLSNLK(1)R(1)
P75817	153	0.999944	42.4908	50.04	K	LRFVLRSDTKLAQLRKALPWLHEQLPQLKVI	K(1)ALPWLH(0.996)EQLPQLK(0.004)
P75919	305	0.999788	36.7296	68.033	K	VPTRAGVAQLLRMVRKGVKIAILTNSLAAND	MVR(1)K(1)GVK
P76055	112	0.999722	35.5651	48.852	K	GVEYKIVEENTYGIVKEKIPEGKTTCSLCSR	LGVEYKIVEENTYGIVK(1)EK(1)
P76055	9	0.90376	9.72698	56.721	K	_______MQENQQITKKEQYNLNKLQKRLRR	QENQQITK(0.904)K(0.096)
P76066	9	0.997546	26.4886	42.123	K	_______METVFDALKAMGKATSIELAARLD	METVFDALK(0.998)AMGK(0.988)ATSIELAAR(0.014)
P76066	13	0.98842	19.4743	42.123	K	___METVFDALKAMGKATSIELAARLDISRE	METVFDALK(0.998)AMGK(0.988)ATSIELAAR(0.014)
P76104	458	0.999311	31.6142	48.188	K	QFDEANNAEKAMNNLKDGLAKLGQTLYYARD	AMNNLK(0.999)DGLAK(0.001)
P76180	88	1	40.8441	40.844	K	LWLTIAFFKRRRCVPKHYIIWLLISVLLAVK	R(1)CVPK(1)H(1)YIIWLLISVLLAVK(1)
P76316	54	1	59.4259	59.426	K	RDDVTPMAMGGNKLRKLEFLAADALREGADT	LR(1)K(1)LEFLAADALR(1)
P76393	481	0.996204	26.6689	58.604	K	VGGLEGFIAKRTMLEKMKDEILGLPEEEKRA	R(0.002)TMLEK(0.996)MK(0.002)
P76406	80	1	47.9714	47.971	K	IVKNDATHFCVTQGKKMQIVELKTEGVGLHG	K(1)MQIVELK(1)
P76577	7	0.98992	19.8608	50.473	K	_________MPRLLTKRGCWITLAAAPFLLF	PR(0.024)LLTK(0.99)R(0.986)
P77172	2	1	75.8112	88.948	K	______________MKLNATYIKIRDKWWGL	MK(1)LNATYIK(0.92)IR(0.08)
P77172	9	0.920109	10.6134	88.948	K	_______MKLNATYIKIRDKWWGLPLFLPSL	MK(1)LNATYIK(0.92)IR(0.08)
P77280	312	0.999941	42.263	46.481	K	YPVTIEAISSGRFDVKSMVTHIYDYRDVQQA	FDVK(1)SMVTH(0.993)IYDYR(0.007)
P77293	119	1	47.6028	71.692	K	HLIEKWQAGADMVLAKRSDRSTDGRLKRKTA	WQAGADMVLAK(1)R(1)
P77468	2	0.99971	35.3746	40.373	K	______________MKIPTTTDIPQRYTWCL	MK(1)IPTTTDIPQR
P77733	4	0.999993	51.8288	53.08	K	____________MRNKLSFDLQLSARKAAIA	MR(1)NK(1)LSFDLQLSAR
Q46791	7	1	52.7857	52.786	K	_________MGAELVKWVKSHKIDAHIITFV	GAELVK(1)WVK(1)
P57998	73	1	66.7992	66.799	H	WLFYAYDRLRKTVVAHVFGERTMATLGRLMS	TVVAH(1)VFGER(1)
P07813	706	1	44.6921	44.692	H	VDALTENQKALRRDVHKTIAKVTDDIGRRQT	ALR(1)R(1)DVH(1)K(1)
P07913	25	0.870438	8.2726	48.371	H	EEGIWMTDVPVPELGHNDLLIKIRKTAICGT	AEEGIWMTDVPVPELGH(0.87)NDLLIK(0.13)
P08400	272	0.993479	24.2937	48.389	H	VKQLLTLSKIEAAPTHLLNEKVDVPMMLRVV	QLLTLSK(1)IEAAPTH(0.993)LLNEK(0.993)VDVPMMLR(0.014)
P0A6F3	48	0.892312	11.3105	45.542	H	QREFEQIYPKPGWVEHDPMEIWATQSSTLVE	EFEQIYPK(0.066)PGWVEH(0.892)DPMEIWATQSSTLVEVLAK(0.042)
P0A6J5	379	1	83.7369	89.186	H	VVGRTRFKNLWLNTGHGTLGWTMACGSGQLL	NLWLNTGH(1)GTLGWTMACGSGQLLSDLLSGR
P0A6K3	8	0.999418	33.5745	61.958	H	________MSVLQVLHIPDERLRKVAKPVEE	MSVLQVLH(0.999)IPDERLR
P0A7B1	424	0.999833	37.7782	48.351	H	EANIHWAKRLTEAGVHVIFSAPGLKIHAKLF	LTEAGVH(1)VIFSAPGLK
P0A7I0	279	0.994741	22.7863	49.536	H	HKNKAKALSVLGARIHAAEMAKRQQAEASTR	IH(0.995)AAEMAK(0.005)R
P0A7N1	54	0.933013	11.4544	70.68	H	GVTYPYVTIDVSSKSHPFYTGKLRTVASEGN	SH(0.933)PFYTGK(0.067)LRTVASEGNVAR(0.999)
P0A832	7	0.999994	52.1238	65.224	H	_________MTKKKAHKPGSATIALNKRARH	AH(1)K(1)PGSATIALNK
P0A8M3	267	0.993863	22.0994	81.65	H	DLYHMQEEAPGMVFWHNDGWTIFRELEVFVR	QLDLYHMQEEAPGMVFWH(0.994)NDGWTIFR(0.006)
P0A9F1	22	0.883747	8.8098	63.212	H	TPTAKKVTQLVNVEEHVEGFRQVREAHRREL	AGTPTAK(0.5)K(0.5)VTQLVNVEEH(0.884)VEGFR(0.116)
P0A9J0	362	0.999995	55.6451	65.565	H	DFIDMNNEDHRRRVLHSLEQALSKDRVKTSV	VLH(1)SLEQALSK(0.765)DR(0.035)VK(0.2)
P0AA80	14	0.926172	10.9876	82.263	H	__MILDTVDEKKKGVHTRYLILLIIFIVTAV	KKGVH(0.926)TR(0.074)
P0AB71	265	0.997673	26.3221	138.04	H	SKKHNLPHNSLNFVFHGGSGSTAQEIKDSVS	HNLPHNSLNFVFH(0.998)GGSGSTAQEIK(0.002)
P0AD01	230	0.953432	13.1065	78.264	H	GVTGRPVYRYRIQAEHYSLLKQYCQ______	YR(0.999)IQAEH(0.953)YSLLK(0.048)
P0AD61	444	0.993175	21.606	55.011	H	FYRLGKELALQSGLAHKGDVVVMVSGALVPS	LGK(0.012)ELALQSGLAH(0.993)K(0.995)
P0ADK8	98	0.866447	8.11475	70.907	H	DMGKLKKSVRGLVVVHPMTALGREMGLQEMT	K(0.999)SVR(0.135)GLVVVH(0.866)PMTALGR(1)
P0ADU2	15	0.939812	14.3879	53.567	H	_MLTVIAEIRTRPGQHHRQAVLDQFAKIVPT	MLTVIAEIRTRPGQH(0.94)H(0.034)R(0.026)
P0AE14	213	1	54.005	54.005	H	WVPVRLAGVVYALIGHGEKALPAWFASLGDF	LAGVVYALIGH(1)GEK(1)
P0AEI1	6	0.978978	19.1232	64.803	H	__________MTKKLHIKTWGCQMNEYDSSK	TK(0.005)K(0.005)LH(0.979)IK(0.012)
P0AEI6	5	0.99428	22.0409	50.024	H	___________MFKPHVTVACVVHAEGKFLV	PH(0.994)VTVACVVH(0.085)AEGK(0.921)
P0AEZ3	177	0.973928	15.711	52.693	H	SKSRRAENGEEPIKEHLLLTRYNPGRVSRGD	RAENGEEPIK(0.995)EH(0.974)LLLTR(0.031)
P0AFH2	202	0.998126	27.2641	50.149	H	ASIARITRGSMIEVLHSNFIRTARAKGLPMR	GSMIEVLH(0.998)SNFIR(0.002)
P0AFL6	4	0.873341	8.38992	41.429	H	____________MPIHDKSPRPQEFAAVDLG	MPIH(0.873)DK(0.127)SPR
P0AGD3	74	0.994621	22.6696	63.202	H	SSEGGVFNNAAQVWNHTFYWNCLAPNAGGEP	SSEGGVFNNAAQVWNH(0.995)TFYWNCLAPNAGGEPTGK(0.005)
P0C8J6	208	0.999323	31.7915	83.359	H	RLENIRQWVNLPLVLHGASGLSTKDIQQTIK	QWVNLPLVLH(0.999)GASGLSTK(0.001)DIQQTIK
P0C8K0	3	0.7961	8.50704	72.731	H	_____________MKHLTEMVRQHKAGKTNG	MK(0.901)H(0.796)LTEMVR(0.099)QH(0.099)K(0.106)
P0DSG3	7	0.82528	6.74693	42.243	H	_________MHAISLHSLAYRRFARNVSLSM	MHAISLH(0.825)SLAYR(0.175)
P12994	63	0.999868	38.7921	49.793	H	VTCYDPDAPTGSGWWHWVVVNLPADTRVLPQ	SFVVTCYDPDAPTGSGWWH(1)WVVVNLPADTR
P14081	222	1	40.1769	40.177	H	LWLTGVNKPMRVRALHAQNQPTETANAGQRI	ALH(1)AQNQPTETANAGQR(1)IALNIAGDAEK(1)
P15373	8	0.99888	28.8801	54.288	H	________MPANARSHAVLTTESKVTIRGQT	MPANAR(1)SH(0.999)AVLTTESK(0.867)VTIR(0.134)
P16659	484	0.886993	8.94815	56.036	H	DAIAPFQVAILPMNMHKSFRVQELAEKLYSE	GIVWPDAIAPFQVAILPMNMH(0.887)K(0.113)
P17993	186	0.999985	51.1114	68.657	H	VVGAEYILRMVPKGTHDVKKFIKPAELLGWV	MVPK(1)GTH(1)DVKK
P18133	395	0.962736	14.146	60.118	H	DKAFVRALRKAFDLPHIKKAS__________	KAFDLPH(0.963)IK(0.037)
P19769	205	0.999929	44.6614	65.246	H	GWQYRMRRYQNILKEHGIKQSMSRKGNCLDN	EH(1)GIK(0.999)QSMSR(0.001)K(0.001)
P21693	121	1	40.8015	40.801	H	LCGGQPFGMQRDSLQHAPHIIVATPGRLLDH	DSLQH(1)APH(1)IIVATPGR(1)
P21693	124	1	40.8015	40.801	H	GQPFGMQRDSLQHAPHIIVATPGRLLDHLQK	DSLQH(1)APH(1)IIVATPGR(1)
P23538	421	0.808182	6.24877	62.799	H	KKASAIVTNRGGRTCHAAIIARELGIPAVVG	GGR(0.192)TCH(0.808)AAIIAR
P23909	74	0.878908	8.61981	41.648	H	GASAGEPIPMAGIPYHAVENYLAKLVNQGES	RGASAGEPIPMAGIPYH(0.879)AVENYLAK(0.121)
P24188	5	0.999512	36.7097	47.971	H	___________MPVLHNRISNDALKAKMLAE	PVLH(1)NR(1)ISNDALK(0.001)AK
P24555	418	0.999987	48.9034	50.632	H	QTEVPGFYAANYRSEHLWIVARDGVEVPVSL	SEH(1)LWIVAR
P25522	165	0.999995	53.0741	56.013	H	GAFSARVNHLVEALTHLRIYVEAAIDFPDEE	VNHLVEALTH(1)LR(1)
P25524	98	0.900558	9.35556	54.471	H	FEGIERWAERKALLTHDDVKQRAWQTLKWQI	K(0.099)ALLTH(0.901)DDVK(0.099)QR(0.902)
P25534	259	0.998394	27.9102	51.727	H	RELQSAFGWRLGKITHAGKRSAYPLALTHAA	LGK(0.007)ITH(0.998)AGK(0.994)
P27249	427	1	94.4764	106.68	H	CNIPEARKLFLSILRHPGAVRRGLLPMHRHS	LFLSILR(1)H(1)PGAVR
P27300	209	0.999375	31.7692	50.392	H	VIVNGGVPRSGEIPMHLLPGQAVNLRTGTRC	SGEIPMH(0.999)LLPGQAVNLR(0.94)TGTR(0.06)
P30850	508	0.815487	6.45694	78.149	H	ATWTSPIRKYGDMINHRLLKAVIKGETATRP	YGDMINH(0.815)R(0.184)LLK
P31119	36	0.99518	24.1352	47.104	H	DTQALKGERVLITPNHVSFIDGILLGLFLPV	VTGDTQALK(0.054)GER(0.95)VLITPNH(0.995)VSFIDGILLGLFLPVR(0.001)
P31453	72	1	46.3244	46.324	H	RRHGSGTYLVRKDVLHQTASLTGLVEVLKRQ	DVLH(1)QTASLTGLVEVLK(1)
P31572	3	0.99859	28.5024	65.263	H	_____________MDHLPMPKFGPLAGLRVV	DH(0.999)LPMPK(0.001)
P31574	166	1	42.0945	42.095	H	TFDAAQPDASRTGETHTVEWQAPAVAITRTA	TGETH(1)TVEWQAPAVAITR(1)
P31806	368	0.999998	56.2633	58.63	H	DADALNLLAINPDKRHNRVITPHPGEAARLL	R(1)H(1)NR(1)VITPH(1)PGEAAR
P31806	375	0.999675	34.8757	58.63	H	LAINPDKRHNRVITPHPGEAARLLGCSVAEI	R(1)H(1)NR(1)VITPH(1)PGEAAR
P33030	21	0.87777	7.7101	46.92	H	LITGFLGSGKTTSILHLLAHKDPNEKWAVLV	MTRTNLITGFLGSGK(0.003)TTSILH(0.878)LLAH(0.831)K(0.288)
P33030	25	0.831399	6.2943	46.92	H	FLGSGKTTSILHLLAHKDPNEKWAVLVNEFG	MTRTNLITGFLGSGK(0.003)TTSILH(0.878)LLAH(0.831)K(0.288)
P33195	324	0.978009	16.6852	101.6	H	AGNTALRMAMQTREQHIRREKANSNICTSQV	EQH(0.978)IR(0.021)REK(0.001)
P36667	96	0.999805	35.9176	63.181	H	DDDYILFLNPDIIMKHDDLLTYIKYVESKRY	H(1)DDLLTYIK(0.237)YVESK(0.763)
P36938	147	0.900985	9.59018	81.329	H	KKGGPLADGIVITPSHNPPEDGGIKYNPPNG	GGPLADGIVITPSH(0.901)NPPEDGGIK(0.099)
P36999	42	0.961459	13.9701	61.213	H	FDMAKEGYVNLLPVQHKRSRDPGDSAEMMQA	EGYVNLLPVQH(0.961)K(0.039)
P37005	220	0.85968	7.80444	51.762	H	GLLEQRDTAMLHRLLHDIEKNITK_______	DTAMLH(0.491)R(0.491)LLH(0.86)DIEK(0.158)
P37014	182	0.95122	13.8683	60.246	H	IMQHRRIALLELIQKHIRDRDLIGMVDRITT	IALLELIQK(0.99)H(0.951)IR(0.047)DR(0.012)
P37147	107	0.969828	15.2764	62.338	H	TDFLGLLLLLPPVQKHLTVKLMPHLRFSRMP	H(0.97)LTVK(0.03)LMPH(0.21)LR(0.883)FSR(0.907)
P37388	479	0.981371	16.4353	61.593	H	ELPEVLGLSDRVLVMHEGKLKANLINHNLTQ	VLVMH(0.981)EGK(0.18)LK(0.838)
P37610	269	0.999844	38.0809	47.869	H	QHYANADYLPQRRIMHRATILGDKPFYRAG_	IMH(1)R(1)ATILGDK
P37679	4	0.968922	14.9492	61.679	H	____________MRNHQLGIYEKALAKDLSW	MRNH(0.969)QLGIYEK(0.031)
P37774	14	1	57.785	57.785	H	__MSAIEVKNLVKKFHGQTVLHGIDLEVKPG	FH(1)GQTVLH(1)GIDLEVK(1)
P37774	20	1	57.785	57.785	H	EVKNLVKKFHGQTVLHGIDLEVKPGEVVAII	FH(1)GQTVLH(1)GIDLEVK(1)
P37903	109	0.774692	5.24846	42.095	H	SPKDRILELAKKIPAHMIIIASHRPDITTYL	K(0.227)IPAH(0.775)MIIIASH(0.859)R(0.14)
P37903	116	0.858641	7.70978	42.095	H	ELAKKIPAHMIIIASHRPDITTYLLGSNAAA	K(0.227)IPAH(0.775)MIIIASH(0.859)R(0.14)
P38521	14	0.999967	44.8202	46.89	H	__MAKNRSRRLRKKMHIDEFQELGFSVAWRF	MH(1)IDEFQELGFSVAWR
P40711	38	0.99689	25.0968	71.888	H	QGAGGQHVNKTSTAIHLRFDIRASSLPEYYK	AQGAGGQH(0.001)VNK(0.999)TSTAIH(0.997)LR(0.003)
P42597	121	0.893681	9.42626	61.593	H	VFRNAPEPFLRMIVVHELAHLKEKEHNKAFY	MIVVH(0.894)ELAH(0.102)LK(0.004)
P45425	78	1	40.0859	40.086	H	STGIIRDGSLLALNPHNLGGLLHFPLVKTLE	DGSLLALNPH(1)NLGGLLH(1)FPLVK(1)
P45425	85	1	40.0859	40.086	H	GSLLALNPHNLGGLLHFPLVKTLEQLTNLPT	DGSLLALNPH(1)NLGGLLH(1)FPLVK(1)
P46122	31	1	55.7342	55.734	H	SLSACVQQSEVRQMKHSVSTLNQEMTQLNQE	H(1)SVSTLNQEMTQLNQETVK(1)
P46890	171	0.814135	6.41497	53.211	H	TRFDNNTQRPIGDLAHHWETSTDGLRWDFYL	PIGDLAH(0.814)H(0.186)WETSTDGLR(1)
P52095	379	0.996353	24.3647	63.426	H	STHKMLAALSQASLIHIKGEYDEEAFNEAFM	MLAALSQASLIH(0.996)IK(0.004)
P52123	155	0.999788	36.7299	58.781	H	PLVIEPFSINDIFKAHLMFASISFFWGKSIM	AH(1)LMFASISFFWGK
P52127	381	1	58.782	58.782	H	LYVEKAGAEKILENVHIVRRDPEGDQLWIGF	ILENVH(1)IVR(1)
P52598	64	0.999893	43.1038	67.214	H	VVLVSGGVQSPGRVAHEPSHQVKTALAMTQK	VAH(1)EPSH(0.959)QVK(0.037)TALAMTQK(0.004)
P52598	68	0.959416	14.2014	67.214	H	SGGVQSPGRVAHEPSHQVKTALAMTQKAAIG	VAH(1)EPSH(0.959)QVK(0.037)TALAMTQK(0.004)
P60390	242	1	51.4359	51.436	H	LNVLAPGGRLSIISFHSLEDRIVKRFMRENS	LSIISFH(1)SLEDR(1)IVK(1)
P63224	175	0.999386	34.1081	65.895	H	IRVPHFGYADRIQEIHIKVIHILIQLIEKEM	IQEIH(0.999)IK(0.997)VIH(0.999)ILIQLIEK(0.002)EMVK(0.002)
P63224	180	0.999386	34.1081	65.895	H	FGYADRIQEIHIKVIHILIQLIEKEMVK___	IQEIH(0.999)IK(0.997)VIH(0.999)ILIQLIEK(0.002)EMVK(0.002)
P67338	10	0.999684	35.0052	70.808	H	______MFAGLPSLTHEQQQKAVERIQELMA	MFAGLPSLTH(1)EQQQK
P71297	64	0.968614	14.8751	87.754	H	SALRKSVACAKLKILHLKQRMQNATNFLARL	LK(0.996)ILH(0.969)LK(0.036)
P75691	274	0.999965	44.5217	56.29	H	KRDGTMTLVGAPATPHKSPEVFNLIMKRRAI	RDGTMTLVGAPATPH(1)K(1)
P75817	159	0.996181	24.1638	50.04	H	SDTKLAQLRKALPWLHEQLPQLKVITVNIQP	K(1)ALPWLH(0.996)EQLPQLK(0.004)
P75908	270	1	59.2647	59.265	H	IEVVSKLTVMVIFMCHIFSALRVTKNIAHRD	LTVMVIFMCH(1)IFSALR(1)
P75948	23	0.999806	37.9359	50.723	H	PITRDELLSRFFPQYHPVTTFNSGLSGGSFL	FFPQYH(1)PVTTFNSGLSGGSFLIEHQGQR
P75974	5	0.989114	19.5986	73.665	H	___________MKTIHDIRRSNARKLRDGVG	K(0.011)TIH(0.989)DIRR
P76180	89	1	40.8441	40.844	H	WLTIAFFKRRRCVPKHYIIWLLISVLLAVKA	R(1)CVPK(1)H(1)YIIWLLISVLLAVK(1)
P77378	79	1	52.1672	52.167	H	TENYAESIAALLKDKHPAMLLLAATKRGKAL	H(1)PAMLLLAATK(1)
P77581	121	0.947992	12.6561	44.252	H	AEANEAALKLARKFAHDRYGSHKSGIVAFKN	FAH(0.948)DR(0.963)YGSH(0.925)K(0.15)SGIVAFK(0.015)
P77581	127	0.924686	11.0038	44.252	H	ALKLARKFAHDRYGSHKSGIVAFKNAFHGRT	FAH(0.948)DR(0.963)YGSH(0.925)K(0.15)SGIVAFK(0.015)
Q2EEQ8	9	0.985197	18.3939	49.418	H	_______MELKKLMEHISITPDYRQAWKVVH	K(0.001)LMEH(0.985)ISITPDYR(0.014)
P0A8V2	1147	0.999998	58.4926	89.561	R	LKQQQEVAKLREFIQRAYDLGADVRQKVDLS	EFIQR(1)AYDLGADVRQK
P0AD01	225	0.998797	28.9837	78.264	R	TSIHYGVTGRPVYRYRIQAEHYSLLKQYCQ_	YR(0.999)IQAEH(0.953)YSLLK(0.048)
P0AE88	11	0.996694	24.7923	69.03	R	_____MNKILLVDDDRELTSLLKELLEMEGF	MNK(0.003)ILLVDDDR(0.997)ELTSLLK(1)
P0AF67	20	0.818462	6.54843	49.188	R	VIPLPDEQATLDLGERVAKACDGATVIYLYG	MMNRVIPLPDEQATLDLGER(0.818)VAK(0.181)
P0AFG8	167	0.995871	25.7338	69.72	R	AFLEGRLTQEQLDNFRQEVHGNGLSSYPHPK	LTQEQLDNFR(0.996)QEVH(0.078)GNGLSSYPH(0.014)PK(0.912)
P14081	236	1	40.1769	40.177	R	LHAQNQPTETANAGQRIALNIAGDAEKEQIN	ALH(1)AQNQPTETANAGQR(1)IALNIAGDAEK(1)
P16916	1370	0.76515	5.13023	89.698	R	KDAKSTQKAWNCRHSRQSNDKKR________	H(0.235)SR(0.765)QSNDKK
P17443	44	0.999948	42.8155	98.048	R	LMAQGWQVRWLGTADRMEADLVPKHGIEIDF	WLGTADR(1)MEADLVPK
P23367	177	0.967974	15.2799	58.781	R	RTEKTEFNHIDEIIRRIALARFDVTINLSHN	R(0.968)IALAR(0.032)FDVTINLSH(0.69)NGK(0.31)
P23538	418	0.999874	39.3435	121.61	R	PIMKKASAIVTNRGGRTCHAAIIARELGIPA	GGR(1)TCHAAIIAR
P25666	279	1	47.559	56.013	R	RCFRSNTLGAKMQALRIFLSRK_________	MQALR(1)IFLSR(1)
P27249	426	1	94.4764	106.68	R	LCNIPEARKLFLSILRHPGAVRRGLLPMHRH	LFLSILR(1)H(1)PGAVR
P27375	170	0.979165	16.5784	65.905	R	KGKSVKFFTIAYNLLRNKQLPQPSK______	SVK(0.052)FFTIAYNLLR(0.979)NK(0.968)
P31119	29	0.949989	12.7911	47.104	R	YRVRVTGDTQALKGERVLITPNHVSFIDGIL	VTGDTQALK(0.054)GER(0.95)VLITPNH(0.995)VSFIDGILLGLFLPVR(0.001)
P31806	367	0.999998	56.2633	58.63	R	WDADALNLLAINPDKRHNRVITPHPGEAARL	R(1)H(1)NR(1)VITPH(1)PGEAAR
P31806	370	0.999998	56.2633	58.63	R	DALNLLAINPDKRHNRVITPHPGEAARLLGC	R(1)H(1)NR(1)VITPH(1)PGEAAR
P46142	265	0.999901	40.0628	71.98	R	EVPIQQKRDFDINEQRRQTFLQSQKLSRKLQ	DFDINEQR(1)R(1)QTFLQSQK
P46142	266	0.999688	35.0572	71.98	R	VPIQQKRDFDINEQRRQTFLQSQKLSRKLQD	DFDINEQR(1)R(1)QTFLQSQK
P60390	247	1	51.4359	51.436	R	PGGRLSIISFHSLEDRIVKRFMRENSRGPQV	LSIISFH(1)SLEDR(1)IVK(1)
P64550	7	0.999933	41.7286	65.252	R	_________MFSPQSRLRHAVADTFAMVVYC	MFSPQSR(1)LR
P76539	20	0.919024	10.5499	66.261	R	VFRQEDFEEVITLWERCDLLRPWNDPEMDIE	VFRQEDFEEVITLWER(0.919)CDLLR(0.081)
P77374	6	0.985775	18.4102	61.213	R	__________MSKNERMVGISRRTLVKSTAI	SK(0.014)NER(0.986)MVGISR
Q47083	204	0.978303	16.555	84.687	R	IAKWPLITYRQGITGRSRIDDAFARKGLLAD	WPLITYRQGITGR(0.978)SR(0.022)

## Sheet: HeLa cells-all sites
Proteins	Positions within proteins	Localization prob	Score diff	Score	Amino acid	Sequence window	Phosphorylation(HKR) Probabilities
Q04695	15	1	170.93	246.75	K	_MTTSIRQFTSSSSIKGSSGLGGGSSRTSCR	QFTSSSSIK(1)GSSGLGGGSSR
Q6DHY5	100	0.995635	25.1838	45.685	K	WEKYKSSRKLIDRAYKGMPMNIRGPMWSVLL	AYK(0.996)GMPMNIR(0.215)GPMWSVLLNIEEMK(0.789)
A0A0C4DH35	84	0.910469	10.1305	71.434	K	GVSWNGSRTHYADSVKGRFIISRDNSRNTLY	GLEWVSGVSWNGSRTH(0.001)YADSVK(0.91)GR(0.088)
A0A0J9YWL9	611	0.965997	14.5511	71.976	K	HQEMVPLGDSNSHSLKKDPVVPQDTAPLMFS	K(0.006)DPMMH(0.992)QEMVPLGDSNSH(0.983)SLK(0.966)K(0.053)
A0FGR8	713	0.575405	1.32821	65.058	K	GSNTAPSTPVIGGSDKPGMEEKAQPPEAGPQ	SH(0.001)MSGSPGPGGSNTAPSTPVIGGSDK(0.575)PGMEEK(0.424)
A0JNW5	417	0.648376	3.80915	62.722	K	MLKQAVKDHNVGSPPKSPTHASPQHTQTEKD	DHNVGSPPK(0.648)SPTH(0.27)ASPQH(0.073)TQTEK(0.002)DYPLK(0.006)
A1X283	286	0.668844	3.68187	59.372	K	PASYLKKNSGEPLPPKPGPGSPSHPGALDLD	K(0.045)NSGEPLPPK(0.669)PGPGSPSH(0.287)PGALDLDGVSR
A4D1E1	1171	1	62.8609	62.861	K	DKYKILQLQAQQHMQKQLLSKHLRVLPAAGP	ILQLQAQQH(1)MQK(1)QLLSK(1)
A6NKT7	1029	0.69211	3.59722	58.462	K	KANTSGDFEKDDDAYKTEDSDDIHFEPVVQM	ANTSGDFEK(0.302)DDDAYK(0.692)TEDSDDIH(0.003)FEPVVQMPEK(0.002)
Q99613	25	0.575474	1.32122	69.625	K	DSESESSLSGEELVTKPVGGNYGKQPLLLSE	FFTTGSDSESESSLSGEELVTK(0.575)PVGGNYGK(0.425)
Q13765	144	0.998862	29.4329	102.5	K	EDLSQQAQLAAAEKFKVQGEAVSNIQENTQT	FK(0.999)VQGEAVSNIQENTQTPTVQEESEEEEVDETGVEVK(0.001)
M0R2J8	434	0.998584	28.5027	66.201	K	ITEKVILSMTAKEHHKEQEEVSRLIDELQTA	EH(0.995)H(0.995)K(0.999)EQEEVSR(0.011)LIDELQTAIK
O00151	87	0.499795	0	130.61	K	GCTDNLTLTVARSEHKVWSPLVTEEGKRHPY	SEHK(0.5)VWSPLVTEEGK(0.5)R
O00151	98	0.499795	0	130.61	K	RSEHKVWSPLVTEEGKRHPYKMNLASEPQEV	SEHK(0.5)VWSPLVTEEGK(0.5)R
O00178	585	0.680871	3.291	127.05	K	ITKLLQTTNNSPMNSKPQQIKMQSTKKGPLT	LLQTTNNSPMNSK(0.681)PQQIK(0.319)
O00273	313	0.992225	21.0592	166.52	K	QQTQSLHSLRSISASKASPPGDLQNPKRARQ	SISASK(0.992)ASPPGDLQNPK(0.008)R
O00308	54	1	79.326	79.326	K	NSYVEVAVDGLPSETKKTGKRIGSSELLWNE	INSYVEVAVDGLPSETK(1)K(1)
O00429	608	0.860556	8.59624	72.009	K	LKTSKAEELLAEEKSKPIPIMPASPQKGHAV	SK(0.861)PIPIMPASPQK(0.119)GH(0.021)AVNLLDVPVPVAR
O00499	346	0.601562	1.79142	125.47	K	SPSQLRKGPPVPPPPKHTPSKEVKQEQILSL	KGPPVPPPPK(0.602)HTPSK(0.398)
O00499	330	0.999908	40.3749	132.8	K	EPEPAGGATPGATLPKSPSQLRKGPPVPPPP	VNHEPEPAGGATPGATLPK(1)SPSQLR
O00559	34	0.999991	50.6302	111.65	K	FSFLKRLICRSGRGRKLSGDQITLPTTVDYS	K(1)LSGDQITLPTTVDYSSVPK
O00567	510	0.915116	10.357	145.73	K	GMEDPSISFSKPKKKKSFSKEELMSSDLEET	K(0.915)SFSK(0.084)EELMSSDLEETAGSTSIPK(0.001)
O00567	514	0.999951	43.1066	123.17	K	PSISFSKPKKKKSFSKEELMSSDLEETAGST	SFSK(1)EELMSSDLEETAGSTSIPK
O00592	526	0.999957	43.7094	108.51	K	PTLEVMETSSEMQEKKVVSLNGELGDSWIVP	K(1)VVSLNGELGDSWIVPLDNLTKDDLDEEEDTHL
O00592	547	0.9611	13.9283	81.001	K	GELGDSWIVPLDNLTKDDLDEEEDTHL____	K(0.039)VVSLNGELGDSWIVPLDNLTK(0.961)DDLDEEEDTHL
O00625	5	0.500054	0	75.387	K	___________MGSSKKVTLSVLSREQSEGV	GSSK(0.5)K(0.5)VTLSVLSR(1)
O00625	6	0.500054	0	75.387	K	__________MGSSKKVTLSVLSREQSEGVG	GSSK(0.5)K(0.5)VTLSVLSR(1)
O00712	318	0.846449	7.41541	287.88	K	WHERDQDMSSPTTMKKPEKPLFSSASPQDSS	K(0.846)PEK(0.153)PLFSSASPQDSSPR
O00712	321	0.756711	4.92807	276.12	K	RDQDMSSPTTMKKPEKPLFSSASPQDSSPRL	K(0.243)PEK(0.757)PLFSSASPQDSSPR
O14497	1938	1	63.7546	134.24	K	TEDGAKSSEAIKESSKFPFGISPAQSHRNIK	ESSK(1)FPFGISPAQSHR
O14497	1603	0.71876	4.07508	94.454	K	PAPLPRPMENRTSPSKSPFLHSGMKMQKAGP	TSPSK(0.719)SPFLHSGMK(0.281)
O14770	197	0.898503	9.47067	81.553	K	KMPIDLVIDERDGSSKSDHEELSGSSTNLAD	DGSSK(0.899)SDH(0.101)EELSGSSTNLADHNPSSWR
O14802	954	0.966911	14.657	89.44	K	ALSKNELILTTESIMKKSEFLCCQDSFLQEI	NELILTTESIMK(0.967)K(0.033)
O14893	79	0.999995	52.9345	59.694	K	PDVVVAQIDPKKLKRKQSVNISLSGCQPAPE	K(1)QSVNISLSGCQPAPEGYSPTLQWQQQQVAQFSTVR
O14974	442	0.997039	25.2725	145.94	K	ERKDESPATWRLGLRKTGSYGALAEITASKE	K(0.997)TGSYGALAEITASK(0.003)
O14974	879	0.783301	5.58075	70.346	K	ENEQEQQSDTEEGSNKKETQTDSISRYETSS	STGVSFWTQDSDENEQEQQSDTEEGSNK(0.783)K(0.217)ETQTDSISR
O15014	794	0.937564	11.7657	102.65	K	DPHQSRLASIKAEADKIYSFTDNAPSPSIGG	AEADK(0.938)IYSFTDNAPSPSIGGSSR(0.062)
O15014	504	0.614675	2.02819	193.54	K	CPSPVLIDCPHPNCNKKYKHINGLKYHQAHA	NCPSPVLIDCPHPNCNK(0.615)K(0.385)
O15027	72	0.999998	56.2387	91.269	K	FSRQALQSTPLGSSSKSSPPVLQGPAPAGFS	QALQSTPLGSSSK(1)SSPPVLQGPAPAGFSQHPGLLVPHTHAR
O15056	1121	1	63.2861	107.92	K	QPPQRPPPPTGLMVKKSASDASISSGTHGQY	K(1)SASDASISSGTHGQYSILQTAR
O15066	596	1	90.075	94.692	K	KLKHLIIENFIPLEEKSKIMNRAFFDEEEDH	HLIIENFIPLEEK(1)SK(1)
O15075	306	1	120.863	164.41	K	SRRSTTKSPGPSRRSKSPASTSSVNGTPGSQ	SK(1)SPASTSSVNGTPGSQLSTPR
O15085	561	0.99297	21.5064	79.845	K	SSQSTFHIPLSPVEVKPGNVRNIIQHFENNQ	SSSQSTFH(0.007)IPLSPVEVK(0.993)PGNVR
O15156	464	0.730446	6.57638	46.278	K	LKGQNCLEVRTRRRRKDDAPPHYPPPSTAAA	K(0.73)DDAPPH(0.099)YPPPSTAAASPAGLDLSNGH(0.161)LDTFR(0.01)
O15164	810	1	91.0387	172.32	K	DNSSNGKSEWLDPSQKSPLHVGETRKEDDPN	SEWLDPSQK(1)SPLHVGETR
O15212	7	0.999999	60.6291	104.22	K	_________MAELIQKKLQGEVEKYQQLQKD	MAELIQK(1)K(1)LQGEVEK
O15212	8	0.999999	61.2747	104.22	K	________MAELIQKKLQGEVEKYQQLQKDL	MAELIQK(1)K(1)LQGEVEK
O15446	21	1	121.105	176.28	K	AGDAARFSCPPNFTAKPPASESPRFSLEALT	FSCPPNFTAK(1)PPASESPR
O15504	111	0.556869	0.992217	97.384	K	GLSENPFASLSPDEQKDEKKLLEGIVKDMEV	EGFGLSENPFASLSPDEQK(0.557)DEK(0.443)
O15541	9	0.988842	19.4755	91.889	K	_______MAEQLSPGKAVDQVCTFLFKKPGR	AEQLSPGK(0.989)AVDQVCTFLFK(0.011)
O43159	169	0.999909	40.3899	95.122	K	TGPKAWKGSTTNDPPKQSPGSTSPKPPHTLS	GSTTNDPPK(1)QSPGSTSPKPPHTLSR
O43159	178	1	108.404	144.4	K	TTNDPPKQSPGSTSPKPPHTLSRKQWRNRQK	QSPGSTSPK(1)PPHTLSR
O43166	1445	0.932636	10.7828	80.816	K	HSASPVVFTSARSSPKEELHPAAPSQLAPSF	H(0.195)SASPVVFTSAR(0.94)SSPK(0.933)EELH(0.933)PAAPSQLAPSFSSSSSSSSGPR
O43166	1273	0.197931	0	53.288	K	GRLMRQDPVVHLSPNKQGHSDSHYSSHSSSN	QDPVVH(0.198)LSPNK(0.198)QGH(0.198)SDSH(0.198)YSSH(0.198)SSSNTLSSNASSAHSDEK(0.01)
O43169	39	0.912942	10.2063	88.101	K	VTYYRLEEVAKRNSLKELWLVIHGRVYDVTR	R(0.087)NSLK(0.913)ELWLVIHGR
O43294	134	0.999371	32.0143	121.24	K	KVASGEQKEDQSEDKKRPSLPSSPSPGLPKA	K(0.999)RPSLPSSPSPGLPK(0.001)
O43294	70	1	123.731	123.76	K	DKDHLYSTVCKPRSPKPAAPAAPPFSSSSGV	SPK(1)PAAPAAPPFSSSSGVLGTGLCELDR
O43353	328	0.947191	12.5796	76.006	K	KLQSVSSAIHLCDKKKMELSLNIPVNHGPQE	K(0.947)MELSLNIPVNH(0.052)GPQEESCGSSQLH(0.001)ENSGSPETSR
O43474	252	0.987345	18.9307	50.224	K	APGSEYGSPSVISVSKGSPDGSHPVVVAPYN	ASLSAPGSEYGSPSVISVSK(0.987)GSPDGSH(0.013)PVVVAPYNGGPPR
O43491	601	0.845089	7.3744	127.3	K	VVQDGDGRREVRSPTKAPHLQLIEGKKNSLR	EVRSPTK(0.845)APHLQLIEGK(0.155)
O43491	611	0.601228	3.38239	132.23	K	VRSPTKAPHLQLIEGKKNSLRVEGDNIYVRH	SPTK(0.276)APHLQLIEGK(0.601)K(0.123)
O43683	564	0.396998	0	66.828	K	GARTFGERSVSRLPSKPKEEVPHAEEFLDDS	LPSK(0.397)PK(0.397)EEVPH(0.206)AEEFLDDSTVWGIR
O43683	566	0.396998	0	66.828	K	RTFGERSVSRLPSKPKEEVPHAEEFLDDSTV	LPSK(0.397)PK(0.397)EEVPH(0.206)AEEFLDDSTVWGIR
O43688	264	0.999998	58.9237	79.163	K	ARPPQHCLKEEELERKPSLSLTLTLGEADHN	K(1)PSLSLTLTLGEADHNHYGYPHSSS
O43815	131	0.999777	36.5176	84.285	K	YHKLKYGTELNQGDMKPPSYDSDEGNETEVQ	YGTELNQGDMK(1)PPSYDSDEGNETEVQPQQNSQLMWK
O43852	37	0.747958	4.80212	70.701	K	TEKKDRVHHEPQLSDKVHNDAQSFDYDHDAF	VH(0.001)H(0.003)EPQLSDK(0.748)VH(0.248)NDAQSFDYDH(0.001)DAFLGAEEAK
O60264	112	1	72.3189	127.59	K	KQTELFAHFIQPAAQKTPTSPLKMKPGRPRI	QTELFAHFIQPAAQK(1)TPTSPLK(1)
O60271	338	0.786969	6.85415	53.522	K	QETRNVSTGSAENEEKSEVQAIIESTPELDM	NVSTGSAENEEK(0.787)SEVQAIIESTPELDMDK(0.051)DLSGYK(0.162)
O60293	643	0.999995	53.2799	73.461	K	LREELLKSLANKRAFKPEETSSNSDPPSPPV	AFK(1)PEETSSNSDPPSPPVLNNSHPVPR
O60308	319	0.626076	2.23844	73.981	K	LPLQPLARSGSPCHQKPMPSLPQLEERGTEN	SGSPCH(0.374)QK(0.626)PMPSLPQLEER
O60318	520	0.904896	10.1669	85.407	K	KKISPNKKPFSLKEKKPGDGEVSPSTEDAPF	K(0.905)PGDGEVSPSTEDAPFQH(0.008)SPLGK(0.087)
O60341	150	1	89.2727	95.293	K	YYSEEERNAKAEKEKKLPPPPPQAPPEEENE	K(1)LPPPPPQAPPEEENESEPEEPSGVEGAAFQSR
O60499	131	0.8093	6.27777	65.155	K	ERNNREILAGKPAAQKSPSDLLDASAVSATS	EILAGK(0.191)PAAQK(0.809)SPSDLLDASAVSATSR
O60508	47	0.997046	27.7695	48.244	K	PAADSLMHLTKSPSSKPSLAVAVDSAPEVAV	SPSSK(0.997)PSLAVAVDSAPEVAVK(0.001)EDLETGVHLDPAVK(0.002)
O60524	768	0.999961	44.3871	59.598	K	EYEEVRKDQDSVGEMKDEGEETLNYPDTTID	DQDSVGEMK(1)DEGEETLNYPDTTIDLSHLQPQR
O60706	1075	0.998952	29.7901	65.5	K	MGLTAAKNLHHNLLNKIILGPIRFFDTTPLG	NLH(1)H(1)NLLNK(0.999)IILGPIR(0.001)
O60832	20	0.995169	23.3115	102.72	K	EVIILPKKHKKKKERKSLPEEDVAEIQHAEE	K(0.995)SLPEEDVAEIQHAEEFLIKPESK(0.005)
O60934	435	0.999473	32.7804	154.13	K	TLAKMRIPNYQLSPTKLPSINKSKDRASQQQ	IPNYQLSPTK(0.999)LPSINK(0.001)
O75044	929	0.333333	0	52.577	K	LDSPQIRKTATAGRSKSFNNHRPMDPEVIAQ	SK(0.333)SFNNH(0.333)R(0.333)PMDPEVIAQDIEATMNSALNELR
O75122	608	0.5	0	87.117	K	NTGSDVEEAVADALKKPARRRYESYGMHSDD	VLNTGSDVEEAVADALK(0.5)K(0.5)PAR
O75128	454	0.898389	9.46789	97.366	K	CSDQDLAGTPDLGPQKSPLWEKNGSENSHLR	DKWATDQEDCSDQDLAGTPDLGPQK(0.898)SPLWEK(0.102)
O75152	764	0.99944	34.0011	152.01	K	QMSMKTRRLSSASTGKPPLSVEDDFEKLIWE	RLSSASTGK(0.999)PPLSVEDDFEK
O75152	114	0.899766	9.53114	78.975	K	KTVLPTVPESPEEEVKASQLSVQQNKLSVQS	TVLPTVPESPEEEVK(0.9)ASQLSVQQNK(0.1)
O75167	558	0.999999	61.6653	137.95	K	EEQEAKMELKRRLSRKLSLRPTVAELQARRI	K(1)LSLRPTVAELQAR
O75182	1011	0.999997	55.6277	79.021	K	GTEGASSSPTEGFLLKPVFLQRNLKKFRRRW	YVEQYVGTEGASSSPTEGFLLK(1)PVFLQR
O75324	57	0.959341	13.7282	58.998	K	SQSEDEESIVGDGETKEPFLLVQYSAKGPCV	ISQSEDEESIVGDGETK(0.959)EPFLLVQYSAK(0.041)
O75367	134	0.972572	15.5545	167.03	K	GSKGKLEAIITPPPAKKAKSPSQKKPVSKKA	GKLEAIITPPPAK(0.973)K(0.027)
O75369	504	0.999253	31.2619	81.379	K	VTMKGPKGLEELVKQKDFLDGVYAFEYYPST	QK(0.999)DFLDGVYAFEYYPSTPGR(0.001)
O75376	2336	0.999763	36.258	94.003	K	VCKPKLISKSNSRKSKSPIPGQGYLGTERPS	SK(1)SPIPGQGYLGTERPSSVSSVHSEGDYHR
O75376	998	0.97994	16.8821	67.353	K	IDLECRSSTSPCGTSKSPNREWEVLQPAPHQ	SSTSPCGTSK(0.98)SPNR(0.998)EWEVLQPAPH(0.022)QVITNLPEGVR
O75420	391	1	65.3464	69.095	K	GPLWGTNGDGDETAEKEPPAAEDDIRGIQLS	SSSPSPLPTLGPLWGTNGDGDETAEK(1)EPPAAEDDIR
O75446	129	1	97.6042	103.05	K	YHKNLIQSVRNRRKRKGSDDDGGDSPVQDID	K(1)GSDDDGGDSPVQDIDTPEVDLYQLQVNTLR
O75475	175	0.99691	25.0872	106	K	EEAGVVTTATASVNLKVSPKRGRPAATEVKI	QVETEEAGVVTTATASVNLK(0.997)VSPK(0.003)
O75528	319	0.550209	0.875183	63.97	K	KPFSVPHTKSLESRIKEELIAQGLLESEDRP	IK(0.55)EELIAQGLLESEDR(0.45)PAEDSEDEVLAELR
O75530	268	0.999941	42.5239	68.536	K	SCGMDHSLKLWRINSKRMMNAIKESYDYNPN	INSK(1)R(1)MMNAIK
O75533	214	1	116.687	222.64	K	RWDQTADQTPGATPKKLSSWDQAETPGHTPS	K(1)LSSWDQAETPGHTPSLR
O75533	430	1	92.9108	140.41	K	LPPPAGYVPIRTPARKLTATPTPLGGMTGFH	K(1)LTATPTPLGGMTGFHMQTEDR
O75533	141	0.999878	39.063	92.39	K	MIISPERLDPFADGGKTPDPKMNARTYMDVM	TMIISPER(0.015)LDPFADGGK(1)TPDPK(0.985)
O75665	662	0.999365	32.0086	71.894	K	KAFRSYHRRVIKNSAKSPLAAKSPPSLHLLE	NSAK(0.999)SPLAAK(0.998)SPPSLHLLEAFK(0.003)
O75665	668	0.997526	26.1459	101.48	K	HRRVIKNSAKSPLAAKSPPSLHLLEAFKNIT	NSAK(0.999)SPLAAK(0.998)SPPSLHLLEAFK(0.003)
O75717	321	0.972709	15.5197	105.98	K	PSGKTSSSKVSSRVEKDYNDLFDGDDMSNAG	VEK(0.973)DYNDLFDGDDMSNAGDFLNDNAVEIPSFSK(0.027)
O75953	35	0.831635	8.06682	85.271	K	IKKAYRKMALKYHPDKNKEPNAEEKFKEIAE	YH(0.13)PDK(0.832)NK(0.039)EPNAEEK
O75969	302	0.672074	0.217393	40.545	K	TYANSVVSDMMVSIMKTLKIQVKDTTIATIL	PDDFTASVSEGIMTYANSVVSDMMVSIMK(0.672)TLK(0.656)IQVK(0.672)
O75970	491	0.526178	0.455168	99.774	K	VTKDADLSPVNASIIKENYEKDEDFLSSTRN	DADLSPVNASIIK(0.526)ENYEK(0.474)DEDFLSSTR
O75970	785	0.767613	5.18931	86.699	K	ALKGAPSGTVRIGVAKPLPLSPEEGYVSAKE	IGVAK(0.768)PLPLSPEEGYVSAK(0.232)
O75970	1582	1	131.511	271.82	K	SQAVPSAAGAASGEKKNSSQSLMVPQSGSPE	K(1)NSSQSLMVPQSGSPEPESIR
O94776	533	0.785038	5.62531	142.19	K	ATIVKDLVAQAPLKPKTPRGTKTPINRNQLS	DLVAQAPLK(0.215)PK(0.785)TPR
O94822	1573	0.481138	0.667378	41.423	K	YHIPHLACSVYHMTLKDLPAMVRLWWNSSEK	ETTMLPYH(0.955)IPH(0.046)LACSVYH(0.413)MTLK(0.481)DLPAMVR(0.105)
O94823	1035	1	64.0782	84.169	K	QYCRSVLCCRSTPLQKSMIVKLVRDKLRVMT	STPLQK(1)SMIVK(0.002)LVR(0.998)
O94826	84	0.612077	2.12753	99.94	K	RGRGDASGLKRNSERKTPEGRASPAPGSGHP	K(0.612)TPEGR(0.375)ASPAPGSGH(0.013)PEGPGAHLDMNSLDR
O94854	754	0.999718	35.5054	76.02	K	FHRNFPEQVFQDLQRKSPESEILSLHLLVEE	K(1)SPESEILSLHLLVEELR
O94876	379	0.905266	9.80272	126.83	K	AVVSKPREIASLIRNKFGSADNIPNLKDSLE	NK(0.905)FGSADNIPNLK(0.095)
O94876	390	0.926109	11.5418	89.866	K	LIRNKFGSADNIPNLKDSLEEGQVDDAGKAL	NK(0.065)FGSADNIPNLK(0.926)DSLEEGQVDDAGK(0.009)
O94880	798	1	67.403	72.25	K	DMEADMAMETLPDGTKRSRRQIKEPVKFVPQ	NSYWQCSECDQAGSSDMEADMAMETLPDGTK(1)R
O94885	323	0.923495	10.8175	73.691	K	SGVHKKPLFFDGSPEKPPEDDSDSLTTSPSS	K(0.077)PLFFDGSPEK(0.923)PPEDDSDSLTTSPSSSSLDTWGAGR
O94964	1314	0.895425	9.32602	115.69	K	GRAPSPTSSAGEEGTKKPEPLSPASYHQPEG	APSPTSSAGEEGTK(0.895)K(0.105)PEPLSPASYHQPEGVAR
O95155	794	0.989745	19.8459	180.1	K	RLRAIRELNRTVEDLKNNESQWKDSPLATRH	TVEDLK(0.99)NNESQWK(0.01)DSPLATR
O95239	818	1	97.2191	103.31	K	TEVRGQVSESEDSITKQIESLETEMEFRSAQ	GQVSESEDSITK(1)QIESLETEMEFR
O95239	1141	0.996495	24.5382	78.043	K	SLGTVERTQDSEGSFKLEDPTEVTPGLSFFN	TQDSEGSFK(0.996)LEDPTEVTPGLSFFNPVCATPNSK(0.004)
O95263	745	0.994921	22.9201	59.732	K	TKHFEHVNKFVNSINKPMAAEIEGSDCECNP	FVNSINK(0.995)PMAAEIEGSDCECNPAGK(0.005)
O95359	2361	0.993094	21.5778	58.342	K	NFNPFSSTSKMQESPKLPQQSYNFDPDTCDE	MQESPK(0.993)LPQQSYNFDPDTCDESVDPFK(0.007)
O95361	73	0.999997	57.2838	65.151	K	QDSDSAEQGDPAGEGKEVLCDFCLDDTRRVK	ETEEQDSDSAEQGDPAGEGK(1)EVLCDFCLDDTRR
O95365	346	0.761722	7.85287	96.135	K	GAAAGDSDEESRADDKGVMDYYLKYFSGAHD	AGAAAGDSDEESR(0.113)ADDK(0.762)GVMDYYLK(0.125)
O95382	960	0.977383	16.4033	133.92	K	FPCPQAPSQHPPSPPKRCLSYGGTSQLRVPE	PSDAPSASPTPSANSTTQSQTFPCPQAPSQH(0.022)PPSPPK(0.977)R
O95470	566	0.999815	37.3311	62.16	K	STDTVTQGSQMNGSPKPH_____________	NMVAELSSVFLDSLYSTDTVTQGSQMNGSPK(1)PH
O95684	159	0.490334	0	68.705	K	TGEGALDLSDVHSPPKSPEGKTSAQTTPSKI	EKGPTTGEGALDLSDVH(0.49)SPPK(0.49)SPEGK(0.019)
O95714	2937	0.999934	41.8185	117.52	K	AVPFLASDNEEEEDEKGNSGSLIRKKAAGLE	IRAEEEDLAAVPFLASDNEEEEDEK(1)GNSGSLIR
O95714	2452	1	90.1818	98.376	K	PVAVQHIRPARVKRRKQSPVPALPIVVQLME	K(1)QSPVPALPIVVQLMEMGFSR
O95718	423	1	69.6504	69.65	K	QHFYSVKLQGKVPMHKLFLEMLEAKV_____	VPMH(1)K(1)LFLEMLEAK(1)V
O95718	432	1	69.6504	69.65	K	GKVPMHKLFLEMLEAKV______________	VPMH(1)K(1)LFLEMLEAK(1)V
O95747	330	0.998638	31.228	144.18	K	AKKVRRVPGSSGRLHKTEDGGWEWSDDEFDE	LH(0.001)K(0.999)TEDGGWEWSDDEFDEESEEGK(0.001)AAISQLR
O95785	987	0.590495	1.59242	105.03	K	FSAKGLGHPPSSPLLKKTPLALAGSPTPKNP	GLGHPPSSPLLK(0.59)K(0.409)
O95785	1139	0.891509	9.14731	103.42	K	EARSPSDLHISPLAKKLPPPPGSPLGHSPTA	K(0.892)LPPPPGSPLGH(0.108)SPTASPPPTAR
O95785	939	0.999998	56.0387	103.75	K	HLGLPPGLAKKSSSLKEVVAGAPRPGLLSLA	SSSLK(1)EVVAGAPRPGLLSLAK
O95810	291	1	103.434	187.63	K	TSNHQKISSGKSSPFKVSPLTFGRKKVREGE	SSPFK(1)VSPLTFGR
O95817	409	0.914045	11.3956	58.929	K	ERAAPSTAPAEATPPKPGEAEAPPKHPGVLK	AAPSTAPAEATPPK(0.914)PGEAEAPPK(0.066)HPGVLK(0.02)
O96013	177	0.865716	8.10544	132.76	K	SSREGSGGPQESSRDKRPLSGPDVGTPQPAG	DK(0.866)RPLSGPDVGTPQPAGLASGAK(0.134)
O96013	473	0.992564	21.254	172.42	K	DFGFCAQVSKEVPRRKSLVGTPYWMAPELIS	R(0.007)K(0.993)SLVGTPYWMAPELISR
O96028	118	0.761175	5.03405	118.71	K	QEMKGIGTPPNTTPIKNGSPEIKLKITKTYM	GIGTPPNTTPIK(0.761)NGSPEIK(0.239)
P00441	92	0.999992	52.4254	102.47	K	DEERHVGDLGNVTADKDGVADVSIEDSVISL	HVGDLGNVTADK(1)DGVADVSIEDSVISLSGDHCIIGR
P01106	52	1	67.2376	111.88	K	QSELQPPAPSEDIWKKFELLPTPPLSPSRRS	K(1)FELLPTPPLSPSR(0.593)R(0.407)
P01266	1981	0.558922	0.845077	79.659	K	TRLPFQKLMGISIRNKVPMSEKSISNGFFEC	LMGISIR(0.464)NK(0.559)VPMSEK(0.977)
P02545	457	0.997621	26.2263	131.42	K	VEEVDEEGKFVRLRNKSNEDQSMGNWQIKRQ	NK(0.998)SNEDQSMGNWQIK(0.002)R
P04150	206	0.999983	47.7643	56.234	K	FDILQDLEFSSGSPGKETNESPWRSDLLIDE	LYTTDQSTFDILQDLEFSSGSPGK(1)ETNESPWR
P06746	81	0.978956	16.6764	127.51	K	GTKIAEKIDEFLATGKLRKLEKIRQDDTSSS	IAEKIDEFLATGK(0.979)LR(0.021)
P08237	656	0.974126	15.7584	85.737	K	FNLYSEEGKGIFDSRKNVLGHMQQGGSPTPF	K(0.974)NVLGH(0.026)MQQGGSPTPFDR
P08651	326	0.59245	1.62471	113.43	K	RNWTEDMEGGISSPVKKTEMDKSPFNSPSPQ	NWTEDMEGGISSPVK(0.592)K(0.408)
P08670	334	1	90.2932	148.41	K	YRRQVQSLTCEVDALKGTNESLERQMREMEE	QVQSLTCEVDALK(1)GTNESLER
P08865	42	0.995277	23.2505	134.18	K	GTNLDFQMEQYIYKRKSDGIYIINLKRTWEK	RK(0.995)SDGIYIINLK(0.005)
P09210	4	0.999599	35.0622	69.03	K	____________MAEKPKLHYSNIRGRMESI	MAEK(1)PK(0.999)LH(0.001)YSNIR
P09210	6	0.999424	33.436	69.03	K	__________MAEKPKLHYSNIRGRMESIRW	MAEK(1)PK(0.999)LH(0.001)YSNIR
P09601	226	0.987596	20.3607	77.838	K	IQLFEELQELLTHDTKDQSPSRAPGLRQRAS	TAFLLNIQLFEELQELLTH(0.009)DTK(0.988)DQSPSR(0.003)
P09651	350	1	114.003	126.56	K	GRSSGPYGGGGQYFAKPRNQGGYGGSSSSSS	SSGPYGGGGQYFAK(1)PR
P09661	179	0.998586	30.9075	114.76	K	GKRGAQLAKDIARRSKTFNPGAGLPTDKKKG	SK(0.999)TFNPGAGLPTDK(0.001)K(0.001)
P0DMV9	361	0.991731	20.7896	59.661	K	VQKLLQDFFNGRDLNKSINPDEAVAYGAAVQ	DLNK(0.992)SINPDEAVAYGAAVQAAILMGDK(0.008)
P11142	328	0.999909	40.4313	110.37	K	TLDPVEKALRDAKLDKSQIHDIVLVGGSTRI	LDK(1)SQIHDIVLVGGSTR
P11388	1385	0.629314	2.49676	64.273	K	KPQKSVVSDLEADDVKGSVPLSSSPPATHFP	SVVSDLEADDVK(0.629)GSVPLSSSPPATH(0.354)FPDETEITNPVPK(0.017)
P11717	2358	0.999999	61.1526	77.649	K	CRRSSNVSYKYSKVNKEEETDENETEWLMEE	VNK(1)EEETDENETEWLMEEIQLPPPR
P11940	312	0.655968	2.80285	107.99	K	YVKNLDDGIDDERLRKEFSPFGTITSAKVMM	K(0.656)EFSPFGTITSAK(0.344)
P12544	123	1	84.2968	100.82	K	PATREGDLKLLQLMEKAKINKYVTILHLPKK	EGDLKLLQLMEK(1)AK(1)
P12694	356	1	125.463	173.51	K	DSSAYRSVDEVNYWDKQDHPISRLRHYLLSQ	SVDEVNYWDK(1)QDHPISR
P13639	438	0.632268	2.35369	134.38	K	TGLKVRIMGPNYTPGKKEDLYLKPIQRTILM	IMGPNYTPGK(0.632)K(0.368)
P14618	3	0.494522	0	75.82	K	_____________MSKPHSEAGTAFIQTQQL	SK(0.495)PH(0.495)SEAGTAFIQTQQLH(0.011)AAMADTFLEHMCR
P14866	302	0.994686	22.723	60.641	K	NPNLSGQGDPGSNPNKRQRQPPLLGDHPAEY	NDQDTWDYTNPNLSGQGDPGSNPNK(0.995)R(0.005)
P14923	662	0.999617	34.1623	198.29	K	AVLFRISEDKNPDYRKRVSVELTNSLFKHDP	K(1)RVSVELTNSLFK
P15260	439	0.999995	53.1275	81.239	K	SLSDSEFPPNNKGEIKTEGQELITVIKAPTS	GEIK(1)TEGQELITVIK
P15822	2674	0.999689	35.7917	186.42	K	STSQPLLKAHSEVFTKPSGQQTLSPDRQVPR	AHSEVFTK(1)PSGQQTLSPDR
P15822	870	0.999942	43.7178	53.522	K	IPPPHPLRGSQSFDDKIGAFYDDVFVSGPNA	GSQSFDDK(1)IGAFYDDVFVSGPNAPVPQSGHPR
P15822	1150	0.584644	1.65269	86.006	K	VIQHTNSLSRPNSFDKPEPFERASPVSFQEL	HGTGISVIQH(0.016)TNSLSR(0.4)PNSFDK(0.585)PEPFER
P15880	263	0.964112	14.2922	83.137	K	YSYLTPDLWKETVFTKSPYQEFTDHLVKTHT	ETVFTK(0.964)SPYQEFTDHLVK(0.036)
P15880	76	0.839597	7.18857	108.72	K	MPVTKLGRLVKDMKIKSLEEIYLFSLPIKES	IK(0.84)SLEEIYLFSLPIK(0.16)
P16070	695	0.712056	4.10517	129.36	K	KKLVINSGNGAVEDRKPSGLNGEASKSQEMV	K(0.712)PSGLNGEASK(0.277)SQEMVH(0.01)LVNK(0.002)
P16070	705	0.992857	21.8484	147.64	K	AVEDRKPSGLNGEASKSQEMVHLVNKESSET	K(0.006)PSGLNGEASK(0.993)SQEMVHLVNK(0.001)
P16070	715	0.954303	13.1993	65.155	K	NGEASKSQEMVHLVNKESSETPDQFMTADET	SQEMVH(0.046)LVNK(0.954)ESSETPDQFMTADETR
P16402	17	0.568404	1.19579	96.561	K	SETAPLAPTIPAPAEKTPVKKKAKKAGATAG	SETAPLAPTIPAPAEK(0.568)TPVK(0.432)
P17096	31	0.996958	24.577	116.87	K	QEKDGTEKRGRGRPRKQPPVSPGTALVGSQK	K(0.997)QPPVSPGTALVGSQK(0.127)EPSEVPTPK(0.876)
P17544	406	0.999953	43.2822	119.7	K	LLLAHKDCPVTALQKKTQGYLESPKESSEPT	K(1)TQGYLESPK(1)ESSEPTGSPAPVIQHSSATAPSNGLSVR
P17544	415	0.999956	43.5835	95.507	K	VTALQKKTQGYLESPKESSEPTGSPAPVIQH	TQGYLESPK(1)ESSEPTGSPAPVIQHSSATAPSNGLSVR
P17706	290	0.750103	6.3503	140.75	K	GAKCIKGDSSIQKRWKELSKEDLSPAFDHSP	WK(0.75)ELSK(0.073)EDLSPAFDH(0.003)SPNK(0.174)
P17812	584	1	160.456	169.06	K	DRSGSSSPDSEITELKFPSINHD________	SGSSSPDSEITELK(1)FPSINHD
P18206	720	0.839035	9.83775	80.41	K	NVEKMTGLVDEAIDTKSLLDASEEAIKKDLD	MTGLVDEAIDTK(0.839)SLLDASEEAIK(0.087)K(0.074)
P18206	731	0.39208	0.313126	66.825	K	AIDTKSLLDASEEAIKKDLDKCKVAMANIQP	MTGLVDEAIDTK(0.243)SLLDASEEAIK(0.392)K(0.365)
P18206	326	1	77.599	85.496	K	ELCAGKERREILGTCKMLGQMTDQVADLRAR	R(1)EILGTCK(1)MLGQMTDQVADLR
P18583	2125	0.758737	5.24992	102.21	K	KQIAQSKEDDDVIVNKPHVSDEEEEEPPFYH	QIAQSK(0.014)EDDDVIVNK(0.759)PH(0.227)VSDEEEEEPPFYHHPFK
P18583	157	1	71.8791	150.14	K	SHDDGNIDLESDSFLKFDSEPSAVALELPTR	SHDDGNIDLESDSFLK(1)FDSEPSAVALELPTR
P18858	54	0.999842	41.0217	115.26	K	LKEWNGVVSESDSPVKRPGRKAARVLGSEGE	EWNGVVSESDSPVK(1)RPGR
P18858	82	0.997247	25.5682	52.381	K	EGEEEDEALSPAKGQKPALDCSQVSPPRPAT	GQK(0.997)PALDCSQVSPPR(0.995)PATSPENNASLSDTSPMDSSPSGIPK(0.008)
P19022	802	0.999665	34.7444	64.645	K	LSQLQQPDTVEPDAIKPVGIRRMDERPIHAE	YDEEGGGEEDQDYDLSQLQQPDTVEPDAIK(1)PVGIR
P19484	116	0.99762	26.9143	82.367	K	GNKFAAHISPAQGSPKPPPAASPGVRAGHVL	FAAH(0.002)ISPAQGSPK(0.998)PPPAASPGVR
P19525	80	1	71.2477	72.035	K	NAAAKLAVEILNKEKKAVSPLLLTTTNSSEG	K(1)AVSPLLLTTTNSSEGLSMGNYIGLINR
P19634	690	0.999041	30.1771	162.76	K	QLEQKINNYLTVPAHKLDSPTMSRARIGSDP	INNYLTVPAH(0.001)K(0.999)LDSPTMSR
P19838	935	0.980924	17.1115	91.065	K	DSDSVCDSGVETSFRKLSFTESLTSGASLLT	K(0.981)LSFTESLTSGASLLTLNK(0.019)
P20020	19	0.99998	47.0661	110.77	K	MANNSVAYSGVKNSLKEANHDGDFGITLAEL	NSLK(1)EANHDGDFGITLAELR
P20020	1185	0.975305	15.8886	61.116	K	DAPTKRNSSPPPSPNKNNNAVDSGIHLTIEM	NSSPPPSPNK(0.975)NNNAVDSGIH(0.042)LTIEMNK(0.983)
P20042	63	0.859108	8.65723	178.03	K	PTEDKDLEADEEDTRKKDASDDLDDLNFFNQ	K(0.859)K(0.117)DASDDLDDLNFFNQK(0.024)
P20810	565	0.999816	37.3425	103.71	K	TTQAGAPPRDTSQSDKDLDDALDKLSDSLGQ	DTSQSDK(1)DLDDALDKLSDSLGQR
P21580	643	0.999816	37.3495	166.7	K	FIEYRENKHFAAASGKVSPTASRFQNTIPCL	HFAAASGK(1)VSPTASR
P21796	109	0.651491	2.71694	217.2	K	GLKLTFDSSFSPNTGKKNAKIKTGYKREHIN	LTFDSSFSPNTGK(0.651)K(0.349)
P22234	30	0.84527	8.02813	148.18	K	EGKTKEVYELLDSPGKVLLQSKDQITAGNAA	TK(0.022)EVYELLDSPGK(0.845)VLLQSK(0.133)
P22314	18	0.948237	13.1346	80.554	K	SSPLSKKRRVSGPDPKPGSNCSPAQSVLSEV	R(0.046)VSGPDPK(0.948)PGSNCSPAQSVLSEVPSVPTNGMAK(0.006)
P23246	232	0.693028	3.79697	84.159	K	KPGGGPGLSTPGGHPKPPHRGGGEPRGGRQH	MPGGPK(0.289)PGGGPGLSTPGGH(0.018)PK(0.693)PPHR
P23396	202	0.94276	14.2696	108.28	K	KIMLPWDPTGKIGPKKPLPDHVSIVEPKDEI	K(0.943)PLPDHVSIVEPK(0.035)DEILPTTPISEQK(0.022)
P23443	450	1	95.4647	115.09	K	PRRFIGSPRTPVSPVKFSPGDFWGRGASAST	TPVSPVK(1)FSPGDFWGR
P23497	366	0.99989	39.6185	70.264	K	EPVINNDNPLESNDEKEGQEATCSRPQIVPE	SEPVINNDNPLESNDEK(1)EGQEATCSRPQIVPEPMDFR
P23588	113	0.999999	61.9603	64.592	K	AFLGNLPYDVTEESIKEFFRGLNISAVRLPR	SPPYTAFLGNLPYDVTEESIK(1)EFFR
P24534	7	0.999887	39.4626	104.49	K	_________MGFGDLKSPAGLQVLNDYLADK	GFGDLK(1)SPAGLQVLNDYLADK
P25054	993	0.879424	8.65248	66.825	K	QMKPSIESYSEDDESKFCSYGQYPADLAHKI	GQMK(0.001)PSIESYSEDDESK(0.879)FCSYGQYPADLAHK(0.12)
P25054	1777	0.967995	14.8066	203.2	K	KNQLDGKKKKPTSPVKPIPQNTEYRTRVRKN	K(0.032)PTSPVK(0.968)PIPQNTEYR
P25054	1370	0.998042	27.0737	108.96	K	SSGAKSPSKSGAQTPKSPPEHYVQETPLMFS	SGAQTPK(0.998)SPPEH(0.002)YVQETPLMFSR
P25440	282	1	54.1058	85.274	K	APPAQPLAKKKGVKRKADTTTPTPTAILAPG	K(1)ADTTTPTPTAILAPGSPASPPGSLEPK(1)
P25490	351	0.563723	1.18809	100.07	K	ESSKLKRHQLVHTGEKPFQCTFEGCGKRFSL	H(0.001)QLVH(0.429)TGEK(0.564)PFQCTFEGCGK(0.006)
P25490	230	0.708832	3.86401	125.73	K	LEGEFSVTMWSSDEKKDIDHETVVEEQIIGE	K(0.709)DIDHETVVEEQIIGENSPPDYSEYMTGK(0.291)
P26358	130	0.915111	10.3262	290.37	K	SEARRVGMADANSPPKPLSKPRTPRRSKSDG	VGMADANSPPK(0.915)PLSK(0.085)PR
P26373	136	0.691195	3.49916	85.537	K	RSKLILFPRKPSAPKKGDSSAEELKLATQLT	K(0.691)GDSSAEELK(0.309)LATQLTGPVMPVR
P27816	361	0.999936	41.9616	237.59	K	KDVTLLKETERASPIKMDLAPSKDMGPPKEN	ETERASPIK(1)MDLAPSK
P27816	80	0.510527	2.15988	59.525	K	KPCSETSQIEDTPSSKPTLLANGGHGVEGSD	K(0.31)PCSETSQIEDTPSSK(0.511)PTLLANGGH(0.16)GVEGSDTTGSPTEFLEEK(0.019)
P28290	648	0.946516	12.479	84.404	K	TVELLREASAESDVGKSSESEFTQYTTHHIL	EASAESDVGK(0.947)SSESEFTQYTTHHILK(0.053)
P28290	464	0.980666	19.5778	62.183	K	APLTIPSIRNIMTQQKDSFEMEEVQSTEGEA	NIMTQQK(0.981)DSFEMEEVQSTEGEAPH(0.009)VPATYQLGLTK(0.011)
P28290	445	0.973599	15.6676	118.96	K	ENSSELKSVHISTPEKEPCAPLTIPSIRNIM	SVH(0.026)ISTPEK(0.974)EPCAPLTIPSIR
P28370	115	0.999994	51.96	147.56	K	KQTELFAHFIQPSAQKSPTSPLNMKLGRPRI	QTELFAHFIQPSAQK(1)SPTSPLNMK(1)
P29966	172	0.668191	3.04012	149.23	K	RFSFKKSFKLSGFSFKKNKKEAGEGGEAEAP	LSGFSFK(0.668)K(0.332)
P31944	199	1	65.7703	78.692	K	GSCFIQTLVDVFTKRKGHILELLTEVTRRMA	K(1)GH(1)ILELLTEVTR
P32455	155	0.999999	58.3976	60.093	K	DQLYYVTELTHRIRSKSSPDENENEVEDSAD	SK(1)SSPDENENEVEDSADFVSFFPDFVWTLR
P33981	434	0.998361	27.8479	140.27	K	EQKHTTFEQPVFSVSKQSPPISTSKWFDPKS	HTTFEQPVFSVSK(0.998)QSPPISTSK(0.002)
P33981	392	0.499991	0	80.844	K	PEVPESNQKQWQSKRKSECINQNPAASSNHW	R(0.5)K(0.5)SECINQNPAASSNHWQIPELAR
P35222	672	1	78.3312	186.76	K	AVLFRMSEDKPQDYKKRLSVELTSSLFRTEP	K(1)RLSVELTSSLFR
P35251	153	0.999999	59.3761	66.294	K	TSNMKKNEENTKTKNKPLSPIKLTPTSVLDY	NK(1)PLSPIK(1)LTPTSVLDYFGTGSVQR
P35251	159	0.999997	55.5417	134.09	K	NEENTKTKNKPLSPIKLTPTSVLDYFGTGSV	NK(1)PLSPIK(1)LTPTSVLDYFGTGSVQR
P35579	1145	1	64.6653	106.12	K	AEKQKRDLGEELEALKTELEDTLDSTAAQQE	DLGEELEALK(1)TELEDTLDSTAAQQELR
P35606	856	0.999992	53.5807	193.31	K	DFQPSRSTAQQELDGKPASPTPVIVASHTAN	STAQQELDGK(1)PASPTPVIVASHTANKEEK
P35658	665	1	70.4974	140.27	K	RSAQGSSSPVPSMVQKSPRITPPAAKPGSPQ	SAQGSSSPVPSMVQK(1)SPR
P38159	86	0.986763	18.7251	213.99	K	GKSLDGKAIKVEQATKPSFESGRRGPPPPPR	AIK(0.013)VEQATK(0.987)PSFESGR
P38159	63	1	171.187	207.4	K	SRGFAFVTFESPADAKDAARDMNGKSLDGKA	GFAFVTFESPADAK(1)DAAR
P38405	280	1	67.2136	67.214	K	NNRWLRTISIILFLNKQDMLAEKVLAGKSKI	TISIILFLNK(1)QDMLAEK(1)
P38432	496	1	178.386	224.55	K	LLELTSSYSPDVSDYKEGRILSHNPETQQVD	LLELTSSYSPDVSDYK(1)EGR
P38646	173	0.979048	16.6959	97.203	K	GKLYSPSQIGAFVLMKMKETAENYLGHTAKN	LYSPSQIGAFVLMK(0.979)MK(0.021)
P38919	152	1	81.0063	187.16	K	CHACIGGTNVGEDIRKLDYGQHVVAGTPGRV	K(1)LDYGQHVVAGTPGR
P39880	1266	0.999982	47.4654	136.27	K	LAPEEKEALKRAYQQKPYPSPKTIEDLATQL	AYQQK(1)PYPSPK
P40939	759	0.601682	1.7914	151.38	K	FTPCQLLADHANSPNKKFYQ___________	QFTPCQLLADHANSPNK(0.602)K(0.398)
P41182	391	0.841868	7.61561	64.069	K	KKYKFIVLNSLNQNAKPEGPEQAELGRLSPR	FIVLNSLNQNAK(0.842)PEGPEQAELGR(0.146)LSPR(0.012)
P41227	179	0.999981	47.1035	94.384	K	LKEKGRHVVLGAIENKVESKGNSPPSSGEAC	HVVLGAIENK(1)VESK(1)GNSPPSSGEACR
P41227	183	0.999981	47.1035	94.384	K	GRHVVLGAIENKVESKGNSPPSSGEACREEK	HVVLGAIENK(1)VESK(1)GNSPPSSGEACR
P42345	2469	0.538472	0.669674	62.364	K	SVEILDGVELGEPAHKKTGTTVPESIHSFIG	TDSYSAGQSVEILDGVELGEPAHK(0.538)K(0.462)
P42568	486	0.737374	5.91896	190.18	K	LKTNNNQILEVKSPIKQSKSDKQIKNGECDK	TNNNQILEVK(0.189)SPIK(0.737)QSK(0.074)
P42684	630	0.99958	33.7656	125.41	K	QASSGSPALPRKQRDKSPSSLLEDAKETCFT	DK(1)SPSSLLEDAKETCFTR
P42695	1462	0.998053	27.0971	64.377	K	GRSQGNDILCLSLPDKPPPQPQQWNVRSPAR	SQGNDILCLSLPDK(0.998)PPPQPQQWNVR(0.002)
P43307	266	0.999985	48.3346	84.713	K	VDMSWIPQETLNQINKASPRRLPRKRAQKRS	VEMGTSSQNDVDMSWIPQETLNQINK(1)ASPR
P45880	120	0.647415	2.63918	253.16	K	GLKLTFDTTFSPNTGKKSGKIKSSYKRECIN	LTFDTTFSPNTGK(0.647)K(0.353)
P46013	697	0.873929	10.8101	84.641	K	QRSMNKRQRRPATPKKPVGEVHSQFSTGHAN	K(0.874)PVGEVHSQFSTGH(0.073)ANSPCTIIIGK(0.054)
P46013	1337	0.995132	25.2069	103.88	K	LTENLTGSKRRPQTPKEEAQALEDLTGFKEL	R(0.003)PQTPK(0.995)EEAQALEDLTGFK(0.002)
P46060	413	1	51.2797	51.28	K	PQQRGQGEKSATPSRKILDPNTGEPAPVLSS	K(1)ILDPNTGEPAPVLSSPPPADVSTFLAFPSPEK(1)
P46087	735	0.635029	3.58626	142.58	K	PKGTDTQTPAVLSPSKTQATLKPKDHHQPLG	GTDTQTPAVLSPSK(0.635)TQATLK(0.087)PK(0.278)
P46087	741	0.366883	0	142.58	K	QTPAVLSPSKTQATLKPKDHHQPLGRAKGVE	GTDTQTPAVLSPSK(0.367)TQATLK(0.367)PK(0.266)
P46100	2003	0.996381	24.3995	71.159	K	ATSSSNPSSPAPDWYKDFVTDADAEVLEHSG	ATSSSNPSSPAPDWYK(0.996)DFVTDADAEVLEHSGK(0.004)
P46100	2233	0.999996	54.1935	97.957	K	PNSEKKKKRDTPMLPKDTILAELLQIHKEHI	DTPMLPK(1)DTILAELLQIHK
P46100	1530	0.960625	13.8733	186.94	K	EKLREVIEIEDASPTKCPITTKLVLDEDEET	LREVIEIEDASPTK(0.961)CPITTK(0.039)
P46100	601	0.945381	13.4771	73.994	K	LYVKLTPVSLSNSPIKGADCQEVPQDKDGYK	LTPVSLSNSPIK(0.945)GADCQEVPQDK(0.042)DGYK(0.012)
P46821	1250	1	51.5681	72.158	K	TTLDIKDSISAVSSEKVSPSKSPSLSPSPPS	DSISAVSSEK(1)VSPSK(1)SPSLSPSPPSPLEK(1)
P46821	1255	1	96.4668	106.1	K	KDSISAVSSEKVSPSKSPSLSPSPPSPLEKT	VSPSK(1)SPSLSPSPPSPLEK(1)
P46821	1217	0.999996	54.366	67.496	K	ASASTISPPSSMEEDKFSRSALRDAYCSEVK	DYNASASTISPPSSMEEDK(1)FSR
P46821	1496	0.999991	53.2817	140.81	K	VEAMSSQPALALDERKLGDVSPTQIDVSQFG	K(1)LGDVSPTQIDVSQFGSFKEDTK
P46821	2273	0.75422	4.97339	152.67	K	VKKSDGKSKPLAASPKPAGLKESSDKVSRVA	SK(0.006)PLAASPK(0.754)PAGLK(0.24)
P46821	838	0.924957	11.5362	66.401	K	LEAERSLMSSPEDLTKDFEELKAEEVDVTKD	SLMSSPEDLTK(0.925)DFEELK(0.01)AEEVDVTK(0.065)
P46821	844	0.375849	0.0929799	86.304	K	LMSSPEDLTKDFEELKAEEVDVTKDIKPQLE	SLMSSPEDLTK(0.368)DFEELK(0.376)AEEVDVTK(0.256)
P46821	1198	0.996414	24.4461	57.477	K	LNGFSEGSKTDATDGKDYNASASTISPPSSM	TDATDGK(0.996)DYNASASTISPPSSMEEDK(0.004)FSR
P46821	1874	0.971025	15.6521	73.603	K	DSGGKTPGDFSYAYQKPEETTRSPDEEDYDY	TPGDFSYAYQK(0.971)PEETTR(0.026)SPDEEDYDYESYEK(0.003)
P46821	2070	0.5	0	141.72	K	STYSYETSDLCYTAEKKSPSEARQDVDLCLV	TPQASTYSYETSDLCYTAEK(0.5)K(0.5)SPSEAR
P46821	2071	0.794672	5.87739	236.18	K	TYSYETSDLCYTAEKKSPSEARQDVDLCLVS	TPQASTYSYETSDLCYTAEK(0.205)K(0.795)SPSEAR
P46821	1777	1	104.703	191.4	K	YASLTSEKVQSLEGEKLSPKSDISPLTPRES	VQSLEGEK(1)LSPK(1)SDISPLTPR
P46821	1781	1	120	191.4	K	TSEKVQSLEGEKLSPKSDISPLTPRESSPLY	VQSLEGEK(1)LSPK(1)SDISPLTPR
P47712	445	0.499982	0	84.226	K	VSNDSSDSDDESHEPKGTENEDAGSDYQSDN	HIVSNDSSDSDDESH(0.5)EPK(0.5)GTENEDAGSDYQSDNQASWIHR
P47736	483	1	96.6669	173.59	K	PDLAKAAGISLIVPGKSPTRKKSGPFGSRRS	AAGISLIVPGK(1)SPTR
P48651	414	1	89.7775	119.25	K	LYGMIWYAEHYGHREKTYSECEDGTYSPEIS	EK(1)TYSECEDGTYSPEISWHHR
P48681	911	0.997724	26.4219	113.65	K	GAWNLENLRSPEEVDKESQRNLEEEENLGKG	SLGAWNLENLR(0.002)SPEEVDK(0.998)ESQR
P49006	106	1	100.333	139.98	K	KFSFKKPFKLSGLSFKRNRKEGGGDSSASSP	LSGLSFK(1)R
P49023	329	0.99979	36.7695	90.78	K	AQGKTGSSSPPGGPPKPGSQLDSMLGSLQSD	TGSSSPPGGPPK(1)PGSQLDSMLGSLQSDLNK
P49327	2206	1	73.1408	86.08	K	SSKADEASELACPTPKEDGLAQQQTQLNLRS	ADEASELACPTPK(1)EDGLAQQQTQLNLR
P49454	3029	0.991594	20.7172	87.793	K	RLAAQKLALSPLSLGKENLAESSKPTAGGSR	LALSPLSLGK(0.992)ENLAESSK(0.008)PTAGGSR
P49585	341	1	112.985	147.75	K	RERSPSPSFRWPFSGKTSPPCSPANLSRHKA	WPFSGK(1)TSPPCSPANLSR
P49711	690	0.999692	35.1099	42.709	K	DQNTGAIENIIVEVKKEPDAEPAEGEEEEAQ	K(1)EPDAEPAEGEEEEAQPAATDAPNGDLTPEMILSMMDR
P49756	688	0.513384	0.23257	80.293	K	GASNSPGQPNSVKRKKLPVDSVFNKFEDEDS	K(0.513)LPVDSVFNK(0.487)FEDEDSDDVPR
P49756	697	1	98.7717	110.32	K	NSVKRKKLPVDSVFNKFEDEDSDDVPRKRKL	LPVDSVFNK(1)FEDEDSDDVPR
P49760	141	0.99996	44.0867	124.2	K	RTFSRSSSQHSSRRAKSVEDDAEGHLIYHVG	AK(1)SVEDDAEGHLIYHVGDWLQER
P49790	613	0.984954	18.1599	92.943	K	RPAEILKEGSVLDILKSPGFASPKIDSVAAQ	EGSVLDILK(0.985)SPGFASPK(0.015)
P49790	228	0.987764	19.0703	206.64	K	ERSHSLSQHTATSSKKPAFNLSAFGTLSPSL	K(0.988)PAFNLSAFGTLSPSLGNSSILK(0.012)
P49790	384	0.999985	48.1505	115.29	K	TPKPVSIATNRSVYFKPSLTPSGEFRKTNQR	SVYFK(1)PSLTPSGEFRK
P49792	1415	0.999018	30.0767	94.717	K	SPENVQDRFALVTPKKEGHWDCSICLVRNEP	K(0.999)EGH(0.001)WDCSICLVR
P49792	2621	0.499946	0	75.764	K	SINYTFKTPEKAKEKKKPEDSPSDDDVLIVY	K(0.5)K(0.5)PEDSPSDDDVLIVYELTPTAEQK
P49792	2622	0.499946	0	75.764	K	INYTFKTPEKAKEKKKPEDSPSDDDVLIVYE	K(0.5)K(0.5)PEDSPSDDDVLIVYELTPTAEQK
P49916	232	0.813945	6.40952	102.97	K	FVTSTNPRKFSGFSAKPNNSGEAPSSPTPKR	FSGFSAK(0.814)PNNSGEAPSSPTPK(0.186)
P49916	213	1	161.729	190.37	K	VQAKLTTTGQVTSPVKGASFVTSTNPRKFSG	LTTTGQVTSPVK(1)GASFVTSTNPR
P50552	321	1	86.5664	87.958	K	VRRPWEKNSTTLPRMKSSSSVTTSETQPCTP	MK(1)SSSSVTTSETQPCTPSSSDYSDLQR
P50851	977	0.998587	28.565	119.97	K	RRDINVSVGSQQPDTKDSPVCPHFTTNGNEN	DINVSVGSQQPDTK(0.999)DSPVCPH(0.001)FTTNGNENSSIEK
P50851	1732	0.961595	13.986	61.214	K	VQFRSFDRSVIVAAKKSAVSPSTFNTSIPTN	K(0.962)SAVSPSTFNTSIPTNAVSVVSSVDSAQASDMGGESPGSR(0.038)
P50851	1259	1	114.301	130.66	K	LDVSNVATDTERLELKASPNVEAPQPHRHVL	LELK(1)ASPNVEAPQPHR
P51114	470	0.997575	28.5276	47.373	K	RGGPRGGKSSISSVLKDPDSNPYSLLDNTES	SSISSVLK(0.998)DPDSNPYSLLDNTESDQTADTDASESH(0.001)H(0.001)STNR
P51397	42	0.98808	19.1875	124.31	K	VQKHPHTGDTKEEKDKDDQEWESPSPPKPTV	DK(0.988)DDQEWESPSPPK(0.012)PTVFISGVIAR
P51397	54	0.995413	23.7091	154.95	K	EKDKDDQEWESPSPPKPTVFISGVIARGDKD	DK(0.004)DDQEWESPSPPK(0.995)PTVFISGVIAR
P51531	333	0.999761	36.2213	91.091	K	VLQLQQKQSRISPIQKPQGLDPVEILQEREY	QSRISPIQK(1)PQGLDPVEILQER
P51532	1450	0.999947	43.5347	226.67	K	DESKKQKKRGRPPAEKLSPNPPNLTKKMKKI	GRPPAEK(1)LSPNPPNLTK
P51610	665	0.991894	20.8767	108.23	K	VTTVVGGVTKTITLVKSPISVPGGSALISNL	TITLVK(0.992)SPISVPGGSALISNLGK(0.008)
P51812	224	1	140.083	190.55	K	LTDFGLSKEAIDHEKKAYSFCGTVEYMAPEV	K(1)AYSFCGTVEYMAPEVVNR
P51812	367	1	97.3859	142.4	K	EDTFYFDPEFTAKTPKDSPGIPPSANAHQLF	TPK(1)DSPGIPPSANAHQLFR
P51825	690	0.480188	0.690039	91.151	K	SLPAPSKALSGPEPAKDNVEDRTPEHFALVP	ALSGPEPAK(0.48)DNVEDR(0.11)TPEH(0.41)FALVPLTESQGPPHSGSGSR
P52594	175	0.998292	27.4984	87.363	K	LKSLLGDSAPTLHLNKGTPSQSPVVGRSQGQ	SLLGDSAPTLH(0.04)LNK(0.998)GTPSQSPVVGR(0.962)
P52701	13	0.869419	8.2335	106.79	K	___MSRQSTLYSFFPKSPALSDANKASARAS	QSTLYSFFPK(0.869)SPALSDANK(0.131)
P52732	246	0.848797	7.54138	50.851	K	YSSRSHSVFSVTIHMKETTIDGEELVKIGKL	SH(0.987)SVFSVTIH(0.916)MK(0.849)ETTIDGEELVK(0.218)IGK(0.031)
P52799	258	0.957399	14.7858	122.44	K	ITLVVLLLKYRRRHRKHSPQHTTTLSLSTLA	K(0.957)HSPQH(0.011)TTTLSLSTLATPK(0.032)
P52948	551	1	79.635	155.86	K	TNPAAQKALTTPTHYKLTPRPATRVRPKALQ	ALTTPTHYK(1)LTPR
P52948	838	0.996157	24.1368	139	K	LDGVWPTDKTSRCLIKSPDRLADINYEGRLE	CLIK(0.996)SPDR(0.004)LADINYEGR
P52948	925	1	69.5472	94.349	K	PPASQTTPLQMALNGKPAPPPQSQSPEVEQL	TAPLPPASQTTPLQMALNGK(1)PAPPPQSQSPEVEQLGR
P53350	208	0.830553	6.90334	149.19	K	GDFGLATKVEYDGERKKTLCGTPNYIAPEVL	K(0.831)K(0.169)TLCGTPNYIAPEVLSK
P53367	34	0.49678	0	57.432	K	GEVDDSREHSFNRDLKHSLPSGLGLSETQIT	DLK(0.497)H(0.497)SLPSGLGLSETQITSHGFDNTK(0.006)
P53396	471	1	89.5722	153.05	K	FSESRADEVAPAKKAKPAMPQDSVPSPRSLQ	AK(1)PAMPQDSVPSPR
P54132	138	0.996655	24.7414	68.444	K	QNTPTVKKSRDTALKKLEFSSSPDSLSTIND	K(0.997)LEFSSSPDSLSTINDWDDMDDFDTSETSK(0.003)
P54259	658	1	123.952	195.1	K	APSPGAYKTATPPGYKPGSPPSFRTGTPPGY	TATPPGYK(1)PGSPPSFR
P54687	360	1	58.4895	58.49	K	YKGETIHIPTMENGPKLASRILSKLTDIQYG	GETIH(1)IPTMENGPK(1)LASR(1)ILSK(1)
P55011	252	0.994495	22.581	85.191	K	KLLRPSLAELHDELEKEPFEDGFANGEESTP	LLRPSLAELHDELEK(0.994)EPFEDGFANGEESTPTR(0.005)
P55199	291	0.941377	12.0569	76.533	K	YSEGDQQLLKRVLVRKLCQPQSTGSLLGDPA	K(0.941)LCQPQSTGSLLGDPAASSPPGER(0.059)
P55201	136	0.853763	7.6628	70.291	K	EDEEAPEEAPENGSNKENTETPAATPKSGKH	ISIFDNLDVVSEDEEAPEEAPENGSNK(0.854)ENTETPAATPK(0.146)
P55265	613	0.925142	10.9202	81.151	K	ESQTPTPSATSFFSGKSPVTTLLECMHKLGN	TAESQTPTPSATSFFSGK(0.925)SPVTTLLECMHK(0.075)
P55327	175	0.999829	40.4046	110.64	K	VITKKLEDVKNSPTFKSFEEKVENLKSKVGG	NSPTFK(1)SFEEKVENLK
P55327	180	0.48716	0.628188	136.57	K	LEDVKNSPTFKSFEEKVENLKSKVGGTKPAG	NSPTFK(0.422)SFEEK(0.487)VENLK(0.091)
P55809	173	0.779801	5.49168	50.2	K	PTGYGTLVQEGGSPIKYNKDGSVAIASKPRE	AGGAGVPAFYTPTGYGTLVQEGGSPIK(0.78)YNK(0.22)
P56182	68	1	77.7105	83.064	K	LKVWKGLFYCMWMQDKPLLQEELGRTISQLV	GLFYCMWMQDK(1)PLLQEELGR
P56192	827	0.999644	36.1294	93.546	K	SLRQRFGGGQAKTSPKPAVVETVTTAKPQQI	TSPK(1)PAVVETVTTAKPQQIQALMDEVTK
P56524	649	1	125.551	139.78	K	PASATFPVSVQEPPTKPRFTTGLVYDTLMLK	AQSSPASATFPVSVQEPPTK(1)PR
P56589	197	0.999996	53.6533	73.057	K	VIKQAVQKVLGSVSLKHSLSLLDLEQKLKEI	VLGSVSLK(1)H(1)SLSLLDLEQK(0.159)LK(0.841)
P57678	619	0.939746	11.9307	73.688	K	VSCLKETVWMKFSTPKEEKQFLELLNCLMSP	FSTPK(0.94)EEK(0.06)QFLELLNCLMSPVK
P57740	85	1	166.484	221.59	K	LLRQPDISCILGTGGKSPRLTQSSGFFGNLS	QPDISCILGTGGK(1)SPR
P60174	19	0.999986	48.5809	231.58	K	SRKFFVGGNWKMNGRKQSLGELIGTLNAAKV	K(1)QSLGELIGTLNAAK
P61011	81	0.333333	0	90.793	K	ASGLNKRKMIQHAVFKELVKLVDPGVKAWTP	MIQH(0.333)AVFK(0.333)ELVK(0.333)LVDPGVK(1)
P61011	85	0.333333	0	90.793	K	NKRKMIQHAVFKELVKLVDPGVKAWTPTKGK	MIQH(0.333)AVFK(0.333)ELVK(0.333)LVDPGVK(1)
P61106	193	0.999995	53.2779	93.073	K	DGSLDLNAAESGVQHKPSAPQGGRLTSEPQP	IYQNIQDGSLDLNAAESGVQHK(1)PSAPQGGR
P61106	171	0.99105	22.9172	52.777	K	KTGENVEDAFLEAAKKIYQNIQDGSLDLNAA	K(0.991)IYQNIQDGSLDLNAAESGVQH(0.005)K(0.004)PSAPQGGR
P61978	219	1	184.839	294.52	K	ECIKIILDLISESPIKGRAQPYDPNFYDETY	IILDLISESPIK(1)GR
P61978	103	0.962403	14.082	91.336	K	LSISADIETIGEILKKIIPTLEEGLQLPSPT	K(0.962)IIPTLEEGLQLPSPTATSQLPLESDAVECLNYQHYK(0.038)
P62258	215	1	74.8797	118.76	K	DDAIAELDTLSEESYKDSTLIMQLLRDNLTL	AAFDDAIAELDTLSEESYK(1)DSTLIMQLLR
P62316	18	0.494572	0	60.481	K	LLNKPKSEMTPEELQKREEEEFNTGPLSVLT	SEMTPEELQK(0.495)R(0.495)EEEEFNTGPLSVLTQSVK(0.011)
P62899	101	1	64.0127	124.66	K	VRLSRKRNEDEDSPNKLYTLVTYVPVTTFKN	NEDEDSPNK(1)LYTLVTYVPVTTFK
P63104	212	0.999998	56.8944	76.838	K	DEAIAELDTLSEESYKDSTLIMQLLRDNLTL	TAFDEAIAELDTLSEESYK(1)DSTLIMQLLR
P67870	208	0.97118	15.277	111.25	K	HPMAYQLQLQAASNFKSPVKTIR________	IHPMAYQLQLQAASNFK(0.971)SPVK(0.029)
P68104	5	0.880121	6.59907	58.123	K	___________MGKEKTHINIVVIGHVDSGK	MGK(0.481)EK(0.88)TH(0.627)INIVVIGHVDSGK(0.012)
P78347	827	0.999991	50.3843	64.096	K	ETAIKESTSSKSPPRKINSSPNVNTTASGVE	K(1)INSSPNVNTTASGVEDLNIIQVTIPDDDNER
P78527	4023	0.999985	48.2551	101.56	K	EPSFDWKNFEQKMLKKGGSWIQEINVAEKNW	K(1)GGSWIQEINVAEK
P78549	75	0.73056	4.33193	76.002	K	KAQRLRVAYEGSDSEKGEGAEPLKVPVWEPQ	VAYEGSDSEK(0.731)GEGAEPLK(0.269)VPVWEPQDWQQQLVNIR
P78559	1206	0.884425	8.84584	69.674	K	PEDTQSLSLSEESPSKETSLDVSSKQLSPES	DRWPEVSPEDTQSLSLSEESPSK(0.884)ETSLDVSSK(0.115)
P78559	1287	0.753994	4.88438	83.467	K	RYSAQTDITDDSLDRKSPASSFSHSTPSGNG	YSAQTDITDDSLDR(0.245)K(0.754)SPASSFSHSTPSGNGK(0.001)
P83916	137	0.987098	18.8371	97.452	K	IIGATDSSGELMFLMKWKDSDEADLVLAKEA	IIGATDSSGELMFLMK(0.987)WK(0.013)
P85037	301	0.999994	52.388	74.284	K	AASEQQADTSGGDSPKDESKPPFSYAQLIVQ	AASEQQADTSGGDSPK(1)DESK(1)PPFSYAQLIVQAISSAQDR
P85037	305	0.999994	52.388	74.284	K	QQADTSGGDSPKDESKPPFSYAQLIVQAISS	AASEQQADTSGGDSPK(1)DESK(1)PPFSYAQLIVQAISSAQDR
P86397	151	1	67.6487	116.25	K	FIAIIAVSCSVIESKKTVMEGWVKVMVPEAS	K(1)TVMEGWVK
P98082	670	0.998972	29.8769	116.09	K	FKDFQLRQPPAVPARKGEQTSSGTLSAFASY	K(0.999)GEQTSSGTLSAFASYFNSK(0.001)
P98082	404	0.565001	1.13561	83.891	K	FSVKSSPNPFVGSPPKGLSIQNGVKQDLESS	SSPNPFVGSPPK(0.565)GLSIQNGVK(0.435)
Q00536	143	1	131.381	157.5	K	EGYLEKLTLNSPIFDKPLSRRLRRVSLSEIG	LTLNSPIFDK(1)PLSR
Q00839	270	0.980607	17.9234	65.587	K	RGYFEYIEENKYSRAKSPQPPVEEEDEHFDD	AK(0.981)SPQPPVEEEDEH(0.016)FDDTVVCLDTYNCDLHFK(0.004)
Q01082	2344	1	66.8761	124.25	K	LPTSVVTITSESSPGKREKDKEKDKEKRFSL	AQTLPTSVVTITSESSPGK(1)R
Q01082	2123	0.999982	47.3585	68.934	K	KVSEEAESQQQWDTSKGEQVSQNGLPAEQGS	VSEEAESQQQWDTSK(1)GEQVSQNGLPAEQGSPR
Q01518	304	0.987615	19.0013	155.26	K	QSGPVRSGPKPFSAPKPQTSPSPKRATKKEP	PFSAPK(0.988)PQTSPSPK(0.996)R(0.016)
Q01518	298	0.757085	2.28465	91.889	K	NPALKAQSGPVRSGPKPFSAPKPQTSPSPKR	SGPK(0.757)PFSAPK(0.589)PQTSPSPK(0.654)
Q01664	126	0.999997	55.9891	143.55	K	TQLKRFIQELSGSSPKRRRAEDKDEGIGSPD	FIQELSGSSPK(1)R
Q01850	148	0.937943	12.0582	88.565	K	VEELKSSGQGRRSPGKCDQEKPAPSFACLKE	SPGK(0.938)CDQEK(0.058)PAPSFACLK(0.004)
Q02078	254	0.999995	52.9963	72.676	K	IGATGANSLGKVMPTKSPPPPGGGNLGMNSR	VMPTK(1)SPPPPGGGNLGMNSR
Q02241	899	1	87.4257	130.47	K	RGGGQSVQFTDIETLKQESPNGSRKRRSSTV	GGGQSVQFTDIETLK(1)QESPNGSR
Q02241	16	0.960645	13.8756	147.1	K	MKSARAKTPRKPTVKKGSQTNLKDPVGVYCR	K(0.961)GSQTNLK(0.039)DPVGVYCR
Q02447	551	0.999999	63.2542	86.793	K	LHPGENADSPADIRIKEEEPDPEEWQLSGDS	IK(1)EEEPDPEEWQLSGDSTLNTNDLTHLR
Q02543	56	0.952165	12.9897	128.95	K	KSRFWYFVSQLKKMKKSSGEIVYCGQVFEKS	K(0.952)SSGEIVYCGQVFEK(0.048)SPLR
Q02543	70	1	174.273	251.87	K	KKSSGEIVYCGQVFEKSPLRVKNFGIWLRYD	SSGEIVYCGQVFEK(1)SPLR
Q02750	168	1	82.483	82.483	K	QVLKKAGRIPEQILGKVSIAVIKGLTYLREK	IPEQILGK(1)VSIAVIK(1)
Q02790	108	0.8901	9.18302	67.478	K	AIATMKVGEVCHITCKPEYAYGSAGSPPKIP	VGEVCH(0.002)ITCK(0.89)PEYAYGSAGSPPK(0.107)
Q02880	1574	1	104.397	133.31	K	NPGRKTSKTTSKKPKKTSFDQDSDVDIFPSD	K(1)TSFDQDSDVDIFPSDFPTEPPSLPR
Q02880	1463	0.987094	18.8358	171.13	K	FSFPSYSQKSEDDSAKFDSNEEDSASVFSPS	SEDDSAK(0.987)FDSNEEDSASVFSPSFGLK(0.013)
Q02880	1398	0.999995	55.9841	90.211	K	DDDDDDNNDLEELKVKASPITNDGEDEFVPS	VK(1)ASPITNDGEDEFVPSDGLDKDEYTFSPGK
Q02952	376	0.844145	8.25767	44.099	K	PAESAHEPRLSAEYEKVELPSEEQVSGSQGP	LSAEYEK(0.844)VELPSEEQVSGSQGPSEEK(0.126)PAPLATEVFDEK(0.03)
Q03112	622	0.370701	0	125.73	K	SDKEKFKENGKMFKDKVSPLQNLASINNKKE	DK(0.371)VSPLQNLASINNK(0.371)K(0.259)
Q03112	635	0.370701	0	125.73	K	KDKVSPLQNLASINNKKEYSNHSIFSPSLEE	DK(0.371)VSPLQNLASINNK(0.371)K(0.259)
Q03112	65	1	91.3014	92.428	K	ATSSEAFTPKEGSPYKAPIYIPDDIPIPAEF	EGSPYK(1)APIYIPDDIPIPAEFELR
Q03135	5	0.999999	60.1195	119.69	K	___________MSGGKYVDSEGHLYTVPIRE	SGGK(1)YVDSEGHLYTVPIR
Q03188	297	0.960472	13.8562	120.13	K	HAATAPPHSCPPDDTKLIEDEFIIDESDQSF	HAATAPPH(0.04)SCPPDDTK(0.96)LIEDEFIIDESDQSFASR
Q04323	208	0.998264	28.0041	93.175	K	EPGPVPSSPSQEPPTKREYDQCRIQVRLPDG	K(0.002)YGGSVGSQPPPVAPEPGPVPSSPSQEPPTK(0.998)R
Q04637	1234	0.984814	20.6821	128.66	K	DAVKREAALPPVSPLKAALSEEELEKKSKAI	EAALPPVSPLK(0.985)AALSEEELEK(0.008)K(0.007)
Q05209	564	0.850327	8.91483	96.842	K	DLSEGNSSDINYQTRKTVSLTPSPTTQVETP	K(0.85)TVSLTPSPTTQVETPDLVDH(0.041)DNTSPLFR(0.109)
Q05655	649	0.9921	22.1972	88.708	K	DQEFLNEKARLSYSDKNLIDSMDQSAFAGFS	AR(0.006)LSYSDK(0.992)NLIDSMDQSAFAGFSFVNPK(0.002)
Q07020	132	1	69.011	92.664	K	GGKILTFDQLALDSPKGCGTVLLSGPRKGRE	ILTFDQLALDSPK(1)GCGTVLLSGPR
Q07157	348	0.998854	30.2903	93.812	K	PSNGSLRSRDEERISKPGAVSTPVKHADDHT	ISK(0.999)PGAVSTPVK(0.001)HADDHTPK
Q07157	1370	0.934718	12.6575	58.382	K	YRKQLSYFDRRSFENKPPAHIAASHLSEPAK	SFENK(0.935)PPAH(0.051)IAASH(0.007)LSEPAK(0.006)PAH(0.001)SQNQSNFSSYSSK
Q08AD1	486	0.818286	6.53618	58.08	K	NNSHVSKHIRKNLSFKPINGEEEAESIEEEL	NLSFK(0.818)PINGEEEAESIEEELNIDSHSDLK(0.182)
Q09666	4985	0.789324	5.73639	157.78	K	VKIPKFKKPKFGFGAKSPKADIKSPSLDVTV	FGFGAK(0.789)SPK(0.211)
Q09666	4515	0.779618	5.64775	91.166	K	GKLKGPKFKMPDVHFKSPQISMSDIDLNLKG	MPDVH(0.212)FK(0.78)SPQISMSDIDLNLK(0.004)GPK(0.004)
Q09666	5847	0.994788	23.8711	173.77	K	SKGHYEVTGSDDETGKLQGSGVSLASKKSRL	SK(0.001)GHYEVTGSDDETGK(0.995)LQGSGVSLASK(0.004)
Q09666	2396	0.922181	10.7377	126.56	K	FKAPKISMPDLDLHLKSPKAKGEVDVDVPKL	ISMPDLDLHLK(0.922)SPK(0.078)
Q09666	5098	0.588626	1.55603	108.66	K	TMFGKMYFPDVEFDIKSPKFKAEAPLPSPKL	MYFPDVEFDIK(0.589)SPK(0.411)
Q09666	5833	0.737626	6.61246	153.57	K	GKLKFGTFGGLGSKSKGHYEVTGSDDETGKL	SK(0.738)GH(0.001)YEVTGSDDETGK(0.161)LQGSGVSLASK(0.101)
Q09666	489	0.965564	16.5957	146.69	K	IATGGLEGKMKGTKVKTPEMIIQKPKISMQD	VK(0.966)TPEMIIQK(0.021)PK(0.013)
Q12774	1174	0.99997	45.2481	104.59	K	VRNSTVLLSMTHEDQKLQEVKFELIVSEASY	NSTVLLSMTH(1)EDQK(1)LQEVK
Q12789	1636	1	99.6941	180.56	K	DLDEGVGGKRRSMEVKPAQASHTNYLLMRGY	SMEVK(1)PAQASHTNYLLMR
Q12830	1669	0.943014	12.1875	56.476	K	VNQVEDMEIETSEVKKVTSSPITSEEESNLS	K(0.943)VTSSPITSEEESNLSNDFIDENGLPINK(0.057)
Q12837	9	0.936198	15.1019	47.808	K	_______MMMMSLNSKQAFSMPHGGSLHVEP	MMMMSLNSK(0.936)QAFSMPH(0.037)GGSLH(0.002)VEPK(0.025)
Q12857	324	0.543021	0.753586	97.352	K	GWHEVEPGMPSPTTLKKSEKSGFSSPSPSQT	SPGSGSQSSGWHEVEPGMPSPTTLK(0.543)K(0.457)
Q12872	912	0.99901	30.0406	145.7	K	SRGSSQERSRGVSQEKEAQISSAIVSSVQSK	GVSQEK(0.999)EAQISSAIVSSVQSK(0.001)
Q12872	278	0.998895	32.2239	67.388	K	GRYTVLAENKSDEKKKSGVSSDNEDDDDEED	K(0.999)SGVSSDNEDDDDEEDGNYLH(0.001)PSLFASK(0.001)
Q12888	293	0.866195	8.11143	114.88	K	QLSAQELMESGLQIQKSPEPEVLSTQEDLFD	EQLSAQELMESGLQIQK(0.866)SPEPEVLSTQEDLFDQSNK(0.134)
Q12888	1434	1	65.1184	109.05	K	PLGIEDISPNLSPDDKSFSRVVPRVPDSTRR	ETAVPGPLGIEDISPNLSPDDK(1)SFSR
Q12888	1074	0.761375	7.53061	125.15	K	RGNLLHFPSSQGEEEKEKLEGDHTIRQSQQP	GNLLH(0.134)FPSSQGEEEK(0.761)EK(0.103)LEGDHTIR(0.001)
Q12888	1076	0.488787	0	125.15	K	NLLHFPSSQGEEEKEKLEGDHTIRQSQQPMK	GNLLH(0.022)FPSSQGEEEK(0.489)EK(0.489)LEGDHTIR
Q12888	1205	0.999942	42.9081	98.258	K	GKQDATVQTERGSGEKPVSAPGDDTESLHSQ	GSGEK(1)PVSAPGDDTESLH(1)SQGEEEFDMPQPPHGHVLHR
Q12888	1685	0.78631	5.65874	75.957	K	LITSEEERSPAKRGRKSATVKPGAVGAGEFV	K(0.786)SATVK(0.214)PGAVGAGEFVSPCESGDNTGEPSALEEQR
Q12888	1009	1	65.8607	85.184	K	PETEASEESLQFNLEKPATGERKNGSTAVAE	LVSPETEASEESLQFNLEK(1)PATGER
Q12888	990	0.987489	18.9724	106.72	K	SGAAPDVDDKLCLRMKLVSPETEASEESLQF	MK(0.987)LVSPETEASEESLQFNLEK(0.013)PATGER
Q12888	1091	0.993511	22.0946	165.78	K	KLEGDHTIRQSQQPMKPISPVKDPVSPASQK	QSQQPMK(0.994)PISPVK(0.006)DPVSPASQK
Q12888	1097	0.986454	18.8539	185.96	K	TIRQSQQPMKPISPVKDPVSPASQKMVIQGP	QSQQPMK(0.001)PISPVK(0.986)DPVSPASQK(0.013)
Q12888	780	0.999976	46.1227	52.069	K	SPRVDVSCEPLEGVEKCSDSQSWEDIAPEIE	VDVSCEPLEGVEK(1)CSDSQSWEDIAPEIEPCAENR
Q12893	326	0.523862	0.637238	48.405	K	EEESGAKVDSPLPSDKAPTPPGKGAAPESSL	VEDQSIWPSMDDDEEESGAK(0.024)VDSPLPSDK(0.524)APTPPGK(0.452)
Q12906	489	0.998797	29.1935	53.687	K	RDSSKGEDSAEETEAKPAVVAPAPVVEAVST	GEDSAEETEAK(0.999)PAVVAPAPVVEAVSTPSAAFPSDATAEQGPILTK(0.001)
Q12923	2191	1	91.3133	91.313	K	DELAVLPVVKVLPSGKYTGANLKSVIRVLRG	VLPSGK(1)YTGANLK(1)SVIR(1)
Q12923	2198	1	91.3133	91.313	K	VVKVLPSGKYTGANLKSVIRVLRGLLDQGIP	VLPSGK(1)YTGANLK(1)SVIR(1)
Q12996	697	1	90.8842	179.55	K	KAVKRPNEDSDEDEEKGAVVPPVHDIYRARQ	RPNEDSDEDEEK(1)GAVVPPVHDIYR
Q13029	1257	0.793199	5.83831	98.657	K	VEHMQSLPEDPLETSKEEEELNDSSEELYTT	AHVEHMQSLPEDPLETSK(0.793)EEEELNDSSEELYTTIK(0.207)
Q13033	231	0.602564	1.80736	124.47	K	ETKNLEQILNGGESPKQKGQEIKRSSGDVLE	NLEQILNGGESPK(0.603)QK(0.397)
Q13085	1279	0.861061	7.92417	63.77	K	PTFPEAGHTSLYDEDKVPRDEPIHILNVAIK	IFDEVMGCFSDSPPQSPTFPEAGH(0.139)TSLYDEDK(0.861)VPR
Q13098	467	0.541563	0.87852	70.15	K	AMMLRAAVLRNQIHVKSPPREGSQGELTPAN	NQIH(0.016)VK(0.542)SPPR(0.442)EGSQGELTPANSQSR
Q13112	457	0.91355	10.6438	60.343	K	APTVIRDPPSITPAVKSPLPGPSEEKTLQPS	QAPAPTVIR(0.008)DPPSITPAVK(0.914)SPLPGPSEEK(0.079)
Q13144	551	1	73.864	90.017	K	EEPDSRGGSPQMDDIKVFQNEVLGTLQRGKE	GGSPQMDDIK(1)VFQNEVLGTLQR
Q13177	147	0.83392	7.00806	136.43	K	SNTVKQKYLSFTPPEKDGFPSGTPALNAKGT	YLSFTPPEK(0.834)DGFPSGTPALNAK(0.166)
Q13188	399	0.381072	0.749906	73.649	K	TSPQVQRPSFMDYFDKQDFKNKSHENCNQNM	NATSPQVQR(0.298)PSFMDYFDK(0.381)QDFK(0.321)
Q13309	43	0.999805	37.2126	118.93	K	KTSELLSGMGVSALEKEEPDSENIPQELLSN	TSELLSGMGVSALEK(1)EEPDSENIPQELLSNLGHPESPPR
Q13330	582	1	101.059	134.06	K	KVAPVINNGSPTILGKRSYEQHNGVDGNMKK	VAPVINNGSPTILGK(1)R
Q13416	229	0.796341	5.92196	137.46	K	QNRVVSAPVGKETPSKRMKRDKTSDLVEEYF	VVSAPVGK(0.204)ETPSK(0.796)R
Q13428	308	0.991889	21.1472	103.41	K	ASEKILQVRAASAPAKGTPGKGATPAPPGKA	AASAPAK(0.992)GTPGK(0.008)GATPAPPGK
Q13428	159	0.65552	2.79422	100.33	K	TGKTVANLLSGKSPRKSAEPSANTTLVSETE	K(0.656)SAEPSANTTLVSETEEEGSVPAFGAAAK(0.344)
Q13428	507	0.992926	21.4725	107.09	K	MNAAQVKPLGKSPQVKPASTMGMGPLGKGAG	SPQVK(0.993)PASTMGMGPLGK(0.007)
Q13428	155	1	96.3587	246.51	K	PHPATGKTVANLLSGKSPRKSAEPSANTTLV	TVANLLSGK(1)SPR
Q13435	770	0.947352	12.5516	163.62	K	PAGMETPELIELRKKKIEEAMDGSETPQLFT	K(0.947)IEEAMDGSETPQLFTVLPEK(0.053)R
Q13492	349	0.746494	4.81305	85.994	K	RLKALKEQRLKELAKKPHTSLTTAASPVSTS	K(0.746)PH(0.246)TSLTTAASPVSTSAGGIMTAPAIDIFSTPSSSNSTSK(0.007)
Q13501	295	1	77.8215	85.881	K	EKSSSQPSSCCSDPSKPGGNVEGATQSLAEQ	SSSQPSSCCSDPSK(1)PGGNVEGATQSLAEQMR
Q13535	829	1	73.9837	73.984	K	EDPDKDVRVAFSGNIKHILESLDSEDGFIKE	VAFSGNIK(1)H(1)ILESLDSEDGFIK(1)
Q13541	69	0.999989	51.6092	129.34	K	YDRKFLMECRNSPVTKTPPRDLPTIPGVTSP	NSPVTK(1)TPPR(1)DLPTIPGVTSPSSDEPPMEASQSHLR
Q13547	403	0.999982	47.7896	102.94	K	AIPEESGDEDEDDPDKRISICSSDKRIACEE	MLPHAPGVQMQAIPEDAIPEESGDEDEDDPDK(1)R
Q13615	730	0.965614	17.2173	79.408	K	QEGKEDPLLEKESRRKTPEASAIGLHQDPEL	R(0.016)K(0.966)TPEASAIGLH(0.018)QDPELGDAALR
Q13621	956	1	83.8829	83.883	K	LRIYVGGKINRIEEEKIVMASLLSKFRIKFA	IEEEK(1)IVMASLLSK(1)
Q13625	573	0.989215	20.4743	43.818	K	SIPSVGQDQTLSPGSKQESPPAAAVRPFTPQ	VLLSPSIPSVGQDQTLSPGSK(0.989)QESPPAAAVR(0.002)PFTPQPSK(0.009)
Q13813	969	0.973248	15.6086	96.341	K	QSCRQQVAPTDDETGKELVLALYDYQEKSPR	QQVAPTDDETGK(0.973)ELVLALYDYQEK(0.027)SPR
Q13838	36	1	80.252	96.371	K	AAGGDGAEAPAKKDVKGSYVSIHSSGFRDFL	DVK(1)GSYVSIHSSGFR
Q14004	1154	0.979782	16.8539	62.696	K	GEKQTDPSTPQQESSKPLGGIQPSSQTIQPK	QTDPSTPQQESSK(0.98)PLGGIQPSSQTIQPK(0.02)
Q14155	256	0.990975	20.6491	171.26	K	VKASEKPVSPKSGTLKSPPKGFDTTAINKSY	SGTLK(0.991)SPPK(0.009)GFDTTAINK
Q14157	420	1	144.897	217.19	K	DLKNPSDSAVHSPFTKRQAFTPSSTMMEVFL	NPSDSAVHSPFTK(1)R
Q14590	373	0.781345	5.31065	50.869	K	QSSHLYAHLPIHTGEKPYRCDSCGKGFSRST	PYTCHECGKSFNQSSH(0.002)LYAH(0.006)LPIH(0.273)TGEK(0.781)PYR(0.938)
Q14596	940	0.999985	48.103	50.426	K	FEMGFCDRQLNLRLLKKHNYNILQVVTELLQ	LLK(1)K(1)H(1)NYNILQVVTELLQLNNNDWYSQR
Q14596	941	0.999985	48.103	50.426	K	EMGFCDRQLNLRLLKKHNYNILQVVTELLQL	LLK(1)K(1)H(1)NYNILQVVTELLQLNNNDWYSQR
Q14596	601	0.759836	4.97583	49.356	K	TPCMSPLPHDSPLIEKPGLGQIEEENEGAGF	VPH(0.251)NTPVDVTPCMSPLPH(0.978)DSPLIEK(0.76)PGLGQIEEENEGAGFK(0.011)
Q14677	297	0.999222	31.4025	139.63	K	SKTIDLGAAAHYTGDKASPDQNASTHTPQSS	TIDLGAAAH(0.001)YTGDK(0.999)ASPDQNASTHTPQSSVK
Q14680	476	0.984319	18.1478	107.65	K	PNRYTTPSKARNQCLKETPIKIPVNSTGTDK	NQCLK(0.984)ETPIK(0.015)IPVNSTGTDK(0.001)
Q14680	481	0.471909	0	82.177	K	TPSKARNQCLKETPIKIPVNSTGTDKLMTGV	NQCLK(0.472)ETPIK(0.472)IPVNSTGTDK(0.056)
Q14684	330	0.997477	25.9691	135.28	K	NTPHFNRKRLSKLIKKFQDLSEGSSISQLSF	K(0.997)FQDLSEGSSISQLSFAEDISADEDDQILSQGK(0.003)
Q14694	350	0.850529	8.84522	76.891	K	PVSQPKSWASLFHDSKPSSSSPVAYVETKYS	SWASLFH(0.032)DSK(0.851)PSSSSPVAYVETK(0.111)YSPPAISPLVSEK(0.006)
Q14694	363	0.996891	26.0078	93.956	K	DSKPSSSSPVAYVETKYSPPAISPLVSEKQV	SWASLFHDSKPSSSSPVAYVETK(0.997)YSPPAISPLVSEK(0.002)
Q14738	572	0.999945	42.6233	137.81	K	QMLKDIKKEKVLLRRKSELPQDVYTIKALEA	RK(1)SELPQDVYTIK
Q14739	116	0.999953	43.2797	136.02	K	SHQADIKEARREVEVKLTPLILKPFGNSISR	EVEVK(1)LTPLILKPFGNSISR
Q14814	250	1	84.5448	120.71	K	LPVANGNSLNKVIPAKSPPPPTHSTQLGAPS	VIPAK(1)SPPPPTHSTQLGAPSR
Q14839	1528	0.995613	23.5425	69.456	K	NGRWSMPELAEVEENKKMSQPGSPSPKTPTP	WSMPELAEVEENK(0.996)K(0.996)MSQPGSPSPK(0.008)
Q14839	1529	0.996241	24.2133	69.456	K	GRWSMPELAEVEENKKMSQPGSPSPKTPTPS	WSMPELAEVEENK(0.996)K(0.996)MSQPGSPSPK(0.008)
Q14978	695	1	90.2292	111.81	K	GSYRGGSISVQVNSIKFDSE___________	GGSISVQVNSIK(1)FDSE
Q14980	1223	1	122.6	133.92	K	EWKAQVARGRQEAERKNSLISSLEEEVSILN	K(1)NSLISSLEEEVSILNR
Q14980	1766	1	76.6927	107.69	K	VPGEPASPISQRLPPKVESLESLYFTPIPAR	LPPK(1)VESLESLYFTPIPAR
Q14C86	953	0.511851	0.206824	59.152	K	TSLVAAPHSSSSSPSKDSSRGETEERKDSDD	ELPPAAAIGATSLVAAPH(0.488)SSSSSPSK(0.512)DSSR
Q14C86	781	1	66.3599	76.678	K	SVVSGISATSEDIPNKIEDLRSECSSDFGGK	EVSSR(1)PSTPGLSVVSGISATSEDIPNK(1)IEDLR
Q14C86	474	0.561353	1.07121	126.75	K	PYNTPQLSPATTPANKKNRLPIATRSRSRTN	SSSLEMTPYNTPQLSPATTPANK(0.561)K(0.439)
Q15003	41	0.996728	24.8374	108.69	K	ASSPSERVFPMPLPRKAPLNIPGTPVLEDFP	K(0.997)APLNIPGTPVLEDFPQNDDEK(0.003)ER
Q15003	424	1	77.1615	93.776	K	LGDGDIRTMCPLLSMKPGEYSYFSPRTMSMW	TMCPLLSMK(1)PGEYSYFSPR
Q15019	225	0.999343	31.8245	184.22	K	IYHLPDAESDEDEDFKEQTRLLKASIPFSVV	IYH(0.001)LPDAESDEDEDFK(0.999)EQTR
Q15047	1069	1	76.5635	148.85	K	VTESSRNYGYNPSPVKPEGLRRPPSKTSMHQ	NYGYNPSPVK(1)PEGLR
Q15057	515	0.950341	13.8963	102.47	K	EAYIRAKYVERKFVDKYSISLSPPEQQKKFV	FVDK(0.95)YSISLSPPEQQK(0.011)K(0.039)
Q15057	527	0.58781	1.5414	105.95	K	FVDKYSISLSPPEQQKKFVSKSSEEKRLSIS	YSISLSPPEQQK(0.588)K(0.412)
Q15154	1181	0.540016	0.696654	78.098	K	LAQNSSGKTEYMAFPKPFESSSSIGAEKPRN	TEYMAFPK(0.54)PFESSSSIGAEK(0.46)PR
Q15154	996	0.999016	32.8115	102.79	K	QENLRWVSELSYVEEKEQWQEQINQLKKQLD	WVSELSYVEEK(0.999)EQWQEQINQLK(0.001)K
Q15185	107	1	89.5704	118.51	K	ERAKLNWLSVDFNNWKDWEDDSDEDMSNFDR	LNWLSVDFNNWK(1)DWEDDSDEDMSNFDR
Q15276	23	1	68.9173	89.301	K	SQPDVSLQQRVAELEKINAEFLRAQQQLEQE	VAELEK(1)INAEFLR
Q15311	37	1	142.761	167.61	K	SGLTRTPSSEEISPTKFPGLYRTGEPSPPHD	TPSSEEISPTK(1)FPGLYR
Q15361	879	0.999841	38.0021	78.618	K	DIFYYEDDSEGEDIEKESEGQAPCMAHACNS	DIFYYEDDSEGEDIEK(1)ESEGQAPCMAHACNSSTLGGQGR
Q15366	185	1	112.228	129	K	LSQSPPKGVTIPYRPKPSSSPVIFAGGQDRY	PK(1)PSSSPVIFAGGQDR
Q15418	361	1	97.7746	155.2	K	DDTFYFDTEFTSRTPKDSPGIPPSAGAHQLF	TPK(1)DSPGIPPSAGAHQLFR
Q15424	607	0.646769	2.6269	161.19	K	RKSASREKRSVVSFDKVKEPRKSRDSESHSR	RSVVSFDK(0.647)VK(0.353)
Q15434	22	0.466705	0.615537	86.016	K	SRPGISTFGYNRNNKKPYVSLAQQMAPPSPS	NNK(0.128)K(0.467)PYVSLAQQMAPPSPSNSTPNSSSGSNGNDQLSK(0.405)
Q15545	260	0.620874	2.41253	57.068	K	NIIDTEEDLERQLQDKLNESDEQHQENEGTN	QLQDK(0.621)LNESDEQH(0.356)QENEGTNQLVMGIQK(0.023)
Q15545	190	0.999999	61.4385	78.451	K	EAVSTRWEIIAEDETKEAENQGLDISSPGMS	WEIIAEDETK(1)EAENQGLDISSPGMSGHR
Q15643	1887	0.999877	39.1674	133.48	K	SHPSIPPPKLSVHDMKPLDSPGRRKRDTNAP	LSVHDMK(1)PLDSPGR
Q15648	1020	0.998947	29.7895	99.943	K	SKDKPPKRKKADTEGKSPSHSSSNRPFTPPT	ADTEGK(0.999)SPSH(0.001)SSSNRPFTPPTSTGGSK
Q15648	1222	0.997483	25.9802	131.62	K	SPMKPVPGTPPSSKAKSPISSGSGGSHMSGT	AK(0.997)SPISSGSGGSHMSGTSSSSGMK(0.003)
Q15648	1188	0.995505	25.8154	163.91	K	KPQGKPSSLMNPSLSKPNISPSHSRPPGGSD	PSSLMNPSLSK(0.996)PNISPSH(0.003)SRPPGGSDK(0.001)
Q15691	151	0.999998	57.2057	149.99	K	AVAPSLVAPALNKPKKPLTSSSAAPQRPIST	K(1)PLTSSSAAPQRPISTQR
Q15697	271	1	94.5328	119.39	K	EPRLSRRQVSSPNAQKPFAHYQRHCRVEYIS	QVSSPNAQK(1)PFAHYQR
Q15942	279	1	80.4101	95.227	K	PKFSPVTPKFTPVASKFSPGAPGGSGSQPNQ	FTPVASK(1)FSPGAPGGSGSQPNQK(1)
Q15942	265	0.637343	2.44876	184.21	K	TQPRGPPASSPAPAPKFSPVTPKFTPVASKF	GPPASSPAPAPK(0.637)FSPVTPK(0.363)
Q16143	12	0.999567	33.7853	71.888	K	____MDVFMKGLSMAKEGVVAAAEKTKQGVT	DVFMKGLSMAK(1)EGVVAAAEK(1)
Q16576	101	0.702877	4.35913	65.795	K	PNDDAQFDASHCDSDKGEFGGFGSVTGKIEC	VH(0.004)IPNDDAQFDASH(0.258)CDSDK(0.703)GEFGGFGSVTGK(0.035)
Q1ED39	118	0.978564	16.5951	103.75	K	VFGHLEFLSGEKKNKKSPLAMSHASGVKTSP	K(0.979)SPLAMSHASGVK(0.021)TSPDPR
Q1ED39	130	0.999971	45.3894	188.63	K	KNKKSPLAMSHASGVKTSPDPRQGEEETRVG	SPLAMSHASGVK(1)TSPDPR
Q1KMD3	227	0.881465	8.82797	83.633	K	RAYYEFREEAYHSRSKSPLPPEEEAKDEEED	SK(0.881)SPLPPEEEAK(0.115)DEEEDQTLVNLDTYTSDLHFQVSK(0.003)
Q1KMD3	237	0.971085	15.3406	87.203	K	YHSRSKSPLPPEEEAKDEEEDQTLVNLDTYT	SK(0.028)SPLPPEEEAK(0.971)DEEEDQTLVNLDTYTSDLHFQVSK(0.001)
Q27J81	380	0.977373	16.3572	53.231	K	DQSQRGSSPQNTTTPKPSVEGQQPAAAAACE	GSSPQNTTTPK(0.977)PSVEGQQPAAAAACEPVDHAQSESILK(0.023)
Q27J81	1132	0.998561	29.2068	71.445	K	SSNQPPAAGSSRQDAKDPTSLLGVLQAEADS	QDAK(0.999)DPTSLLGVLQAEADSTSEGLEDAVH(0.001)SR
Q2KHR3	1194	0.778258	8.30326	50.322	K	PGTQMVRTFCPPPLPKPSSTTPTPLVSETGG	TFCPPPLPK(0.778)PSSTTPTPLVSETGGNSPSDK(0.115)VDNELK(0.107)
Q2M3M2	3	1	66.6977	70.488	K	_____________MSKELAAMGPGASGDGVR	SK(1)ELAAMGPGASGDGVR
Q2NKX8	1038	0.999672	34.8364	93.505	K	ARRIVSDGEDEDDSFKDTSSINPFNTSLFQF	IVSDGEDEDDSFK(1)DTSSINPFNTSLFQFSSVK
Q3B726	326	0.951294	12.94	107.13	K	KKRKHSEEAEFTPPLKCSPKRKGKSNFL___	KHSEEAEFTPPLK(0.951)CSPK(0.048)
Q3KQU3	493	0.775149	5.37763	96.133	K	ASPCPSPGPGHTLPPKPPSPRGTTASPKGRV	PASPCPSPGPGH(0.225)TLPPK(0.775)PPSPR
Q3SY69	641	1	75.682	75.682	K	TALKFAELSVKAGFPKGVINIIPGSGGIAGQ	AGFPK(1)GVINIIPGSGGIAGQR(1)
Q4KMP7	134	0.997338	25.7364	119.6	K	GVETSRALAAGADSPKTEEARPSPAPGPGTP	ALAAGADSPK(0.997)TEEAR(0.003)PSPAPGPGTPTGTPTR
Q4LE39	667	0.995607	23.5529	167.95	K	DEKYSPKNCKLRRLSKPPFQTNPSPEMVSKL	RLSK(0.996)PPFQTNPSPEMVSK(0.004)
Q4LE39	777	0.999198	30.9736	216	K	ENKVHADLVISKPVSKSPERLRKDIEVLSED	VHADLVISK(0.001)PVSK(0.999)SPER
Q53EZ4	427	1	103.311	103.31	K	FQGETENREKVAASPKSPTAALNESLVECPK	VAASPK(1)SPTAALNESLVECPK(1)
Q53H80	137	0.545803	0	59.53	K	GPASPGTSSAASSPLKKEQPLFTLRQVGMIC	HLETSFQQTDPCCTSDAQPH(0.908)AFLLSGPASPGTSSAASSPLK(0.546)K(0.546)
Q53SF7	797	0.535562	0.618869	78.662	K	DSAISESPEEPLPNLKPKPNLRTEHQVPSSV	ETAIQTEDSAISESPEEPLPNLK(0.536)PK(0.464)PNLR
Q53SF7	799	0.499981	0	62.666	K	AISESPEEPLPNLKPKPNLRTEHQVPSSVSS	ETAIQTEDSAISESPEEPLPNLK(0.5)PK(0.5)PNLR
Q56NI9	32	0.560758	1.06072	111.78	K	DSLLHFTENLFPSPNKKHCFYQNSDKNEENL	CDSLLHFTENLFPSPNK(0.561)K(0.439)
Q5BKZ1	269	0.498527	0	138.2	K	KKPKLAKPMEKISLSKSPTKTDPKNEEEEKR	ISLSK(0.499)SPTK(0.499)TDPK(0.003)
Q5BKZ1	273	0.613377	2.01011	138.2	K	LAKPMEKISLSKSPTKTDPKNEEEEKRRIEA	ISLSK(0.386)SPTK(0.613)TDPK(0.001)
Q5FWF5	7	0.971118	15.2665	94.262	K	_________MMSIQEKSKENSSKVTKKSDDK	MSIQEK(0.971)SK(0.029)
Q5H9R7	72	0.503429	0.0595741	52.09	K	LVSFIIEEPPQDMDEKIRYKYPNISCELLTS	AECLEDLVSFIIEEPPQDMDEK(0.503)IR(0.497)
Q5JRA6	1723	0.999997	55.6614	74.206	K	DGPLPHPRWSAEASGKPSPSDPGSGTATMMN	WSAEASGK(1)PSPSDPGSGTATMMNSSSR
Q5JSZ5	864	0.49932	0	73.239	K	NLRCSPLEPDFVPDEKKPECGSWDVSHQPET	CSPLEPDFVPDEK(0.499)K(0.499)PECGSWDVSH(0.001)QPETADTAHGVER
Q5JSZ5	865	0.49932	0	73.239	K	LRCSPLEPDFVPDEKKPECGSWDVSHQPETA	CSPLEPDFVPDEK(0.499)K(0.499)PECGSWDVSH(0.001)QPETADTAHGVER
Q5JSZ5	910	0.880325	8.67053	51.025	K	TAFNISSWDKNGSPNKQPSSEPEWTPEPRSS	EGTAFNISSWDK(0.12)NGSPNK(0.88)QPSSEPEWTPEPR
Q5JSZ5	1697	0.999076	30.3392	128.74	K	SSATSSQRSSPYGTLKPEEMSGPGLAEPKAD	SSPYGTLK(0.999)PEEMSGPGLAEPK(0.001)
Q5JSZ5	1468	0.999991	50.2847	172.28	K	SPRYESQQNGTPLKVKRSPDEALPGGLSGCS	VK(1)RSPDEALPGGLSGCSSGSGHSPYALER
Q5JVS0	96	0.875421	9.86758	113.63	K	HRAGAGGRRESQKERKSLPAPVAQRPDSPGG	K(0.875)SLPAPVAQR(0.09)PDSPGGGLQAPGQK(0.034)
Q5QJE6	132	1	84.6398	98.887	K	SPVSSVRKKPKVTPTKESYTEEIVSEAESHV	VTPTK(1)ESYTEEIVSEAESHVSGISR
Q5SW79	843	0.998721	29.0626	57.39	K	ESSKSLVRQGSFTIEKPSPNIPIELIPHINK	QGSFTIEK(0.999)PSPNIPIELIPHINK(0.001)
Q5SY16	485	0.995268	23.2291	149.36	K	RLAAFADALEFADEEKESPVEFTGHKLIGVY	LAAFADALEFADEEK(0.995)ESPVEFTGHK(0.005)
Q5T1R4	1011	1	76.6009	80.002	K	SPNVSHSAHMTETRSKSFDYGSLSLTGPSAP	SK(1)SFDYGSLSLTGPSAPAPVAPPAR
Q5T5C0	757	0.924939	12.8602	132.62	K	KFSKMVANDIAKMSRKLSLPTDLKPDLDVKD	K(0.925)LSLPTDLK(0.027)PDLDVK(0.048)
Q5T5Y3	868	0.5	0	125.16	K	TTWRQKREQSPSQHGKDPASLLASELVQLHM	EQSPSQH(0.5)GK(0.5)DPASLLASELVQLHMQLEEK
Q5T5Y3	721	0.99997	45.1657	123.55	K	RADEDTEGRLYVSCSKSPNSHDSEPWTLLRQ	LYVSCSK(1)SPNSHDSEPWTLLR
Q5T6F0	35	0.999874	39.0928	78.752	K	SDAQGPQFGWDHSLHKRKRLPPVKRSLVYYL	APASPGAGSDAQGPQFGWDHSLHK(1)R
Q5T6F0	11	0.998943	29.758	64.27	K	_____MARKVVSRKRKAPASPGAGSDAQGPQ	K(0.999)APASPGAGSDAQGPQFGWDHSLHK(0.001)
Q5T6F2	252	0.999114	30.5202	87.208	K	QDLSNKSSYGLKGAWKNSVEEWTTEDWTEDL	GAWK(0.999)NSVEEWTTEDWTEDLSETK(0.001)
Q5T7B8	1122	0.999921	41.0349	104.3	K	SATRHLWLSSSPPDNKPGGDLPALSPSPIRQ	HLWLSSSPPDNK(1)PGGDLPALSPSPIR
Q5TCZ1	552	0.999993	51.5578	76.329	K	GPTGASESQDSPRKLKYEEPEYDIPAFGFDS	LK(1)YEEPEYDIPAFGFDSEPELSEEPVEDR
Q5TZ20	272	0.999996	54.2353	56.488	K	FMYLQPANRRSKNQGKFVSLFYTIVTPLLNP	NQGK(1)FVSLFYTIVTPLLNPIIYTLR
Q5UIP0	781	0.6276	2.26673	142.89	K	CIDFSPYNIKYQPKVKSPQRPSDWSKKKNEP	VK(0.628)SPQRPSDWSK(0.372)
Q5VT06	943	0.953204	13.3325	101.61	K	PQSAISSFRVRSPGPKPEGLLAQLCKRQTDS	VR(0.003)SPGPK(0.953)PEGLLAQLCK(0.044)
Q5VT52	741	0.996415	24.4394	68.361	K	RDERSGTPTQDEMMDKPTSSSVDTMSLLSKI	SGTPTQDEMMDK(0.996)PTSSSVDTMSLLSK(0.004)
Q5VUA4	1854	0.994124	22.2834	156.16	K	NKLMTGSETPSKVVIKLSPQACSFTKAKLDS	VVIK(0.994)LSPQACSFTK(0.006)
Q5VWN6	1360	1	73.2937	73.294	K	VYPSVSEEPVENKERKGDNLQPVTLILSKEN	K(1)GDNLQPVTLILSK(1)
Q5VWN6	2007	0.994334	22.4423	167.55	K	NGDSQHSASSANVFPKESPTQISIGAFPSTK	NGDSQHSASSANVFPK(0.994)ESPTQISIGAFPSTK(0.006)
Q5VZ89	740	0.949101	12.706	119.68	K	LKLCFSRHPTGNSITKSPPLMAKRTKQEIKT	HPTGNSITK(0.949)SPPLMAK(0.051)
Q63ZY3	26	0.975869	19.0027	48.716	K	FPGTPGPASPPAFPAKDPDPPYSVETPYGYR	AQVLH(0.012)VPAPFPGTPGPASPPAFPAK(0.976)DPDPPYSVETPYGYR(0.012)
Q641Q2	1191	0.355501	0	81.242	K	GEASSDDDLFQSAKPKPAKKTNPFPLLEDED	SPMFPALGEASSDDDLFQSAK(0.356)PK(0.356)PAK(0.289)
Q641Q2	810	0.98612	18.5153	76.588	K	PRTKTVLSLFDEEEDKMEDQNIIQAPQKEVG	TVLSLFDEEEDK(0.986)MEDQNIIQAPQK(0.014)
Q66GS9	491	0.91129	10.1169	72.801	K	SYSAREKSSIFRTPEKGDYNSEIHQITRERD	SSIFR(0.089)TPEK(0.911)GDYNSEIHQITR
Q66K14	396	0.999462	32.6892	102.84	K	KDRDFLVQRISDFLQKTPSKQPGSIGSRKAS	ISDFLQK(0.999)TPSK(0.001)QPGSIGSR
Q66K14	461	0.991431	20.6331	121.36	K	QEAPTASQGLLKLFQKNSPMEDLGAKGAKEK	LFQK(0.991)NSPMEDLGAK(0.009)
Q68CZ1	318	0.758182	4.96289	58.29	K	HDALMANGDELNMQLKEQRLKCCSLEKQLHS	ISHDALMANGDELNMQLK(0.758)EQR(0.242)
Q68CZ2	359	0.670588	3.68255	74.841	K	HTQGPVDGSLYAKVRKKSSSDPGIPGGPQAI	K(0.671)K(0.287)SSSDPGIPGGPQAIPATNSPDH(0.041)SDH(0.002)TLSVSSDSGHSTASAR
Q68CZ2	360	0.528877	0	74.841	K	TQGPVDGSLYAKVRKKSSSDPGIPGGPQAIP	K(0.529)K(0.529)SSSDPGIPGGPQAIPATNSPDH(0.923)SDH(0.019)TLSVSSDSGHSTASAR
Q68CZ2	774	0.995422	23.3734	148.36	K	RQGSSAEQPLGGRLRKLSLGQYDNDAGGQLP	K(0.995)LSLGQYDNDAGGQLPFSK(0.005)
Q68DK7	204	0.997018	25.2425	116	K	AGTLAASEGRWKSMRKSPLGGGGGSGASSQA	K(0.997)SPLGGGGGSGASSQAACLK(0.003)
Q68EM7	578	0.998922	29.6658	42.55	K	GILEQGPSPGDGSPPKPKDPVSAAVPAPGRN	AESSSGGGTVPSSAGILEQGPSPGDGSPPK(0.999)PK(0.999)DPVSAAVPAPGR(0.002)
Q68EM7	580	0.998922	29.6658	74.498	K	LEQGPSPGDGSPPKPKDPVSAAVPAPGRNNS	AESSSGGGTVPSSAGILEQGPSPGDGSPPK(0.999)PK(0.999)DPVSAAVPAPGR(0.002)
Q69YH5	939	0.999999	61.3192	82.627	K	ICTFDSSGFESMSPIKETVSSRQKPQMAPPV	TICTFDSSGFESMSPIK(1)ETVSSR
Q6IE81	746	1	80.8887	92.264	K	NQTAVKVPTTPASPVKNWGGFRIPKKGERQQ	VPTTPASPVK(1)NWGGFR
Q6IQ55	482	0.999447	35.1329	62.707	K	LETCLEKMQKDTSAGKESILPALLHKPCVPA	DTSAGK(0.999)ESILPALLHKPCVPAVSR
Q6L8Q7	202	0.999944	42.495	79.426	K	FGDPASSLFRWYKEAKPGAAEPEVGVPSSLS	EAK(1)PGAAEPEVGVPSSLSPSSPSSSWTETDVEER
Q6NTF9	246	0.517975	4.10016	55.336	K	YVSGSSAERRAAQSRKLNPVPGSYPTQSCHP	K(0.518)LNPVPGSYPTQSCH(0.048)PH(0.173)LSPSH(0.202)PVSQTQHASGQK(0.059)
Q6NZI2	299	1	114.275	162.88	K	AERREKLKTSRDKLRKSFTPDHVVYARSKTA	K(1)SFTPDHVVYAR
Q6P0N0	1020	0.868996	8.21733	54.072	K	FQDSEDDDDILPNMDKNPTTPSSVIFPLVKT	ILLPSFQDSEDDDDILPNMDK(0.869)NPTTPSSVIFPLVK(0.131)
Q6P0Q8	72	0.935601	11.6221	138.19	K	KEQDVVTGVSPLLFRKLSNPDIFSSTGKVKL	K(0.936)LSNPDIFSSTGK(0.064)
Q6P996	18	1	82.8985	130.44	K	ASLEKIADPTLAEMGKNLKEAVKMLEDSQRR	IADPTLAEMGK(1)NLKEAVK
Q6PIJ6	698	0.940145	11.961	117.54	K	ADMKAARDIPEKKKNKDVYPSCSSTTASTVG	NK(0.94)DVYPSCSSTTASTVGNSSSH(0.06)NTASQSPDFVR
Q6PJT7	667	0.998089	27.1809	79.935	K	CPFTHVSRRIPVLSPKPAVAPPAPPSSSQLC	R(0.002)IPVLSPK(0.998)PAVAPPAPPSSSQLCR
Q6PL24	151	0.995848	23.7997	71.853	K	LSADLESADLLGDHRKVSPPLMAPPCIWTFA	K(0.996)VSPPLMAPPCIWTFAK(0.004)
Q6SPF0	435	0.970939	15.2429	55.919	K	ATGPDSPSPVPLPPGKPALPGADGTPFGCPP	EGGTASVATGPDSPSPVPLPPGK(0.971)PALPGADGTPFGCPPGRK(0.029)
Q6STE5	169	1	98.9076	106.99	K	KRKLRLYISNTFNPAKPDAEDSDGSIASWEL	LYISNTFNPAK(1)PDAEDSDGSIASWELR
Q6T4R5	489	0.834597	7.02958	63.277	K	ASLSHSAGNISALADKGDTMFTPAVSSRTRS	GQSIAASLSH(0.165)SAGNISALADK(0.835)GDTMFTPAVSSR
Q6T4R5	335	0.579375	1.39079	129.06	K	QRPKNPIHNIPSTLDKQTNWSKALPLPTPEE	NPIHNIPSTLDK(0.579)QTNWSK(0.421)
Q6U841	451	0.999331	34.3288	46.106	K	IRIEPPKNVPSQEKRKIPAVPNGTAAHGEAE	R(0.999)K(0.999)IPAVPNGTAAH(0.988)GEAEPH(0.103)GGH(0.048)SGPELQR(0.862)
Q6V0I7	4771	0.999999	59.1104	81.765	K	PQAMASHGSRPGSRLKQPIGQIPLESSPPVG	LK(1)QPIGQIPLESSPPVGLSIEEVER
Q6VMQ6	676	0.999905	41.4372	117.83	K	KKRHEHPPNPPVSPGKTVNDVNSNNNMSYRN	RHEHPPNPPVSPGK(1)TVNDVNSNNNMSYR
Q6VY07	396	0.53127	0.543922	99.709	K	SGPEMEETESILSTPKPKLKPFFEGMSQSSS	EVEEDLDELYDSLEMYNPSDSGPEMEETESILSTPK(0.531)PK(0.469)
Q6WCQ1	976	0.997748	26.4654	154.13	K	RLKEQLKAATEALGEKSPDSATVSGYDIMKS	AATEALGEK(0.998)SPDSATVSGYDIMK(0.002)
Q6WCQ1	541	0.999894	39.7445	93.495	K	QKRSRARERRREGRSKTFDWAEFRPIQQALA	SK(1)TFDWAEFRPIQQALAQER
Q6WCQ1	211	0.993453	22.0188	59.399	K	VPTTKSTLWQEEMRTKDQPDGSSLSPAQSPS	TK(0.993)DQPDGSSLSPAQSPSQSQPPAASSLREPGLESK(0.006)
Q6WKZ4	352	0.82997	7.2794	53.819	K	DSSPSSSPSPKGFRKKHLFSSTENLAAGSWK	K(0.83)H(0.015)LFSSTENLAAGSWK(0.155)EPAEGGGLSSDR
Q6ZMT1	47	1	110.721	135.86	K	QRFKRSLSLKTILRSKSLENFFLRSGSELKC	SK(1)SLENFFLR
Q6ZN55	155	1	87.3386	93.404	K	LWLNHRQTHLRATPTKAPAPVVLGSPVVLGP	ATPTK(1)APAPVVLGSPVVLGPPVGQAR
Q6ZQQ6	1340	0.979861	16.6056	55.302	K	REDMIQGVTQEVIRHKEVMPREEEQAQKKAR	EDMIQGVTQEVIR(0.98)H(0.962)K(0.98)EVMPR(0.078)
Q70Z35	580	0.999987	48.7985	150.09	K	SDEEMEGSNMKHRLMKHDLKVVENVIAKSLL	LMK(1)H(1)DLKVVENVIAK
Q71F56	925	0.970433	17.2305	77.221	K	LTEFKMEVEDGLGSPKPEEIKDFSYVHKVPS	MEVEDGLGSPK(0.97)PEEIK(0.011)DFSYVHK(0.018)
Q71RC2	589	1	139.139	217.67	K	GLNQTTIPVSPPSTTKPSRASTASPCNNNIN	DGLNQTTIPVSPPSTTK(1)PSR
Q71RG4	212	1	70.6796	70.68	K	GALKSKYFPGQESQMKLIYQGRLLQDPARTL	YFPGQESQMK(1)LIYQGR(1)LLQDPAR(1)
Q76FK4	347	0.867812	7.45354	60.345	K	DPFEVVRDDFKSGVHKLHSLIGLGIKNRVSC	SGVH(0.868)K(0.868)LH(0.265)SLIGLGIK(1)
Q7L014	930	0.5	0	98.533	K	KQEEERQDGGQNESFKRYEEELEINDFPQTA	QDGGQNESFK(0.5)R(0.5)YEEELEINDFPQTAR
Q7L4I2	84	0.999724	32.0145	69.672	K	EGRRHESKDKSSKKHKSEEHNDKEHSSDKGR	H(1)K(1)SEEH(0.878)NDK(0.561)EH(0.561)SSDK(1)
Q7L4I2	91	0.5611	0	69.672	K	KDKSSKKHKSEEHNDKEHSSDKGRERLNSSE	H(1)K(1)SEEH(0.878)NDK(0.561)EH(0.561)SSDK(1)
Q7LFX5	263	1	51.9416	51.942	K	FRLRCLPHFYIIGQPKCGTTDLYDRLRLHPE	CLPH(1)FYIIGQPK(1)CGTTDLYDR(1)LR(1)
Q7RTP6	1370	0.997459	28.3158	82.034	K	TPAFRPVSLKSYSVEKSPQDEGLHLLKPLSI	SYSVEK(0.997)SPQDEGLH(0.001)LLK(0.001)PLSIPK(0.001)
Q7Z2K8	613	0.991964	20.9143	116.74	K	AEAIPEGKVGSLPLEKGSPVTTTKADPRASG	VGSLPLEK(0.992)GSPVTTTK(0.008)
Q7Z2W4	374	1	126.766	131.11	K	WKSLTSWTNDQGARRKTVFSPTLPAARSSLG	K(1)TVFSPTLPAAR
Q7Z333	909	0.999946	42.6932	199.12	K	KELIPFTEMTNASEKKSSPFKDLMTVPESRD	K(1)SSPFKDLMTVPESR
Q7Z3B3	899	0.902368	9.65791	87.091	K	EILTPSWREVDLQSLKGSPDEENEEIEDLSD	EVDLQSLK(0.902)GSPDEENEEIEDLSDAAFAALHAK(0.098)
Q7Z3B3	267	1	66.2598	130.56	K	TDSSSNLGGVKLEGKKSPLSSILFSALDSDT	K(1)SPLSSILFSALDSDTR
Q7Z3B3	266	0.5	0	130.56	K	GTDSSSNLGGVKLEGKKSPLSSILFSALDSD	LEGK(0.5)K(0.5)SPLSSILFSALDSDTR
Q7Z3U7	1184	0.999998	56.9767	60.51	K	FQEILQIVSPVRDSDKPETPPVVNVPVPVLI	DSDK(1)PETPPVVNVPVPVLIGPISGMSR
Q7Z401	1014	0.615304	2.03972	149.3	K	NETRNIQSRCFRKRHKSDNETNLQQQVVWGN	H(0.385)K(0.615)SDNETNLQQQVVWGNR
Q7Z422	38	1	113.675	130.47	K	LEKKLKITQKESRKSKSPPKVPIVIQDDSLP	SK(1)SPPK(1)VPIVIQDDSLPAGPPPQIR
Q7Z422	42	1	116.919	137.72	K	LKITQKESRKSKSPPKVPIVIQDDSLPAGPP	SK(1)SPPK(1)VPIVIQDDSLPAGPPPQIR
Q7Z434	136	1	80.0684	111.72	K	TPAAAHSIPYNSCREKEPSYPMPVQETQAPE	EK(1)EPSYPMPVQETQAPESPGENSEQALQTLSPR
Q7Z460	1205	0.646927	2.62995	95.873	K	EKFSFRSQEDLNEPIKRDGKKECDIVSRDGG	FSFR(0.353)SQEDLNEPIK(0.647)R
Q7Z460	691	1	77.2462	78.324	K	SANPAGAGSRSSSPGKLLGSGYGGLTGGSSR	SSSPGK(1)LLGSGYGGLTGGSSR
Q7Z4H7	863	0.499551	0	72.433	K	REESYLSNSQTPERHKPELSPTPQNVQTDDT	H(0.5)K(0.5)PELSPTPQNVQTDDTLNFLDTCDLHTEHIK(0.001)PSLR
Q7Z4Q2	10	0.813266	6.56187	71.907	K	______MGKSRTKRFKRPQFSPTGDCQAEAA	FK(0.813)R(0.179)PQFSPTGDCQAEAAAAANGTGGEEDDGPAAELLEK(0.007)
Q7Z569	120	0.999282	31.4566	76.415	K	DHSKECINAAPDSPSKQLPDQISFFSGNPSV	ECINAAPDSPSK(0.999)QLPDQISFFSGNPSVEIVHGIMHLYK(0.001)
Q7Z5J4	862	0.542681	0.8578	72.414	K	TADFGDLPLLPPTSRKEDLEAEEEYSSLCEL	K(0.543)EDLEAEEEYSSLCELLGSPEQR(0.445)PGMQDPLSPK(0.012)
Q7Z5K2	911	0.99926	33.3494	80.109	K	QQYNRAEDSICLADSKPLPHQNVTNHVGKAV	AEDSICLADSK(0.999)PLPHQNVTNHVGK
Q7Z699	78	0.910695	10.085	79.713	K	ERLRDKMVVLECMLKKDLIYNKVTPTFHHWK	K(0.911)DLIYNK(0.089)
Q7Z6B7	951	0.800917	6.04555	63.442	K	RRSTSSGQYTGFNDHKPLDPETIAQDIEETM	STSSGQYTGFNDH(0.199)K(0.801)PLDPETIAQDIEETMNTALNELR
Q7Z6B7	1039	1	72.4097	80.752	K	IRRSTSSSSDTMSTFKPMVAPRMGVQLKPPA	STSSSSDTMSTFK(1)PMVAPR
Q7Z6E9	1254	0.999243	31.2226	121.19	K	SSKVKQEKVKGKVRRKVTGTEGSSSTLVDYT	RK(0.999)VTGTEGSSSTLVDYTSTSSTGGSPVR(0.001)
Q7Z7B0	1199	0.740247	4.54819	71.286	K	FEPRAETQSMKIELKKSAASSTTSLGGGKG_	IELK(0.26)K(0.74)SAASSTTSLGGGK
Q86TC9	380	1	65.0692	76.237	K	DSEGDPNKEEMNRIQKPNEVSSPPTTSAVIP	IQK(1)PNEVSSPPTTSAVIPPAVPQAQHLVAQPR
Q86TC9	760	0.999992	51.1486	148.13	K	FTLSSTPQTIQRTVSKESLLVSHPSVQTKSP	TVSK(1)ESLLVSHPSVQTK
Q86U70	321	0.5	0	73.487	K	TMSSGGGNTNNSNSKKKSPASTFALSSQVPD	K(0.5)K(0.5)SPASTFALSSQVPDVMVVGEPTLMGGEFGDEDER
Q86U70	322	0.5	0	73.487	K	MSSGGGNTNNSNSKKKSPASTFALSSQVPDV	K(0.5)K(0.5)SPASTFALSSQVPDVMVVGEPTLMGGEFGDEDER
Q86UE4	303	0.993448	21.8083	77.66	K	EKSVKLSSQISAGEEKWNSVSPASAGKRKTE	LSSQISAGEEK(0.993)WNSVSPASAGK(0.007)R
Q86UE4	314	1	119.584	158.34	K	AGEEKWNSVSPASAGKRKTEPSAWSQDTGDA	WNSVSPASAGK(1)R
Q86UQ4	1661	0.501144	0	69.765	K	VHHTSPQNAGYMQALKKVTSVMRTLKKADID	DVFNSLMPVVH(0.499)H(0.499)TSPQNAGYMQALK(0.501)K(0.501)
Q86UU0	95	0.992359	21.1354	80.702	K	HGAKANQISPSNSSLKNPQAGVPPFSSLKGK	ANQISPSNSSLK(0.992)NPQAGVPPFSSLK(0.008)
Q86UU0	933	0.835004	7.32767	113.22	K	TISINQMGSPGMGHLKSPTLSQVHSPLVTSP	RPSDLTISINQMGSPGMGH(0.154)LK(0.835)SPTLSQVH(0.003)SPLVTSPSANLK(0.008)
Q86UU0	953	0.995214	24.4651	52.35	K	SQVHSPLVTSPSANLKSPQTPSQMVPLPSAN	SPTLSQVH(0.001)SPLVTSPSANLK(0.995)SPQTPSQMVPLPSANPPGPLK(0.004)
Q86UU0	974	0.999698	35.2041	73.389	K	SQMVPLPSANPPGPLKSPQVLGSSLSVRSPT	SPQTPSQMVPLPSANPPGPLK(1)SPQVLGSSLSVR
Q86UU1	215	1	144.893	210.07	K	IMDSLVLEEPGAAGKKPAATSPLSPMANGGR	K(1)PAATSPLSPMANGGR
Q86UY6	169	1	53.168	53.168	K	FLIQILQLMANSTQMKKVMLTVFKHNHGAYQ	FLIQILQLMANSTQMK(1)K(1)
Q86UY8	273	1	67.1018	76.301	K	HIKGIMYRAIEADIEKYICYAEQTRAVLAKL	GIMYRAIEADIEK(1)YICYAEQTR(1)
Q86V15	1476	0.997614	23.36	76.927	K	RENCGYKFCGRTHMYKHAQHHDRVDNLVLDD	FCGR(0.04)TH(0.96)MYK(0.998)H(0.998)AQH(0.502)H(0.502)DR(0.001)
Q86V25	296	0.999932	41.7413	85.554	K	KELEKYARDMRMKILKPASAHSPTQVRSRGK	ILK(1)PASAHSPTQVR
Q86V48	656	1	63.8363	106.87	K	HEALRCRVIKSSGREKPDSDDDLDIASLVTA	EK(1)PDSDDDLDIASLVTAK
Q86VQ1	254	0.455369	0	92.805	K	QQLQRSKQSSRHSKEKDRQSPLHGNHITISH	EK(0.455)DR(0.455)QSPLH(0.065)GNH(0.024)ITISHTQATGSR
Q86VQ1	231	0.665053	2.9788	104.41	K	RSHQRSASWGSADQLKEQIAKLRQQLQRSKQ	SASWGSADQLK(0.665)EQIAK(0.335)
Q86VQ1	408	0.99962	34.1964	95.854	K	DSGSSSPLPKYASSPKPNNSYMFKREPPEGC	YASSPK(1)PNNSYMFK
Q86W92	430	0.87639	8.50644	52.402	K	ATVSMETSEKSKLTPKPETSFEENDGNIILG	LTPK(0.876)PETSFEENDGNIILGATVDTQLCDK(0.124)
Q86WB0	343	0.999999	61.1031	79.663	K	RSQDATFSPGSEQAEKSPGPIVSRTRSWDSS	SQDATFSPGSEQAEK(1)SPGPIVSR
Q86XI2	493	0.999994	52.5746	78.488	K	AFVDMLLKIKAVRAAKFWKICPMEHILVRLE	AAK(1)FWK(1)ICPMEHILVR
Q86XI2	496	0.999999	60.7847	78.488	K	DMLLKIKAVRAAKFWKICPMEHILVRLETDS	AAK(1)FWK(1)ICPMEHILVR
Q86XP3	194	0.529713	0.516768	62.487	K	DNLEYDSDGNPIAPTKKIIDPLPPIDHSEID	YMAENPTAGVVQEEEEDNLEYDSDGNPIAPTK(0.53)K(0.47)
Q86XZ4	417	0.518536	0.322114	56.089	K	SSSTCASPPSLTSANKKNFAPGETPAAIANS	SR(1)CSSVTSVSLSSPSDASAASSSTCASPPSLTSANK(0.519)K(0.481)
Q86YC2	784	0.999998	56.7981	117.48	K	LASDTKQFDSSGSPAKPHTTLQVSGRQGQPT	QFDSSGSPAK(1)PHTTLQVSGR
Q86YR7	655	0.998601	27.4926	41.483	K	SIIDGYITPMDFIWLKHLIPDVLQNNKDFLF	SIIDGYITPMDFIWLK(0.999)H(0.996)LIPDVLQNNK(0.215)DFLFGNIR(0.79)
Q86YV5	789	0.999288	31.4738	55.033	K	GPSSELAHSPTNSGKKLFAPVPFPSGSTEDV	K(0.999)LFAPVPFPSGSTEDVSPSGPQQPPPLPQK(0.001)
Q8IU81	438	0.68448	3.36334	142.55	K	IAALKNVAEALGHSPKDPGGGGGPVRAGGAS	NVAEALGH(0.316)SPK(0.684)DPGGGGGPVR
Q8IV01	95	1	96.1542	99.923	K	AWNAQRASTRGPPSRKGSLSIEDTFESISEL	K(1)GSLSIEDTFESISELGPLELMGR
Q8IVF2	1444	0.999981	46.4304	58.776	K	PEIDIKGPKLDLKDPKVEVTAPDVEVSLPSV	DPK(1)VEVTAPDVEVSLPSVEVDVEAPGAK(0.817)LDGGR(0.183)
Q8IVF2	1469	0.817349	6.50775	58.776	K	VSLPSVEVDVEAPGAKLDGGRLEEDMSLADK	DPK(1)VEVTAPDVEVSLPSVEVDVEAPGAK(0.817)LDGGR(0.183)
Q8IVH2	445	0.999956	43.6059	96.455	K	ASLHGGGPARRRSSDKFCSPISSELAQNHEF	SSDK(1)FCSPISSELAQNHEFYK
Q8IW50	106	0.999974	45.8627	66.36	K	VPNKGYSSLDQSPDEKPLVALDTDSDDDFDM	GYSSLDQSPDEK(1)PLVALDTDSDDDFDMSR
Q8IWB9	445	0.61104	2.0444	63.381	K	TEGESKVDKLSDIPLKPEVLAEDGVVLDSED	LSDIPLK(0.611)PEVLAEDGVVLDSEDEVDSAVQH(0.007)PELPVK(0.382)
Q8IWB9	724	0.99837	30.3317	100.88	K	KLKSEIKKSSGVSGGKPGLLPAHSRHNSPSG	SSGVSGGK(0.998)PGLLPAH(0.001)SR(0.001)
Q8IWI9	613	1	175.359	252.2	K	KVVNANQNASPNVPGKRGRPRKLKLCKAGRP	VVNANQNASPNVPGK(1)R
Q8IWJ2	1101	0.99999	49.9864	96.665	K	EVQILEVQRAKAMVDKELEAEKLQKEQKIKE	AMVDK(1)ELEAEKLQK(1)
Q8IWV7	1590	0.5	0	130.07	K	LNCLKQKNTVVRYPRKRNSLIELPDDYSCLL	K(0.5)R(0.5)NSLIELPDDYSCLLNQASHFR
Q8IWW6	439	0.4265	0.325507	78.128	K	TIVLDTNDKESPTASKPCFPENESSPSSPKH	HSTIVLDTNDK(0.396)ESPTASK(0.427)PCFPENESSPSSPK(0.178)
Q8IWX8	185	0.997656	26.3138	56.9	K	KDAISAGKNWMFSNAKSPPHCELMAGHLRNR	NWMFSNAK(0.998)SPPH(0.002)CELMAGHLR
Q8IWZ3	1551	0.744022	4.67784	61.361	K	VTTPSTNRKNKKNKTKETPPTAHLILPEQHM	TK(0.744)ETPPTAH(0.253)LILPEQHMSLAQQK(0.003)
Q8IXM2	98	0.459005	0	87.496	K	KVYEDSGIPLPAESPKKGPKKVASGVLSPPP	VYEDSGIPLPAESPK(0.459)K(0.459)GPK(0.082)
Q8IXM2	99	0.459005	0	87.496	K	VYEDSGIPLPAESPKKGPKKVASGVLSPPPA	VYEDSGIPLPAESPK(0.459)K(0.459)GPK(0.082)
Q8IXQ5	8	0.985673	18.2885	80.455	K	________MAASGVEKSSKKKTEKKLAAREE	MAASGVEK(0.986)SSK(0.98)K(0.034)
Q8IXQ5	11	0.98037	16.9208	80.455	K	_____MAASGVEKSSKKKTEKKLAAREEAKL	MAASGVEK(0.986)SSK(0.98)K(0.034)
Q8IXZ2	428	0.689029	5.21463	56.688	K	RSPSGDRPAVGHSGLKPLSGETPLSAYKVKS	SPSGDR(0.052)PAVGH(0.207)SGLK(0.689)PLSGETPLSAYK(0.051)
Q8IYB3	763	1	72.7691	114.66	K	SSSRSVSGSPEPAAKKPPAPPSPVQSQSPST	K(1)PPAPPSPVQSQSPSTNWSPAVPVK(1)
Q8IYB7	131	0.625043	3.86195	47.66	K	LPEEHWKVVKPESNDKETEAAYESDIPEELC	VVK(0.257)PESNDK(0.625)ETEAAYESDIPEELCGH(0.032)H(0.005)LPQQSLK(0.082)
Q8IYH5	605	0.9664	14.5883	136.93	K	RVKLVFDKVGLPARPKSPLDPKKDGESLSYS	VGLPARPK(0.966)SPLDPK(0.034)
Q8IYL3	174	0.999958	43.7189	66.519	K	VQKQNEPGLQTEDVQKPPLQMDNSVFLDDDS	QNEPGLQTEDVQK(1)PPLQMDNSVFLDDDSNQPMPVSR
Q8IZ21	297	0.638353	2.469	73.292	K	NSGTLLSKPSPPLPPKRGIPSTSVPTLESAA	NSNPVIAELSQAINSGTLLSK(0.362)PSPPLPPK(0.638)R
Q8IZD2	1069	1	92.6447	139.46	K	DSTHSGRGTMYSSWVKSPDRTGVNFSVNSNL	GTMYSSWVK(1)SPDR
Q8IZD2	1356	0.999637	34.3954	87.429	K	PDTSQNTCKSPPKMSKPGSPGSVIPAQAHGK	MSK(1)PGSPGSVIPAQAHGK
Q8IZE3	525	0.999924	41.1878	54.003	K	KNTSEDSENFPSSSKKSEEWPDWSEPEEPEN	K(1)SEEWPDWSEPEEPENQTVNIQIWPR
Q8IZH2	1655	0.999119	30.5469	86.261	K	NIVKVSPRESSSASLKSSPIAQPASSFQVET	ESSSASLK(0.999)SSPIAQPASSFQVETASQGHSISHHK(0.001)
Q8IZL2	533	0.887451	10.5734	40.872	K	GPSAQGGHLDVLMQQKPQDLSRSFINNPHPA	AGPSAQGGH(0.015)LDVLMQQK(0.887)PQDLSR(0.078)SFINNPH(0.015)PAMEPR(0.006)
Q8IZP0	180	1	130.106	195.6	K	PARTGTLSRTNPPTQKPPSPPMSGRGTLGRN	TNPPTQK(1)PPSPPMSGR
Q8IZT6	657	1	96.0675	96.067	K	LSIFRTPISKTNKRTKPIIAVAQSSLTFIKP	TK(1)PIIAVAQSSLTFIK(1)PLK(1)
Q8IZT6	671	1	96.0675	96.067	K	TKPIIAVAQSSLTFIKPLKTDIPRHPMPFAA	TK(1)PIIAVAQSSLTFIK(1)PLK(1)
Q8IZY2	781	0.733856	4.39953	59.342	K	NFPFRRSYWCGPRPPKSPAPCPTPLDPKVLV	SYWCGPR(0.999)PPK(0.734)SPAPCPTPLDPK(0.267)
Q8N108	486	0.999664	34.7272	154.34	K	KSERPAKRRRVNSNGKESPGSSEFFQEAVSH	R(0.002)VNSNGK(1)ESPGSSEFFQEAVSHGK(0.999)
Q8N1G4	508	0.913847	10.2882	114.51	K	KDVMDALILKMAEMKKYTLENKEEGSLSDTE	K(0.914)YTLENK(0.086)EEGSLSDTEADAVSGQLPDPTTNPSAGK(0.001)
Q8N1G4	514	1	68.7025	122.21	K	LILKMAEMKKYTLENKEEGSLSDTEADAVSG	YTLENK(1)EEGSLSDTEADAVSGQLPDPTTNPSAGK
Q8N2M8	355	0.999979	46.8424	55.965	K	AAAAAAAAASGVTTGKPPAPPQPGGPAPGRN	ITFITSFGGSDEEAAAAAAAAAASGVTTGK(1)PPAPPQPGGPAPGR
Q8N2Y8	6	0.995984	24.6583	95.71	K	__________MDSPPKLTGETLIVHHIPLVH	MDSPPK(0.996)LTGETLIVH(0.003)H(0.001)IPLVHCQVPDR
Q8N3D4	178	0.999999	61.0409	83.773	K	ATDDDMQSLASLMSVKPSDVGNLDDFAESDE	ATDDDMQSLASLMSVK(1)PSDVGNLDDFAESDEDEAHGPGAPEAR
Q8N3V7	836	0.989681	19.8187	110.32	K	IKEPAKVSPRAASPAKPSSLDLVPNLPKGAL	AASPAK(0.99)PSSLDLVPNLPK(0.01)
Q8N3V7	822	0.632237	2.64646	95.073	K	PPYQLRPSLFVLSPIKEPAKVSPRAASPAKP	QPPYQLR(0.024)PSLFVLSPIK(0.632)EPAK(0.344)
Q8N4C8	74	0.502737	0	94.409	K	TEDEEEEIKQEINMLKKYSHHRNIATYYGAF	QEINMLK(0.503)K(0.503)YSH(0.951)H(0.951)R(0.093)
Q8N4C8	75	0.502737	0	94.409	K	EDEEEEIKQEINMLKKYSHHRNIATYYGAFI	QEINMLK(0.503)K(0.503)YSH(0.951)H(0.951)R(0.093)
Q8N556	333	1	116.281	140.79	K	KVTGKKITKIISLGKKKPSTDEQTSSAEEDV	K(1)K(1)PSTDEQTSSAEEDVPTCGYLNVLSNSR
Q8N556	334	1	113.423	139	K	VTGKKITKIISLGKKKPSTDEQTSSAEEDVP	K(1)K(1)PSTDEQTSSAEEDVPTCGYLNVLSNSR
Q8N5W9	18	0.499905	0	53.32	K	GRLSLQDVPELVDAKKKGDGVLDSPDSGLPP	K(0.5)K(0.5)GDGVLDSPDSGLPPSPSPSHWGLAAGGGGGER
Q8N5W9	19	0.499905	0	53.32	K	RLSLQDVPELVDAKKKGDGVLDSPDSGLPPS	K(0.5)K(0.5)GDGVLDSPDSGLPPSPSPSHWGLAAGGGGGER
Q8N608	522	1	89.9108	89.911	K	DNPAKYFILESNSMLKEAILKKKIGKPEIKI	YFILESNSMLK(1)EAILK(1)
Q8N6G6	1574	0.955336	13.3025	80.412	K	RSCGGGVQTRRVTCQKLKASGISTPVSNDMC	VTCQK(0.955)LK(0.045)ASGISTPVSNDMCTQVAK
Q8N7R7	104	0.557769	2.42916	98.676	K	TIFLSKSQTDVREKRKSNHLNHVSPGQLTKK	K(0.558)SNH(0.123)LNHVSPGQLTK(0.319)
Q8N7R7	119	1	120.643	149.42	K	KSNHLNHVSPGQLTKKYSSCSTIFLDDSTVS	K(1)YSSCSTIFLDDSTVSQPNLR
Q8N999	212	0.86995	7.67068	64.68	K	IGTNINGNPYGLGSKKHPLHLLIPHGAFQIR	K(0.87)H(0.272)PLH(0.857)LLIPH(0.016)GAFQIR(0.897)NLPSLK(0.088)
Q8N9M1	386	1	82.645	82.645	K	TSTKSKSSAEVKVTIKRTLVGPRGSSSSEGL	VTIK(1)R(1)TLVGPR(1)
Q8NBN3	484	0.643834	2.57122	85.881	K	FAFSPLSEEEEEDEQKEPMLKESFEGMKMRS	FAFSPLSEEEEEDEQK(0.644)EPMLK(0.356)
Q8NC51	228	0.99927	31.3659	129.76	K	EDKRGGSGSHNWGTVKDELTESPKYIQKQIS	GGSGSHNWGTVK(0.999)DELTESPK(0.001)
Q8NCF5	188	0.873013	8.3726	286.57	K	SPWKTKLRTKDKEEKKKTEFLDLDNSPLSPP	K(0.873)K(0.127)TEFLDLDNSPLSPPSPR
Q8ND04	664	0.968732	17.8038	48.392	K	NFPVFEPSTPDPAPAKNESSPAPPDSDADKL	LDHINFPVFEPSTPDPAPAK(0.969)NESSPAPPDSDADK(0.016)LK(0.015)
Q8ND24	45	0.99601	23.9729	101.72	K	GLPDGLSTKDSAQKQKNSPLLSVSSQTITKE	QK(0.996)NSPLLSVSSQTITK(0.004)
Q8ND56	191	0.999998	57.8662	88.395	K	QLSQGRSSPQLDPLRKSPTMEQAVQTASAHL	K(1)SPTMEQAVQTASAHLPAPAAVGR
Q8NDV7	939	0.954022	13.17	88.163	K	DPPKSNQSLGWGDSSKPVSSPDWNKQQDIVG	SNQSLGWGDSSK(0.954)PVSSPDWNK(0.046)
Q8NEF9	206	0.780921	8.02699	93.729	K	MEHGPKAVTIANSPSKPSEKDSVVSLESQKT	AVTIANSPSK(0.781)PSEK(0.096)DSVVSLESQK(0.123)
Q8NEM7	440	0.990163	20.0288	109.77	K	HSSSGSASLSQVSPGKETDQTETVSVQSSVL	MSHSSSGSASLSQVSPGK(0.99)ETDQTETVSVQSSVLGK(0.01)
Q8NEN9	532	0.999999	61.835	154.95	K	SLSHSPKRVPTTLSIKPLGAISPVLNRKLAV	RVPTTLSIK(1)PLGAISPVLNR
Q8NEW0	12	0.409775	1.035	62.162	K	____MLPLSIKDDEYKPPKFNLFGKISGWFR	MLPLSIK(0.267)DDEYK(0.41)PPK(0.323)
Q8NEY1	756	0.999874	39.0075	70.986	K	AKAKAVALDSDNISLKSIGSPESTPKNQASH	AVALDSDNISLK(1)SIGSPESTPK
Q8NF91	3606	0.991242	21.6491	80.361	K	TQFNNVVNKLRLMEQKFQQVDEWLKTAEEKV	LMEQK(0.991)FQQVDEWLK(0.002)TAEEK(0.007)
Q8NFC6	2471	0.72669	4.24694	106.37	K	LINAEEKNVLLNSLQKEDKSPETGTAGGSST	NVLLNSLQK(0.727)EDK(0.273)SPETGTAGGSSTASYSAGR
Q8NFC6	2474	0.984858	18.1319	105.37	K	AEEKNVLLNSLQKEDKSPETGTAGGSSTASY	NVLLNSLQK(0.015)EDK(0.985)SPETGTAGGSSTASYSAGR
Q8NFJ5	348	0.864755	8.5338	143.58	K	KEFSIPRAHAWPSPYKDYEVKKEGS______	AH(0.014)AWPSPYK(0.865)DYEVK(0.121)
Q8NFJ5	353	0.447137	1.28661	175.6	K	PRAHAWPSPYKDYEVKKEGS___________	AH(0.002)AWPSPYK(0.218)DYEVK(0.447)K(0.332)
Q8NFQ8	110	0.922804	11.8962	115.84	K	LDGGKGHHLPSENLGKEPLDPDPSHSPSDKV	GH(0.001)H(0.003)LPSENLGK(0.923)EPLDPDPSH(0.06)SPSDK(0.013)VGR
Q8NHV4	471	0.78725	6.84942	71.909	K	VLHSSPLNVFMGSPGKEENENRDLTAESKKI	K(0.05)NPVTSSTSVLH(0.163)SSPLNVFMGSPGK(0.787)EENENR
Q8NI08	189	0.999846	38.1255	53.147	K	PGATVSPSSSDAEYDKLPDADLARKALKPIE	LSSSSPGATVSPSSSDAEYDK(1)LPDADLAR
Q8NI27	1411	0.379402	1.35792	74.763	K	PRSDIPEPEREQKRRKIDTHPSPSHSSTVKD	K(0.379)IDTH(0.278)PSPSH(0.278)SSTVK(0.012)DSLIELK(0.054)
Q8NI27	1218	0.998669	28.7532	118.93	K	GPGGGPSSSSIGSASKSDESSTEETDKSRER	NAVASVQNGPGGGPSSSSIGSASK(0.999)SDESSTEETDK(0.001)SR
Q8NI27	1392	1	162.548	234.79	K	ENVKGGEKTPVSGSLKSPVPRSDIPEPEREQ	TPVSGSLK(1)SPVPR
Q8NI77	683	0.960497	13.9512	71.002	K	RRKLMPSPLKGQHTLKSPPSQSVQLNDSLSK	GQH(0.001)TLK(0.96)SPPSQSVQLNDSLSK(0.039)
Q8NI77	677	0.895956	9.35074	96.489	K	PTEKRTRRKLMPSPLKGQHTLKSPPSQSVQL	LMPSPLK(0.896)GQHTLK(0.104)
Q8TAP6	85	1	75.0768	114.84	K	NFVTDSVEQELPSSPKQPICFDRQSTLKKTN	ELNFVTDSVEQELPSSPK(1)QPICFDR
Q8TAT6	16	0.999929	41.4637	58.831	K	MAESIIIRVQSPDGVKRITATKRETAATFLK	MAESIIIR(0.999)VQSPDGVK(1)R(0.001)
Q8TAV0	190	0.925289	12.6134	48.655	K	LSTSSIQNEIPKKKSKFESITTNGDSFSPDL	SK(0.925)FESITTNGDSFSPDLALDSPGTDH(0.024)FVIIAQLK(0.051)
Q8TBF4	141	0.799432	6.00519	67.405	K	GEREPPKKKEKKKKKKAPEPEEEIEEVEESE	K(0.799)APEPEEEIEEVEESEDEGEDPALDSLSQAIAFQQAK(0.201)
Q8TBF4	140	0.756008	5.06856	67.385	K	LGEREPPKKKEKKKKKKAPEPEEEIEEVEES	K(0.756)K(0.235)APEPEEEIEEVEESEDEGEDPALDSLSQAIAFQQAK(0.009)
Q8TBY8	352	1	69.716	69.716	K	EAVSEQKRNIMKDMMKLELDLHGLREETSAH	DMMK(1)LELDLH(1)GLR(1)
Q8TCC7	311	0.999929	41.5022	100.73	K	ELKLNLQKEISLAKAKYTASDLFRIPMLRRM	AK(1)YTASDLFRIPMLR
Q8TDD1	58	0.999826	37.6552	103.9	K	DGEFEIQAEDDARARKLGPGRPLPTFPTSEC	K(1)LGPGRPLPTFPTSECTSDVEPDTR
Q8TDI7	9	0.977048	17.198	87.298	K	_______MSHQVKGLKEEARGGVKGRVKSGS	MSHQVK(0.004)GLK(0.977)EEAR(0.019)
Q8TDM6	870	0.905903	10.1103	80.877	K	RKEPGPPGGSSSFLHKPFPGGPLQVCPQACP	K(0.006)EPGPPGGSSSFLH(0.088)K(0.906)PFPGGPLQVCPQACPSASER
Q8TDM6	935	0.943708	12.2439	86.771	K	ETEVGPCGVGEASLDKADSEGSNSGGTWPKA	RPLLPFETEVGPCGVGEASLDK(0.944)ADSEGSNSGGTWPK(0.056)
Q8TDM6	987	0.971792	16.087	77.894	K	SIFDPNTFKRPQTPPKIDYLLPGPGPAHSPQ	R(0.024)PQTPPK(0.972)IDYLLPGPGPAHSPQPSK(0.004)
Q8TDW5	354	1	86.3794	92.238	K	DTVSIRSKSVPGALDKDSLEETEESIDALVS	SVPGALDK(1)DSLEETEESIDALVSSQLSTNTHR
Q8TDY2	429	0.867293	5.72335	49.618	K	LSHANQLMIMLQNHRKLLDIKQKCTTAKQEL	DASVLPDLCLSH(0.037)ANQLMIMLQNH(0.544)R(0.544)K(0.867)LLDIK(0.008)
Q8TEK3	428	0.527083	0.520547	83.741	K	RPKKMNTANPERKPKKNQTALDALHAQTVSQ	K(0.527)NQTALDALH(0.468)AQTVSQTAASSPQDAYR(0.005)
Q8TEM1	1872	1	90.0832	105.46	K	AASSPTSPNALPPARKASPPSGLWSPAYASH	K(1)ASPPSGLWSPAYASH
Q8TEQ0	375	0.999988	50.2142	134.34	K	NSSGRKHRGHSESPEKPLEGNTCLSQMHSWA	GHSESPEK(1)PLEGNTCLSQMHSWAPLK
Q8TEU7	1222	0.490608	0.0582186	63.881	K	LPQKVLGTTEEISGKKHTEDTISVASSLHSS	K(0.491)H(0.024)TEDTISVASSLH(0.484)SSPPASPQGSPHK(0.001)
Q8TEW0	886	1	106.803	115.31	K	AGSPSRDVGPSLGLKKSSSLESLQTAVAEVT	K(1)SSSLESLQTAVAEVTLNGDIPFHRPR
Q8TF01	218	0.999387	32.1246	171.52	K	SSFRDRQRSPIALPVKQEPPQIDAVKRRTLP	QRSPIALPVK(0.999)QEPPQIDAVK(0.001)
Q8TF72	438	0.530002	0.671715	75.064	K	LKSPFIEEQLHTVLEKSPENSPPVKPKHNYT	SPFIEEQLH(0.91)TVLEK(0.53)SPENSPPVK(0.454)PK(0.105)
Q8WUM0	35	1	76.0275	119.62	K	LAGLGPGSTPRTASRKGLPLGSAVSSPVLFS	K(1)GLPLGSAVSSPVLFSPVGR
Q8WUY3	687	0.54032	0.863405	61.082	K	SSSEQESVFQSPESWKEHKPSSIDRRASDSV	NIADAWSSSEQESVFQSPESWK(0.54)EH(0.017)K(0.443)PSSIDR
Q8WVN6	181	1	89.8046	89.805	K	FAWYRCRCSQQRREKKFFLLEPQMKVAALRA	K(1)FFLLEPQMK(1)
Q8WWH4	208	0.998515	28.5151	77.192	K	GHKNIVLKLLELGANKMLQTKDGKMPSEIAK	LLELGANK(0.999)MLQTK(0.001)DGK
Q8WWI1	1476	0.999997	55.7753	164.93	K	SGAELERQQILQEMRKRTPLHNDNSWIRQRS	K(1)RTPLHNDNSWIR
Q8WWI1	1496	1	93.2067	110.35	K	HNDNSWIRQRSASVNKEPVSLPGIMRRGESL	SASVNK(1)EPVSLPGIMR
Q8WWM7	606	0.783174	5.60724	45.666	K	PMGSPVSSKTESVSDKEDKPPLAPSGGTEGP	TESVSDK(0.783)EDK(0.215)PPLAPSGGTEGPEQPPPPCPSQTGSPPVGLIK(0.001)
Q8WWY3	470	0.772178	5.30122	58.581	K	TPLQGLEIVNPQAAEKKVAEANQKYFSSMAE	SSGTASSVAFTPLQGLEIVNPQAAEK(0.772)K(0.228)
Q8WX92	555	1	60.4741	73.831	K	LYSQLGEKLEQLDHRKPSPAQAAETPALELP	K(1)PSPAQAAETPALELPLPSVPAPAPL
Q8WX93	644	0.973639	16.9562	87.863	K	SNKSLPTPAVLLSPTKEPPPLLAKPKLDPLK	SLPTPAVLLSPTK(0.974)EPPPLLAK(0.007)PK(0.02)
Q8WX93	652	0.463454	0	66.282	K	AVLLSPTKEPPPLLAKPKLDPLKLQQLQNQI	SLPTPAVLLSPTK(0.463)EPPPLLAK(0.463)PK(0.073)
Q8WXH0	6380	0.930945	11.4299	63.491	K	TDMEDPREIQTDSWRKRGESEEPSSPQSLCH	K(0.931)R(0.067)GESEEPSSPQSLCH(0.002)LVAPGHER
Q8WXH0	6358	0.994228	22.3695	62.052	K	FHRRLTSCTPGLEDEKEASENETDMEDPREI	LTSCTPGLEDEK(0.994)EASENETDMEDPR(0.006)EIQTDSWR
Q8WY36	242	0.68755	3.42754	74	K	GTCRPDVSESPELRQKSPLFQFAEISSSTSH	QK(0.688)SPLFQFAEISSSTSHSDASTK(0.312)
Q8WY36	158	0.99655	24.6074	137.39	K	ANPGYKWCPTTNKPVKSPTPTVNPRKKLWAF	WCPTTNK(0.003)PVK(0.997)SPTPTVNPR
Q8WYA6	388	1	88.5841	120.84	K	FVDILGLRTIFPLFMKSPRKIKKVGTTEKEH	TIFPLFMK(1)SPR
Q8WYP3	601	0.963795	14.0854	75.566	K	QIDVVLEKAMHKCILKPLKGHVEAMLKDFHM	AMH(0.964)K(0.073)CILK(0.964)PLK(1)
Q8WYP5	1339	0.530358	0.52803	49.587	K	APSPEDLEETVFTASKPKSSSTALTTNVTEQ	GNSSVSITSDETTLEYQDAPSPEDLEETVFTASK(0.53)PK(0.47)
Q8WYP5	1527	0.973744	15.6926	77.401	K	DSPPDTQEIHVIEQEKLEAQDSGEEARNLSF	LPISDSPPDTQEIH(0.026)VIEQEK(0.974)LEAQDSGEEAR
Q8WYP5	1141	1	119.971	162.61	K	PRPSQCSEFIQQSSMKSPLYLVSRSLPSSSQ	PSQCSEFIQQSSMK(1)SPLYLVSR
Q8WYP5	1158	1	183.643	212.43	K	PLYLVSRSLPSSSQLKGSPQAISRASELHLL	SLPSSSQLK(1)GSPQAISR
Q8WYP5	1286	0.953678	13.1685	160.2	K	KSKDRTTSFFLNSPEKEHQEMDEGSQSLEKL	TTSFFLNSPEK(0.954)EHQEMDEGSQSLEK(0.046)
Q8WZ42	12731	0.998306	27.5534	43.732	K	PLTASPDCEIIEDGKKHILILHNCQLGMTGE	K(0.998)H(0.998)ILILH(0.997)NCQLGMTGEVSFQAANAK(0.971)SAANLK(0.036)
Q8WZ42	12755	0.970644	15.1649	43.732	K	QLGMTGEVSFQAANAKSAANLKVKELPLIFI	K(0.998)H(0.998)ILILH(0.997)NCQLGMTGEVSFQAANAK(0.971)SAANLK(0.036)
Q92503	245	0.813772	6.40458	104.15	K	PVVGTPDDKLDADYIKRYLGDLTPLQESCLI	EGLSGDALSSPSAPEPVVGTPDDK(0.186)LDADYIK(0.814)R
Q92538	1770	1	89.4232	178.05	K	PPPEIPSELGACDFEKPESPRAASSSSPGSP	TPGHPPPPEIPSELGACDFEK(1)PESPR
Q92540	780	0.999901	43.4586	139.28	K	TQQQQSPTKAVPALGKSPPHHSGFQQYQQAD	AVPALGK(1)SPPHHSGFQQYQQADASK
Q92547	164	1	91.318	91.318	K	GEVGSKKYLVAANLKKPILLPSWIKTLWEKS	K(1)PILLPSWIK(1)
Q92560	368	0.808094	6.24373	93.712	K	IVQRLPAFLDNHNYAKSPMQEEEDLAAGVGR	LPAFLDNH(0.192)NYAK(0.808)SPMQEEEDLAAGVGR
Q92610	83	0.774316	5.35418	86.213	K	VIVKNTSRQESFEAEKDHITPSLLHNGFRGS	QESFEAEK(0.774)DH(0.226)ITPSLLHNGFR
Q92615	521	0.989528	19.7541	61.438	K	EEKFTSSQTQSPTPPKPPSPSFELGLSSFPP	FTSSQTQSPTPPK(0.99)PPSPSFELGLSSFPPLPGAAGNLK(0.01)
Q92621	1150	0.999653	36.5641	101.74	K	HTQRLLHLLLDDMPVKPYSDGEGGIEDENRS	LLHLLLDDMPVK(1)PYSDGEGGIEDENR
Q92625	625	0.999999	62.2804	78.352	K	TSKPKAELKLSRSLSKSDSDLLTCSPTEDAT	SLSK(1)SDSDLLTCSPTEDATMGSR
Q92667	448	0.866573	10.3775	73.296	K	KTYVSCLKSLLSSPTKDSKPNISAHHISLAS	SLLSSPTK(0.867)DSK(0.079)PNISAH(0.025)H(0.029)ISLASCLALTTPSEELPDR
Q92667	451	0.479506	1.54066	82.058	K	VSCLKSLLSSPTKDSKPNISAHHISLASCLA	SLLSSPTK(0.104)DSK(0.48)PNISAH(0.081)H(0.336)ISLASCLALTTPSEELPDR
Q92734	155	0.997857	25.8799	66.331	K	TVDGREEKSASDSSGKQSTQVMAASMSAFDP	SASDSSGK(0.998)QSTQVMAASMSAFDPLK(0.17)NQDEINK(0.832)
Q92766	164	0.999701	35.2668	122.65	K	KDPNSATATAPPSPLKRRRLSSKRKLSHDAE	IHEKDPNSATATAPPSPLK(1)R
Q92766	41	0.971292	15.2935	79.445	K	SVGKVTENGGSPQGIKSPSKPPGPNRIGRRN	VTENGGSPQGIK(0.971)SPSK(0.029)PPGPNR
Q92769	404	0.868047	8.54096	86.073	K	AVHEDSGDEDGEDPDKRISIRASDKRIACDE	MLPH(0.01)APGVQMQAIPEDAVH(0.121)EDSGDEDGEDPDK(0.868)R
Q92785	241	0.999957	45.7292	124.31	K	YHYAHSHLAEEEGEDKEDSQPPTPVSQRSEE	NRPGLSYHYAHSHLAEEEGEDK(1)EDSQPPTPVSQR
Q92794	1860	1	103.127	136.26	K	LQGQMPVKGHISIRSKSAPLPSAAAHQQQLY	SK(1)SAPLPSAAAHQQQLYGR
Q92797	1160	1	120.781	148.89	K	QEKALKRQLEEEQKLKPGGVGAPSSSSPSPS	LK(1)PGGVGAPSSSSPSPSPSAR
Q92878	618	0.774085	5.34844	121.9	K	SSEQNKNHINNELKRKEEQLSSYEDKLFDVC	K(0.774)EEQLSSYEDK(0.226)LFDVCGSQDFESDLDR
Q92878	646	0.5447	0.778721	84.214	K	DVCGSQDFESDLDRLKEEIEKSSKQRAMLAG	LFDVCGSQDFESDLDRLK(0.545)EEIEK(0.455)
Q92890	250	0.895248	9.31781	119.45	K	LDGKKKGVEPSPSPIKPGDIKRGIPNYEFKL	GVEPSPSPIK(0.895)PGDIK(0.105)R
Q92925	206	0.999481	32.8433	91.1	K	KRKLRIYISNTFSPSKAEGDSAGTAGTPGGT	IYISNTFSPSK(0.999)AEGDSAGTAGTPGGTPAGDK(0.001)
Q93098	217	0.958296	13.6133	76.051	K	REVGAHLKEKYHAALKVDLLQGAGNSAAGRG	YH(0.042)AALK(0.958)VDLLQGAGNSAAGR
Q96A49	247	0.732788	4.39898	69.289	K	NGREQDLPLAEAVRPKTPPVVIKSQLKTQED	EQDLPLAEAVR(0.266)PK(0.733)TPPVVIK(0.001)
Q96AC1	153	0.753889	4.86666	92.409	K	LSLLKKPRDPTKKKKKKLDDQSEDEALELEG	K(0.754)K(0.246)LDDQSEDEALELEGPLITPGSGSIYSSPGLYSK
Q96AC1	154	0.999411	32.2951	75.036	K	SLLKKPRDPTKKKKKKLDDQSEDEALELEGP	K(0.999)LDDQSEDEALELEGPLITPGSGSIYSSPGLYSK(0.001)
Q96AC1	341	0.99527	24.2336	124.96	K	KLSIMTSENHLNNSDKEVDEVDAALSDLEIT	LSIMTSENH(0.001)LNNSDK(0.995)EVDEVDAALSDLEITLEGGK(0.004)
Q96AG4	14	0.848705	7.48933	91.926	K	__MTKAGSKGGNLRDKLDGNELDLSLSDLNE	DK(0.849)LDGNELDLSLSDLNEVPVK(0.151)
Q96B01	326	1	70.3534	153.2	K	GGSRSSSSPLVVVSVKSPNQSLRLGLSRLAR	SSSSPLVVVSVK(1)SPNQSLR
Q96B97	516	0.918516	12.6688	87.674	K	LSSPDIFDSPSPEEDKEEHISLAHRGVDASK	R(0.031)PPSQSLTSSSLSSPDIFDSPSPEEDK(0.919)EEH(0.05)ISLAH(0.001)R
Q96BK5	154	0.764442	5.11247	66.72	K	SKTDLDCIFGKRQSKKTPEGDASPSTPEENE	K(0.764)TPEGDASPSTPEENETTTTSAFTIQEYFAK(0.236)
Q96BY7	1881	0.994704	22.3992	55.686	K	KLFSYAITEWLNDIKKNQLPGILGGVGPMHS	K(0.995)NQLPGILGGVGPMH(0.925)SLVQLVQGLK(0.08)
Q96D71	487	0.802446	6.96568	131.3	K	RTGSDHTNPTSPLLVKPSDLLEENKINSSVK	TGSDHTNPTSPLLVK(0.802)PSDLLEENK(0.036)INSSVK(0.161)
Q96ER9	129	0.915879	9.40491	82.202	K	GLVREAREDLEVHQAKLKEVRDRLDRVSRED	EAR(1)EDLEVH(0.818)QAK(0.916)LK(0.267)
Q96EV2	735	1	143.102	260.58	K	EMSSSRCSATPSAQVKPIVSASPPSRAVAGS	CSATPSAQVK(1)PIVSASPPSR
Q96EZ8	292	0.576643	1.342	116.87	K	QVLNFSDAEDLIDDSKLKDMRDEVLEHELMV	GDQVLNFSDAEDLIDDSK(0.577)LK(0.423)
Q96F45	252	0.346509	0	63.534	K	SPGGMLSSAGGAPEGKDDKKDTDVGGGGKGT	TGSPSSSASACSPGGMLSSAGGAPEGK(0.347)DDK(0.347)K(0.307)
Q96F45	255	0.346509	0	63.534	K	GMLSSAGGAPEGKDDKKDTDVGGGGKGTGGA	TGSPSSSASACSPGGMLSSAGGAPEGK(0.347)DDK(0.347)K(0.307)
Q96F63	209	0.861682	7.97555	88.708	K	TQEELSARTPTHQPPKPGSPGRPACPLSNLL	TPTH(0.001)QPPK(0.862)PGSPGR(0.137)PACPLSNLLLQSYEER
Q96F81	1148	0.528556	3.2922	83.312	K	CLGPQGTCGQIPLPKKLQCSAFSHALSTSPS	K(0.529)LQCSAFSH(0.01)ALSTSPSDK(0.248)GQSK(0.214)
Q96FS4	891	0.916028	10.3785	79.112	K	PLTQDRPGSPSGSEDKGNPAPELRASFLPRT	PSVPSADSETPLTQDR(0.084)PGSPSGSEDK(0.916)GNPAPELR
Q96FV9	47	0.667697	3.4403	89.353	K	PLLSTFSQVPGSENEKKCTLDQAFRGILEEE	NIK(0.03)PLLSTFSQVPGSENEK(0.668)K(0.302)
Q96GQ5	433	0.975325	15.983	66.023	K	VVVKETHEVLDMLFPKFLKGLQDAGWKTEKH	ETHEVLDMLFPK(0.975)FLK(0.025)
Q96GV9	33	0.931583	11.3406	117.8	K	FPGAEANSPGKAEAEKPRCSSTPCSPMRRTV	STLTTLPFPGAEANSPGK(0.068)AEAEK(0.932)PR
Q96HC4	359	0.819972	6.92025	66.467	K	TAAAAFKPVGSTGVIKSPSWQRPNQGVPSTG	PVGSTGVIK(0.82)SPSWQR(0.167)PNQGVPSTGR(0.013)
Q96II8	519	0.831571	6.93497	63.225	K	AVLDFVKQKASQSPQKQHPLLDGVDGECPFP	ASQSPQK(0.832)QH(0.168)PLLDGVDGECPFPSRR
Q96II8	422	1	67.5055	169.17	K	AYIEQRRISHEGSPVKPVAIREFQKTEDMRR	RISHEGSPVK(1)PVAIR
Q96IY1	227	0.77408	5.34832	96.312	K	HLQRIHQEVFSSCHRKPDAKPENFITQIETT	K(0.774)PDAK(0.226)PENFITQIETTPTETASR
Q96JG6	501	0.992115	19.5993	103.41	K	FKFMEQSRSPSVSPSKQPVSTSSKTVTLFEQ	FMEQSR(0.281)SPSVSPSK(0.992)QPVSTSSK(0.727)
Q96JM3	441	1	122.71	273.99	K	LSPEIRSPAGSPELRKPSGSPDLWKLSPDQR	K(1)PSGSPDLWK(1)LSPDQR
Q96JM3	450	1	115.663	174.59	K	GSPELRKPSGSPDLWKLSPDQRKTSPASLDF	K(1)PSGSPDLWK(1)LSPDQR
Q96JM3	280	1	115.532	222.11	K	PESRKSARTTSPEPRKPSPSESPEPWKPFPA	K(1)PSPSESPEPWK(1)PFPAVSPEPR
Q96JM3	291	1	101.548	165.19	K	PEPRKPSPSESPEPWKPFPAVSPEPRRPAPA	K(1)PSPSESPEPWK(1)PFPAVSPEPR
Q96JM3	399	0.958547	13.6406	126.71	K	PASPESWKSGPPELRKTAPTLSPEHWKAVPP	K(0.959)TAPTLSPEHWK(0.041)
Q96JM3	349	0.99236	21.4224	70.109	K	WKPAKPAPSVSPGPWKPIPSVSPGPWKPTPS	PAPSVSPGPWK(0.992)PIPSVSPGPWK(0.007)PTPSVSSASWK
Q96JM3	313	1	88.4304	169.6	K	PEPRRPAPAVSPGSWKPGPPGSPRPWKSNPS	RPAPAVSPGSWK(1)PGPPGSPR(1)
Q96JM3	381	1	74.3245	74.324	K	SSASWKSSSVSPSSWKSPPASPESWKSGPPE	SSSVSPSSWK(1)SPPASPESWK(1)
Q96K21	142	0.997396	25.8314	110.84	K	QCHEVLTRGSSANASKWSPPQNYKKRVAALE	GSSANASK(0.997)WSPPQNYK(0.003)
Q96KB5	64	0.63113	2.33248	141.1	K	MKRSPRGLSHSPWAVKKINPICNDHYRSVYQ	GLSHSPWAVK(0.631)K(0.369)
Q96KG9	687	0.999964	44.3858	48.576	K	VSRASQVSNSDHKSSKSPESDWSSWEAEGSW	SSK(1)SPESDWSSWEAEGSWEQGWQEPSSQEPPPDGTR
Q96KQ7	139	1	109.968	144.15	K	GSCPSRAKMSMTGAGKSPPSVQSLAMRLLSM	MSMTGAGK(1)SPPSVQSLAMR
Q96L91	350	1	79.9167	83.045	K	PLTSVGNTGMKKVPKKLEEIPPASPEMAQMR	K(1)LEEIPPASPEMAQMR
Q96LZ7	119	1	108.279	223.77	K	EEYIQDELGGKITVHKISPQHRARKRRLPTI	ITVHK(1)ISPQHR
Q96MW1	148	0.881398	9.77542	112.13	K	AQYADVTDEEDEADEKDDSGATTMNIGSDKL	K(0.026)AALLAQYADVTDEEDEADEK(0.881)DDSGATTMNIGSDK(0.093)
Q96MW1	128	0.85647	8.16965	80.073	K	IVVKPRMVSEEEKQRKAALLAQYADVTDEED	K(0.856)AALLAQYADVTDEEDEADEK(0.131)DDSGATTMNIGSDK(0.013)
Q96N67	21	0.988958	19.5214	131.35	K	AFAQKISRTVAAEVRKQISGQYSGSPQLLKN	K(0.989)QISGQYSGSPQLLK(0.011)
Q96NB3	344	1	63.0721	80.314	K	KNKLKEILTIKELQKKEEENADSDDEGELQD	K(1)EEENADSDDEGELQDLLSQDWR
Q96NW4	209	0.996175	26.7457	53.96	K	HLKMLAKQEAQMNLMKQAVEIYVHHEIYNLI	QEAQMNLMK(0.996)QAVEIYVH(0.119)H(0.424)EIYNLIFK(0.461)
Q96P16	144	1	80.9235	114.52	K	LYGDKKPRKRTYEQIKVDENENCSSLGSPSE	TYEQIK(1)VDENENCSSLGSPSEPPQTLDLVR
Q96P44	696	1	59.634	59.634	K	SPGEPGYMGLPGIQGKKGDKGNQGEKGIQGQ	GEPGATGSPGEPGYMGLPGIQGK(1)K(1)GDK(1)
Q96P44	697	1	59.634	59.634	K	PGEPGYMGLPGIQGKKGDKGNQGEKGIQGQK	GEPGATGSPGEPGYMGLPGIQGK(1)K(1)GDK(1)
Q96PC5	721	0.91991	10.6827	102.5	K	LVQKEYEGYEVESSLKDASFEKEATEAQSLE	EYEGYEVESSLK(0.92)DASFEK(0.079)EATEAQSLEATCEK(0.001)
Q96PU5	489	0.613739	2.0111	100.08	K	LSNPQSPQPSPYNSPKPQHKVTQSFLPPGWE	DTLSNPQSPQPSPYNSPK(0.614)PQHK(0.386)
Q96QC0	310	0.976051	17.0244	126.34	K	LNSAPVPGIKIKKKKKVLSPTAAKPSPFEGK	K(0.976)VLSPTAAK(0.019)PSPFEGK(0.005)
Q96QC0	318	0.921469	10.6944	130.47	K	IKIKKKKKVLSPTAAKPSPFEGKTSTEPSTA	VLSPTAAK(0.921)PSPFEGK(0.079)
Q96RL1	680	0.999957	46.5202	117.53	K	MQSSFTRRDLNESPVKSFVSISEATDCLVDF	DLNESPVK(1)SFVSISEATDCLVDFKK
Q96S90	103	0.815125	9.1901	73.936	K	TEPRDLFNGLDSEEEKDGEEKVHPSNSEVWP	DLFNGLDSEEEK(0.815)DGEEK(0.087)VH(0.098)PSNSEVWPHSTER
Q96ST3	252	0.978906	16.6672	92.623	K	APAQPAPQPPPAKVSKPSQLQAHTPASQQTP	VSK(0.979)PSQLQAH(0.021)TPASQQTPPLPPYASPR
Q96T23	400	0.5	0	99.834	K	KKREIKLSDDFDSPVKGPLCKSVTPTKEFLK	LSDDFDSPVK(0.5)GPLCK(0.5)
Q96T37	769	0.997781	26.6008	129.06	K	PSTSTASSKLKSPSQKQDGGTAPVASASPKL	LK(0.002)SPSQK(0.998)QDGGTAPVASASPK
Q96T37	263	1	117.494	184.6	K	EAVYVSRRRSRSPLDKDTYPPSASVVGASVG	SR(1)SPLDK(1)DTYPPSASVVGASVGGHR
Q96T58	1064	0.999979	46.8151	82.476	K	SKKIKLDRLNTVASPKDCQELASISVGSGSR	LNTVASPK(1)DCQELASISVGSGSRPSSDLQAR
Q96T58	1825	0.983633	17.7888	95.365	K	PVAAKDKKPNKSKRSKTPVQAAAVSIVEKPV	SK(0.984)TPVQAAAVSIVEK(0.016)PVTR
Q96T60	130	0.910386	10.0719	64.144	K	QPDTPPGTPLVSQDEKRDAELPKKRMRKSNP	WEETR(0.09)TPESQPDTPPGTPLVSQDEK(0.91)R
Q96TC7	210	1	88.2941	91.819	K	DGEDEVSCETVKMGRKDSLDLEEEAASGASS	K(1)DSLDLEEEAASGASSALEAGGSSGLEDVLPLLQQADELHR
Q99459	380	0.999863	38.6322	75.897	K	EAQNLMALTNVDTPLKGGLNTPLHESDFSGV	ILQEAQNLMALTNVDTPLK(1)GGLNTPLH(1)ESDFSGVTPQR
Q99460	292	0.966364	14.5834	70.632	K	SVPGSTNTGTVPGSEKDSDSMETEEKTSSAF	TVGTPIASVPGSTNTGTVPGSEK(0.966)DSDSMETEEK(0.034)
Q99543	56	0.499587	0	75.695	K	RRNRNASASFQELEDKKELSEESEDEELQLE	NASASFQELEDK(0.5)K(0.5)ELSEESEDEELQLEEFPMLK(0.001)
Q99543	57	0.499587	0	75.695	K	RNRNASASFQELEDKKELSEESEDEELQLEE	NASASFQELEDK(0.5)K(0.5)ELSEESEDEELQLEEFPMLK(0.001)
Q99549	452	0.834849	7.03726	130.36	K	GLKTLKEIRNAFDLFKLTPEEKNDVSENNRK	NAFDLFK(0.835)LTPEEK(0.165)NDVSENNR
Q99549	81	0.997955	26.8951	69.986	K	DMKTEGGKVLYKVRWKGYTSDDDTWEPEIHL	WK(0.998)GYTSDDDTWEPEIHLEDCK(0.002)
Q99567	41	1	129.192	144.27	K	RLREGLKNQSPTEAEKPASSSLPSSPPPQLL	NQSPTEAEK(1)PASSSLPSSPPPQLLTR
Q99569	774	0.976768	18.5987	79.236	K	QARLLGLNELDDLLGKESPSKDSEPSCWGKK	LLGLNELDDLLGK(0.977)ESPSK(0.01)DSEPSCWGK(0.013)
Q99575	448	0.508018	0.253836	44.555	K	RLIGPLSHSILTEAIKAASVHTVGEDTEETP	LIGPLSH(0.479)SILTEAIK(0.508)AASVH(0.013)TVGEDTEETPH(1)R(1)
Q99700	858	0.999994	51.8989	65.641	K	SFIENSSSNCTSGSSKPNSPSISPSILSNTE	DSFIENSSSNCTSGSSK(1)PNSPSISPSILSNTEHK(1)
Q99728	369	0.998948	29.7759	76.237	K	SENIPLPECSSPPSCKRKVGGTSGRKNSNMS	QTVPSENIPLPECSSPPSCK(0.999)R(0.001)
Q99741	109	0.63726	2.44721	129.36	K	RRLVFDNQLTIKSPSKRELAKVHQNKILSSV	LVFDNQLTIK(0.363)SPSK(0.637)R
Q9BPW9	98	0.93069	11.2801	114.71	K	DVTDPENVKRTAQWVKNQVGEKGLWGLINNA	TAQWVK(0.931)NQVGEK(0.069)
Q9BQA1	3	1	102.169	206.46	K	_____________MRKETPPPLVPPAAREWN	K(1)ETPPPLVPPAAR
Q9BQG0	1289	0.941022	12.0291	211.83	K	QKQHQKALPKKGVLGKSPLSALARKKARLSL	K(0.059)GVLGK(0.941)SPLSALAR
Q9BQG0	1254	0.884921	11.5384	72.399	K	TRSPSTPAKSPKLQKKNQKPSQVNGAPGSPT	K(0.885)NQK(0.053)PSQVNGAPGSPTEPAGQK(0.062)
Q9BQQ3	212	1	45.8242	45.824	K	GYLHRIPTQPPSYHKKPPGTPPPSALPLGAP	K(1)PPGTPPPSALPLGAPPPDALPPGPTPEDSPSLETGSR(1)
Q9BRG2	143	1	88.6106	123.38	K	TLMDGPARIEPLRARKWSNSQPADLAHMGRS	K(1)WSNSQPADLAHMGR
Q9BRZ2	468	0.999999	60.0585	71.651	K	RGGRPNKKKKFKGRLKSISREPSPALGPNLD	LK(1)SISR(1)EPSPALGPNLDGSGLLPR
Q9BTA9	503	1	72.2458	118.47	K	GPVSQSATQQPVTADKQQGHEPVSPRSLQRS	QGPVSQSATQQPVTADK(1)QQGHEPVSPR
Q9BVC5	181	0.999983	47.5027	103.92	K	HNNNDAKQNHDLTHRKSPSGPVKSPPLSPVG	K(1)SPSGPVK(0.978)SPPLSPVGTTPVK(0.022)
Q9BVC5	188	0.977772	16.4333	202.61	K	QNHDLTHRKSPSGPVKSPPLSPVGTTPVKLK	K(1)SPSGPVK(0.978)SPPLSPVGTTPVK(0.022)
Q9BVJ6	24	0.9951	23.0763	47.605	K	SLLALSQQEELADLPKDYLLSESEDEGDNDG	LAESLLALSQQEELADLPK(0.995)DYLLSESEDEGDNDGER(0.005)
Q9BWH2	150	1	108.398	206.36	K	VEKDMKKAKEQLKIRKSNQIPTEVRSKAEEV	IRK(1)SNQIPTEVR
Q9BX63	209	1	127.683	162.64	K	KLNSPLEKINSFSPQKPPGHCSRCCCSTKQG	INSFSPQK(1)PPGHCSR
Q9BXB5	222	0.999953	44.8442	187.57	K	HLSVGAPGVVTITHHKSPAAARRAKSQYSGQ	HLSVGAPGVVTITHHK(1)SPAAAR
Q9BXF6	528	0.805917	9.48002	89.721	K	REAKDPTQKPSPHPVKPLSAAPVEGSPDRKQ	DPTQK(0.091)PSPH(0.091)PVK(0.806)PLSAAPVEGSPDR(0.012)
Q9BXK5	312	0.5	0	104.98	K	KSENNSSNSDIVHVEKEEVPEGMEEAAVASV	SENNSSNSDIVH(0.5)VEK(0.5)EEVPEGMEEAAVASVVLPAR
Q9BXP5	413	0.985233	18.2425	130.1	K	EEEWEKPKDAAGLECKPRPLHKTCSLFMRNI	PK(0.015)DAAGLECK(0.985)PR
Q9BXS6	316	0.99572	24.9144	84.159	K	PARKSAHVTVSGGTPKGEAVLGTHKLKTITG	SAHVTVSGGTPK(0.996)GEAVLGTH(0.001)K(0.003)
Q9BY89	1057	0.844881	7.45876	68.453	K	GVVLSGAESLLEHSRKITPPSSPHSLTSTLV	K(0.845)ITPPSSPH(0.152)SLTSTLVSLGHEEALEMAGSK(0.003)
Q9BY89	279	1	81.7313	162.49	K	VGKVPPTPPEKTWVRKPRPLSMDLTARFENK	K(1)PRPLSMDLTAR
Q9BYG3	216	0.945406	12.3847	89.893	K	RQTSTKGQVLRKKKKKVSGTLDTPEKTVDSQ	K(0.945)VSGTLDTPEK(0.055)TVDSQGPTPVCTPTFLER
Q9BYG3	226	0.999995	53.4459	70.112	K	RKKKKKVSGTLDTPEKTVDSQGPTPVCTPTF	VSGTLDTPEK(1)TVDSQGPTPVCTPTFLER
Q9BZ29	1278	0.99954	33.3673	134.76	K	NSLPERNSEKSNSLDKHQQSSTLGNSVVRCD	SNSLDK(1)HQQSSTLGNSVVR
Q9C0A6	1129	0.632867	1.10315	67.88	K	GVQGSSARTPSSPHKKFSPSHSSMSHLEAVS	K(0.633)FSPSH(0.84)SSMSH(0.527)LEAVSPSDSR
Q9C0C2	890	0.476499	1.20491	63.095	K	TYSSRDVSLGDWEFGKRDSLGAYASQDANEQ	DVSLGDWEFGK(0.476)R(0.361)DSLGAYASQDANEQGQDLGK(0.162)
Q9C0C2	173	0.999447	32.6996	124.81	K	ATTVEEILAKMEQPRKEVLASPDRLWGSRLT	K(0.999)EVLASPDR(0.001)LWGSR
Q9C0C9	846	1	78.2874	78.287	K	QLLTGSPTSPTVEPEKPTREKKFLDDIKKLQ	NMTVEQLLTGSPTSPTVEPEK(1)PTR(1)
Q9C0D2	917	0.999964	45.6736	85.777	K	SAKADLGRIQESSPTKNNIAVSSDHHVISQL	IQESSPTK(1)NNIAVSSDHHVISQLQDKR
Q9C0D2	657	0.642927	2.56859	100.69	K	SEHWDQGQRLKLSPNKYQPIQPIQTSKLEQD	LK(0.356)LSPNK(0.643)YQPIQPIQTSK(0.001)
Q9GZP8	27	0.841921	6.21893	50.865	K	TSQKPGVGAGHGGDPKLSPHKVQGRSEAGAG	MEFDLGAALEPTSQK(0.999)PGVGAGH(0.991)GGDPK(0.842)LSPH(0.338)K(0.83)
Q9GZR1	225	0.607833	1.90313	156.72	K	HCSTYQPTPPLSPASKKCLTHLEDLQRNCRQ	HCSTYQPTPPLSPASK(0.608)K(0.392)
Q9GZR2	19	0.958682	13.6553	201.76	K	AKVPASKRAPSSPVAKPGPVKTLTRKKNKKK	RAPSSPVAK(0.959)PGPVK(0.041)
Q9GZU2	5	0.84505	7.36742	70.552	K	___________MLPPKHLSATKPKKSWAPNL	LPPK(0.845)H(0.155)LSATK
Q9H000	121	0.954672	13.2353	107.05	K	TLVLRDRNLSGMAERKTQPSMVSNPGSCSDP	K(0.955)TQPSMVSNPGSCSDPQPSPEMK(0.045)PHSYLDAIR
Q9H0D6	493	0.999934	41.805	59.426	K	TSFTSDGSPSPLGGIKRKAEDSDSEPEPEDN	MQNNSSPSISPNTSFTSDGSPSPLGGIK(1)R
Q9H0G5	15	0.889361	9.08912	114.71	K	_MAIPGRQYGLILPKKTQQLHPVLQKPSVFG	K(0.889)TQQLH(0.001)PVLQK(0.11)PSVFGNDSDDDDETSVSESLQR
Q9H0G5	25	0.999538	33.3536	123.3	K	LILPKKTQQLHPVLQKPSVFGNDSDDDDETS	TQQLHPVLQK(1)PSVFGNDSDDDDETSVSESLQR
Q9H0J9	256	1	111.41	120.64	K	SRVPPLFVPQGTSERKDSSGSVSPNTLSQEE	K(1)DSSGSVSPNTLSQEEGDQICLYHIR
Q9H0R5	551	1	80.7463	80.746	K	ERAQLLEEQEKTLTSKLQEQARVLKERCQGE	TLTSK(1)LQEQAR(1)VLK(1)
Q9H0W7	16	0.589981	1.26154	49.593	K	MPTNCAAAGCATTYNKHINISFHRFPLDPKR	PTNCAAAGCATTYNK(0.59)H(0.455)INISFH(0.863)R(0.091)FPLDPK(0.001)
Q9H0W8	21	1	148.935	201.72	K	HSQPGLYGIERRRRWKEPGSGGPQNLSGPGG	WK(1)EPGSGGPQNLSGPGGR
Q9H1A4	379	1	93.3579	168.02	K	SGVQRFNISSHNQSPKRHSISHSPNSNSNGS	FNISSHNQSPK(1)R
Q9H1A4	695	0.712204	3.93711	70.369	K	NFDFEGSLSPVIAPKKARPSETGSDDDWEYL	K(0.712)AR(0.288)PSETGSDDDWEYLLNSDYHQNVESHLLNR
Q9H1A4	310	0.999222	31.172	79.163	K	VATSSSLTAHLRSLSKGDSPVTSPFQNYSSI	SLSK(0.999)GDSPVTSPFQNYSSIH(0.001)SQSR
Q9H1E3	9	1	63.3084	125.95	K	_______MSRPVRNRKVVDYSQFQESDDADE	K(1)VVDYSQFQESDDADEDYGRDSGPPTK
Q9H1R2	18	1	46.0267	46.027	K	EGVLPGLYLGNFIDAKDLDQLGRNKITHIIS	TEGVLPGLYLGNFIDAK(1)DLDQLGR(1)
Q9H2P0	606	0.745421	7.23569	168.93	K	PKPQPKVQEKADIPVKSSPQAAVPYKKDVGK	ADIPVK(0.745)SSPQAAVPYK(0.141)K(0.114)
Q9H2P0	616	0.382926	0	168.93	K	ADIPVKSSPQAAVPYKKDVGKTLCPLCFSIL	ADIPVK(0.383)SSPQAAVPYK(0.383)K(0.234)
Q9H2P0	731	0.830769	9.18735	63.576	K	KRTYEQMEFPLLKKRKLDDDSDSPSFFEEKP	K(0.831)LDDDSDSPSFFEEK(0.069)PEEPVVLALDPK(0.1)
Q9H2P0	408	0.999973	45.6172	68.589	K	SLQSANASSLSSGQLKSPSLSQSQASRVLGQ	YSLQSANASSLSSGQLK(1)SPSLSQSQASR
Q9H2U2	320	0.973737	15.6912	85.805	K	EEARSLVESVSSSPNKESNEEEQVWHFLGK_	SLVESVSSSPNK(0.974)ESNEEEQVWHFLGK(0.026)
Q9H2Y7	1380	0.972247	15.445	84.107	K	HVPENSDTEQDVLTVKPVRKVKAGKLIKGGK	AAH(0.028)VPENSDTEQDVLTVK(0.972)PVR
Q9H307	377	0.795267	5.89325	131.31	K	MEVKMEEETEVRESEKQQDSQPEEVMDVLEM	ESEK(0.795)QQDSQPEEVMDVLEMVENVK(0.205)
Q9H307	108	0.611306	2.6695	72.99	K	RRESRQESDPEDDDVKKPALQSSVVATSKER	QESDPEDDDVK(0.611)K(0.331)PALQSSVVATSK(0.058)
Q9H307	109	0.483058	0	72.99	K	RESRQESDPEDDDVKKPALQSSVVATSKERT	QESDPEDDDVK(0.483)K(0.483)PALQSSVVATSK(0.034)
Q9H334	82	0.911475	10.1268	97.957	K	QLLLQQQQQQQVSGLKSPKRNDKQPALQVPV	QLLLQQQQQQQVSGLK(0.911)SPK(0.089)
Q9H3R5	131	0.996664	29.8854	52.866	K	LEKISRQSSVLMDNMKHLLELNKLIMKSQQE	QSSVLMDNMK(0.997)H(0.994)LLELNK(0.005)LIMK(0.005)
Q9H425	286	0.99987	38.8486	140.19	K	FSSALHEAAPSQLEGKLPSPDVRQDDGEDTL	ERPQPVQAFSSALHEAAPSQLEGK(1)LPSPDVR
Q9H4A3	1998	0.922781	10.7738	158.53	K	DLEQAVLPAVIPKKEKPELSEPSHLNGPSSD	EK(0.923)PELSEPSH(0.077)LNGPSSDPEAAFLSR
Q9H4A3	1996	0.813718	6.39746	112.17	K	FMDLEQAVLPAVIPKKEKPELSEPSHLNGPS	K(0.814)EK(0.187)PELSEPSH(0.999)LNGPSSDPEAAFLSR
Q9H4G0	647	0.999979	46.7219	184.66	K	AFEDFSRSLPELDRDKSDSDTEGLLFSRDLN	SLPELDRDK(1)SDSDTEGLLFSR
Q9H4H8	476	0.999998	56.3822	67.285	K	GSPVSKMSVSRSSSLKSSSSVSSQGSVASST	SSSLK(1)SSSSVSSQGSVASSTGSPASIR
Q9H4L4	231	0.999993	51.6856	54.841	K	PSGPPMEEDGLRWTPKSPLDPDSGLLSCTLP	WTPK(1)SPLDPDSGLLSCTLPNGFGGQSGPEGER
Q9H4L5	109	1	79.1609	82.417	K	KLHGCIDVGLSVMSVKKSSKCIDLDTEEHIY	LHGCIDVGLSVMSVK(1)K(1)
Q9H4L5	267	0.567273	1.17578	86.222	K	APAINAIQGGSFESPKKEKRSHRRWRSRAIG	TYSAPAINAIQGGSFESPK(0.567)K(0.433)
Q9H4X1	94	0.793175	5.83766	65.223	K	SADSLYRNSFSFSDEKLNSPTDSTPALLSAT	NSFSFSDEK(0.793)LNSPTDSTPALLSATVTPQK(0.207)
Q9H4Z3	32	0.637051	2.50645	69.72	K	SHSPGTSNQSQPCSPKPIRLVQDLPEELVHA	EEASLLSH(0.358)SPGTSNQSQPCSPK(0.637)PIR(0.005)
Q9H582	390	0.996927	25.1108	58.345	K	SPVHTSTFLSNTLKKKCEESDSESPATFSTE	K(0.997)CEESDSESPATFSTEEPSFYPCTK(0.003)
Q9H5J0	532	1	63.8235	133.94	K	RHIRKAHNEDLAKRSKPDPEVGPLLGVQPLP	SK(1)PDPEVGPLLGVQPLPGSPTADR
Q9H694	784	0.999964	45.9513	83.776	K	AETIKELRRANHVSYKPTMTTTYEGSSMSLS	ANHVSYK(1)PTMTTTYEGSSMSLSR
Q9H6F5	64	0.999763	37.2725	128.74	K	PSVQRAGLGSPERPPKTSPGSPRLQQGAGLE	AGLGSPERPPK(1)TSPGSPR
Q9H6S3	461	0.5	0	108.88	K	EEVSPVSRQSIRNSQKHSPTSEPTPPGDALP	NSQK(0.5)H(0.5)SPTSEPTPPGDALPPVSSPHTHR
Q9H6Z4	336	1	120.92	124.6	K	FVFGQNMSERVLSPPKLNEVSSDANRENAAA	VLSPPK(1)LNEVSSDANR
Q9H792	895	0.999994	51.9716	170	K	YHAGNLLQRHFTNWTKPTSPTRSTEAESVLH	HFTNWTK(1)PTSPTR
Q9H7C4	129	0.999551	33.477	95.209	K	EPDRIQFVEGPVEPGKPTSPEHVVYEGETVT	IQFVEGPVEPGK(1)PTSPEHVVYEGETVTR
Q9H7N4	553	0.538722	0.674023	57.009	K	GTQPAPPAPASPWDSKKHRSRDRKPGSHASS	EAASSSSGTQPAPPAPASPWDSK(0.539)K(0.461)
Q9H910	18	0.998523	29.4706	67.827	K	QVPDSEGGRAGSRAMKPPGGESSNLFGSPEE	AMK(0.999)PPGGESSNLFGSPEEATPSSR(0.001)PNR
Q9HAU0	854	1	133.907	140.33	K	VKGSHFPVGVVPPRAKSPTPESSTIASYVTL	AK(1)SPTPESSTIASYVTLR
Q9HB07	123	0.867007	8.14194	74.029	K	HQRSFTETMSSLSPGKPWQTKLSSAGLIYLH	SFTETMSSLSPGK(0.867)PWQTK(0.133)
Q9HBE1	272	0.999915	40.6988	74.793	K	SAPPLTGKRGRGRPRKANLLDSMFGSPGGLR	K(1)ANLLDSMFGSPGGLR
Q9HC10	8	0.965761	14.4945	71.031	K	________MALLIHLKTVSELRGRGDRIAKV	MALLIH(0.036)LK(0.966)TVSELR(0.998)
Q9HCD6	1578	0.552073	0.907892	166.21	K	RYQQETSVSQLPGRPKSPLSKMAQRPYQMPQ	YQQETSVSQLPGRPK(0.552)SPLSK(0.448)
Q9HCE1	967	0.999913	41.0885	79.286	K	KLDLQQGQNLLQGLSKLSPSTSGPHSHDYLP	LDLQQGQNLLQGLSK(1)LSPSTSGPHSHDYLPQER
Q9NNX1	380	0.660259	2.88566	115.38	K	TENPGSIRISKPPSPKPMPVIRVVET_____	ISK(0.34)PPSPK(0.66)PMPVIR
Q9NP61	336	0.999983	48.4893	108.3	K	TSDMQTIEQESPIMAKPRKKYNDDSDDSYFT	SVISHSVTSDMQTIEQESPIMAK(1)PR
Q9NP74	366	0.783241	5.57919	102.73	K	WEESNVMQDKDAPSPKPRLSPRETIFGKSEH	LMTPWEESNVMQDK(0.217)DAPSPK(0.783)PR
Q9NP74	252	0.999596	33.9353	91.62	K	VEVEELLRQASERNSKSPTEYHEPVYANPFY	NSK(1)SPTEYHEPVYANPFYR
Q9NPI6	140	0.999928	44.4551	96.312	K	VVEEETRRSQQAARDKQSPSQANGCSDHRPI	DK(1)QSPSQANGCSDHRPIDILEMLSR
Q9NPI6	520	1	78.7615	82.837	K	SVFQQTVTRSSDLERKASSPSPLTIGTPESQ	K(1)ASSPSPLTIGTPESQR
Q9NQW6	563	0.881587	8.71865	55.364	K	REIEMSVDDDDINSSKVINDLFSDVLEEGEL	EIEMSVDDDDINSSK(0.882)VINDLFSDVLEEGELDMEK(0.118)
Q9NR09	576	0.991623	22.1612	55.314	K	NIPFPCLLAGGLLTYKSPATSPISSNSHRSL	HQEQHNIPFPCLLAGGLLTYK(0.992)SPATSPISSNSH(0.006)R(0.002)
Q9NR12	371	0.854099	7.9765	166.47	K	LKMTWHVHCFTCAACKTPIRNRAFYMEEGVP	MTWH(0.01)VH(0.136)CFTCAACK(0.854)TPIR
Q9NR12	278	0.987621	19.3509	82.381	K	QAAAGGVPGGGSNNGKTPVCHQCHKVIRGRY	TSIVQAAAGGVPGGGSNNGK(0.988)TPVCH(0.001)QCHK(0.011)
Q9NR48	921	0.997191	26.472	52.427	K	PVLSVAPFVATESPSKLESESDNHRSSSDFF	MK(0.002)PPVLSVAPFVATESPSK(0.997)LESESDNHR
Q9NRF2	146	0.533732	0.586883	67.641	K	GPLPSSVSSSSTTSSKPKLKKRFSLRSVGRS	SSEDLAGPLPSSVSSSSTTSSK(0.534)PK(0.466)
Q9NRL2	1410	1	79.1969	239.03	K	SKLSLQESESKRRCRKRQSPEPSPVTLGRRS	K(1)RQSPEPSPVTLGR
Q9NRL3	147	0.845284	7.37468	105.06	K	YHKLKFGTDLNQGEKKADVSEQVSNGPVESV	K(0.845)ADVSEQVSNGPVESVTLENSPLVWK(0.155)
Q9NRY4	1148	0.97382	15.705	138.4	K	GSDSEMDTSSLERGRKVSIVSKPVLYRTRCT	K(0.974)VSIVSK(0.026)PVLYR
Q9NRY4	1096	0.999846	38.128	63.848	K	GFDPSDYAEPMDAVVKPRNEEENIYSVPHDS	SVSSSPWLPQDGFDPSDYAEPMDAVVK(1)PR
Q9NS87	1143	0.930386	10.2159	107.32	K	LEHVMDSAAEDPQSPKTPPHFQTHLAKLLET	QLEHVMDSAAEDPQSPK(0.93)TPPH(0.343)FQTH(0.03)LAK(0.696)
Q9NTI5	1196	0.491209	0.757083	85.728	K	HSENEDYTMSSPLPGKKSDKRDDSDLVRSEL	GRLDSSEMDH(0.096)SENEDYTMSSPLPGK(0.491)K(0.413)
Q9NTI5	1136	0.894978	9.3053	107.13	K	TPGKPKTTNVLGAVNKPLSSAGKQSQTKSSR	TTNVLGAVNK(0.895)PLSSAGK(0.105)
Q9NV56	200	1	80.6053	126.48	K	KVLTANSNPSSPSAAKRRRT___________	VLTANSNPSSPSAAK(1)R
Q9NWH9	552	0.98526	18.252	112.44	K	SESIKKSEEKKRISSKSPGHMVILDQTKGDH	ISSK(0.985)SPGHMVILDQTK(0.015)
Q9NXD2	613	0.760527	5.01862	88.329	K	DQELLPRRNSLILKPKPDPAQQTDSQNSDTE	NSLILK(0.239)PK(0.761)PDPAQQTDSQNSDTEQYFR
Q9NYJ8	522	0.999767	36.3394	77.357	K	TDPTLAHVDRISETRKLSMGSDDAAYTQALL	K(1)LSMGSDDAAYTQALLVHQK
Q9NYL2	731	0.999973	45.705	212.03	K	RVSQSALNPHQSPDFKRSPRDLHQPNTIPGM	VSQSALNPHQSPDFK(1)R
Q9NYQ6	2879	0.999779	36.9275	89.072	K	PDQSLAESDSEDPSGKPRLKVETKVSVELHR	GDAVANHVPAGWPDQSLAESDSEDPSGK(1)PR
Q9NZJ0	432	0.995194	23.2663	90.912	K	RPGLVTVTSSQSTPAKAPRAKCNPSNSSPSS	ESR(0.005)PGLVTVTSSQSTPAK(0.995)APR
Q9NZJ4	887	0.999998	57.723	75.968	K	LPSAVLQIMEKMPLQKLCNQITSLLPTHKDA	MPLQK(1)LCNQITSLLPTHK
Q9NZN4	466	0.372581	0.384499	107.09	K	SKYDEIFYNLAPADGKLSGSKAKTWMVGTKL	SK(0.341)YDEIFYNLAPADGK(0.373)LSGSK(0.286)
Q9P0U3	153	1	122.459	206.63	K	NHHCHVSAYEKSFPIKPVPSPSWSGSCRRSL	SFPIK(1)PVPSPSWSGSCR
Q9P0U4	141	0.999684	39.4515	74.408	K	TGVGAMLARGSASPHKSSPQPLVATPSQHHQ	GSASPH(1)K(1)SSPQPLVATPSQHHQQQQQQIK
Q9P0V3	644	0.982733	17.5711	88.036	K	NEVGKIILSPFATTTKYPTFQDRPVSSLKFG	IILSPFATTTK(0.983)YPTFQDRPVSSLK(0.017)
Q9P0V3	137	0.972431	15.4744	57.02	K	SGMIDNLPDSPDEVAKELELLGGWTDDKKVP	NSTLSDSGMIDNLPDSPDEVAK(0.972)ELELLGGWTDDK(0.028)
Q9P0V3	270	1	96.6127	130.14	K	AKSDAPTSSSFFTGLKSPAPEQFQSREDFRT	SDAPTSSSFFTGLK(1)SPAPEQFQSR
Q9P1T7	147	0.588111	1.54913	145.8	K	HRKIQSSLSVNSDISKKSKVNAVFSQKTGSS	KIQSSLSVNSDISK(0.588)K(0.412)
Q9P206	548	0.583124	1.45755	94.463	K	TLPPKGLAGPPASPGKAQPPKPERVTSLRSP	GLAGPPASPGK(0.583)AQPPK(0.417)PER
Q9P206	553	0.918748	10.5337	92.8	K	GLAGPPASPGKAQPPKPERVTSLRSPGASVS	GLAGPPASPGK(0.081)AQPPK(0.919)PER
Q9P206	969	1	91.5202	116.86	K	QAPKKSPKAPPPVARKPSVGVPPPASPSYPR	K(1)PSVGVPPPASPSYPR
Q9P209	414	0.507152	0.864183	80.453	K	DTREPSPGSHSALPGKKTALQAALLETLLDL	GVTDTR(0.001)EPSPGSH(0.076)SALPGK(0.507)K(0.416)
Q9P219	1589	1	79.1334	126.86	K	ESSRNTSSNSSPLNLKGSSEQLHGRSESFSS	NTSSNSSPLNLK(1)GSSEQLHGR
Q9P225	3363	0.774148	5.34999	49.662	K	CSPSFAIDNFLCNPTKVRDWNIQGLPSDAFS	IWELQVPCSPSFAIDNFLCNPTK(0.774)VR(0.226)
Q9P260	450	0.999782	36.6703	99.943	K	DIHLSISDEADSTIPKENSPNSFPRREREGM	NTDIHLSISDEADSTIPK(1)ENSPNSFPR
Q9P281	649	0.880498	8.67352	57.173	K	KNLLKYSSQALVVGQKAPLVGLGGLKASCIQ	YSSQALVVGQK(0.88)APLVGLGGLK(0.12)
Q9P2B4	520	1	126.664	199.33	K	VTQVLSRFTSQQGPIKPVSPNSSPFGTDYRN	FTSQQGPIK(1)PVSPNSSPFGTDYR
Q9P2B4	465	0.999656	35.366	103.03	K	SYQVGINQRFHAARHKFQSQADQDQQASGLQ	HK(1)FQSQADQDQQASGLQSPPSR
Q9P2B4	567	1	98.2308	208.38	K	PGKVSSPLSPLSPGIKSPTIPRAERGNPPPI	VSSPLSPLSPGIK(1)SPTIPR
Q9P2D0	1056	0.69755	3.63318	126.07	K	RDLQSPDFTTGFHSDKIEAKVKPYVNGTSPV	DLQSPDFTTGFHSDK(0.698)IEAK(0.302)
Q9P2D0	988	0.5	0	89.923	K	TMFKKAKTKAKKKPRKRSDSSGGYNLSDIIQ	K(0.5)R(0.5)SDSSGGYNLSDIIQSPSSTGLLK
Q9P2D0	1062	1	94.2056	122.64	K	DFTTGFHSDKIEAKVKPYVNGTSPVYSREDL	VK(1)PYVNGTSPVYSR
Q9P2D1	1879	0.938471	14.3732	81.682	K	FKDEIDEFANSPSEDKEESMEIHATGKHSES	TPFK(0.034)DEIDEFANSPSEDK(0.938)EESMEIHATGK(0.027)
Q9P2Y5	501	0.999967	46.5701	63.803	K	GGADVGFSGGIPSPDKGHRKRASSENERLQY	QSSIFGGADVGFSGGIPSPDK(1)GHR
Q9UBB9	220	0.999999	61.5852	71.44	K	FPVVDSEEEAEEEFQKELSQWRKDPSGSKKK	TTQSMQDFPVVDSEEEAEEEFQK(1)ELSQWR
Q9UBC1	161	0.960267	13.833	79.181	K	PPWDSAEEEEEDDASKEREWRQKLQGELEDE	NK(0.04)DGETPGQILGWGPPWDSAEEEEEDDASK(0.96)ER
Q9UBC2	233	0.999987	48.9875	77.19	K	VFPGAVPVLPASPPPKDSLRSTPSHGSVSSL	TVFPGAVPVLPASPPPK(1)DSLR
Q9UBF8	276	0.999998	57.9118	222.2	K	PDTGLSPSKRTHQRSKSDATASISLSSNLKR	SK(1)SDATASISLSSNLKR
Q9UDY2	121	1	218.962	287.43	K	RKSGKVAAIVVKRPRKVQVAALQASPPLDQD	K(1)VQVAALQASPPLDQDDR
Q9UDY2	1051	0.54713	0.821161	57.934	K	PPPVAAKPTFGRSILKPSTPIPPQEGEEVGE	SILK(0.547)PSTPIPPQEGEEVGESSEEQDNAPK(0.453)
Q9UER7	662	0.999996	53.7777	59.228	K	SYVERQRSVHEKNGKKICTLPSPPSPLASLA	K(1)ICTLPSPPSPLASLAPVADSSTR
Q9UEY8	680	0.954363	13.2437	116.27	K	PEKIEEVLSPEGSPSKSPSKKKKKFRTPSFL	SPEKIEEVLSPEGSPSK(0.954)SPSK(0.045)
Q9UF47	45	0.999619	35.9898	143.28	K	ASNEEIKKTYRKLALKHHPDKNPDDPAATEK	KLALK(1)HHPDK
Q9UFC0	246	0.999976	46.289	223.06	K	ALKRPDDVPLSLSPSKRACASPSAQVEGSPV	RPDDVPLSLSPSK(1)R
Q9UGC7	244	0.500026	0	90.731	K	EINLVINPKDLRIDTKRASGAGGQHVNTTDS	IDTK(0.5)R(0.5)ASGAGGQH(0.998)VNTTDSAVR(0.002)
Q9UGP4	328	0.938762	11.8553	62.377	K	RSNSGLGGEVSGVMSKPNVDPQPWFQDGPKS	SNSGLGGEVSGVMSK(0.939)PNVDPQPWFQDGPK(0.061)
Q9UGU5	515	0.999622	38.6445	51.469	K	KKSPPTTMLLPASPAKAPETEPIDVAAHLQL	SPPTTMLLPASPAK(1)APETEPIDVAAH(0.999)LQLLGESLSLIGH(0.001)R
Q9UH99	122	1	74.4445	87.891	K	TGGSESSRASGLVGRKATEDFLGSSSGYSSE	K(1)ATEDFLGSSSGYSSEDDYVGYSDVDQQSSSSR
Q9UH99	36	1	77.2817	95.404	K	SSGGSSVAGSQSTLFKDSPLRTLKRKSSNMK	YSQGDDDGSSSSGGSSVAGSQSTLFK(1)DSPLR
Q9UHB6	223	1	77.9589	127.42	K	QTKILRAQSRSASGRKISENSYSLDDLEIGP	K(1)ISENSYSLDDLEIGPGQLSSSTFDSEKNESR
Q9UHB6	359	1	78.6274	215.79	K	RDSQVKSEVQQPVHPKPLSPDSRASSLSESS	SEVQQPVHPK(1)PLSPDSR
Q9UHB6	747	0.687359	3.42137	87.792	K	WEGEVVKELSVEEQIKRNRYYDEDEDEE___	SQDVELWEGEVVK(0.313)ELSVEEQIK(0.687)R
Q9UHB7	183	1	148.737	165.16	K	QHGSEHSKSRSSSPGKPQAVSSLNSSHSRSH	SSSPGK(1)PQAVSSLNSSHSR
Q9UHB7	485	0.896425	12.1741	105.46	K	NKWQLDNWLNKVNPHKVSPASSVDSNIPSSQ	VNPH(0.054)K(0.896)VSPASSVDSNIPSSQGYK(0.049)
Q9UHB7	503	0.352902	0.780325	88.413	K	PASSVDSNIPSSQGYKKEGREQGTGNSYTDT	VNPH(0.192)K(0.16)VSPASSVDSNIPSSQGYK(0.353)K(0.295)
Q9UHB7	677	0.993727	21.998	112.61	K	SSQTPKYPESNRTPVKPSSVEEEDSFFRQRM	YPESNR(0.006)TPVK(0.994)PSSVEEEDSFFR
Q9UHD1	198	0.499976	0	103.39	K	PIFHEGMKYWSCCRRKTSDFNTFLAQEGCTK	R(0.5)K(0.5)TSDFNTFLAQEGCTK
Q9UHF7	93	0.999998	57.0685	81.48	K	AVLSEKAGFNYESPSKGGNFPSFPHDEVTDR	AGFNYESPSK(1)GGNFPSFPHDEVTDR
Q9UHF7	1040	0.999438	35.0296	93.949	K	TLDIHKRMQPLHIQIKSPQESTGDPGNSSSV	MQPLHIQIK(0.999)SPQESTGDPGNSSSVSEGK
Q9UHF7	126	0.999999	59.5643	93.397	K	LAFSSPAAGGVCEPLKSPQRAEADDPQDMAC	NMLAFSSPAAGGVCEPLK(1)SPQR
Q9UHI6	710	0.813534	6.39777	66.429	K	SLEQPPNGSDTPNPEKYQESPGIQMKTRLKE	ISLEQPPNGSDTPNPEK(0.814)YQESPGIQMK(0.186)
Q9UHI8	771	1	40.544	40.544	K	RNQRGSRNNGSFLAIKAADGTYILNGDYTLS	NNGSFLAIK(1)AADGTYILNGDYTLSTLEQDIMYK(1)
Q9UIF8	680	1	80.4557	102.47	K	GEKTSMKLNKTTSSVKSPSMSLTGHSTPRNL	TTSSVK(1)SPSMSLTGHSTPR
Q9UJM3	259	0.99995	43.0378	126.91	K	RRLRRSHSGPAGSFNKPAIRISNCCIHRASP	SHSGPAGSFNK(1)PAIR
Q9UJX5	772	0.958954	13.6852	68.074	K	SSDEEEEASNKPVKIKEEVLSESEAENQQAG	IK(0.959)EEVLSESEAENQQAGAAALAPEIVIK(0.041)
Q9UJX6	228	1	74.2049	76.417	K	YRLLQSPLCAGCSSDKQQCWCRQALEQFHQL	LLQSPLCAGCSSDK(1)QQCWCR
Q9UK61	1543	0.994889	22.8923	104.07	K	IWEKETKGSRGTDQKKNTQIELQSSPDVQNS	K(0.995)NTQIELQSSPDVQNSLLEDK(0.005)TYLDSEER
Q9UK61	1563	1	72.545	86.079	K	ELQSSPDVQNSLLEDKTYLDSEERTSIDIVC	NTQIELQSSPDVQNSLLEDK(1)TYLDSEER
Q9UKA4	106	0.999955	43.5526	80.683	K	CSLNENEIICMKNINKPLDISSDPLNQSHPS	NINK(1)PLDISSDPLNQSHPSGMLCVMR
Q9UKA4	1578	1	95.8677	234.63	K	VSETTKSADRVTYAEKLSPLTGQACRYCDLK	VTYAEK(1)LSPLTGQACR
Q9UKS6	315	0.999993	51.6366	165.16	K	EEWSLDTQRTISRKEKGGRSPDEVTLTSIVP	EK(1)GGRSPDEVTLTSIVPTR
Q9UKV3	494	0.999933	41.7581	127.32	K	PLSSPSDTKAESPAEKVPEESVLPLVQKSTL	AESPAEK(1)VPEESVLPLVQK
Q9UKV3	672	0.999709	35.3537	84.509	K	SPGVSRDSSTSYTETKDPSSGQEVATPPVPQ	DSSTSYTETK(1)DPSSGQEVATPPVPQLQVCEPK
Q9UKX7	276	0.954979	13.2657	81.943	K	PSSLGATSASFNFGKKVDSSVLGSLSSVPLT	K(0.955)VDSSVLGSLSSVPLTGFSFSPGNSSLFGK(0.045)
Q9ULH7	844	0.999018	30.0921	92.405	K	NAPLPSLQNGPNTPNKPSSPPPPQQFVVQHS	NAPLPSLQNGPNTPNK(0.999)PSSPPPPQQFVVQHSLFGSPVAK(0.001)
Q9ULH7	65	0.974697	17.5685	72.082	K	RTREQLVDQGIMPPLKSPAAFHEQIKSLERA	TREQLVDQGIMPPLK(0.975)SPAAFH(0.008)EQIK(0.017)
Q9ULJ7	1119	0.483229	0.622421	94.807	K	SLNGCSPSPVHTMEQKPLQSLSSKVQSLTIK	YGASSLNGCSPSPVH(0.098)TMEQK(0.483)PLQSLSSK(0.419)
Q9ULL5	1702	0.798389	6.30747	84.214	K	GGSSAPPPKAPAPPPKPETPEKTTSEKPPEQ	NPVSAGGSSAPPPK(0.015)APAPPPK(0.798)PETPEK(0.187)
Q9ULM3	577	0.998597	28.5237	128.57	K	PPLCPIGSHPKVQSPKPITGGLGAFTKVIIK	VQSPK(0.999)PITGGLGAFTK(0.001)
Q9ULW0	63	0.579343	4.04636	82.475	K	KNGTGGLFQGKTPLRKANLQQAIVTPLKPVD	K(0.579)ANLQQAIVTPLK(0.228)PVDNTYYK(0.192)
Q9ULX3	198	0.999392	32.1565	120.99	K	PSEEEEEEENGFEDRKDDSDDDGGGWITPSN	K(0.999)DDSDDDGGGWITPSNIK(0.001)
Q9UM00	237	1	104.939	104.94	K	TKQAGGFLGPPPPSGKFS_____________	QAGGFLGPPPPSGK(1)FS
Q9UMD9	369	0.999925	41.9861	65.855	K	AKKEMELLIMTKDSGKVFTASPASIAATSFS	DSGK(1)VFTASPASIAATSFSEDTLKK
Q9UMS0	110	0.99865	29.9905	62.028	K	FRSPLARQLFRIEGVKSVFFGPDFITVTKEN	IEGVK(0.999)SVFFGPDFITVTK(0.001)ENEELDWNLLK
Q9UMX1	344	0.999999	61.8798	73.11	K	PQRQNGLAHDRAPSRKDSLESDSSTAIIPHE	K(1)DSLESDSSTAIIPHELIR
Q9UNK0	52	1	89.6631	116.71	K	APKLTVTIRALLQNLKEKIALLKDLLLRAVS	LTVTIR(1)ALLQNLK(1)EK(1)
Q9UNS1	1085	1	108.581	150.46	K	RPPASGQETFWRIPAKLSPTQLRRAAASLSQ	IPAK(1)LSPTQLR
Q9UNZ2	112	0.841947	7.28705	154.13	K	GGSERSGQQIVGPPRKKSPNELVDDLFKGAK	K(0.842)K(0.157)SPNELVDDLFK(0.001)
Q9UNZ2	113	0.5	0	108.97	K	GSERSGQQIVGPPRKKSPNELVDDLFKGAKE	K(0.5)K(0.5)SPNELVDDLFK
Q9UPN9	861	1	161.101	281.65	K	NESCKQSGLSSLVNGKSPIRSLMHRSARIGG	QSGLSSLVNGK(1)SPIR
Q9UPQ0	296	0.999987	49.8353	134.02	K	PAPLRKKKAEREEYRKSWSTATSPLGGERPF	K(1)SWSTATSPLGGERPFR
Q9UPQ0	715	0.641267	3.37608	127.79	K	EMSGKVELVLSQKVVKPKSPEPEATLTFPFL	VVK(0.641)PK(0.295)SPEPEATLTFPFLDK(0.064)
Q9UPQ0	717	0.96082	14.2092	131.48	K	SGKVELVLSQKVVKPKSPEPEATLTFPFLDK	VVK(0.036)PK(0.961)SPEPEATLTFPFLDK(0.003)
Q9UPT5	256	1	71.7164	97.417	K	SSSSSGVPYSPAIPNKRKDTPTKKPVKRPGT	SSSSSGVPYSPAIPNK(1)R
Q9UPT8	900	0.885863	10.9784	91.712	K	SGPSDPRLARALPTSKPEGSLHSSPVGPSSS	ALPTSK(0.886)PEGSLH(0.043)SSPVGPSSSK(0.071)
Q9UPU5	1140	0.938094	11.8051	126.34	K	GRKKTLLSESSSQSSKSPSLSSKQQHQPSAS	TLLSESSSQSSK(0.938)SPSLSSK(0.062)
Q9UQ35	1186	0.99709	25.3489	159.44	K	PPQEDATASPPRQKDKFSPFPVQDRPESSLV	DK(0.997)FSPFPVQDRPESSLVFK(0.003)
Q9UQ35	1244	0.969375	15.0203	64.405	K	LPTSSQDEELMEVVEKSEEPAGQILSHLSSE	EQNSALPTSSQDEELMEVVEK(0.969)SEEPAGQILSHLSSELK(0.031)
Q9UQ35	1022	0.994635	22.6813	99.011	K	PSLSGSKSPCPQEKSKDSLVQSCPGSLSLCA	SK(0.995)DSLVQSCPGSLSLCAGVK(0.005)
Q9UQ35	1000	0.999998	57.362	107.75	K	PRQSHSGSISPYPKVKAQTPPGPSLSGSKSP	VK(1)AQTPPGPSLSGSK(0.048)SPCPQEK(0.952)
Q9UQ35	980	0.988094	19.0345	113.37	K	PRYSHSGSSSPDTKVKPETPPRQSHSGSISP	VK(0.988)PETPPR(0.054)QSH(0.955)SGSISPYPK(0.002)
Q9UQE7	1059	0.999945	42.6013	64.112	K	FQKLVPGGKATLVMKKGDVEGSQSQDEGEGS	K(1)GDVEGSQSQDEGEGSGESER(1)GSGSQSSVPSVDQFTGVGIR
Q9UQK1	262	0.999733	34.9049	41.763	K	DNNDGQNYRIVHVQWKPDGVQTQMAPQDCAF	IVH(1)VQWK(1)PDGVQTQMAPQDCAFH(0.825)QTSPK(0.175)
Q9UQR1	253	0.5	0	104.78	K	QKYHMERHKRTHSGEKPYQCEYCLQYFSRTD	TH(0.5)SGEK(0.5)PYQCEYCLQYFSR
Q9Y232	84	0.753944	4.8688	69.095	K	KRKNKKGKTEYLVRWKGYDSEDDTWEPEQHL	WK(0.754)GYDSEDDTWEPEQH(0.246)LVNCEEYIHDFNRR
Q9Y294	159	0.999931	41.8182	88.027	K	PRVTRFHINWEDNTEKLEDAESSNPNLQSLL	FHINWEDNTEK(1)LEDAESSNPNLQSLLSTDALPSASK
Q9Y2D5	619	0.95266	13.0997	95.404	K	EATVEEAEAAAFGSEKPQSMFEPPQVSSPVQ	DGAEQQGPEATVEEAEAAAFGSEK(0.953)PQSMFEPPQVSSPVQEK(0.047)R(0.001)
Q9Y2D5	774	0.999883	39.307	76.967	K	SRTCYKTAPGKIEKVKPPPSPTTEGPSLQPD	VK(1)PPPSPTTEGPSLQPDLAPEEAAGTQRPK
Q9Y2H2	939	0.999345	31.8979	79.383	K	AHGSGLGKGQESPLKKSPSAGDVHILTGFAK	K(0.999)SPSAGDVHILTGFAK(0.001)
Q9Y2K7	539	0.999996	54.5001	73.632	K	FPTRPKVRVPTIPITKPHTMKPAPRLTPVRP	VRVPTIPITK(1)PH(1)TMK(1)
Q9Y2W1	221	0.999984	47.8694	92.295	K	FSGGTSQDTKASESSKPWPDATYGTGSASRA	ASESSK(1)PWPDATYGTGSASR
Q9Y2W1	252	1	160.669	215.93	K	SAVSELSPRERSPALKSPLQSVVVRRRSPRP	ER(1)SPALK(1)SPLQSVVVR
Q9Y2W1	314	0.471107	0.34371	111.99	K	QGQFDHGSGSLSPSKKSPVGKSPPSTGSTYG	K(0.471)SPVGK(0.435)SPPSTGSTYGSSQK(0.094)
Q9Y2W1	319	0.999961	44.7436	177.67	K	HGSGSLSPSKKSPVGKSPPSTGSTYGSSQKE	SPVGK(1)SPPSTGSTYGSSQKEESAASGGAAYTK
Q9Y2W1	470	0.993875	22.1769	131.32	K	KVIGANKNQEEEKSGKWEGLVYAPPGKEKQR	NQEEEK(0.006)SGK(0.994)WEGLVYAPPGK
Q9Y2X7	430	0.543448	0.756683	89.297	K	DLSDGAVTLQEYLELKKALATSEAKVQQLMK	SMDSSDLSDGAVTLQEYLELK(0.543)K(0.457)
Q9Y2X9	259	0.996661	24.7952	89.297	K	SLVGDGEGAILSPSQKPHICDHCSAAFRSSY	PSLVGDGEGAILSPSQK(0.997)PH(0.003)ICDHCSAAFR
Q9Y3A4	93	0.933843	11.4973	63.158	K	LLSTCGLVQSVELQEKPDLAESPKESRSKFF	LLSTCGLVQSVELQEK(0.934)PDLAESPK(0.066)ESR
Q9Y3S2	289	1	112.878	128.82	K	EYEAEDDEEEEDEGRKDSDTESSDLFTNLNL	K(1)DSDTESSDLFTNLNLGR
Q9Y3Z3	580	0.5702	3.60829	113.95	K	ARQYFVQWCADRNFTKPQDGDVIAPLITPQK	NFTK(0.57)PQDGDVIAPLITPQK(0.248)K(0.181)
Q9Y3Z3	595	0.597135	1.70924	182.49	K	KPQDGDVIAPLITPQKKEWNDSTSVQNPTRL	NFTKPQDGDVIAPLITPQK(0.597)K(0.403)
Q9Y450	62	0.972406	15.4999	93.125	K	KPSVEPVEEYDYEDLKESSNSVSNHQLSGFD	DK(0.027)PSVEPVEEYDYEDLK(0.972)ESSNSVSNHQLSGFDQAR
Q9Y478	195	0.966227	14.5652	86.261	K	SSSPPGPYHQEPYVCKPEERFRAPPILPPHL	CSDVSELSSSPPGPYH(0.034)QEPYVCK(0.966)PEER
Q9Y490	592	1	70.4379	70.438	K	VTTISSNLTEMSRGVKLLAALLEDEGGSGRP	GVK(1)LLAALLEDEGGSGR(1)PLLQAAK(1)
Q9Y4B5	1218	0.999427	35.896	69.485	K	AESKGALKKEREVHQKLLADSHSLVMDLRWQ	ER(0.01)EVH(0.99)QK(0.999)LLADSH(0.823)SLVMDLR(0.178)
Q9Y4E8	228	1	91.6222	91.622	K	QKNEDGTWPRGPSTPKSPGASNFSTLPKISP	GPSTPK(1)SPGASNFSTLPK(1)
Q9Y4F3	1092	1	135.815	155.47	K	NKPPPPNTDPWLLRSKSPVGNPQLIQFSREV	SK(1)SPVGNPQLIQFSR
Q9Y4F5	871	0.989238	20.0242	76.001	K	PDGPAPAFLRQESFTKEPASGPPAPGKPPHI	QESFTK(0.989)EPASGPPAPGK(0.01)PPH(0.001)ISSHPLLQDLAATR
Q9Y4H2	305	0.999998	56.8068	109.81	K	AMKALKELFEFRPRSKSQSSGSSATHPISVP	SK(1)SQSSGSSATHPISVPGAR
Q9Y4K4	232	0.999969	45.1406	69.846	K	PMFDLHPMRALFLMSKSNFQPPKLKDKTKWS	ALFLMSK(1)SNFQPPK
Q9Y520	2670	1	157.371	189.09	K	MSEMELKAFGSGIDIKPGTPPIAGRSTTPTS	AFGSGIDIK(1)PGTPPIAGR
Q9Y520	2008	0.995464	23.6838	77.077	K	DNKVAPPAVLNDISKKLGPISPPQPPSVSAW	K(0.995)LGPISPPQPPSVSAWNK(0.004)PLTSFGSAPSSEGAK
Q9Y520	2113	0.458921	0	96.55	K	AQKLPDLSPVENKEHKPGPIGKERSLKNRKV	LPDLSPVENK(0.459)EH(0.003)K(0.459)PGPIGK(0.079)
Q9Y570	64	0.999999	58.5746	60.48	K	YFESMEDVEVENETGKDTFRVYKSGSEGPVL	DFSPVPWSQYFESMEDVEVENETGK(1)DTFR
Q9Y592	225	1	96.1713	96.171	K	VEQLAREKVYLCQKLKGLEAEVAELKAEKEN	LK(1)GLEAEVAELK(1)AEK(1)
Q9Y592	235	1	96.1713	96.171	K	LCQKLKGLEAEVAELKAEKENSEAQVENAQR	LK(1)GLEAEVAELK(1)AEK(1)
Q9Y5H4	113	0.761866	5.05056	56.139	K	QSMPCLVSFNILVEDKMKLFPVEVEIIDIND	EELCAQSMPCLVSFNILVEDK(0.762)MK(0.238)
Q9Y5K6	544	0.996679	24.7735	87.363	K	NLKPSELKKDTCYSPKPSVYLSTPSSASKAN	DTCYSPK(0.997)PSVYLSTPSSASK(0.003)
Q9Y5P4	152	0.5	0	72.086	K	VSGASGYSATSTSSFKKGHSLREKLAEMETF	HGSMVSLVSGASGYSATSTSSFK(0.5)K(0.5)
Q9Y605	105	0.59183	1.61345	80.102	K	EGRAAKRCEKAEEKAKEIAKMAEMLVELVRR	AK(0.592)EIAK(0.408)MAEMLVELVR(1)
Q9Y618	2412	0.999949	43.0243	76.909	K	GGKAKVSGRPSSRKAKSPAPGLASGDRPPSV	AK(1)SPAPGLASGDRPPSVSSVHSEGDCNR
Q9Y618	1594	0.817268	6.5414	94.359	K	ASQDRKLTSTPREIAKSPHSTVPEHHPHPIS	EIAK(0.817)SPH(0.181)STVPEH(0.001)H(0.001)PHPISPYEHLLR
Q9Y618	1535	0.792085	5.8139	83.755	K	GSIARGAPVIVPELGKPRQSPLTYEDHGAPF	GAPVIVPELGK(0.792)PR(0.208)QSPLTYEDHGAPFAGHLPR
Q9Y618	1787	0.999889	39.554	208.92	K	HSSSPLSPGGPTHLTKPTTTSSSERERDRDR	HSSSPLSPGGPTHLTK(1)PTTTSSSER
Q9Y618	2257	0.963211	14.18	135.08	K	LYRDGEQTEPSRMGSKSPGNTSQPPAFFSKL	MGSK(0.963)SPGNTSQPPAFFSK(0.037)
Q9Y618	1974	0.999503	33.0392	88.708	K	KPPARSGLEPASSPSKGSEPRPLVPPVSGHA	SGLEPASSPSK(1)GSEPRPLVPPVSGHATIAR
Q9Y6D5	215	0.919155	10.5574	129.74	K	QVLQEARELEKPIQSKPQSPVIQAAAVSPKF	ELEK(0.081)PIQSK(0.919)PQSPVIQAAAVSPK(1)
Q9Y6D6	1560	0.56901	1.20845	62.145	K	NSGETAPPPPSPVSEKPLDTISQKSVDIHDS	TTIPHALLTWRPNSGETAPPPPSPVSEK(0.569)PLDTISQK(0.431)
Q9Y6E2	400	1	82.8772	82.877	K	AHVAKGKSVFLDQMKKFVEWLQNAEEESESE	K(1)FVEWLQNAEEESESEGEEN
Q9Y6J9	484	1	119.287	165.7	K	PGDKKEPAAAPDSVRKMPQLTASAIVSPHGD	K(1)MPQLTASAIVSPHGDESPR
Q9Y6K5	364	0.636375	2.43106	64.538	K	GCSGLGHPIQLDPNQKTPENSKSLNAVYPRA	AGCSGLGHPIQLDPNQK(0.636)TPENSK(0.364)
Q9Y6N7	937	1	134.669	141.73	K	RKKRNGLTSTYAGIRKVPSFTFTPTVTYQRG	K(1)VPSFTFTPTVTYQR
Q9Y6R9	444	0.836412	7.08668	123.67	K	DFSESLSRGGHRRRGKPPSPTPWSGSNMKSP	GK(0.836)PPSPTPWSGSNMK(0.164)
Q9Y6X9	722	0.999921	41.0213	147.62	K	REVPSPKVIKTPVVKKTESPIKLSPATPSRK	K(1)TESPIKLSPATPSR
Q9Y6Y0	349	1	63.9445	82.265	K	SKSLSFEMQQDELIEKPMSPMQYARSGLGTA	SLSFEMQQDELIEK(1)PMSPMQYAR
A0A0J9YWL9	596	0.991995	23.6997	71.976	H	LEDSNSHSLKKDPMMHQEMVPLGDSNSHSLK	K(0.006)DPMMH(0.992)QEMVPLGDSNSH(0.983)SLK(0.966)K(0.053)
A0A0J9YWL9	608	0.983398	17.7005	71.976	H	PMMHQEMVPLGDSNSHSLKKDPVVPQDTAPL	K(0.006)DPMMH(0.992)QEMVPLGDSNSH(0.983)SLK(0.966)K(0.053)
A0A1B0GUJ8	37	1	53.0333	53.033	H	SYKSLMILGIPEDCNHEEFEEIIRLPLKPLG	SLMILGIPEDCNH(1)EEFEEIIR(1)LPLK(1)
A0FGR8	689	0.997531	28.7432	84.515	H	RPSVSKEGRKTSIKSHMSGSPGPGGSNTAPS	SH(0.998)MSGSPGPGGSNTAPSTPVIGGSDK(0.001)PGMEEK(0.001)
A0JLT2	225	0.900319	12.2101	75.057	H	DRKRKKKEKKKKKNRHSPDHPGMGSSQASSS	NR(0.054)H(0.9)SPDH(0.046)PGMGSSQASSSSSLR
A0JLT2	229	0.999806	37.2459	166.21	H	KKKEKKKKKNRHSPDHPGMGSSQASSSSSLR	NRHSPDH(1)PGMGSSQASSSSSLR
A0JNW5	421	0.645222	2.71537	107.49	H	AVKDHNVGSPPKSPTHASPQHTQTEKDYPLK	DHNVGSPPK(0.345)SPTH(0.645)ASPQH(0.008)TQTEK(0.001)DYPLK(0.001)
A1L390	999	0.996955	27.3153	113.75	H	PVLSLFDYEQLMAQEHSPPKPSSAGEMSPQR	K(0.001)PVLSLFDYEQLMAQEH(0.997)SPPK(0.002)PSSAGEMSPQR
A1X283	294	0.782132	5.55243	76.818	H	SGEPLPPKPGPGSPSHPGALDLDGVSRQQNA	NSGEPLPPK(0.218)PGPGSPSH(0.782)PGALDLDGVSR
A2RUC4	22	0.805829	6.23705	47.728	H	PVPRLEGVSREQFMQHLYPQRKPLVLEGIDL	MAGQH(0.229)LPVPR(0.776)LEGVSR(0.995)EQFMQH(0.806)LYPQR(0.194)
A4D1E1	1168	1	62.8609	62.861	H	DEIDKYKILQLQAQQHMQKQLLSKHLRVLPA	ILQLQAQQH(1)MQK(1)QLLSK(1)
A4D1F6	808	0.980301	17.0975	101.3	H	TDMPTKSTVSLSERAHQALVIWKTQSNKLSL	STVSLSER(0.019)AH(0.98)QALVIWK(0.001)
A4FU69	398	0.997268	25.8976	76.357	H	DMRRQMFAELFLHCDHGKVGFLDRQRTLALL	R(1)QMFAELFLH(0.001)CDH(0.997)GK(0.998)VGFLDR(0.004)
A5PLN9	10	0.922129	10.7372	76.927	H	______MEVNPPKQEHLLALKVMRLTKPTLF	MEVNPPKQEH(0.922)LLALK(0.078)
A5YKK6	1270	0.991971	22.0248	41.661	H	PNPWTMAIMNVLAELHQEHDLKLNLKFEIEV	VLESSIR(0.003)SVVFR(0.009)PPNPWTMAIMNVLAELH(0.992)QEH(0.998)DLK(0.999)
A5YKK6	1273	0.997732	28.1204	41.661	H	WTMAIMNVLAELHQEHDLKLNLKFEIEVLCK	VLESSIR(0.003)SVVFR(0.009)PPNPWTMAIMNVLAELH(0.992)QEH(0.998)DLK(0.999)
P0C7N4	40	0.999829	38.2736	52.91	H	IVTPASRRLGPRGGRHLGSVSTAMAATQELL	GGR(1)H(1)LGSVSTAMAATQELLLQLQKDNR
A6NKD9	219	0.302267	0	52.96	H	DGSSTSSAGSGGSPDHHHHVPPPLLPPGPHK	DVGDGSSTSSAGSGGSPDH(0.302)H(0.302)H(0.092)H(0.302)VPPPLLPPGPHK(0.001)
A6NKD9	220	0.302267	0	52.96	H	GSSTSSAGSGGSPDHHHHVPPPLLPPGPHKA	DVGDGSSTSSAGSGGSPDH(0.302)H(0.302)H(0.092)H(0.302)VPPPLLPPGPHK(0.001)
A6NKD9	221	0.248912	0	51.306	H	SSTSSAGSGGSPDHHHHVPPPLLPPGPHKAP	DVGDGSSTSSAGSGGSPDH(0.249)H(0.249)H(0.249)H(0.249)VPPPLLPPGPHK(0.004)
A6NKD9	222	0.302267	0	52.96	H	STSSAGSGGSPDHHHHVPPPLLPPGPHKAPD	DVGDGSSTSSAGSGGSPDH(0.302)H(0.302)H(0.092)H(0.302)VPPPLLPPGPHK(0.001)
A6NKT7	1269	0.95889	13.6832	64.749	H	LREDALDDSVSSSSVHASPLASSPVRKNLFH	EDALDDSVSSSSVH(0.959)ASPLASSPVRK(0.041)
A6NMS3	155	0.999946	42.9559	64.522	H	LCIRMTTGAFKAGNLHSMIHVGLLLRLTFCR	AGNLH(1)SMIH(1)VGLLLRLTFCRSNK
A6NMS3	159	0.999641	34.5087	64.522	H	MTTGAFKAGNLHSMIHVGLLLRLTFCRSNKI	AGNLH(1)SMIH(1)VGLLLRLTFCRSNK
A7E2V4	1747	0.827315	7.09034	42.106	H	LQEIVMETLQRLSPAHAHNHLRAPAFHQLVQ	GVLSPFVLQEIVMETLQR(0.042)LSPAH(0.827)AH(0.492)NH(0.492)LR(0.146)
A7E2V4	1749	0.492254	0	42.106	H	EIVMETLQRLSPAHAHNHLRAPAFHQLVQRC	GVLSPFVLQEIVMETLQR(0.042)LSPAH(0.827)AH(0.492)NH(0.492)LR(0.146)
A7E2V4	1751	0.492254	0	42.106	H	VMETLQRLSPAHAHNHLRAPAFHQLVQRCQQ	GVLSPFVLQEIVMETLQR(0.042)LSPAH(0.827)AH(0.492)NH(0.492)LR(0.146)
A7E2V4	1091	0.929748	11.2171	73.322	H	PTEGFTEKNVPESSPHSPCEGLPSEAALTPR	NVPESSPH(0.93)SPCEGLPSEAALTPRPEGK(0.07)
A7XYQ1	665	0.982793	18.5231	60.49	H	QDGVIDLTVGHRARLHNVIHRALHAHVKAER	LH(0.983)NVIH(0.983)R(0.987)ALH(0.695)AH(0.163)VK(0.185)AER(0.005)
A7XYQ1	669	0.982755	18.5231	60.49	H	IDLTVGHRARLHNVIHRALHAHVKAEREPSA	LH(0.983)NVIH(0.983)R(0.987)ALH(0.695)AH(0.163)VK(0.185)AER(0.005)
A7XYQ1	673	0.694867	6.9209	60.49	H	VGHRARLHNVIHRALHAHVKAEREPSAAERR	LH(0.983)NVIH(0.983)R(0.987)ALH(0.695)AH(0.163)VK(0.185)AER(0.005)
Q0WX57	467	1	72.6522	72.652	H	VRKVEGTLPPDVLVIHQSKYKCGMKNHHPEQ	VEGTLPPDVLVIH(1)QSK(1)
A8MY62	307	0.988233	18.3769	53.262	H	PGAYFANETGTPWEFHAQRGYRVVRKDGDLD	TLLAPLLACPGAYFANETGTPWEFH(0.988)AQR(0.821)GYR(0.19)
M0R2J8	432	0.995268	23.2195	66.201	H	EKITEKVILSMTAKEHHKEQEEVSRLIDELQ	EH(0.995)H(0.995)K(0.999)EQEEVSR(0.011)LIDELQTAIK
M0R2J8	433	0.995268	23.2195	66.201	H	KITEKVILSMTAKEHHKEQEEVSRLIDELQT	EH(0.995)H(0.995)K(0.999)EQEEVSR(0.011)LIDELQTAIK
O00139	611	0.999946	44.3309	60.876	H	CEQNEEEVSPQLFTFHEAVSQMVEMEEQVVE	LLCEQNEEEVSPQLFTFH(1)EAVSQMVEMEEQVVEDHR
O00180	296	0.968107	18.4375	54.681	H	YVKKDKDEDQVHIIEHDQLSFSSITDQAAGM	DK(0.039)DEDQVH(0.06)IIEH(0.968)DQLSFSSITDQAAGMK(0.245)EDQK(0.688)
O00192	7	0.99183	19.8698	43.116	H	_________MEDCNVHSAASILASVKEQEAR	MEDCNVH(0.992)SAASILASVK(0.801)EQEAR(0.207)
O00429	621	0.476942	0	55.417	H	KSKPIPIMPASPQKGHAVNLLDVPVPVARKL	SK(0.046)PIPIMPASPQK(0.477)GH(0.477)AVNLLDVPVPVAR
O00592	508	0.879958	8.81197	57.902	H	QQRLTEELQTVENGYHDNPTLEVMETSSEMQ	LTEELQTVENGYH(0.88)DNPTLEVMETSSEMQEK(0.12)
O00712	14	0.997775	27.5893	40.937	H	__MMYSPICLTQDEFHPFIEALLPHVRAIAY	MMYSPICLTQDEFH(0.998)PFIEALLPH(0.002)VR
O14497	359	0.983251	17.6867	126.83	H	AAAAAASGGAQQRSHHAPMSPGSSGGGGQPL	SH(0.017)H(0.983)APMSPGSSGGGGQPLAR
O14578	700	0.999097	32.9499	53.6	H	GIRKKLVEAEELEEKHREAQVSAQHLEVHLK	H(0.999)R(0.999)EAQVSAQH(0.008)LEVH(0.956)LK(0.829)QK(0.209)
O14578	713	0.956063	13.1248	53.6	H	EKHREAQVSAQHLEVHLKQKEQHYEEKIKVL	H(0.999)R(0.999)EAQVSAQH(0.008)LEVH(0.956)LK(0.829)QK(0.209)
O14641	144	0.706718	3.96802	81.566	H	GDSRPPSFHPNVSSSHENLEPETETESVVSL	TSGIGDSR(0.01)PPSFH(0.283)PNVSSSH(0.707)ENLEPETETESVVSLR
O14646	1697	0.635476	4.84647	70.334	H	RSPYGSRSPFEHSVEHKSTPEHTWSSRKT__	SPYGSR(0.773)SPFEH(0.358)SVEH(0.635)K(0.225)STPEH(0.008)TWSSR
O14662	31	0.999926	41.9667	69.805	H	NSIQNRQLLAEQVSSHITSSPLHSRSIAAEL	QLLAEQVSSH(1)ITSSPLHSR
O14662	196	0.999938	43.1155	67.76	H	SGYLKRMKNREERSQHFFDTSVPLMDDGDDN	SQH(1)FFDTSVPLMDDGDDNTLYHR
O14686	3613	0.592326	1.63263	55.049	H	KQQQQQQQQQQQQQQHSAVLALSPSQSPRLL	NK(0.407)QQQQQQQQQQQQQQH(0.592)SAVLALSPSQSPR(0.001)
O14770	200	0.5	0	77.062	H	IDLVIDERDGSSKSDHEELSGSSTNLADHNP	DGSSK(0.5)SDH(0.5)EELSGSSTNLADHNPSSWR
O15015	1499	0.662325	5.93631	81.197	H	TRSEEPEDSVHRSPCHAGDCQLNGPTLSHMD	SEEPEDSVH(0.169)R(0.169)SPCH(0.662)AGDCQLNGPTLSHMDSWDNR
O15020	1029	0.75067	4.79277	56.882	H	RVGELTREANALAAGHPAQAVAINARLREVQ	VGELTREANALAAGH(0.751)PAQAVAINAR(0.249)
O15027	311	1	69.6084	134.77	H	SDPESTFRQNPRIVNHWASPELRQNPGVKNE	IVNH(1)WASPELR
O15027	1373	0.999875	39.0354	89.231	H	HSAHSLASRRSSLSSHSHQSQIYRSHNVAAG	SSLSSH(1)SHQSQIYR
O15027	1400	0.999736	36.2422	100.79	H	VAAGSYEAPLPPGSFHGDFAYGTYRSNFSSG	SHNVAAGSYEAPLPPGSFH(1)GDFAYGTYR
O15037	348	0.999989	53.2126	68.895	H	HRAAQSRGASLLQRLHNGNASPPRVPSPPPA	LH(1)NGNASPPR(1)VPSPPPAPEPPWHCGDR
O15042	69	0.999673	34.8482	160.93	H	NYRNESARESLCDSPHQNLSRPLLENKLKAF	ESLCDSPH(1)QNLSRPLLENK
O15047	536	0.999613	31.2803	68.453	H	LGARDTGSEVPSGSGHGPCTPPPAPANFEDV	DTGSEVPSGSGH(1)GPCTPPPAPANFEDVAPTGSGEPGATR(0.48)ESPK(0.52)
O15075	35	0.999911	40.5438	77.726	H	RYSRGSRVNGLPSPTHSAHCSFYRTRTLQTL	VNGLPSPTH(1)SAHCSFYR
O15156	470	0.846764	6.7261	46.785	H	LEVRTRRRRKDDAPPHYPPPSTAAASPAGLD	R(0.007)K(0.295)DDAPPH(0.847)YPPPSTAAASPAGLDLSNGH(0.841)LDTFR(0.01)
O15156	490	0.841267	6.80503	46.902	H	STAAASPAGLDLSNGHLDTFRLSLARFWEQS	R(0.007)K(0.295)DDAPPH(0.847)YPPPSTAAASPAGLDLSNGH(0.841)LDTFR(0.01)
O15265	716	0.70968	3.89088	57.299	H	GGSGKKRKNSSPLLVHSSSSSSSSSSSSHSM	K(0.29)NSSPLLVH(0.71)SSSSSSSSSSSSH(0.001)SMESFR
O15304	56	0.433869	1.42023	45.227	H	KTKRLLFLGAQAYLDHVWDEGCAVVHLPESP	LLFLGAQAYLDH(0.434)VWDEGCAVVH(0.252)LPESPK(0.313)PGPTGAPR(0.001)
O15357	994	0.962092	14.0448	65.811	H	NSFNNPAYYVLEGVPHQLLPPEPPSPARAPV	NSFNNPAYYVLEGVPH(0.962)QLLPPEPPSPAR(0.038)
O15409	313	0.730575	4.33228	75.319	H	STTSSNTSKASPPITHHSIVNGQSSVLSARR	ASPPITH(0.731)H(0.269)SIVNGQSSVLSAR
O15409	340	0.875363	10.1161	57.496	H	SARRDSSSHEETGASHTLYGHGVCKWPGCES	R(0.015)DSSSH(0.024)EETGASH(0.875)TLYGHGVCK(0.085)
O15417	1030	0.998434	28.0398	46.31	H	VSKPPAYAYPATPSSHPTSPPPASPPPTPGI	LEDVSK(0.999)PPAYAYPATPSSH(0.998)PTSPPPASPPPTPGITR(0.003)
O43159	55	0.998456	28.1063	62.082	H	LLATLRALEAASLSQHPPSLCISDSEEEEEE	ALEAASLSQH(0.998)PPSLCISDSEEEEEER(0.002)
O43166	1704	0.71747	3.74273	74.063	H	YEVQRASFFAASDENHRPLSAASNSDQLEDQ	ASFFAASDENH(0.717)R(0.717)PLSAASNSDQLEDQALAQMK(0.368)PYSSSK(0.198)
O43166	1561	1	71.2512	106.26	H	DLESPTPESQKSFKFHALSSPQSPFPSTPTS	FH(1)ALSSPQSPFPSTPTSR
O43166	1449	0.932636	10.7828	80.816	H	PVVFTSARSSPKEELHPAAPSQLAPSFSSSS	H(0.195)SASPVVFTSAR(0.94)SSPK(0.933)EELH(0.933)PAAPSQLAPSFSSSSSSSSGPR
O43166	1268	0.197931	0	53.288	H	RESPSGRLMRQDPVVHLSPNKQGHSDSHYSS	QDPVVH(0.198)LSPNK(0.198)QGH(0.198)SDSH(0.198)YSSH(0.198)SSSNTLSSNASSAHSDEK(0.01)
O43166	1276	0.313677	0	53.288	H	MRQDPVVHLSPNKQGHSDSHYSSHSSSNTLS	QDPVVH(0.061)LSPNK(0.153)QGH(0.314)SDSH(0.314)YSSH(0.153)SSSNTLSSNASSAHSDEK(0.006)
O43166	1280	0.313677	0	53.288	H	PVVHLSPNKQGHSDSHYSSHSSSNTLSSNAS	QDPVVH(0.061)LSPNK(0.153)QGH(0.314)SDSH(0.314)YSSH(0.153)SSSNTLSSNASSAHSDEK(0.006)
O43166	1284	0.197931	0	53.288	H	LSPNKQGHSDSHYSSHSSSNTLSSNASSAHS	QDPVVH(0.198)LSPNK(0.198)QGH(0.198)SDSH(0.198)YSSH(0.198)SSSNTLSSNASSAHSDEK(0.01)
O43294	40	0.984384	18.8649	70.003	H	KERPAEPLTPPPSYGHQPQTGSGESSGASGD	ER(0.013)PAEPLTPPPSYGH(0.984)QPQTGSGESSGASGDK(0.002)DHLYSTVCK
O43314	1059	0.999907	40.3368	49.525	H	PRTLVEQKQNPTVGSHCAGLFSTSVLGGSSS	QNPTVGSH(1)CAGLFSTSVLGGSSSAPNLQDYAR
O43353	352	0.956532	13.4262	70.57	H	VNHGPQEESCGSSQLHENSGSPETSRSLPAP	MELSLNIPVNH(0.043)GPQEESCGSSQLH(0.957)ENSGSPETSR
O43379	1354	0.978634	17.6643	63.297	H	FRPSLPAPESPGLPAHPSNPQLPEARPGIPG	LH(0.004)GSAFR(0.017)PSLPAPESPGLPAH(0.979)PSNPQLPEAR
O43474	259	1	84.3814	88.637	H	SPSVISVSKGSPDGSHPVVVAPYNGGPPRTC	GSPDGSH(1)PVVVAPYNGGPPR
O43747	575	0.499995	0	88.819	H	QQRAVEYNALFKKYDHMRSALLERMPVMEKV	KYDH(0.5)MR(0.5)SALLER
O43825	76	0.99933	31.7396	96.113	H	TYTFRGFRSTKSETNHSSLRNIWKETVPQTL	GFRSTKSETNH(0.999)SSLR(0.001)
O43896	987	0.499878	0	50.166	H	PHDCKLRFPFKSNPQHRESWPGMGSGEAPTP	SNPQH(0.5)R(0.5)ESWPGMGSGEAPTPLQPPEEVTPHPATPAR
O60244	1135	0.998188	27.7463	107.09	H	PAARMPGMSPANPSLHSPVPDASHSPRAGTS	MPGMSPANPSLH(0.998)SPVPDASH(0.002)SPR
O60245	1043	0.998477	28.162	74.622	H	NTFVGAGDNISIGSDHCSEYSCQTNNKYSKQ	H(0.003)QAVQDLPPANTFVGAGDNISIGSDH(0.998)CSEYSCQTNNK(0.999)
O60245	1008	0.999969	42.4779	80.362	H	ARHYKSSSPLPTVQLHPQSPTAGKKHQAVQD	SSSPLPTVQLH(1)PQSPTAGK(0.556)K(0.444)
O60256	211	0.926256	12.205	58.5	H	AQSFAERLRLGIAVIHGEAQDAESDLVDGRH	LGIAVIH(0.926)GEAQDAESDLVDGR(0.056)H(0.018)SPPMVR
O60256	226	0.565077	1.18299	78.236	H	HGEAQDAESDLVDGRHSPPMVRSVAAIHPSL	LGIAVIHGEAQDAESDLVDGR(0.43)H(0.565)SPPMVR(0.004)
O60266	584	1	73.0368	126.48	H	LQDLADRVVDASEDEHELNQLLNEALLERES	VVDASEDEH(1)ELNQLLNEALLER
O60271	180	1	82.4912	99.371	H	EMIHNYMEHLERTKLHQLSGSDQLESTAHSR	LH(1)QLSGSDQLESTAHSR
O60292	1684	0.989814	23.8181	52.402	H	FSLNDPALSPDIPPAHSPVHSHLSLERGPPT	AVSLFSLNDPALSPDIPPAH(0.99)SPVH(0.003)SH(0.004)LSLER(0.003)
O60503	13	0.840486	10.9828	54.465	H	___MASPPHQQLLHHHSTEVSCDSSGDSNSV	ASPPH(0.024)QQLLH(0.067)H(0.067)H(0.84)STEVSCDSSGDSNSVR(0.002)
O60504	598	0.991915	20.985	64.589	H	LGTPGPALSHSRGPSHPLDLGTSSPNTSQIH	GPSH(0.992)PLDLGTSSPNTSQIH(0.008)WTPYR
O60522	846	0.981388	17.9591	43.38	H	RQWSRALISGIQSVEHVNVTFVDYGDREMVS	QWSR(0.003)ALISGIQSVEH(0.981)VNVTFVDYGDR(0.016)
O60543	114	0.999229	31.1514	63.662	H	FMILEKGQKWMPGSQHVPTCSPPKRSGIARV	WMPGSQH(0.999)VPTCSPPK(0.096)R(0.338)SGIAR(0.567)
O60610	344	1	65.8417	65.842	H	DFRVHIRSELMRLGLHQVLQDLREIENEDMR	LGLH(1)QVLQDLR(1)EIENEDMR(1)
O60706	1069	0.999836	37.8517	65.5	H	SLTVEWMGLTAAKNLHHNLLNKIILGPIRFF	NLH(1)H(1)NLLNK(0.999)IILGPIR(0.001)
O60706	1070	0.999836	37.8517	65.5	H	LTVEWMGLTAAKNLHHNLLNKIILGPIRFFD	NLH(1)H(1)NLLNK(0.999)IILGPIR(0.001)
O60885	1069	0.981295	17.0551	53.39	H	YSTGHLREAPSPLMIHSPQMSQFQSLTHQSP	EAPSPLMIH(0.981)SPQMSQFQSLTH(0.968)QSPPQQNVQPK(0.051)
O60885	1081	0.96814	14.7421	60.687	H	LMIHSPQMSQFQSLTHQSPPQQNVQPKKQEL	EAPSPLMIH(0.981)SPQMSQFQSLTH(0.968)QSPPQQNVQPK(0.051)
O75044	934	0.470499	0	77.488	H	IRKTATAGRSKSFNNHRPMDPEVIAQDIEAT	SK(0.059)SFNNH(0.47)R(0.47)PMDPEVIAQDIEATMNSALNELR
O75116	1127	1	68.9674	97.312	H	KDSDIEQLRSQLQALHIGLDSSSIGSGPGDA	SQLQALH(1)IGLDSSSIGSGPGDAEADDGFPESR
O75121	105	0.5	0	68.173	H	EEEDEKERGGGKWQMHDSGLLNITKVSFSDR	GGGK(0.5)WQMH(0.5)DSGLLNITK
O75122	726	0.500156	0	62.055	H	VFSMFLETLVDFIQVHKDDLQDWLFVLLTQL	R(1)VFSMFLETLVDFIQVH(0.5)K(0.5)
O75179	2037	1	149.724	220.4	H	TAPTNATYPMPTAKEHYPVSSPSSPSPPAQP	EH(1)YPVSSPSSPSPPAQPGGVSR
O75182	3	0.993013	21.5663	53.342	H	_____________MAHAGGGSGGSGAGGPAG	MAH(0.993)AGGGSGGSGAGGPAGR(0.007)GLSGAR
O75290	239	0.788547	6.72625	61.821	H	NECGKAFSLLTLLNRHKNIHTGEKLFECKEC	AFSLLTLLNR(0.056)H(0.789)K(0.208)NIH(0.909)TGEK(0.039)
O75290	243	0.908796	11.6322	61.821	H	KAFSLLTLLNRHKNIHTGEKLFECKECGKSF	AFSLLTLLNR(0.056)H(0.789)K(0.208)NIH(0.909)TGEK(0.039)
O75290	41	1	55.9069	55.907	H	DQRTLYRDVMLENYSHLISLGSSISKPDVIT	DVMLENYSH(1)LISLGSSISK(1)
O75376	2016	0.450101	0.814305	59.426	H	QAENDPTRQYEGPLHHYRPQQESPSPQQQLP	QYEGPLH(0.177)H(0.45)YR(0.373)PQQESPSPQQQLPPSSQAEGMGQVPR
O75410	265	1	66.463	90.689	H	TNAAVEGTPLPKASYHFSPEELDENTSPLLG	ASYH(1)FSPEELDENTSPLLGDAR
O75533	260	0.998555	28.4152	69.551	H	PGATPGSKIWDPTPSHTPAGAATPGRGDTPG	IWDPTPSH(0.999)TPAGAATPGR(0.995)GDTPGH(0.007)ATPGHGGATSSAR
O75533	276	0.998054	32.3214	68.041	H	TPAGAATPGRGDTPGHATPGHGGATSSARKN	IWDPTPSH(0.992)TPAGAATPGR(0.996)GDTPGH(0.998)ATPGH(0.011)GGATSSAR(0.003)
O75592	2922	0.834265	7.11762	55.985	H	DSTDSPGSENRAPSPHVVQENLHSEVVEVCT	APSPH(0.834)VVQENLH(0.162)SEVVEVCTSSTLK(0.004)
O75717	409	0.998784	30.3581	85.182	H	SLLKEEEEDGQEGSIHNLPLVTSQRPFYDGP	TGSSLLK(0.001)EEEEDGQEGSIH(0.999)NLPLVTSQRPFYDGPMPTPR
O75844	456	0.93231	11.3924	70.345	H	DNLGFPVSDWLFSMWHYSHPPLLERLQALKT	DNLGFPVSDWLFSMWH(0.932)YSH(0.068)PPLLER
O75896	61	0.840006	8.11832	66.467	H	TRRGSMFYDEDGDLAHEFYEETIVTKNGQKR	R(0.03)GSMFYDEDGDLAH(0.84)EFYEETIVTK(0.13)
O75909	19	0.961425	14.2764	77.1	H	NKENSSPSVTSANLDHTKPCWYWDKKDLAHT	ENSSPSVTSANLDH(0.961)TK(0.036)PCWYWDK(0.001)K(0.001)
O75925	500	1	77.7472	123.75	H	SPTSPLNNKGILSLPHQASPVSRTPSLPAVD	GILSLPH(1)QASPVSR
O94822	1559	0.95454	13.5331	41.423	H	EELQLSIRETTMLPYHIPHLACSVYHMTLKD	ETTMLPYH(0.955)IPH(0.046)LACSVYH(0.413)MTLK(0.481)DLPAMVR(0.105)
O94826	98	1	68.1967	99.238	H	RKTPEGRASPAPGSGHPEGPGAHLDMNSLDR	ASPAPGSGH(1)PEGPGAHLDMNSLDR
O94842	184	1	79.297	97.081	H	PEDRLSTTPSPTSSLHEDGVEDFRRQLPSQK	LSTTPSPTSSLH(1)EDGVEDFRR
O94875	172	0.999997	56.4736	88.637	H	SPNAFKDASSPVPPPHVPPPVPPLRPRDRSS	DASSPVPPPH(1)VPPPVPPLRPR
O94933	10	0.870471	8.27691	70.056	H	______MKPSIAEMLHRGRMLWIILLSTIAL	KPSIAEMLH(0.87)R(0.129)
O94967	343	0.740914	4.71917	58.47	H	DKRISDLGNKTSPMSHSFANFHYPGVQNLSR	ISDLGNK(0.25)TSPMSH(0.741)SFANFH(0.009)YPGVQNLSR
O94972	252	0.999786	39.1209	58.674	H	LISKSSEILMMFQQVHRKPMASFVTTPVPPD	SELISKSSEILMMFQQVH(1)R(1)
O95169	31	0.992998	22.2106	65.374	H	RASRNVMPLGARTASHMTKDMFPGPYPRTPE	ASRNVMPLGAR(0.001)TASH(0.993)MTK(0.006)
O95197	565	0.925699	11.0797	68.961	H	KTSKNFEELVSDSELHQDQPDILGRSPASEA	NFEELVSDSELH(0.926)QDQPDILGR(0.002)SPASEAACSK(0.072)
O95251	213	0.981364	17.2192	63.374	H	GKHERHFSISGCPLYHNLSADECKVRAQSRD	HFSISGCPLYH(0.981)NLSADECK(0.019)
O95297	235	0.991476	20.6706	96.777	H	PSDTEGLVKSLPSGSHQGPVIYAQLDHSGGH	SLPSGSH(0.991)QGPVIYAQLDHSGGHHSDK(0.008)
O95352	686	0.999912	40.5671	42.399	H	SSHSFLEDLTGLTLLHQETQAAEIWDMSDDE	VFNSSHSFLEDLTGLTLLH(1)QETQAAEIWDMSDDETI
O95400	240	0.999992	51.2258	60.18	H	LAMRLKGLGCQTLGPHNPTPPPSLDMFAEEL	GLGCQTLGPH(1)NPTPPPSLDMFAEELAEEELETPTPTQR
O95402	348	0.805461	6.48379	78.378	H	PSAESPVCWLEQPESHQRLAGPGCKAGLSPA	R(0.181)LELLPSAESPVCWLEQPESH(0.805)QR(0.014)
O95425	218	1	88.9604	95.236	H	ENQRRGQELSATRQAHDLSPAAESSSTFSFS	QAH(1)DLSPAAESSSTFSFSGR
O95503	226	0.999169	30.8024	101.33	H	KSKKFSESVLRTQIRHMKFGAFALYKPPPAP	H(0.999)MK(0.001)FGAFALYK
O95544	27	0.999978	47.5424	62.781	H	KELSPDAAAYCCSACHGDETWSYNHPIRGRA	ELSPDAAAYCCSACH(1)GDETWSYNHPIR
O95613	603	0.999847	38.3321	93.92	H	ESLPRFQAELEESHRHQLEALESPLCIQHEG	H(1)QLEALESPLCIQHEGHVSDR
O95684	155	0.944445	15.1049	68.705	H	KGPTTGEGALDLSDVHSPPKSPEGKTSAQTT	EKGPTTGEGALDLSDVH(0.944)SPPK(0.029)SPEGK(0.026)
O95714	1363	0.82326	9.30277	45.842	H	TSQIHYSYNEEKDEDHCSSPGGTPASKSRLC	WLQSSIFSGGLQTSQIH(0.097)YSYNEEK(0.052)DEDH(0.823)CSSPGGTPASK(0.028)
O95718	422	1	69.6504	69.65	H	VQHFYSVKLQGKVPMHKLFLEMLEAKV____	VPMH(1)K(1)LFLEMLEAK(1)V
O95785	1150	0.998786	29.1532	125.04	H	PLAKKLPPPPGSPLGHSPTASPPPTARKMFP	K(0.001)LPPPPGSPLGH(0.999)SPTASPPPTAR
O95819	693	0.973532	17.2902	77.469	H	GSSSGSSNSGSQPGSHPGSQSGSGERFRVRS	LVPR(0.018)PGSGSSSGSSNSGSQPGSH(0.974)PGSQSGSGER(0.008)
O95819	612	0.839297	7.2158	51.398	H	PSRSESFSNGNSESVHPALQRPAEPQVPVRT	SESFSNGNSESVH(0.839)PALQR(0.159)PAEPQVPVR(0.001)
P00505	5	0.999953	42.9521	45.305	H	___________MALLHSGRVLPGIAAAFHPG	MALLH(1)SGR(1)VLPGIAAAFH(0.072)PGLAAAASAR(0.928)
P00533	988	1	100.927	126.31	H	RDPQRYLVIQGDERMHLPSPTDSNFYRALMD	MH(1)LPSPTDSNFYR
P01106	287	0.782694	8.25519	79.511	H	APGKRSESGSPSAGGHSKPPHSPLVLKRCHV	SESGSPSAGGH(0.783)SK(0.075)PPH(0.025)SPLVLK(0.117)
P01106	292	0.58867	1.56643	68.705	H	SESGSPSAGGHSKPPHSPLVLKRCHVSTHQH	RSESGSPSAGGHSK(0.001)PPH(0.589)SPLVLK(0.41)
P04049	236	0.890913	11.5961	62.398	H	VSRMPVSSQHRYSTPHAFTFNTSSPSSEGSL	MPVSSQH(0.062)R(0.047)YSTPH(0.891)AFTFNTSSPSSEGSLSQR
P04049	264	1	86.5605	120.53	H	GSLSQRQRSTSTPNVHMVSTTLPVDSRMIED	STSTPNVH(1)MVSTTLPVDSR
P04920	453	0.932518	10.5348	55.871	H	FPRNISAGSLGSLLGHHHGQGAESDPHVTEP	NISAGSLGSLLGH(0.933)H(0.783)H(0.275)GQGAESDPH(0.01)VTEPLMGGVPETR
P04920	454	0.782838	5.34901	55.871	H	PRNISAGSLGSLLGHHHGQGAESDPHVTEPL	NISAGSLGSLLGH(0.933)H(0.783)H(0.275)GQGAESDPH(0.01)VTEPLMGGVPETR
P04920	455	0.620305	0.469895	51.868	H	RNISAGSLGSLLGHHHGQGAESDPHVTEPLM	NISAGSLGSLLGH(0.584)H(0.62)H(0.62)GQGAESDPH(0.175)VTEPLMGGVPETR
P06493	162	1	107.494	120.31	H	FGLARAFGIPIRVYTHEVVTLWYRSPEVLLG	VYTH(1)EVVTLWYR
P06748	115	0.972995	15.6379	111.45	H	LRLKCGSGPVHISGQHLVAVEEDAESEDEEE	CGSGPVHISGQH(0.973)LVAVEEDAESEDEEEEDVK(0.027)
P06748	58	0.905701	11.5947	69.639	H	SLRTVSLGAGAKDELHIVEAEAMNYEGSPIK	TVSLGAGAK(0.063)DELH(0.906)IVEAEAMNYEGSPIK(0.017)VTLATLK(0.014)
P07355	17	0.969439	15.0135	121.21	H	STVHEILCKLSLEGDHSTPPSAYGSVKAYTN	LSLEGDH(0.969)STPPSAYGSVK(0.031)
P07919	62	1	83.0368	97.291	H	RERLELCDERVSSRSHTEEDCTEELFDFLHA	SH(1)TEEDCTEELFDFLHAR
P07947	31	0.997325	25.6717	49.356	H	YRPENTPEPVSTSVSHYGAEPTTVSPCPSSS	YR(0.012)PENTPEPVSTSVSH(0.997)YGAEPTTVSPCPSSSAK(0.99)
P08235	249	0.986285	18.8912	86.539	H	PLTCSPNVENRGSRSHSPAHASNVGSPLSSP	SH(0.986)SPAH(0.013)ASNVGSPLSSPLSSMK(0.001)
P08559	290	0.994337	22.4458	160.91	H	SGKGPILMELQTYRYHGHSMSDPGVSYRTRE	YH(0.994)GH(0.006)SMSDPGVSYR
P08559	292	0.99941	32.2869	141.89	H	KGPILMELQTYRYHGHSMSDPGVSYRTREEI	YH(0.001)GH(0.999)SMSDPGVSYR
P08648	11	0.980349	16.9804	67.334	H	_____MGSRTPESPLHAVQLRWGPRRRPPLL	MGSRTPESPLH(0.98)AVQLR(0.02)
P08651	374	0.859321	7.85962	54.324	H	VHSGIARSPHPSSALHFPTTSILPQTASTYF	SPH(0.141)PSSALH(0.859)FPTTSILPQTASTYFPHTAIR
P09234	15	0.999946	42.637	80.488	H	_MPKFYCDYCDTYLTHDSPSVRKTHCSGRKH	FYCDYCDTYLTH(1)DSPSVR
P0C7T5	213	0.849366	7.51177	71.54	H	FNKAPSATSPSGQLPHHSSTQPLDLAPGRMP	APSATSPSGQLPH(0.849)H(0.151)SSTQPLDLAPGR
P0CF97	329	0.808178	6.95155	52.045	H	LEVTNNGAVWNHCFIHREGLASREIPQNLME	VIK(1)K(1)LLEVTNNGAVWNH(0.029)CFIH(0.808)R(0.163)
Q3ZM63	45	0.783373	6.09348	72.662	H	TENVLIFLINRQLGRHRSDIDLSRWVWMLS_	PTENVLIFLINR(0.217)QLGR(0.783)H(0.783)R(0.217)
P0DTE2	74	0.934322	11.592	53.504	H	GKGLEWVAVIWRGESHQYNADYVRGRLTTSR	GLEWVAVIWR(0.001)GESH(0.934)QYNADYVR(0.065)
P0DUX1	12	0.941515	12.0681	63.16	H	____MGQILGKIMMSHQPQPQEEQSPQRSTS	GQILGK(0.058)IMMSH(0.942)QPQPQEEQSPQR
P10074	178	0.811252	8.29352	73.459	H	DQEPRGSHSPQRPQLHSPAQSEGPSSLCGKL	GSH(0.004)SPQR(0.064)PQLH(0.811)SPAQSEGPSSLCGK(0.12)
P10144	30	0.928873	12.9331	44.829	H	RADAGEIIGGHEAKPHSRPYMAYLMIWDQKS	PH(0.929)SR(0.772)PYMAYLMIWDQK(0.161)SLK(0.139)
P10398	219	1	84.4631	85.697	H	NAPLQRIRSTSTPNVHMVSTTAPMDSNLIQL	STSTPNVH(1)MVSTTAPMDSNLIQLTGQSFSTDAAGSR
P11172	211	0.953578	13.1264	90.316	H	RVKRFIQENVFVAANHNGSPLSIKEAPKELS	RFIQENVFVAANH(0.954)NGSPLSIK(0.046)
P11274	423	0.999931	41.5806	55.022	H	RKTGQIWPNDGEGAFHGDADGSFGTPPGYGC	TGQIWPNDGEGAFH(1)GDADGSFGTPPGYGCAADR
P11717	2403	0.903716	9.72479	83.065	H	NGHITTKSVKALSSLHGDDQDSEDEVLTIPE	ALSSLH(0.904)GDDQDSEDEVLTIPEVK(0.096)
P11940	595	0.999888	39.5156	58.914	H	KITGMLLEIDNSELLHMLESPESLRSKVDEA	ITGMLLEIDNSELLH(1)MLESPESLR
P12111	1725	0.861088	7.96572	83.877	H	VYKGGRHANTKVGLEHLRVNHFVPEAGSRLD	GGR(0.577)H(0.423)ANTKVGLEH(0.861)LR(0.139)
P12270	2125	0.825585	6.75334	57.076	H	GRGLQLTPGIGGMQQHFFDDEDRTVPSTPTL	GLQLTPGIGGMQQH(0.826)FFDDEDR(0.174)TVPSTPTLVVPHR
P12270	2154	1	88.3657	134.13	H	TLVVPHRTDGFAEAIHSPQVAGVPRFRFGPP	TDGFAEAIH(1)SPQVAGVPR
P12277	296	1	63.2903	63.29	H	LTCPSNLGTGLRAGVHIKLPNLGKHEKFSEV	AGVH(1)IK(1)LPNLGK(1)H(1)EK(1)
P12277	305	1	63.2903	63.29	H	GLRAGVHIKLPNLGKHEKFSEVLKRLRLQKR	AGVH(1)IK(1)LPNLGK(1)H(1)EK(1)
P12694	336	0.814291	5.63092	72.769	H	NQPFLIEAMTYRIGHHSTSDDSSAYRSVDEV	IGH(0.349)H(0.814)STSDDSSAYR(0.821)SVDEVNYWDK(0.016)QDHPISR
P12931	25	0.998943	29.7555	90.899	H	DASQRRRSLEPAENVHGAGGGAFPASQTPSK	SLEPAENVH(0.999)GAGGGAFPASQTPSK(0.001)PASADGHR
P13378	69	0.985466	20.4501	94.48	H	YGNSAAGFPHAPPQAHAHPHPSPPPSGTGCG	HAAAAAALQLYGNSAAGFPH(0.009)APPQAH(0.985)AH(0.004)PH(0.001)PSPPPSGTGCGGR
P13378	71	0.329608	0	62.27	H	NSAAGFPHAPPQAHAHPHPSPPPSGTGCGGR	HAAAAAALQLYGNSAAGFPH(0.283)APPQAH(0.33)AH(0.33)PH(0.058)PSPPPSGTGCGGR
P13533	668	0.94904	13.6052	45.28	H	HRENLNKLMTNLRTTHPHFVRCIIPNERKAP	LMTNLR(0.022)TTH(0.949)PH(0.949)FVR(0.079)CIIPNER(0.001)
P13533	670	0.94904	13.6052	45.28	H	ENLNKLMTNLRTTHPHFVRCIIPNERKAPGV	LMTNLR(0.022)TTH(0.949)PH(0.949)FVR(0.079)CIIPNER(0.001)
P13611	22	0.902294	11.7601	47.646	H	SILWMCSTLIVTHALHKVKVGKSPPVRGSLS	MFINIK(0.104)SILWMCSTLIVTH(0.152)ALH(0.902)K(0.937)VK(0.905)
P14222	222	1	64.8903	75.739	H	STQPAYLRLISNYGTHFIRAVELGGRISALT	LISNYGTH(1)FIR(0.978)AVELGGR(0.022)
P14618	5	0.494522	0	75.82	H	___________MSKPHSEAGTAFIQTQQLHA	SK(0.495)PH(0.495)SEAGTAFIQTQQLH(0.011)AAMADTFLEHMCR
P14618	19	0.805034	9.17419	51.296	H	PHSEAGTAFIQTQQLHAAMADTFLEHMCRLD	SK(0.097)PH(0.097)SEAGTAFIQTQQLH(0.805)AAMADTFLEHMCR
P15408	22	0.908496	9.40296	50.88	H	GNFDTSSRGSSGSPAHAESYSSGGGGQQKFR	MYQDYPGNFDTSSR(0.889)GSSGSPAH(0.908)AESYSSGGGGQQK(0.202)
P15408	80	0.999971	45.4909	99.273	H	QPTVITSMSNPYPRSHPYSPLPGLASVPGHM	SH(1)PYSPLPGLASVPGHMALPR
P15924	413	0.966275	14.6662	69.261	H	SIRKKYPCDKNMPLQHLLEQIKELEKEREKI	YPCDK(0.001)NMPLQH(0.966)LLEQIK(0.033)
P16070	711	0.87654	8.5127	60.938	H	PSGLNGEASKSQEMVHLVNKESSETPDQFMT	SQEMVH(0.877)LVNK(0.123)ESSETPDQFMTADETR
P16144	1472	0.999105	30.645	65.949	H	SLHRMTTTSAAAYGTHLSPHVPHRVLSTSST	MTTTSAAAYGTH(0.999)LSPH(0.001)VPHR
P17020	61	0.885451	8.90777	73.077	H	GTPCCSDTELEAICPHYQQPDCDTRTEDKEF	VR(0.001)DAPAVTH(0.114)PGSAACGTPCCSDTELEAICPH(0.885)YQQPDCDTR
P17483	128	0.853465	8.52003	46.772	H	VSSSPPPPPCAQNPLHPSPSHSACKEPVVYP	CEAVSSSPPPPPCAQNPLH(0.853)PSPSH(0.12)SACK(0.026)EPVVYPWMR
P17544	430	0.999936	41.9719	48.626	H	KESSEPTGSPAPVIQHSSATAPSNGLSVRSA	ESSEPTGSPAPVIQH(1)SSATAPSNGLSVR
P17544	250	0.909925	10.044	51.089	H	PGPPVNSSGSISPSGHPIPSEAKMRLKATLT	PVSMVPNIPGIPGPPVNSSGSISPSGH(0.91)PIPSEAK(0.09)
P18583	2127	0.893189	14.2556	102.21	H	IAQSKEDDDVIVNKPHVSDEEEEEPPFYHHP	QIAQSK(0.026)EDDDVIVNK(0.034)PH(0.893)VSDEEEEEPPFYH(0.021)H(0.023)PFK(0.002)
P18669	130	0.536553	0.776357	86.575	H	WRRSYDVPPPPMEPDHPFYSNISKDRRYADL	R(0.015)SYDVPPPPMEPDH(0.537)PFYSNISK(0.449)
P19484	148	0.497736	0	41.575	H	SSAGNSAPNSPMAMLHIGSNPERELDDVIDN	AGHVLSSSAGNSAPNSPMAMLH(0.498)IGSNPER(0.498)ELDDVIDNIMR(0.004)
P19484	326	0.995587	23.533	114.37	H	QLWLRIQELEMQARVHGLPTTSPSGMNMAEL	VH(0.996)GLPTTSPSGMNMAELAQQVVK(0.004)
P19827	188	0.9989	29.5812	68.277	H	MQYEIVIKVKPKQLVHHFEIDVDIFEPQGIS	QLVH(0.999)H(1)FEIDVDIFEPQGISK(0.001)
P19827	189	0.999865	38.6951	68.277	H	QYEIVIKVKPKQLVHHFEIDVDIFEPQGISK	QLVH(0.999)H(1)FEIDVDIFEPQGISK(0.001)
P20020	1142	0.999936	42.0195	79.633	H	SLYEGLEKPESRSSIHNFMTHPEFRIEDSEP	SSIH(1)NFMTHPEFR
P20393	318	0.999963	45.9947	61.963	H	AHDKLGSSPGNFNANHASGSPPATTPHRWEN	LGSSPGNFNANH(1)ASGSPPATTPHR
P20908	196	0.999999	61.9313	68.173	H	LDCKKKTTKFLDRSDHPMIDINGIIVFGTRI	SDH(1)PMIDINGIIVFGTR
P21333	2159	0.916916	11.0476	89.751	H	ITRRRRAPSVANVGSHCDLSLKIPEISIQDM	APSVANVGSH(0.917)CDLSLK(0.072)IPEISIQDMTAQVTSPSGK(0.011)
P21333	2315	0.716567	4.02806	83.499	H	QEPGDYEVSVKFNEEHIPDSPFVVPVASPSG	FNEEH(0.717)IPDSPFVVPVASPSGDAR(0.283)
P21333	2058	0.824967	8.8771	54.12	H	EIGDASRVRVSGQGLHEGHTFEPAEFIIDTR	VR(0.068)VSGQGLH(0.825)EGH(0.107)TFEPAEFIIDTR
P21333	2061	0.99997	45.6127	101.33	H	DASRVRVSGQGLHEGHTFEPAEFIIDTRDAG	VRVSGQGLHEGH(1)TFEPAEFIIDTR
P21452	232	0.946893	12.5043	61.127	H	YSVIGLTLWRRAVPGHQAHGANLRHLQAMKK	R(0.056)AVPGH(0.947)QAH(0.997)GANLRHLQAMK
P21452	235	0.996571	24.6758	61.127	H	IGLTLWRRAVPGHQAHGANLRHLQAMKKFVK	R(0.056)AVPGH(0.947)QAH(0.997)GANLRHLQAMK
P22670	203	0.860211	7.93795	89.659	H	KGGQVSLTVHGTQQVHSPPEQSPVQANSSSS	GGQVSLTVH(0.001)GTQQVH(0.86)SPPEQSPVQANSSSSK(0.138)
P23497	280	0.995916	23.892	53.209	H	PCPLPCDEESPEAELHNHGIQINSCSVRLVD	EMPCPLPCDEESPEAELH(0.996)NH(0.004)GIQINSCSVR
P23497	26	0.999942	42.9666	114.66	H	RRLNECISPVANEMNHLPAHSHDLQRMFTED	RLNECISPVANEMNH(1)LPAHSHDLQR
P23497	194	0.959484	16.0397	51.479	H	NSFRSLTWPPSGSPSHAGTTPPENGLSEHPC	SLTWPPSGSPSH(0.959)AGTTPPENGLSEH(0.024)PCETEQINAK(0.017)
P24941	161	1	121.47	134.26	H	FGLARAFGVPVRTYTHEVVTLWYRAPEILLG	TYTH(1)EVVTLWYR
P25054	1092	1	112.847	148.56	H	VYTESTDDKHLKFQPHFGQQECVSPYRSRGA	FQPH(1)FGQQECVSPYR
P26045	393	0.999994	51.8759	102.46	H	NWRSPRLRHEIRKPRHSSADNLANEMTYITE	H(1)SSADNLANEMTYITETEDVFYTYK
P26641	37	0.359543	0.546003	61.648	H	AQYSGAQVRVLSAPPHFHFGQTNRTPEFLRK	VLSAPPH(0.36)FH(0.317)FGQTNR(0.317)TPEFLR(0.006)
P26641	39	0.844348	7.35746	128.57	H	YSGAQVRVLSAPPHFHFGQTNRTPEFLRKFP	VLSAPPHFH(0.844)FGQTNR(0.155)TPEFLR
P27708	1911	0.995021	26.5593	75.11	H	PRQASPQNLGTPGLLHPQTSPLLHSLVGQHI	QASPQNLGTPGLLH(0.995)PQTSPLLH(0.002)SLVGQH(0.001)ILSVQQFTK(0.002)
P27816	89	0.930338	11.2564	59.943	H	EDTPSSKPTLLANGGHGVEGSDTTGSPTEFL	PTLLANGGH(0.93)GVEGSDTTGSPTEFLEEK(0.07)
P28290	481	0.803394	8.42201	60.009	H	SFEMEEVQSTEGEAPHVPATYQLGLTKSKRD	NIMTQQK(0.116)DSFEMEEVQSTEGEAPH(0.803)VPATYQLGLTK(0.081)
P28290	124	0.721586	6.82929	48.697	H	GGSFEDDLSLGAEANHLHESDAQIENCNNIL	NGGSFEDDLSLGAEANH(0.722)LH(0.129)ESDAQIENCNNILAK(0.15)
P28290	126	0.71433	4.53477	51.9	H	SFEDDLSLGAEANHLHESDAQIENCNNILAK	NGGSFEDDLSLGAEANH(0.251)LH(0.714)ESDAQIENCNNILAK(0.034)
P28290	617	1	68.3503	68.43	H	IENTGTKQSTCSPGDHIIEITEVEEDLFPAE	QSTCSPGDH(1)IIEITEVEEDLFPAETVELLR
P28290	439	0.955091	13.2771	97.776	H	SSHSELENSSELKSVHISTPEKEPCAPLTIP	SVH(0.955)ISTPEK(0.045)EPCAPLTIPSIR
P28290	868	1	96.1242	98.073	H	WQERPLCEHTRTLSTHSVPNISGATCSAFAS	TLSTH(1)SVPNISGATCSAFASPFGCPYSHR
P28329	494	0.984466	16.5932	69.259	H	APRRLRWKCSPEIQGHLASSAEKLQRIVKNL	LRWK(0.291)CSPEIQGH(0.984)LASSAEK(0.724)
P29320	679	0.999999	56.9566	60.938	H	RRDFLGEASIMGQFDHPNIIRLEGVVTKSKP	QR(0.5)R(0.5)DFLGEASIMGQFDH(1)PNIIR(1)
P29590	521	0.999891	39.6482	73.707	H	PEQPRPSTSKAVSPPHLDGPPSPRSPVIGSE	AVSPPH(1)LDGPPSPR(1)SPVIGSEVFLPNSNHVASGAGEAEER
P29590	544	0.649301	2.63405	62.853	H	RSPVIGSEVFLPNSNHVASGAGEAEERVVVI	AVSPPH(0.357)LDGPPSPR(0.994)SPVIGSEVFLPNSNH(0.649)VASGAGEAEER
P31629	1058	0.601703	1.79176	77.053	H	VPEVRSKSFDYGNLSHAPVSGAAASTVSPSR	SK(0.398)SFDYGNLSH(0.602)APVSGAAASTVSPSR
P31944	201	1	64.2227	78.692	H	CFIQTLVDVFTKRKGHILELLTEVTRRMAEA	K(1)GH(1)ILELLTEVTR
P33151	42	0.467417	0	113.66	H	GANPAQRDTHSLLPTHRRQKRDWIWNQMHID	DTHSLLPTH(0.467)R(0.467)R(0.065)
P33176	929	0.992846	21.9113	130.87	H	RGHSAQIAKPIRPGQHPAASPTHPSAIRGGG	PIR(0.006)PGQH(0.993)PAASPTH(0.001)PSAIR
P33176	936	0.969189	17.9965	171.49	H	AKPIRPGQHPAASPTHPSAIRGGGAFVQNSQ	PIR(0.015)PGQH(0.015)PAASPTH(0.969)PSAIR
P35222	36	0.957154	13.5918	44.844	H	AVSHWQQQSYLDSGIHSGATTTAPSLSGKGN	AAVSH(0.001)WQQQSYLDSGIH(0.957)SGATTTAPSLSGK(0.042)
P35568	1141	0.610954	4.259	101.23	H	GGGGGSSSSSEDVKRHSSASFENVWLRPGEL	H(0.611)SSASFENVWLR(0.16)PGELGGAPK(0.229)
P35637	275	0.999959	43.8606	65.69	H	GGFNKFGGPRDQGSRHDSEQDNSDNNTIFVQ	H(1)DSEQDNSDNNTIFVQGLGENVTIESVADYFK
P35658	1084	0.999993	52.6344	148.62	H	MLATKTVKHGAPSPSHPISAPQAAAAAALRR	HGAPSPSH(1)PISAPQAAAAAALR
P36507	292	0.994081	23.9026	79.029	H	AIFGRPVVDGEEGEPHSISPRPRPPGRPVSG	ELEAIFGR(0.004)PVVDGEEGEPH(0.994)SISPR(0.002)
P36507	308	0.947499	12.5642	133.42	H	SISPRPRPPGRPVSGHGMDSRPAMAIFELLD	PRPPGR(0.053)PVSGH(0.947)GMDSR
P36871	118	0.935183	11.592	56.304	H	IRKIKAIGGIILTASHNPGGPNGDFGIKFNI	AIGGIILTASH(0.935)NPGGPNGDFGIK(0.065)
P37275	157	0.999999	62.9762	63.803	H	APEEDQRQGTPEASGHDENGTPDAFSQLLTC	QGTPEASGH(1)DENGTPDAFSQLLTCPYCDR
P38159	128	0.5	0	74.364	H	RGGSGGTRGPPSRGGHMDDGGYSMNFNMSSS	GPPSR(0.5)GGH(0.5)MDDGGYSMNFNMSSSR
P38398	117	0.96039	13.8464	118.84	H	ANSYNFAKKENNSPEHLKDEVSIIQSMGYRN	ENNSPEH(0.96)LK(0.04)DEVSIIQSMGYR
P38398	1195	0.998672	28.7624	73.219	H	SVQKGELSRSPSPFTHTHLAQGYRRGAKKLE	SPSPFTH(0.999)TH(0.001)LAQGYR
P38398	1545	0.999979	46.8678	58.284	H	KVVDVEEQQLEESGPHDLTETSYLPRQDLEG	VVDVEEQQLEESGPH(1)DLTETSYLPR
P39880	1214	0.999681	34.9864	64.726	H	MDMKRMEKKAYMKRRHSSVSDSQPCEPPSVG	H(1)SSVSDSQPCEPPSVGTEYSQGASPQPQHQLK
P39880	1242	0.840863	7.22958	71.159	H	SVGTEYSQGASPQPQHQLKKPRVVLAPEEKE	RHSSVSDSQPCEPPSVGTEYSQGASPQPQH(0.841)QLK(0.159)
P40189	662	1	91.0735	170.47	H	IKKHIWPNVPDPSKSHIAQWSPHTPPRHNFN	SH(1)IAQWSPHTPPR
P40617	116	0.995318	21.5281	65.836	H	DSVDVERMEEAKTELHKITRISENQGVPVLI	TELH(0.995)K(0.334)ITR(0.89)ISENQGVPVLIVANK(0.78)
P40939	753	0.989523	22.3605	91.616	H	AAYGKQFTPCQLLADHANSPNKKFYQ_____	QFTPCQLLADH(0.99)ANSPNK(0.006)K(0.005)
P41002	773	1	138.663	142.74	H	SSVPQQQVKRINLCIHSEEEDMNLGLVRL__	INLCIH(1)SEEEDMNLGLVR
P41162	158	0.999752	36.1387	83.252	H	VPTASSRFHFPPLDTHSPTNDVQPGRFSASS	FHFPPLDTH(1)SPTNDVQPGR
P41236	76	0.999999	58.5212	70.666	H	KDYGLMKIDEPSTPYHSMMGDDEDACSDTEA	IDEPSTPYH(1)SMMGDDEDACSDTEATEAMAPDILAR
P42167	304	1	120.825	134.37	H	SNESLVVNRVTGNFKHASPILPITEFSDIPR	H(1)ASPILPITEFSDIPR
P42694	1627	0.999993	51.4366	126.63	H	SRSPPAVPSPPSSTDHSSHFSNFNDNSRDIE	SPPAVPSPPSSTDH(1)SSH(1)FSNFNDNSR
P42694	1630	0.999996	54.2336	83.966	H	PPAVPSPPSSTDHSSHFSNFNDNSRDIEVAS	SPPAVPSPPSSTDH(1)SSH(1)FSNFNDNSR
P43243	241	0.78592	8.15233	59.996	H	DGERCRDDSFFGETSHNYHKFDSEYERMGRG	CR(0.013)DDSFFGETSH(0.786)NYH(0.081)K(0.12)FDSEYER
P43243	204	0.757552	4.94794	103.71	H	FDDRGPSLNPVLDYDHGSRSQESGYYDRMDY	GPSLNPVLDYDH(0.758)GSR(0.242)SQESGYYDR
P43243	70	0.830373	6.8978	71.688	H	LMNLGMSSSLNQQGAHSALSSASTSSHNLQS	LASLMNLGMSSSLNQQGAH(0.83)SALSSASTSSH(0.17)NLQSIFNIGSR
P43354	239	0.998169	27.7794	76.818	H	IRKPASMGFPGLQIGHASQLLDTQVPSPPSR	K(0.002)PASMGFPGLQIGH(0.998)ASQLLDTQVPSPPSR
P43487	11	0.432736	1.43791	45.518	H	_____MAAAKDTHEDHDTSTENTDESNHDPQ	DTH(0.036)EDH(0.433)DTSTENTDESNH(0.22)DPQFEPIVSLPEQEIK(0.311)
P43487	23	0.999098	32.9716	81.197	H	HEDHDTSTENTDESNHDPQFEPIVSLPEQEI	DTHEDH(0.001)DTSTENTDESNH(0.999)DPQFEPIVSLPEQEIK
P46013	710	0.570317	1.56325	80.868	H	PKKPVGEVHSQFSTGHANSPCTIIIGKAHTE	K(0.032)PVGEVHSQFSTGH(0.57)ANSPCTIIIGK(0.398)
P46087	489	0.980093	17.0825	98.592	H	AVKTNKDEKDILRCAHLQKELLLSAIDSVNA	CAH(0.98)LQK(0.019)ELLLSAIDSVNATSK(0.001)
P46100	638	1	106.997	119.34	H	KLEKCGLGQENSDNEHLVENEVSLLLEESDL	CGLGQENSDNEH(1)LVENEVSLLLEESDLRR
P46379	93	1	73.172	115.06	H	GGKVIHLVERAPPQTHLPSGASSGTGSASAT	APPQTH(1)LPSGASSGTGSASATHGGGSPPGTR
P46379	109	0.997694	26.8674	64.298	H	LPSGASSGTGSASATHGGGSPPGTRGPGASV	APPQTH(0.002)LPSGASSGTGSASATH(0.998)GGGSPPGTR
P46531	2125	0.992029	23.6576	43.462	H	VRLLDEYNLVRSPQLHGAPLGGTPTLSPPLC	SPQLH(0.992)GAPLGGTPTLSPPLCSPNGYLGSLK(0.004)PGVQGK(0.004)
P46821	1815	1	125.308	165.78	H	FSDSTSAVKEKTATCHSSSSPPIDAASAEPY	TATCH(1)SSSSPPIDAASAEPYGFR
P46821	1669	0.490645	0	54.136	H	PEQSLAMDFSRQSPDHPTVGAGVLHITENGP	QSPDH(0.491)PTVGAGVLH(0.491)ITENGPTEVDYSPSDMQDSSLSHK(0.019)
P46821	1678	0.998115	27.72	83.874	H	SRQSPDHPTVGAGVLHITENGPTEVDYSPSD	QSPDHPTVGAGVLH(0.998)ITENGPTEVDYSPSDMQDSSLSHK(0.002)
P46821	1333	1	46.772	52.276	H	LEVVSPSQSVTGSAGHTPYYQSPTDEKSSHL	TLEVVSPSQSVTGSAGH(1)TPYYQSPTDEK(1)
P46937	126	1	98.2052	125.86	H	DAGTAGALTPQHVRAHSSPASLQLGAVSPGT	AH(1)SSPASLQLGAVSPGTLTPTGVVSGPAATPTAQHLR
P46937	159	0.999996	54.4525	75.261	H	PTGVVSGPAATPTAQHLRQSSFEIPDDVPLP	AHSSPASLQLGAVSPGTLTPTGVVSGPAATPTAQH(1)LR(1)
P47712	442	0.706384	4.77584	84.226	H	KHIVSNDSSDSDDESHEPKGTENEDAGSDYQ	H(0.058)IVSNDSSDSDDESH(0.706)EPK(0.235)GTENEDAGSDYQSDNQASWIHR
P47974	56	0.455262	0	69.272	H	AAAPSSGFAPGFLRRHSASNLHALAHPAPSP	R(0.455)H(0.455)SASNLH(0.085)ALAH(0.004)PAPSPGSCSPK
P47974	62	0.556838	4.00408	61.985	H	GFAPGFLRRHSASNLHALAHPAPSPGSCSPK	R(0.221)H(0.221)SASNLH(0.557)ALAHPAPSPGSCSPK
P48059	213	0.799695	6.02744	52.365	H	RPIEGRVVNAMGKQWHVEHFVCAKCEKPFLG	VVNAMGK(0.2)QWH(0.8)VEH(0.955)FVCAK(0.019)CEK(0.025)
P48059	216	0.955193	15.7168	52.365	H	EGRVVNAMGKQWHVEHFVCAKCEKPFLGHRH	VVNAMGK(0.2)QWH(0.8)VEH(0.955)FVCAK(0.019)CEK(0.025)
P48730	351	0.699816	3.68929	59.083	H	GTQEVAPPTPLTPTSHTANTSPRPVSGMERE	GTQEVAPPTPLTPTSH(0.7)TANTSPR(0.299)PVSGMER(0.001)
P49711	401	0.568059	1.18969	76.156	H	YASRDTYKLKRHMRTHSGEKPYECYICHARF	TH(0.568)SGEK(0.432)PYECYICHAR
P49759	335	0.977347	16.3492	126.5	H	DIKVVDFGSATYDDEHHSTLVSTRHYRAPEV	VVDFGSATYDDEH(0.977)H(0.023)STLVSTR
P49760	150	0.999942	42.4074	74.325	H	HSSRRAKSVEDDAEGHLIYHVGDWLQERYEI	SVEDDAEGH(1)LIYHVGDWLQER
P49792	922	0.999361	32.0386	69.7	H	RLPPQQHIYAYPQQMHTPPVQSSSACMFSQE	LPPQQH(0.001)IYAYPQQMH(0.999)TPPVQSSSACMFSQEMYGPPALR
P49792	1162	0.965496	14.6187	72.221	H	LETANKNHETDGGSAHGDDDDDGPHFEPVVP	NHETDGGSAH(0.965)GDDDDDGPH(0.033)FEPVVPLPDKIEVK(0.001)
P49792	1171	0.825474	7.28145	63.893	H	TDGGSAHGDDDDDGPHFEPVVPLPDKIEVKT	NH(0.001)ETDGGSAH(0.154)GDDDDDGPH(0.825)FEPVVPLPDK(0.004)IEVK(0.016)
P50402	131	0.944417	11.5468	100.95	H	AVRQSVTSFPDADAFHHQVHDDDLLSSSEEE	QSVTSFPDADAFH(0.944)H(0.804)QVH(0.245)DDDLLSSSEEECK(0.006)DR(0.001)
P50402	132	0.804055	5.94371	100.95	H	VRQSVTSFPDADAFHHQVHDDDLLSSSEEEC	QSVTSFPDADAFH(0.944)H(0.804)QVH(0.245)DDDLLSSSEEECK(0.006)DR(0.001)
P50402	135	0.783499	7.06598	72.231	H	SVTSFPDADAFHHQVHDDDLLSSSEEECKDR	QSVTSFPDADAFH(0.043)H(0.154)QVH(0.783)DDDLLSSSEEECK(0.019)DR
P50443	9	0.999303	33.3124	59.912	H	_______MSSESKEQHNVSPRDSAEGNDSYP	EQH(0.999)NVSPR(1)DSAEGNDSYPSGIH(0.001)LELQR
P50548	317	1	87.9903	161.62	H	HFSFSPEDMKRYLQAHTQSVYNYHLSPRAFL	YLQAH(1)TQSVYNYHLSPR
P50548	325	0.957248	13.5014	72.315	H	MKRYLQAHTQSVYNYHLSPRAFLHYPGLVVP	YLQAHTQSVYNYH(0.957)LSPR(0.043)
P50570	763	0.994761	22.7843	96.024	H	VPPPVDDTWLQSASSHSPTPQRRPVSSIHPP	EALNIIGDISTSTVSTPVPPPVDDTWLQSASSH(0.995)SPTPQR(0.005)
P51587	739	0.992265	21.0756	48.422	H	KKVSDIKEEVLAAACHPVQHSKVEYSDTDFQ	VSDIK(0.009)EEVLAAACH(0.992)PVQH(0.999)SK(1)VEYSDTDFQSQK(1)
P51587	743	0.999105	30.4434	48.422	H	DIKEEVLAAACHPVQHSKVEYSDTDFQSQKS	VSDIK(0.009)EEVLAAACH(0.992)PVQH(0.999)SK(1)VEYSDTDFQSQK(1)
P51636	21	0.997542	26.0501	78.513	H	EKADVQLFMDDDSYSHHSGLEYADPEKFADS	ADVQLFMDDDSYSH(0.998)H(0.993)SGLEYADPEK(0.01)
P51636	22	0.992534	21.2259	78.513	H	KADVQLFMDDDSYSHHSGLEYADPEKFADSD	ADVQLFMDDDSYSH(0.998)H(0.993)SGLEYADPEK(0.01)
P51798	58	0.997115	25.3943	59.561	H	GAARQSPRSALFRVGHMSSVELDDELLDPDM	VGH(0.997)MSSVELDDELLDPDMDPPHPFPK(0.003)
P51825	375	0.975144	18.121	55.049	H	LKEMTHSWPPPLTAIHTPSTAEPSKFPFPTK	EMTH(0.001)SWPPPLTAIH(0.975)TPSTAEPSK(0.015)FPFPTK(0.009)
P52594	172	0.952202	12.1484	80.355	H	VKPLKSLLGDSAPTLHLNKGTPSQSPVVGRS	SLLGDSAPTLH(0.952)LNK(0.832)GTPSQSPVVGR(0.216)
P52701	130	1	128.165	186.41	H	FDGTFIREKGKSVRVHVQFFDDSPTRGWVSK	VH(1)VQFFDDSPTR
P52732	236	0.986701	18.1828	50.851	H	RTTAATLMNAYSSRSHSVFSVTIHMKETTID	SH(0.987)SVFSVTIH(0.916)MK(0.849)ETTIDGEELVK(0.218)IGK(0.031)
P52732	244	0.916218	10.0867	50.851	H	NAYSSRSHSVFSVTIHMKETTIDGEELVKIG	SH(0.987)SVFSVTIH(0.916)MK(0.849)ETTIDGEELVK(0.218)IGK(0.031)
P52789	129	0.87859	8.59531	64.265	H	IPEDIMRGSGTQLFDHIAECLANFMDKLQIK	GSGTQLFDH(0.879)IAECLANFMDK(0.121)
P52799	263	0.653661	4.31925	119.68	H	LLLKYRRRHRKHSPQHTTTLSLSTLATPKRS	K(0.242)H(0.014)SPQH(0.654)TTTLSLSTLATPK(0.091)
P52943	54	0.480794	4.86535	58.938	H	LTPGGHAEHDGKPFCHKPCYATLFGPKGVNI	TLTPGGH(0.12)AEH(0.12)DGK(0.12)PFCH(0.481)K(0.157)PCYATLFGPK(0.001)
P52948	645	0.560032	3.14986	66.432	H	NGERFSFLSKPVDENHQQDGDEDSLVSHFYT	FSFLSK(0.271)PVDENH(0.56)QQDGDEDSLVSH(0.071)FYTNPIAK(0.098)
P52948	657	0.504525	0.234504	74.675	H	DENHQQDGDEDSLVSHFYTNPIAKPIPQTPE	PVDENH(0.001)QQDGDEDSLVSH(0.505)FYTNPIAK(0.478)PIPQTPESAGNK(0.016)
P52948	1763	0.751304	6.03082	65.887	H	AKRVANLLRVVLSLHHPPDRTSDSTPDPQRV	VVLSLH(0.187)H(0.751)PPDR(0.059)TSDSTPDPQR(0.002)VPLR
P53367	35	0.49678	0	57.432	H	EVDDSREHSFNRDLKHSLPSGLGLSETQITS	DLK(0.497)H(0.497)SLPSGLGLSETQITSHGFDNTK(0.006)
P54253	249	0.998358	27.8401	52.824	H	ITPGSPPPAQQNQYVHISSSPQNTGRTASPP	APGLITPGSPPPAQQNQYVH(0.998)ISSSPQNTGR(0.002)
P54278	514	0.953673	13.1358	73.616	H	TSVDSEGFSIPDTGSHCSSEYAASSPGDRGS	DSGHGSTSVDSEGFSIPDTGSH(0.954)CSSEYAASSPGDR(0.046)
P54687	351	1	58.4895	58.49	H	VVCPVSDILYKGETIHIPTMENGPKLASRIL	GETIH(1)IPTMENGPK(1)LASR(1)ILSK(1)
P55199	440	0.949238	13.0757	73.168	H	LGLPLLTDCAQPSRPHGSPSRSKPKKKSKKH	LGLPLLTDCAQPSR(0.004)PH(0.949)GSPSR(0.047)
P55735	67	0.988976	19.6292	47.018	H	DLRGHEGPVWQVAWAHPMYGNILASCSYDRK	GH(0.011)EGPVWQVAWAH(0.989)PMYGNILASCSYDR
P56270	301	0.935718	14.1735	107.75	H	KAFRDVYHLNRHKLSHSDEKPYQCPVCQQRF	H(0.002)K(0.027)LSH(0.936)SDEK(0.036)PYQCPVCQQR
P56524	479	0.993424	21.7915	89.803	H	RTQSAPLPQNAQALQHLVIQQQHQQFLEKHK	TQSAPLPQNAQALQH(0.993)LVIQQQHQQFLEK(0.007)
P56589	198	0.999998	56.7503	73.057	H	IKQAVQKVLGSVSLKHSLSLLDLEQKLKEIR	VLGSVSLK(1)H(1)SLSLLDLEQK(0.159)LK(0.841)
P57078	805	0.683149	3.90553	63.158	H	AAQGRHAQTVETLLRHGAHINLQSLKFQGGH	H(0.287)AQTVETLLR(0.992)H(0.683)GAH(0.389)INLQSLK(0.649)
P57682	55	0.999244	28.3502	43.799	H	TPLPEKFFQTPEGLSHGIQMEPVDLTVNKRS	FFQTPEGLSH(0.999)GIQMEPVDLTVNK(0.483)R(0.518)
P58107	2723	1	84.1486	124.07	H	VSFRGLRRQVSASELHTSGILGPETLRDLAQ	QVSASELH(1)TSGILGPETLR
P60228	390	0.599318	1.74857	78.848	H	IRNARLDAKIDSKLGHVVMGNNAVSPYQQVI	LGH(0.599)VVMGNNAVSPYQQVIEK(0.401)
P60660	132	0.999944	43.4183	48.115	H	GEKMTEEEVEMLVAGHEDSNGCINYEAFVRH	MTEEEVEMLVAGH(1)EDSNGCINYEAFVR
P61011	77	0.333333	0	90.793	H	LEEMASGLNKRKMIQHAVFKELVKLVDPGVK	MIQH(0.333)AVFK(0.333)ELVK(0.333)LVDPGVK(1)
P61952	5	1	89.6786	89.679	H	___________MPALHIEDLPEKEKLKMEVE	PALH(1)IEDLPEK(1)
P62081	126	0.797282	5.95712	62.442	H	KNKQKRPRSRTLTAVHDAILEDLVFPSEIVG	SR(0.202)TLTAVH(0.797)DAILEDLVFPSEIVGKR
P62995	200	0.997465	25.9596	93.839	H	DGRRIRVDFSITKRPHTPTPGIYMGRPTYGS	R(0.003)PH(0.997)TPTPGIYMGR
P68104	7	0.840008	6.12943	58.123	H	_________MGKEKTHINIVVIGHVDSGKST	MGK(0.784)EK(0.366)TH(0.84)INIVVIGHVDSGK(0.011)
P78312	969	0.975094	16.2424	65.244	H	NFQAATESVPNSGNIHNGSLEQTEEPETSSH	NFQAATESVPNSGNIH(0.975)NGSLEQTEEPETSSH(0.023)SPSR(0.002)
P78527	2670	0.676837	3.2157	56.986	H	SFDWLTGSSTDPLVDHTSPSSDSLLFAHKRS	SSFDWLTGSSTDPLVDH(0.677)TSPSSDSLLFAHK(0.323)
P84098	143	0.951643	12.9542	84.568	H	KGNVFKNKRILMEHIHKLKADKARKKLLADQ	R(1)ILMEHIH(0.952)K(0.048)
P85037	423	0.999844	38.0608	110.38	H	PFGPLSSRSAPASPTHPGLMSPRSGGLQTPE	SAPASPTH(1)PGLMSPR
P85299	281	0.5	0	116.99	H	HEAEGAAAGGTSIRRHSVSEMTSCPEPQGFS	R(0.5)H(0.5)SVSEMTSCPEPQGFSDPPGQGPTGTFR
P98082	425	0.999942	42.3554	111.3	H	NGVKQDLESSVQSSPHDSIAIIPPPQSTKPG	QDLESSVQSSPH(1)DSIAIIPPPQSTKPGR
P98175	86	0.494221	0	133.23	H	EASPGSETQRRRRRRHRHSPTGPPGFPRDGD	H(0.494)R(0.494)H(0.012)SPTGPPGFPR
P98175	88	0.421895	1.64228	86.463	H	SPGSETQRRRRRRHRHSPTGPPGFPRDGDYR	H(0.289)R(0.289)H(0.422)SPTGPPGFPR
Q00839	282	0.998898	29.6284	95.212	H	SRAKSPQPPVEEEDEHFDDTVVCLDTYNCDL	SPQPPVEEEDEH(0.999)FDDTVVCLDTYNCDLHFK(0.001)
Q01082	804	0.756738	5.86731	45.791	H	VAEEIANYRPTLDTLHEQASALPQEHAESPD	DVAEEIANYR(0.043)PTLDTLH(0.757)EQASALPQEH(0.196)AESPDVR(0.005)
Q01082	814	0.983139	18.3539	59.598	H	TLDTLHEQASALPQEHAESPDVRGRLSGIEE	HKDVAEEIANYRPTLDTLH(0.002)EQASALPQEH(0.983)AESPDVR(0.014)
Q01167	376	1	81.1194	143.84	H	PLGPLSSRSAPASPNHAGVLSAHSSGAQTPE	SAPASPNH(1)AGVLSAHSSGAQTPESLSR
Q01167	383	0.890873	9.91379	45.49	H	RSAPASPNHAGVLSAHSSGAQTPESLSREGS	SAPASPNH(0.16)AGVLSAH(0.891)SSGAQTPESLSR(0.863)EGSPAPLEPEPGAAQPK(0.086)
Q01196	215	0.900772	9.64209	145.31	H	ELEQLRRTAMRVSPHHPAPTPNPRASLNHST	TAMR(0.001)VSPH(0.098)H(0.901)PAPTPNPR
Q01581	485	0.982529	21.1407	88.186	H	PTPNDDTLDEGVGLVHSNIATEHIPSPAKKV	RPTPNDDTLDEGVGLVH(0.983)SNIATEH(0.003)IPSPAK(0.008)K(0.007)
Q01581	492	0.97568	16.2048	129.72	H	LDEGVGLVHSNIATEHIPSPAKKVPRLPATA	RPTPNDDTLDEGVGLVH(0.001)SNIATEH(0.976)IPSPAK(0.023)
Q01974	594	0.997104	25.4979	50.088	H	DDRTVKSALEPPDFVHLVAQIAAGMEYLSSH	SALEPPDFVH(0.997)LVAQIAAGMEYLSSHHVVHK(0.003)
Q02413	42	0.999984	48.7993	96.668	H	IQVRDYNTKNGTIKWHSIRRQKREWIKFAAA	NGTIK(1)WH(1)SIRR
Q02487	115	0.998735	28.9718	75.652	H	NTENQEKKKIFVFLEHQTKVLKKRHTKEKVL	K(0.002)IFVFLEH(0.999)QTK(1)
Q03001	7534	0.707977	4.3821	51.557	H	EIQSVCSDVETVPQTHRPTPRAGSRPSTAKP	RGSDASDFDISEIQSVCSDVETVPQTH(0.708)R(0.258)PTPR(0.034)
Q03188	606	0.794889	6.45021	52.198	H	VQKFLNAEGSGGIVGHDEISRCSLSEPLESD	FLNAEGSGGIVGH(0.795)DEISR(0.18)CSLSEPLESDEADLAK(0.025)
Q05209	584	0.999124	30.5725	69.084	H	TPSPTTQVETPDLVDHDNTSPLFRTPLSFTN	TVSLTPSPTTQVETPDLVDH(0.999)DNTSPLFR(0.001)
Q05209	602	0.579247	2.77549	96.317	H	TSPLFRTPLSFTNPLHSDDSDSDERNSDGAV	TPLSFTNPLH(0.579)SDDSDSDER(0.115)NSDGAVTQNK(0.306)
Q05397	884	0.719711	5.72545	52.824	H	PAAPPKKPPRPGAPGHLGSLASLSSPADSYN	K(0.054)PPR(0.193)PGAPGH(0.72)LGSLASLSSPADSYNEGVK(0.034)
Q05682	253	0.773209	5.31518	98.421	H	PKQEEEREQGSDEISHHEKMEEEDKERAEAE	QEEER(1)EQGSDEISH(0.773)H(0.229)EK(0.998)
Q06418	865	0.999976	46.1992	86.825	H	ILTPGGLAEQPGQAEHQPESPLNETQRLLLL	YILTPGGLAEQPGQAEH(1)QPESPLNETQR
Q07157	279	0.940536	14.0097	54.647	H	ERATLLNVPDLSDSIHSANASERDDISEIQS	ATLLNVPDLSDSIH(0.941)SANASER(0.754)DDISEIQSLASDH(0.153)SGR(0.153)
Q07157	1110	0.999996	54.0359	114.58	H	DDKQPYPSRPPFDNQHSQDLDSRQHPEESSE	QPYPSRPPFDNQH(1)SQDLDSR
Q07157	1374	0.420059	2.06554	65.898	H	LSYFDRRSFENKPPAHIAASHLSEPAKPAHS	SFENK(0.188)PPAH(0.42)IAASH(0.118)LSEPAK(0.261)PAH(0.011)SQNQSNFSSYSSK(0.003)
Q07157	889	0.777333	5.64782	58.712	H	ITRSSEPVREDSSGMHHENQTYPPYSPQAQP	SSEPVR(0.011)EDSSGMH(0.777)H(0.212)ENQTYPPYSPQAQPQPIHR
Q07157	890	0.690395	6.03825	42.709	H	TRSSEPVREDSSGMHHENQTYPPYSPQAQPQ	SSEPVR(0.172)EDSSGMH(0.076)H(0.69)ENQTYPPYSPQAQPQPIH(0.03)R(0.032)
Q07343	127	0.999535	33.3216	54.235	H	ASSSAGLVLHATFPGHSQRRESFLYRSDSDY	SPLDPQASSSAGLVLH(0.001)ATFPGH(1)SQR(1)R(1)
Q08AD1	968	0.733011	4.57867	50.723	H	SSAIAPFSSDSPRPTHPSPQSSNRKSASFSV	QAGLSSAIAPFSSDSPR(0.255)PTH(0.733)PSPQSSNR(0.012)
Q09472	2324	0.876172	8.82267	86.179	H	SPQPVPSPRPQSQPPHSSPSPRMQPQPSPHH	SPQPVPSPR(0.009)PQSQPPH(0.876)SSPSPR(0.115)
Q09666	4513	0.496997	1.18242	70.315	H	PEGKLKGPKFKMPDVHFKSPQISMSDIDLNL	FK(0.099)MPDVH(0.497)FK(0.379)SPQISMSDIDLNLK(0.025)
Q09666	5835	0.963355	16.2567	113.08	H	LKFGTFGGLGSKSKGHYEVTGSDDETGKLQG	GH(0.963)YEVTGSDDETGK(0.023)LQGSGVSLASK(0.014)
Q09666	5778	0.943321	13.0185	80.415	H	SPKGKFSLFKSKKPRHRSNSFSDEREFSGPS	H(0.943)R(0.943)SNSFSDER(0.101)EFSGPSTPTGTLEFEGGEVSLEGGK(0.013)
Q09666	4957	0.63179	2.34478	61.222	H	VDLKGPKVEAPSLDVHMDSPDINIEGPDVKI	VEAPSLDVH(0.632)MDSPDINIEGPDVK(0.368)
Q0P651	79	0.891751	9.32363	41.247	H	SDCKILDGHFVSPMAHYVPDIMPIESVIARF	ILDGH(0.104)FVSPMAH(0.892)YVPDIMPIESVIAR(0.002)FQFIVPK(0.002)
Q12770	1072	0.367913	1.50156	43.416	H	SPVYSSSDTVACHLTHTVPCAHQKPITALKA	GSSPASPVYSSSDTVACH(0.26)LTH(0.368)TVPCAH(0.003)QK(0.206)PITALK(0.162)
Q12774	1170	0.999965	44.5002	104.59	H	EIPVVRNSTVLLSMTHEDQKLQEVKFELIVS	NSTVLLSMTH(1)EDQK(1)LQEVK
Q12789	2024	0.999868	38.8227	69.398	H	HIMTRPGIPESSLLRHYQGVLQPVAVLELLQ	H(1)YQGVLQPVAVLELLQGLESLGCIRKR
Q12857	369	0.99943	32.7329	109.45	H	ITGPRASPHATPSTLHFPTSPIIQQPGPYFS	ASPH(0.001)ATPSTLH(0.999)FPTSPIIQQPGPYFSHPAIR
Q12857	311	0.964905	17.0589	94.359	H	GQGRSPGSGSQSSGWHEVEPGMPSPTTLKKS	SPGSGSQSSGWH(0.965)EVEPGMPSPTTLK(0.019)K(0.016)
Q12888	1064	0.927846	13.9053	97.776	H	RSEDPPTTPIRGNLLHFPSSQGEEEKEKLEG	GNLLH(0.928)FPSSQGEEEK(0.038)EK(0.034)LEGDHTIR
Q12888	1218	0.999994	54.224	98.258	H	GEKPVSAPGDDTESLHSQGEEEFDMPQPPHG	GSGEK(1)PVSAPGDDTESLH(1)SQGEEEFDMPQPPHGHVLHR
Q12906	779	0.764367	5.31394	61.525	H	YSNYGPPQGKQKGYNHGQGSYSYSNSYNSPG	QK(0.225)GYNH(0.764)GQGSYSYSNSYNSPGGGGGSDYNYESK(0.011)
Q12906	752	0.688656	3.96591	46.618	H	HGGQQKPSYGSGYQSHQGQQQSYNQSPYSNY	QPH(0.014)GGQQK(0.276)PSYGSGYQSH(0.689)QGQQQSYNQSPYSNYGPPQGK(0.021)
Q12929	486	0.99645	25.0306	86.519	H	EIKRLSTEHSSVSEYHPADGYAFSSNIYTRG	RLSTEH(0.003)SSVSEYH(0.996)PADGYAFSSNIYTR
Q12959	614	0.999929	41.4719	72.583	H	GLPSQGLNFKFGDILHVINASDDEWWQARQV	FGDILH(1)VINASDDEWWQAR
Q12959	120	0.998976	29.905	66.98	H	VEKYRYQDEDTPPQEHISPQITNEVIGPELV	YQDEDTPPQEH(0.999)ISPQITNEVIGPELVHVSEK(0.001)
Q13085	1271	0.983743	17.8187	81.967	H	FSDSPPQSPTFPEAGHTSLYDEDKVPRDEPI	IFDEVMGCFSDSPPQSPTFPEAGH(0.984)TSLYDEDK(0.016)VPR
Q13111	769	0.766619	4.56006	54.596	H	IREFQEHCRRGLLSNHTGSPRSPSTTYLHTP	GLLSNH(0.767)TGSPR(0.816)SPSTTYLH(0.37)TPTPSEDAAIPSK(0.048)
Q13129	37	0.499514	0	57.278	H	AGAGDGVETESMVRGHRPVSPAPGASGLRPC	GH(0.5)R(0.5)PVSPAPGASGLR(0.001)PCLWQLETELR
Q13242	213	1	69.5019	109.44	H	GSRGRDSPYQSRGSPHYFSPFRPY_______	GSPH(1)YFSPFRPY
Q13309	61	0.958777	14.5907	73.113	H	PDSENIPQELLSNLGHPESPPRKRLKSKGSD	TSELLSGMGVSALEK(0.008)EEPDSENIPQELLSNLGH(0.959)PESPPR(0.033)
Q13490	145	0.965737	14.5004	81.735	H	PMRNSFAHSLSPTLEHSSLFSGSYSSLSPNP	NSFAH(0.034)SLSPTLEH(0.966)SSLFSGSYSSLSPNPLNSR
Q13492	351	0.708593	3.86034	71.423	H	KALKEQRLKELAKKPHTSLTTAASPVSTSAG	K(0.291)PH(0.709)TSLTTAASPVSTSAGGIMTAPAIDIFSTPSSSNSTSK
Q13501	174	1	81.5553	96.334	H	LHRGHTKLAFPSPFGHLSEGFSHSRWLRKVK	LAFPSPFGH(1)LSEGFSHSR
Q13506	171	0.525755	0.447812	146.27	H	GESRLWQGHHATESEHSLSPADLGSPASPKE	LWQGHHATESEH(0.526)SLSPADLGSPASPK(0.474)
Q13535	830	1	73.9837	73.984	H	DPDKDVRVAFSGNIKHILESLDSEDGFIKEL	VAFSGNIK(1)H(1)ILESLDSEDGFIK(1)
Q13595	201	1	109.456	156.35	H	DGRRIRVDYSITKRAHTPTPGIYMGRPTHSG	AH(1)TPTPGIYMGR
Q13595	214	0.966493	15.1141	73.107	H	RAHTPTPGIYMGRPTHSGGGGGGGGGGGGGG	R(0.005)AH(0.072)TPTPGIYMGR(0.927)PTH(0.966)SGGGGGGGGGGGGGGGGR(0.03)
Q13627	541	0.830051	6.88786	90.765	H	RARSDPTHQHRHSGGHFTAAVQAMDCETHSP	H(0.17)SGGH(0.83)FTAAVQAMDCETHSPQVR
Q13627	554	0.973966	17.4217	57.414	H	GGHFTAAVQAMDCETHSPQVRQQFPAPLGWS	H(0.002)SGGH(0.006)FTAAVQAMDCETH(0.974)SPQVR(0.018)
Q14004	522	0.678842	5.02175	108.32	H	SQTNHVKDVKKIKIEHAPSPSSGGTLKNDKA	IK(0.071)IEH(0.679)APSPSSGGTLK(0.214)NDK(0.037)
Q14135	278	0.963401	16.6605	51.684	H	PESASRRGQPASPSAHMVSHSHSPSVVS___	R(0.023)GQPASPSAH(0.963)MVSH(0.781)SH(0.233)SPSVVS
Q14135	282	0.959755	13.5906	85.457	H	SRRGQPASPSAHMVSHSHSPSVVS_______	RGQPASPSAH(0.08)MVSH(0.96)SH(0.96)SPSVVS
Q14135	284	0.959755	13.5906	55.763	H	RGQPASPSAHMVSHSHSPSVVS_________	RGQPASPSAH(0.08)MVSH(0.96)SH(0.96)SPSVVS
Q14149	768	0.999998	56.0239	98.804	H	VFLLESINGKSESPDHMVSQYQQALEEIERL	SESPDH(1)MVSQYQQALEEIER
Q14181	143	1	122.292	158.31	H	PETPLTKRSVSTRSPHQLLSPSSFSPSATPS	SPH(1)QLLSPSSFSPSATPSQK(1)
Q14244	167	0.99962	36.2005	62.438	H	KPKQKHNRWSWGGSLHGSPSIHSADPDRRSV	WSWGGSLH(1)GSPSIHSADPDRR
Q14315	2601	0.889337	9.83015	109.28	H	SPFKAKVTGPRLSGGHSLHETSTVLVETVTK	LSGGH(0.889)SLH(0.018)ETSTVLVETVTK(0.092)
Q14449	417	1	89.9105	97.271	H	EGLAWRKKGCLRLGTHGSPTASSQSSATNMA	LGTH(1)GSPTASSQSSATNMAIHR
Q14517	4281	0.999011	30.045	126.42	H	NNLDRNSFEGSAIPEHPEFSTFNPESVHGHR	NNLDR(0.001)NSFEGSAIPEH(0.999)PEFSTFNPESVHGHR
Q14558	214	0.676923	3.49965	66.772	H	HGEAQCTELDMDDGRHSPPMVKNATVHPGLE	LGLAVIHGEAQCTELDMDDGR(0.308)H(0.677)SPPMVK(0.015)
Q14596	942	0.999985	48.103	50.426	H	MGFCDRQLNLRLLKKHNYNILQVVTELLQLN	LLK(1)K(1)H(1)NYNILQVVTELLQLNNNDWYSQR
Q14596	594	0.977856	16.5248	49.356	H	HNTPVDVTPCMSPLPHDSPLIEKPGLGQIEE	VPH(0.251)NTPVDVTPCMSPLPH(0.978)DSPLIEK(0.76)PGLGQIEEENEGAGFK(0.011)
Q14671	117	0.993736	22.0148	107.46	H	GYNNSKHRWPTGDNIHAEHQVRSMDELNHDF	HRWPTGDNIH(0.994)AEH(0.006)QVR
Q14676	790	1	74.7495	126.43	H	YGPCLSPPRAIPGDQHPESPVHTEPMGIQGR	AIPGDQH(1)PESPVHTEPMGIQGR
Q14676	771	1	135.703	220.32	H	CLRESEDSETQPFDTHLEAYGPCLSPPRAIP	ESEDSETQPFDTH(1)LEAYGPCLSPPR
Q14677	292	0.929406	11.2141	115.06	H	RTANPSKTIDLGAAAHYTGDKASPDQNASTH	TIDLGAAAH(0.929)YTGDK(0.07)ASPDQNASTHTPQSSVK
Q14678	241	1	103	120.23	H	APAAPTTSSMGSSIRHSPLSSGISTPVTNVS	H(1)SPLSSGISTPVTNVSPMHLQHIR
Q14689	97	0.935264	11.5979	110.25	H	SRPTASRDERFRSDVHTEAVQAALAKYKERK	FR(0.065)SDVH(0.935)TEAVQAALAK
Q14694	4	1	84.1201	89.297	H	____________MALHSPQYIFGDFSPDEFN	ALH(1)SPQYIFGDFSPDEFNQFFVTPR
Q14774	120	0.393436	0	54.3	H	PAGFPQRLSPLSAAYHHHHPQQQQQQQQPQQ	LSPLSAAYH(0.393)H(0.393)H(0.107)H(0.107)PQQQQQQQQPQQQQPPPPPR
Q14774	121	0.393436	0	54.3	H	AGFPQRLSPLSAAYHHHHPQQQQQQQQPQQQ	LSPLSAAYH(0.393)H(0.393)H(0.107)H(0.107)PQQQQQQQQPQQQQPPPPPR
Q14839	369	0.989773	22.1879	77.464	H	KGEEEVTAVDGYETDHQDYCEVCQQGGEIIL	K(0.006)K(0.004)GEEEVTAVDGYETDH(0.99)QDYCEVCQQGGEIILCDTCPR
Q14938	386	0.975606	17.7868	64.962	H	FPSTSIIQQSSPYFTHPTIRYHHHHGQDSLK	ATASALH(0.016)FPSTSIIQQSSPYFTH(0.976)PTIR(0.008)
Q14938	13	0.999987	50.6625	61.136	H	___MYSPYCLTQDEFHPFIEALLPHVRAFSY	MYSPYCLTQDEFH(1)PFIEALLPHVR
Q14999	35	0.794325	5.86498	65.232	H	AYPDELIRQRVGHDGHPEYQIRWLILRRGDE	VGH(0.206)DGH(0.794)PEYQIR(0.999)WLILR(1)
Q14C86	945	0.971307	15.3882	73.519	H	PPAAAIGATSLVAAPHSSSSSPSKDSSRGET	ELPPAAAIGATSLVAAPH(0.971)SSSSSPSK(0.028)DSSR(0.001)
Q15058	1204	0.978766	17.0909	77.633	H	RSRSLMKNRRISGCLHDIQVHPIKNLHSSHS	R(0.002)ISGCLH(0.979)DIQVHPIK(0.019)
Q15154	563	0.999999	61.9092	80.277	H	IRNPQVASTWNEVNSHSNAQCVSNNRDGRTV	NPQVASTWNEVNSH(1)SNAQCVSNNR
Q15365	228	0.990156	20.0262	100.38	H	DLEGPPLDAYSIQGQHTISPLDLAKLNQVAR	CSDAAGYPHATHDLEGPPLDAYSIQGQH(0.99)TISPLDLAK(0.01)
Q15365	252	0.99388	22.1057	112.02	H	KLNQVARQQSHFAMMHGGTGFAGIDSSSPEV	QQSHFAMMH(0.994)GGTGFAGIDSSSPEVK(0.006)
Q15366	260	0.932336	11.5556	56.783	H	KLHQLAMQQSHFPMTHGNTGFSGIESSSPEV	LHQLAMQQSH(0.002)FPMTH(0.932)GNTGFSGIESSSPEVK(0.065)
Q15386	362	0.89331	9.22906	64.273	H	TFLSQLPVSPASASCHDSASDSEEESEEADK	VLQTFLSQLPVSPASASCH(0.893)DSASDSEEESEEADK(0.107)PSSPEDGR
Q15468	391	0.748256	4.77352	49.485	H	IKRSSQKLSSGKMPIHDHDSGVEDEDFSPRP	MPIH(0.748)DH(0.249)DSGVEDEDFSPR(0.001)PIPSPH(0.001)PVSQK
Q15545	268	0.72285	4.16509	94.301	H	LERQLQDKLNESDEQHQENEGTNQLVMGIQK	QLQDK(0.277)LNESDEQH(0.723)QENEGTNQLVMGIQK
Q15562	257	0.998866	29.4602	102.45	H	AVDSYQRHLFVHISQHCPSPGAPPLESVDVR	HLFVH(0.001)ISQH(0.999)CPSPGAPPLESVDVR
Q15645	22	0.99998	49.4897	74.726	H	DLKQALPCVAESPTVHVEVHQRGSSTAKKED	QALPCVAESPTVH(1)VEVHQR
Q15648	1024	0.785326	5.26711	52.927	H	PPKRKKADTEGKSPSHSSSNRPFTPPTSTGG	SPSH(0.785)SSSNR(0.936)PFTPPTSTGGSK(0.278)SPGSAGR
Q15652	2010	0.929482	11.1994	62.589	H	GTDNKLTPPESQSPLHWLADLAEQKAREEKK	LTPPESQSPLH(0.929)WLADLAEQK(0.071)
Q15940	8	0.999554	34.6653	87.754	H	________MLSHKTQHKSIYTREKSYKCKKC	MLSHKTQH(1)K
Q15942	298	1	132.406	222.88	H	GAPGGSGSQPNQKLGHPEALSAGTGSPQPPS	LGH(1)PEALSAGTGSPQPPSFTYAQQR
Q16204	375	0.999989	49.7349	56.766	H	PSSSRPISPGLSYASHTVGFTPPTSLTRAGM	PISPGLSYASH(1)TVGFTPPTSLTR
Q16513	106	1	79.2783	160.46	H	KKLEELHHKLQELNAHIVVSDPEDITDCPRT	LQELNAH(1)IVVSDPEDITDCPR
Q16543	9	0.999984	47.8814	107.34	H	_______MVDYSVWDHIEVSDDEDETHPNID	VDYSVWDH(1)IEVSDDEDETHPNIDTASLFR
Q16543	20	0.976872	16.264	83.236	H	SVWDHIEVSDDEDETHPNIDTASLFRWRHQA	MVDYSVWDH(0.023)IEVSDDEDETH(0.977)PNIDTASLFR
Q16576	96	0.34952	0	50.413	H	ARVHIPNDDAQFDASHCDSDKGEFGGFGSVT	VH(0.258)IPNDDAQFDASH(0.35)CDSDK(0.35)GEFGGFGSVTGK(0.043)
Q16643	316	0.877255	12.017	71.651	H	ASASAGSCDVPSPFNHRPGSHLDSHRRMAPT	VASASAGSCDVPSPFNH(0.877)R(0.041)PGSH(0.055)LDSH(0.02)R(0.006)
Q16643	321	0.920262	12.9341	93.388	H	GSCDVPSPFNHRPGSHLDSHRRMAPTPIPTR	VASASAGSCDVPSPFNH(0.032)R(0.047)PGSH(0.92)LDSH(0.001)R
Q16649	198	0.903454	10.3793	57.427	H	PQSSLSDVSEVSSVEHTQESSVQGSCRSPEN	H(0.001)SPQSSLSDVSEVSSVEH(0.903)TQESSVQGSCR(0.013)SPENK(0.083)
Q16706	308	0.986292	18.5658	57.348	H	HSPTMAYLLNRAGLSHMLIQRVHYAVKKHFA	AGLSH(0.986)MLIQR(0.015)VH(0.999)YAVK(1)
Q16706	315	0.999445	32.4954	57.348	H	LLNRAGLSHMLIQRVHYAVKKHFALHKTLEF	AGLSH(0.986)MLIQR(0.015)VH(0.999)YAVK(1)
Q16763	11	0.999377	32.0492	83.998	H	_____MNSNVENLPPHIIRLVYKEVTTLTAD	NSNVENLPPH(0.999)IIR(0.001)
Q17RY0	257	0.614359	2.0227	62.68	H	HHSQHQQQRRSPASPHPPPFTHRNAAFNQLP	R(0.386)SPASPH(0.614)PPPFTHR
Q27J81	1157	0.967197	14.696	129.01	H	QAEADSTSEGLEDAVHSRGARPPAAGPGGDE	DPTSLLGVLQAEADSTSEGLEDAVH(0.967)SR(0.033)
Q27J81	580	0.939054	11.8774	52.707	H	KKLNWQKLPSNVAREHNSMWASLSSPDAEAV	EH(0.939)NSMWASLSSPDAEAVEPDFSSIER(0.061)
Q2KHM9	179	0.997874	26.954	57.058	H	VEISSSGAKVYLYSSHPGQSDLTVPNSPPTH	VYLYSSH(0.998)PGQSDLTVPNSPPTH(0.002)DPGLQPHPR
Q2M3G4	406	0.999591	33.8807	139.63	H	LEEAPLVRMRSPPDPHASQGPPASVHASDQP	MRSPPDPH(1)ASQGPPASVHASDQPYGTGLGQR
Q2TAM9	176	0.998207	28.7037	92.247	H	LEKLEAMYRRALLQLHLEQRGPRPSGDKEEQ	ALLQLH(0.998)LEQR(0.002)GPRPSGDK(1)
Q49A88	95	0.998003	26.998	62.57	H	LRKIPRFNADSGYSIHSDSESQAETVHGLDG	FNADSGYSIH(0.998)SDSESQAETVH(0.002)GLDGCASLLR
Q4AC94	539	1	64.2492	64.249	H	TMTLSVDRLALLGRTHSVRIIIETMGVPPDS	TH(1)SVR(1)IIIETMGVPPDSPQMTPGK(1)
Q52LW3	485	0.954943	13.2622	84.249	H	TNSTEEEKVDGNVNKHLNSSQPSGFGPANSL	H(0.955)LNSSQPSGFGPANSLEDVVR(0.045)
Q53ET0	66	0.998074	27.6323	41.375	H	RLQAQKLRLAYTRSSHYGGSLPNVNQIGSGL	SSH(0.998)YGGSLPNVNQIGSGLAEFQSPLH(0.002)SPLDSSR
Q53H80	116	0.995344	20.5071	122.74	H	SFQQTDPCCTSDAQPHAFLLSGPASPGTSSA	HLETSFQQTDPCCTSDAQPH(0.995)AFLLSGPASPGTSSAASSPLK(0.527)K(0.477)
Q53HC0	288	0.329172	0	67.418	H	SGEQHSPAREKPHKAHVGVAHRIHHATPPQA	AH(0.329)VGVAH(0.329)R(0.352)IH(0.146)H(0.893)ATPPQAQPEVK(0.95)
Q53HC0	293	0.329172	0	67.418	H	SPAREKPHKAHVGVAHRIHHATPPQAQPEVK	AH(0.329)VGVAH(0.329)R(0.352)IH(0.146)H(0.893)ATPPQAQPEVK(0.95)
Q53HC0	297	0.893415	12.4532	67.418	H	EKPHKAHVGVAHRIHHATPPQAQPEVKTLAV	AH(0.329)VGVAH(0.329)R(0.352)IH(0.146)H(0.893)ATPPQAQPEVK(0.95)
Q5H9R7	522	0.484325	0.00797049	128.73	H	TNKRNTVDLVTTCHIHSSSDDEIDFKETGFS	NTVDLVTTCH(0.032)IH(0.484)SSSDDEIDFK(0.483)
Q5JSZ5	216	1	135.646	187.62	H	LRPQNVTSWREGGGRHIISATSLSTSPTELG	H(1)IISATSLSTSPTELGSR
Q5JSZ5	1488	0.999852	38.2978	84.878	H	EALPGGLSGCSSGSGHSPYALERAAHASADL	SPDEALPGGLSGCSSGSGH(1)SPYALER
Q5JTV8	134	0.999998	56.3766	190.35	H	TEEMKTRRTTRLQQQHSEQPPLQPSPVMTRR	LQQQH(1)SEQPPLQPSPVMTR
Q5PRF9	267	1	150.19	164.28	H	SPEELGARAAFTTPDHAPLSPQSSVASSGSE	AAFTTPDH(1)APLSPQSSVASSGSEQTEEQGSSR
Q5PRF9	229	0.78257	7.34821	50.645	H	NSIGSNANTGLPCQIHPSPLKRSMSLIPTSP	ENGH(0.005)VPFH(0.047)PSSSVPPAINSIGSNANTGLPCQIH(0.783)PSPLK(0.144)R(0.021)
Q5QJ38	769	0.97323	15.6191	71.279	H	LAGEGGDQKSPAKKEHNSSVPWSSLEKQMQR	K(0.027)EH(0.973)NSSVPWSSLEK(0.001)QMQR(0.999)
Q5QJE6	179	1	96.006	106.81	H	RRSKAKSLTDPSQESHTEAISDAETSSSDIS	SLTDPSQESH(1)TEAISDAETSSSDISFSGIATR
Q5SW79	1033	0.984821	19.1015	98.144	H	PSVDLTDDDQTSSVPHSAISDIMSSDQETYS	IR(0.003)QPSVDLTDDDQTSSVPH(0.985)SAISDIMSSDQETYSCK(0.012)PHGR
Q5SW79	1527	0.90735	9.90931	80.67	H	MLPSPPKQKSSPVNNHHSPGQTPTLGQPEAR	SSPVNNH(0.907)H(0.093)SPGQTPTLGQPEAR
Q5SW79	1528	0.5	0	64.538	H	LPSPPKQKSSPVNNHHSPGQTPTLGQPEARA	SSPVNNH(0.5)H(0.5)SPGQTPTLGQPEAR
Q5T089	401	0.57087	1.23949	96.64	H	DSLHKKAGGRSRGGLHPRGTPPTAQEPPGGS	AGGRSRGGLH(0.571)PR(0.429)
Q5T0B9	393	0.999009	30.0334	205.52	H	RAYTSETYLMKHMSKHTVVEHLVSHHSPQRT	H(0.999)TVVEH(0.001)LVSHHSPQR
Q5T0B9	398	0.999975	47.2952	148.62	H	ETYLMKHMSKHTVVEHLVSHHSPQRTESPGI	HTVVEH(1)LVSHHSPQR
Q5T0B9	402	0.644805	0	108.13	H	MKHMSKHTVVEHLVSHHSPQRTESPGIPVRI	HTVVEH(0.01)LVSH(0.645)H(0.645)SPQR(0.698)TESPGIPVR(0.002)
Q5T0B9	403	0.644805	0	108.13	H	KHMSKHTVVEHLVSHHSPQRTESPGIPVRIS	HTVVEH(0.01)LVSH(0.645)H(0.645)SPQR(0.698)TESPGIPVR(0.002)
Q5T0N5	487	0.440759	0	75.02	H	LSEVEGKTGGRGDRRHSSDINHLVTQGRESP	R(0.441)H(0.441)SSDINH(0.118)LVTQGR
Q5T0W9	387	0.5	0	69.024	H	IRQFQPNQINENWKRHSYAGEQPETVPYLLL	R(0.5)H(0.5)SYAGEQPETVPYLLLNR
Q5T1V6	73	0.999502	33.0245	74.278	H	ESCPFPSPGGQLAEVHSVSPEQGAKDSHPSE	H(0.001)ISESCPFPSPGGQLAEVH(1)SVSPEQGAK(1)
Q5T481	648	0.999737	35.8	104.88	H	PRSRSPVSRSLSPRSHTPSFTSCSSSHSPPG	SH(1)TPSFTSCSSSHSPPGPSR
Q5T5P2	308	0.888286	9.87541	48.096	H	DGPGAPRPGSTAHPPHAIPNSPPSTPVPHSM	GDGPGAPR(0.013)PGSTAH(0.091)PPH(0.888)AIPNSPPSTPVPH(0.007)SMPPSPSR
Q5T5Y3	1074	1	87.4609	150.09	H	GSKNNSQDHKVKAPVHFVEPLSPTGVAGHRK	APVH(1)FVEPLSPTGVAGHR
Q5T5Y3	866	0.572272	1.29261	125.16	H	PLTTWRQKREQSPSQHGKDPASLLASELVQL	EQSPSQH(0.572)GK(0.425)DPASLLASELVQLHMQLEEK(0.003)
Q5T5Y3	750	0.999881	41.8742	53.259	H	RQDSDSDVVDIEEAEHDFMGEAHPVVFSRYI	QDSDSDVVDIEEAEH(1)DFMGEAHPVVFSR
Q5T5Y3	479	0.964566	14.6338	60.48	H	KKTRPASQPTPFALHHAASCEVDPSSGDSIS	TR(0.002)PASQPTPFALH(0.033)H(0.965)AASCEVDPSSGDSISLAR
Q5TDH0	119	1	89.3351	100.59	H	TSSPRQRQPPGTQQSHSSPGEITSSPQGLDN	QPPGTQQSH(1)SSPGEITSSPQGLDNPALLR
Q5TGY3	647	0.999951	43.0922	91.337	H	CSPPRCWTPSEPESVHQAPDTQSISHFLHRV	CWTPSEPESVH(1)QAPDTQSISHFLHR
Q5TGY3	961	0.999039	32.8344	55.336	H	KLVPPPSAMARSPTTHPPANTYLPQYGGYGA	SPTTH(0.999)PPANTYLPQYGGYGAGQSVFAPTK(0.001)PFTGQDCANSK
Q5THJ4	1728	1	75.7181	81.992	H	VSNVEYPDMPRSLPSHMEEAPNVFQLYQRPT	SLPSH(1)MEEAPNVFQLYQR
Q5VT52	944	0.518167	0	43.636	H	PSPSKNDSFFTPDSNHNSLSQSTTGHLSLPQ	GNEPGSDR(0.511)SPSPSK(0.958)NDSFFTPDSNH(0.518)NSLSQSTTGH(0.002)LSLPQK(0.011)
Q5VT52	1192	0.499667	0	52.898	H	SVGSFRSNSFNSTFEHHLPPSPLEHGTPFQR	SNSFNSTFEH(0.5)H(0.5)LPPSPLEH(0.001)GTPFQR
Q5VT52	1193	0.499667	0	52.898	H	VGSFRSNSFNSTFEHHLPPSPLEHGTPFQRE	SNSFNSTFEH(0.5)H(0.5)LPPSPLEH(0.001)GTPFQR
Q5VTL8	16	0.989223	22.5748	65.253	H	MANNSPALTGNSQPQHQAAAAAAQQQQQCGG	ANNSPALTGNSQPQH(0.989)QAAAAAAQQQQQCGGGGATK(0.005)PAVSGK(0.005)
Q5VWN6	1947	0.499885	0	42.253	H	KELKDTMRTSHGLRRHPSFSANCGLPSSWTS	R(0.5)H(0.5)PSFSANCGLPSSWTSTWQVADDLTQNTLDLEYLR
Q5VWN6	1023	0.999964	44.6183	87.447	H	AAVQTKTGTLQDLIQHGSPINNECHPSLERK	TGTLQDLIQH(1)GSPINNECHPSLER
Q5VZ89	964	0.968512	14.5605	129.62	H	MQTEEVCDASAIVAKHSQPSPEPHSPTEPPA	H(0.969)SQPSPEPH(0.1)SPTEPPAWGSSIVK(0.931)
Q5VZ89	972	0.999109	30.3528	130.05	H	ASAIVAKHSQPSPEPHSPTEPPAWGSSIVKV	H(0.034)SQPSPEPH(0.999)SPTEPPAWGSSIVK(0.967)
Q5VZ89	1639	0.966873	12.8607	56.547	H	VPNSLSKRNVSLTRSHSVGGPLQNIDFTQRP	SH(0.967)SVGGPLQNIDFTQR(0.49)PFH(0.49)GISTVSLPNSLQEVVDPLGK(0.054)
Q5VZ89	1656	0.489623	0	56.547	H	VGGPLQNIDFTQRPFHGISTVSLPNSLQEVV	SH(0.967)SVGGPLQNIDFTQR(0.49)PFH(0.49)GISTVSLPNSLQEVVDPLGK(0.054)
Q5VZ89	1335	0.999537	33.3467	66.977	H	KERSTSLSALVRSSPHGSLGSVVNSLSGLKL	SSPH(1)GSLGSVVNSLSGLK
Q5VZK9	861	0.758264	0.558007	51.31	H	SDRIVDEILDALSHCHHKLADHFSRRGKTLP	LTVASFLSDRIVDEILDALSH(0.725)CH(0.758)H(0.758)K(0.758)
Q5VZK9	862	0.758264	0.558007	51.31	H	DRIVDEILDALSHCHHKLADHFSRRGKTLPQ	LTVASFLSDRIVDEILDALSH(0.725)CH(0.758)H(0.758)K(0.758)
Q5VZL5	211	0.999465	32.7195	103.71	H	SSFFDKAANQVEETLHTHLPQTPETNFRDSS	AANQVEETLH(0.999)TH(0.001)LPQTPETNFR
Q63HQ0	138	1	67.7161	69.981	H	RKLLEQERQRIVQQYHPSNNGEYQSSGPEDD	IVQQYH(1)PSNNGEYQSSGPEDDFESCLR
Q63HR2	462	0.934838	11.5675	72.99	H	TEPAVRWDSYENFNQHHEDSVDGSLTHTRGP	WDSYENFNQH(0.935)H(0.065)EDSVDGSLTHTR
Q66K74	733	1	113.272	121.45	H	SLPLRGPRARRSASPHDVDLCLVSPCEFEHR	SASPH(1)DVDLCLVSPCEFEHR
Q66K89	58	0.75742	4.94482	80.245	H	LGLPAPFSEEDEDDVHRCGRCQAEFTALEDF	EAGEGAVAAVAAALAPSGFLGLPAPFSEEDEDDVH(0.757)R(0.243)
Q676U5	73	0.876429	11.5241	85.798	H	AEKHDVPNRHEISPGHDGTWNDNQLQEMAQL	HDVPNR(0.062)H(0.062)EISPGH(0.876)DGTWNDNQLQEMAQLR
Q68CJ6	761	0.795699	5.95341	117.01	H	ELADVGSEYKEMEKLHRSLREVAENARLRKG	EMEKLH(0.796)R(0.202)SLR(0.002)
Q68CP9	693	0.834097	8.05267	63.674	H	AQTVSRIPQNPSPHTHQQQNAPVTVIQSKAP	IPQNPSPH(0.131)TH(0.834)QQQNAPVTVIQSK(0.035)
Q68CZ2	862	0.997281	25.6456	64.89	H	FPVSPETPYVKTALRHPPFSPPEPPLSSPAS	H(0.997)PPFSPPEPPLSSPASQHK(0.003)
Q68CZ2	382	0.999458	32.6593	93.177	H	IPGGPQAIPATNSPDHSDHTLSVSSDSGHST	SSSDPGIPGGPQAIPATNSPDH(0.999)SDH(0.001)TLSVSSDSGHSTASAR
Q68D10	316	0.923265	13.248	90.758	H	REGHDKPVFNGAGKPHSSTSSPSVPKTSASR	EGHDK(0.005)PVFNGAGK(0.044)PH(0.923)SSTSSPSVPK(0.028)
Q68DK7	361	0.998397	29.0135	147.37	H	KLAPEFSKVKTKTPKHSPIKEEPCGSLSETV	H(0.998)SPIKEEPCGSLSETVCK(0.001)R
Q68EM7	611	0.976028	16.0982	118	H	QIASGQNQPQAAAGSHQLSMGQPHNAAGPSP	NNSQIASGQNQPQAAAGSH(0.976)QLSMGQPH(0.024)NAAGPSPHTLR
Q68EM7	619	0.987666	19.5304	77.464	H	PQAAAGSHQLSMGQPHNAAGPSPHTLRRAVK	NNSQIASGQNQPQAAAGSH(0.011)QLSMGQPH(0.988)NAAGPSPH(0.001)TLR
Q68EM7	681	1	49.2649	127.54	H	LSPKPPTRSPSPPTQHTGQPPGQPSAPSQLS	SPSPPTQH(1)TGQPPGQPSAPSQLSAPR(1)
Q69YN4	134	0.921624	10.7038	154.56	H	CLTLAIYGSVDRVISHDRDSPPPPPPPPPPP	VISH(0.922)DR(0.078)DSPPPPPPPPPPPQPQPSLKR
Q6AI39	678	0.999823	37.5154	98.882	H	TAQPQQEKVVGSSPGHPAVQVESHSGGQKRP	VVGSSPGH(1)PAVQVESHSGGQK
Q6AW86	447	0.999652	34.6486	96.067	H	RSFSRSSNLTQHQLLHTGERPFRCVDCGKGF	SFSR(0.99)SSNLTQH(0.01)QLLH(1)TGER
Q6GYQ0	771	1	116.767	132.15	H	DIDDAQILPRSTRVRHFSQSEETGNEVFGAL	H(1)FSQSEETGNEVFGALNEEQPLPR
Q6IQ49	276	1	109.873	126.25	H	KFPSGSQRARVVNTDHGSPEQLQIPVTDSGR	VVNTDH(1)GSPEQLQIPVTDSGR
Q6KC79	134	0.99996	43.999	86.617	H	SGMMMSQYKLSQNSMHSSPASSNYQQTTISH	LSQNSMH(1)SSPASSNYQQTTISH(0.999)SPSSR(0.001)
Q6KC79	149	0.99889	29.5433	49.485	H	HSSPASSNYQQTTISHSPSSRFVPPQTSSGN	LSQNSMH(1)SSPASSNYQQTTISH(0.999)SPSSR(0.001)
Q6N043	109	0.673213	4.11451	57.328	H	TNPTSNPVPASPINFHPESRSSDSSVIVQPF	GITAAFK(0.02)PTSQH(0.261)YTNPTSNPVPASPINFH(0.673)PESR(0.046)
Q6NTF9	260	0.418544	0	67.913	H	RKLNPVPGSYPTQSCHPHLSPSHPVSQTQHA	K(0.036)LNPVPGSYPTQSCH(0.419)PH(0.419)LSPSH(0.126)PVSQTQHASGQK
Q6NTF9	262	0.536721	4.51506	67.913	H	LNPVPGSYPTQSCHPHLSPSHPVSQTQHASG	K(0.184)LNPVPGSYPTQSCH(0.19)PH(0.537)LSPSH(0.087)PVSQTQH(0.001)ASGQK(0.002)
Q6NUK4	154	0.999813	38.665	55.177	H	KSQGAITERLRSFSMHDLTTIQGDEPVGQRP	SFSMH(1)DLTTIQGDEPVGQRPYQPLPEAK
Q6NUP7	564	0.99142	21.4637	70.335	H	TLCIFLRYNRKQEQRHEVIQKLIEQLGQGKS	QEQR(0.991)H(0.991)EVIQK(0.003)LIEQLGQGK(0.014)
Q6NZI2	370	0.800336	6.03004	55.171	H	RGEAGDLRRGSSPDVHALLEITEESDAVLVD	R(0.2)GSSPDVH(0.8)ALLEITEESDAVLVDKSDSD
Q6P0N0	538	0.978234	16.6798	126.26	H	TYDFDCDNLELKSNKHSESPGATELNMCHSN	H(0.978)SESPGATELNMCH(0.001)SNCQNK(0.021)PTLR
Q6P0N0	1040	1	82.7358	108.72	H	PSSVIFPLVKTPQCQHVSPGMLGSINRNDCD	TPQCQH(1)VSPGMLGSINR
Q6P0Q8	190	0.93392	11.4872	70.535	H	SLIVTSSTSPTLPRPHSPLHGHTGNSPLDSP	SLIVTSSTSPTLPR(0.986)PH(0.934)SPLH(0.079)GH(0.001)TGNSPLDSPR
Q6P2E9	881	0.999176	30.8348	83.647	H	LQQRDSQDASAEQSDHDDEVASLASASGGFG	DSQDASAEQSDH(0.999)DDEVASLASASGGFGTK(0.001)
Q6P3S6	538	0.99376	21.9885	64.545	H	VGGSMRHPPEQTNGVHTPPHVASALAGAVSP	H(0.027)PPEQTNGVH(0.994)TPPH(0.979)VASALAGAVSPGALR
Q6P3S6	542	0.979079	16.7498	64.545	H	MRHPPEQTNGVHTPPHVASALAGAVSPGALR	H(0.027)PPEQTNGVH(0.994)TPPH(0.979)VASALAGAVSPGALR
Q6P3W7	707	0.655641	5.65158	101.72	H	QAQKLKSQQPLKPQVHTPVATVKQTKDLTDT	SQQPLK(0.178)PQVH(0.656)TPVATVK(0.166)
Q6P9B9	698	0.772195	5.30152	52.318	H	AGLKAVLQLLVEGALHRGNTELFGGQVDGDN	LSQTSPAGLK(1)AVLQLLVEGALH(0.772)R(0.228)
Q6PCB5	9	0.999976	49.139	83.202	H	_______MAEPPSPVHCVAAAAPTATVSEKE	AEPPSPVH(1)CVAAAAPTATVSEKEPFGK
Q6PIJ6	718	0.620294	2.1315	97.639	H	SCSSTTASTVGNSSSHNTASQSPDFVRTVNS	NK(0.38)DVYPSCSSTTASTVGNSSSH(0.62)NTASQSPDFVR
Q6PJG2	633	0.933271	11.4839	91.964	H	FIAPPVYSNITPYQSHLRSPVRLADHPSERS	AGTFIAPPVYSNITPYQSH(0.933)LR(0.066)SPVR
Q6PJG6	578	1	65.1351	98.21	H	ASAVTAMGQLSSQGLHAPTSPEHAEARQSLF	ASAVTAMGQLSSQGLH(1)APTSPEHAEAR
Q6PKG0	822	1	120.212	203.74	H	GRTLDAKMPRKRKTRHSSNPPLESHVGWVMD	H(1)SSNPPLESHVGWVMDSR
Q6T4R5	557	0.810855	10.1071	49.623	H	PNDFSEAPSSPSAQDHQPTLGLACSQHLHSP	TPNDFSEAPSSPSAQDH(0.811)QPTLGLACSQH(0.079)LH(0.079)SPQH(0.005)K(0.026)
Q6U841	462	0.988382	19.9788	46.106	H	QEKRKIPAVPNGTAAHGEAEPHGGHSGPELQ	R(0.999)K(0.999)IPAVPNGTAAH(0.988)GEAEPH(0.103)GGH(0.048)SGPELQR(0.862)
Q6UUV7	402	0.91668	11.6337	48.919	H	QPPVSPLTLSPGPEAHQGFSRQLSSTSPLAP	R(0.02)QPPVSPLTLSPGPEAH(0.917)QGFSR(0.063)
Q6UUV9	156	0.861557	7.94022	59.573	H	PADTSWRRTNSDSALHQSTMTPTQPESFSSG	TNSDSALH(0.862)QSTMTPTQPESFSSGSQDVHQK(0.138)
Q6UWY0	468	0.997508	23.8137	46.783	H	AVKFPEITYSLDQKLHSIINYPKVSASVHQY	LH(0.998)SIINYPK(1)VSASVH(0.993)QYNK(0.61)EQFIK(0.4)
Q6UWY0	481	0.992849	19.2363	46.783	H	KLHSIINYPKVSASVHQYNKEQFIKWKQSIG	LH(0.998)SIINYPK(1)VSASVH(0.993)QYNK(0.61)EQFIK(0.4)
Q6UWY2	57	0.999998	57.7311	71.889	H	PHSRPYMASVRFGGQHHCGGFLLRARWVVSA	FGGQH(1)H(1)CGGFLLRAR
Q6UWY2	58	0.999998	57.7311	71.889	H	HSRPYMASVRFGGQHHCGGFLLRARWVVSAA	FGGQH(1)H(1)CGGFLLRAR
Q6WCQ1	367	0.816925	6.49552	95.122	H	PPAPLPDASASPLSPHRRAKSLDRRSTEPSV	DFTNEAPPAPLPDASASPLSPH(0.817)R(0.183)
Q6WKZ4	353	0.80523	6.16399	83.465	H	SSPSSSPSPKGFRKKHLFSSTENLAAGSWKE	H(0.805)LFSSTENLAAGSWK(0.195)EPAEGGGLSSDR
Q6XZF7	339	0.499977	0	50.704	H	SLDCLENTLGVEEQRHETSDHEAEEPDCIIS	H(0.5)ETSDH(0.5)EAEEPDCIISEAPTSPLGHLTSEYDTDR
Q6XZF7	344	0.984739	18.1015	127.92	H	ENTLGVEEQRHETSDHEAEEPDCIISEAPTS	H(0.015)ETSDH(0.985)EAEEPDCIISEAPTSPLGHLTSEYDTDR
Q6YHU6	523	0.991753	20.8012	45.666	H	HLKSQTAESSWIDQWHETWVSPLLFILCEGN	SQTAESSWIDQWH(0.992)ETWVSPLLFILCEGNLDQK(0.008)
Q6ZNB6	64	0.998317	27.7322	169.37	H	TSPGGVATTAAAGSRHSPAGSQALQTTAASE	H(0.998)SPAGSQALQTTAASELMSQK(0.002)
Q6ZNG1	134	0.999996	54.3596	64.295	H	PSVSTSQRISPRPQIHISNNYGNNSPNSSLL	ISPR(1)PQIH(1)ISNNYGNNSPNSSLLPQK
Q6ZQQ6	1339	0.962028	13.8515	55.302	H	IREDMIQGVTQEVIRHKEVMPREEEQAQKKA	EDMIQGVTQEVIR(0.98)H(0.962)K(0.98)EVMPR(0.078)
Q6ZRR5	25	1	52.3207	52.321	H	LCSLCGWLSLYISFCHLNKHRSYEWSCRLVT	MALALCLQVLCSLCGWLSLYISFCH(1)LNK(1)
Q6ZRS2	1945	1	70.0572	73.498	H	QPVASPIGPRSPGPSHPTFWTYTEAAHRAVL	SPGPSH(1)PTFWTYTEAAHR
Q6ZRV2	1066	0.551287	1.01566	53.214	H	GQKHRAVPAPSPGPTHNSPELGRPPAAGVLA	AVPAPSPGPTH(0.551)NSPELGR(0.436)PPAAGVLAPDMSDK(0.006)DK(0.006)
Q6ZRV2	841	0.946623	13.4402	55.765	H	SGSDRLPSRFLSAQSHSTSPQGLDSPLPLEG	FLSAQSH(0.947)STSPQGLDSPLPLEGSGAH(0.043)QVLH(0.001)NESK(0.01)
Q6ZS17	400	0.973824	15.7058	103.99	H	SSDDSSSPQLSGTARHSPAPRPLVQQPEPLP	H(0.974)SPAPR(0.026)PLVQQPEPLPIQVAFR
Q6ZTB9	116	0.996678	24.785	111.46	H	KAFSYSSYFRIHERIHTGEQVYKCKECGKTF	IHER(0.003)IH(0.997)TGEQVYK
Q70EL1	646	0.960723	13.9543	68.044	H	PSPQYKRWGPARPGSHLLEQHPRLIQRMESG	WGPAR(0.039)PGSH(0.961)LLEQH(0.848)PR(0.152)
Q70EL1	651	0.870524	8.34767	73.022	H	KRWGPARPGSHLLEQHPRLIQRMESGYESSE	WGPAR(0.638)PGSH(0.362)LLEQH(0.871)PR(0.129)
Q70EL4	393	0.99791	26.7849	83.53	H	PRLAAREGQRFSLSLHSESKVLILFCNLVGS	LAAR(1)EGQR(0.999)FSLSLH(0.998)SESK(0.003)
Q70Z35	581	0.999987	48.7985	150.09	H	DEEMEGSNMKHRLMKHDLKVVENVIAKSLLI	LMK(1)H(1)DLKVVENVIAK
Q76FK4	346	0.867812	7.45354	60.345	H	SDPFEVVRDDFKSGVHKLHSLIGLGIKNRVS	SGVH(0.868)K(0.868)LH(0.265)SLIGLGIK(1)
Q76I76	460	0.991552	23.2731	94.707	H	ILLASKQRHNKLWRSHSDSDLSDHHEPICKP	SH(0.992)SDSDLSDH(0.004)H(0.005)EPICKPGLELNKK
Q76I76	469	0.475	0.853472	69.255	H	NKLWRSHSDSDLSDHHEPICKPGLELNKKDI	SH(0.03)SDSDLSDH(0.39)H(0.475)EPICK(0.022)PGLELNK(0.045)K(0.039)
Q7L2J0	282	0.999262	32.4238	89.694	H	GQHHQQQQAAGGSESHPVPPTAPLTPLLHGE	GQHHQQQQAAGGSESH(0.999)PVPPTAPLTPLLH(0.001)GEGASQQPR
Q7L2J0	295	0.505521	0.863819	49.937	H	ESHPVPPTAPLTPLLHGEGASQQPRHRGQNR	HRGQHH(0.001)QQQQAAGGSESH(0.414)PVPPTAPLTPLLH(0.506)GEGASQQPR(0.079)
Q7L4I2	83	0.999898	36.3584	69.672	H	KEGRRHESKDKSSKKHKSEEHNDKEHSSDKG	H(1)K(1)SEEH(0.878)NDK(0.561)EH(0.561)SSDK(1)
Q7L4I2	88	0.878238	5.56855	69.672	H	HESKDKSSKKHKSEEHNDKEHSSDKGRERLN	H(1)K(1)SEEH(0.878)NDK(0.561)EH(0.561)SSDK(1)
Q7L4I2	93	0.5611	0	69.672	H	KSSKKHKSEEHNDKEHSSDKGRERLNSSENG	H(1)K(1)SEEH(0.878)NDK(0.561)EH(0.561)SSDK(1)
Q7L9B9	8	0.997753	26.4801	80.231	H	________MGSTLGCHRSIPRDPSDLSHSRK	MGSTLGCH(0.998)R(0.002)SIPR
Q7LFX5	255	1	51.9416	51.942	H	LAHAHGKHFRLRCLPHFYIIGQPKCGTTDLY	CLPH(1)FYIIGQPK(1)CGTTDLYDR(1)LR(1)
Q7RTX7	457	1	90.6566	90.657	H	QQQDLLSALVSMEKVHDSSSQILLKKHKSSH	VH(1)DSSSQILLK(1)
Q7Z2W4	281	0.499995	0	66.138	H	ASAERSCTPSPDQISHRASLEDAPVDDLTRK	SCTPSPDQISH(0.5)R(0.5)ASLEDAPVDDLTR
Q7Z2Z1	1126	0.499999	0	89.629	H	QKSLSFSKTTPRRISHTPQTPLYTPERLQKS	R(0.5)ISH(0.5)TPQTPLYTPER
Q7Z309	57	0.962478	14.7203	97.203	H	YTLRTRRNSTTIMSRHSLEEGLDMVNRETAH	RNSTTIMSR(0.037)H(0.962)SLEEGLDMVNR(0.001)
Q7Z309	30	1	88.5317	98.676	H	SYGGTLRRSSSAPLIHGLSDLSQVFQPYTLR	SSSAPLIH(1)GLSDLSQVFQPYTLR
Q7Z3K6	20	0.888279	9.05329	53.32	H	SFGSSSPVGSLSSEDHDFDPTAEMLVHDYDD	AEASFGSSSPVGSLSSEDH(0.888)DFDPTAEMLVH(0.11)DYDDER(0.001)
Q7Z401	1013	0.5	0	117.48	H	TNETRNIQSRCFRKRHKSDNETNLQQQVVWG	H(0.5)K(0.5)SDNETNLQQQVVWGNR
Q7Z4H7	862	0.499551	0	72.433	H	KREESYLSNSQTPERHKPELSPTPQNVQTDD	H(0.5)K(0.5)PELSPTPQNVQTDDTLNFLDTCDLHTEHIK(0.001)PSLR
Q7Z5J4	919	0.979634	16.8217	115.38	H	VEEVLDSKAGWGSPCHLSGESVILLGPTVGT	AGWGSPCH(0.98)LSGESVILLGPTVGTESK(0.02)
Q7Z5L9	408	0.78475	5.61789	58.082	H	PTSSFVSPPPPTASPHSNRTTPPEAAQNGQS	IPMTPTSSFVSPPPPTASPH(0.785)SNR(0.215)
Q7Z5M8	151	0.427104	0	71.929	H	RDGNPIIVYLHGSAEHRAASHRLKLVKVLSD	DGNPIIVYLHGSAEH(0.427)R(0.427)AASH(0.114)R(0.032)
Q7Z5P4	295	0.506244	0	52.483	H	ILNRMQNIQFEAVVGHKIKMK__________	FLPER(1)ASAILNR(0.988)MQNIQFEAVVGH(0.506)K(0.506)
Q7Z6B0	75	0.970806	15.2185	68.834	H	GCLSSDAIISSPENTHAANSIVSQTIPKAQI	DHSSSIGCLSSDAIISSPENTH(0.971)AANSIVSQTIPK(0.029)
Q7Z6B7	950	0.5	0	61.776	H	IRRSTSSGQYTGFNDHKPLDPETIAQDIEET	STSSGQYTGFNDH(0.5)K(0.5)PLDPETIAQDIEETMNTALNELR
Q7Z6I6	270	0.998928	29.6358	78.149	H	SILQAGDGPPQMRPYHTIIEIAEHKRKGSLK	PYH(0.999)TIIEIAEH(0.987)K(0.014)
Q7Z6I6	278	0.98695	18.7822	78.149	H	PPQMRPYHTIIEIAEHKRKGSLKVRKWRSIF	PYH(0.999)TIIEIAEH(0.987)K(0.014)
Q7Z6J0	322	0.731483	4.35233	87.671	H	SLTMANKSSQASQNRHSMEISPPVLISSSNP	SSQASQNR(0.269)H(0.731)SMEISPPVLISSSNPTAAAR
Q86TM6	158	0.996752	23.73	45.423	H	SLMFLLGILDFLFVSHAYHSILTRGASVQLV	IVSLMFLLGILDFLFVSH(0.997)AYH(0.77)SILTR(0.233)
Q86TM6	161	0.769858	5.2258	45.423	H	FLLGILDFLFVSHAYHSILTRGASVQLVFGF	IVSLMFLLGILDFLFVSH(0.997)AYH(0.77)SILTR(0.233)
Q86UQ4	1647	0.498856	0	69.765	H	IQLIRDVFNSLMPVVHHTSPQNAGYMQALKK	DVFNSLMPVVH(0.499)H(0.499)TSPQNAGYMQALK(0.501)K(0.501)
Q86UQ4	1648	0.498856	0	69.765	H	QLIRDVFNSLMPVVHHTSPQNAGYMQALKKV	DVFNSLMPVVH(0.499)H(0.499)TSPQNAGYMQALK(0.501)K(0.501)
Q86UU0	931	0.568264	0	57.565	H	DLTISINQMGSPGMGHLKSPTLSQVHSPLVT	RPSDLTISINQMGSPGMGH(0.568)LK(0.558)SPTLSQVH(0.845)SPLVTSPSANLK(0.028)
Q86UU0	941	0.969983	14.6636	66.201	H	SPGMGHLKSPTLSQVHSPLVTSPSANLKSPQ	SPTLSQVH(0.97)SPLVTSPSANLK(0.908)SPQTPSQMVPLPSANPPGPLK(0.122)
Q86UU1	498	1	72.886	77.051	H	NREVAESPRPRRWAAHGASPEDFSLTLGARG	WAAH(1)GASPEDFSLTLGAR
Q86V15	1473	0.960145	13.8538	76.927	H	HCTRENCGYKFCGRTHMYKHAQHHDRVDNLV	FCGR(0.04)TH(0.96)MYK(0.998)H(0.998)AQH(0.502)H(0.502)DR(0.001)
Q86V15	1477	0.997575	23.36	76.927	H	ENCGYKFCGRTHMYKHAQHHDRVDNLVLDDF	FCGR(0.04)TH(0.96)MYK(0.998)H(0.998)AQH(0.502)H(0.502)DR(0.001)
Q86V15	1480	0.502071	0	76.927	H	GYKFCGRTHMYKHAQHHDRVDNLVLDDFKRF	FCGR(0.04)TH(0.96)MYK(0.998)H(0.998)AQH(0.502)H(0.502)DR(0.001)
Q86V15	1481	0.502087	0	76.927	H	YKFCGRTHMYKHAQHHDRVDNLVLDDFKRFK	FCGR(0.04)TH(0.96)MYK(0.998)H(0.998)AQH(0.502)H(0.502)DR(0.001)
Q86V42	313	0.999929	44.4464	132.53	H	KKRHSTPLPSTAVPSHTPGSSQQSPLNSPHP	HSTPLPSTAVPSH(1)TPGSSQQSPLNSPHPGPIR
Q86V48	818	1	81.6237	120.83	H	SSSPRAAPGEALRERHTSTSNIQVGLAELTS	H(1)TSTSNIQVGLAELTSVSNHVSSPFELSIHK
Q86V81	89	0.404681	0	52.329	H	PAPYSRPKQLPDKWQHDLFDSGFGGGAGVET	QLPDK(0.405)WQH(0.405)DLFDSGFGGGAGVETGGK(0.191)
Q86VQ1	261	0.698831	4.55812	241.41	H	QSSRHSKEKDRQSPLHGNHITISHTQATGSR	EK(0.052)DR(0.245)QSPLH(0.699)GNH(0.004)ITISHTQATGSR
Q86VQ1	264	0.999262	31.3189	219.95	H	RHSKEKDRQSPLHGNHITISHTQATGSRSVP	DRQSPLH(0.001)GNH(0.999)ITISHTQATGSR
Q86WP2	47	0.999994	52.4087	99.371	H	NFAWTENRYDVNRRRHNSSDGFDSAIGRPNG	H(1)NSSDGFDSAIGRPNGGNFGR
Q86WR7	292	0.832836	7.32795	134.66	H	SVQERRAQVLATIHGHAGAFPAAGDAGEGAP	RAQVLATIH(0.013)GH(0.833)AGAFPAAGDAGEGAPGGGSSPER(0.154)
Q86XP3	749	0.960608	13.8713	71.338	H	AGSLNSVPTNSAQQGHNSPDSPVTSAAKGIP	AGSSAAGASGWTSAGSLNSVPTNSAQQGH(0.961)NSPDSPVTSAAK(0.039)
Q86YR7	656	0.996344	23.3203	41.483	H	IIDGYITPMDFIWLKHLIPDVLQNNKDFLFG	SIIDGYITPMDFIWLK(0.999)H(0.996)LIPDVLQNNK(0.215)DFLFGNIR(0.79)
Q8IU81	435	0.99664	24.7264	128.74	H	PSPIAALKNVAEALGHSPKDPGGGGGPVRAG	NVAEALGH(0.997)SPK(0.003)DPGGGGGPVR
Q8IUE0	131	0.999857	40.5306	51.554	H	RRNDPIIGHKTGKDAHATHLQSTEASVPAKS	DAH(1)ATH(1)LQSTEASVPAKSGPVVQTMYK
Q8IUE0	134	0.999857	40.5306	51.554	H	DPIIGHKTGKDAHATHLQSTEASVPAKSGPV	DAH(1)ATH(1)LQSTEASVPAKSGPVVQTMYK
Q8IV32	7	0.99914	30.652	71.379	H	_________MSVVVQHVEEKAVHSWSRISTA	MSVVVQH(0.999)VEEK(0.001)
Q8IVL0	341	0.81379	6.49827	72.34	H	PSASKPWRSKSMNVKHSATSTMLTVKQSSTA	SK(0.004)SMNVK(0.182)H(0.814)SATSTMLTVK
Q8IVL1	1537	1	64.577	76.804	H	SQLRTQEDAKEWLRSHSAGGLQDTAANSPFS	SH(1)SAGGLQDTAANSPFSSGSSVTSPSGTR
Q8IVT2	71	0.999924	41.2126	106.16	H	RAQQGVQRQGVSYSVHAYTGQPSPRGLHSEN	QGVSYSVH(1)AYTGQPSPR
Q8IWI9	2591	0.908795	12.2715	51.758	H	KKDQATENTSPLNTPHTSANLVMTPQGQLLT	K(0.054)K(0.019)DQATENTSPLNTPH(0.909)TSANLVMTPQGQLLTLK(0.018)
Q8IWZ3	1558	0.916465	10.0113	74.742	H	RKNKKNKTKETPPTAHLILPEQHMSLAQQKA	NK(0.899)TK(0.195)ETPPTAH(0.916)LILPEQH(0.983)MSLAQQK(0.007)
Q8IWZ8	481	0.994919	22.9188	151.3	H	QDMQLLWEKAVQQHQHGYDSDEEVDSELGTW	AVQQH(0.005)QH(0.995)GYDSDEEVDSELGTWEHQLR
Q8IXK0	615	0.768781	7.66066	85.191	H	KYAQGFLPEKLPQQDHTTTTDSEMEEPYLQE	YAQGFLPEK(0.099)LPQQDH(0.769)TTTTDSEMEEPYLQESK(0.132)
Q8IXQ3	90	0.446293	0	66.083	H	DSGDNSAPSGQEREDHGLETGDPPLPPPPVL	R(0.107)DSGDNSAPSGQER(0.446)EDH(0.446)GLETGDPPLPPPPVLPGPGEELPGAR
Q8IXT5	574	0.836402	7.08904	108.47	H	RHSSEDFRFPPEDFRHSPEDFRRPREEDFRR	FPPEDFR(0.163)H(0.836)SPEDFR
Q8IY92	1351	0.500384	2.79452	95.223	H	RRQGHRSPSRPHPGGHPHSSPLAPHPISGDR	SPSR(0.057)PH(0.18)PGGH(0.5)PH(0.263)SSPLAPHPISGDR
Q8IY92	1353	0.646505	7.40156	48.489	H	QGHRSPSRPHPGGHPHSSPLAPHPISGDRAH	SPSR(0.118)PH(0.118)PGGH(0.118)PH(0.647)SSPLAPH(0.001)PISGDR
Q8IYA7	250	1	74.1764	78.221	H	MATNTTMMGKTRQRNHSGSFSSNEFEEELVS	NH(1)SGSFSSNEFEEELVSPSSSETEGNFVYR
Q8IYF1	9	0.838514	7.25548	55.66	H	_______MAAGSTTLHAVEKLQVRLATKTEP	MAAGSTTLH(0.839)AVEK(0.158)LQVR(0.004)
Q8IYT3	613	0.999996	53.6787	94.402	H	EKKLMSVKSELDTTEHEAKENKERARNMIEV	SELDTTEH(1)EAK(0.005)ENK(0.995)
Q8IZ21	350	0.999999	61.3186	88.548	H	LPMISPRSPSPPLPTHIPPEPPRTPPFPAKT	SPSPPLPTH(1)IPPEPPR(0.984)TPPFPAK(0.016)
Q8IZD2	1294	0.928964	12.4925	45.227	H	KDSGGESPCVSCSPSHVQSSPSSHSNHIPQL	DK(0.053)DSGGESPCVSCSPSH(0.929)VQSSPSSH(0.777)SNH(0.157)IPQLQAK(0.084)
Q8IZD2	1302	0.777365	8.2302	45.227	H	CVSCSPSHVQSSPSSHSNHIPQLQAKGPVPS	DK(0.053)DSGGESPCVSCSPSH(0.929)VQSSPSSH(0.777)SNH(0.157)IPQLQAK(0.084)
Q8N122	872	0.539137	0.926679	92.518	H	TQSAPASPTNKGVHIHQAGGSPPASSTSSSS	GVH(0.025)IH(0.539)QAGGSPPASSTSSSSLTNDVAK(0.436)
Q8N1G0	1049	1	72.1497	93.598	H	TFSSRLILEKHVQVRHGLQLGAQSPGRGTTL	H(1)GLQLGAQSPGR
Q8N201	1904	0.978117	16.7672	42.348	H	HGRTHLNFQEFRQQNHLSCFLHVLGLLELLQ	QQNH(0.978)LSCFLH(0.972)VLGLLELLQPH(0.029)VFR(0.021)
Q8N201	1910	0.972338	16.7672	42.348	H	NFQEFRQQNHLSCFLHVLGLLELLQPHVFRS	QQNH(0.978)LSCFLH(0.972)VLGLLELLQPH(0.029)VFR(0.021)
Q8N2G6	68	0.999999	63.5656	145.88	H	LAFGKGRPEQLGSPLHSSYLNSFFQLQRGEA	GRPEQLGSPLH(1)SSYLNSFFQLQR
Q8N2M8	88	0.89608	11.5879	55.228	H	TNNMIDRFDVRAHLDHIPDYTPPLLTTISPE	AH(0.042)LDH(0.896)IPDYTPPLLTTISPEQESDER(0.062)
Q8N2R8	210	0.999995	52.8506	55.536	H	ALAEFKRLKRRDDARHQQQELVGAHTIPLVP	DDAR(1)H(1)QQQELVGAH(0.998)TIPLVPLR(0.002)
Q8N2R8	219	0.998023	27.0311	55.536	H	RRDDARHQQQELVGAHTIPLVPLRKLLLHGP	DDAR(1)H(1)QQQELVGAH(0.998)TIPLVPLR(0.002)
Q8N302	347	0.997705	29.1966	88.571	H	KVTVPTSGNTIESPLHENISNSTSFKDEKIM	VTVPTSGNTIESPLH(0.998)ENISNSTSFK(0.001)DEK(0.001)
Q8N3E9	107	0.999999	59.2927	78.69	H	LSVWFQRRIPRAPSQHIFFVQHIEAVREGHQ	APSQH(1)IFFVQHIEAVR
Q8N3U4	20	0.914119	10.271	47.919	H	PEIPTDFNLLQESETHFSSDTDFEDIEGKNQ	MIAAPEIPTDFNLLQESETH(0.914)FSSDTDFEDIEGK(0.086)
Q8N3V7	790	0.983102	17.6476	88.945	H	VASRSPARTPPASLYHGYLPENGVLRPEPTK	TPPASLYH(0.983)GYLPENGVLRPEPTK(0.017)
Q8N4C8	917	0.999034	30.3428	80.68	H	DSNGYTNLPDVVQPSHSPTENSKGQSPPSKD	NLLHADSNGYTNLPDVVQPSH(0.999)SPTENSK(0.001)
Q8N4C8	78	0.950703	12.8841	94.409	H	EEEIKQEINMLKKYSHHRNIATYYGAFIKKN	QEINMLK(0.503)K(0.503)YSH(0.951)H(0.951)R(0.093)
Q8N4C8	79	0.950703	12.8841	94.409	H	EEIKQEINMLKKYSHHRNIATYYGAFIKKNP	QEINMLK(0.503)K(0.503)YSH(0.951)H(0.951)R(0.093)
Q8N4C8	755	0.993723	21.9978	138.24	H	SDPGWERSDSVLPASHGHLPQAGSLERNRVG	SDSVLPASH(0.994)GH(0.006)LPQAGSLER
Q8N568	449	0.882332	8.84255	48.984	H	EHLIENEVSILRRVKHPNIIMLVEEMETATE	VK(0.117)H(0.882)PNIIMLVEEMETATELFLVMELVK(0.001)
Q8N5S9	98	0.90636	9.87239	71.265	H	YLEAQAGPYATGPASHISPRAWRRPTIESHH	KLSLQERPAGSYLEAQAGPYATGPASH(0.906)ISPR(0.093)
Q8N6H7	145	0.990366	22.6762	111.09	H	GTDLWIDNMSSAVPNHSPEKKDSDFFTEHTQ	HGTDLWIDNMSSAVPNH(0.99)SPEK(0.005)K(0.004)
Q8N8E2	514	0.979161	17.2182	57.673	H	AGGPGLSASEGWAPPHSPPSVLSSRGPPALG	VH(0.001)GH(0.002)GGAGGPGLSASEGWAPPH(0.979)SPPSVLSSR(0.019)
Q8N8Z6	632	0.999999	64.2366	82.139	H	AQSGYRVPGPQPGHKHSLSSGGFSPVAGVGA	H(1)SLSSGGFSPVAGVGAQDGDYQRPHSAQPADR
Q8N999	216	0.857115	7.24802	64.68	H	INGNPYGLGSKKHPLHLLIPHGAFQIRNLPS	K(0.87)H(0.272)PLH(0.857)LLIPH(0.016)GAFQIR(0.897)NLPSLK(0.088)
Q8N9C0	460	0.742499	4.59968	85.355	H	KDVTLRWKKDGQLLMHGTKYSMNHEGKRAEL	WKKDGQLLMH(0.742)GTK(0.257)
Q8NB50	95	0.828394	6.8388	89.502	H	NIKTEQEGEASEKSLHLSPQHITHQTMPIGQ	SLH(0.828)LSPQH(0.172)ITHQTMPIGQR
Q8NBE8	149	0.753737	5.27427	40.098	H	LDIDNCIGMHSFAEFHVCPELEKESRRILCS	FLVR(0.004)H(0.004)LDIDNCIGMH(0.014)SFAEFH(0.754)VCPELEK(0.224)
Q8NCN4	381	0.754196	7.56262	52.971	H	SVSPESNDSISEELNHFKPIVCSPCTPPKRL	SVSPESNDSISEELNH(0.754)FK(0.132)PIVCSPCTPPK(0.114)
Q8ND24	524	0.774439	5.42048	52.234	H	RNSPGLGSLVSPHGPHMPPAASIPPPPGLGG	NSPGLGSLVSPH(0.222)GPH(0.774)MPPAASIPPPPGLGGVK(0.003)
Q8NDF8	58	0.986348	19.7483	62.547	H	AGSSASSPPSASSSPHPSAAVPAADPADSAS	R(0.003)AGSSASSPPSASSSPH(0.986)PSAAVPAADPADSASGSSNK(0.01)R
Q8NDV3	3	0.999834	36.825	56.514	H	_____________MAHLELLLVENFKSWRGR	MAH(1)LELLLVENFK(0.992)SWR(0.808)GR(0.2)
Q8NDX5	870	0.999991	50.457	63.272	H	QLPITYPSAEEDLASHEDSVPSAMTTRLRRQ	QLPITYPSAEEDLASH(1)EDSVPSAMTTR
Q8NE01	690	0.583556	1.46647	69.03	H	TRLLGEKTTTAAGSSHSRPGVPVEGSPGRNP	TTTAAGSSH(0.584)SR(0.416)PGVPVEGSPGRNPGV
Q8NEM0	282	0.969143	16.3309	84.365	H	LVLKANNIHSSPSFTHLDKSSPQKFLSNLSK	ANNIHSSPSFTH(0.969)LDK(0.023)SSPQK(0.008)
Q8NEM7	384	0.723107	7.15385	64.779	H	PCKADEESDSQMSPSHSSTDDHSNWFIIGSK	IQPCK(0.139)ADEESDSQMSPSH(0.723)SSTDDH(0.115)SNWFIIGSK(0.022)
Q8NEV8	939	0.998412	27.7926	47.745	H	KDNAGKNQKNQFIVSHSENQERNDSPVPTHD	NQFIVSH(0.998)SENQER(0.991)NDSPVPTH(0.966)DEVVDVK(0.045)
Q8NEV8	953	0.971372	15.2562	47.745	H	SHSENQERNDSPVPTHDEVVDVKCHSHSPFR	NQFIVSH(0.997)SENQER(0.992)NDSPVPTH(0.971)DEVVDVK(0.04)
Q8NEZ4	2950	0.996677	24.7699	49.273	H	SGSPPPPTLPASPSNHVSSLPPFIAPPGRVL	SDNSDIR(1)PSGSPPPPTLPASPSNH(0.997)VSSLPPFIAPPGR(0.003)
Q8NF91	8220	0.800365	6.03804	88.394	H	RYHKKLIRLPLPDDEHDLSDRELELEDSAAL	LPLPDDEH(0.8)DLSDR(0.199)ELELEDSAALSDLHWHDR
Q8NFD5	581	1	87.0947	120.86	H	YAAASPAWAAAQQRSHPAMSPGTPGPTMGRS	SH(1)PAMSPGTPGPTMGR
Q8NFF5	567	0.878468	8.59038	85.397	H	NTVRNPALKCLSPGGHPTYRPAYLLENEEEE	CLSPGGH(0.878)PTYR(0.122)PAYLLENEEEER
Q8NFQ8	119	0.979876	19.5709	102.46	H	PSENLGKEPLDPDPSHSPSDKVGRADAHLGS	GHH(0.001)LPSENLGK(0.011)EPLDPDPSH(0.98)SPSDK(0.008)VGR
Q8NHG8	118	0.999993	51.3293	64.002	H	IPNSSSGPYGSQDSVHSSPEDGGGGRDRPVG	AAQSPFSIPNSSSGPYGSQDSVH(1)SSPEDGGGGR
Q8NHH9	32	0.989092	19.7223	81.28	H	LWRRRRTSDPSAAVNHVSSTTSLGENYEDDD	R(0.011)TSDPSAAVNH(0.989)VSSTTSLGENYEDDDLVNSDEVMK
Q8NHU6	164	0.843322	7.81355	41.434	H	SVGVKPDAEMSPYMLHTTLGNEAFKDIPVQR	PDAEMSPYMLH(0.843)TTLGNEAFK(0.159)DIPVQR(0.486)H(0.486)VTMSTNNR(0.025)
Q8NHU6	180	0.486495	0	41.434	H	TTLGNEAFKDIPVQRHVTMSTNNRFSPKASL	PDAEMSPYMLH(0.843)TTLGNEAFK(0.159)DIPVQR(0.486)H(0.486)VTMSTNNR(0.025)
Q8NHV4	458	0.902548	11.2807	82.773	H	FPPRKNPVTSSTSVLHSSPLNVFMGSPGKEE	NPVTSSTSVLH(0.903)SSPLNVFMGSPGK(0.067)EENENR(0.026)DLTAESK(0.004)
Q8TAP9	111	0.869773	8.24705	70.15	H	GSQQQFGYSPGQQQTHPQGSPRTSTPFGSGR	SPAGSQQQFGYSPGQQQTH(0.87)PQGSPR(0.13)
Q8TBC3	633	0.986924	17.9697	50.499	H	GCLPSPSPRISLTSLHSASSNTSLSGHRGSP	ISLTSLH(0.987)SASSNTSLSGH(0.821)R(0.191)GSPSPPQAEAR(0.001)
Q8TBC3	644	0.820917	6.56243	50.499	H	LTSLHSASSNTSLSGHRGSPSPPQAEARRRG	ISLTSLH(0.987)SASSNTSLSGH(0.821)R(0.191)GSPSPPQAEAR(0.001)
Q8TBY8	358	1	69.716	69.716	H	KRNIMKDMMKLELDLHGLREETSAHIERKDK	DMMK(1)LELDLH(1)GLR(1)
Q8TBZ9	6	0.999961	44.1895	83.137	H	__________MSFSVHNQKGSKRPLPLEPLL	MSFSVH(1)NQKGSKR
Q8TC05	634	0.99754	26.179	64.538	H	PKYPTNPPGQLPSPPHVPSYWHPSRRIQGSL	YPTNPPGQLPSPPH(0.998)VPSYWH(0.002)PSR
Q8TDM6	1463	0.648705	2.75364	48.671	H	GTHSTLQGSGTTTPEHPSVIDPLMEQDEGPS	SSSHLDPAGTH(0.007)STLQGSGTTTPEH(0.649)PSVIDPLMEQDEGPSTPPAK(0.344)
Q8TDN6	258	1	104.735	170.26	H	IFQGSFGGPTLYENPHYQSPNMHRRVIRSIT	IFQGSFGGPTLYENPH(1)YQSPNMHR
Q8TDX7	194	1	109.258	158.34	H	DLGLGRFFSSKTTAAHSLVGTPYYMSPERIH	TTAAH(1)SLVGTPYYMSPER
Q8TDY2	427	0.543912	0	56.416	H	LCLSHANQLMIMLQNHRKLLDIKQKCTTAKQ	DASVLPDLCLSH(0.037)ANQLMIMLQNH(0.544)R(0.544)K(0.867)LLDIK(0.008)
Q8TDZ2	616	0.979784	16.8544	63.462	H	IAYLSHFHSAFKSMAHSPGPVSQASPGTSSA	SMAH(0.98)SPGPVSQASPGTSSAVLFLSK(0.02)
Q8TE73	477	0.645968	5.72948	79.326	H	FDFSEMYIFGKFETFHRRLAKIIDIFTTLKT	QFDFSEMYIFGK(0.048)FETFH(0.646)R(0.134)R(0.173)
Q8TE77	408	0.777333	3.97903	44.916	H	KETHRFIEAARAQGTHVLVHCKMGVSRSAAT	AQGTH(0.777)VLVH(0.777)CK(0.448)MGVSR(0.006)SAATVLAYAMK(0.992)
Q8TE77	412	0.777316	3.97903	44.916	H	RFIEAARAQGTHVLVHCKMGVSRSAATVLAY	AQGTH(0.777)VLVH(0.777)CK(0.448)MGVSR(0.006)SAATVLAYAMK(0.992)
Q8TEB9	298	0.935948	11.6651	65.25	H	WDRGNTRNSPPPYGFHLSPEEMRRQRLHRFD	GNTR(0.064)NSPPPYGFH(0.936)LSPEEMR
Q8TEK3	789	0.973119	15.7436	77.221	H	LSPAKIVLRRHLSQDHTVPGRPAASELHSRA	H(0.026)LSQDH(0.973)TVPGR(0.001)PAASELHSR
Q8TEK3	1004	0.999336	31.7739	112.64	H	LLLAQPRNSLPASPAHQLSSSPRLGGAAQGP	NSLPASPAH(0.999)QLSSSPR(0.001)
Q8TEM1	1851	0.999999	58.7377	72.033	H	DLAVPAALTPRASPGHSPHYFAASSPTSPNA	ASPGH(1)SPH(1)YFAASSPTSPNALPPAR
Q8TEM1	1854	0.999999	58.7078	72.033	H	VPAALTPRASPGHSPHYFAASSPTSPNALPP	ASPGH(1)SPH(1)YFAASSPTSPNALPPAR
Q8TEU7	1235	0.999977	46.3637	137.43	H	GKKHTEDTISVASSLHSSPPASPQGSPHKGY	HTEDTISVASSLH(1)SSPPASPQGSPHK
Q8TEW0	716	1	63.7364	108.35	H	LPIETALDDRERRISHSLYSGIEGLDESPSR	ISH(1)SLYSGIEGLDESPSR
Q8TF63	23	0.750668	4.81298	50.237	H	HIQNSRSHGLETVPGHQRLERGAGGETPEFP	HYGAATHIQNSRSH(0.001)GLETVPGH(0.751)QR(0.248)
Q8TF72	1501	0.712641	4.61395	58.924	H	SLRISESVLRDSPPPHEDYEDEVFVRDPHPK	ISESVLR(0.023)DSPPPH(0.713)EDYEDEVFVR(0.01)DPH(0.008)PK(0.246)
Q8TF72	433	0.910482	7.66785	75.064	H	NSLGSLKSPFIEEQLHTVLEKSPENSPPVKP	SPFIEEQLH(0.91)TVLEK(0.53)SPENSPPVK(0.454)PK(0.105)
Q8WTS6	15	0.979093	16.738	40.92	H	_MDSDDEMVEEAVEGHLDDDGLPHGFCTVTY	MDSDDEMVEEAVEGH(0.979)LDDDGLPH(0.021)GFCTVTYSSTDR
Q8WUA4	884	1	83.0286	153.97	H	LASPLGHRMQLESRAHFNAMFQPSSPTRRPG	AH(1)FNAMFQPSSPTR
Q8WUA7	170	0.999989	49.6093	52.858	H	SASDAAPLQRSQSLPHSATVTLGGTSDPSTL	SQSLPH(1)SATVTLGGTSDPSTLSSSALSER
Q8WUY3	760	1	89.7886	102.27	H	MEKSPLPNTSPQGTNHLIEDFASLWHSGRSP	SPLPNTSPQGTNH(1)LIEDFASLWHSGR
Q8WV41	140	0.999864	39.3086	54.263	H	TVVEEPRAGGLGTNGHPPLNLSYPGAYPSQH	AGGLGTNGH(1)PPLNLSYPGAYPSQHMAFR
Q8WVM7	1140	0.872823	7.70755	47.238	H	NSRPMGDQIQEPESEHGSEPDFLHNPQMQIS	ENSR(0.002)PMGDQIQEPESEH(0.873)GSEPDFLH(0.872)NPQMQISWLGQPK(0.253)
Q8WVM7	1148	0.872277	7.70755	47.238	H	IQEPESEHGSEPDFLHNPQMQISWLGQPKLE	ENSR(0.002)PMGDQIQEPESEH(0.873)GSEPDFLH(0.872)NPQMQISWLGQPK(0.253)
Q8WX93	749	1	56.4743	56.474	H	PKQFIAAQNLGPASGHGTPASSPSSSSLPSP	QFIAAQNLGPASGH(1)GTPASSPSSSSLPSPMSPTPR(1)
Q8WX94	556	0.9984	27.8789	62.528	H	RMSPDIKQELLQCKAHLHANKPLSVTDLKEV	AH(0.998)LH(0.983)ANK(0.018)PLSVTDLK(1)
Q8WX94	558	0.983317	17.6968	62.528	H	SPDIKQELLQCKAHLHANKPLSVTDLKEVLG	AH(0.998)LH(0.983)ANK(0.018)PLSVTDLK(1)
Q8WXE0	315	0.999819	36.6818	45.912	H	ALNVRAGDVITVLEQHPDGRWKGHIHESQRG	DFWNLH(0.156)DPTALNVR(0.845)AGDVITVLEQH(1)PDGR(1)
Q8WXE0	799	0.544144	0.76886	89.239	H	PPATPPDPPRPKRRSHSLSRPGPTEGDAEGE	SH(0.544)SLSR(0.456)PGPTEGDAEGEAEGPVGSTLGSYATLTR
Q8WXG9	5390	0.997897	25.7347	70.563	H	QSGLELREGAVMRRLHLIVTRQPNRAFEDVK	EGAVMR(0.79)R(0.212)LH(0.998)LIVTR(1)
Q8WXH0	2940	0.5	0	81.625	H	NRIQRFIQNTCNEVEHKIKFCRQFHEKTSAL	FIQNTCNEVEH(0.5)K(0.5)
Q8WY36	651	0.993595	21.9067	70.593	H	VDRGKRSSGKGNSSDHEGCWNEESWTFSQSG	GNSSDH(0.994)EGCWNEESWTFSQSGTSGSK(0.006)
Q8WYP3	596	0.963795	14.0854	75.566	H	LIPEDQIDVVLEKAMHKCILKPLKGHVEAML	AMH(0.964)K(0.073)CILK(0.964)PLK(1)
Q8WYP5	1288	0.477967	0	96.489	H	KDRTTSFFLNSPEKEHQEMDEGSQSLEKLDV	TTSFFLNSPEK(0.478)EH(0.478)QEMDEGSQSLEK(0.044)
Q8WZ42	12732	0.998375	27.7332	43.732	H	LTASPDCEIIEDGKKHILILHNCQLGMTGEV	K(0.998)H(0.998)ILILH(0.997)NCQLGMTGEVSFQAANAK(0.971)SAANLK(0.036)
Q8WZ42	12737	0.9969	24.9279	43.732	H	DCEIIEDGKKHILILHNCQLGMTGEVSFQAA	K(0.998)H(0.998)ILILH(0.997)NCQLGMTGEVSFQAANAK(0.971)SAANLK(0.036)
Q92508	726	0.918378	9.43109	53.254	H	MEHVSLPGTRLPRWAHRQDAVSGTPLLREEQ	PFMQLTDMEHVSLPGTR(0.891)LPR(0.906)WAH(0.918)R(0.284)
Q92536	14	0.998284	30.3808	63.932	H	__MEAREPGRPTPTYHLVPNTSQSQVEEDVS	EPGR(0.001)PTPTYH(0.998)LVPNTSQSQVEEDVSSPPQR(0.001)
Q92538	1488	0.999963	45.6413	53.32	H	GQSDDDEDEGVPASYHTVSLQVSQDLLDLMH	GGQSDDDEDEGVPASYH(1)TVSLQVSQDLLDLMHTLHTR
Q92538	366	0.996169	24.3484	41.468	H	ESIPEVLEECTSPADHSDSASVHDMDYVNPR	SQSASVESIPEVLEECTSPADH(0.996)SDSASVH(0.004)DMDYVNPR
Q92540	784	0.325647	0	74.584	H	QSPTKAVPALGKSPPHHSGFQQYQQADASKQ	AVPALGK(0.326)SPPH(0.326)H(0.326)SGFQQYQQADASK(0.023)
Q92540	785	0.325647	0	74.584	H	SPTKAVPALGKSPPHHSGFQQYQQADASKQL	AVPALGK(0.326)SPPH(0.326)H(0.326)SGFQQYQQADASK(0.023)
Q92560	364	0.546875	0.816704	75.623	H	NPTPIVQRLPAFLDNHNYAKSPMQEEEDLAA	LPAFLDNH(0.547)NYAK(0.453)SPMQEEEDLAAGVGR
Q92560	309	0.496467	0	50.35	H	LVLEANRAPAASEGNHTDGAEEAAGSCAQAP	SPLVLEANR(0.496)APAASEGNH(0.496)TDGAEEAAGSCAQAPSH(0.001)SPPNK(0.003)PK(0.003)
Q92574	520	0.710973	4.19773	63.268	H	SPFYRDSLPGSQRKTHSAASSSQGASVNPEP	K(0.27)TH(0.711)SAASSSQGASVNPEPLHSSLDK(0.019)
Q92597	365	0.700316	3.77475	62.193	H	TRSRSHTSEGTRSRSHTSEGAHLDITPNSGA	SH(0.7)TSEGAH(0.294)LDITPNSGAAGNSAGPK(0.006)
Q92597	371	0.825386	7.21842	80.786	H	TSEGTRSRSHTSEGAHLDITPNSGAAGNSAG	SH(0.157)TSEGAH(0.825)LDITPNSGAAGNSAGPK(0.018)
Q92610	683	1	82.0822	107.09	H	NSTAPAAPAPSSSPKHGLTSGSASPPPPALP	H(1)GLTSGSASPPPPALPLYPDPVR
Q92614	1079	0.999997	55.209	69.952	H	RRVSSSSELDLPSGDHCEAGLLQLDVPLLRT	R(1)VSSSSELDLPSGDH(1)CEAGLLQLDVPLLR
Q92619	556	0.581302	1.42951	62.19	H	ASHVRQLQRDQEPDVHYDFEPHVSANAWSPV	DQEPDVH(0.581)YDFEPH(0.418)VSANAWSPVMR
Q92619	958	0.980326	16.9925	82.367	H	PTEATVSLSSLVDYPHQARVIETLIVHYGLV	PRPTEATVSLSSLVDYPH(0.98)QAR(0.02)
Q92736	252	0.996558	29.5125	50.404	H	LHGHMDECLTVPSGEHGEEQRRTVHYEGGAV	LLH(0.001)GH(0.001)MDECLTVPSGEH(0.997)GEEQR(0.001)R
Q92766	1215	0.494573	0	48.76	H	AEDNTQDEVAGAPADHHGPSDEEQGSPPEDK	FSPFLQTAEDNTQDEVAGAPADH(0.495)H(0.495)GPSDEEQGSPPEDK(0.011)
Q92766	1216	0.494573	0	48.76	H	EDNTQDEVAGAPADHHGPSDEEQGSPPEDKL	FSPFLQTAEDNTQDEVAGAPADH(0.495)H(0.495)GPSDEEQGSPPEDK(0.011)
Q92769	391	0.986161	18.9321	86.376	H	HAPGVQMQAIPEDAVHEDSGDEDGEDPDKRI	MLPH(0.001)APGVQMQAIPEDAVH(0.986)EDSGDEDGEDPDK(0.013)R(0.001)
Q92785	230	0.555895	1.0681	70.028	H	GKRYKNRPGLSYHYAHSHLAEEEGEDKEDSQ	NRPGLSYH(0.003)YAH(0.556)SH(0.924)LAEEEGEDK(0.48)EDSQPPTPVSQR(0.038)
Q92785	232	0.923814	11.403	70.028	H	RYKNRPGLSYHYAHSHLAEEEGEDKEDSQPP	NRPGLSYH(0.003)YAH(0.556)SH(0.924)LAEEEGEDK(0.48)EDSQPPTPVSQR(0.038)
Q92831	524	0.999854	39.62	48.371	H	KKILMWLVGLQNVFSHQLPRMPKEYITRLVF	PNKKILMWLVGLQNVFSH(1)QLPR(1)
Q92922	448	0.999968	45.6729	54.326	H	RSVDLGEDNVTEQTNHIIIPSYASWFDYNCI	SVDLGEDNVTEQTNH(1)IIIPSYASWFDYNCIHVIER
Q92945	138	0.496656	0	41.423	H	LASQGDSISSQLGPIHPPPRTSMTEEYRVPD	LASQGDSISSQLGPIH(0.497)PPPR(0.497)TSMTEEYR(0.007)
Q92997	120	0.851951	8.28377	85.658	H	RTGGIGDSRPPSFHPHAGGGSQENLDNDTET	TGGIGDSR(0.022)PPSFH(0.126)PH(0.852)AGGGSQENLDNDTETDSLVSAQR
Q93009	52	0.999994	52.3841	72.073	H	TQNPVINGNVALSDGHNTAEEDMEDDTSWRS	ITQNPVINGNVALSDGH(1)NTAEEDMEDDTSWR
Q969R8	106	0.945867	14.5905	93.371	H	HLFDLTPAKVLDASGHHETLIGEEQRPVFKQ	VLDASGH(0.946)H(0.033)ETLIGEEQRPVFK(0.021)
Q96AE4	637	1	101.608	101.61	H	QAAYYAQTSPQGMPQHPPAPQGQ________	QQAAYYAQTSPQGMPQH(1)PPAPQGQ
Q96AG3	41	1	75.1608	111.82	H	GAFPARSFSTGSDLGHWVTTPPDIPGSRNLH	SFSTGSDLGH(1)WVTTPPDIPGSR
Q96AT1	49	0.97661	17.4348	71.696	H	ETKRIQPQPPDEDGDHSDKEDEQPQVVVLKK	RIQPQPPDEDGDH(0.977)SDK(0.018)EDEQPQVVVLK(0.005)
Q96AY4	2082	0.704829	3.78011	94.845	H	LATYQENRNTCFSPDHKQPQPGTAGGMRVSV	NTCFSPDH(0.705)K(0.295)QPQPGTAGGMR
Q96BY7	828	0.8674	8.15676	56.529	H	GSFQEEKGDPSIKFFHVSSGVDGDTTSSDDF	FFH(0.867)VSSGVDGDTTSSDDFDWPR(0.133)
Q96BY7	1895	0.925392	10.9105	55.686	H	KKNQLPGILGGVGPMHSLVQLVQGLKDLVWL	K(0.995)NQLPGILGGVGPMH(0.925)SLVQLVQGLK(0.08)
Q96BY7	328	1	73.4535	75.611	H	GQIDSIHLLLSPRQVHLLLDMLAAIAGPENS	QVH(1)LLLDMLAAIAGPENSSK(0.257)IGLANK(0.743)
Q96D71	536	0.988202	21.317	63.606	H	SDPEQIGSNVTRQRSHSGTSPDNTAPPPPPP	SH(0.988)SGTSPDNTAPPPPPPR(0.007)PQPSH(0.003)SR(0.001)
Q96D71	557	0.639391	4.98427	108.69	H	DNTAPPPPPPRPQPSHSRSSSLDMNRTFTVT	SHSGTSPDNTAPPPPPPR(0.203)PQPSH(0.639)SR(0.158)
Q96DN6	123	0.890964	9.16738	49.967	H	VAMATLYRSMETTCSHSSPGEGASPQMFHTV	SMETTCSH(0.891)SSPGEGASPQMFH(0.108)TVSPGPPSAR(0.001)PPCR
Q96DP5	161	0.772822	6.48721	50.255	H	HPSCLPRWRGPAPVIHTVLHGDTVTGVTIMQ	WR(0.054)GPAPVIH(0.773)TVLH(0.174)GDTVTGVTIMQIR(0.999)
Q96DT0	238	0.685649	1.00289	54.457	H	GQVIIVRGLVLQEPKHFTVSLRDQAAHAPVT	H(0.686)FTVSLR(0.6)DQAAH(0.714)APVTLR(0.991)ASFADR(0.009)
Q96DT0	249	0.714218	1.46751	54.457	H	QEPKHFTVSLRDQAAHAPVTLRASFADRTLA	H(0.686)FTVSLR(0.6)DQAAH(0.714)APVTLR(0.991)ASFADR(0.009)
Q96DT5	2797	0.999843	38.0396	92.239	H	QPLIYCHFADRGKDPHYMPVKDWEVLKTILT	DPH(1)YMPVKDWEVLK
Q96DT5	2133	0.88462	8.84625	78.903	H	GDLFPALDVPRRRKLHFEQMVRQSTLELRLQ	R(1)K(1)LH(0.885)FEQMVR(0.115)
Q96E09	42	0.999996	54.3369	65.753	H	GGGGGLRRSNSAPLIHGLSDTSPVFQAEAPS	SNSAPLIH(1)GLSDTSPVFQAEAPSAR
Q96EQ0	6	1	65.2186	65.219	H	__________MSSIKHLVYAVIRFLREQSQM	MSSIK(1)H(1)LVYAVIR(1)
Q96ER9	126	0.817615	6.04408	82.202	H	VARGLVREAREDLEVHQAKLKEVRDRLDRVS	EAR(1)EDLEVH(0.818)QAK(0.916)LK(0.267)
Q96F44	82	1	112.608	132.25	H	PNRPLAKMAEMARRLHPPSPVPQGVCPAHRE	LH(1)PPSPVPQGVCPAHR
Q96GX5	373	1	66.6011	93.381	H	KGFNKKDLELALSPIHNSSALPTTGRSCVNL	DLELALSPIH(1)NSSALPTTGR
Q96HA1	350	0.937583	14.0428	56.442	H	GQENKRRRHDSSGSGHSAFEPLVANGVPASF	H(0.037)DSSGSGH(0.938)SAFEPLVANGVPASFVPK(0.013)PGSLK(0.012)
Q96HE7	255	0.979341	13.7502	44.632	H	LCVEKRAFYRLISGLHASINVHLSARYLLQE	LISGLH(0.979)ASINVH(0.587)LSAR(0.51)YLLQETWLEK(0.923)
Q96HE7	261	0.587222	0.744073	44.632	H	AFYRLISGLHASINVHLSARYLLQETWLEKK	LISGLH(0.979)ASINVH(0.587)LSAR(0.51)YLLQETWLEK(0.923)
Q96HH9	216	0.99997	45.2129	61.109	H	LSRDSTYKLLKSVCGHLENTSVGNSPNPSSA	SVCGH(1)LENTSVGNSPNPSSAENSFR
Q96IF1	262	0.860789	7.91224	127.79	H	GAAGPLERRGAQPGRHSVTGYGDCAVGARYQ	RGAQPGR(0.139)H(0.861)SVTGYGDCAVGAR
Q96IF1	173	0.999498	34.0051	44.254	H	CSNRTSGISMGYDQRHGSPLPAGPCLFGPPL	H(0.999)GSPLPAGPCLFGPPLAGAPAGYSPGGVPSAYPELHAALDR
Q96IF1	229	1	155.628	161.75	H	LYAQRPAGFGCQESRHSYPPALGSPGALAGA	H(1)SYPPALGSPGALAGAGVGAAGPLER
Q96IG2	410	1	76.7245	112.5	H	AGIKRLRTHLPNIKVHAYFAPVTPPPSVGGS	VH(1)AYFAPVTPPPSVGGSR
Q96JK2	82	0.999881	37.4528	60.364	H	QWLVSGGDDRRVLLWHMEQAIHSRVKPIQLK	VLLWH(1)MEQAIH(0.498)SR(0.498)VK(0.005)
Q96JK2	88	0.497766	0	60.364	H	GDDRRVLLWHMEQAIHSRVKPIQLKGEHHSN	VLLWH(1)MEQAIH(0.498)SR(0.498)VK(0.005)
Q96KN7	582	0.984933	17.9266	57.825	H	LKNNRIKQLEGILRSHDLPTSEQLKDVAYGT	SH(0.985)DLPTSEQLK(0.135)DVAYGTR(0.846)PLSLCLETLPAH(0.018)GDEDK(0.016)
Q96KP1	420	0.942269	12.8305	73.212	H	PMLDLDNDTRPSVLGHLSQTASLKRGSSFQS	GNPGLHSPMLDLDNDTR(0.007)PSVLGH(0.942)LSQTASLK(0.049)R(0.002)
Q96MU7	421	0.585331	3.34364	62.099	H	SGKFQGFARLSSESHHGGSPIHWVLPAGMSA	LSSESH(0.143)H(0.585)GGSPIH(0.271)WVLPAGMSAK
Q96MU7	427	0.841666	7.49109	119.77	H	FARLSSESHHGGSPIHWVLPAGMSAKMLGGV	LSSESH(0.003)H(0.15)GGSPIH(0.842)WVLPAGMSAK(0.005)
Q96PN6	78	0.983614	17.7658	54.761	H	YMDRGAEQLVEILNYHISAIVEKVLIFGGDI	FSSAMYMDR(1)GAEQLVEILNYH(0.984)ISAIVEK(0.02)VLIFGGDILK(0.996)
Q96QR8	93	0.999716	38.3211	78.257	H	AVAAEFRDSLGDFIEHYAQLGPSSPEQLAAG	DSLGDFIEH(1)YAQLGPSSPEQLAAGAEEGGGPRR
Q96QT6	596	0.694956	4.45877	70.358	H	WPRPLTPPAAGGLQNHTVGIIVKTENATGPS	QGWPR(0.056)PLTPPAAGGLQNH(0.695)TVGIIVK(0.249)
Q96S59	490	0.969402	14.9939	147.39	H	PVSPRPFSSPSMSPSHGMNIHNLASGKGSTA	SQDSYPVSPR(0.991)PFSSPSMSPSH(0.969)GMNIHNLASGK(0.04)
Q96S66	462	0.979614	21.2706	133.04	H	VPDAEAREHPTVVPSHKSPVLDTKPKETGGI	EHPTVVPSH(0.98)K(0.007)SPVLDTK(0.007)PK(0.006)
Q96SB8	768	0.992074	21.2917	71.279	H	KMVEEHMEQQKENMEHLKSLKIEAENKYDAI	ENMEH(0.992)LK(0.007)SLK(0.001)IEAENK(0.999)
Q9Y458	106	0.999909	40.4177	72.848	H	DIQMELQGSELWKRFHDIGTEMIITKAGRRM	R(1)FH(1)DIGTEMIITK
Q96SN8	1882	0.840435	7.22385	96.455	H	LRKARGNLELRPGGAHPGTCSPSRPGS____	GNLELR(0.159)PGGAH(0.84)PGTCSPSRPGS
Q96SN8	1357	0.978771	18.0549	92.822	H	TYQHLLPESPEPSASHALSDYETSEKSFFSR	IEEDNLTYQH(0.006)LLPESPEPSASH(0.979)ALSDYETSEK(0.015)
Q96ST3	259	0.702383	3.78479	69.639	H	QPPPAKVSKPSQLQAHTPASQQTPPLPPYAS	VSK(0.294)PSQLQAH(0.702)TPASQQTPPLPPYASPR(0.004)
Q96SU4	323	0.784791	5.61892	96.016	H	PKRLIDSSGSASVLTHSSSGNSLKRPDTTES	RLIDSSGSASVLTH(0.785)SSSGNSLK(0.215)
Q96T58	3154	0.997415	26.752	40.837	H	TPQPAPAGVPALASQHPPEEEVHYHLPVARA	ASTPQPAPAGVPALASQH(0.997)PPEEEVH(0.002)YHLPVAR
Q96T58	3000	0.999709	38.0341	48.694	H	HHPPALPSKLPTEVNHVPSGPSIPADRTVSH	LPTEVNH(1)VPSGPSIPADR(0.415)TVSH(0.415)LAAAK(0.119)LDAH(0.045)SPR(0.006)
Q96T58	3015	0.414975	0	48.694	H	HVPSGPSIPADRTVSHLAAAKLDAHSPRPSG	LPTEVNH(1)VPSGPSIPADR(0.415)TVSH(0.415)LAAAK(0.119)LDAH(0.045)SPR(0.006)
Q96T58	1914	0.796642	6.06614	76.492	H	TRRRNVRSVYATMGDHENRSPVKEPVEQPRV	SVYATMGDH(0.797)ENR(0.197)SPVK(0.006)EPVEQPR
Q96TA0	354	0.999994	52.4643	117.86	H	VLKPTFKNFYALVTEHPLDREVRNEYNITIT	PTFKNFYALVTEH(1)PLDR
Q99081	280	1	78.5959	94.564	H	SYGNLHSHDRLSYPPHSVSPTDINTSLPPMS	LSYPPH(1)SVSPTDINTSLPPMSSFHR
Q99459	388	0.999882	39.2975	75.897	H	TNVDTPLKGGLNTPLHESDFSGVTPQRQVVQ	ILQEAQNLMALTNVDTPLK(1)GGLNTPLH(1)ESDFSGVTPQR
Q99466	1094	0.833773	7.59561	46.178	H	FEGPTCSHRAPSCGFHHCHHGGLCLPSPKPG	APSCGFH(0.834)H(0.169)CH(0.173)H(0.833)GGLCLPSPK(0.982)PGFPPR(0.01)
Q99466	1098	0.83338	7.59561	46.178	H	TCSHRAPSCGFHHCHHGGLCLPSPKPGFPPR	APSCGFH(0.834)H(0.169)CH(0.173)H(0.833)GGLCLPSPK(0.982)PGFPPR(0.01)
Q99567	409	0.806714	6.09797	56.335	H	KLHRDPKCPSRYHCTHEAGVHSVGLTWIHKL	YH(0.227)CTH(0.807)EAGVH(0.975)SVGLTWIH(0.278)K(0.471)LH(0.572)K(0.671)
Q99567	414	0.974656	15.06	56.335	H	PKCPSRYHCTHEAGVHSVGLTWIHKLHKFLG	YH(0.227)CTH(0.807)EAGVH(0.975)SVGLTWIH(0.278)K(0.471)LH(0.572)K(0.671)
Q99567	425	0.572237	0.70113	56.335	H	EAGVHSVGLTWIHKLHKFLGSDEEDKDSLQE	YH(0.227)CTH(0.807)EAGVH(0.975)SVGLTWIH(0.278)K(0.471)LH(0.572)K(0.671)
Q99575	464	0.99985	39.6493	44.555	H	AASVHTVGEDTEETPHRWWIETCKKPDSVSL	LIGPLSH(0.479)SILTEAIK(0.508)AASVH(0.013)TVGEDTEETPH(1)R(1)
Q99590	795	0.997835	28.7421	125.51	H	TIDKTKKPRTRRSRFHSPSTTWSPNKDTPQE	SR(0.001)FH(0.998)SPSTTWSPNK(0.001)DTPQEK
Q99638	259	0.618691	2.10659	105.61	H	GRPAIFTIKDSLLDGHFVLATLSDTDSHSQD	DSLLDGH(0.619)FVLATLSDTDSH(0.381)SQDLGSPER
Q99698	2922	0.999993	51.5811	55.337	H	QHIRGMYKVDLSASRHWQELIQQLTHDRAVW	GMYK(1)VDLSASR(1)H(1)WQELIQQLTH(0.979)DR(0.021)
Q99698	2932	0.978597	16.6013	55.337	H	LSASRHWQELIQQLTHDRAVWYDPIYYPTSW	GMYK(1)VDLSASR(1)H(1)WQELIQQLTH(0.979)DR(0.021)
Q99708	148	0.99752	26.0446	50.322	H	KLSEQLQQKIENDQQHQAAELECEEDVIPDS	IENDQQH(0.998)QAAELECEEDVIPDSPITAFSFSGVNR(0.002)
Q99805	152	0.499951	0	52.329	H	QKLEFLKKSMLLNYQHHWIVDNMPVTWCYDV	SMLLNYQH(0.5)H(0.5)WIVDNMPVTWCYDVEDGQR
Q99805	153	0.499951	0	52.329	H	KLEFLKKSMLLNYQHHWIVDNMPVTWCYDVE	SMLLNYQH(0.5)H(0.5)WIVDNMPVTWCYDVEDGQR
Q99996	1165	0.999516	35.6752	93.839	H	LIFAQEEKIKELQKIHQLELQTMKTQETGDE	IK(0.079)ELQK(0.921)IH(1)QLELQTMK
Q9BPZ7	13	0.897604	9.428	102.52	H	___MAFLDNPTIILAHIRQSHVTSDDTGMCE	AFLDNPTIILAH(0.898)IR(0.102)
Q9BQA9	164	1	49.7927	49.793	H	DVEAIAKLITSFLELHCLESPTELSQSSDSE	LITSFLELH(1)CLESPTELSQSSDSEAGDPASQS
Q9BR39	170	0.999999	62.0357	70.008	H	VRSPLRTSLSSLRSEHSNGTVAPDSPASPAS	TSLSSLR(1)SEH(1)SNGTVAPDSPASPASDGPALPSPAIPR
Q9BR76	425	0.999193	31.6473	63.967	H	NVLSDSRPAMAPGSSHLGAPASTTTAADATP	NVLSDSR(0.001)PAMAPGSSH(0.999)LGAPASTTTAADATPSGSLAR
Q9BRD0	269	1	187.618	229	H	RTLGSSDTQQLRRARHDSPDLAPNVTYSLPR	H(1)DSPDLAPNVTYSLPR
Q9BRK4	246	0.998721	30.3807	55.984	H	YSTGGAEPTTSSPGGHLPSHGSGRGALPGPA	NSLSSLPTYSTGGAEPTTSSPGGH(0.999)LPSH(0.001)GSGR
Q9BRR9	392	0.85567	7.63397	83.862	H	SRPESSVDLRGAALAHGRHLSSRRNVLHIRT	PESSVDLR(0.981)GAALAH(0.856)GR(0.163)
Q9BSJ6	19	0.822648	6.93551	61.177	H	RWQNMGTSVRRRSLQHQEQLEDSKELQPVVS	SLQH(0.823)QEQLEDSK(0.167)ELQPVVSH(0.011)QETSVGALGSLCR
Q9BSJ8	818	0.838264	7.14575	140.63	H	YMERAEDLPLRKGTKHLSPYATLTVGDSSHK	H(0.838)LSPYATLTVGDSSHK(0.162)
Q9BTA9	530	1	71.9568	118.76	H	LQRSSSQRSPSPGPNHTSNSSNASNATVVPQ	SPSPGPNH(1)TSNSSNASNATVVPQNSSAR
Q9BU19	118	0.946621	12.4933	53.044	H	PGGQDGGLVWECSAGHTFSWGPSLSPTPSEA	GPGGQDGGLVWECSAGH(0.947)TFSWGPSLSPTPSEAPK(0.053)PASLPHTTR
Q9BUL5	156	0.5	0	71.098	H	DGPKVASPLSPTSLTHTSRPPAALTPVPLSQ	VASPLSPTSLTH(0.5)TSR(0.5)PPAALTPVPLSQGDLSHPPR
Q9BUN5	43	0.977326	16.3451	123.43	H	PVPTSHSGSLALGLPHLPSPKQRAKFKRVGK	RVPVPTSHSGSLALGLPH(0.977)LPSPK(0.023)
Q9BVG8	787	1	111.122	127.92	H	PGLRRAELGSWSSQEHLEWEPACQTPQPSAR	AELGSWSSQEH(1)LEWEPACQTPQPSAR
Q9BVH7	207	0.333334	0	109.07	H	LSQVLPRLKAFMITRHKMLQFDELFKQETGK	AFMITR(0.333)H(0.333)K(0.333)MLQFDELFK(1)
Q9BX40	111	0.876767	8.53127	48.686	H	VQSSLGSASASPFQPHVPYSPFRGMAPYGPL	AQHTLPQDPAIVQSSLGSASASPFQPH(0.877)VPYSPFR(0.123)
Q9BXK5	309	0.5	0	104.98	H	AGEKSENNSSNSDIVHVEKEEVPEGMEEAAV	SENNSSNSDIVH(0.5)VEK(0.5)EEVPEGMEEAAVASVVLPAR
Q9BXT8	1607	0.508343	0	45.152	H	APAPEQIVTLYDDEQHPVHMPLVEMGLADKD	QLYAVSMAPAPEQIVTLYDDEQH(0.508)PVH(0.508)MPLVEMGLADK(0.983)
Q9BXT8	1610	0.508343	0	45.152	H	PEQIVTLYDDEQHPVHMPLVEMGLADKDE__	QLYAVSMAPAPEQIVTLYDDEQH(0.508)PVH(0.508)MPLVEMGLADK(0.983)
Q9BY89	1065	0.7545	6.33244	73.361	H	SLLEHSRKITPPSSPHSLTSTLVSLGHEEAL	K(0.176)ITPPSSPH(0.755)SLTSTLVSLGH(0.001)EEALEMAGSK(0.069)
Q9BYW2	2433	0.819124	6.55969	48.392	H	DPPTWESPGDDASLEHEAEMDLGTPTYDENP	QTQWDPPTWESPGDDASLEH(0.819)EAEMDLGTPTYDENPMK(0.181)
Q9BYX2	388	0.771119	5.26804	43.956	H	GRRVEALEQERESLAHTASLREQQVQELQQH	ESLAH(0.771)TASLR(0.23)EQQVQELQQH(0.999)VQLLMDK(1)
Q9BYX2	403	0.998832	28.1913	43.956	H	HTASLREQQVQELQQHVQLLMDKNHAKQQVI	ESLAH(0.771)TASLR(0.23)EQQVQELQQH(0.999)VQLLMDK(1)
Q9BZF1	60	1	106.193	176.17	H	QRQGKEAYPTPTKDLHQPSLSPASPHSQGFE	DLH(1)QPSLSPASPHSQGFER
Q9BZQ4	243	1	49.5005	49.5	H	VVVPRDAADTDRIMNHSSILRKYKNNIMVVK	DAADTDR(1)IMNH(1)SSILR(1)
Q9C0A6	1134	0.859523	7.86757	111.4	H	SARTPSSPHKKFSPSHSSMSHLEAVSPSDSR	K(0.14)FSPSH(0.86)SSMSHLEAVSPSDSR
Q9C0C2	350	0.98823	19.135	41.287	H	TPSAPSAALPDEGSRHTPSPGLPAEGAPEAP	H(0.988)TPSPGLPAEGAPEAPR(0.95)PSSPPPEVLEPH(0.061)SLDQPPATSPR(0.001)
Q9C0E8	224	0.999584	34.223	100.39	H	ERTVTPALSSNVLPRHLGSPATSVPGMGLHP	H(1)LGSPATSVPGMGLHPPGPPLARPILPR
Q9C0H5	250	0.890227	9.09147	45.14	H	DGPPGVRSRRPSGSQHSPSLQTFAPEADGTI	R(0.11)PSGSQH(0.89)SPSLQTFAPEADGTIFFPER
Q9GZP1	158	0.999996	53.8882	59.189	H	SQDTKAEPLDPEADSHVEVFGDEPEQQLSPI	AEPLDPEADSH(1)VEVFGDEPEQQLSPIFR
Q9GZP8	31	0.255344	0	50.224	H	PGVGAGHGGDPKLSPHKVQGRSEAGAGPGPK	MEFDLGAALEPTSQK(0.013)PGVGAGH(0.221)GGDPK(0.255)LSPH(0.255)K(0.255)
Q9GZV5	88	1	133.139	192.23	H	HPGPRLAGGAQHVRSHSSPASLQLGTGAGAA	SH(1)SSPASLQLGTGAGAAGSPAQQHAHLR
Q9H063	54	0.999879	39.1618	105.46	H	DDKHMFKQFCQEGQPHVLEALSPPQTSGLSP	QFCQEGQPH(1)VLEALSPPQTSGLSPSR
Q9H078	460	0.999984	47.1885	64.346	H	QCPNAVVLFDEVDKAHPDVLTIMLQLFDEGR	AH(1)PDVLTIMLQLFDEGR(0.859)LTDGK(0.141)
Q9H0D2	190	0.968181	14.843	59.155	H	KAFKRQDHLTGHMLTHQKTKPFVCIEQGCSK	RQDHLTGHMLTH(0.968)QK(0.032)
Q9H0W7	23	0.862524	10.0002	49.593	H	AGCATTYNKHINISFHRFPLDPKRRKEWVRL	PTNCAAAGCATTYNK(0.59)H(0.455)INISFH(0.863)R(0.091)FPLDPK(0.001)
Q9H1A4	354	1	96.3359	157.03	H	SRSPSISNMAALSRAHSPALGVHSFSGVQRF	AH(1)SPALGVHSFSGVQR
Q9H1A4	716	0.999174	30.8649	89.723	H	TGSDDDWEYLLNSDYHQNVESHLLNRSLCLS	AR(0.001)PSETGSDDDWEYLLNSDYH(0.999)QNVESHLLNR
Q9H1A4	567	0.999998	58.7524	71.651	H	VLLSPVPELRDSSKLHDSLYNEDCTFQQLGT	LH(1)DSLYNEDCTFQQLGTYIHSIR
Q9H1B7	638	1	50.8929	50.893	H	PMAALMSVADTLGTAHSPKDGSSVHSTTASA	TTPPESAPQNGPSPMAALMSVADTLGTAH(1)SPK(1)
Q9H2Y7	1327	0.972632	15.5071	96.913	H	LRLSFASETPLEKEPHSPADQPEQQAESTLT	LSFASETPLEK(0.027)EPH(0.973)SPADQPEQQAESTLTSAETR
Q9H336	329	0.984696	18.0851	90.444	H	PAGCLDSKAKVIGSVHYEMQSSICRAAIHYG	AK(0.015)VIGSVH(0.985)YEMQSSICR
Q9H3Q1	279	0.999812	37.2565	62.028	H	RQEGKAGPDLPSLPSHALEDEGWAAAAPSPG	AGPDLPSLPSH(1)ALEDEGWAAAAPSPGSAR
Q9H3R5	132	0.993858	25.4773	52.866	H	EKISRQSSVLMDNMKHLLELNKLIMKSQQES	QSSVLMDNMK(0.997)H(0.994)LLELNK(0.005)LIMK(0.005)
Q9H3S7	1128	0.996373	24.3884	73.088	H	GAAAADLLSSSPESQHGGTQSPGGGQPLLQP	GAAAADLLSSSPESQH(0.996)GGTQSPGGGQPLLQPTK(0.004)
Q9H3Z4	18	0.995766	28.3131	112.41	H	DQRQRSLSTSGESLYHVLGLDKNATSDDIKK	SLSTSGESLYH(0.996)VLGLDK(0.001)NATSDDIK(0.001)K(0.001)
Q9H4A3	2006	0.999555	34.6008	152.94	H	AVIPKKEKPELSEPSHLNGPSSDPEAAFLSR	KEKPELSEPSH(1)LNGPSSDPEAAFLSR
Q9H4A3	1296	0.999998	57.0853	61.555	H	TVAASTAQSPGMNLSHSASSLSLQQAFSELR	VFPSEITDTVAASTAQSPGMNLSH(1)SASSLSLQQAFSELR
Q9H4D0	642	0.928646	11.1746	68.401	H	VLQAIEPRITLRGTDHFWRPAAQFESARGVT	GTDH(0.929)FWR(0.071)PAAQFESARGVTLFPDIK
Q9H4K7	262	0.999809	38.4984	44.167	H	ARPAVASYPFTTLKPHVGIVHYEGHLQIAVA	PH(1)VGIVH(0.998)YEGH(0.798)LQIAVADIPGIIR(0.378)GAH(0.749)QNR(0.077)
Q9H4K7	267	0.997595	25.0433	44.167	H	ASYPFTTLKPHVGIVHYEGHLQIAVADIPGI	PH(1)VGIVH(0.998)YEGH(0.798)LQIAVADIPGIIR(0.378)GAH(0.749)QNR(0.077)
Q9H4K7	271	0.798466	4.95711	44.167	H	FTTLKPHVGIVHYEGHLQIAVADIPGIIRGA	PH(1)VGIVH(0.998)YEGH(0.798)LQIAVADIPGIIR(0.378)GAH(0.749)QNR(0.077)
[truncated: 877 more rows]

## Sheet: HeLa cells-filtered sites
Proteins	Positions within proteins	Localization prob	Score diff	Score	Amino acid	Sequence window	Phosphorylation(HKR) Probabilities
Q04695	15	1	170.93	246.75	K	_MTTSIRQFTSSSSIKGSSGLGGGSSRTSCR	QFTSSSSIK(1)GSSGLGGGSSR
Q6DHY5	100	0.995635	25.1838	45.685	K	WEKYKSSRKLIDRAYKGMPMNIRGPMWSVLL	AYK(0.996)GMPMNIR(0.215)GPMWSVLLNIEEMK(0.789)
A0A0C4DH35	84	0.910469	10.1305	71.434	K	GVSWNGSRTHYADSVKGRFIISRDNSRNTLY	GLEWVSGVSWNGSRTH(0.001)YADSVK(0.91)GR(0.088)
A0A0J9YWL9	611	0.965997	14.5511	71.976	K	HQEMVPLGDSNSHSLKKDPVVPQDTAPLMFS	K(0.006)DPMMH(0.992)QEMVPLGDSNSH(0.983)SLK(0.966)K(0.053)
A4D1E1	1171	1	62.8609	62.861	K	DKYKILQLQAQQHMQKQLLSKHLRVLPAAGP	ILQLQAQQH(1)MQK(1)QLLSK(1)
Q13765	144	0.998862	29.4329	102.5	K	EDLSQQAQLAAAEKFKVQGEAVSNIQENTQT	FK(0.999)VQGEAVSNIQENTQTPTVQEESEEEEVDETGVEVK(0.001)
M0R2J8	434	0.998584	28.5027	66.201	K	ITEKVILSMTAKEHHKEQEEVSRLIDELQTA	EH(0.995)H(0.995)K(0.999)EQEEVSR(0.011)LIDELQTAIK
O00273	313	0.992225	21.0592	166.52	K	QQTQSLHSLRSISASKASPPGDLQNPKRARQ	SISASK(0.992)ASPPGDLQNPK(0.008)R
O00308	54	1	79.326	79.326	K	NSYVEVAVDGLPSETKKTGKRIGSSELLWNE	INSYVEVAVDGLPSETK(1)K(1)
O00429	608	0.860556	8.59624	72.009	K	LKTSKAEELLAEEKSKPIPIMPASPQKGHAV	SK(0.861)PIPIMPASPQK(0.119)GH(0.021)AVNLLDVPVPVAR
O00499	330	0.999908	40.3749	132.8	K	EPEPAGGATPGATLPKSPSQLRKGPPVPPPP	VNHEPEPAGGATPGATLPK(1)SPSQLR
O00559	34	0.999991	50.6302	111.65	K	FSFLKRLICRSGRGRKLSGDQITLPTTVDYS	K(1)LSGDQITLPTTVDYSSVPK
O00567	510	0.915116	10.357	145.73	K	GMEDPSISFSKPKKKKSFSKEELMSSDLEET	K(0.915)SFSK(0.084)EELMSSDLEETAGSTSIPK(0.001)
O00567	514	0.999951	43.1066	123.17	K	PSISFSKPKKKKSFSKEELMSSDLEETAGST	SFSK(1)EELMSSDLEETAGSTSIPK
O00592	526	0.999957	43.7094	108.51	K	PTLEVMETSSEMQEKKVVSLNGELGDSWIVP	K(1)VVSLNGELGDSWIVPLDNLTKDDLDEEEDTHL
O00592	547	0.9611	13.9283	81.001	K	GELGDSWIVPLDNLTKDDLDEEEDTHL____	K(0.039)VVSLNGELGDSWIVPLDNLTK(0.961)DDLDEEEDTHL
O00712	318	0.846449	7.41541	287.88	K	WHERDQDMSSPTTMKKPEKPLFSSASPQDSS	K(0.846)PEK(0.153)PLFSSASPQDSSPR
O14497	1938	1	63.7546	134.24	K	TEDGAKSSEAIKESSKFPFGISPAQSHRNIK	ESSK(1)FPFGISPAQSHR
O14770	197	0.898503	9.47067	81.553	K	KMPIDLVIDERDGSSKSDHEELSGSSTNLAD	DGSSK(0.899)SDH(0.101)EELSGSSTNLADHNPSSWR
O14802	954	0.966911	14.657	89.44	K	ALSKNELILTTESIMKKSEFLCCQDSFLQEI	NELILTTESIMK(0.967)K(0.033)
O14893	79	0.999995	52.9345	59.694	K	PDVVVAQIDPKKLKRKQSVNISLSGCQPAPE	K(1)QSVNISLSGCQPAPEGYSPTLQWQQQQVAQFSTVR
O14974	442	0.997039	25.2725	145.94	K	ERKDESPATWRLGLRKTGSYGALAEITASKE	K(0.997)TGSYGALAEITASK(0.003)
O14974	879	0.783301	5.58075	70.346	K	ENEQEQQSDTEEGSNKKETQTDSISRYETSS	STGVSFWTQDSDENEQEQQSDTEEGSNK(0.783)K(0.217)ETQTDSISR
O15014	794	0.937564	11.7657	102.65	K	DPHQSRLASIKAEADKIYSFTDNAPSPSIGG	AEADK(0.938)IYSFTDNAPSPSIGGSSR(0.062)
O15027	72	0.999998	56.2387	91.269	K	FSRQALQSTPLGSSSKSSPPVLQGPAPAGFS	QALQSTPLGSSSK(1)SSPPVLQGPAPAGFSQHPGLLVPHTHAR
O15056	1121	1	63.2861	107.92	K	QPPQRPPPPTGLMVKKSASDASISSGTHGQY	K(1)SASDASISSGTHGQYSILQTAR
O15066	596	1	90.075	94.692	K	KLKHLIIENFIPLEEKSKIMNRAFFDEEEDH	HLIIENFIPLEEK(1)SK(1)
O15075	306	1	120.863	164.41	K	SRRSTTKSPGPSRRSKSPASTSSVNGTPGSQ	SK(1)SPASTSSVNGTPGSQLSTPR
O15085	561	0.99297	21.5064	79.845	K	SSQSTFHIPLSPVEVKPGNVRNIIQHFENNQ	SSSQSTFH(0.007)IPLSPVEVK(0.993)PGNVR
O15164	810	1	91.0387	172.32	K	DNSSNGKSEWLDPSQKSPLHVGETRKEDDPN	SEWLDPSQK(1)SPLHVGETR
O15212	7	0.999999	60.6291	104.22	K	_________MAELIQKKLQGEVEKYQQLQKD	MAELIQK(1)K(1)LQGEVEK
O15212	8	0.999999	61.2747	104.22	K	________MAELIQKKLQGEVEKYQQLQKDL	MAELIQK(1)K(1)LQGEVEK
O15446	21	1	121.105	176.28	K	AGDAARFSCPPNFTAKPPASESPRFSLEALT	FSCPPNFTAK(1)PPASESPR
O15541	9	0.988842	19.4755	91.889	K	_______MAEQLSPGKAVDQVCTFLFKKPGR	AEQLSPGK(0.989)AVDQVCTFLFK(0.011)
O43159	169	0.999909	40.3899	95.122	K	TGPKAWKGSTTNDPPKQSPGSTSPKPPHTLS	GSTTNDPPK(1)QSPGSTSPKPPHTLSR
O43159	178	1	108.404	144.4	K	TTNDPPKQSPGSTSPKPPHTLSRKQWRNRQK	QSPGSTSPK(1)PPHTLSR
O43166	1445	0.932636	10.7828	80.816	K	HSASPVVFTSARSSPKEELHPAAPSQLAPSF	H(0.195)SASPVVFTSAR(0.94)SSPK(0.933)EELH(0.933)PAAPSQLAPSFSSSSSSSSGPR
O43169	39	0.912942	10.2063	88.101	K	VTYYRLEEVAKRNSLKELWLVIHGRVYDVTR	R(0.087)NSLK(0.913)ELWLVIHGR
O43294	134	0.999371	32.0143	121.24	K	KVASGEQKEDQSEDKKRPSLPSSPSPGLPKA	K(0.999)RPSLPSSPSPGLPK(0.001)
O43294	70	1	123.731	123.76	K	DKDHLYSTVCKPRSPKPAAPAAPPFSSSSGV	SPK(1)PAAPAAPPFSSSSGVLGTGLCELDR
O43353	328	0.947191	12.5796	76.006	K	KLQSVSSAIHLCDKKKMELSLNIPVNHGPQE	K(0.947)MELSLNIPVNH(0.052)GPQEESCGSSQLH(0.001)ENSGSPETSR
O43474	252	0.987345	18.9307	50.224	K	APGSEYGSPSVISVSKGSPDGSHPVVVAPYN	ASLSAPGSEYGSPSVISVSK(0.987)GSPDGSH(0.013)PVVVAPYNGGPPR
O43491	601	0.845089	7.3744	127.3	K	VVQDGDGRREVRSPTKAPHLQLIEGKKNSLR	EVRSPTK(0.845)APHLQLIEGK(0.155)
O43688	264	0.999998	58.9237	79.163	K	ARPPQHCLKEEELERKPSLSLTLTLGEADHN	K(1)PSLSLTLTLGEADHNHYGYPHSSS
O43815	131	0.999777	36.5176	84.285	K	YHKLKYGTELNQGDMKPPSYDSDEGNETEVQ	YGTELNQGDMK(1)PPSYDSDEGNETEVQPQQNSQLMWK
O60264	112	1	72.3189	127.59	K	KQTELFAHFIQPAAQKTPTSPLKMKPGRPRI	QTELFAHFIQPAAQK(1)TPTSPLK(1)
O60271	338	0.786969	6.85415	53.522	K	QETRNVSTGSAENEEKSEVQAIIESTPELDM	NVSTGSAENEEK(0.787)SEVQAIIESTPELDMDK(0.051)DLSGYK(0.162)
O60293	643	0.999995	53.2799	73.461	K	LREELLKSLANKRAFKPEETSSNSDPPSPPV	AFK(1)PEETSSNSDPPSPPVLNNSHPVPR
O60318	520	0.904896	10.1669	85.407	K	KKISPNKKPFSLKEKKPGDGEVSPSTEDAPF	K(0.905)PGDGEVSPSTEDAPFQH(0.008)SPLGK(0.087)
O60341	150	1	89.2727	95.293	K	YYSEEERNAKAEKEKKLPPPPPQAPPEEENE	K(1)LPPPPPQAPPEEENESEPEEPSGVEGAAFQSR
O60499	131	0.8093	6.27777	65.155	K	ERNNREILAGKPAAQKSPSDLLDASAVSATS	EILAGK(0.191)PAAQK(0.809)SPSDLLDASAVSATSR
O60508	47	0.997046	27.7695	48.244	K	PAADSLMHLTKSPSSKPSLAVAVDSAPEVAV	SPSSK(0.997)PSLAVAVDSAPEVAVK(0.001)EDLETGVHLDPAVK(0.002)
O60524	768	0.999961	44.3871	59.598	K	EYEEVRKDQDSVGEMKDEGEETLNYPDTTID	DQDSVGEMK(1)DEGEETLNYPDTTIDLSHLQPQR
O60706	1075	0.998952	29.7901	65.5	K	MGLTAAKNLHHNLLNKIILGPIRFFDTTPLG	NLH(1)H(1)NLLNK(0.999)IILGPIR(0.001)
O60832	20	0.995169	23.3115	102.72	K	EVIILPKKHKKKKERKSLPEEDVAEIQHAEE	K(0.995)SLPEEDVAEIQHAEEFLIKPESK(0.005)
O60934	435	0.999473	32.7804	154.13	K	TLAKMRIPNYQLSPTKLPSINKSKDRASQQQ	IPNYQLSPTK(0.999)LPSINK(0.001)
O75128	454	0.898389	9.46789	97.366	K	CSDQDLAGTPDLGPQKSPLWEKNGSENSHLR	DKWATDQEDCSDQDLAGTPDLGPQK(0.898)SPLWEK(0.102)
O75152	764	0.99944	34.0011	152.01	K	QMSMKTRRLSSASTGKPPLSVEDDFEKLIWE	RLSSASTGK(0.999)PPLSVEDDFEK
O75152	114	0.899766	9.53114	78.975	K	KTVLPTVPESPEEEVKASQLSVQQNKLSVQS	TVLPTVPESPEEEVK(0.9)ASQLSVQQNK(0.1)
O75167	558	0.999999	61.6653	137.95	K	EEQEAKMELKRRLSRKLSLRPTVAELQARRI	K(1)LSLRPTVAELQAR
O75182	1011	0.999997	55.6277	79.021	K	GTEGASSSPTEGFLLKPVFLQRNLKKFRRRW	YVEQYVGTEGASSSPTEGFLLK(1)PVFLQR
O75324	57	0.959341	13.7282	58.998	K	SQSEDEESIVGDGETKEPFLLVQYSAKGPCV	ISQSEDEESIVGDGETK(0.959)EPFLLVQYSAK(0.041)
O75367	134	0.972572	15.5545	167.03	K	GSKGKLEAIITPPPAKKAKSPSQKKPVSKKA	GKLEAIITPPPAK(0.973)K(0.027)
O75369	504	0.999253	31.2619	81.379	K	VTMKGPKGLEELVKQKDFLDGVYAFEYYPST	QK(0.999)DFLDGVYAFEYYPSTPGR(0.001)
O75376	2336	0.999763	36.258	94.003	K	VCKPKLISKSNSRKSKSPIPGQGYLGTERPS	SK(1)SPIPGQGYLGTERPSSVSSVHSEGDYHR
O75376	998	0.97994	16.8821	67.353	K	IDLECRSSTSPCGTSKSPNREWEVLQPAPHQ	SSTSPCGTSK(0.98)SPNR(0.998)EWEVLQPAPH(0.022)QVITNLPEGVR
O75420	391	1	65.3464	69.095	K	GPLWGTNGDGDETAEKEPPAAEDDIRGIQLS	SSSPSPLPTLGPLWGTNGDGDETAEK(1)EPPAAEDDIR
O75446	129	1	97.6042	103.05	K	YHKNLIQSVRNRRKRKGSDDDGGDSPVQDID	K(1)GSDDDGGDSPVQDIDTPEVDLYQLQVNTLR
O75475	175	0.99691	25.0872	106	K	EEAGVVTTATASVNLKVSPKRGRPAATEVKI	QVETEEAGVVTTATASVNLK(0.997)VSPK(0.003)
O75530	268	0.999941	42.5239	68.536	K	SCGMDHSLKLWRINSKRMMNAIKESYDYNPN	INSK(1)R(1)MMNAIK
O75533	214	1	116.687	222.64	K	RWDQTADQTPGATPKKLSSWDQAETPGHTPS	K(1)LSSWDQAETPGHTPSLR
O75533	430	1	92.9108	140.41	K	LPPPAGYVPIRTPARKLTATPTPLGGMTGFH	K(1)LTATPTPLGGMTGFHMQTEDR
O75533	141	0.999878	39.063	92.39	K	MIISPERLDPFADGGKTPDPKMNARTYMDVM	TMIISPER(0.015)LDPFADGGK(1)TPDPK(0.985)
O75665	662	0.999365	32.0086	71.894	K	KAFRSYHRRVIKNSAKSPLAAKSPPSLHLLE	NSAK(0.999)SPLAAK(0.998)SPPSLHLLEAFK(0.003)
O75665	668	0.997526	26.1459	101.48	K	HRRVIKNSAKSPLAAKSPPSLHLLEAFKNIT	NSAK(0.999)SPLAAK(0.998)SPPSLHLLEAFK(0.003)
O75717	321	0.972709	15.5197	105.98	K	PSGKTSSSKVSSRVEKDYNDLFDGDDMSNAG	VEK(0.973)DYNDLFDGDDMSNAGDFLNDNAVEIPSFSK(0.027)
O75953	35	0.831635	8.06682	85.271	K	IKKAYRKMALKYHPDKNKEPNAEEKFKEIAE	YH(0.13)PDK(0.832)NK(0.039)EPNAEEK
O75970	785	0.767613	5.18931	86.699	K	ALKGAPSGTVRIGVAKPLPLSPEEGYVSAKE	IGVAK(0.768)PLPLSPEEGYVSAK(0.232)
O75970	1582	1	131.511	271.82	K	SQAVPSAAGAASGEKKNSSQSLMVPQSGSPE	K(1)NSSQSLMVPQSGSPEPESIR
O94776	533	0.785038	5.62531	142.19	K	ATIVKDLVAQAPLKPKTPRGTKTPINRNQLS	DLVAQAPLK(0.215)PK(0.785)TPR
O94823	1035	1	64.0782	84.169	K	QYCRSVLCCRSTPLQKSMIVKLVRDKLRVMT	STPLQK(1)SMIVK(0.002)LVR(0.998)
O94854	754	0.999718	35.5054	76.02	K	FHRNFPEQVFQDLQRKSPESEILSLHLLVEE	K(1)SPESEILSLHLLVEELR
O94876	379	0.905266	9.80272	126.83	K	AVVSKPREIASLIRNKFGSADNIPNLKDSLE	NK(0.905)FGSADNIPNLK(0.095)
O94876	390	0.926109	11.5418	89.866	K	LIRNKFGSADNIPNLKDSLEEGQVDDAGKAL	NK(0.065)FGSADNIPNLK(0.926)DSLEEGQVDDAGK(0.009)
O94880	798	1	67.403	72.25	K	DMEADMAMETLPDGTKRSRRQIKEPVKFVPQ	NSYWQCSECDQAGSSDMEADMAMETLPDGTK(1)R
O94885	323	0.923495	10.8175	73.691	K	SGVHKKPLFFDGSPEKPPEDDSDSLTTSPSS	K(0.077)PLFFDGSPEK(0.923)PPEDDSDSLTTSPSSSSLDTWGAGR
O94964	1314	0.895425	9.32602	115.69	K	GRAPSPTSSAGEEGTKKPEPLSPASYHQPEG	APSPTSSAGEEGTK(0.895)K(0.105)PEPLSPASYHQPEGVAR
O95155	794	0.989745	19.8459	180.1	K	RLRAIRELNRTVEDLKNNESQWKDSPLATRH	TVEDLK(0.99)NNESQWK(0.01)DSPLATR
O95239	818	1	97.2191	103.31	K	TEVRGQVSESEDSITKQIESLETEMEFRSAQ	GQVSESEDSITK(1)QIESLETEMEFR
O95239	1141	0.996495	24.5382	78.043	K	SLGTVERTQDSEGSFKLEDPTEVTPGLSFFN	TQDSEGSFK(0.996)LEDPTEVTPGLSFFNPVCATPNSK(0.004)
O95263	745	0.994921	22.9201	59.732	K	TKHFEHVNKFVNSINKPMAAEIEGSDCECNP	FVNSINK(0.995)PMAAEIEGSDCECNPAGK(0.005)
O95359	2361	0.993094	21.5778	58.342	K	NFNPFSSTSKMQESPKLPQQSYNFDPDTCDE	MQESPK(0.993)LPQQSYNFDPDTCDESVDPFK(0.007)
O95361	73	0.999997	57.2838	65.151	K	QDSDSAEQGDPAGEGKEVLCDFCLDDTRRVK	ETEEQDSDSAEQGDPAGEGK(1)EVLCDFCLDDTRR
O95365	346	0.761722	7.85287	96.135	K	GAAAGDSDEESRADDKGVMDYYLKYFSGAHD	AGAAAGDSDEESR(0.113)ADDK(0.762)GVMDYYLK(0.125)
O95382	960	0.977383	16.4033	133.92	K	FPCPQAPSQHPPSPPKRCLSYGGTSQLRVPE	PSDAPSASPTPSANSTTQSQTFPCPQAPSQH(0.022)PPSPPK(0.977)R
O95470	566	0.999815	37.3311	62.16	K	STDTVTQGSQMNGSPKPH_____________	NMVAELSSVFLDSLYSTDTVTQGSQMNGSPK(1)PH
O95714	2937	0.999934	41.8185	117.52	K	AVPFLASDNEEEEDEKGNSGSLIRKKAAGLE	IRAEEEDLAAVPFLASDNEEEEDEK(1)GNSGSLIR
O95714	2452	1	90.1818	98.376	K	PVAVQHIRPARVKRRKQSPVPALPIVVQLME	K(1)QSPVPALPIVVQLMEMGFSR
O95718	423	1	69.6504	69.65	K	QHFYSVKLQGKVPMHKLFLEMLEAKV_____	VPMH(1)K(1)LFLEMLEAK(1)V
O95718	432	1	69.6504	69.65	K	GKVPMHKLFLEMLEAKV______________	VPMH(1)K(1)LFLEMLEAK(1)V
O95747	330	0.998638	31.228	144.18	K	AKKVRRVPGSSGRLHKTEDGGWEWSDDEFDE	LH(0.001)K(0.999)TEDGGWEWSDDEFDEESEEGK(0.001)AAISQLR
O95785	1139	0.891509	9.14731	103.42	K	EARSPSDLHISPLAKKLPPPPGSPLGHSPTA	K(0.892)LPPPPGSPLGH(0.108)SPTASPPPTAR
O95785	939	0.999998	56.0387	103.75	K	HLGLPPGLAKKSSSLKEVVAGAPRPGLLSLA	SSSLK(1)EVVAGAPRPGLLSLAK
O95810	291	1	103.434	187.63	K	TSNHQKISSGKSSPFKVSPLTFGRKKVREGE	SSPFK(1)VSPLTFGR
O95817	409	0.914045	11.3956	58.929	K	ERAAPSTAPAEATPPKPGEAEAPPKHPGVLK	AAPSTAPAEATPPK(0.914)PGEAEAPPK(0.066)HPGVLK(0.02)
O96013	177	0.865716	8.10544	132.76	K	SSREGSGGPQESSRDKRPLSGPDVGTPQPAG	DK(0.866)RPLSGPDVGTPQPAGLASGAK(0.134)
O96013	473	0.992564	21.254	172.42	K	DFGFCAQVSKEVPRRKSLVGTPYWMAPELIS	R(0.007)K(0.993)SLVGTPYWMAPELISR
O96028	118	0.761175	5.03405	118.71	K	QEMKGIGTPPNTTPIKNGSPEIKLKITKTYM	GIGTPPNTTPIK(0.761)NGSPEIK(0.239)
P00441	92	0.999992	52.4254	102.47	K	DEERHVGDLGNVTADKDGVADVSIEDSVISL	HVGDLGNVTADK(1)DGVADVSIEDSVISLSGDHCIIGR
P01106	52	1	67.2376	111.88	K	QSELQPPAPSEDIWKKFELLPTPPLSPSRRS	K(1)FELLPTPPLSPSR(0.593)R(0.407)
P02545	457	0.997621	26.2263	131.42	K	VEEVDEEGKFVRLRNKSNEDQSMGNWQIKRQ	NK(0.998)SNEDQSMGNWQIK(0.002)R
P04150	206	0.999983	47.7643	56.234	K	FDILQDLEFSSGSPGKETNESPWRSDLLIDE	LYTTDQSTFDILQDLEFSSGSPGK(1)ETNESPWR
P06746	81	0.978956	16.6764	127.51	K	GTKIAEKIDEFLATGKLRKLEKIRQDDTSSS	IAEKIDEFLATGK(0.979)LR(0.021)
P08237	656	0.974126	15.7584	85.737	K	FNLYSEEGKGIFDSRKNVLGHMQQGGSPTPF	K(0.974)NVLGH(0.026)MQQGGSPTPFDR
P08670	334	1	90.2932	148.41	K	YRRQVQSLTCEVDALKGTNESLERQMREMEE	QVQSLTCEVDALK(1)GTNESLER
P08865	42	0.995277	23.2505	134.18	K	GTNLDFQMEQYIYKRKSDGIYIINLKRTWEK	RK(0.995)SDGIYIINLK(0.005)
P09210	4	0.999599	35.0622	69.03	K	____________MAEKPKLHYSNIRGRMESI	MAEK(1)PK(0.999)LH(0.001)YSNIR
P09210	6	0.999424	33.436	69.03	K	__________MAEKPKLHYSNIRGRMESIRW	MAEK(1)PK(0.999)LH(0.001)YSNIR
P09601	226	0.987596	20.3607	77.838	K	IQLFEELQELLTHDTKDQSPSRAPGLRQRAS	TAFLLNIQLFEELQELLTH(0.009)DTK(0.988)DQSPSR(0.003)
P09651	350	1	114.003	126.56	K	GRSSGPYGGGGQYFAKPRNQGGYGGSSSSSS	SSGPYGGGGQYFAK(1)PR
P09661	179	0.998586	30.9075	114.76	K	GKRGAQLAKDIARRSKTFNPGAGLPTDKKKG	SK(0.999)TFNPGAGLPTDK(0.001)K(0.001)
P0DMV9	361	0.991731	20.7896	59.661	K	VQKLLQDFFNGRDLNKSINPDEAVAYGAAVQ	DLNK(0.992)SINPDEAVAYGAAVQAAILMGDK(0.008)
P11142	328	0.999909	40.4313	110.37	K	TLDPVEKALRDAKLDKSQIHDIVLVGGSTRI	LDK(1)SQIHDIVLVGGSTR
P11717	2358	0.999999	61.1526	77.649	K	CRRSSNVSYKYSKVNKEEETDENETEWLMEE	VNK(1)EEETDENETEWLMEEIQLPPPR
P12544	123	1	84.2968	100.82	K	PATREGDLKLLQLMEKAKINKYVTILHLPKK	EGDLKLLQLMEK(1)AK(1)
P12694	356	1	125.463	173.51	K	DSSAYRSVDEVNYWDKQDHPISRLRHYLLSQ	SVDEVNYWDK(1)QDHPISR
P14866	302	0.994686	22.723	60.641	K	NPNLSGQGDPGSNPNKRQRQPPLLGDHPAEY	NDQDTWDYTNPNLSGQGDPGSNPNK(0.995)R(0.005)
P14923	662	0.999617	34.1623	198.29	K	AVLFRISEDKNPDYRKRVSVELTNSLFKHDP	K(1)RVSVELTNSLFK
P15260	439	0.999995	53.1275	81.239	K	SLSDSEFPPNNKGEIKTEGQELITVIKAPTS	GEIK(1)TEGQELITVIK
P15822	2674	0.999689	35.7917	186.42	K	STSQPLLKAHSEVFTKPSGQQTLSPDRQVPR	AHSEVFTK(1)PSGQQTLSPDR
P15822	870	0.999942	43.7178	53.522	K	IPPPHPLRGSQSFDDKIGAFYDDVFVSGPNA	GSQSFDDK(1)IGAFYDDVFVSGPNAPVPQSGHPR
P15880	263	0.964112	14.2922	83.137	K	YSYLTPDLWKETVFTKSPYQEFTDHLVKTHT	ETVFTK(0.964)SPYQEFTDHLVK(0.036)
P15880	76	0.839597	7.18857	108.72	K	MPVTKLGRLVKDMKIKSLEEIYLFSLPIKES	IK(0.84)SLEEIYLFSLPIK(0.16)
P16070	705	0.992857	21.8484	147.64	K	AVEDRKPSGLNGEASKSQEMVHLVNKESSET	K(0.006)PSGLNGEASK(0.993)SQEMVHLVNK(0.001)
P16070	715	0.954303	13.1993	65.155	K	NGEASKSQEMVHLVNKESSETPDQFMTADET	SQEMVH(0.046)LVNK(0.954)ESSETPDQFMTADETR
P17096	31	0.996958	24.577	116.87	K	QEKDGTEKRGRGRPRKQPPVSPGTALVGSQK	K(0.997)QPPVSPGTALVGSQK(0.127)EPSEVPTPK(0.876)
P17544	406	0.999953	43.2822	119.7	K	LLLAHKDCPVTALQKKTQGYLESPKESSEPT	K(1)TQGYLESPK(1)ESSEPTGSPAPVIQHSSATAPSNGLSVR
P17544	415	0.999956	43.5835	95.507	K	VTALQKKTQGYLESPKESSEPTGSPAPVIQH	TQGYLESPK(1)ESSEPTGSPAPVIQHSSATAPSNGLSVR
P17706	290	0.750103	6.3503	140.75	K	GAKCIKGDSSIQKRWKELSKEDLSPAFDHSP	WK(0.75)ELSK(0.073)EDLSPAFDH(0.003)SPNK(0.174)
P17812	584	1	160.456	169.06	K	DRSGSSSPDSEITELKFPSINHD________	SGSSSPDSEITELK(1)FPSINHD
P18206	720	0.839035	9.83775	80.41	K	NVEKMTGLVDEAIDTKSLLDASEEAIKKDLD	MTGLVDEAIDTK(0.839)SLLDASEEAIK(0.087)K(0.074)
P18206	326	1	77.599	85.496	K	ELCAGKERREILGTCKMLGQMTDQVADLRAR	R(1)EILGTCK(1)MLGQMTDQVADLR
P18583	2125	0.758737	5.24992	102.21	K	KQIAQSKEDDDVIVNKPHVSDEEEEEPPFYH	QIAQSK(0.014)EDDDVIVNK(0.759)PH(0.227)VSDEEEEEPPFYHHPFK
P18583	157	1	71.8791	150.14	K	SHDDGNIDLESDSFLKFDSEPSAVALELPTR	SHDDGNIDLESDSFLK(1)FDSEPSAVALELPTR
P18858	54	0.999842	41.0217	115.26	K	LKEWNGVVSESDSPVKRPGRKAARVLGSEGE	EWNGVVSESDSPVK(1)RPGR
P18858	82	0.997247	25.5682	52.381	K	EGEEEDEALSPAKGQKPALDCSQVSPPRPAT	GQK(0.997)PALDCSQVSPPR(0.995)PATSPENNASLSDTSPMDSSPSGIPK(0.008)
P19022	802	0.999665	34.7444	64.645	K	LSQLQQPDTVEPDAIKPVGIRRMDERPIHAE	YDEEGGGEEDQDYDLSQLQQPDTVEPDAIK(1)PVGIR
P19484	116	0.99762	26.9143	82.367	K	GNKFAAHISPAQGSPKPPPAASPGVRAGHVL	FAAH(0.002)ISPAQGSPK(0.998)PPPAASPGVR
P19525	80	1	71.2477	72.035	K	NAAAKLAVEILNKEKKAVSPLLLTTTNSSEG	K(1)AVSPLLLTTTNSSEGLSMGNYIGLINR
P19634	690	0.999041	30.1771	162.76	K	QLEQKINNYLTVPAHKLDSPTMSRARIGSDP	INNYLTVPAH(0.001)K(0.999)LDSPTMSR
P19838	935	0.980924	17.1115	91.065	K	DSDSVCDSGVETSFRKLSFTESLTSGASLLT	K(0.981)LSFTESLTSGASLLTLNK(0.019)
P20020	19	0.99998	47.0661	110.77	K	MANNSVAYSGVKNSLKEANHDGDFGITLAEL	NSLK(1)EANHDGDFGITLAELR
P20020	1185	0.975305	15.8886	61.116	K	DAPTKRNSSPPPSPNKNNNAVDSGIHLTIEM	NSSPPPSPNK(0.975)NNNAVDSGIH(0.042)LTIEMNK(0.983)
P20042	63	0.859108	8.65723	178.03	K	PTEDKDLEADEEDTRKKDASDDLDDLNFFNQ	K(0.859)K(0.117)DASDDLDDLNFFNQK(0.024)
P20810	565	0.999816	37.3425	103.71	K	TTQAGAPPRDTSQSDKDLDDALDKLSDSLGQ	DTSQSDK(1)DLDDALDKLSDSLGQR
P21580	643	0.999816	37.3495	166.7	K	FIEYRENKHFAAASGKVSPTASRFQNTIPCL	HFAAASGK(1)VSPTASR
P22234	30	0.84527	8.02813	148.18	K	EGKTKEVYELLDSPGKVLLQSKDQITAGNAA	TK(0.022)EVYELLDSPGK(0.845)VLLQSK(0.133)
P22314	18	0.948237	13.1346	80.554	K	SSPLSKKRRVSGPDPKPGSNCSPAQSVLSEV	R(0.046)VSGPDPK(0.948)PGSNCSPAQSVLSEVPSVPTNGMAK(0.006)
P23396	202	0.94276	14.2696	108.28	K	KIMLPWDPTGKIGPKKPLPDHVSIVEPKDEI	K(0.943)PLPDHVSIVEPK(0.035)DEILPTTPISEQK(0.022)
P23443	450	1	95.4647	115.09	K	PRRFIGSPRTPVSPVKFSPGDFWGRGASAST	TPVSPVK(1)FSPGDFWGR
P23497	366	0.99989	39.6185	70.264	K	EPVINNDNPLESNDEKEGQEATCSRPQIVPE	SEPVINNDNPLESNDEK(1)EGQEATCSRPQIVPEPMDFR
P23588	113	0.999999	61.9603	64.592	K	AFLGNLPYDVTEESIKEFFRGLNISAVRLPR	SPPYTAFLGNLPYDVTEESIK(1)EFFR
P24534	7	0.999887	39.4626	104.49	K	_________MGFGDLKSPAGLQVLNDYLADK	GFGDLK(1)SPAGLQVLNDYLADK
P25054	993	0.879424	8.65248	66.825	K	QMKPSIESYSEDDESKFCSYGQYPADLAHKI	GQMK(0.001)PSIESYSEDDESK(0.879)FCSYGQYPADLAHK(0.12)
P25054	1777	0.967995	14.8066	203.2	K	KNQLDGKKKKPTSPVKPIPQNTEYRTRVRKN	K(0.032)PTSPVK(0.968)PIPQNTEYR
P25054	1370	0.998042	27.0737	108.96	K	SSGAKSPSKSGAQTPKSPPEHYVQETPLMFS	SGAQTPK(0.998)SPPEH(0.002)YVQETPLMFSR
P25440	282	1	54.1058	85.274	K	APPAQPLAKKKGVKRKADTTTPTPTAILAPG	K(1)ADTTTPTPTAILAPGSPASPPGSLEPK(1)
P26358	130	0.915111	10.3262	290.37	K	SEARRVGMADANSPPKPLSKPRTPRRSKSDG	VGMADANSPPK(0.915)PLSK(0.085)PR
P27816	361	0.999936	41.9616	237.59	K	KDVTLLKETERASPIKMDLAPSKDMGPPKEN	ETERASPIK(1)MDLAPSK
P28290	648	0.946516	12.479	84.404	K	TVELLREASAESDVGKSSESEFTQYTTHHIL	EASAESDVGK(0.947)SSESEFTQYTTHHILK(0.053)
P28290	464	0.980666	19.5778	62.183	K	APLTIPSIRNIMTQQKDSFEMEEVQSTEGEA	NIMTQQK(0.981)DSFEMEEVQSTEGEAPH(0.009)VPATYQLGLTK(0.011)
P28290	445	0.973599	15.6676	118.96	K	ENSSELKSVHISTPEKEPCAPLTIPSIRNIM	SVH(0.026)ISTPEK(0.974)EPCAPLTIPSIR
P28370	115	0.999994	51.96	147.56	K	KQTELFAHFIQPSAQKSPTSPLNMKLGRPRI	QTELFAHFIQPSAQK(1)SPTSPLNMK(1)
P31944	199	1	65.7703	78.692	K	GSCFIQTLVDVFTKRKGHILELLTEVTRRMA	K(1)GH(1)ILELLTEVTR
P32455	155	0.999999	58.3976	60.093	K	DQLYYVTELTHRIRSKSSPDENENEVEDSAD	SK(1)SSPDENENEVEDSADFVSFFPDFVWTLR
P33981	434	0.998361	27.8479	140.27	K	EQKHTTFEQPVFSVSKQSPPISTSKWFDPKS	HTTFEQPVFSVSK(0.998)QSPPISTSK(0.002)
P35222	672	1	78.3312	186.76	K	AVLFRMSEDKPQDYKKRLSVELTSSLFRTEP	K(1)RLSVELTSSLFR
P35251	153	0.999999	59.3761	66.294	K	TSNMKKNEENTKTKNKPLSPIKLTPTSVLDY	NK(1)PLSPIK(1)LTPTSVLDYFGTGSVQR
P35251	159	0.999997	55.5417	134.09	K	NEENTKTKNKPLSPIKLTPTSVLDYFGTGSV	NK(1)PLSPIK(1)LTPTSVLDYFGTGSVQR
P35579	1145	1	64.6653	106.12	K	AEKQKRDLGEELEALKTELEDTLDSTAAQQE	DLGEELEALK(1)TELEDTLDSTAAQQELR
P35606	856	0.999992	53.5807	193.31	K	DFQPSRSTAQQELDGKPASPTPVIVASHTAN	STAQQELDGK(1)PASPTPVIVASHTANKEEK
P35658	665	1	70.4974	140.27	K	RSAQGSSSPVPSMVQKSPRITPPAAKPGSPQ	SAQGSSSPVPSMVQK(1)SPR
P38159	86	0.986763	18.7251	213.99	K	GKSLDGKAIKVEQATKPSFESGRRGPPPPPR	AIK(0.013)VEQATK(0.987)PSFESGR
P38159	63	1	171.187	207.4	K	SRGFAFVTFESPADAKDAARDMNGKSLDGKA	GFAFVTFESPADAK(1)DAAR
P38405	280	1	67.2136	67.214	K	NNRWLRTISIILFLNKQDMLAEKVLAGKSKI	TISIILFLNK(1)QDMLAEK(1)
P38432	496	1	178.386	224.55	K	LLELTSSYSPDVSDYKEGRILSHNPETQQVD	LLELTSSYSPDVSDYK(1)EGR
P38646	173	0.979048	16.6959	97.203	K	GKLYSPSQIGAFVLMKMKETAENYLGHTAKN	LYSPSQIGAFVLMK(0.979)MK(0.021)
P38919	152	1	81.0063	187.16	K	CHACIGGTNVGEDIRKLDYGQHVVAGTPGRV	K(1)LDYGQHVVAGTPGR
P39880	1266	0.999982	47.4654	136.27	K	LAPEEKEALKRAYQQKPYPSPKTIEDLATQL	AYQQK(1)PYPSPK
P41182	391	0.841868	7.61561	64.069	K	KKYKFIVLNSLNQNAKPEGPEQAELGRLSPR	FIVLNSLNQNAK(0.842)PEGPEQAELGR(0.146)LSPR(0.012)
P41227	179	0.999981	47.1035	94.384	K	LKEKGRHVVLGAIENKVESKGNSPPSSGEAC	HVVLGAIENK(1)VESK(1)GNSPPSSGEACR
P41227	183	0.999981	47.1035	94.384	K	GRHVVLGAIENKVESKGNSPPSSGEACREEK	HVVLGAIENK(1)VESK(1)GNSPPSSGEACR
P42684	630	0.99958	33.7656	125.41	K	QASSGSPALPRKQRDKSPSSLLEDAKETCFT	DK(1)SPSSLLEDAKETCFTR
P42695	1462	0.998053	27.0971	64.377	K	GRSQGNDILCLSLPDKPPPQPQQWNVRSPAR	SQGNDILCLSLPDK(0.998)PPPQPQQWNVR(0.002)
P43307	266	0.999985	48.3346	84.713	K	VDMSWIPQETLNQINKASPRRLPRKRAQKRS	VEMGTSSQNDVDMSWIPQETLNQINK(1)ASPR
P46013	697	0.873929	10.8101	84.641	K	QRSMNKRQRRPATPKKPVGEVHSQFSTGHAN	K(0.874)PVGEVHSQFSTGH(0.073)ANSPCTIIIGK(0.054)
P46013	1337	0.995132	25.2069	103.88	K	LTENLTGSKRRPQTPKEEAQALEDLTGFKEL	R(0.003)PQTPK(0.995)EEAQALEDLTGFK(0.002)
P46060	413	1	51.2797	51.28	K	PQQRGQGEKSATPSRKILDPNTGEPAPVLSS	K(1)ILDPNTGEPAPVLSSPPPADVSTFLAFPSPEK(1)
P46100	2003	0.996381	24.3995	71.159	K	ATSSSNPSSPAPDWYKDFVTDADAEVLEHSG	ATSSSNPSSPAPDWYK(0.996)DFVTDADAEVLEHSGK(0.004)
P46100	2233	0.999996	54.1935	97.957	K	PNSEKKKKRDTPMLPKDTILAELLQIHKEHI	DTPMLPK(1)DTILAELLQIHK
P46100	1530	0.960625	13.8733	186.94	K	EKLREVIEIEDASPTKCPITTKLVLDEDEET	LREVIEIEDASPTK(0.961)CPITTK(0.039)
P46100	601	0.945381	13.4771	73.994	K	LYVKLTPVSLSNSPIKGADCQEVPQDKDGYK	LTPVSLSNSPIK(0.945)GADCQEVPQDK(0.042)DGYK(0.012)
P46821	1250	1	51.5681	72.158	K	TTLDIKDSISAVSSEKVSPSKSPSLSPSPPS	DSISAVSSEK(1)VSPSK(1)SPSLSPSPPSPLEK(1)
P46821	1255	1	96.4668	106.1	K	KDSISAVSSEKVSPSKSPSLSPSPPSPLEKT	VSPSK(1)SPSLSPSPPSPLEK(1)
P46821	1217	0.999996	54.366	67.496	K	ASASTISPPSSMEEDKFSRSALRDAYCSEVK	DYNASASTISPPSSMEEDK(1)FSR
P46821	1496	0.999991	53.2817	140.81	K	VEAMSSQPALALDERKLGDVSPTQIDVSQFG	K(1)LGDVSPTQIDVSQFGSFKEDTK
P46821	838	0.924957	11.5362	66.401	K	LEAERSLMSSPEDLTKDFEELKAEEVDVTKD	SLMSSPEDLTK(0.925)DFEELK(0.01)AEEVDVTK(0.065)
P46821	1198	0.996414	24.4461	57.477	K	LNGFSEGSKTDATDGKDYNASASTISPPSSM	TDATDGK(0.996)DYNASASTISPPSSMEEDK(0.004)FSR
P46821	1874	0.971025	15.6521	73.603	K	DSGGKTPGDFSYAYQKPEETTRSPDEEDYDY	TPGDFSYAYQK(0.971)PEETTR(0.026)SPDEEDYDYESYEK(0.003)
P46821	2071	0.794672	5.87739	236.18	K	TYSYETSDLCYTAEKKSPSEARQDVDLCLVS	TPQASTYSYETSDLCYTAEK(0.205)K(0.795)SPSEAR
P46821	1777	1	104.703	191.4	K	YASLTSEKVQSLEGEKLSPKSDISPLTPRES	VQSLEGEK(1)LSPK(1)SDISPLTPR
P46821	1781	1	120	191.4	K	TSEKVQSLEGEKLSPKSDISPLTPRESSPLY	VQSLEGEK(1)LSPK(1)SDISPLTPR
P47736	483	1	96.6669	173.59	K	PDLAKAAGISLIVPGKSPTRKKSGPFGSRRS	AAGISLIVPGK(1)SPTR
P48651	414	1	89.7775	119.25	K	LYGMIWYAEHYGHREKTYSECEDGTYSPEIS	EK(1)TYSECEDGTYSPEISWHHR
P48681	911	0.997724	26.4219	113.65	K	GAWNLENLRSPEEVDKESQRNLEEEENLGKG	SLGAWNLENLR(0.002)SPEEVDK(0.998)ESQR
P49006	106	1	100.333	139.98	K	KFSFKKPFKLSGLSFKRNRKEGGGDSSASSP	LSGLSFK(1)R
P49023	329	0.99979	36.7695	90.78	K	AQGKTGSSSPPGGPPKPGSQLDSMLGSLQSD	TGSSSPPGGPPK(1)PGSQLDSMLGSLQSDLNK
P49327	2206	1	73.1408	86.08	K	SSKADEASELACPTPKEDGLAQQQTQLNLRS	ADEASELACPTPK(1)EDGLAQQQTQLNLR
P49454	3029	0.991594	20.7172	87.793	K	RLAAQKLALSPLSLGKENLAESSKPTAGGSR	LALSPLSLGK(0.992)ENLAESSK(0.008)PTAGGSR
P49585	341	1	112.985	147.75	K	RERSPSPSFRWPFSGKTSPPCSPANLSRHKA	WPFSGK(1)TSPPCSPANLSR
P49711	690	0.999692	35.1099	42.709	K	DQNTGAIENIIVEVKKEPDAEPAEGEEEEAQ	K(1)EPDAEPAEGEEEEAQPAATDAPNGDLTPEMILSMMDR
P49756	697	1	98.7717	110.32	K	NSVKRKKLPVDSVFNKFEDEDSDDVPRKRKL	LPVDSVFNK(1)FEDEDSDDVPR
P49760	141	0.99996	44.0867	124.2	K	RTFSRSSSQHSSRRAKSVEDDAEGHLIYHVG	AK(1)SVEDDAEGHLIYHVGDWLQER
P49790	613	0.984954	18.1599	92.943	K	RPAEILKEGSVLDILKSPGFASPKIDSVAAQ	EGSVLDILK(0.985)SPGFASPK(0.015)
P49790	228	0.987764	19.0703	206.64	K	ERSHSLSQHTATSSKKPAFNLSAFGTLSPSL	K(0.988)PAFNLSAFGTLSPSLGNSSILK(0.012)
P49790	384	0.999985	48.1505	115.29	K	TPKPVSIATNRSVYFKPSLTPSGEFRKTNQR	SVYFK(1)PSLTPSGEFRK
P49792	1415	0.999018	30.0767	94.717	K	SPENVQDRFALVTPKKEGHWDCSICLVRNEP	K(0.999)EGH(0.001)WDCSICLVR
P49916	232	0.813945	6.40952	102.97	K	FVTSTNPRKFSGFSAKPNNSGEAPSSPTPKR	FSGFSAK(0.814)PNNSGEAPSSPTPK(0.186)
P49916	213	1	161.729	190.37	K	VQAKLTTTGQVTSPVKGASFVTSTNPRKFSG	LTTTGQVTSPVK(1)GASFVTSTNPR
P50552	321	1	86.5664	87.958	K	VRRPWEKNSTTLPRMKSSSSVTTSETQPCTP	MK(1)SSSSVTTSETQPCTPSSSDYSDLQR
P50851	977	0.998587	28.565	119.97	K	RRDINVSVGSQQPDTKDSPVCPHFTTNGNEN	DINVSVGSQQPDTK(0.999)DSPVCPH(0.001)FTTNGNENSSIEK
P50851	1732	0.961595	13.986	61.214	K	VQFRSFDRSVIVAAKKSAVSPSTFNTSIPTN	K(0.962)SAVSPSTFNTSIPTNAVSVVSSVDSAQASDMGGESPGSR(0.038)
P50851	1259	1	114.301	130.66	K	LDVSNVATDTERLELKASPNVEAPQPHRHVL	LELK(1)ASPNVEAPQPHR
P51114	470	0.997575	28.5276	47.373	K	RGGPRGGKSSISSVLKDPDSNPYSLLDNTES	SSISSVLK(0.998)DPDSNPYSLLDNTESDQTADTDASESH(0.001)H(0.001)STNR
P51397	42	0.98808	19.1875	124.31	K	VQKHPHTGDTKEEKDKDDQEWESPSPPKPTV	DK(0.988)DDQEWESPSPPK(0.012)PTVFISGVIAR
P51397	54	0.995413	23.7091	154.95	K	EKDKDDQEWESPSPPKPTVFISGVIARGDKD	DK(0.004)DDQEWESPSPPK(0.995)PTVFISGVIAR
P51531	333	0.999761	36.2213	91.091	K	VLQLQQKQSRISPIQKPQGLDPVEILQEREY	QSRISPIQK(1)PQGLDPVEILQER
P51532	1450	0.999947	43.5347	226.67	K	DESKKQKKRGRPPAEKLSPNPPNLTKKMKKI	GRPPAEK(1)LSPNPPNLTK
P51610	665	0.991894	20.8767	108.23	K	VTTVVGGVTKTITLVKSPISVPGGSALISNL	TITLVK(0.992)SPISVPGGSALISNLGK(0.008)
P51812	224	1	140.083	190.55	K	LTDFGLSKEAIDHEKKAYSFCGTVEYMAPEV	K(1)AYSFCGTVEYMAPEVVNR
P51812	367	1	97.3859	142.4	K	EDTFYFDPEFTAKTPKDSPGIPPSANAHQLF	TPK(1)DSPGIPPSANAHQLFR
P52594	175	0.998292	27.4984	87.363	K	LKSLLGDSAPTLHLNKGTPSQSPVVGRSQGQ	SLLGDSAPTLH(0.04)LNK(0.998)GTPSQSPVVGR(0.962)
P52701	13	0.869419	8.2335	106.79	K	___MSRQSTLYSFFPKSPALSDANKASARAS	QSTLYSFFPK(0.869)SPALSDANK(0.131)
P52732	246	0.848797	7.54138	50.851	K	YSSRSHSVFSVTIHMKETTIDGEELVKIGKL	SH(0.987)SVFSVTIH(0.916)MK(0.849)ETTIDGEELVK(0.218)IGK(0.031)
P52799	258	0.957399	14.7858	122.44	K	ITLVVLLLKYRRRHRKHSPQHTTTLSLSTLA	K(0.957)HSPQH(0.011)TTTLSLSTLATPK(0.032)
P52948	551	1	79.635	155.86	K	TNPAAQKALTTPTHYKLTPRPATRVRPKALQ	ALTTPTHYK(1)LTPR
P52948	838	0.996157	24.1368	139	K	LDGVWPTDKTSRCLIKSPDRLADINYEGRLE	CLIK(0.996)SPDR(0.004)LADINYEGR
P52948	925	1	69.5472	94.349	K	PPASQTTPLQMALNGKPAPPPQSQSPEVEQL	TAPLPPASQTTPLQMALNGK(1)PAPPPQSQSPEVEQLGR
P53350	208	0.830553	6.90334	149.19	K	GDFGLATKVEYDGERKKTLCGTPNYIAPEVL	K(0.831)K(0.169)TLCGTPNYIAPEVLSK
P53396	471	1	89.5722	153.05	K	FSESRADEVAPAKKAKPAMPQDSVPSPRSLQ	AK(1)PAMPQDSVPSPR
P54132	138	0.996655	24.7414	68.444	K	QNTPTVKKSRDTALKKLEFSSSPDSLSTIND	K(0.997)LEFSSSPDSLSTINDWDDMDDFDTSETSK(0.003)
P54259	658	1	123.952	195.1	K	APSPGAYKTATPPGYKPGSPPSFRTGTPPGY	TATPPGYK(1)PGSPPSFR
P54687	360	1	58.4895	58.49	K	YKGETIHIPTMENGPKLASRILSKLTDIQYG	GETIH(1)IPTMENGPK(1)LASR(1)ILSK(1)
P55011	252	0.994495	22.581	85.191	K	KLLRPSLAELHDELEKEPFEDGFANGEESTP	LLRPSLAELHDELEK(0.994)EPFEDGFANGEESTPTR(0.005)
P55199	291	0.941377	12.0569	76.533	K	YSEGDQQLLKRVLVRKLCQPQSTGSLLGDPA	K(0.941)LCQPQSTGSLLGDPAASSPPGER(0.059)
P55201	136	0.853763	7.6628	70.291	K	EDEEAPEEAPENGSNKENTETPAATPKSGKH	ISIFDNLDVVSEDEEAPEEAPENGSNK(0.854)ENTETPAATPK(0.146)
P55265	613	0.925142	10.9202	81.151	K	ESQTPTPSATSFFSGKSPVTTLLECMHKLGN	TAESQTPTPSATSFFSGK(0.925)SPVTTLLECMHK(0.075)
P55327	175	0.999829	40.4046	110.64	K	VITKKLEDVKNSPTFKSFEEKVENLKSKVGG	NSPTFK(1)SFEEKVENLK
P55809	173	0.779801	5.49168	50.2	K	PTGYGTLVQEGGSPIKYNKDGSVAIASKPRE	AGGAGVPAFYTPTGYGTLVQEGGSPIK(0.78)YNK(0.22)
P56182	68	1	77.7105	83.064	K	LKVWKGLFYCMWMQDKPLLQEELGRTISQLV	GLFYCMWMQDK(1)PLLQEELGR
P56192	827	0.999644	36.1294	93.546	K	SLRQRFGGGQAKTSPKPAVVETVTTAKPQQI	TSPK(1)PAVVETVTTAKPQQIQALMDEVTK
P56524	649	1	125.551	139.78	K	PASATFPVSVQEPPTKPRFTTGLVYDTLMLK	AQSSPASATFPVSVQEPPTK(1)PR
P56589	197	0.999996	53.6533	73.057	K	VIKQAVQKVLGSVSLKHSLSLLDLEQKLKEI	VLGSVSLK(1)H(1)SLSLLDLEQK(0.159)LK(0.841)
P57678	619	0.939746	11.9307	73.688	K	VSCLKETVWMKFSTPKEEKQFLELLNCLMSP	FSTPK(0.94)EEK(0.06)QFLELLNCLMSPVK
P57740	85	1	166.484	221.59	K	LLRQPDISCILGTGGKSPRLTQSSGFFGNLS	QPDISCILGTGGK(1)SPR
P60174	19	0.999986	48.5809	231.58	K	SRKFFVGGNWKMNGRKQSLGELIGTLNAAKV	K(1)QSLGELIGTLNAAK
P61106	193	0.999995	53.2779	93.073	K	DGSLDLNAAESGVQHKPSAPQGGRLTSEPQP	IYQNIQDGSLDLNAAESGVQHK(1)PSAPQGGR
P61106	171	0.99105	22.9172	52.777	K	KTGENVEDAFLEAAKKIYQNIQDGSLDLNAA	K(0.991)IYQNIQDGSLDLNAAESGVQH(0.005)K(0.004)PSAPQGGR
P61978	219	1	184.839	294.52	K	ECIKIILDLISESPIKGRAQPYDPNFYDETY	IILDLISESPIK(1)GR
P61978	103	0.962403	14.082	91.336	K	LSISADIETIGEILKKIIPTLEEGLQLPSPT	K(0.962)IIPTLEEGLQLPSPTATSQLPLESDAVECLNYQHYK(0.038)
P62258	215	1	74.8797	118.76	K	DDAIAELDTLSEESYKDSTLIMQLLRDNLTL	AAFDDAIAELDTLSEESYK(1)DSTLIMQLLR
P62899	101	1	64.0127	124.66	K	VRLSRKRNEDEDSPNKLYTLVTYVPVTTFKN	NEDEDSPNK(1)LYTLVTYVPVTTFK
P63104	212	0.999998	56.8944	76.838	K	DEAIAELDTLSEESYKDSTLIMQLLRDNLTL	TAFDEAIAELDTLSEESYK(1)DSTLIMQLLR
P67870	208	0.97118	15.277	111.25	K	HPMAYQLQLQAASNFKSPVKTIR________	IHPMAYQLQLQAASNFK(0.971)SPVK(0.029)
P68104	5	0.880121	6.59907	58.123	K	___________MGKEKTHINIVVIGHVDSGK	MGK(0.481)EK(0.88)TH(0.627)INIVVIGHVDSGK(0.012)
P78347	827	0.999991	50.3843	64.096	K	ETAIKESTSSKSPPRKINSSPNVNTTASGVE	K(1)INSSPNVNTTASGVEDLNIIQVTIPDDDNER
P78527	4023	0.999985	48.2551	101.56	K	EPSFDWKNFEQKMLKKGGSWIQEINVAEKNW	K(1)GGSWIQEINVAEK
P78559	1206	0.884425	8.84584	69.674	K	PEDTQSLSLSEESPSKETSLDVSSKQLSPES	DRWPEVSPEDTQSLSLSEESPSK(0.884)ETSLDVSSK(0.115)
P83916	137	0.987098	18.8371	97.452	K	IIGATDSSGELMFLMKWKDSDEADLVLAKEA	IIGATDSSGELMFLMK(0.987)WK(0.013)
P85037	301	0.999994	52.388	74.284	K	AASEQQADTSGGDSPKDESKPPFSYAQLIVQ	AASEQQADTSGGDSPK(1)DESK(1)PPFSYAQLIVQAISSAQDR
P85037	305	0.999994	52.388	74.284	K	QQADTSGGDSPKDESKPPFSYAQLIVQAISS	AASEQQADTSGGDSPK(1)DESK(1)PPFSYAQLIVQAISSAQDR
P86397	151	1	67.6487	116.25	K	FIAIIAVSCSVIESKKTVMEGWVKVMVPEAS	K(1)TVMEGWVK
P98082	670	0.998972	29.8769	116.09	K	FKDFQLRQPPAVPARKGEQTSSGTLSAFASY	K(0.999)GEQTSSGTLSAFASYFNSK(0.001)
Q00536	143	1	131.381	157.5	K	EGYLEKLTLNSPIFDKPLSRRLRRVSLSEIG	LTLNSPIFDK(1)PLSR
Q00839	270	0.980607	17.9234	65.587	K	RGYFEYIEENKYSRAKSPQPPVEEEDEHFDD	AK(0.981)SPQPPVEEEDEH(0.016)FDDTVVCLDTYNCDLHFK(0.004)
Q01082	2344	1	66.8761	124.25	K	LPTSVVTITSESSPGKREKDKEKDKEKRFSL	AQTLPTSVVTITSESSPGK(1)R
Q01082	2123	0.999982	47.3585	68.934	K	KVSEEAESQQQWDTSKGEQVSQNGLPAEQGS	VSEEAESQQQWDTSK(1)GEQVSQNGLPAEQGSPR
Q01518	304	0.987615	19.0013	155.26	K	QSGPVRSGPKPFSAPKPQTSPSPKRATKKEP	PFSAPK(0.988)PQTSPSPK(0.996)R(0.016)
Q01664	126	0.999997	55.9891	143.55	K	TQLKRFIQELSGSSPKRRRAEDKDEGIGSPD	FIQELSGSSPK(1)R
Q01850	148	0.937943	12.0582	88.565	K	VEELKSSGQGRRSPGKCDQEKPAPSFACLKE	SPGK(0.938)CDQEK(0.058)PAPSFACLK(0.004)
Q02078	254	0.999995	52.9963	72.676	K	IGATGANSLGKVMPTKSPPPPGGGNLGMNSR	VMPTK(1)SPPPPGGGNLGMNSR
Q02241	899	1	87.4257	130.47	K	RGGGQSVQFTDIETLKQESPNGSRKRRSSTV	GGGQSVQFTDIETLK(1)QESPNGSR
Q02241	16	0.960645	13.8756	147.1	K	MKSARAKTPRKPTVKKGSQTNLKDPVGVYCR	K(0.961)GSQTNLK(0.039)DPVGVYCR
Q02447	551	0.999999	63.2542	86.793	K	LHPGENADSPADIRIKEEEPDPEEWQLSGDS	IK(1)EEEPDPEEWQLSGDSTLNTNDLTHLR
Q02543	56	0.952165	12.9897	128.95	K	KSRFWYFVSQLKKMKKSSGEIVYCGQVFEKS	K(0.952)SSGEIVYCGQVFEK(0.048)SPLR
Q02543	70	1	174.273	251.87	K	KKSSGEIVYCGQVFEKSPLRVKNFGIWLRYD	SSGEIVYCGQVFEK(1)SPLR
Q02750	168	1	82.483	82.483	K	QVLKKAGRIPEQILGKVSIAVIKGLTYLREK	IPEQILGK(1)VSIAVIK(1)
Q02790	108	0.8901	9.18302	67.478	K	AIATMKVGEVCHITCKPEYAYGSAGSPPKIP	VGEVCH(0.002)ITCK(0.89)PEYAYGSAGSPPK(0.107)
Q02880	1574	1	104.397	133.31	K	NPGRKTSKTTSKKPKKTSFDQDSDVDIFPSD	K(1)TSFDQDSDVDIFPSDFPTEPPSLPR
Q02880	1463	0.987094	18.8358	171.13	K	FSFPSYSQKSEDDSAKFDSNEEDSASVFSPS	SEDDSAK(0.987)FDSNEEDSASVFSPSFGLK(0.013)
Q02880	1398	0.999995	55.9841	90.211	K	DDDDDDNNDLEELKVKASPITNDGEDEFVPS	VK(1)ASPITNDGEDEFVPSDGLDKDEYTFSPGK
Q02952	376	0.844145	8.25767	44.099	K	PAESAHEPRLSAEYEKVELPSEEQVSGSQGP	LSAEYEK(0.844)VELPSEEQVSGSQGPSEEK(0.126)PAPLATEVFDEK(0.03)
Q03112	65	1	91.3014	92.428	K	ATSSEAFTPKEGSPYKAPIYIPDDIPIPAEF	EGSPYK(1)APIYIPDDIPIPAEFELR
Q03135	5	0.999999	60.1195	119.69	K	___________MSGGKYVDSEGHLYTVPIRE	SGGK(1)YVDSEGHLYTVPIR
Q03188	297	0.960472	13.8562	120.13	K	HAATAPPHSCPPDDTKLIEDEFIIDESDQSF	HAATAPPH(0.04)SCPPDDTK(0.96)LIEDEFIIDESDQSFASR
Q04323	208	0.998264	28.0041	93.175	K	EPGPVPSSPSQEPPTKREYDQCRIQVRLPDG	K(0.002)YGGSVGSQPPPVAPEPGPVPSSPSQEPPTK(0.998)R
Q04637	1234	0.984814	20.6821	128.66	K	DAVKREAALPPVSPLKAALSEEELEKKSKAI	EAALPPVSPLK(0.985)AALSEEELEK(0.008)K(0.007)
Q05209	564	0.850327	8.91483	96.842	K	DLSEGNSSDINYQTRKTVSLTPSPTTQVETP	K(0.85)TVSLTPSPTTQVETPDLVDH(0.041)DNTSPLFR(0.109)
Q05655	649	0.9921	22.1972	88.708	K	DQEFLNEKARLSYSDKNLIDSMDQSAFAGFS	AR(0.006)LSYSDK(0.992)NLIDSMDQSAFAGFSFVNPK(0.002)
Q07020	132	1	69.011	92.664	K	GGKILTFDQLALDSPKGCGTVLLSGPRKGRE	ILTFDQLALDSPK(1)GCGTVLLSGPR
Q07157	348	0.998854	30.2903	93.812	K	PSNGSLRSRDEERISKPGAVSTPVKHADDHT	ISK(0.999)PGAVSTPVK(0.001)HADDHTPK
Q07157	1370	0.934718	12.6575	58.382	K	YRKQLSYFDRRSFENKPPAHIAASHLSEPAK	SFENK(0.935)PPAH(0.051)IAASH(0.007)LSEPAK(0.006)PAH(0.001)SQNQSNFSSYSSK
Q08AD1	486	0.818286	6.53618	58.08	K	NNSHVSKHIRKNLSFKPINGEEEAESIEEEL	NLSFK(0.818)PINGEEEAESIEEELNIDSHSDLK(0.182)
Q09666	4985	0.789324	5.73639	157.78	K	VKIPKFKKPKFGFGAKSPKADIKSPSLDVTV	FGFGAK(0.789)SPK(0.211)
Q09666	4515	0.779618	5.64775	91.166	K	GKLKGPKFKMPDVHFKSPQISMSDIDLNLKG	MPDVH(0.212)FK(0.78)SPQISMSDIDLNLK(0.004)GPK(0.004)
Q09666	5847	0.994788	23.8711	173.77	K	SKGHYEVTGSDDETGKLQGSGVSLASKKSRL	SK(0.001)GHYEVTGSDDETGK(0.995)LQGSGVSLASK(0.004)
Q09666	2396	0.922181	10.7377	126.56	K	FKAPKISMPDLDLHLKSPKAKGEVDVDVPKL	ISMPDLDLHLK(0.922)SPK(0.078)
Q09666	489	0.965564	16.5957	146.69	K	IATGGLEGKMKGTKVKTPEMIIQKPKISMQD	VK(0.966)TPEMIIQK(0.021)PK(0.013)
Q12774	1174	0.99997	45.2481	104.59	K	VRNSTVLLSMTHEDQKLQEVKFELIVSEASY	NSTVLLSMTH(1)EDQK(1)LQEVK
Q12789	1636	1	99.6941	180.56	K	DLDEGVGGKRRSMEVKPAQASHTNYLLMRGY	SMEVK(1)PAQASHTNYLLMR
Q12830	1669	0.943014	12.1875	56.476	K	VNQVEDMEIETSEVKKVTSSPITSEEESNLS	K(0.943)VTSSPITSEEESNLSNDFIDENGLPINK(0.057)
Q12837	9	0.936198	15.1019	47.808	K	_______MMMMSLNSKQAFSMPHGGSLHVEP	MMMMSLNSK(0.936)QAFSMPH(0.037)GGSLH(0.002)VEPK(0.025)
Q12872	912	0.99901	30.0406	145.7	K	SRGSSQERSRGVSQEKEAQISSAIVSSVQSK	GVSQEK(0.999)EAQISSAIVSSVQSK(0.001)
Q12872	278	0.998895	32.2239	67.388	K	GRYTVLAENKSDEKKKSGVSSDNEDDDDEED	K(0.999)SGVSSDNEDDDDEEDGNYLH(0.001)PSLFASK(0.001)
Q12888	293	0.866195	8.11143	114.88	K	QLSAQELMESGLQIQKSPEPEVLSTQEDLFD	EQLSAQELMESGLQIQK(0.866)SPEPEVLSTQEDLFDQSNK(0.134)
Q12888	1434	1	65.1184	109.05	K	PLGIEDISPNLSPDDKSFSRVVPRVPDSTRR	ETAVPGPLGIEDISPNLSPDDK(1)SFSR
Q12888	1074	0.761375	7.53061	125.15	K	RGNLLHFPSSQGEEEKEKLEGDHTIRQSQQP	GNLLH(0.134)FPSSQGEEEK(0.761)EK(0.103)LEGDHTIR(0.001)
Q12888	1205	0.999942	42.9081	98.258	K	GKQDATVQTERGSGEKPVSAPGDDTESLHSQ	GSGEK(1)PVSAPGDDTESLH(1)SQGEEEFDMPQPPHGHVLHR
Q12888	1685	0.78631	5.65874	75.957	K	LITSEEERSPAKRGRKSATVKPGAVGAGEFV	K(0.786)SATVK(0.214)PGAVGAGEFVSPCESGDNTGEPSALEEQR
Q12888	1009	1	65.8607	85.184	K	PETEASEESLQFNLEKPATGERKNGSTAVAE	LVSPETEASEESLQFNLEK(1)PATGER
Q12888	990	0.987489	18.9724	106.72	K	SGAAPDVDDKLCLRMKLVSPETEASEESLQF	MK(0.987)LVSPETEASEESLQFNLEK(0.013)PATGER
Q12888	1091	0.993511	22.0946	165.78	K	KLEGDHTIRQSQQPMKPISPVKDPVSPASQK	QSQQPMK(0.994)PISPVK(0.006)DPVSPASQK
Q12888	1097	0.986454	18.8539	185.96	K	TIRQSQQPMKPISPVKDPVSPASQKMVIQGP	QSQQPMK(0.001)PISPVK(0.986)DPVSPASQK(0.013)
Q12888	780	0.999976	46.1227	52.069	K	SPRVDVSCEPLEGVEKCSDSQSWEDIAPEIE	VDVSCEPLEGVEK(1)CSDSQSWEDIAPEIEPCAENR
Q12906	489	0.998797	29.1935	53.687	K	RDSSKGEDSAEETEAKPAVVAPAPVVEAVST	GEDSAEETEAK(0.999)PAVVAPAPVVEAVSTPSAAFPSDATAEQGPILTK(0.001)
Q12923	2191	1	91.3133	91.313	K	DELAVLPVVKVLPSGKYTGANLKSVIRVLRG	VLPSGK(1)YTGANLK(1)SVIR(1)
Q12923	2198	1	91.3133	91.313	K	VVKVLPSGKYTGANLKSVIRVLRGLLDQGIP	VLPSGK(1)YTGANLK(1)SVIR(1)
Q12996	697	1	90.8842	179.55	K	KAVKRPNEDSDEDEEKGAVVPPVHDIYRARQ	RPNEDSDEDEEK(1)GAVVPPVHDIYR
Q13029	1257	0.793199	5.83831	98.657	K	VEHMQSLPEDPLETSKEEEELNDSSEELYTT	AHVEHMQSLPEDPLETSK(0.793)EEEELNDSSEELYTTIK(0.207)
Q13085	1279	0.861061	7.92417	63.77	K	PTFPEAGHTSLYDEDKVPRDEPIHILNVAIK	IFDEVMGCFSDSPPQSPTFPEAGH(0.139)TSLYDEDK(0.861)VPR
Q13112	457	0.91355	10.6438	60.343	K	APTVIRDPPSITPAVKSPLPGPSEEKTLQPS	QAPAPTVIR(0.008)DPPSITPAVK(0.914)SPLPGPSEEK(0.079)
Q13144	551	1	73.864	90.017	K	EEPDSRGGSPQMDDIKVFQNEVLGTLQRGKE	GGSPQMDDIK(1)VFQNEVLGTLQR
Q13177	147	0.83392	7.00806	136.43	K	SNTVKQKYLSFTPPEKDGFPSGTPALNAKGT	YLSFTPPEK(0.834)DGFPSGTPALNAK(0.166)
Q13309	43	0.999805	37.2126	118.93	K	KTSELLSGMGVSALEKEEPDSENIPQELLSN	TSELLSGMGVSALEK(1)EEPDSENIPQELLSNLGHPESPPR
Q13330	582	1	101.059	134.06	K	KVAPVINNGSPTILGKRSYEQHNGVDGNMKK	VAPVINNGSPTILGK(1)R
Q13416	229	0.796341	5.92196	137.46	K	QNRVVSAPVGKETPSKRMKRDKTSDLVEEYF	VVSAPVGK(0.204)ETPSK(0.796)R
Q13428	308	0.991889	21.1472	103.41	K	ASEKILQVRAASAPAKGTPGKGATPAPPGKA	AASAPAK(0.992)GTPGK(0.008)GATPAPPGK
Q13428	507	0.992926	21.4725	107.09	K	MNAAQVKPLGKSPQVKPASTMGMGPLGKGAG	SPQVK(0.993)PASTMGMGPLGK(0.007)
Q13428	155	1	96.3587	246.51	K	PHPATGKTVANLLSGKSPRKSAEPSANTTLV	TVANLLSGK(1)SPR
Q13435	770	0.947352	12.5516	163.62	K	PAGMETPELIELRKKKIEEAMDGSETPQLFT	K(0.947)IEEAMDGSETPQLFTVLPEK(0.053)R
Q13501	295	1	77.8215	85.881	K	EKSSSQPSSCCSDPSKPGGNVEGATQSLAEQ	SSSQPSSCCSDPSK(1)PGGNVEGATQSLAEQMR
Q13535	829	1	73.9837	73.984	K	EDPDKDVRVAFSGNIKHILESLDSEDGFIKE	VAFSGNIK(1)H(1)ILESLDSEDGFIK(1)
Q13541	69	0.999989	51.6092	129.34	K	YDRKFLMECRNSPVTKTPPRDLPTIPGVTSP	NSPVTK(1)TPPR(1)DLPTIPGVTSPSSDEPPMEASQSHLR
Q13547	403	0.999982	47.7896	102.94	K	AIPEESGDEDEDDPDKRISICSSDKRIACEE	MLPHAPGVQMQAIPEDAIPEESGDEDEDDPDK(1)R
Q13615	730	0.965614	17.2173	79.408	K	QEGKEDPLLEKESRRKTPEASAIGLHQDPEL	R(0.016)K(0.966)TPEASAIGLH(0.018)QDPELGDAALR
Q13621	956	1	83.8829	83.883	K	LRIYVGGKINRIEEEKIVMASLLSKFRIKFA	IEEEK(1)IVMASLLSK(1)
Q13625	573	0.989215	20.4743	43.818	K	SIPSVGQDQTLSPGSKQESPPAAAVRPFTPQ	VLLSPSIPSVGQDQTLSPGSK(0.989)QESPPAAAVR(0.002)PFTPQPSK(0.009)
Q13813	969	0.973248	15.6086	96.341	K	QSCRQQVAPTDDETGKELVLALYDYQEKSPR	QQVAPTDDETGK(0.973)ELVLALYDYQEK(0.027)SPR
Q13838	36	1	80.252	96.371	K	AAGGDGAEAPAKKDVKGSYVSIHSSGFRDFL	DVK(1)GSYVSIHSSGFR
Q14004	1154	0.979782	16.8539	62.696	K	GEKQTDPSTPQQESSKPLGGIQPSSQTIQPK	QTDPSTPQQESSK(0.98)PLGGIQPSSQTIQPK(0.02)
Q14155	256	0.990975	20.6491	171.26	K	VKASEKPVSPKSGTLKSPPKGFDTTAINKSY	SGTLK(0.991)SPPK(0.009)GFDTTAINK
Q14157	420	1	144.897	217.19	K	DLKNPSDSAVHSPFTKRQAFTPSSTMMEVFL	NPSDSAVHSPFTK(1)R
Q14590	373	0.781345	5.31065	50.869	K	QSSHLYAHLPIHTGEKPYRCDSCGKGFSRST	PYTCHECGKSFNQSSH(0.002)LYAH(0.006)LPIH(0.273)TGEK(0.781)PYR(0.938)
Q14596	940	0.999985	48.103	50.426	K	FEMGFCDRQLNLRLLKKHNYNILQVVTELLQ	LLK(1)K(1)H(1)NYNILQVVTELLQLNNNDWYSQR
Q14596	941	0.999985	48.103	50.426	K	EMGFCDRQLNLRLLKKHNYNILQVVTELLQL	LLK(1)K(1)H(1)NYNILQVVTELLQLNNNDWYSQR
Q14677	297	0.999222	31.4025	139.63	K	SKTIDLGAAAHYTGDKASPDQNASTHTPQSS	TIDLGAAAH(0.001)YTGDK(0.999)ASPDQNASTHTPQSSVK
Q14680	476	0.984319	18.1478	107.65	K	PNRYTTPSKARNQCLKETPIKIPVNSTGTDK	NQCLK(0.984)ETPIK(0.015)IPVNSTGTDK(0.001)
Q14684	330	0.997477	25.9691	135.28	K	NTPHFNRKRLSKLIKKFQDLSEGSSISQLSF	K(0.997)FQDLSEGSSISQLSFAEDISADEDDQILSQGK(0.003)
Q14694	350	0.850529	8.84522	76.891	K	PVSQPKSWASLFHDSKPSSSSPVAYVETKYS	SWASLFH(0.032)DSK(0.851)PSSSSPVAYVETK(0.111)YSPPAISPLVSEK(0.006)
Q14694	363	0.996891	26.0078	93.956	K	DSKPSSSSPVAYVETKYSPPAISPLVSEKQV	SWASLFHDSKPSSSSPVAYVETK(0.997)YSPPAISPLVSEK(0.002)
Q14738	572	0.999945	42.6233	137.81	K	QMLKDIKKEKVLLRRKSELPQDVYTIKALEA	RK(1)SELPQDVYTIK
Q14739	116	0.999953	43.2797	136.02	K	SHQADIKEARREVEVKLTPLILKPFGNSISR	EVEVK(1)LTPLILKPFGNSISR
Q14814	250	1	84.5448	120.71	K	LPVANGNSLNKVIPAKSPPPPTHSTQLGAPS	VIPAK(1)SPPPPTHSTQLGAPSR
Q14839	1528	0.995613	23.5425	69.456	K	NGRWSMPELAEVEENKKMSQPGSPSPKTPTP	WSMPELAEVEENK(0.996)K(0.996)MSQPGSPSPK(0.008)
Q14839	1529	0.996241	24.2133	69.456	K	GRWSMPELAEVEENKKMSQPGSPSPKTPTPS	WSMPELAEVEENK(0.996)K(0.996)MSQPGSPSPK(0.008)
Q14978	695	1	90.2292	111.81	K	GSYRGGSISVQVNSIKFDSE___________	GGSISVQVNSIK(1)FDSE
Q14980	1223	1	122.6	133.92	K	EWKAQVARGRQEAERKNSLISSLEEEVSILN	K(1)NSLISSLEEEVSILNR
Q14980	1766	1	76.6927	107.69	K	VPGEPASPISQRLPPKVESLESLYFTPIPAR	LPPK(1)VESLESLYFTPIPAR
Q14C86	781	1	66.3599	76.678	K	SVVSGISATSEDIPNKIEDLRSECSSDFGGK	EVSSR(1)PSTPGLSVVSGISATSEDIPNK(1)IEDLR
Q15003	41	0.996728	24.8374	108.69	K	ASSPSERVFPMPLPRKAPLNIPGTPVLEDFP	K(0.997)APLNIPGTPVLEDFPQNDDEK(0.003)ER
Q15003	424	1	77.1615	93.776	K	LGDGDIRTMCPLLSMKPGEYSYFSPRTMSMW	TMCPLLSMK(1)PGEYSYFSPR
Q15019	225	0.999343	31.8245	184.22	K	IYHLPDAESDEDEDFKEQTRLLKASIPFSVV	IYH(0.001)LPDAESDEDEDFK(0.999)EQTR
Q15047	1069	1	76.5635	148.85	K	VTESSRNYGYNPSPVKPEGLRRPPSKTSMHQ	NYGYNPSPVK(1)PEGLR
Q15057	515	0.950341	13.8963	102.47	K	EAYIRAKYVERKFVDKYSISLSPPEQQKKFV	FVDK(0.95)YSISLSPPEQQK(0.011)K(0.039)
Q15154	996	0.999016	32.8115	102.79	K	QENLRWVSELSYVEEKEQWQEQINQLKKQLD	WVSELSYVEEK(0.999)EQWQEQINQLK(0.001)K
Q15185	107	1	89.5704	118.51	K	ERAKLNWLSVDFNNWKDWEDDSDEDMSNFDR	LNWLSVDFNNWK(1)DWEDDSDEDMSNFDR
Q15276	23	1	68.9173	89.301	K	SQPDVSLQQRVAELEKINAEFLRAQQQLEQE	VAELEK(1)INAEFLR
Q15311	37	1	142.761	167.61	K	SGLTRTPSSEEISPTKFPGLYRTGEPSPPHD	TPSSEEISPTK(1)FPGLYR
Q15361	879	0.999841	38.0021	78.618	K	DIFYYEDDSEGEDIEKESEGQAPCMAHACNS	DIFYYEDDSEGEDIEK(1)ESEGQAPCMAHACNSSTLGGQGR
Q15366	185	1	112.228	129	K	LSQSPPKGVTIPYRPKPSSSPVIFAGGQDRY	PK(1)PSSSPVIFAGGQDR
Q15418	361	1	97.7746	155.2	K	DDTFYFDTEFTSRTPKDSPGIPPSAGAHQLF	TPK(1)DSPGIPPSAGAHQLFR
Q15545	190	0.999999	61.4385	78.451	K	EAVSTRWEIIAEDETKEAENQGLDISSPGMS	WEIIAEDETK(1)EAENQGLDISSPGMSGHR
Q15643	1887	0.999877	39.1674	133.48	K	SHPSIPPPKLSVHDMKPLDSPGRRKRDTNAP	LSVHDMK(1)PLDSPGR
Q15648	1020	0.998947	29.7895	99.943	K	SKDKPPKRKKADTEGKSPSHSSSNRPFTPPT	ADTEGK(0.999)SPSH(0.001)SSSNRPFTPPTSTGGSK
Q15648	1222	0.997483	25.9802	131.62	K	SPMKPVPGTPPSSKAKSPISSGSGGSHMSGT	AK(0.997)SPISSGSGGSHMSGTSSSSGMK(0.003)
Q15648	1188	0.995505	25.8154	163.91	K	KPQGKPSSLMNPSLSKPNISPSHSRPPGGSD	PSSLMNPSLSK(0.996)PNISPSH(0.003)SRPPGGSDK(0.001)
Q15691	151	0.999998	57.2057	149.99	K	AVAPSLVAPALNKPKKPLTSSSAAPQRPIST	K(1)PLTSSSAAPQRPISTQR
Q15697	271	1	94.5328	119.39	K	EPRLSRRQVSSPNAQKPFAHYQRHCRVEYIS	QVSSPNAQK(1)PFAHYQR
Q15942	279	1	80.4101	95.227	K	PKFSPVTPKFTPVASKFSPGAPGGSGSQPNQ	FTPVASK(1)FSPGAPGGSGSQPNQK(1)
Q16143	12	0.999567	33.7853	71.888	K	____MDVFMKGLSMAKEGVVAAAEKTKQGVT	DVFMKGLSMAK(1)EGVVAAAEK(1)
Q1ED39	118	0.978564	16.5951	103.75	K	VFGHLEFLSGEKKNKKSPLAMSHASGVKTSP	K(0.979)SPLAMSHASGVK(0.021)TSPDPR
Q1ED39	130	0.999971	45.3894	188.63	K	KNKKSPLAMSHASGVKTSPDPRQGEEETRVG	SPLAMSHASGVK(1)TSPDPR
Q1KMD3	227	0.881465	8.82797	83.633	K	RAYYEFREEAYHSRSKSPLPPEEEAKDEEED	SK(0.881)SPLPPEEEAK(0.115)DEEEDQTLVNLDTYTSDLHFQVSK(0.003)
Q1KMD3	237	0.971085	15.3406	87.203	K	YHSRSKSPLPPEEEAKDEEEDQTLVNLDTYT	SK(0.028)SPLPPEEEAK(0.971)DEEEDQTLVNLDTYTSDLHFQVSK(0.001)
Q27J81	380	0.977373	16.3572	53.231	K	DQSQRGSSPQNTTTPKPSVEGQQPAAAAACE	GSSPQNTTTPK(0.977)PSVEGQQPAAAAACEPVDHAQSESILK(0.023)
Q27J81	1132	0.998561	29.2068	71.445	K	SSNQPPAAGSSRQDAKDPTSLLGVLQAEADS	QDAK(0.999)DPTSLLGVLQAEADSTSEGLEDAVH(0.001)SR
Q2KHR3	1194	0.778258	8.30326	50.322	K	PGTQMVRTFCPPPLPKPSSTTPTPLVSETGG	TFCPPPLPK(0.778)PSSTTPTPLVSETGGNSPSDK(0.115)VDNELK(0.107)
Q2M3M2	3	1	66.6977	70.488	K	_____________MSKELAAMGPGASGDGVR	SK(1)ELAAMGPGASGDGVR
Q2NKX8	1038	0.999672	34.8364	93.505	K	ARRIVSDGEDEDDSFKDTSSINPFNTSLFQF	IVSDGEDEDDSFK(1)DTSSINPFNTSLFQFSSVK
Q3B726	326	0.951294	12.94	107.13	K	KKRKHSEEAEFTPPLKCSPKRKGKSNFL___	KHSEEAEFTPPLK(0.951)CSPK(0.048)
Q3KQU3	493	0.775149	5.37763	96.133	K	ASPCPSPGPGHTLPPKPPSPRGTTASPKGRV	PASPCPSPGPGH(0.225)TLPPK(0.775)PPSPR
Q3SY69	641	1	75.682	75.682	K	TALKFAELSVKAGFPKGVINIIPGSGGIAGQ	AGFPK(1)GVINIIPGSGGIAGQR(1)
Q4KMP7	134	0.997338	25.7364	119.6	K	GVETSRALAAGADSPKTEEARPSPAPGPGTP	ALAAGADSPK(0.997)TEEAR(0.003)PSPAPGPGTPTGTPTR
Q4LE39	667	0.995607	23.5529	167.95	K	DEKYSPKNCKLRRLSKPPFQTNPSPEMVSKL	RLSK(0.996)PPFQTNPSPEMVSK(0.004)
Q4LE39	777	0.999198	30.9736	216	K	ENKVHADLVISKPVSKSPERLRKDIEVLSED	VHADLVISK(0.001)PVSK(0.999)SPER
Q53EZ4	427	1	103.311	103.31	K	FQGETENREKVAASPKSPTAALNESLVECPK	VAASPK(1)SPTAALNESLVECPK(1)
Q5FWF5	7	0.971118	15.2665	94.262	K	_________MMSIQEKSKENSSKVTKKSDDK	MSIQEK(0.971)SK(0.029)
Q5JRA6	1723	0.999997	55.6614	74.206	K	DGPLPHPRWSAEASGKPSPSDPGSGTATMMN	WSAEASGK(1)PSPSDPGSGTATMMNSSSR
Q5JSZ5	910	0.880325	8.67053	51.025	K	TAFNISSWDKNGSPNKQPSSEPEWTPEPRSS	EGTAFNISSWDK(0.12)NGSPNK(0.88)QPSSEPEWTPEPR
Q5JSZ5	1697	0.999076	30.3392	128.74	K	SSATSSQRSSPYGTLKPEEMSGPGLAEPKAD	SSPYGTLK(0.999)PEEMSGPGLAEPK(0.001)
Q5JSZ5	1468	0.999991	50.2847	172.28	K	SPRYESQQNGTPLKVKRSPDEALPGGLSGCS	VK(1)RSPDEALPGGLSGCSSGSGHSPYALER
Q5JVS0	96	0.875421	9.86758	113.63	K	HRAGAGGRRESQKERKSLPAPVAQRPDSPGG	K(0.875)SLPAPVAQR(0.09)PDSPGGGLQAPGQK(0.034)
Q5QJE6	132	1	84.6398	98.887	K	SPVSSVRKKPKVTPTKESYTEEIVSEAESHV	VTPTK(1)ESYTEEIVSEAESHVSGISR
Q5SW79	843	0.998721	29.0626	57.39	K	ESSKSLVRQGSFTIEKPSPNIPIELIPHINK	QGSFTIEK(0.999)PSPNIPIELIPHINK(0.001)
Q5SY16	485	0.995268	23.2291	149.36	K	RLAAFADALEFADEEKESPVEFTGHKLIGVY	LAAFADALEFADEEK(0.995)ESPVEFTGHK(0.005)
Q5T1R4	1011	1	76.6009	80.002	K	SPNVSHSAHMTETRSKSFDYGSLSLTGPSAP	SK(1)SFDYGSLSLTGPSAPAPVAPPAR
Q5T5C0	757	0.924939	12.8602	132.62	K	KFSKMVANDIAKMSRKLSLPTDLKPDLDVKD	K(0.925)LSLPTDLK(0.027)PDLDVK(0.048)
Q5T5Y3	721	0.99997	45.1657	123.55	K	RADEDTEGRLYVSCSKSPNSHDSEPWTLLRQ	LYVSCSK(1)SPNSHDSEPWTLLR
Q5T6F0	35	0.999874	39.0928	78.752	K	SDAQGPQFGWDHSLHKRKRLPPVKRSLVYYL	APASPGAGSDAQGPQFGWDHSLHK(1)R
Q5T6F0	11	0.998943	29.758	64.27	K	_____MARKVVSRKRKAPASPGAGSDAQGPQ	K(0.999)APASPGAGSDAQGPQFGWDHSLHK(0.001)
Q5T6F2	252	0.999114	30.5202	87.208	K	QDLSNKSSYGLKGAWKNSVEEWTTEDWTEDL	GAWK(0.999)NSVEEWTTEDWTEDLSETK(0.001)
Q5T7B8	1122	0.999921	41.0349	104.3	K	SATRHLWLSSSPPDNKPGGDLPALSPSPIRQ	HLWLSSSPPDNK(1)PGGDLPALSPSPIR
Q5TCZ1	552	0.999993	51.5578	76.329	K	GPTGASESQDSPRKLKYEEPEYDIPAFGFDS	LK(1)YEEPEYDIPAFGFDSEPELSEEPVEDR
Q5TZ20	272	0.999996	54.2353	56.488	K	FMYLQPANRRSKNQGKFVSLFYTIVTPLLNP	NQGK(1)FVSLFYTIVTPLLNPIIYTLR
Q5VT06	943	0.953204	13.3325	101.61	K	PQSAISSFRVRSPGPKPEGLLAQLCKRQTDS	VR(0.003)SPGPK(0.953)PEGLLAQLCK(0.044)
Q5VT52	741	0.996415	24.4394	68.361	K	RDERSGTPTQDEMMDKPTSSSVDTMSLLSKI	SGTPTQDEMMDK(0.996)PTSSSVDTMSLLSK(0.004)
Q5VUA4	1854	0.994124	22.2834	156.16	K	NKLMTGSETPSKVVIKLSPQACSFTKAKLDS	VVIK(0.994)LSPQACSFTK(0.006)
Q5VWN6	1360	1	73.2937	73.294	K	VYPSVSEEPVENKERKGDNLQPVTLILSKEN	K(1)GDNLQPVTLILSK(1)
Q5VWN6	2007	0.994334	22.4423	167.55	K	NGDSQHSASSANVFPKESPTQISIGAFPSTK	NGDSQHSASSANVFPK(0.994)ESPTQISIGAFPSTK(0.006)
Q5VZ89	740	0.949101	12.706	119.68	K	LKLCFSRHPTGNSITKSPPLMAKRTKQEIKT	HPTGNSITK(0.949)SPPLMAK(0.051)
Q63ZY3	26	0.975869	19.0027	48.716	K	FPGTPGPASPPAFPAKDPDPPYSVETPYGYR	AQVLH(0.012)VPAPFPGTPGPASPPAFPAK(0.976)DPDPPYSVETPYGYR(0.012)
Q641Q2	810	0.98612	18.5153	76.588	K	PRTKTVLSLFDEEEDKMEDQNIIQAPQKEVG	TVLSLFDEEEDK(0.986)MEDQNIIQAPQK(0.014)
Q66GS9	491	0.91129	10.1169	72.801	K	SYSAREKSSIFRTPEKGDYNSEIHQITRERD	SSIFR(0.089)TPEK(0.911)GDYNSEIHQITR
Q66K14	396	0.999462	32.6892	102.84	K	KDRDFLVQRISDFLQKTPSKQPGSIGSRKAS	ISDFLQK(0.999)TPSK(0.001)QPGSIGSR
Q66K14	461	0.991431	20.6331	121.36	K	QEAPTASQGLLKLFQKNSPMEDLGAKGAKEK	LFQK(0.991)NSPMEDLGAK(0.009)
Q68CZ2	774	0.995422	23.3734	148.36	K	RQGSSAEQPLGGRLRKLSLGQYDNDAGGQLP	K(0.995)LSLGQYDNDAGGQLPFSK(0.005)
Q68DK7	204	0.997018	25.2425	116	K	AGTLAASEGRWKSMRKSPLGGGGGSGASSQA	K(0.997)SPLGGGGGSGASSQAACLK(0.003)
Q68EM7	578	0.998922	29.6658	42.55	K	GILEQGPSPGDGSPPKPKDPVSAAVPAPGRN	AESSSGGGTVPSSAGILEQGPSPGDGSPPK(0.999)PK(0.999)DPVSAAVPAPGR(0.002)
Q68EM7	580	0.998922	29.6658	74.498	K	LEQGPSPGDGSPPKPKDPVSAAVPAPGRNNS	AESSSGGGTVPSSAGILEQGPSPGDGSPPK(0.999)PK(0.999)DPVSAAVPAPGR(0.002)
Q69YH5	939	0.999999	61.3192	82.627	K	ICTFDSSGFESMSPIKETVSSRQKPQMAPPV	TICTFDSSGFESMSPIK(1)ETVSSR
Q6IE81	746	1	80.8887	92.264	K	NQTAVKVPTTPASPVKNWGGFRIPKKGERQQ	VPTTPASPVK(1)NWGGFR
Q6IQ55	482	0.999447	35.1329	62.707	K	LETCLEKMQKDTSAGKESILPALLHKPCVPA	DTSAGK(0.999)ESILPALLHKPCVPAVSR
Q6L8Q7	202	0.999944	42.495	79.426	K	FGDPASSLFRWYKEAKPGAAEPEVGVPSSLS	EAK(1)PGAAEPEVGVPSSLSPSSPSSSWTETDVEER
Q6NZI2	299	1	114.275	162.88	K	AERREKLKTSRDKLRKSFTPDHVVYARSKTA	K(1)SFTPDHVVYAR
Q6P0N0	1020	0.868996	8.21733	54.072	K	FQDSEDDDDILPNMDKNPTTPSSVIFPLVKT	ILLPSFQDSEDDDDILPNMDK(0.869)NPTTPSSVIFPLVK(0.131)
Q6P0Q8	72	0.935601	11.6221	138.19	K	KEQDVVTGVSPLLFRKLSNPDIFSSTGKVKL	K(0.936)LSNPDIFSSTGK(0.064)
Q6P996	18	1	82.8985	130.44	K	ASLEKIADPTLAEMGKNLKEAVKMLEDSQRR	IADPTLAEMGK(1)NLKEAVK
Q6PIJ6	698	0.940145	11.961	117.54	K	ADMKAARDIPEKKKNKDVYPSCSSTTASTVG	NK(0.94)DVYPSCSSTTASTVGNSSSH(0.06)NTASQSPDFVR
Q6PJT7	667	0.998089	27.1809	79.935	K	CPFTHVSRRIPVLSPKPAVAPPAPPSSSQLC	R(0.002)IPVLSPK(0.998)PAVAPPAPPSSSQLCR
Q6PL24	151	0.995848	23.7997	71.853	K	LSADLESADLLGDHRKVSPPLMAPPCIWTFA	K(0.996)VSPPLMAPPCIWTFAK(0.004)
Q6SPF0	435	0.970939	15.2429	55.919	K	ATGPDSPSPVPLPPGKPALPGADGTPFGCPP	EGGTASVATGPDSPSPVPLPPGK(0.971)PALPGADGTPFGCPPGRK(0.029)
Q6STE5	169	1	98.9076	106.99	K	KRKLRLYISNTFNPAKPDAEDSDGSIASWEL	LYISNTFNPAK(1)PDAEDSDGSIASWELR
Q6T4R5	489	0.834597	7.02958	63.277	K	ASLSHSAGNISALADKGDTMFTPAVSSRTRS	GQSIAASLSH(0.165)SAGNISALADK(0.835)GDTMFTPAVSSR
Q6U841	451	0.999331	34.3288	46.106	K	IRIEPPKNVPSQEKRKIPAVPNGTAAHGEAE	R(0.999)K(0.999)IPAVPNGTAAH(0.988)GEAEPH(0.103)GGH(0.048)SGPELQR(0.862)
Q6V0I7	4771	0.999999	59.1104	81.765	K	PQAMASHGSRPGSRLKQPIGQIPLESSPPVG	LK(1)QPIGQIPLESSPPVGLSIEEVER
Q6VMQ6	676	0.999905	41.4372	117.83	K	KKRHEHPPNPPVSPGKTVNDVNSNNNMSYRN	RHEHPPNPPVSPGK(1)TVNDVNSNNNMSYR
Q6WCQ1	976	0.997748	26.4654	154.13	K	RLKEQLKAATEALGEKSPDSATVSGYDIMKS	AATEALGEK(0.998)SPDSATVSGYDIMK(0.002)
Q6WCQ1	541	0.999894	39.7445	93.495	K	QKRSRARERRREGRSKTFDWAEFRPIQQALA	SK(1)TFDWAEFRPIQQALAQER
Q6WCQ1	211	0.993453	22.0188	59.399	K	VPTTKSTLWQEEMRTKDQPDGSSLSPAQSPS	TK(0.993)DQPDGSSLSPAQSPSQSQPPAASSLREPGLESK(0.006)
Q6WKZ4	352	0.82997	7.2794	53.819	K	DSSPSSSPSPKGFRKKHLFSSTENLAAGSWK	K(0.83)H(0.015)LFSSTENLAAGSWK(0.155)EPAEGGGLSSDR
Q6ZMT1	47	1	110.721	135.86	K	QRFKRSLSLKTILRSKSLENFFLRSGSELKC	SK(1)SLENFFLR
Q6ZN55	155	1	87.3386	93.404	K	LWLNHRQTHLRATPTKAPAPVVLGSPVVLGP	ATPTK(1)APAPVVLGSPVVLGPPVGQAR
Q6ZQQ6	1340	0.979861	16.6056	55.302	K	REDMIQGVTQEVIRHKEVMPREEEQAQKKAR	EDMIQGVTQEVIR(0.98)H(0.962)K(0.98)EVMPR(0.078)
Q70Z35	580	0.999987	48.7985	150.09	K	SDEEMEGSNMKHRLMKHDLKVVENVIAKSLL	LMK(1)H(1)DLKVVENVIAK
Q71F56	925	0.970433	17.2305	77.221	K	LTEFKMEVEDGLGSPKPEEIKDFSYVHKVPS	MEVEDGLGSPK(0.97)PEEIK(0.011)DFSYVHK(0.018)
Q71RC2	589	1	139.139	217.67	K	GLNQTTIPVSPPSTTKPSRASTASPCNNNIN	DGLNQTTIPVSPPSTTK(1)PSR
Q71RG4	212	1	70.6796	70.68	K	GALKSKYFPGQESQMKLIYQGRLLQDPARTL	YFPGQESQMK(1)LIYQGR(1)LLQDPAR(1)
Q76FK4	347	0.867812	7.45354	60.345	K	DPFEVVRDDFKSGVHKLHSLIGLGIKNRVSC	SGVH(0.868)K(0.868)LH(0.265)SLIGLGIK(1)
Q7L4I2	84	0.999724	32.0145	69.672	K	EGRRHESKDKSSKKHKSEEHNDKEHSSDKGR	H(1)K(1)SEEH(0.878)NDK(0.561)EH(0.561)SSDK(1)
Q7LFX5	263	1	51.9416	51.942	K	FRLRCLPHFYIIGQPKCGTTDLYDRLRLHPE	CLPH(1)FYIIGQPK(1)CGTTDLYDR(1)LR(1)
Q7RTP6	1370	0.997459	28.3158	82.034	K	TPAFRPVSLKSYSVEKSPQDEGLHLLKPLSI	SYSVEK(0.997)SPQDEGLH(0.001)LLK(0.001)PLSIPK(0.001)
Q7Z2K8	613	0.991964	20.9143	116.74	K	AEAIPEGKVGSLPLEKGSPVTTTKADPRASG	VGSLPLEK(0.992)GSPVTTTK(0.008)
Q7Z2W4	374	1	126.766	131.11	K	WKSLTSWTNDQGARRKTVFSPTLPAARSSLG	K(1)TVFSPTLPAAR
Q7Z333	909	0.999946	42.6932	199.12	K	KELIPFTEMTNASEKKSSPFKDLMTVPESRD	K(1)SSPFKDLMTVPESR
Q7Z3B3	899	0.902368	9.65791	87.091	K	EILTPSWREVDLQSLKGSPDEENEEIEDLSD	EVDLQSLK(0.902)GSPDEENEEIEDLSDAAFAALHAK(0.098)
Q7Z3B3	267	1	66.2598	130.56	K	TDSSSNLGGVKLEGKKSPLSSILFSALDSDT	K(1)SPLSSILFSALDSDTR
Q7Z3U7	1184	0.999998	56.9767	60.51	K	FQEILQIVSPVRDSDKPETPPVVNVPVPVLI	DSDK(1)PETPPVVNVPVPVLIGPISGMSR
Q7Z422	38	1	113.675	130.47	K	LEKKLKITQKESRKSKSPPKVPIVIQDDSLP	SK(1)SPPK(1)VPIVIQDDSLPAGPPPQIR
Q7Z422	42	1	116.919	137.72	K	LKITQKESRKSKSPPKVPIVIQDDSLPAGPP	SK(1)SPPK(1)VPIVIQDDSLPAGPPPQIR
Q7Z434	136	1	80.0684	111.72	K	TPAAAHSIPYNSCREKEPSYPMPVQETQAPE	EK(1)EPSYPMPVQETQAPESPGENSEQALQTLSPR
Q7Z460	691	1	77.2462	78.324	K	SANPAGAGSRSSSPGKLLGSGYGGLTGGSSR	SSSPGK(1)LLGSGYGGLTGGSSR
Q7Z4Q2	10	0.813266	6.56187	71.907	K	______MGKSRTKRFKRPQFSPTGDCQAEAA	FK(0.813)R(0.179)PQFSPTGDCQAEAAAAANGTGGEEDDGPAAELLEK(0.007)
Q7Z569	120	0.999282	31.4566	76.415	K	DHSKECINAAPDSPSKQLPDQISFFSGNPSV	ECINAAPDSPSK(0.999)QLPDQISFFSGNPSVEIVHGIMHLYK(0.001)
Q7Z5K2	911	0.99926	33.3494	80.109	K	QQYNRAEDSICLADSKPLPHQNVTNHVGKAV	AEDSICLADSK(0.999)PLPHQNVTNHVGK
Q7Z699	78	0.910695	10.085	79.713	K	ERLRDKMVVLECMLKKDLIYNKVTPTFHHWK	K(0.911)DLIYNK(0.089)
Q7Z6B7	951	0.800917	6.04555	63.442	K	RRSTSSGQYTGFNDHKPLDPETIAQDIEETM	STSSGQYTGFNDH(0.199)K(0.801)PLDPETIAQDIEETMNTALNELR
Q7Z6B7	1039	1	72.4097	80.752	K	IRRSTSSSSDTMSTFKPMVAPRMGVQLKPPA	STSSSSDTMSTFK(1)PMVAPR
Q7Z6E9	1254	0.999243	31.2226	121.19	K	SSKVKQEKVKGKVRRKVTGTEGSSSTLVDYT	RK(0.999)VTGTEGSSSTLVDYTSTSSTGGSPVR(0.001)
Q86TC9	380	1	65.0692	76.237	K	DSEGDPNKEEMNRIQKPNEVSSPPTTSAVIP	IQK(1)PNEVSSPPTTSAVIPPAVPQAQHLVAQPR
Q86TC9	760	0.999992	51.1486	148.13	K	FTLSSTPQTIQRTVSKESLLVSHPSVQTKSP	TVSK(1)ESLLVSHPSVQTK
Q86UE4	303	0.993448	21.8083	77.66	K	EKSVKLSSQISAGEEKWNSVSPASAGKRKTE	LSSQISAGEEK(0.993)WNSVSPASAGK(0.007)R
Q86UE4	314	1	119.584	158.34	K	AGEEKWNSVSPASAGKRKTEPSAWSQDTGDA	WNSVSPASAGK(1)R
Q86UU0	95	0.992359	21.1354	80.702	K	HGAKANQISPSNSSLKNPQAGVPPFSSLKGK	ANQISPSNSSLK(0.992)NPQAGVPPFSSLK(0.008)
Q86UU0	933	0.835004	7.32767	113.22	K	TISINQMGSPGMGHLKSPTLSQVHSPLVTSP	RPSDLTISINQMGSPGMGH(0.154)LK(0.835)SPTLSQVH(0.003)SPLVTSPSANLK(0.008)
Q86UU0	953	0.995214	24.4651	52.35	K	SQVHSPLVTSPSANLKSPQTPSQMVPLPSAN	SPTLSQVH(0.001)SPLVTSPSANLK(0.995)SPQTPSQMVPLPSANPPGPLK(0.004)
Q86UU0	974	0.999698	35.2041	73.389	K	SQMVPLPSANPPGPLKSPQVLGSSLSVRSPT	SPQTPSQMVPLPSANPPGPLK(1)SPQVLGSSLSVR
Q86UU1	215	1	144.893	210.07	K	IMDSLVLEEPGAAGKKPAATSPLSPMANGGR	K(1)PAATSPLSPMANGGR
Q86UY6	169	1	53.168	53.168	K	FLIQILQLMANSTQMKKVMLTVFKHNHGAYQ	FLIQILQLMANSTQMK(1)K(1)
Q86UY8	273	1	67.1018	76.301	K	HIKGIMYRAIEADIEKYICYAEQTRAVLAKL	GIMYRAIEADIEK(1)YICYAEQTR(1)
Q86V15	1476	0.997614	23.36	76.927	K	RENCGYKFCGRTHMYKHAQHHDRVDNLVLDD	FCGR(0.04)TH(0.96)MYK(0.998)H(0.998)AQH(0.502)H(0.502)DR(0.001)
Q86V25	296	0.999932	41.7413	85.554	K	KELEKYARDMRMKILKPASAHSPTQVRSRGK	ILK(1)PASAHSPTQVR
Q86V48	656	1	63.8363	106.87	K	HEALRCRVIKSSGREKPDSDDDLDIASLVTA	EK(1)PDSDDDLDIASLVTAK
Q86VQ1	408	0.99962	34.1964	95.854	K	DSGSSSPLPKYASSPKPNNSYMFKREPPEGC	YASSPK(1)PNNSYMFK
Q86W92	430	0.87639	8.50644	52.402	K	ATVSMETSEKSKLTPKPETSFEENDGNIILG	LTPK(0.876)PETSFEENDGNIILGATVDTQLCDK(0.124)
Q86WB0	343	0.999999	61.1031	79.663	K	RSQDATFSPGSEQAEKSPGPIVSRTRSWDSS	SQDATFSPGSEQAEK(1)SPGPIVSR
Q86XI2	493	0.999994	52.5746	78.488	K	AFVDMLLKIKAVRAAKFWKICPMEHILVRLE	AAK(1)FWK(1)ICPMEHILVR
Q86XI2	496	0.999999	60.7847	78.488	K	DMLLKIKAVRAAKFWKICPMEHILVRLETDS	AAK(1)FWK(1)ICPMEHILVR
Q86YC2	784	0.999998	56.7981	117.48	K	LASDTKQFDSSGSPAKPHTTLQVSGRQGQPT	QFDSSGSPAK(1)PHTTLQVSGR
Q86YR7	655	0.998601	27.4926	41.483	K	SIIDGYITPMDFIWLKHLIPDVLQNNKDFLF	SIIDGYITPMDFIWLK(0.999)H(0.996)LIPDVLQNNK(0.215)DFLFGNIR(0.79)
Q86YV5	789	0.999288	31.4738	55.033	K	GPSSELAHSPTNSGKKLFAPVPFPSGSTEDV	K(0.999)LFAPVPFPSGSTEDVSPSGPQQPPPLPQK(0.001)
Q8IV01	95	1	96.1542	99.923	K	AWNAQRASTRGPPSRKGSLSIEDTFESISEL	K(1)GSLSIEDTFESISELGPLELMGR
Q8IVF2	1444	0.999981	46.4304	58.776	K	PEIDIKGPKLDLKDPKVEVTAPDVEVSLPSV	DPK(1)VEVTAPDVEVSLPSVEVDVEAPGAK(0.817)LDGGR(0.183)
Q8IVF2	1469	0.817349	6.50775	58.776	K	VSLPSVEVDVEAPGAKLDGGRLEEDMSLADK	DPK(1)VEVTAPDVEVSLPSVEVDVEAPGAK(0.817)LDGGR(0.183)
Q8IVH2	445	0.999956	43.6059	96.455	K	ASLHGGGPARRRSSDKFCSPISSELAQNHEF	SSDK(1)FCSPISSELAQNHEFYK
Q8IW50	106	0.999974	45.8627	66.36	K	VPNKGYSSLDQSPDEKPLVALDTDSDDDFDM	GYSSLDQSPDEK(1)PLVALDTDSDDDFDMSR
Q8IWB9	724	0.99837	30.3317	100.88	K	KLKSEIKKSSGVSGGKPGLLPAHSRHNSPSG	SSGVSGGK(0.998)PGLLPAH(0.001)SR(0.001)
Q8IWI9	613	1	175.359	252.2	K	KVVNANQNASPNVPGKRGRPRKLKLCKAGRP	VVNANQNASPNVPGK(1)R
Q8IWJ2	1101	0.99999	49.9864	96.665	K	EVQILEVQRAKAMVDKELEAEKLQKEQKIKE	AMVDK(1)ELEAEKLQK(1)
Q8IWX8	185	0.997656	26.3138	56.9	K	KDAISAGKNWMFSNAKSPPHCELMAGHLRNR	NWMFSNAK(0.998)SPPH(0.002)CELMAGHLR
Q8IXQ5	8	0.985673	18.2885	80.455	K	________MAASGVEKSSKKKTEKKLAAREE	MAASGVEK(0.986)SSK(0.98)K(0.034)
Q8IXQ5	11	0.98037	16.9208	80.455	K	_____MAASGVEKSSKKKTEKKLAAREEAKL	MAASGVEK(0.986)SSK(0.98)K(0.034)
Q8IYB3	763	1	72.7691	114.66	K	SSSRSVSGSPEPAAKKPPAPPSPVQSQSPST	K(1)PPAPPSPVQSQSPSTNWSPAVPVK(1)
Q8IYH5	605	0.9664	14.5883	136.93	K	RVKLVFDKVGLPARPKSPLDPKKDGESLSYS	VGLPARPK(0.966)SPLDPK(0.034)
Q8IYL3	174	0.999958	43.7189	66.519	K	VQKQNEPGLQTEDVQKPPLQMDNSVFLDDDS	QNEPGLQTEDVQK(1)PPLQMDNSVFLDDDSNQPMPVSR
Q8IZD2	1069	1	92.6447	139.46	K	DSTHSGRGTMYSSWVKSPDRTGVNFSVNSNL	GTMYSSWVK(1)SPDR
Q8IZD2	1356	0.999637	34.3954	87.429	K	PDTSQNTCKSPPKMSKPGSPGSVIPAQAHGK	MSK(1)PGSPGSVIPAQAHGK
Q8IZE3	525	0.999924	41.1878	54.003	K	KNTSEDSENFPSSSKKSEEWPDWSEPEEPEN	K(1)SEEWPDWSEPEEPENQTVNIQIWPR
Q8IZH2	1655	0.999119	30.5469	86.261	K	NIVKVSPRESSSASLKSSPIAQPASSFQVET	ESSSASLK(0.999)SSPIAQPASSFQVETASQGHSISHHK(0.001)
Q8IZL2	533	0.887451	10.5734	40.872	K	GPSAQGGHLDVLMQQKPQDLSRSFINNPHPA	AGPSAQGGH(0.015)LDVLMQQK(0.887)PQDLSR(0.078)SFINNPH(0.015)PAMEPR(0.006)
Q8IZP0	180	1	130.106	195.6	K	PARTGTLSRTNPPTQKPPSPPMSGRGTLGRN	TNPPTQK(1)PPSPPMSGR
Q8IZT6	657	1	96.0675	96.067	K	LSIFRTPISKTNKRTKPIIAVAQSSLTFIKP	TK(1)PIIAVAQSSLTFIK(1)PLK(1)
Q8IZT6	671	1	96.0675	96.067	K	TKPIIAVAQSSLTFIKPLKTDIPRHPMPFAA	TK(1)PIIAVAQSSLTFIK(1)PLK(1)
Q8N108	486	0.999664	34.7272	154.34	K	KSERPAKRRRVNSNGKESPGSSEFFQEAVSH	R(0.002)VNSNGK(1)ESPGSSEFFQEAVSHGK(0.999)
Q8N1G4	508	0.913847	10.2882	114.51	K	KDVMDALILKMAEMKKYTLENKEEGSLSDTE	K(0.914)YTLENK(0.086)EEGSLSDTEADAVSGQLPDPTTNPSAGK(0.001)
Q8N1G4	514	1	68.7025	122.21	K	LILKMAEMKKYTLENKEEGSLSDTEADAVSG	YTLENK(1)EEGSLSDTEADAVSGQLPDPTTNPSAGK
Q8N2M8	355	0.999979	46.8424	55.965	K	AAAAAAAAASGVTTGKPPAPPQPGGPAPGRN	ITFITSFGGSDEEAAAAAAAAAASGVTTGK(1)PPAPPQPGGPAPGR
Q8N2Y8	6	0.995984	24.6583	95.71	K	__________MDSPPKLTGETLIVHHIPLVH	MDSPPK(0.996)LTGETLIVH(0.003)H(0.001)IPLVHCQVPDR
Q8N3D4	178	0.999999	61.0409	83.773	K	ATDDDMQSLASLMSVKPSDVGNLDDFAESDE	ATDDDMQSLASLMSVK(1)PSDVGNLDDFAESDEDEAHGPGAPEAR
Q8N3V7	836	0.989681	19.8187	110.32	K	IKEPAKVSPRAASPAKPSSLDLVPNLPKGAL	AASPAK(0.99)PSSLDLVPNLPK(0.01)
Q8N556	333	1	116.281	140.79	K	KVTGKKITKIISLGKKKPSTDEQTSSAEEDV	K(1)K(1)PSTDEQTSSAEEDVPTCGYLNVLSNSR
Q8N556	334	1	113.423	139	K	VTGKKITKIISLGKKKPSTDEQTSSAEEDVP	K(1)K(1)PSTDEQTSSAEEDVPTCGYLNVLSNSR
Q8N608	522	1	89.9108	89.911	K	DNPAKYFILESNSMLKEAILKKKIGKPEIKI	YFILESNSMLK(1)EAILK(1)
Q8N6G6	1574	0.955336	13.3025	80.412	K	RSCGGGVQTRRVTCQKLKASGISTPVSNDMC	VTCQK(0.955)LK(0.045)ASGISTPVSNDMCTQVAK
Q8N7R7	119	1	120.643	149.42	K	KSNHLNHVSPGQLTKKYSSCSTIFLDDSTVS	K(1)YSSCSTIFLDDSTVSQPNLR
Q8N999	212	0.86995	7.67068	64.68	K	IGTNINGNPYGLGSKKHPLHLLIPHGAFQIR	K(0.87)H(0.272)PLH(0.857)LLIPH(0.016)GAFQIR(0.897)NLPSLK(0.088)
Q8N9M1	386	1	82.645	82.645	K	TSTKSKSSAEVKVTIKRTLVGPRGSSSSEGL	VTIK(1)R(1)TLVGPR(1)
Q8NC51	228	0.99927	31.3659	129.76	K	EDKRGGSGSHNWGTVKDELTESPKYIQKQIS	GGSGSHNWGTVK(0.999)DELTESPK(0.001)
Q8NCF5	188	0.873013	8.3726	286.57	K	SPWKTKLRTKDKEEKKKTEFLDLDNSPLSPP	K(0.873)K(0.127)TEFLDLDNSPLSPPSPR
Q8ND04	664	0.968732	17.8038	48.392	K	NFPVFEPSTPDPAPAKNESSPAPPDSDADKL	LDHINFPVFEPSTPDPAPAK(0.969)NESSPAPPDSDADK(0.016)LK(0.015)
Q8ND24	45	0.99601	23.9729	101.72	K	GLPDGLSTKDSAQKQKNSPLLSVSSQTITKE	QK(0.996)NSPLLSVSSQTITK(0.004)
Q8ND56	191	0.999998	57.8662	88.395	K	QLSQGRSSPQLDPLRKSPTMEQAVQTASAHL	K(1)SPTMEQAVQTASAHLPAPAAVGR
Q8NDV7	939	0.954022	13.17	88.163	K	DPPKSNQSLGWGDSSKPVSSPDWNKQQDIVG	SNQSLGWGDSSK(0.954)PVSSPDWNK(0.046)
Q8NEF9	206	0.780921	8.02699	93.729	K	MEHGPKAVTIANSPSKPSEKDSVVSLESQKT	AVTIANSPSK(0.781)PSEK(0.096)DSVVSLESQK(0.123)
Q8NEM7	440	0.990163	20.0288	109.77	K	HSSSGSASLSQVSPGKETDQTETVSVQSSVL	MSHSSSGSASLSQVSPGK(0.99)ETDQTETVSVQSSVLGK(0.01)
Q8NEN9	532	0.999999	61.835	154.95	K	SLSHSPKRVPTTLSIKPLGAISPVLNRKLAV	RVPTTLSIK(1)PLGAISPVLNR
Q8NEY1	756	0.999874	39.0075	70.986	K	AKAKAVALDSDNISLKSIGSPESTPKNQASH	AVALDSDNISLK(1)SIGSPESTPK
Q8NF91	3606	0.991242	21.6491	80.361	K	TQFNNVVNKLRLMEQKFQQVDEWLKTAEEKV	LMEQK(0.991)FQQVDEWLK(0.002)TAEEK(0.007)
Q8NFC6	2474	0.984858	18.1319	105.37	K	AEEKNVLLNSLQKEDKSPETGTAGGSSTASY	NVLLNSLQK(0.015)EDK(0.985)SPETGTAGGSSTASYSAGR
Q8NFJ5	348	0.864755	8.5338	143.58	K	KEFSIPRAHAWPSPYKDYEVKKEGS______	AH(0.014)AWPSPYK(0.865)DYEVK(0.121)
Q8NFQ8	110	0.922804	11.8962	115.84	K	LDGGKGHHLPSENLGKEPLDPDPSHSPSDKV	GH(0.001)H(0.003)LPSENLGK(0.923)EPLDPDPSH(0.06)SPSDK(0.013)VGR
Q8NHV4	471	0.78725	6.84942	71.909	K	VLHSSPLNVFMGSPGKEENENRDLTAESKKI	K(0.05)NPVTSSTSVLH(0.163)SSPLNVFMGSPGK(0.787)EENENR
Q8NI08	189	0.999846	38.1255	53.147	K	PGATVSPSSSDAEYDKLPDADLARKALKPIE	LSSSSPGATVSPSSSDAEYDK(1)LPDADLAR
Q8NI27	1218	0.998669	28.7532	118.93	K	GPGGGPSSSSIGSASKSDESSTEETDKSRER	NAVASVQNGPGGGPSSSSIGSASK(0.999)SDESSTEETDK(0.001)SR
Q8NI27	1392	1	162.548	234.79	K	ENVKGGEKTPVSGSLKSPVPRSDIPEPEREQ	TPVSGSLK(1)SPVPR
Q8NI77	683	0.960497	13.9512	71.002	K	RRKLMPSPLKGQHTLKSPPSQSVQLNDSLSK	GQH(0.001)TLK(0.96)SPPSQSVQLNDSLSK(0.039)
Q8NI77	677	0.895956	9.35074	96.489	K	PTEKRTRRKLMPSPLKGQHTLKSPPSQSVQL	LMPSPLK(0.896)GQHTLK(0.104)
Q8TAP6	85	1	75.0768	114.84	K	NFVTDSVEQELPSSPKQPICFDRQSTLKKTN	ELNFVTDSVEQELPSSPK(1)QPICFDR
Q8TAT6	16	0.999929	41.4637	58.831	K	MAESIIIRVQSPDGVKRITATKRETAATFLK	MAESIIIR(0.999)VQSPDGVK(1)R(0.001)
Q8TAV0	190	0.925289	12.6134	48.655	K	LSTSSIQNEIPKKKSKFESITTNGDSFSPDL	SK(0.925)FESITTNGDSFSPDLALDSPGTDH(0.024)FVIIAQLK(0.051)
Q8TBF4	141	0.799432	6.00519	67.405	K	GEREPPKKKEKKKKKKAPEPEEEIEEVEESE	K(0.799)APEPEEEIEEVEESEDEGEDPALDSLSQAIAFQQAK(0.201)
Q8TBF4	140	0.756008	5.06856	67.385	K	LGEREPPKKKEKKKKKKAPEPEEEIEEVEES	K(0.756)K(0.235)APEPEEEIEEVEESEDEGEDPALDSLSQAIAFQQAK(0.009)
Q8TBY8	352	1	69.716	69.716	K	EAVSEQKRNIMKDMMKLELDLHGLREETSAH	DMMK(1)LELDLH(1)GLR(1)
Q8TCC7	311	0.999929	41.5022	100.73	K	ELKLNLQKEISLAKAKYTASDLFRIPMLRRM	AK(1)YTASDLFRIPMLR
Q8TDD1	58	0.999826	37.6552	103.9	K	DGEFEIQAEDDARARKLGPGRPLPTFPTSEC	K(1)LGPGRPLPTFPTSECTSDVEPDTR
Q8TDI7	9	0.977048	17.198	87.298	K	_______MSHQVKGLKEEARGGVKGRVKSGS	MSHQVK(0.004)GLK(0.977)EEAR(0.019)
Q8TDM6	870	0.905903	10.1103	80.877	K	RKEPGPPGGSSSFLHKPFPGGPLQVCPQACP	K(0.006)EPGPPGGSSSFLH(0.088)K(0.906)PFPGGPLQVCPQACPSASER
Q8TDM6	935	0.943708	12.2439	86.771	K	ETEVGPCGVGEASLDKADSEGSNSGGTWPKA	RPLLPFETEVGPCGVGEASLDK(0.944)ADSEGSNSGGTWPK(0.056)
Q8TDM6	987	0.971792	16.087	77.894	K	SIFDPNTFKRPQTPPKIDYLLPGPGPAHSPQ	R(0.024)PQTPPK(0.972)IDYLLPGPGPAHSPQPSK(0.004)
Q8TDW5	354	1	86.3794	92.238	K	DTVSIRSKSVPGALDKDSLEETEESIDALVS	SVPGALDK(1)DSLEETEESIDALVSSQLSTNTHR
Q8TDY2	429	0.867293	5.72335	49.618	K	LSHANQLMIMLQNHRKLLDIKQKCTTAKQEL	DASVLPDLCLSH(0.037)ANQLMIMLQNH(0.544)R(0.544)K(0.867)LLDIK(0.008)
Q8TEM1	1872	1	90.0832	105.46	K	AASSPTSPNALPPARKASPPSGLWSPAYASH	K(1)ASPPSGLWSPAYASH
Q8TEQ0	375	0.999988	50.2142	134.34	K	NSSGRKHRGHSESPEKPLEGNTCLSQMHSWA	GHSESPEK(1)PLEGNTCLSQMHSWAPLK
Q8TEW0	886	1	106.803	115.31	K	AGSPSRDVGPSLGLKKSSSLESLQTAVAEVT	K(1)SSSLESLQTAVAEVTLNGDIPFHRPR
Q8TF01	218	0.999387	32.1246	171.52	K	SSFRDRQRSPIALPVKQEPPQIDAVKRRTLP	QRSPIALPVK(0.999)QEPPQIDAVK(0.001)
Q8WUM0	35	1	76.0275	119.62	K	LAGLGPGSTPRTASRKGLPLGSAVSSPVLFS	K(1)GLPLGSAVSSPVLFSPVGR
Q8WVN6	181	1	89.8046	89.805	K	FAWYRCRCSQQRREKKFFLLEPQMKVAALRA	K(1)FFLLEPQMK(1)
Q8WWH4	208	0.998515	28.5151	77.192	K	GHKNIVLKLLELGANKMLQTKDGKMPSEIAK	LLELGANK(0.999)MLQTK(0.001)DGK
Q8WWI1	1476	0.999997	55.7753	164.93	K	SGAELERQQILQEMRKRTPLHNDNSWIRQRS	K(1)RTPLHNDNSWIR
Q8WWI1	1496	1	93.2067	110.35	K	HNDNSWIRQRSASVNKEPVSLPGIMRRGESL	SASVNK(1)EPVSLPGIMR
Q8WWM7	606	0.783174	5.60724	45.666	K	PMGSPVSSKTESVSDKEDKPPLAPSGGTEGP	TESVSDK(0.783)EDK(0.215)PPLAPSGGTEGPEQPPPPCPSQTGSPPVGLIK(0.001)
Q8WWY3	470	0.772178	5.30122	58.581	K	TPLQGLEIVNPQAAEKKVAEANQKYFSSMAE	SSGTASSVAFTPLQGLEIVNPQAAEK(0.772)K(0.228)
Q8WX92	555	1	60.4741	73.831	K	LYSQLGEKLEQLDHRKPSPAQAAETPALELP	K(1)PSPAQAAETPALELPLPSVPAPAPL
Q8WX93	644	0.973639	16.9562	87.863	K	SNKSLPTPAVLLSPTKEPPPLLAKPKLDPLK	SLPTPAVLLSPTK(0.974)EPPPLLAK(0.007)PK(0.02)
Q8WXH0	6380	0.930945	11.4299	63.491	K	TDMEDPREIQTDSWRKRGESEEPSSPQSLCH	K(0.931)R(0.067)GESEEPSSPQSLCH(0.002)LVAPGHER
Q8WXH0	6358	0.994228	22.3695	62.052	K	FHRRLTSCTPGLEDEKEASENETDMEDPREI	LTSCTPGLEDEK(0.994)EASENETDMEDPR(0.006)EIQTDSWR
Q8WY36	158	0.99655	24.6074	137.39	K	ANPGYKWCPTTNKPVKSPTPTVNPRKKLWAF	WCPTTNK(0.003)PVK(0.997)SPTPTVNPR
Q8WYA6	388	1	88.5841	120.84	K	FVDILGLRTIFPLFMKSPRKIKKVGTTEKEH	TIFPLFMK(1)SPR
Q8WYP3	601	0.963795	14.0854	75.566	K	QIDVVLEKAMHKCILKPLKGHVEAMLKDFHM	AMH(0.964)K(0.073)CILK(0.964)PLK(1)
Q8WYP5	1527	0.973744	15.6926	77.401	K	DSPPDTQEIHVIEQEKLEAQDSGEEARNLSF	LPISDSPPDTQEIH(0.026)VIEQEK(0.974)LEAQDSGEEAR
Q8WYP5	1141	1	119.971	162.61	K	PRPSQCSEFIQQSSMKSPLYLVSRSLPSSSQ	PSQCSEFIQQSSMK(1)SPLYLVSR
Q8WYP5	1158	1	183.643	212.43	K	PLYLVSRSLPSSSQLKGSPQAISRASELHLL	SLPSSSQLK(1)GSPQAISR
Q8WYP5	1286	0.953678	13.1685	160.2	K	KSKDRTTSFFLNSPEKEHQEMDEGSQSLEKL	TTSFFLNSPEK(0.954)EHQEMDEGSQSLEK(0.046)
Q8WZ42	12731	0.998306	27.5534	43.732	K	PLTASPDCEIIEDGKKHILILHNCQLGMTGE	K(0.998)H(0.998)ILILH(0.997)NCQLGMTGEVSFQAANAK(0.971)SAANLK(0.036)
Q8WZ42	12755	0.970644	15.1649	43.732	K	QLGMTGEVSFQAANAKSAANLKVKELPLIFI	K(0.998)H(0.998)ILILH(0.997)NCQLGMTGEVSFQAANAK(0.971)SAANLK(0.036)
Q92503	245	0.813772	6.40458	104.15	K	PVVGTPDDKLDADYIKRYLGDLTPLQESCLI	EGLSGDALSSPSAPEPVVGTPDDK(0.186)LDADYIK(0.814)R
Q92538	1770	1	89.4232	178.05	K	PPPEIPSELGACDFEKPESPRAASSSSPGSP	TPGHPPPPEIPSELGACDFEK(1)PESPR
Q92540	780	0.999901	43.4586	139.28	K	TQQQQSPTKAVPALGKSPPHHSGFQQYQQAD	AVPALGK(1)SPPHHSGFQQYQQADASK
Q92547	164	1	91.318	91.318	K	GEVGSKKYLVAANLKKPILLPSWIKTLWEKS	K(1)PILLPSWIK(1)
Q92560	368	0.808094	6.24373	93.712	K	IVQRLPAFLDNHNYAKSPMQEEEDLAAGVGR	LPAFLDNH(0.192)NYAK(0.808)SPMQEEEDLAAGVGR
Q92610	83	0.774316	5.35418	86.213	K	VIVKNTSRQESFEAEKDHITPSLLHNGFRGS	QESFEAEK(0.774)DH(0.226)ITPSLLHNGFR
Q92615	521	0.989528	19.7541	61.438	K	EEKFTSSQTQSPTPPKPPSPSFELGLSSFPP	FTSSQTQSPTPPK(0.99)PPSPSFELGLSSFPPLPGAAGNLK(0.01)
Q92621	1150	0.999653	36.5641	101.74	K	HTQRLLHLLLDDMPVKPYSDGEGGIEDENRS	LLHLLLDDMPVK(1)PYSDGEGGIEDENR
Q92625	625	0.999999	62.2804	78.352	K	TSKPKAELKLSRSLSKSDSDLLTCSPTEDAT	SLSK(1)SDSDLLTCSPTEDATMGSR
Q92667	448	0.866573	10.3775	73.296	K	KTYVSCLKSLLSSPTKDSKPNISAHHISLAS	SLLSSPTK(0.867)DSK(0.079)PNISAH(0.025)H(0.029)ISLASCLALTTPSEELPDR
Q92734	155	0.997857	25.8799	66.331	K	TVDGREEKSASDSSGKQSTQVMAASMSAFDP	SASDSSGK(0.998)QSTQVMAASMSAFDPLK(0.17)NQDEINK(0.832)
Q92766	164	0.999701	35.2668	122.65	K	KDPNSATATAPPSPLKRRRLSSKRKLSHDAE	IHEKDPNSATATAPPSPLK(1)R
Q92766	41	0.971292	15.2935	79.445	K	SVGKVTENGGSPQGIKSPSKPPGPNRIGRRN	VTENGGSPQGIK(0.971)SPSK(0.029)PPGPNR
Q92769	404	0.868047	8.54096	86.073	K	AVHEDSGDEDGEDPDKRISIRASDKRIACDE	MLPH(0.01)APGVQMQAIPEDAVH(0.121)EDSGDEDGEDPDK(0.868)R
Q92785	241	0.999957	45.7292	124.31	K	YHYAHSHLAEEEGEDKEDSQPPTPVSQRSEE	NRPGLSYHYAHSHLAEEEGEDK(1)EDSQPPTPVSQR
Q92794	1860	1	103.127	136.26	K	LQGQMPVKGHISIRSKSAPLPSAAAHQQQLY	SK(1)SAPLPSAAAHQQQLYGR
Q92797	1160	1	120.781	148.89	K	QEKALKRQLEEEQKLKPGGVGAPSSSSPSPS	LK(1)PGGVGAPSSSSPSPSPSAR
Q92878	618	0.774085	5.34844	121.9	K	SSEQNKNHINNELKRKEEQLSSYEDKLFDVC	K(0.774)EEQLSSYEDK(0.226)LFDVCGSQDFESDLDR
Q92890	250	0.895248	9.31781	119.45	K	LDGKKKGVEPSPSPIKPGDIKRGIPNYEFKL	GVEPSPSPIK(0.895)PGDIK(0.105)R
Q92925	206	0.999481	32.8433	91.1	K	KRKLRIYISNTFSPSKAEGDSAGTAGTPGGT	IYISNTFSPSK(0.999)AEGDSAGTAGTPGGTPAGDK(0.001)
Q93098	217	0.958296	13.6133	76.051	K	REVGAHLKEKYHAALKVDLLQGAGNSAAGRG	YH(0.042)AALK(0.958)VDLLQGAGNSAAGR
Q96AC1	154	0.999411	32.2951	75.036	K	SLLKKPRDPTKKKKKKLDDQSEDEALELEGP	K(0.999)LDDQSEDEALELEGPLITPGSGSIYSSPGLYSK(0.001)
Q96AC1	341	0.99527	24.2336	124.96	K	KLSIMTSENHLNNSDKEVDEVDAALSDLEIT	LSIMTSENH(0.001)LNNSDK(0.995)EVDEVDAALSDLEITLEGGK(0.004)
Q96AG4	14	0.848705	7.48933	91.926	K	__MTKAGSKGGNLRDKLDGNELDLSLSDLNE	DK(0.849)LDGNELDLSLSDLNEVPVK(0.151)
Q96B01	326	1	70.3534	153.2	K	GGSRSSSSPLVVVSVKSPNQSLRLGLSRLAR	SSSSPLVVVSVK(1)SPNQSLR
Q96B97	516	0.918516	12.6688	87.674	K	LSSPDIFDSPSPEEDKEEHISLAHRGVDASK	R(0.031)PPSQSLTSSSLSSPDIFDSPSPEEDK(0.919)EEH(0.05)ISLAH(0.001)R
Q96BK5	154	0.764442	5.11247	66.72	K	SKTDLDCIFGKRQSKKTPEGDASPSTPEENE	K(0.764)TPEGDASPSTPEENETTTTSAFTIQEYFAK(0.236)
Q96BY7	1881	0.994704	22.3992	55.686	K	KLFSYAITEWLNDIKKNQLPGILGGVGPMHS	K(0.995)NQLPGILGGVGPMH(0.925)SLVQLVQGLK(0.08)
Q96D71	487	0.802446	6.96568	131.3	K	RTGSDHTNPTSPLLVKPSDLLEENKINSSVK	TGSDHTNPTSPLLVK(0.802)PSDLLEENK(0.036)INSSVK(0.161)
Q96ER9	129	0.915879	9.40491	82.202	K	GLVREAREDLEVHQAKLKEVRDRLDRVSRED	EAR(1)EDLEVH(0.818)QAK(0.916)LK(0.267)
Q96EV2	735	1	143.102	260.58	K	EMSSSRCSATPSAQVKPIVSASPPSRAVAGS	CSATPSAQVK(1)PIVSASPPSR
Q96F63	209	0.861682	7.97555	88.708	K	TQEELSARTPTHQPPKPGSPGRPACPLSNLL	TPTH(0.001)QPPK(0.862)PGSPGR(0.137)PACPLSNLLLQSYEER
Q96FS4	891	0.916028	10.3785	79.112	K	PLTQDRPGSPSGSEDKGNPAPELRASFLPRT	PSVPSADSETPLTQDR(0.084)PGSPSGSEDK(0.916)GNPAPELR
Q96GQ5	433	0.975325	15.983	66.023	K	VVVKETHEVLDMLFPKFLKGLQDAGWKTEKH	ETHEVLDMLFPK(0.975)FLK(0.025)
Q96GV9	33	0.931583	11.3406	117.8	K	FPGAEANSPGKAEAEKPRCSSTPCSPMRRTV	STLTTLPFPGAEANSPGK(0.068)AEAEK(0.932)PR
Q96HC4	359	0.819972	6.92025	66.467	K	TAAAAFKPVGSTGVIKSPSWQRPNQGVPSTG	PVGSTGVIK(0.82)SPSWQR(0.167)PNQGVPSTGR(0.013)
Q96II8	519	0.831571	6.93497	63.225	K	AVLDFVKQKASQSPQKQHPLLDGVDGECPFP	ASQSPQK(0.832)QH(0.168)PLLDGVDGECPFPSRR
Q96II8	422	1	67.5055	169.17	K	AYIEQRRISHEGSPVKPVAIREFQKTEDMRR	RISHEGSPVK(1)PVAIR
Q96IY1	227	0.77408	5.34832	96.312	K	HLQRIHQEVFSSCHRKPDAKPENFITQIETT	K(0.774)PDAK(0.226)PENFITQIETTPTETASR
Q96JG6	501	0.992115	19.5993	103.41	K	FKFMEQSRSPSVSPSKQPVSTSSKTVTLFEQ	FMEQSR(0.281)SPSVSPSK(0.992)QPVSTSSK(0.727)
Q96JM3	441	1	122.71	273.99	K	LSPEIRSPAGSPELRKPSGSPDLWKLSPDQR	K(1)PSGSPDLWK(1)LSPDQR
Q96JM3	450	1	115.663	174.59	K	GSPELRKPSGSPDLWKLSPDQRKTSPASLDF	K(1)PSGSPDLWK(1)LSPDQR
Q96JM3	280	1	115.532	222.11	K	PESRKSARTTSPEPRKPSPSESPEPWKPFPA	K(1)PSPSESPEPWK(1)PFPAVSPEPR
Q96JM3	291	1	101.548	165.19	K	PEPRKPSPSESPEPWKPFPAVSPEPRRPAPA	K(1)PSPSESPEPWK(1)PFPAVSPEPR
Q96JM3	399	0.958547	13.6406	126.71	K	PASPESWKSGPPELRKTAPTLSPEHWKAVPP	K(0.959)TAPTLSPEHWK(0.041)
Q96JM3	349	0.99236	21.4224	70.109	K	WKPAKPAPSVSPGPWKPIPSVSPGPWKPTPS	PAPSVSPGPWK(0.992)PIPSVSPGPWK(0.007)PTPSVSSASWK
Q96JM3	313	1	88.4304	169.6	K	PEPRRPAPAVSPGSWKPGPPGSPRPWKSNPS	RPAPAVSPGSWK(1)PGPPGSPR(1)
Q96JM3	381	1	74.3245	74.324	K	SSASWKSSSVSPSSWKSPPASPESWKSGPPE	SSSVSPSSWK(1)SPPASPESWK(1)
Q96K21	142	0.997396	25.8314	110.84	K	QCHEVLTRGSSANASKWSPPQNYKKRVAALE	GSSANASK(0.997)WSPPQNYK(0.003)
Q96KG9	687	0.999964	44.3858	48.576	K	VSRASQVSNSDHKSSKSPESDWSSWEAEGSW	SSK(1)SPESDWSSWEAEGSWEQGWQEPSSQEPPPDGTR
Q96KQ7	139	1	109.968	144.15	K	GSCPSRAKMSMTGAGKSPPSVQSLAMRLLSM	MSMTGAGK(1)SPPSVQSLAMR
Q96L91	350	1	79.9167	83.045	K	PLTSVGNTGMKKVPKKLEEIPPASPEMAQMR	K(1)LEEIPPASPEMAQMR
Q96LZ7	119	1	108.279	223.77	K	EEYIQDELGGKITVHKISPQHRARKRRLPTI	ITVHK(1)ISPQHR
Q96MW1	148	0.881398	9.77542	112.13	K	AQYADVTDEEDEADEKDDSGATTMNIGSDKL	K(0.026)AALLAQYADVTDEEDEADEK(0.881)DDSGATTMNIGSDK(0.093)
Q96MW1	128	0.85647	8.16965	80.073	K	IVVKPRMVSEEEKQRKAALLAQYADVTDEED	K(0.856)AALLAQYADVTDEEDEADEK(0.131)DDSGATTMNIGSDK(0.013)
Q96N67	21	0.988958	19.5214	131.35	K	AFAQKISRTVAAEVRKQISGQYSGSPQLLKN	K(0.989)QISGQYSGSPQLLK(0.011)
Q96NB3	344	1	63.0721	80.314	K	KNKLKEILTIKELQKKEEENADSDDEGELQD	K(1)EEENADSDDEGELQDLLSQDWR
Q96NW4	209	0.996175	26.7457	53.96	K	HLKMLAKQEAQMNLMKQAVEIYVHHEIYNLI	QEAQMNLMK(0.996)QAVEIYVH(0.119)H(0.424)EIYNLIFK(0.461)
Q96P16	144	1	80.9235	114.52	K	LYGDKKPRKRTYEQIKVDENENCSSLGSPSE	TYEQIK(1)VDENENCSSLGSPSEPPQTLDLVR
Q96P44	696	1	59.634	59.634	K	SPGEPGYMGLPGIQGKKGDKGNQGEKGIQGQ	GEPGATGSPGEPGYMGLPGIQGK(1)K(1)GDK(1)
Q96P44	697	1	59.634	59.634	K	PGEPGYMGLPGIQGKKGDKGNQGEKGIQGQK	GEPGATGSPGEPGYMGLPGIQGK(1)K(1)GDK(1)
Q96PC5	721	0.91991	10.6827	102.5	K	LVQKEYEGYEVESSLKDASFEKEATEAQSLE	EYEGYEVESSLK(0.92)DASFEK(0.079)EATEAQSLEATCEK(0.001)
Q96QC0	310	0.976051	17.0244	126.34	K	LNSAPVPGIKIKKKKKVLSPTAAKPSPFEGK	K(0.976)VLSPTAAK(0.019)PSPFEGK(0.005)
Q96QC0	318	0.921469	10.6944	130.47	K	IKIKKKKKVLSPTAAKPSPFEGKTSTEPSTA	VLSPTAAK(0.921)PSPFEGK(0.079)
Q96RL1	680	0.999957	46.5202	117.53	K	MQSSFTRRDLNESPVKSFVSISEATDCLVDF	DLNESPVK(1)SFVSISEATDCLVDFKK
Q96S90	103	0.815125	9.1901	73.936	K	TEPRDLFNGLDSEEEKDGEEKVHPSNSEVWP	DLFNGLDSEEEK(0.815)DGEEK(0.087)VH(0.098)PSNSEVWPHSTER
Q96ST3	252	0.978906	16.6672	92.623	K	APAQPAPQPPPAKVSKPSQLQAHTPASQQTP	VSK(0.979)PSQLQAH(0.021)TPASQQTPPLPPYASPR
Q96T37	769	0.997781	26.6008	129.06	K	PSTSTASSKLKSPSQKQDGGTAPVASASPKL	LK(0.002)SPSQK(0.998)QDGGTAPVASASPK
Q96T37	263	1	117.494	184.6	K	EAVYVSRRRSRSPLDKDTYPPSASVVGASVG	SR(1)SPLDK(1)DTYPPSASVVGASVGGHR
Q96T58	1064	0.999979	46.8151	82.476	K	SKKIKLDRLNTVASPKDCQELASISVGSGSR	LNTVASPK(1)DCQELASISVGSGSRPSSDLQAR
Q96T58	1825	0.983633	17.7888	95.365	K	PVAAKDKKPNKSKRSKTPVQAAAVSIVEKPV	SK(0.984)TPVQAAAVSIVEK(0.016)PVTR
Q96T60	130	0.910386	10.0719	64.144	K	QPDTPPGTPLVSQDEKRDAELPKKRMRKSNP	WEETR(0.09)TPESQPDTPPGTPLVSQDEK(0.91)R
Q96TC7	210	1	88.2941	91.819	K	DGEDEVSCETVKMGRKDSLDLEEEAASGASS	K(1)DSLDLEEEAASGASSALEAGGSSGLEDVLPLLQQADELHR
Q99459	380	0.999863	38.6322	75.897	K	EAQNLMALTNVDTPLKGGLNTPLHESDFSGV	ILQEAQNLMALTNVDTPLK(1)GGLNTPLH(1)ESDFSGVTPQR
Q99460	292	0.966364	14.5834	70.632	K	SVPGSTNTGTVPGSEKDSDSMETEEKTSSAF	TVGTPIASVPGSTNTGTVPGSEK(0.966)DSDSMETEEK(0.034)
Q99549	452	0.834849	7.03726	130.36	K	GLKTLKEIRNAFDLFKLTPEEKNDVSENNRK	NAFDLFK(0.835)LTPEEK(0.165)NDVSENNR
Q99549	81	0.997955	26.8951	69.986	K	DMKTEGGKVLYKVRWKGYTSDDDTWEPEIHL	WK(0.998)GYTSDDDTWEPEIHLEDCK(0.002)
Q99567	41	1	129.192	144.27	K	RLREGLKNQSPTEAEKPASSSLPSSPPPQLL	NQSPTEAEK(1)PASSSLPSSPPPQLLTR
Q99569	774	0.976768	18.5987	79.236	K	QARLLGLNELDDLLGKESPSKDSEPSCWGKK	LLGLNELDDLLGK(0.977)ESPSK(0.01)DSEPSCWGK(0.013)
Q99700	858	0.999994	51.8989	65.641	K	SFIENSSSNCTSGSSKPNSPSISPSILSNTE	DSFIENSSSNCTSGSSK(1)PNSPSISPSILSNTEHK(1)
Q99728	369	0.998948	29.7759	76.237	K	SENIPLPECSSPPSCKRKVGGTSGRKNSNMS	QTVPSENIPLPECSSPPSCK(0.999)R(0.001)
Q9BPW9	98	0.93069	11.2801	114.71	K	DVTDPENVKRTAQWVKNQVGEKGLWGLINNA	TAQWVK(0.931)NQVGEK(0.069)
Q9BQA1	3	1	102.169	206.46	K	_____________MRKETPPPLVPPAAREWN	K(1)ETPPPLVPPAAR
Q9BQG0	1289	0.941022	12.0291	211.83	K	QKQHQKALPKKGVLGKSPLSALARKKARLSL	K(0.059)GVLGK(0.941)SPLSALAR
Q9BQG0	1254	0.884921	11.5384	72.399	K	TRSPSTPAKSPKLQKKNQKPSQVNGAPGSPT	K(0.885)NQK(0.053)PSQVNGAPGSPTEPAGQK(0.062)
Q9BQQ3	212	1	45.8242	45.824	K	GYLHRIPTQPPSYHKKPPGTPPPSALPLGAP	K(1)PPGTPPPSALPLGAPPPDALPPGPTPEDSPSLETGSR(1)
Q9BRG2	143	1	88.6106	123.38	K	TLMDGPARIEPLRARKWSNSQPADLAHMGRS	K(1)WSNSQPADLAHMGR
Q9BRZ2	468	0.999999	60.0585	71.651	K	RGGRPNKKKKFKGRLKSISREPSPALGPNLD	LK(1)SISR(1)EPSPALGPNLDGSGLLPR
Q9BTA9	503	1	72.2458	118.47	K	GPVSQSATQQPVTADKQQGHEPVSPRSLQRS	QGPVSQSATQQPVTADK(1)QQGHEPVSPR
Q9BVC5	181	0.999983	47.5027	103.92	K	HNNNDAKQNHDLTHRKSPSGPVKSPPLSPVG	K(1)SPSGPVK(0.978)SPPLSPVGTTPVK(0.022)
Q9BVC5	188	0.977772	16.4333	202.61	K	QNHDLTHRKSPSGPVKSPPLSPVGTTPVKLK	K(1)SPSGPVK(0.978)SPPLSPVGTTPVK(0.022)
Q9BVJ6	24	0.9951	23.0763	47.605	K	SLLALSQQEELADLPKDYLLSESEDEGDNDG	LAESLLALSQQEELADLPK(0.995)DYLLSESEDEGDNDGER(0.005)
Q9BWH2	150	1	108.398	206.36	K	VEKDMKKAKEQLKIRKSNQIPTEVRSKAEEV	IRK(1)SNQIPTEVR
Q9BX63	209	1	127.683	162.64	K	KLNSPLEKINSFSPQKPPGHCSRCCCSTKQG	INSFSPQK(1)PPGHCSR
Q9BXB5	222	0.999953	44.8442	187.57	K	HLSVGAPGVVTITHHKSPAAARRAKSQYSGQ	HLSVGAPGVVTITHHK(1)SPAAAR
Q9BXF6	528	0.805917	9.48002	89.721	K	REAKDPTQKPSPHPVKPLSAAPVEGSPDRKQ	DPTQK(0.091)PSPH(0.091)PVK(0.806)PLSAAPVEGSPDR(0.012)
Q9BXP5	413	0.985233	18.2425	130.1	K	EEEWEKPKDAAGLECKPRPLHKTCSLFMRNI	PK(0.015)DAAGLECK(0.985)PR
Q9BXS6	316	0.99572	24.9144	84.159	K	PARKSAHVTVSGGTPKGEAVLGTHKLKTITG	SAHVTVSGGTPK(0.996)GEAVLGTH(0.001)K(0.003)
Q9BY89	1057	0.844881	7.45876	68.453	K	GVVLSGAESLLEHSRKITPPSSPHSLTSTLV	K(0.845)ITPPSSPH(0.152)SLTSTLVSLGHEEALEMAGSK(0.003)
Q9BY89	279	1	81.7313	162.49	K	VGKVPPTPPEKTWVRKPRPLSMDLTARFENK	K(1)PRPLSMDLTAR
Q9BYG3	216	0.945406	12.3847	89.893	K	RQTSTKGQVLRKKKKKVSGTLDTPEKTVDSQ	K(0.945)VSGTLDTPEK(0.055)TVDSQGPTPVCTPTFLER
Q9BYG3	226	0.999995	53.4459	70.112	K	RKKKKKVSGTLDTPEKTVDSQGPTPVCTPTF	VSGTLDTPEK(1)TVDSQGPTPVCTPTFLER
Q9BZ29	1278	0.99954	33.3673	134.76	K	NSLPERNSEKSNSLDKHQQSSTLGNSVVRCD	SNSLDK(1)HQQSSTLGNSVVR
Q9C0C2	173	0.999447	32.6996	124.81	K	ATTVEEILAKMEQPRKEVLASPDRLWGSRLT	K(0.999)EVLASPDR(0.001)LWGSR
Q9C0C9	846	1	78.2874	78.287	K	QLLTGSPTSPTVEPEKPTREKKFLDDIKKLQ	NMTVEQLLTGSPTSPTVEPEK(1)PTR(1)
Q9C0D2	917	0.999964	45.6736	85.777	K	SAKADLGRIQESSPTKNNIAVSSDHHVISQL	IQESSPTK(1)NNIAVSSDHHVISQLQDKR
Q9GZP8	27	0.841921	6.21893	50.865	K	TSQKPGVGAGHGGDPKLSPHKVQGRSEAGAG	MEFDLGAALEPTSQK(0.999)PGVGAGH(0.991)GGDPK(0.842)LSPH(0.338)K(0.83)
Q9GZR2	19	0.958682	13.6553	201.76	K	AKVPASKRAPSSPVAKPGPVKTLTRKKNKKK	RAPSSPVAK(0.959)PGPVK(0.041)
Q9GZU2	5	0.84505	7.36742	70.552	K	___________MLPPKHLSATKPKKSWAPNL	LPPK(0.845)H(0.155)LSATK
Q9H000	121	0.954672	13.2353	107.05	K	TLVLRDRNLSGMAERKTQPSMVSNPGSCSDP	K(0.955)TQPSMVSNPGSCSDPQPSPEMK(0.045)PHSYLDAIR
Q9H0D6	493	0.999934	41.805	59.426	K	TSFTSDGSPSPLGGIKRKAEDSDSEPEPEDN	MQNNSSPSISPNTSFTSDGSPSPLGGIK(1)R
Q9H0G5	15	0.889361	9.08912	114.71	K	_MAIPGRQYGLILPKKTQQLHPVLQKPSVFG	K(0.889)TQQLH(0.001)PVLQK(0.11)PSVFGNDSDDDDETSVSESLQR
Q9H0G5	25	0.999538	33.3536	123.3	K	LILPKKTQQLHPVLQKPSVFGNDSDDDDETS	TQQLHPVLQK(1)PSVFGNDSDDDDETSVSESLQR
Q9H0J9	256	1	111.41	120.64	K	SRVPPLFVPQGTSERKDSSGSVSPNTLSQEE	K(1)DSSGSVSPNTLSQEEGDQICLYHIR
Q9H0R5	551	1	80.7463	80.746	K	ERAQLLEEQEKTLTSKLQEQARVLKERCQGE	TLTSK(1)LQEQAR(1)VLK(1)
Q9H0W8	21	1	148.935	201.72	K	HSQPGLYGIERRRRWKEPGSGGPQNLSGPGG	WK(1)EPGSGGPQNLSGPGGR
Q9H1A4	379	1	93.3579	168.02	K	SGVQRFNISSHNQSPKRHSISHSPNSNSNGS	FNISSHNQSPK(1)R
Q9H1A4	310	0.999222	31.172	79.163	K	VATSSSLTAHLRSLSKGDSPVTSPFQNYSSI	SLSK(0.999)GDSPVTSPFQNYSSIH(0.001)SQSR
Q9H1E3	9	1	63.3084	125.95	K	_______MSRPVRNRKVVDYSQFQESDDADE	K(1)VVDYSQFQESDDADEDYGRDSGPPTK
Q9H1R2	18	1	46.0267	46.027	K	EGVLPGLYLGNFIDAKDLDQLGRNKITHIIS	TEGVLPGLYLGNFIDAK(1)DLDQLGR(1)
Q9H2P0	731	0.830769	9.18735	63.576	K	KRTYEQMEFPLLKKRKLDDDSDSPSFFEEKP	K(0.831)LDDDSDSPSFFEEK(0.069)PEEPVVLALDPK(0.1)
Q9H2P0	408	0.999973	45.6172	68.589	K	SLQSANASSLSSGQLKSPSLSQSQASRVLGQ	YSLQSANASSLSSGQLK(1)SPSLSQSQASR
Q9H2U2	320	0.973737	15.6912	85.805	K	EEARSLVESVSSSPNKESNEEEQVWHFLGK_	SLVESVSSSPNK(0.974)ESNEEEQVWHFLGK(0.026)
Q9H2Y7	1380	0.972247	15.445	84.107	K	HVPENSDTEQDVLTVKPVRKVKAGKLIKGGK	AAH(0.028)VPENSDTEQDVLTVK(0.972)PVR
Q9H307	377	0.795267	5.89325	131.31	K	MEVKMEEETEVRESEKQQDSQPEEVMDVLEM	ESEK(0.795)QQDSQPEEVMDVLEMVENVK(0.205)
Q9H334	82	0.911475	10.1268	97.957	K	QLLLQQQQQQQVSGLKSPKRNDKQPALQVPV	QLLLQQQQQQQVSGLK(0.911)SPK(0.089)
Q9H3R5	131	0.996664	29.8854	52.866	K	LEKISRQSSVLMDNMKHLLELNKLIMKSQQE	QSSVLMDNMK(0.997)H(0.994)LLELNK(0.005)LIMK(0.005)
Q9H425	286	0.99987	38.8486	140.19	K	FSSALHEAAPSQLEGKLPSPDVRQDDGEDTL	ERPQPVQAFSSALHEAAPSQLEGK(1)LPSPDVR
Q9H4A3	1998	0.922781	10.7738	158.53	K	DLEQAVLPAVIPKKEKPELSEPSHLNGPSSD	EK(0.923)PELSEPSH(0.077)LNGPSSDPEAAFLSR
Q9H4A3	1996	0.813718	6.39746	112.17	K	FMDLEQAVLPAVIPKKEKPELSEPSHLNGPS	K(0.814)EK(0.187)PELSEPSH(0.999)LNGPSSDPEAAFLSR
Q9H4G0	647	0.999979	46.7219	184.66	K	AFEDFSRSLPELDRDKSDSDTEGLLFSRDLN	SLPELDRDK(1)SDSDTEGLLFSR
Q9H4H8	476	0.999998	56.3822	67.285	K	GSPVSKMSVSRSSSLKSSSSVSSQGSVASST	SSSLK(1)SSSSVSSQGSVASSTGSPASIR
Q9H4L4	231	0.999993	51.6856	54.841	K	PSGPPMEEDGLRWTPKSPLDPDSGLLSCTLP	WTPK(1)SPLDPDSGLLSCTLPNGFGGQSGPEGER
Q9H4L5	109	1	79.1609	82.417	K	KLHGCIDVGLSVMSVKKSSKCIDLDTEEHIY	LHGCIDVGLSVMSVK(1)K(1)
Q9H4X1	94	0.793175	5.83766	65.223	K	SADSLYRNSFSFSDEKLNSPTDSTPALLSAT	NSFSFSDEK(0.793)LNSPTDSTPALLSATVTPQK(0.207)
Q9H582	390	0.996927	25.1108	58.345	K	SPVHTSTFLSNTLKKKCEESDSESPATFSTE	K(0.997)CEESDSESPATFSTEEPSFYPCTK(0.003)
Q9H5J0	532	1	63.8235	133.94	K	RHIRKAHNEDLAKRSKPDPEVGPLLGVQPLP	SK(1)PDPEVGPLLGVQPLPGSPTADR
Q9H694	784	0.999964	45.9513	83.776	K	AETIKELRRANHVSYKPTMTTTYEGSSMSLS	ANHVSYK(1)PTMTTTYEGSSMSLSR
Q9H6F5	64	0.999763	37.2725	128.74	K	PSVQRAGLGSPERPPKTSPGSPRLQQGAGLE	AGLGSPERPPK(1)TSPGSPR
Q9H6Z4	336	1	120.92	124.6	K	FVFGQNMSERVLSPPKLNEVSSDANRENAAA	VLSPPK(1)LNEVSSDANR
Q9H792	895	0.999994	51.9716	170	K	YHAGNLLQRHFTNWTKPTSPTRSTEAESVLH	HFTNWTK(1)PTSPTR
Q9H7C4	129	0.999551	33.477	95.209	K	EPDRIQFVEGPVEPGKPTSPEHVVYEGETVT	IQFVEGPVEPGK(1)PTSPEHVVYEGETVTR
Q9H910	18	0.998523	29.4706	67.827	K	QVPDSEGGRAGSRAMKPPGGESSNLFGSPEE	AMK(0.999)PPGGESSNLFGSPEEATPSSR(0.001)PNR
Q9HAU0	854	1	133.907	140.33	K	VKGSHFPVGVVPPRAKSPTPESSTIASYVTL	AK(1)SPTPESSTIASYVTLR
Q9HB07	123	0.867007	8.14194	74.029	K	HQRSFTETMSSLSPGKPWQTKLSSAGLIYLH	SFTETMSSLSPGK(0.867)PWQTK(0.133)
Q9HBE1	272	0.999915	40.6988	74.793	K	SAPPLTGKRGRGRPRKANLLDSMFGSPGGLR	K(1)ANLLDSMFGSPGGLR
Q9HC10	8	0.965761	14.4945	71.031	K	________MALLIHLKTVSELRGRGDRIAKV	MALLIH(0.036)LK(0.966)TVSELR(0.998)
Q9HCE1	967	0.999913	41.0885	79.286	K	KLDLQQGQNLLQGLSKLSPSTSGPHSHDYLP	LDLQQGQNLLQGLSK(1)LSPSTSGPHSHDYLPQER
Q9NP61	336	0.999983	48.4893	108.3	K	TSDMQTIEQESPIMAKPRKKYNDDSDDSYFT	SVISHSVTSDMQTIEQESPIMAK(1)PR
Q9NP74	366	0.783241	5.57919	102.73	K	WEESNVMQDKDAPSPKPRLSPRETIFGKSEH	LMTPWEESNVMQDK(0.217)DAPSPK(0.783)PR
Q9NP74	252	0.999596	33.9353	91.62	K	VEVEELLRQASERNSKSPTEYHEPVYANPFY	NSK(1)SPTEYHEPVYANPFYR
Q9NPI6	140	0.999928	44.4551	96.312	K	VVEEETRRSQQAARDKQSPSQANGCSDHRPI	DK(1)QSPSQANGCSDHRPIDILEMLSR
Q9NPI6	520	1	78.7615	82.837	K	SVFQQTVTRSSDLERKASSPSPLTIGTPESQ	K(1)ASSPSPLTIGTPESQR
Q9NQW6	563	0.881587	8.71865	55.364	K	REIEMSVDDDDINSSKVINDLFSDVLEEGEL	EIEMSVDDDDINSSK(0.882)VINDLFSDVLEEGELDMEK(0.118)
Q9NR09	576	0.991623	22.1612	55.314	K	NIPFPCLLAGGLLTYKSPATSPISSNSHRSL	HQEQHNIPFPCLLAGGLLTYK(0.992)SPATSPISSNSH(0.006)R(0.002)
Q9NR12	371	0.854099	7.9765	166.47	K	LKMTWHVHCFTCAACKTPIRNRAFYMEEGVP	MTWH(0.01)VH(0.136)CFTCAACK(0.854)TPIR
Q9NR12	278	0.987621	19.3509	82.381	K	QAAAGGVPGGGSNNGKTPVCHQCHKVIRGRY	TSIVQAAAGGVPGGGSNNGK(0.988)TPVCH(0.001)QCHK(0.011)
Q9NR48	921	0.997191	26.472	52.427	K	PVLSVAPFVATESPSKLESESDNHRSSSDFF	MK(0.002)PPVLSVAPFVATESPSK(0.997)LESESDNHR
Q9NRL2	1410	1	79.1969	239.03	K	SKLSLQESESKRRCRKRQSPEPSPVTLGRRS	K(1)RQSPEPSPVTLGR
Q9NRL3	147	0.845284	7.37468	105.06	K	YHKLKFGTDLNQGEKKADVSEQVSNGPVESV	K(0.845)ADVSEQVSNGPVESVTLENSPLVWK(0.155)
Q9NRY4	1148	0.97382	15.705	138.4	K	GSDSEMDTSSLERGRKVSIVSKPVLYRTRCT	K(0.974)VSIVSK(0.026)PVLYR
Q9NRY4	1096	0.999846	38.128	63.848	K	GFDPSDYAEPMDAVVKPRNEEENIYSVPHDS	SVSSSPWLPQDGFDPSDYAEPMDAVVK(1)PR
Q9NS87	1143	0.930386	10.2159	107.32	K	LEHVMDSAAEDPQSPKTPPHFQTHLAKLLET	QLEHVMDSAAEDPQSPK(0.93)TPPH(0.343)FQTH(0.03)LAK(0.696)
Q9NTI5	1136	0.894978	9.3053	107.13	K	TPGKPKTTNVLGAVNKPLSSAGKQSQTKSSR	TTNVLGAVNK(0.895)PLSSAGK(0.105)
Q9NV56	200	1	80.6053	126.48	K	KVLTANSNPSSPSAAKRRRT___________	VLTANSNPSSPSAAK(1)R
Q9NWH9	552	0.98526	18.252	112.44	K	SESIKKSEEKKRISSKSPGHMVILDQTKGDH	ISSK(0.985)SPGHMVILDQTK(0.015)
Q9NXD2	613	0.760527	5.01862	88.329	K	DQELLPRRNSLILKPKPDPAQQTDSQNSDTE	NSLILK(0.239)PK(0.761)PDPAQQTDSQNSDTEQYFR
Q9NYJ8	522	0.999767	36.3394	77.357	K	TDPTLAHVDRISETRKLSMGSDDAAYTQALL	K(1)LSMGSDDAAYTQALLVHQK
Q9NYL2	731	0.999973	45.705	212.03	K	RVSQSALNPHQSPDFKRSPRDLHQPNTIPGM	VSQSALNPHQSPDFK(1)R
Q9NYQ6	2879	0.999779	36.9275	89.072	K	PDQSLAESDSEDPSGKPRLKVETKVSVELHR	GDAVANHVPAGWPDQSLAESDSEDPSGK(1)PR
Q9NZJ0	432	0.995194	23.2663	90.912	K	RPGLVTVTSSQSTPAKAPRAKCNPSNSSPSS	ESR(0.005)PGLVTVTSSQSTPAK(0.995)APR
Q9NZJ4	887	0.999998	57.723	75.968	K	LPSAVLQIMEKMPLQKLCNQITSLLPTHKDA	MPLQK(1)LCNQITSLLPTHK
Q9P0U3	153	1	122.459	206.63	K	NHHCHVSAYEKSFPIKPVPSPSWSGSCRRSL	SFPIK(1)PVPSPSWSGSCR
Q9P0U4	141	0.999684	39.4515	74.408	K	TGVGAMLARGSASPHKSSPQPLVATPSQHHQ	GSASPH(1)K(1)SSPQPLVATPSQHHQQQQQQIK
Q9P0V3	644	0.982733	17.5711	88.036	K	NEVGKIILSPFATTTKYPTFQDRPVSSLKFG	IILSPFATTTK(0.983)YPTFQDRPVSSLK(0.017)
Q9P0V3	137	0.972431	15.4744	57.02	K	SGMIDNLPDSPDEVAKELELLGGWTDDKKVP	NSTLSDSGMIDNLPDSPDEVAK(0.972)ELELLGGWTDDK(0.028)
Q9P0V3	270	1	96.6127	130.14	K	AKSDAPTSSSFFTGLKSPAPEQFQSREDFRT	SDAPTSSSFFTGLK(1)SPAPEQFQSR
Q9P206	553	0.918748	10.5337	92.8	K	GLAGPPASPGKAQPPKPERVTSLRSPGASVS	GLAGPPASPGK(0.081)AQPPK(0.919)PER
Q9P206	969	1	91.5202	116.86	K	QAPKKSPKAPPPVARKPSVGVPPPASPSYPR	K(1)PSVGVPPPASPSYPR
Q9P219	1589	1	79.1334	126.86	K	ESSRNTSSNSSPLNLKGSSEQLHGRSESFSS	NTSSNSSPLNLK(1)GSSEQLHGR
Q9P225	3363	0.774148	5.34999	49.662	K	CSPSFAIDNFLCNPTKVRDWNIQGLPSDAFS	IWELQVPCSPSFAIDNFLCNPTK(0.774)VR(0.226)
Q9P260	450	0.999782	36.6703	99.943	K	DIHLSISDEADSTIPKENSPNSFPRREREGM	NTDIHLSISDEADSTIPK(1)ENSPNSFPR
Q9P281	649	0.880498	8.67352	57.173	K	KNLLKYSSQALVVGQKAPLVGLGGLKASCIQ	YSSQALVVGQK(0.88)APLVGLGGLK(0.12)
Q9P2B4	520	1	126.664	199.33	K	VTQVLSRFTSQQGPIKPVSPNSSPFGTDYRN	FTSQQGPIK(1)PVSPNSSPFGTDYR
Q9P2B4	465	0.999656	35.366	103.03	K	SYQVGINQRFHAARHKFQSQADQDQQASGLQ	HK(1)FQSQADQDQQASGLQSPPSR
Q9P2B4	567	1	98.2308	208.38	K	PGKVSSPLSPLSPGIKSPTIPRAERGNPPPI	VSSPLSPLSPGIK(1)SPTIPR
Q9P2D0	1062	1	94.2056	122.64	K	DFTTGFHSDKIEAKVKPYVNGTSPVYSREDL	VK(1)PYVNGTSPVYSR
Q9P2D1	1879	0.938471	14.3732	81.682	K	FKDEIDEFANSPSEDKEESMEIHATGKHSES	TPFK(0.034)DEIDEFANSPSEDK(0.938)EESMEIHATGK(0.027)
Q9P2Y5	501	0.999967	46.5701	63.803	K	GGADVGFSGGIPSPDKGHRKRASSENERLQY	QSSIFGGADVGFSGGIPSPDK(1)GHR
Q9UBB9	220	0.999999	61.5852	71.44	K	FPVVDSEEEAEEEFQKELSQWRKDPSGSKKK	TTQSMQDFPVVDSEEEAEEEFQK(1)ELSQWR
Q9UBC1	161	0.960267	13.833	79.181	K	PPWDSAEEEEEDDASKEREWRQKLQGELEDE	NK(0.04)DGETPGQILGWGPPWDSAEEEEEDDASK(0.96)ER
Q9UBC2	233	0.999987	48.9875	77.19	K	VFPGAVPVLPASPPPKDSLRSTPSHGSVSSL	TVFPGAVPVLPASPPPK(1)DSLR
Q9UBF8	276	0.999998	57.9118	222.2	K	PDTGLSPSKRTHQRSKSDATASISLSSNLKR	SK(1)SDATASISLSSNLKR
Q9UDY2	121	1	218.962	287.43	K	RKSGKVAAIVVKRPRKVQVAALQASPPLDQD	K(1)VQVAALQASPPLDQDDR
Q9UER7	662	0.999996	53.7777	59.228	K	SYVERQRSVHEKNGKKICTLPSPPSPLASLA	K(1)ICTLPSPPSPLASLAPVADSSTR
Q9UEY8	680	0.954363	13.2437	116.27	K	PEKIEEVLSPEGSPSKSPSKKKKKFRTPSFL	SPEKIEEVLSPEGSPSK(0.954)SPSK(0.045)
Q9UF47	45	0.999619	35.9898	143.28	K	ASNEEIKKTYRKLALKHHPDKNPDDPAATEK	KLALK(1)HHPDK
Q9UFC0	246	0.999976	46.289	223.06	K	ALKRPDDVPLSLSPSKRACASPSAQVEGSPV	RPDDVPLSLSPSK(1)R
Q9UGP4	328	0.938762	11.8553	62.377	K	RSNSGLGGEVSGVMSKPNVDPQPWFQDGPKS	SNSGLGGEVSGVMSK(0.939)PNVDPQPWFQDGPK(0.061)
Q9UGU5	515	0.999622	38.6445	51.469	K	KKSPPTTMLLPASPAKAPETEPIDVAAHLQL	SPPTTMLLPASPAK(1)APETEPIDVAAH(0.999)LQLLGESLSLIGH(0.001)R
Q9UH99	122	1	74.4445	87.891	K	TGGSESSRASGLVGRKATEDFLGSSSGYSSE	K(1)ATEDFLGSSSGYSSEDDYVGYSDVDQQSSSSR
Q9UH99	36	1	77.2817	95.404	K	SSGGSSVAGSQSTLFKDSPLRTLKRKSSNMK	YSQGDDDGSSSSGGSSVAGSQSTLFK(1)DSPLR
Q9UHB6	223	1	77.9589	127.42	K	QTKILRAQSRSASGRKISENSYSLDDLEIGP	K(1)ISENSYSLDDLEIGPGQLSSSTFDSEKNESR
Q9UHB6	359	1	78.6274	215.79	K	RDSQVKSEVQQPVHPKPLSPDSRASSLSESS	SEVQQPVHPK(1)PLSPDSR
Q9UHB7	183	1	148.737	165.16	K	QHGSEHSKSRSSSPGKPQAVSSLNSSHSRSH	SSSPGK(1)PQAVSSLNSSHSR
Q9UHB7	485	0.896425	12.1741	105.46	K	NKWQLDNWLNKVNPHKVSPASSVDSNIPSSQ	VNPH(0.054)K(0.896)VSPASSVDSNIPSSQGYK(0.049)
Q9UHB7	677	0.993727	21.998	112.61	K	SSQTPKYPESNRTPVKPSSVEEEDSFFRQRM	YPESNR(0.006)TPVK(0.994)PSSVEEEDSFFR
Q9UHF7	93	0.999998	57.0685	81.48	K	AVLSEKAGFNYESPSKGGNFPSFPHDEVTDR	AGFNYESPSK(1)GGNFPSFPHDEVTDR
Q9UHF7	1040	0.999438	35.0296	93.949	K	TLDIHKRMQPLHIQIKSPQESTGDPGNSSSV	MQPLHIQIK(0.999)SPQESTGDPGNSSSVSEGK
Q9UHF7	126	0.999999	59.5643	93.397	K	LAFSSPAAGGVCEPLKSPQRAEADDPQDMAC	NMLAFSSPAAGGVCEPLK(1)SPQR
Q9UHI6	710	0.813534	6.39777	66.429	K	SLEQPPNGSDTPNPEKYQESPGIQMKTRLKE	ISLEQPPNGSDTPNPEK(0.814)YQESPGIQMK(0.186)
Q9UHI8	771	1	40.544	40.544	K	RNQRGSRNNGSFLAIKAADGTYILNGDYTLS	NNGSFLAIK(1)AADGTYILNGDYTLSTLEQDIMYK(1)
Q9UIF8	680	1	80.4557	102.47	K	GEKTSMKLNKTTSSVKSPSMSLTGHSTPRNL	TTSSVK(1)SPSMSLTGHSTPR
Q9UJM3	259	0.99995	43.0378	126.91	K	RRLRRSHSGPAGSFNKPAIRISNCCIHRASP	SHSGPAGSFNK(1)PAIR
Q9UJX5	772	0.958954	13.6852	68.074	K	SSDEEEEASNKPVKIKEEVLSESEAENQQAG	IK(0.959)EEVLSESEAENQQAGAAALAPEIVIK(0.041)
Q9UJX6	228	1	74.2049	76.417	K	YRLLQSPLCAGCSSDKQQCWCRQALEQFHQL	LLQSPLCAGCSSDK(1)QQCWCR
Q9UK61	1543	0.994889	22.8923	104.07	K	IWEKETKGSRGTDQKKNTQIELQSSPDVQNS	K(0.995)NTQIELQSSPDVQNSLLEDK(0.005)TYLDSEER
Q9UK61	1563	1	72.545	86.079	K	ELQSSPDVQNSLLEDKTYLDSEERTSIDIVC	NTQIELQSSPDVQNSLLEDK(1)TYLDSEER
Q9UKA4	106	0.999955	43.5526	80.683	K	CSLNENEIICMKNINKPLDISSDPLNQSHPS	NINK(1)PLDISSDPLNQSHPSGMLCVMR
Q9UKA4	1578	1	95.8677	234.63	K	VSETTKSADRVTYAEKLSPLTGQACRYCDLK	VTYAEK(1)LSPLTGQACR
Q9UKS6	315	0.999993	51.6366	165.16	K	EEWSLDTQRTISRKEKGGRSPDEVTLTSIVP	EK(1)GGRSPDEVTLTSIVPTR
Q9UKV3	494	0.999933	41.7581	127.32	K	PLSSPSDTKAESPAEKVPEESVLPLVQKSTL	AESPAEK(1)VPEESVLPLVQK
Q9UKV3	672	0.999709	35.3537	84.509	K	SPGVSRDSSTSYTETKDPSSGQEVATPPVPQ	DSSTSYTETK(1)DPSSGQEVATPPVPQLQVCEPK
Q9UKX7	276	0.954979	13.2657	81.943	K	PSSLGATSASFNFGKKVDSSVLGSLSSVPLT	K(0.955)VDSSVLGSLSSVPLTGFSFSPGNSSLFGK(0.045)
Q9ULH7	844	0.999018	30.0921	92.405	K	NAPLPSLQNGPNTPNKPSSPPPPQQFVVQHS	NAPLPSLQNGPNTPNK(0.999)PSSPPPPQQFVVQHSLFGSPVAK(0.001)
Q9ULH7	65	0.974697	17.5685	72.082	K	RTREQLVDQGIMPPLKSPAAFHEQIKSLERA	TREQLVDQGIMPPLK(0.975)SPAAFH(0.008)EQIK(0.017)
Q9ULL5	1702	0.798389	6.30747	84.214	K	GGSSAPPPKAPAPPPKPETPEKTTSEKPPEQ	NPVSAGGSSAPPPK(0.015)APAPPPK(0.798)PETPEK(0.187)
Q9ULM3	577	0.998597	28.5237	128.57	K	PPLCPIGSHPKVQSPKPITGGLGAFTKVIIK	VQSPK(0.999)PITGGLGAFTK(0.001)
Q9ULX3	198	0.999392	32.1565	120.99	K	PSEEEEEEENGFEDRKDDSDDDGGGWITPSN	K(0.999)DDSDDDGGGWITPSNIK(0.001)
Q9UM00	237	1	104.939	104.94	K	TKQAGGFLGPPPPSGKFS_____________	QAGGFLGPPPPSGK(1)FS
Q9UMD9	369	0.999925	41.9861	65.855	K	AKKEMELLIMTKDSGKVFTASPASIAATSFS	DSGK(1)VFTASPASIAATSFSEDTLKK
Q9UMS0	110	0.99865	29.9905	62.028	K	FRSPLARQLFRIEGVKSVFFGPDFITVTKEN	IEGVK(0.999)SVFFGPDFITVTK(0.001)ENEELDWNLLK
Q9UMX1	344	0.999999	61.8798	73.11	K	PQRQNGLAHDRAPSRKDSLESDSSTAIIPHE	K(1)DSLESDSSTAIIPHELIR
Q9UNK0	52	1	89.6631	116.71	K	APKLTVTIRALLQNLKEKIALLKDLLLRAVS	LTVTIR(1)ALLQNLK(1)EK(1)
Q9UNS1	1085	1	108.581	150.46	K	RPPASGQETFWRIPAKLSPTQLRRAAASLSQ	IPAK(1)LSPTQLR
Q9UNZ2	112	0.841947	7.28705	154.13	K	GGSERSGQQIVGPPRKKSPNELVDDLFKGAK	K(0.842)K(0.157)SPNELVDDLFK(0.001)
Q9UPN9	861	1	161.101	281.65	K	NESCKQSGLSSLVNGKSPIRSLMHRSARIGG	QSGLSSLVNGK(1)SPIR
Q9UPQ0	296	0.999987	49.8353	134.02	K	PAPLRKKKAEREEYRKSWSTATSPLGGERPF	K(1)SWSTATSPLGGERPFR
Q9UPQ0	717	0.96082	14.2092	131.48	K	SGKVELVLSQKVVKPKSPEPEATLTFPFLDK	VVK(0.036)PK(0.961)SPEPEATLTFPFLDK(0.003)
Q9UPT5	256	1	71.7164	97.417	K	SSSSSGVPYSPAIPNKRKDTPTKKPVKRPGT	SSSSSGVPYSPAIPNK(1)R
Q9UPT8	900	0.885863	10.9784	91.712	K	SGPSDPRLARALPTSKPEGSLHSSPVGPSSS	ALPTSK(0.886)PEGSLH(0.043)SSPVGPSSSK(0.071)
Q9UPU5	1140	0.938094	11.8051	126.34	K	GRKKTLLSESSSQSSKSPSLSSKQQHQPSAS	TLLSESSSQSSK(0.938)SPSLSSK(0.062)
Q9UQ35	1186	0.99709	25.3489	159.44	K	PPQEDATASPPRQKDKFSPFPVQDRPESSLV	DK(0.997)FSPFPVQDRPESSLVFK(0.003)
Q9UQ35	1244	0.969375	15.0203	64.405	K	LPTSSQDEELMEVVEKSEEPAGQILSHLSSE	EQNSALPTSSQDEELMEVVEK(0.969)SEEPAGQILSHLSSELK(0.031)
Q9UQ35	1022	0.994635	22.6813	99.011	K	PSLSGSKSPCPQEKSKDSLVQSCPGSLSLCA	SK(0.995)DSLVQSCPGSLSLCAGVK(0.005)
Q9UQ35	1000	0.999998	57.362	107.75	K	PRQSHSGSISPYPKVKAQTPPGPSLSGSKSP	VK(1)AQTPPGPSLSGSK(0.048)SPCPQEK(0.952)
Q9UQ35	980	0.988094	19.0345	113.37	K	PRYSHSGSSSPDTKVKPETPPRQSHSGSISP	VK(0.988)PETPPR(0.054)QSH(0.955)SGSISPYPK(0.002)
Q9UQE7	1059	0.999945	42.6013	64.112	K	FQKLVPGGKATLVMKKGDVEGSQSQDEGEGS	K(1)GDVEGSQSQDEGEGSGESER(1)GSGSQSSVPSVDQFTGVGIR
Q9UQK1	262	0.999733	34.9049	41.763	K	DNNDGQNYRIVHVQWKPDGVQTQMAPQDCAF	IVH(1)VQWK(1)PDGVQTQMAPQDCAFH(0.825)QTSPK(0.175)
Q9Y294	159	0.999931	41.8182	88.027	K	PRVTRFHINWEDNTEKLEDAESSNPNLQSLL	FHINWEDNTEK(1)LEDAESSNPNLQSLLSTDALPSASK
Q9Y2D5	619	0.95266	13.0997	95.404	K	EATVEEAEAAAFGSEKPQSMFEPPQVSSPVQ	DGAEQQGPEATVEEAEAAAFGSEK(0.953)PQSMFEPPQVSSPVQEK(0.047)R(0.001)
Q9Y2D5	774	0.999883	39.307	76.967	K	SRTCYKTAPGKIEKVKPPPSPTTEGPSLQPD	VK(1)PPPSPTTEGPSLQPDLAPEEAAGTQRPK
Q9Y2H2	939	0.999345	31.8979	79.383	K	AHGSGLGKGQESPLKKSPSAGDVHILTGFAK	K(0.999)SPSAGDVHILTGFAK(0.001)
Q9Y2K7	539	0.999996	54.5001	73.632	K	FPTRPKVRVPTIPITKPHTMKPAPRLTPVRP	VRVPTIPITK(1)PH(1)TMK(1)
Q9Y2W1	221	0.999984	47.8694	92.295	K	FSGGTSQDTKASESSKPWPDATYGTGSASRA	ASESSK(1)PWPDATYGTGSASR
Q9Y2W1	252	1	160.669	215.93	K	SAVSELSPRERSPALKSPLQSVVVRRRSPRP	ER(1)SPALK(1)SPLQSVVVR
Q9Y2W1	319	0.999961	44.7436	177.67	K	HGSGSLSPSKKSPVGKSPPSTGSTYGSSQKE	SPVGK(1)SPPSTGSTYGSSQKEESAASGGAAYTK
Q9Y2W1	470	0.993875	22.1769	131.32	K	KVIGANKNQEEEKSGKWEGLVYAPPGKEKQR	NQEEEK(0.006)SGK(0.994)WEGLVYAPPGK
Q9Y2X9	259	0.996661	24.7952	89.297	K	SLVGDGEGAILSPSQKPHICDHCSAAFRSSY	PSLVGDGEGAILSPSQK(0.997)PH(0.003)ICDHCSAAFR
Q9Y3A4	93	0.933843	11.4973	63.158	K	LLSTCGLVQSVELQEKPDLAESPKESRSKFF	LLSTCGLVQSVELQEK(0.934)PDLAESPK(0.066)ESR
Q9Y3S2	289	1	112.878	128.82	K	EYEAEDDEEEEDEGRKDSDTESSDLFTNLNL	K(1)DSDTESSDLFTNLNLGR
Q9Y450	62	0.972406	15.4999	93.125	K	KPSVEPVEEYDYEDLKESSNSVSNHQLSGFD	DK(0.027)PSVEPVEEYDYEDLK(0.972)ESSNSVSNHQLSGFDQAR
Q9Y478	195	0.966227	14.5652	86.261	K	SSSPPGPYHQEPYVCKPEERFRAPPILPPHL	CSDVSELSSSPPGPYH(0.034)QEPYVCK(0.966)PEER
Q9Y490	592	1	70.4379	70.438	K	VTTISSNLTEMSRGVKLLAALLEDEGGSGRP	GVK(1)LLAALLEDEGGSGR(1)PLLQAAK(1)
Q9Y4B5	1218	0.999427	35.896	69.485	K	AESKGALKKEREVHQKLLADSHSLVMDLRWQ	ER(0.01)EVH(0.99)QK(0.999)LLADSH(0.823)SLVMDLR(0.178)
Q9Y4E8	228	1	91.6222	91.622	K	QKNEDGTWPRGPSTPKSPGASNFSTLPKISP	GPSTPK(1)SPGASNFSTLPK(1)
Q9Y4F3	1092	1	135.815	155.47	K	NKPPPPNTDPWLLRSKSPVGNPQLIQFSREV	SK(1)SPVGNPQLIQFSR
Q9Y4F5	871	0.989238	20.0242	76.001	K	PDGPAPAFLRQESFTKEPASGPPAPGKPPHI	QESFTK(0.989)EPASGPPAPGK(0.01)PPH(0.001)ISSHPLLQDLAATR
Q9Y4H2	305	0.999998	56.8068	109.81	K	AMKALKELFEFRPRSKSQSSGSSATHPISVP	SK(1)SQSSGSSATHPISVPGAR
Q9Y4K4	232	0.999969	45.1406	69.846	K	PMFDLHPMRALFLMSKSNFQPPKLKDKTKWS	ALFLMSK(1)SNFQPPK
Q9Y520	2670	1	157.371	189.09	K	MSEMELKAFGSGIDIKPGTPPIAGRSTTPTS	AFGSGIDIK(1)PGTPPIAGR
Q9Y520	2008	0.995464	23.6838	77.077	K	DNKVAPPAVLNDISKKLGPISPPQPPSVSAW	K(0.995)LGPISPPQPPSVSAWNK(0.004)PLTSFGSAPSSEGAK
Q9Y570	64	0.999999	58.5746	60.48	K	YFESMEDVEVENETGKDTFRVYKSGSEGPVL	DFSPVPWSQYFESMEDVEVENETGK(1)DTFR
Q9Y592	225	1	96.1713	96.171	K	VEQLAREKVYLCQKLKGLEAEVAELKAEKEN	LK(1)GLEAEVAELK(1)AEK(1)
Q9Y592	235	1	96.1713	96.171	K	LCQKLKGLEAEVAELKAEKENSEAQVENAQR	LK(1)GLEAEVAELK(1)AEK(1)
Q9Y5H4	113	0.761866	5.05056	56.139	K	QSMPCLVSFNILVEDKMKLFPVEVEIIDIND	EELCAQSMPCLVSFNILVEDK(0.762)MK(0.238)
Q9Y5K6	544	0.996679	24.7735	87.363	K	NLKPSELKKDTCYSPKPSVYLSTPSSASKAN	DTCYSPK(0.997)PSVYLSTPSSASK(0.003)
Q9Y618	2412	0.999949	43.0243	76.909	K	GGKAKVSGRPSSRKAKSPAPGLASGDRPPSV	AK(1)SPAPGLASGDRPPSVSSVHSEGDCNR
Q9Y618	1594	0.817268	6.5414	94.359	K	ASQDRKLTSTPREIAKSPHSTVPEHHPHPIS	EIAK(0.817)SPH(0.181)STVPEH(0.001)H(0.001)PHPISPYEHLLR
Q9Y618	1535	0.792085	5.8139	83.755	K	GSIARGAPVIVPELGKPRQSPLTYEDHGAPF	GAPVIVPELGK(0.792)PR(0.208)QSPLTYEDHGAPFAGHLPR
Q9Y618	1787	0.999889	39.554	208.92	K	HSSSPLSPGGPTHLTKPTTTSSSERERDRDR	HSSSPLSPGGPTHLTK(1)PTTTSSSER
Q9Y618	2257	0.963211	14.18	135.08	K	LYRDGEQTEPSRMGSKSPGNTSQPPAFFSKL	MGSK(0.963)SPGNTSQPPAFFSK(0.037)
Q9Y618	1974	0.999503	33.0392	88.708	K	KPPARSGLEPASSPSKGSEPRPLVPPVSGHA	SGLEPASSPSK(1)GSEPRPLVPPVSGHATIAR
Q9Y6D5	215	0.919155	10.5574	129.74	K	QVLQEARELEKPIQSKPQSPVIQAAAVSPKF	ELEK(0.081)PIQSK(0.919)PQSPVIQAAAVSPK(1)
Q9Y6E2	400	1	82.8772	82.877	K	AHVAKGKSVFLDQMKKFVEWLQNAEEESESE	K(1)FVEWLQNAEEESESEGEEN
Q9Y6J9	484	1	119.287	165.7	K	PGDKKEPAAAPDSVRKMPQLTASAIVSPHGD	K(1)MPQLTASAIVSPHGDESPR
Q9Y6N7	937	1	134.669	141.73	K	RKKRNGLTSTYAGIRKVPSFTFTPTVTYQRG	K(1)VPSFTFTPTVTYQR
Q9Y6R9	444	0.836412	7.08668	123.67	K	DFSESLSRGGHRRRGKPPSPTPWSGSNMKSP	GK(0.836)PPSPTPWSGSNMK(0.164)
Q9Y6X9	722	0.999921	41.0213	147.62	K	REVPSPKVIKTPVVKKTESPIKLSPATPSRK	K(1)TESPIKLSPATPSR
Q9Y6Y0	349	1	63.9445	82.265	K	SKSLSFEMQQDELIEKPMSPMQYARSGLGTA	SLSFEMQQDELIEK(1)PMSPMQYAR
A0A0J9YWL9	596	0.991995	23.6997	71.976	H	LEDSNSHSLKKDPMMHQEMVPLGDSNSHSLK	K(0.006)DPMMH(0.992)QEMVPLGDSNSH(0.983)SLK(0.966)K(0.053)
A0A0J9YWL9	608	0.983398	17.7005	71.976	H	PMMHQEMVPLGDSNSHSLKKDPVVPQDTAPL	K(0.006)DPMMH(0.992)QEMVPLGDSNSH(0.983)SLK(0.966)K(0.053)
A0A1B0GUJ8	37	1	53.0333	53.033	H	SYKSLMILGIPEDCNHEEFEEIIRLPLKPLG	SLMILGIPEDCNH(1)EEFEEIIR(1)LPLK(1)
A0FGR8	689	0.997531	28.7432	84.515	H	RPSVSKEGRKTSIKSHMSGSPGPGGSNTAPS	SH(0.998)MSGSPGPGGSNTAPSTPVIGGSDK(0.001)PGMEEK(0.001)
A0JLT2	225	0.900319	12.2101	75.057	H	DRKRKKKEKKKKKNRHSPDHPGMGSSQASSS	NR(0.054)H(0.9)SPDH(0.046)PGMGSSQASSSSSLR
A0JLT2	229	0.999806	37.2459	166.21	H	KKKEKKKKKNRHSPDHPGMGSSQASSSSSLR	NRHSPDH(1)PGMGSSQASSSSSLR
A1L390	999	0.996955	27.3153	113.75	H	PVLSLFDYEQLMAQEHSPPKPSSAGEMSPQR	K(0.001)PVLSLFDYEQLMAQEH(0.997)SPPK(0.002)PSSAGEMSPQR
A1X283	294	0.782132	5.55243	76.818	H	SGEPLPPKPGPGSPSHPGALDLDGVSRQQNA	NSGEPLPPK(0.218)PGPGSPSH(0.782)PGALDLDGVSR
A2RUC4	22	0.805829	6.23705	47.728	H	PVPRLEGVSREQFMQHLYPQRKPLVLEGIDL	MAGQH(0.229)LPVPR(0.776)LEGVSR(0.995)EQFMQH(0.806)LYPQR(0.194)
A4D1E1	1168	1	62.8609	62.861	H	DEIDKYKILQLQAQQHMQKQLLSKHLRVLPA	ILQLQAQQH(1)MQK(1)QLLSK(1)
A4D1F6	808	0.980301	17.0975	101.3	H	TDMPTKSTVSLSERAHQALVIWKTQSNKLSL	STVSLSER(0.019)AH(0.98)QALVIWK(0.001)
A4FU69	398	0.997268	25.8976	76.357	H	DMRRQMFAELFLHCDHGKVGFLDRQRTLALL	R(1)QMFAELFLH(0.001)CDH(0.997)GK(0.998)VGFLDR(0.004)
A5PLN9	10	0.922129	10.7372	76.927	H	______MEVNPPKQEHLLALKVMRLTKPTLF	MEVNPPKQEH(0.922)LLALK(0.078)
A5YKK6	1270	0.991971	22.0248	41.661	H	PNPWTMAIMNVLAELHQEHDLKLNLKFEIEV	VLESSIR(0.003)SVVFR(0.009)PPNPWTMAIMNVLAELH(0.992)QEH(0.998)DLK(0.999)
A5YKK6	1273	0.997732	28.1204	41.661	H	WTMAIMNVLAELHQEHDLKLNLKFEIEVLCK	VLESSIR(0.003)SVVFR(0.009)PPNPWTMAIMNVLAELH(0.992)QEH(0.998)DLK(0.999)
P0C7N4	40	0.999829	38.2736	52.91	H	IVTPASRRLGPRGGRHLGSVSTAMAATQELL	GGR(1)H(1)LGSVSTAMAATQELLLQLQKDNR
A6NKT7	1269	0.95889	13.6832	64.749	H	LREDALDDSVSSSSVHASPLASSPVRKNLFH	EDALDDSVSSSSVH(0.959)ASPLASSPVRK(0.041)
A6NMS3	155	0.999946	42.9559	64.522	H	LCIRMTTGAFKAGNLHSMIHVGLLLRLTFCR	AGNLH(1)SMIH(1)VGLLLRLTFCRSNK
A6NMS3	159	0.999641	34.5087	64.522	H	MTTGAFKAGNLHSMIHVGLLLRLTFCRSNKI	AGNLH(1)SMIH(1)VGLLLRLTFCRSNK
A7E2V4	1747	0.827315	7.09034	42.106	H	LQEIVMETLQRLSPAHAHNHLRAPAFHQLVQ	GVLSPFVLQEIVMETLQR(0.042)LSPAH(0.827)AH(0.492)NH(0.492)LR(0.146)
A7E2V4	1091	0.929748	11.2171	73.322	H	PTEGFTEKNVPESSPHSPCEGLPSEAALTPR	NVPESSPH(0.93)SPCEGLPSEAALTPRPEGK(0.07)
A7XYQ1	665	0.982793	18.5231	60.49	H	QDGVIDLTVGHRARLHNVIHRALHAHVKAER	LH(0.983)NVIH(0.983)R(0.987)ALH(0.695)AH(0.163)VK(0.185)AER(0.005)
A7XYQ1	669	0.982755	18.5231	60.49	H	IDLTVGHRARLHNVIHRALHAHVKAEREPSA	LH(0.983)NVIH(0.983)R(0.987)ALH(0.695)AH(0.163)VK(0.185)AER(0.005)
Q0WX57	467	1	72.6522	72.652	H	VRKVEGTLPPDVLVIHQSKYKCGMKNHHPEQ	VEGTLPPDVLVIH(1)QSK(1)
A8MY62	307	0.988233	18.3769	53.262	H	PGAYFANETGTPWEFHAQRGYRVVRKDGDLD	TLLAPLLACPGAYFANETGTPWEFH(0.988)AQR(0.821)GYR(0.19)
M0R2J8	432	0.995268	23.2195	66.201	H	EKITEKVILSMTAKEHHKEQEEVSRLIDELQ	EH(0.995)H(0.995)K(0.999)EQEEVSR(0.011)LIDELQTAIK
M0R2J8	433	0.995268	23.2195	66.201	H	KITEKVILSMTAKEHHKEQEEVSRLIDELQT	EH(0.995)H(0.995)K(0.999)EQEEVSR(0.011)LIDELQTAIK
O00139	611	0.999946	44.3309	60.876	H	CEQNEEEVSPQLFTFHEAVSQMVEMEEQVVE	LLCEQNEEEVSPQLFTFH(1)EAVSQMVEMEEQVVEDHR
O00180	296	0.968107	18.4375	54.681	H	YVKKDKDEDQVHIIEHDQLSFSSITDQAAGM	DK(0.039)DEDQVH(0.06)IIEH(0.968)DQLSFSSITDQAAGMK(0.245)EDQK(0.688)
O00192	7	0.99183	19.8698	43.116	H	_________MEDCNVHSAASILASVKEQEAR	MEDCNVH(0.992)SAASILASVK(0.801)EQEAR(0.207)
O00592	508	0.879958	8.81197	57.902	H	QQRLTEELQTVENGYHDNPTLEVMETSSEMQ	LTEELQTVENGYH(0.88)DNPTLEVMETSSEMQEK(0.12)
O00712	14	0.997775	27.5893	40.937	H	__MMYSPICLTQDEFHPFIEALLPHVRAIAY	MMYSPICLTQDEFH(0.998)PFIEALLPH(0.002)VR
O14497	359	0.983251	17.6867	126.83	H	AAAAAASGGAQQRSHHAPMSPGSSGGGGQPL	SH(0.017)H(0.983)APMSPGSSGGGGQPLAR
O14578	700	0.999097	32.9499	53.6	H	GIRKKLVEAEELEEKHREAQVSAQHLEVHLK	H(0.999)R(0.999)EAQVSAQH(0.008)LEVH(0.956)LK(0.829)QK(0.209)
O14578	713	0.956063	13.1248	53.6	H	EKHREAQVSAQHLEVHLKQKEQHYEEKIKVL	H(0.999)R(0.999)EAQVSAQH(0.008)LEVH(0.956)LK(0.829)QK(0.209)
O14662	31	0.999926	41.9667	69.805	H	NSIQNRQLLAEQVSSHITSSPLHSRSIAAEL	QLLAEQVSSH(1)ITSSPLHSR
O14662	196	0.999938	43.1155	67.76	H	SGYLKRMKNREERSQHFFDTSVPLMDDGDDN	SQH(1)FFDTSVPLMDDGDDNTLYHR
O15027	311	1	69.6084	134.77	H	SDPESTFRQNPRIVNHWASPELRQNPGVKNE	IVNH(1)WASPELR
O15027	1373	0.999875	39.0354	89.231	H	HSAHSLASRRSSLSSHSHQSQIYRSHNVAAG	SSLSSH(1)SHQSQIYR
O15027	1400	0.999736	36.2422	100.79	H	VAAGSYEAPLPPGSFHGDFAYGTYRSNFSSG	SHNVAAGSYEAPLPPGSFH(1)GDFAYGTYR
O15037	348	0.999989	53.2126	68.895	H	HRAAQSRGASLLQRLHNGNASPPRVPSPPPA	LH(1)NGNASPPR(1)VPSPPPAPEPPWHCGDR
O15042	69	0.999673	34.8482	160.93	H	NYRNESARESLCDSPHQNLSRPLLENKLKAF	ESLCDSPH(1)QNLSRPLLENK
O15047	536	0.999613	31.2803	68.453	H	LGARDTGSEVPSGSGHGPCTPPPAPANFEDV	DTGSEVPSGSGH(1)GPCTPPPAPANFEDVAPTGSGEPGATR(0.48)ESPK(0.52)
O15075	35	0.999911	40.5438	77.726	H	RYSRGSRVNGLPSPTHSAHCSFYRTRTLQTL	VNGLPSPTH(1)SAHCSFYR
O15156	470	0.846764	6.7261	46.785	H	LEVRTRRRRKDDAPPHYPPPSTAAASPAGLD	R(0.007)K(0.295)DDAPPH(0.847)YPPPSTAAASPAGLDLSNGH(0.841)LDTFR(0.01)
O15156	490	0.841267	6.80503	46.902	H	STAAASPAGLDLSNGHLDTFRLSLARFWEQS	R(0.007)K(0.295)DDAPPH(0.847)YPPPSTAAASPAGLDLSNGH(0.841)LDTFR(0.01)
O15357	994	0.962092	14.0448	65.811	H	NSFNNPAYYVLEGVPHQLLPPEPPSPARAPV	NSFNNPAYYVLEGVPH(0.962)QLLPPEPPSPAR(0.038)
O15409	340	0.875363	10.1161	57.496	H	SARRDSSSHEETGASHTLYGHGVCKWPGCES	R(0.015)DSSSH(0.024)EETGASH(0.875)TLYGHGVCK(0.085)
O15417	1030	0.998434	28.0398	46.31	H	VSKPPAYAYPATPSSHPTSPPPASPPPTPGI	LEDVSK(0.999)PPAYAYPATPSSH(0.998)PTSPPPASPPPTPGITR(0.003)
O43159	55	0.998456	28.1063	62.082	H	LLATLRALEAASLSQHPPSLCISDSEEEEEE	ALEAASLSQH(0.998)PPSLCISDSEEEEEER(0.002)
O43166	1561	1	71.2512	106.26	H	DLESPTPESQKSFKFHALSSPQSPFPSTPTS	FH(1)ALSSPQSPFPSTPTSR
O43166	1449	0.932636	10.7828	80.816	H	PVVFTSARSSPKEELHPAAPSQLAPSFSSSS	H(0.195)SASPVVFTSAR(0.94)SSPK(0.933)EELH(0.933)PAAPSQLAPSFSSSSSSSSGPR
O43294	40	0.984384	18.8649	70.003	H	KERPAEPLTPPPSYGHQPQTGSGESSGASGD	ER(0.013)PAEPLTPPPSYGH(0.984)QPQTGSGESSGASGDK(0.002)DHLYSTVCK
O43314	1059	0.999907	40.3368	49.525	H	PRTLVEQKQNPTVGSHCAGLFSTSVLGGSSS	QNPTVGSH(1)CAGLFSTSVLGGSSSAPNLQDYAR
O43353	352	0.956532	13.4262	70.57	H	VNHGPQEESCGSSQLHENSGSPETSRSLPAP	MELSLNIPVNH(0.043)GPQEESCGSSQLH(0.957)ENSGSPETSR
O43379	1354	0.978634	17.6643	63.297	H	FRPSLPAPESPGLPAHPSNPQLPEARPGIPG	LH(0.004)GSAFR(0.017)PSLPAPESPGLPAH(0.979)PSNPQLPEAR
O43474	259	1	84.3814	88.637	H	SPSVISVSKGSPDGSHPVVVAPYNGGPPRTC	GSPDGSH(1)PVVVAPYNGGPPR
O43825	76	0.99933	31.7396	96.113	H	TYTFRGFRSTKSETNHSSLRNIWKETVPQTL	GFRSTKSETNH(0.999)SSLR(0.001)
O60244	1135	0.998188	27.7463	107.09	H	PAARMPGMSPANPSLHSPVPDASHSPRAGTS	MPGMSPANPSLH(0.998)SPVPDASH(0.002)SPR
O60245	1043	0.998477	28.162	74.622	H	NTFVGAGDNISIGSDHCSEYSCQTNNKYSKQ	H(0.003)QAVQDLPPANTFVGAGDNISIGSDH(0.998)CSEYSCQTNNK(0.999)
O60245	1008	0.999969	42.4779	80.362	H	ARHYKSSSPLPTVQLHPQSPTAGKKHQAVQD	SSSPLPTVQLH(1)PQSPTAGK(0.556)K(0.444)
O60256	211	0.926256	12.205	58.5	H	AQSFAERLRLGIAVIHGEAQDAESDLVDGRH	LGIAVIH(0.926)GEAQDAESDLVDGR(0.056)H(0.018)SPPMVR
O60266	584	1	73.0368	126.48	H	LQDLADRVVDASEDEHELNQLLNEALLERES	VVDASEDEH(1)ELNQLLNEALLER
O60271	180	1	82.4912	99.371	H	EMIHNYMEHLERTKLHQLSGSDQLESTAHSR	LH(1)QLSGSDQLESTAHSR
O60292	1684	0.989814	23.8181	52.402	H	FSLNDPALSPDIPPAHSPVHSHLSLERGPPT	AVSLFSLNDPALSPDIPPAH(0.99)SPVH(0.003)SH(0.004)LSLER(0.003)
O60503	13	0.840486	10.9828	54.465	H	___MASPPHQQLLHHHSTEVSCDSSGDSNSV	ASPPH(0.024)QQLLH(0.067)H(0.067)H(0.84)STEVSCDSSGDSNSVR(0.002)
O60504	598	0.991915	20.985	64.589	H	LGTPGPALSHSRGPSHPLDLGTSSPNTSQIH	GPSH(0.992)PLDLGTSSPNTSQIH(0.008)WTPYR
O60522	846	0.981388	17.9591	43.38	H	RQWSRALISGIQSVEHVNVTFVDYGDREMVS	QWSR(0.003)ALISGIQSVEH(0.981)VNVTFVDYGDR(0.016)
O60543	114	0.999229	31.1514	63.662	H	FMILEKGQKWMPGSQHVPTCSPPKRSGIARV	WMPGSQH(0.999)VPTCSPPK(0.096)R(0.338)SGIAR(0.567)
O60610	344	1	65.8417	65.842	H	DFRVHIRSELMRLGLHQVLQDLREIENEDMR	LGLH(1)QVLQDLR(1)EIENEDMR(1)
O60706	1069	0.999836	37.8517	65.5	H	SLTVEWMGLTAAKNLHHNLLNKIILGPIRFF	NLH(1)H(1)NLLNK(0.999)IILGPIR(0.001)
O60706	1070	0.999836	37.8517	65.5	H	LTVEWMGLTAAKNLHHNLLNKIILGPIRFFD	NLH(1)H(1)NLLNK(0.999)IILGPIR(0.001)
O60885	1069	0.981295	17.0551	53.39	H	YSTGHLREAPSPLMIHSPQMSQFQSLTHQSP	EAPSPLMIH(0.981)SPQMSQFQSLTH(0.968)QSPPQQNVQPK(0.051)
O60885	1081	0.96814	14.7421	60.687	H	LMIHSPQMSQFQSLTHQSPPQQNVQPKKQEL	EAPSPLMIH(0.981)SPQMSQFQSLTH(0.968)QSPPQQNVQPK(0.051)
O75116	1127	1	68.9674	97.312	H	KDSDIEQLRSQLQALHIGLDSSSIGSGPGDA	SQLQALH(1)IGLDSSSIGSGPGDAEADDGFPESR
O75179	2037	1	149.724	220.4	H	TAPTNATYPMPTAKEHYPVSSPSSPSPPAQP	EH(1)YPVSSPSSPSPPAQPGGVSR
O75182	3	0.993013	21.5663	53.342	H	_____________MAHAGGGSGGSGAGGPAG	MAH(0.993)AGGGSGGSGAGGPAGR(0.007)GLSGAR
O75290	239	0.788547	6.72625	61.821	H	NECGKAFSLLTLLNRHKNIHTGEKLFECKEC	AFSLLTLLNR(0.056)H(0.789)K(0.208)NIH(0.909)TGEK(0.039)
O75290	243	0.908796	11.6322	61.821	H	KAFSLLTLLNRHKNIHTGEKLFECKECGKSF	AFSLLTLLNR(0.056)H(0.789)K(0.208)NIH(0.909)TGEK(0.039)
O75290	41	1	55.9069	55.907	H	DQRTLYRDVMLENYSHLISLGSSISKPDVIT	DVMLENYSH(1)LISLGSSISK(1)
O75410	265	1	66.463	90.689	H	TNAAVEGTPLPKASYHFSPEELDENTSPLLG	ASYH(1)FSPEELDENTSPLLGDAR
O75533	260	0.998555	28.4152	69.551	H	PGATPGSKIWDPTPSHTPAGAATPGRGDTPG	IWDPTPSH(0.999)TPAGAATPGR(0.995)GDTPGH(0.007)ATPGHGGATSSAR
O75533	276	0.998054	32.3214	68.041	H	TPAGAATPGRGDTPGHATPGHGGATSSARKN	IWDPTPSH(0.992)TPAGAATPGR(0.996)GDTPGH(0.998)ATPGH(0.011)GGATSSAR(0.003)
O75592	2922	0.834265	7.11762	55.985	H	DSTDSPGSENRAPSPHVVQENLHSEVVEVCT	APSPH(0.834)VVQENLH(0.162)SEVVEVCTSSTLK(0.004)
O75717	409	0.998784	30.3581	85.182	H	SLLKEEEEDGQEGSIHNLPLVTSQRPFYDGP	TGSSLLK(0.001)EEEEDGQEGSIH(0.999)NLPLVTSQRPFYDGPMPTPR
O75844	456	0.93231	11.3924	70.345	H	DNLGFPVSDWLFSMWHYSHPPLLERLQALKT	DNLGFPVSDWLFSMWH(0.932)YSH(0.068)PPLLER
O75896	61	0.840006	8.11832	66.467	H	TRRGSMFYDEDGDLAHEFYEETIVTKNGQKR	R(0.03)GSMFYDEDGDLAH(0.84)EFYEETIVTK(0.13)
O75909	19	0.961425	14.2764	77.1	H	NKENSSPSVTSANLDHTKPCWYWDKKDLAHT	ENSSPSVTSANLDH(0.961)TK(0.036)PCWYWDK(0.001)K(0.001)
O75925	500	1	77.7472	123.75	H	SPTSPLNNKGILSLPHQASPVSRTPSLPAVD	GILSLPH(1)QASPVSR
O94822	1559	0.95454	13.5331	41.423	H	EELQLSIRETTMLPYHIPHLACSVYHMTLKD	ETTMLPYH(0.955)IPH(0.046)LACSVYH(0.413)MTLK(0.481)DLPAMVR(0.105)
O94826	98	1	68.1967	99.238	H	RKTPEGRASPAPGSGHPEGPGAHLDMNSLDR	ASPAPGSGH(1)PEGPGAHLDMNSLDR
O94842	184	1	79.297	97.081	H	PEDRLSTTPSPTSSLHEDGVEDFRRQLPSQK	LSTTPSPTSSLH(1)EDGVEDFRR
O94875	172	0.999997	56.4736	88.637	H	SPNAFKDASSPVPPPHVPPPVPPLRPRDRSS	DASSPVPPPH(1)VPPPVPPLRPR
O94933	10	0.870471	8.27691	70.056	H	______MKPSIAEMLHRGRMLWIILLSTIAL	KPSIAEMLH(0.87)R(0.129)
O94972	252	0.999786	39.1209	58.674	H	LISKSSEILMMFQQVHRKPMASFVTTPVPPD	SELISKSSEILMMFQQVH(1)R(1)
O95169	31	0.992998	22.2106	65.374	H	RASRNVMPLGARTASHMTKDMFPGPYPRTPE	ASRNVMPLGAR(0.001)TASH(0.993)MTK(0.006)
O95197	565	0.925699	11.0797	68.961	H	KTSKNFEELVSDSELHQDQPDILGRSPASEA	NFEELVSDSELH(0.926)QDQPDILGR(0.002)SPASEAACSK(0.072)
O95251	213	0.981364	17.2192	63.374	H	GKHERHFSISGCPLYHNLSADECKVRAQSRD	HFSISGCPLYH(0.981)NLSADECK(0.019)
O95297	235	0.991476	20.6706	96.777	H	PSDTEGLVKSLPSGSHQGPVIYAQLDHSGGH	SLPSGSH(0.991)QGPVIYAQLDHSGGHHSDK(0.008)
O95352	686	0.999912	40.5671	42.399	H	SSHSFLEDLTGLTLLHQETQAAEIWDMSDDE	VFNSSHSFLEDLTGLTLLH(1)QETQAAEIWDMSDDETI
O95400	240	0.999992	51.2258	60.18	H	LAMRLKGLGCQTLGPHNPTPPPSLDMFAEEL	GLGCQTLGPH(1)NPTPPPSLDMFAEELAEEELETPTPTQR
O95402	348	0.805461	6.48379	78.378	H	PSAESPVCWLEQPESHQRLAGPGCKAGLSPA	R(0.181)LELLPSAESPVCWLEQPESH(0.805)QR(0.014)
O95425	218	1	88.9604	95.236	H	ENQRRGQELSATRQAHDLSPAAESSSTFSFS	QAH(1)DLSPAAESSSTFSFSGR
O95503	226	0.999169	30.8024	101.33	H	KSKKFSESVLRTQIRHMKFGAFALYKPPPAP	H(0.999)MK(0.001)FGAFALYK
O95544	27	0.999978	47.5424	62.781	H	KELSPDAAAYCCSACHGDETWSYNHPIRGRA	ELSPDAAAYCCSACH(1)GDETWSYNHPIR
O95613	603	0.999847	38.3321	93.92	H	ESLPRFQAELEESHRHQLEALESPLCIQHEG	H(1)QLEALESPLCIQHEGHVSDR
O95684	155	0.944445	15.1049	68.705	H	KGPTTGEGALDLSDVHSPPKSPEGKTSAQTT	EKGPTTGEGALDLSDVH(0.944)SPPK(0.029)SPEGK(0.026)
O95714	1363	0.82326	9.30277	45.842	H	TSQIHYSYNEEKDEDHCSSPGGTPASKSRLC	WLQSSIFSGGLQTSQIH(0.097)YSYNEEK(0.052)DEDH(0.823)CSSPGGTPASK(0.028)
O95718	422	1	69.6504	69.65	H	VQHFYSVKLQGKVPMHKLFLEMLEAKV____	VPMH(1)K(1)LFLEMLEAK(1)V
O95785	1150	0.998786	29.1532	125.04	H	PLAKKLPPPPGSPLGHSPTASPPPTARKMFP	K(0.001)LPPPPGSPLGH(0.999)SPTASPPPTAR
O95819	693	0.973532	17.2902	77.469	H	GSSSGSSNSGSQPGSHPGSQSGSGERFRVRS	LVPR(0.018)PGSGSSSGSSNSGSQPGSH(0.974)PGSQSGSGER(0.008)
O95819	612	0.839297	7.2158	51.398	H	PSRSESFSNGNSESVHPALQRPAEPQVPVRT	SESFSNGNSESVH(0.839)PALQR(0.159)PAEPQVPVR(0.001)
P00505	5	0.999953	42.9521	45.305	H	___________MALLHSGRVLPGIAAAFHPG	MALLH(1)SGR(1)VLPGIAAAFH(0.072)PGLAAAASAR(0.928)
P00533	988	1	100.927	126.31	H	RDPQRYLVIQGDERMHLPSPTDSNFYRALMD	MH(1)LPSPTDSNFYR
P01106	287	0.782694	8.25519	79.511	H	APGKRSESGSPSAGGHSKPPHSPLVLKRCHV	SESGSPSAGGH(0.783)SK(0.075)PPH(0.025)SPLVLK(0.117)
P04049	236	0.890913	11.5961	62.398	H	VSRMPVSSQHRYSTPHAFTFNTSSPSSEGSL	MPVSSQH(0.062)R(0.047)YSTPH(0.891)AFTFNTSSPSSEGSLSQR
P04049	264	1	86.5605	120.53	H	GSLSQRQRSTSTPNVHMVSTTLPVDSRMIED	STSTPNVH(1)MVSTTLPVDSR
P04920	453	0.932518	10.5348	55.871	H	FPRNISAGSLGSLLGHHHGQGAESDPHVTEP	NISAGSLGSLLGH(0.933)H(0.783)H(0.275)GQGAESDPH(0.01)VTEPLMGGVPETR
P04920	454	0.782838	5.34901	55.871	H	PRNISAGSLGSLLGHHHGQGAESDPHVTEPL	NISAGSLGSLLGH(0.933)H(0.783)H(0.275)GQGAESDPH(0.01)VTEPLMGGVPETR
P06493	162	1	107.494	120.31	H	FGLARAFGIPIRVYTHEVVTLWYRSPEVLLG	VYTH(1)EVVTLWYR
P06748	115	0.972995	15.6379	111.45	H	LRLKCGSGPVHISGQHLVAVEEDAESEDEEE	CGSGPVHISGQH(0.973)LVAVEEDAESEDEEEEDVK(0.027)
P06748	58	0.905701	11.5947	69.639	H	SLRTVSLGAGAKDELHIVEAEAMNYEGSPIK	TVSLGAGAK(0.063)DELH(0.906)IVEAEAMNYEGSPIK(0.017)VTLATLK(0.014)
P07355	17	0.969439	15.0135	121.21	H	STVHEILCKLSLEGDHSTPPSAYGSVKAYTN	LSLEGDH(0.969)STPPSAYGSVK(0.031)
P07919	62	1	83.0368	97.291	H	RERLELCDERVSSRSHTEEDCTEELFDFLHA	SH(1)TEEDCTEELFDFLHAR
P07947	31	0.997325	25.6717	49.356	H	YRPENTPEPVSTSVSHYGAEPTTVSPCPSSS	YR(0.012)PENTPEPVSTSVSH(0.997)YGAEPTTVSPCPSSSAK(0.99)
P08235	249	0.986285	18.8912	86.539	H	PLTCSPNVENRGSRSHSPAHASNVGSPLSSP	SH(0.986)SPAH(0.013)ASNVGSPLSSPLSSMK(0.001)
P08559	290	0.994337	22.4458	160.91	H	SGKGPILMELQTYRYHGHSMSDPGVSYRTRE	YH(0.994)GH(0.006)SMSDPGVSYR
P08559	292	0.99941	32.2869	141.89	H	KGPILMELQTYRYHGHSMSDPGVSYRTREEI	YH(0.001)GH(0.999)SMSDPGVSYR
P08648	11	0.980349	16.9804	67.334	H	_____MGSRTPESPLHAVQLRWGPRRRPPLL	MGSRTPESPLH(0.98)AVQLR(0.02)
P08651	374	0.859321	7.85962	54.324	H	VHSGIARSPHPSSALHFPTTSILPQTASTYF	SPH(0.141)PSSALH(0.859)FPTTSILPQTASTYFPHTAIR
P09234	15	0.999946	42.637	80.488	H	_MPKFYCDYCDTYLTHDSPSVRKTHCSGRKH	FYCDYCDTYLTH(1)DSPSVR
P0C7T5	213	0.849366	7.51177	71.54	H	FNKAPSATSPSGQLPHHSSTQPLDLAPGRMP	APSATSPSGQLPH(0.849)H(0.151)SSTQPLDLAPGR
P0CF97	329	0.808178	6.95155	52.045	H	LEVTNNGAVWNHCFIHREGLASREIPQNLME	VIK(1)K(1)LLEVTNNGAVWNH(0.029)CFIH(0.808)R(0.163)
Q3ZM63	45	0.783373	6.09348	72.662	H	TENVLIFLINRQLGRHRSDIDLSRWVWMLS_	PTENVLIFLINR(0.217)QLGR(0.783)H(0.783)R(0.217)
P0DTE2	74	0.934322	11.592	53.504	H	GKGLEWVAVIWRGESHQYNADYVRGRLTTSR	GLEWVAVIWR(0.001)GESH(0.934)QYNADYVR(0.065)
P0DUX1	12	0.941515	12.0681	63.16	H	____MGQILGKIMMSHQPQPQEEQSPQRSTS	GQILGK(0.058)IMMSH(0.942)QPQPQEEQSPQR
P10074	178	0.811252	8.29352	73.459	H	DQEPRGSHSPQRPQLHSPAQSEGPSSLCGKL	GSH(0.004)SPQR(0.064)PQLH(0.811)SPAQSEGPSSLCGK(0.12)
P10144	30	0.928873	12.9331	44.829	H	RADAGEIIGGHEAKPHSRPYMAYLMIWDQKS	PH(0.929)SR(0.772)PYMAYLMIWDQK(0.161)SLK(0.139)
P10398	219	1	84.4631	85.697	H	NAPLQRIRSTSTPNVHMVSTTAPMDSNLIQL	STSTPNVH(1)MVSTTAPMDSNLIQLTGQSFSTDAAGSR
P11172	211	0.953578	13.1264	90.316	H	RVKRFIQENVFVAANHNGSPLSIKEAPKELS	RFIQENVFVAANH(0.954)NGSPLSIK(0.046)
P11274	423	0.999931	41.5806	55.022	H	RKTGQIWPNDGEGAFHGDADGSFGTPPGYGC	TGQIWPNDGEGAFH(1)GDADGSFGTPPGYGCAADR
P11717	2403	0.903716	9.72479	83.065	H	NGHITTKSVKALSSLHGDDQDSEDEVLTIPE	ALSSLH(0.904)GDDQDSEDEVLTIPEVK(0.096)
P11940	595	0.999888	39.5156	58.914	H	KITGMLLEIDNSELLHMLESPESLRSKVDEA	ITGMLLEIDNSELLH(1)MLESPESLR
P12111	1725	0.861088	7.96572	83.877	H	VYKGGRHANTKVGLEHLRVNHFVPEAGSRLD	GGR(0.577)H(0.423)ANTKVGLEH(0.861)LR(0.139)
P12270	2125	0.825585	6.75334	57.076	H	GRGLQLTPGIGGMQQHFFDDEDRTVPSTPTL	GLQLTPGIGGMQQH(0.826)FFDDEDR(0.174)TVPSTPTLVVPHR
P12270	2154	1	88.3657	134.13	H	TLVVPHRTDGFAEAIHSPQVAGVPRFRFGPP	TDGFAEAIH(1)SPQVAGVPR
P12277	296	1	63.2903	63.29	H	LTCPSNLGTGLRAGVHIKLPNLGKHEKFSEV	AGVH(1)IK(1)LPNLGK(1)H(1)EK(1)
P12277	305	1	63.2903	63.29	H	GLRAGVHIKLPNLGKHEKFSEVLKRLRLQKR	AGVH(1)IK(1)LPNLGK(1)H(1)EK(1)
P12694	336	0.814291	5.63092	72.769	H	NQPFLIEAMTYRIGHHSTSDDSSAYRSVDEV	IGH(0.349)H(0.814)STSDDSSAYR(0.821)SVDEVNYWDK(0.016)QDHPISR
P12931	25	0.998943	29.7555	90.899	H	DASQRRRSLEPAENVHGAGGGAFPASQTPSK	SLEPAENVH(0.999)GAGGGAFPASQTPSK(0.001)PASADGHR
P13378	69	0.985466	20.4501	94.48	H	YGNSAAGFPHAPPQAHAHPHPSPPPSGTGCG	HAAAAAALQLYGNSAAGFPH(0.009)APPQAH(0.985)AH(0.004)PH(0.001)PSPPPSGTGCGGR
P13533	668	0.94904	13.6052	45.28	H	HRENLNKLMTNLRTTHPHFVRCIIPNERKAP	LMTNLR(0.022)TTH(0.949)PH(0.949)FVR(0.079)CIIPNER(0.001)
P13533	670	0.94904	13.6052	45.28	H	ENLNKLMTNLRTTHPHFVRCIIPNERKAPGV	LMTNLR(0.022)TTH(0.949)PH(0.949)FVR(0.079)CIIPNER(0.001)
P13611	22	0.902294	11.7601	47.646	H	SILWMCSTLIVTHALHKVKVGKSPPVRGSLS	MFINIK(0.104)SILWMCSTLIVTH(0.152)ALH(0.902)K(0.937)VK(0.905)
P14222	222	1	64.8903	75.739	H	STQPAYLRLISNYGTHFIRAVELGGRISALT	LISNYGTH(1)FIR(0.978)AVELGGR(0.022)
P14618	19	0.805034	9.17419	51.296	H	PHSEAGTAFIQTQQLHAAMADTFLEHMCRLD	SK(0.097)PH(0.097)SEAGTAFIQTQQLH(0.805)AAMADTFLEHMCR
P15408	22	0.908496	9.40296	50.88	H	GNFDTSSRGSSGSPAHAESYSSGGGGQQKFR	MYQDYPGNFDTSSR(0.889)GSSGSPAH(0.908)AESYSSGGGGQQK(0.202)
P15408	80	0.999971	45.4909	99.273	H	QPTVITSMSNPYPRSHPYSPLPGLASVPGHM	SH(1)PYSPLPGLASVPGHMALPR
P15924	413	0.966275	14.6662	69.261	H	SIRKKYPCDKNMPLQHLLEQIKELEKEREKI	YPCDK(0.001)NMPLQH(0.966)LLEQIK(0.033)
P16070	711	0.87654	8.5127	60.938	H	PSGLNGEASKSQEMVHLVNKESSETPDQFMT	SQEMVH(0.877)LVNK(0.123)ESSETPDQFMTADETR
P16144	1472	0.999105	30.645	65.949	H	SLHRMTTTSAAAYGTHLSPHVPHRVLSTSST	MTTTSAAAYGTH(0.999)LSPH(0.001)VPHR
P17020	61	0.885451	8.90777	73.077	H	GTPCCSDTELEAICPHYQQPDCDTRTEDKEF	VR(0.001)DAPAVTH(0.114)PGSAACGTPCCSDTELEAICPH(0.885)YQQPDCDTR
P17483	128	0.853465	8.52003	46.772	H	VSSSPPPPPCAQNPLHPSPSHSACKEPVVYP	CEAVSSSPPPPPCAQNPLH(0.853)PSPSH(0.12)SACK(0.026)EPVVYPWMR
P17544	430	0.999936	41.9719	48.626	H	KESSEPTGSPAPVIQHSSATAPSNGLSVRSA	ESSEPTGSPAPVIQH(1)SSATAPSNGLSVR
P17544	250	0.909925	10.044	51.089	H	PGPPVNSSGSISPSGHPIPSEAKMRLKATLT	PVSMVPNIPGIPGPPVNSSGSISPSGH(0.91)PIPSEAK(0.09)
P18583	2127	0.893189	14.2556	102.21	H	IAQSKEDDDVIVNKPHVSDEEEEEPPFYHHP	QIAQSK(0.026)EDDDVIVNK(0.034)PH(0.893)VSDEEEEEPPFYH(0.021)H(0.023)PFK(0.002)
P19484	326	0.995587	23.533	114.37	H	QLWLRIQELEMQARVHGLPTTSPSGMNMAEL	VH(0.996)GLPTTSPSGMNMAELAQQVVK(0.004)
P19827	188	0.9989	29.5812	68.277	H	MQYEIVIKVKPKQLVHHFEIDVDIFEPQGIS	QLVH(0.999)H(1)FEIDVDIFEPQGISK(0.001)
P19827	189	0.999865	38.6951	68.277	H	QYEIVIKVKPKQLVHHFEIDVDIFEPQGISK	QLVH(0.999)H(1)FEIDVDIFEPQGISK(0.001)
P20020	1142	0.999936	42.0195	79.633	H	SLYEGLEKPESRSSIHNFMTHPEFRIEDSEP	SSIH(1)NFMTHPEFR
P20393	318	0.999963	45.9947	61.963	H	AHDKLGSSPGNFNANHASGSPPATTPHRWEN	LGSSPGNFNANH(1)ASGSPPATTPHR
P20908	196	0.999999	61.9313	68.173	H	LDCKKKTTKFLDRSDHPMIDINGIIVFGTRI	SDH(1)PMIDINGIIVFGTR
P21333	2159	0.916916	11.0476	89.751	H	ITRRRRAPSVANVGSHCDLSLKIPEISIQDM	APSVANVGSH(0.917)CDLSLK(0.072)IPEISIQDMTAQVTSPSGK(0.011)
P21333	2058	0.824967	8.8771	54.12	H	EIGDASRVRVSGQGLHEGHTFEPAEFIIDTR	VR(0.068)VSGQGLH(0.825)EGH(0.107)TFEPAEFIIDTR
P21333	2061	0.99997	45.6127	101.33	H	DASRVRVSGQGLHEGHTFEPAEFIIDTRDAG	VRVSGQGLHEGH(1)TFEPAEFIIDTR
P21452	232	0.946893	12.5043	61.127	H	YSVIGLTLWRRAVPGHQAHGANLRHLQAMKK	R(0.056)AVPGH(0.947)QAH(0.997)GANLRHLQAMK
P21452	235	0.996571	24.6758	61.127	H	IGLTLWRRAVPGHQAHGANLRHLQAMKKFVK	R(0.056)AVPGH(0.947)QAH(0.997)GANLRHLQAMK
P22670	203	0.860211	7.93795	89.659	H	KGGQVSLTVHGTQQVHSPPEQSPVQANSSSS	GGQVSLTVH(0.001)GTQQVH(0.86)SPPEQSPVQANSSSSK(0.138)
P23497	280	0.995916	23.892	53.209	H	PCPLPCDEESPEAELHNHGIQINSCSVRLVD	EMPCPLPCDEESPEAELH(0.996)NH(0.004)GIQINSCSVR
P23497	26	0.999942	42.9666	114.66	H	RRLNECISPVANEMNHLPAHSHDLQRMFTED	RLNECISPVANEMNH(1)LPAHSHDLQR
P23497	194	0.959484	16.0397	51.479	H	NSFRSLTWPPSGSPSHAGTTPPENGLSEHPC	SLTWPPSGSPSH(0.959)AGTTPPENGLSEH(0.024)PCETEQINAK(0.017)
P24941	161	1	121.47	134.26	H	FGLARAFGVPVRTYTHEVVTLWYRAPEILLG	TYTH(1)EVVTLWYR
P25054	1092	1	112.847	148.56	H	VYTESTDDKHLKFQPHFGQQECVSPYRSRGA	FQPH(1)FGQQECVSPYR
P26045	393	0.999994	51.8759	102.46	H	NWRSPRLRHEIRKPRHSSADNLANEMTYITE	H(1)SSADNLANEMTYITETEDVFYTYK
P26641	39	0.844348	7.35746	128.57	H	YSGAQVRVLSAPPHFHFGQTNRTPEFLRKFP	VLSAPPHFH(0.844)FGQTNR(0.155)TPEFLR
P27708	1911	0.995021	26.5593	75.11	H	PRQASPQNLGTPGLLHPQTSPLLHSLVGQHI	QASPQNLGTPGLLH(0.995)PQTSPLLH(0.002)SLVGQH(0.001)ILSVQQFTK(0.002)
P27816	89	0.930338	11.2564	59.943	H	EDTPSSKPTLLANGGHGVEGSDTTGSPTEFL	PTLLANGGH(0.93)GVEGSDTTGSPTEFLEEK(0.07)
P28290	481	0.803394	8.42201	60.009	H	SFEMEEVQSTEGEAPHVPATYQLGLTKSKRD	NIMTQQK(0.116)DSFEMEEVQSTEGEAPH(0.803)VPATYQLGLTK(0.081)
P28290	617	1	68.3503	68.43	H	IENTGTKQSTCSPGDHIIEITEVEEDLFPAE	QSTCSPGDH(1)IIEITEVEEDLFPAETVELLR
P28290	439	0.955091	13.2771	97.776	H	SSHSELENSSELKSVHISTPEKEPCAPLTIP	SVH(0.955)ISTPEK(0.045)EPCAPLTIPSIR
P28290	868	1	96.1242	98.073	H	WQERPLCEHTRTLSTHSVPNISGATCSAFAS	TLSTH(1)SVPNISGATCSAFASPFGCPYSHR
P28329	494	0.984466	16.5932	69.259	H	APRRLRWKCSPEIQGHLASSAEKLQRIVKNL	LRWK(0.291)CSPEIQGH(0.984)LASSAEK(0.724)
P29320	679	0.999999	56.9566	60.938	H	RRDFLGEASIMGQFDHPNIIRLEGVVTKSKP	QR(0.5)R(0.5)DFLGEASIMGQFDH(1)PNIIR(1)
P29590	521	0.999891	39.6482	73.707	H	PEQPRPSTSKAVSPPHLDGPPSPRSPVIGSE	AVSPPH(1)LDGPPSPR(1)SPVIGSEVFLPNSNHVASGAGEAEER
P31944	201	1	64.2227	78.692	H	CFIQTLVDVFTKRKGHILELLTEVTRRMAEA	K(1)GH(1)ILELLTEVTR
P33176	929	0.992846	21.9113	130.87	H	RGHSAQIAKPIRPGQHPAASPTHPSAIRGGG	PIR(0.006)PGQH(0.993)PAASPTH(0.001)PSAIR
P33176	936	0.969189	17.9965	171.49	H	AKPIRPGQHPAASPTHPSAIRGGGAFVQNSQ	PIR(0.015)PGQH(0.015)PAASPTH(0.969)PSAIR
P35222	36	0.957154	13.5918	44.844	H	AVSHWQQQSYLDSGIHSGATTTAPSLSGKGN	AAVSH(0.001)WQQQSYLDSGIH(0.957)SGATTTAPSLSGK(0.042)
P35637	275	0.999959	43.8606	65.69	H	GGFNKFGGPRDQGSRHDSEQDNSDNNTIFVQ	H(1)DSEQDNSDNNTIFVQGLGENVTIESVADYFK
P35658	1084	0.999993	52.6344	148.62	H	MLATKTVKHGAPSPSHPISAPQAAAAAALRR	HGAPSPSH(1)PISAPQAAAAAALR
P36507	292	0.994081	23.9026	79.029	H	AIFGRPVVDGEEGEPHSISPRPRPPGRPVSG	ELEAIFGR(0.004)PVVDGEEGEPH(0.994)SISPR(0.002)
P36507	308	0.947499	12.5642	133.42	H	SISPRPRPPGRPVSGHGMDSRPAMAIFELLD	PRPPGR(0.053)PVSGH(0.947)GMDSR
P36871	118	0.935183	11.592	56.304	H	IRKIKAIGGIILTASHNPGGPNGDFGIKFNI	AIGGIILTASH(0.935)NPGGPNGDFGIK(0.065)
P37275	157	0.999999	62.9762	63.803	H	APEEDQRQGTPEASGHDENGTPDAFSQLLTC	QGTPEASGH(1)DENGTPDAFSQLLTCPYCDR
P38398	117	0.96039	13.8464	118.84	H	ANSYNFAKKENNSPEHLKDEVSIIQSMGYRN	ENNSPEH(0.96)LK(0.04)DEVSIIQSMGYR
P38398	1195	0.998672	28.7624	73.219	H	SVQKGELSRSPSPFTHTHLAQGYRRGAKKLE	SPSPFTH(0.999)TH(0.001)LAQGYR
P38398	1545	0.999979	46.8678	58.284	H	KVVDVEEQQLEESGPHDLTETSYLPRQDLEG	VVDVEEQQLEESGPH(1)DLTETSYLPR
P39880	1214	0.999681	34.9864	64.726	H	MDMKRMEKKAYMKRRHSSVSDSQPCEPPSVG	H(1)SSVSDSQPCEPPSVGTEYSQGASPQPQHQLK
P39880	1242	0.840863	7.22958	71.159	H	SVGTEYSQGASPQPQHQLKKPRVVLAPEEKE	RHSSVSDSQPCEPPSVGTEYSQGASPQPQH(0.841)QLK(0.159)
P40189	662	1	91.0735	170.47	H	IKKHIWPNVPDPSKSHIAQWSPHTPPRHNFN	SH(1)IAQWSPHTPPR
P40617	116	0.995318	21.5281	65.836	H	DSVDVERMEEAKTELHKITRISENQGVPVLI	TELH(0.995)K(0.334)ITR(0.89)ISENQGVPVLIVANK(0.78)
P40939	753	0.989523	22.3605	91.616	H	AAYGKQFTPCQLLADHANSPNKKFYQ_____	QFTPCQLLADH(0.99)ANSPNK(0.006)K(0.005)
P41002	773	1	138.663	142.74	H	SSVPQQQVKRINLCIHSEEEDMNLGLVRL__	INLCIH(1)SEEEDMNLGLVR
P41162	158	0.999752	36.1387	83.252	H	VPTASSRFHFPPLDTHSPTNDVQPGRFSASS	FHFPPLDTH(1)SPTNDVQPGR
P41236	76	0.999999	58.5212	70.666	H	KDYGLMKIDEPSTPYHSMMGDDEDACSDTEA	IDEPSTPYH(1)SMMGDDEDACSDTEATEAMAPDILAR
P42167	304	1	120.825	134.37	H	SNESLVVNRVTGNFKHASPILPITEFSDIPR	H(1)ASPILPITEFSDIPR
P42694	1627	0.999993	51.4366	126.63	H	SRSPPAVPSPPSSTDHSSHFSNFNDNSRDIE	SPPAVPSPPSSTDH(1)SSH(1)FSNFNDNSR
P42694	1630	0.999996	54.2336	83.966	H	PPAVPSPPSSTDHSSHFSNFNDNSRDIEVAS	SPPAVPSPPSSTDH(1)SSH(1)FSNFNDNSR
P43243	241	0.78592	8.15233	59.996	H	DGERCRDDSFFGETSHNYHKFDSEYERMGRG	CR(0.013)DDSFFGETSH(0.786)NYH(0.081)K(0.12)FDSEYER
P43243	70	0.830373	6.8978	71.688	H	LMNLGMSSSLNQQGAHSALSSASTSSHNLQS	LASLMNLGMSSSLNQQGAH(0.83)SALSSASTSSH(0.17)NLQSIFNIGSR
P43354	239	0.998169	27.7794	76.818	H	IRKPASMGFPGLQIGHASQLLDTQVPSPPSR	K(0.002)PASMGFPGLQIGH(0.998)ASQLLDTQVPSPPSR
P43487	23	0.999098	32.9716	81.197	H	HEDHDTSTENTDESNHDPQFEPIVSLPEQEI	DTHEDH(0.001)DTSTENTDESNH(0.999)DPQFEPIVSLPEQEIK
P46087	489	0.980093	17.0825	98.592	H	AVKTNKDEKDILRCAHLQKELLLSAIDSVNA	CAH(0.98)LQK(0.019)ELLLSAIDSVNATSK(0.001)
P46100	638	1	106.997	119.34	H	KLEKCGLGQENSDNEHLVENEVSLLLEESDL	CGLGQENSDNEH(1)LVENEVSLLLEESDLRR
P46379	93	1	73.172	115.06	H	GGKVIHLVERAPPQTHLPSGASSGTGSASAT	APPQTH(1)LPSGASSGTGSASATHGGGSPPGTR
P46379	109	0.997694	26.8674	64.298	H	LPSGASSGTGSASATHGGGSPPGTRGPGASV	APPQTH(0.002)LPSGASSGTGSASATH(0.998)GGGSPPGTR
P46531	2125	0.992029	23.6576	43.462	H	VRLLDEYNLVRSPQLHGAPLGGTPTLSPPLC	SPQLH(0.992)GAPLGGTPTLSPPLCSPNGYLGSLK(0.004)PGVQGK(0.004)
P46821	1815	1	125.308	165.78	H	FSDSTSAVKEKTATCHSSSSPPIDAASAEPY	TATCH(1)SSSSPPIDAASAEPYGFR
P46821	1678	0.998115	27.72	83.874	H	SRQSPDHPTVGAGVLHITENGPTEVDYSPSD	QSPDHPTVGAGVLH(0.998)ITENGPTEVDYSPSDMQDSSLSHK(0.002)
P46821	1333	1	46.772	52.276	H	LEVVSPSQSVTGSAGHTPYYQSPTDEKSSHL	TLEVVSPSQSVTGSAGH(1)TPYYQSPTDEK(1)
P46937	126	1	98.2052	125.86	H	DAGTAGALTPQHVRAHSSPASLQLGAVSPGT	AH(1)SSPASLQLGAVSPGTLTPTGVVSGPAATPTAQHLR
P46937	159	0.999996	54.4525	75.261	H	PTGVVSGPAATPTAQHLRQSSFEIPDDVPLP	AHSSPASLQLGAVSPGTLTPTGVVSGPAATPTAQH(1)LR(1)
P48059	213	0.799695	6.02744	52.365	H	RPIEGRVVNAMGKQWHVEHFVCAKCEKPFLG	VVNAMGK(0.2)QWH(0.8)VEH(0.955)FVCAK(0.019)CEK(0.025)
P48059	216	0.955193	15.7168	52.365	H	EGRVVNAMGKQWHVEHFVCAKCEKPFLGHRH	VVNAMGK(0.2)QWH(0.8)VEH(0.955)FVCAK(0.019)CEK(0.025)
P49759	335	0.977347	16.3492	126.5	H	DIKVVDFGSATYDDEHHSTLVSTRHYRAPEV	VVDFGSATYDDEH(0.977)H(0.023)STLVSTR
P49760	150	0.999942	42.4074	74.325	H	HSSRRAKSVEDDAEGHLIYHVGDWLQERYEI	SVEDDAEGH(1)LIYHVGDWLQER
P49792	922	0.999361	32.0386	69.7	H	RLPPQQHIYAYPQQMHTPPVQSSSACMFSQE	LPPQQH(0.001)IYAYPQQMH(0.999)TPPVQSSSACMFSQEMYGPPALR
P49792	1162	0.965496	14.6187	72.221	H	LETANKNHETDGGSAHGDDDDDGPHFEPVVP	NHETDGGSAH(0.965)GDDDDDGPH(0.033)FEPVVPLPDKIEVK(0.001)
P49792	1171	0.825474	7.28145	63.893	H	TDGGSAHGDDDDDGPHFEPVVPLPDKIEVKT	NH(0.001)ETDGGSAH(0.154)GDDDDDGPH(0.825)FEPVVPLPDK(0.004)IEVK(0.016)
P50402	131	0.944417	11.5468	100.95	H	AVRQSVTSFPDADAFHHQVHDDDLLSSSEEE	QSVTSFPDADAFH(0.944)H(0.804)QVH(0.245)DDDLLSSSEEECK(0.006)DR(0.001)
P50402	132	0.804055	5.94371	100.95	H	VRQSVTSFPDADAFHHQVHDDDLLSSSEEEC	QSVTSFPDADAFH(0.944)H(0.804)QVH(0.245)DDDLLSSSEEECK(0.006)DR(0.001)
P50402	135	0.783499	7.06598	72.231	H	SVTSFPDADAFHHQVHDDDLLSSSEEECKDR	QSVTSFPDADAFH(0.043)H(0.154)QVH(0.783)DDDLLSSSEEECK(0.019)DR
P50443	9	0.999303	33.3124	59.912	H	_______MSSESKEQHNVSPRDSAEGNDSYP	EQH(0.999)NVSPR(1)DSAEGNDSYPSGIH(0.001)LELQR
P50548	317	1	87.9903	161.62	H	HFSFSPEDMKRYLQAHTQSVYNYHLSPRAFL	YLQAH(1)TQSVYNYHLSPR
P50548	325	0.957248	13.5014	72.315	H	MKRYLQAHTQSVYNYHLSPRAFLHYPGLVVP	YLQAHTQSVYNYH(0.957)LSPR(0.043)
P50570	763	0.994761	22.7843	96.024	H	VPPPVDDTWLQSASSHSPTPQRRPVSSIHPP	EALNIIGDISTSTVSTPVPPPVDDTWLQSASSH(0.995)SPTPQR(0.005)
P51587	739	0.992265	21.0756	48.422	H	KKVSDIKEEVLAAACHPVQHSKVEYSDTDFQ	VSDIK(0.009)EEVLAAACH(0.992)PVQH(0.999)SK(1)VEYSDTDFQSQK(1)
P51587	743	0.999105	30.4434	48.422	H	DIKEEVLAAACHPVQHSKVEYSDTDFQSQKS	VSDIK(0.009)EEVLAAACH(0.992)PVQH(0.999)SK(1)VEYSDTDFQSQK(1)
P51636	21	0.997542	26.0501	78.513	H	EKADVQLFMDDDSYSHHSGLEYADPEKFADS	ADVQLFMDDDSYSH(0.998)H(0.993)SGLEYADPEK(0.01)
P51636	22	0.992534	21.2259	78.513	H	KADVQLFMDDDSYSHHSGLEYADPEKFADSD	ADVQLFMDDDSYSH(0.998)H(0.993)SGLEYADPEK(0.01)
P51798	58	0.997115	25.3943	59.561	H	GAARQSPRSALFRVGHMSSVELDDELLDPDM	VGH(0.997)MSSVELDDELLDPDMDPPHPFPK(0.003)
P51825	375	0.975144	18.121	55.049	H	LKEMTHSWPPPLTAIHTPSTAEPSKFPFPTK	EMTH(0.001)SWPPPLTAIH(0.975)TPSTAEPSK(0.015)FPFPTK(0.009)
P52594	172	0.952202	12.1484	80.355	H	VKPLKSLLGDSAPTLHLNKGTPSQSPVVGRS	SLLGDSAPTLH(0.952)LNK(0.832)GTPSQSPVVGR(0.216)
P52701	130	1	128.165	186.41	H	FDGTFIREKGKSVRVHVQFFDDSPTRGWVSK	VH(1)VQFFDDSPTR
P52732	236	0.986701	18.1828	50.851	H	RTTAATLMNAYSSRSHSVFSVTIHMKETTID	SH(0.987)SVFSVTIH(0.916)MK(0.849)ETTIDGEELVK(0.218)IGK(0.031)
P52732	244	0.916218	10.0867	50.851	H	NAYSSRSHSVFSVTIHMKETTIDGEELVKIG	SH(0.987)SVFSVTIH(0.916)MK(0.849)ETTIDGEELVK(0.218)IGK(0.031)
P52789	129	0.87859	8.59531	64.265	H	IPEDIMRGSGTQLFDHIAECLANFMDKLQIK	GSGTQLFDH(0.879)IAECLANFMDK(0.121)
P52948	1763	0.751304	6.03082	65.887	H	AKRVANLLRVVLSLHHPPDRTSDSTPDPQRV	VVLSLH(0.187)H(0.751)PPDR(0.059)TSDSTPDPQR(0.002)VPLR
P54253	249	0.998358	27.8401	52.824	H	ITPGSPPPAQQNQYVHISSSPQNTGRTASPP	APGLITPGSPPPAQQNQYVH(0.998)ISSSPQNTGR(0.002)
P54278	514	0.953673	13.1358	73.616	H	TSVDSEGFSIPDTGSHCSSEYAASSPGDRGS	DSGHGSTSVDSEGFSIPDTGSH(0.954)CSSEYAASSPGDR(0.046)
P54687	351	1	58.4895	58.49	H	VVCPVSDILYKGETIHIPTMENGPKLASRIL	GETIH(1)IPTMENGPK(1)LASR(1)ILSK(1)
P55199	440	0.949238	13.0757	73.168	H	LGLPLLTDCAQPSRPHGSPSRSKPKKKSKKH	LGLPLLTDCAQPSR(0.004)PH(0.949)GSPSR(0.047)
P55735	67	0.988976	19.6292	47.018	H	DLRGHEGPVWQVAWAHPMYGNILASCSYDRK	GH(0.011)EGPVWQVAWAH(0.989)PMYGNILASCSYDR
P56270	301	0.935718	14.1735	107.75	H	KAFRDVYHLNRHKLSHSDEKPYQCPVCQQRF	H(0.002)K(0.027)LSH(0.936)SDEK(0.036)PYQCPVCQQR
P56524	479	0.993424	21.7915	89.803	H	RTQSAPLPQNAQALQHLVIQQQHQQFLEKHK	TQSAPLPQNAQALQH(0.993)LVIQQQHQQFLEK(0.007)
P56589	198	0.999998	56.7503	73.057	H	IKQAVQKVLGSVSLKHSLSLLDLEQKLKEIR	VLGSVSLK(1)H(1)SLSLLDLEQK(0.159)LK(0.841)
P57682	55	0.999244	28.3502	43.799	H	TPLPEKFFQTPEGLSHGIQMEPVDLTVNKRS	FFQTPEGLSH(0.999)GIQMEPVDLTVNK(0.483)R(0.518)
P58107	2723	1	84.1486	124.07	H	VSFRGLRRQVSASELHTSGILGPETLRDLAQ	QVSASELH(1)TSGILGPETLR
P60660	132	0.999944	43.4183	48.115	H	GEKMTEEEVEMLVAGHEDSNGCINYEAFVRH	MTEEEVEMLVAGH(1)EDSNGCINYEAFVR
P61952	5	1	89.6786	89.679	H	___________MPALHIEDLPEKEKLKMEVE	PALH(1)IEDLPEK(1)
P62081	126	0.797282	5.95712	62.442	H	KNKQKRPRSRTLTAVHDAILEDLVFPSEIVG	SR(0.202)TLTAVH(0.797)DAILEDLVFPSEIVGKR
P62995	200	0.997465	25.9596	93.839	H	DGRRIRVDFSITKRPHTPTPGIYMGRPTYGS	R(0.003)PH(0.997)TPTPGIYMGR
P68104	7	0.840008	6.12943	58.123	H	_________MGKEKTHINIVVIGHVDSGKST	MGK(0.784)EK(0.366)TH(0.84)INIVVIGHVDSGK(0.011)
P78312	969	0.975094	16.2424	65.244	H	NFQAATESVPNSGNIHNGSLEQTEEPETSSH	NFQAATESVPNSGNIH(0.975)NGSLEQTEEPETSSH(0.023)SPSR(0.002)
P84098	143	0.951643	12.9542	84.568	H	KGNVFKNKRILMEHIHKLKADKARKKLLADQ	R(1)ILMEHIH(0.952)K(0.048)
P85037	423	0.999844	38.0608	110.38	H	PFGPLSSRSAPASPTHPGLMSPRSGGLQTPE	SAPASPTH(1)PGLMSPR
P98082	425	0.999942	42.3554	111.3	H	NGVKQDLESSVQSSPHDSIAIIPPPQSTKPG	QDLESSVQSSPH(1)DSIAIIPPPQSTKPGR
Q00839	282	0.998898	29.6284	95.212	H	SRAKSPQPPVEEEDEHFDDTVVCLDTYNCDL	SPQPPVEEEDEH(0.999)FDDTVVCLDTYNCDLHFK(0.001)
Q01082	804	0.756738	5.86731	45.791	H	VAEEIANYRPTLDTLHEQASALPQEHAESPD	DVAEEIANYR(0.043)PTLDTLH(0.757)EQASALPQEH(0.196)AESPDVR(0.005)
Q01082	814	0.983139	18.3539	59.598	H	TLDTLHEQASALPQEHAESPDVRGRLSGIEE	HKDVAEEIANYRPTLDTLH(0.002)EQASALPQEH(0.983)AESPDVR(0.014)
Q01167	376	1	81.1194	143.84	H	PLGPLSSRSAPASPNHAGVLSAHSSGAQTPE	SAPASPNH(1)AGVLSAHSSGAQTPESLSR
Q01167	383	0.890873	9.91379	45.49	H	RSAPASPNHAGVLSAHSSGAQTPESLSREGS	SAPASPNH(0.16)AGVLSAH(0.891)SSGAQTPESLSR(0.863)EGSPAPLEPEPGAAQPK(0.086)
Q01196	215	0.900772	9.64209	145.31	H	ELEQLRRTAMRVSPHHPAPTPNPRASLNHST	TAMR(0.001)VSPH(0.098)H(0.901)PAPTPNPR
Q01581	485	0.982529	21.1407	88.186	H	PTPNDDTLDEGVGLVHSNIATEHIPSPAKKV	RPTPNDDTLDEGVGLVH(0.983)SNIATEH(0.003)IPSPAK(0.008)K(0.007)
Q01581	492	0.97568	16.2048	129.72	H	LDEGVGLVHSNIATEHIPSPAKKVPRLPATA	RPTPNDDTLDEGVGLVH(0.001)SNIATEH(0.976)IPSPAK(0.023)
Q01974	594	0.997104	25.4979	50.088	H	DDRTVKSALEPPDFVHLVAQIAAGMEYLSSH	SALEPPDFVH(0.997)LVAQIAAGMEYLSSHHVVHK(0.003)
Q02413	42	0.999984	48.7993	96.668	H	IQVRDYNTKNGTIKWHSIRRQKREWIKFAAA	NGTIK(1)WH(1)SIRR
Q02487	115	0.998735	28.9718	75.652	H	NTENQEKKKIFVFLEHQTKVLKKRHTKEKVL	K(0.002)IFVFLEH(0.999)QTK(1)
Q03188	606	0.794889	6.45021	52.198	H	VQKFLNAEGSGGIVGHDEISRCSLSEPLESD	FLNAEGSGGIVGH(0.795)DEISR(0.18)CSLSEPLESDEADLAK(0.025)
Q05209	584	0.999124	30.5725	69.084	H	TPSPTTQVETPDLVDHDNTSPLFRTPLSFTN	TVSLTPSPTTQVETPDLVDH(0.999)DNTSPLFR(0.001)
Q05682	253	0.773209	5.31518	98.421	H	PKQEEEREQGSDEISHHEKMEEEDKERAEAE	QEEER(1)EQGSDEISH(0.773)H(0.229)EK(0.998)
Q06418	865	0.999976	46.1992	86.825	H	ILTPGGLAEQPGQAEHQPESPLNETQRLLLL	YILTPGGLAEQPGQAEH(1)QPESPLNETQR
Q07157	279	0.940536	14.0097	54.647	H	ERATLLNVPDLSDSIHSANASERDDISEIQS	ATLLNVPDLSDSIH(0.941)SANASER(0.754)DDISEIQSLASDH(0.153)SGR(0.153)
Q07157	1110	0.999996	54.0359	114.58	H	DDKQPYPSRPPFDNQHSQDLDSRQHPEESSE	QPYPSRPPFDNQH(1)SQDLDSR
[truncated: 1,109 more rows]

## Sheet: cell nuclei-all sites
Proteins	Positions within proteins	Localization prob	Score diff	Score	Amino acid	Sequence window	Phosphorylation(HKR) Probabilities
[truncated: 1,554 more rows]

[truncated: 1 more sheets: cell nuclei-filtered sites]
