# Supplementary material for: Affinity peptide ligands: new tools for chasing non-canonical N-phosphoproteome
Source: Royal Society of Chemistry journal article supplement (doi:10.1039/d5sc01557j), 2025-01-01
Supplement: d5sc01557j2.xlsx [file d5sc01557j2.xlsx]

## Sheet: Info
Dataset S2: Quantified N-phosphorylation sites in AD mouse brain via MB@P1 based enrichment strategy.
Filtered sites: sites with localization probability ≥ 0.75, score ≥ 40, score difference ≥ 5.
Quantified sites: the N-phosphorylation sites quantified by two or more biological replicates in each group.

## Sheet: All sites
Proteins	Positions within proteins	Localization prob	Score diff	Score	Amino acid	Sequence window	Phosphorylation(HKR) Probabilities	Normalized-intensity AD_Cor_1___1	Normalized-intensity AD_Cor_1___2	Normalized-intensity AD_Cor_1___3	Normalized-intensity AD_Cor_2___1	Normalized-intensity AD_Cor_2___2	Normalized-intensity AD_Cor_2___3	Normalized-intensity AD_Cor_3___1	Normalized-intensity AD_Cor_3___2	Normalized-intensity AD_Cor_3___3	Normalized-intensity AD_Others_1___1	Normalized-intensity AD_Others_1___2	Normalized-intensity AD_Others_1___3	Normalized-intensity AD_Others_2___1	Normalized-intensity AD_Others_2___2	Normalized-intensity AD_Others_2___3	Normalized-intensity AD_Others_3___1	Normalized-intensity AD_Others_3___2	Normalized-intensity AD_Others_3___3	Normalized-intensity WT_Cor_1___1	Normalized-intensity WT_Cor_1___2	Normalized-intensity WT_Cor_1___3	Normalized-intensity WT_Cor_2___1	Normalized-intensity WT_Cor_2___2	Normalized-intensity WT_Cor_2___3	Normalized-intensity WT_Cor_3___1	Normalized-intensity WT_Cor_3___2	Normalized-intensity WT_Cor_3___3	Normalized-intensity WT_Others_1___1	Normalized-intensity WT_Others_1___2	Normalized-intensity WT_Others_1___3	Normalized-intensity WT_Others_2___1	Normalized-intensity WT_Others_2___2	Normalized-intensity WT_Others_2___3	Normalized-intensity WT_Others_3___1	Normalized-intensity WT_Others_3___2	Normalized-intensity WT_Others_3___3
A0A1W2P872	10	0.987149	18.9234	187.16	K	______MEPEAPDSRKRPLETPPEVVCTKRS	K(0.987)R(0.013)PLETPPEVVCTK	0	0	0	0	0	0	9.56261e+06	0	0	0	0	0	1.50596e+07	0	0	1.55412e+07	0	0	1.87925e+07	0	0	0	0	0	0	0	0	0	0	0	0	0	0	0	0	0
A2A5R2	215	0.990639	20.2458	185.58	K	QVLQEARELEKPMQSKPQSPVIQATAGSPKF	ELEK(0.009)PMQSK(0.991)PQSPVIQATAGSPK(1)	0	30029723	0	0	0	0	0	0	0	0	0	0	0	0	0	0	0	0	0	0	0	0	0	0	0	0	0	0	3.30901e+07	0	0	0	0	0	1.14171e+08	0
A2A5R2	241	0.983616	18.0788	161.56	K	GSPKFSRLKQSQAQSKPTTPEKAELPNGDHA	QSQAQSK(0.984)PTTPEK(0.001)AELPNGDHAQSGLGK(0.015)	0	0	0	1.89906e+07	0	0	1.33248e+07	0	0	0	0	0	1.80934e+07	0	0	2.71521e+07	0	0	0	0	0	0	0	0	1.12128e+07	0	0	1.61957e+07	0	0	1.17421e+07	0	0	2.43858e+07	0	0
A2A690	1582	0.940409	11.9814	228.32	K	RYQQETNVSQLPGRPKSPLSKMAQRPYQMPQ	YQQETNVSQLPGRPK(0.94)SPLSK(0.06)	0	0	0	8.85262e+06	0	0	4.43103e+06	0	0	0	0	0	6.20589e+06	0	0	4.98813e+06	0	0	0	0	0	0	0	0	3.44867e+06	0	0	4.85316e+06	0	0	0	0	0	0	0	0
A2AHC3	1059	0.989183	19.6396	86.987	K	VPTPGTKNNCQDQKIKAPVHFVEPLSPTGVP	IK(0.989)APVH(0.011)FVEPLSPTGVPGHR	9.37836e+06	0	0	1.08281e+07	0	0	0	0	0	0	0	0	1.69282e+07	0	0	6.7553e+06	0	0	0	0	0	0	0	0	0	0	0	0	0	0	0	0	0	6.03961e+06	0	0
A2AJI0	493	0.963184	14.2101	106.57	K	ASPCPSPGPGHALPPKPPSPRGTTASPKGRV	PASPCPSPGPGHALPPK(0.963)PPSPR(0.037)	0	0	0	6.80535e+06	0	0	4.45927e+06	0	0	6.0139e+06	0	0	3.96196e+06	0	0	8.07569e+06	0	0	2.73164e+06	0	0	4.60142e+06	0	0	0	0	0	2.57923e+06	0	0	5.42283e+06	0	0	8.16059e+06	0	0
A2AJI0	395	0.999998	56.7629	162.22	K	SAHRCTPSGERPERRKPGAGGSPALARRRLE	RK(1)PGAGGSPALAR	0	0	0	1.61492e+07	0	0	2843296	0	0	5.14965e+06	0	0	1.59686e+06	0	0	5.1763e+06	0	0	1.32018e+07	0	0	0	0	0	0	0	0	1.8393e+06	0	0	1.07776e+07	0	0	419367	0	0
A2ALS5	483	1	90.5702	197.19	K	PDLAKAAGISLIVPGKSPTRKKSGPFGSRRS	AAGISLIVPGK(1)SPTR	0	0	0	7.48279e+06	0	0	0	0	0	7.05658e+06	0	0	8.53427e+06	0	0	2.82653e+06	0	0	0	0	0	0	0	0	3.85487e+06	0	0	5.6943e+06	0	0	1.05288e+07	0	0	8.07855e+06	0	0
A2AP18	984	1	99.5047	188.96	K	VKQTLGLKGLFLRGTKPGSLDSHAAGQPLPR	GTK(1)PGSLDSHAAGQPLPR	1.78869e+08	0	0	2.31741e+08	0	0	1.72404e+08	0	0	1.35726e+08	0	0	7.85587e+07	0	0	1.05896e+08	0	0	1.15564e+08	0	0	1.56989e+08	0	0	2.68211e+08	0	0	3.29517e+07	0	0	1.45774e+08	0	0	5.91455e+07	0	0
A2ARZ3	1294	0.928452	12.2603	55.051	K	LIEKSLHSQLSTYTMKIVNIILHAIQSELEI	SLH(0.072)SQLSTYTMK(0.928)IVNIILH(0.15)AIQSELEINK(0.85)	0	2.91288e+07	0	0	5.75498e+07	0	0	5.67176e+07	0	0	6.23379e+07	0	0	0	0	0	0	0	0	0	0	0	4.68161e+07	0	0	0	0	0	0	0	0	0	0	0	0	0
A2RSJ4	417	0.999993	53.8904	161.49	K	MLKQAMKDRNLGSPPKSPTHASPQHTQTEKD	NLGSPPK(1)SPTHASPQHTQTEK	4.27621e+07	0	0	6.67549e+07	0	0	4.7945e+07	0	0	8.37949e+07	0	0	4.15306e+07	0	0	5.328e+07	0	0	5.89084e+07	0	0	5.27157e+07	0	0	3.83793e+07	0	0	3.66432e+07	0	0	0	0	0	5.05175e+07	0	0
B1AZP2	918	1	91.1698	177.36	K	YHLKANSWQLVETPEKRKEEKKPPPPVPKKP	ANSWQLVETPEK(1)R	0	0	0	8.19128e+06	0	0	5.52524e+06	0	0	0	0	0	3.68983e+06	0	0	0	0	0	0	0	0	0	0	0	0	0	0	0	0	0	0	0	0	0	0	0
B9EHT4	397	0.900473	9.56528	224.34	K	FSRVTGKGRREHKGKKKSPSSPSLGSLQQRE	K(0.9)K(0.1)SPSSPSLGSLQQR	5.98553e+07	0	0	4.42491e+07	0	0	5.02345e+07	0	0	5.15875e+07	0	0	4.2123e+07	0	0	6.12484e+07	0	0	4.63279e+07	0	0	6.04676e+07	0	0	4.43252e+07	0	0	6.47869e+07	0	0	5.61581e+07	0	0	4.43388e+07	0	0
B9EHT4	398	0.5	0	162.88	K	SRVTGKGRREHKGKKKSPSSPSLGSLQQREG	K(0.5)K(0.5)SPSSPSLGSLQQR	5.98553e+07	0	0	4.42491e+07	0	0	5.02345e+07	0	0	5.15875e+07	0	0	4.2123e+07	0	0	6.12484e+07	0	0	4.63279e+07	0	0	2.64269e+07	0	0	1.90004e+07	0	0	6.47869e+07	0	0	5.61581e+07	0	0	4.43388e+07	0	0
E9PUL5	96	0.992422	21.1715	62.345	K	TVQATDLSLNPEEGSKASPSPSPSEARQEPA	AELAPETTETPVETPETVQATDLSLNPEEGSK(0.992)ASPSPSPSEAR(0.008)	0	0	0	0	0	0	0	0	0	0	0	0	0	0	0	0	0	0	0	0	0	0	0	0	0	0	0	0	0	0	0	0	0	1.38842e+07	0	0
E9PUL5	213	0.999071	30.3143	109.17	K	GEEGPAPQPHSPPSTKTPPANGAPPRVLQKL	QENGAVVPLQAGDGEEGPAPQPH(1)SPPSTK(0.999)TPPANGAPPR(0.001)	1.14266e+07	8.81233e+06	0	0	0	0	0	8.29043e+06	0	0	0	0	8.61669e+06	0	0	0	9.22519e+06	0	1.50043e+07	0	0	1.42859e+07	0	0	0	1.15066e+07	0	0	0	0	0	0	0	9.58221e+06	0	0
E9PV86	944	0.841661	10.4838	83.411	K	VQYQELKPDHSHSPYKRKKNNLG________	VPSDVQVVQYQELK(0.005)PDH(0.075)SH(0.069)SPYK(0.842)R(0.009)	1.70289e+07	0	0	1.80865e+07	0	0	1.93689e+07	0	0	0	0	0	0	0	0	6.23117e+06	0	0	2.21325e+07	0	0	2.44428e+07	0	0	0	0	0	0	0	0	0	0	0	0	0	0
E9PVB3	136	0.986049	18.4931	130.56	K	IADARKLNIIEISQIKRKIETMNNEVKFLTN	LNIIEISQIK(0.986)R(0.014)	5.22899e+06	0	0	1.38438e+07	0	0	1.0372e+07	0	0	7.82613e+06	0	0	9.09158e+06	0	0	6.49139e+06	0	0	4.89508e+07	0	0	2.42714e+07	0	0	3.4588e+07	0	0	4.65765e+06	0	0	2.01483e+07	0	0	0	0	0
E9Q394	2314	0.774368	5.51369	62.67	K	NRDEDEGIPSENEEEKKLLDTKARELKEQLQ	NSWIQIIQDTINSLNR(0.008)DEDEGIPSENEEEK(0.774)K(0.218)	0	0	0	9.10938e+06	0	0	9.79887e+06	0	0	0	0	0	5.00274e+06	0	0	7.45931e+06	0	0	0	0	0	0	0	0	1.54366e+07	0	0	7.45973e+06	0	0	8.52243e+06	0	0	7.94467e+06	0	0
E9Q6P5	204	0.999997	54.6105	113.33	K	EIERVMLTNIQNRSPKPGPAPHDQELGFFLE	SPK(1)PGPAPHDQELGFFLETGLQR	7.89892e+07	0	0	8.68145e+07	0	0	6.46063e+07	0	0	6.99999e+07	0	0	7.34793e+07	0	0	8.30283e+07	0	0	1.48965e+08	0	0	1.29679e+08	0	0	1.34272e+08	0	0	1.34132e+08	0	0	1.93685e+08	0	0	1.23117e+08	0	0
E9Q8I9	1954	1	72.9712	73.936	K	SSPDLSSSSKLTASRKSTGQLNVNPGTPGSG	K(1)STGQLNVNPGTPGSGGGGGGSGNTTTAER	0	0	0	0	0	0	0	0	0	0	0	0	0	0	0	0	0	0	0	0	0	0	0	0	0	0	0	0	0	0	0	0	0	0	0	0
F6SEU4	1069	0.999998	57.515	212.87	K	GGGSGGGQPPPLQRGKSQQLTVSAAQKPRPS	GK(1)SQQLTVSAAQKPR	3.7027e+07	0	0	5.71491e+06	0	0	2.53475e+07	0	0	0	0	0	1.62803e+07	0	0	1.03558e+07	0	0	9.1259e+06	0	0	4.19306e+06	0	0	7.37173e+06	0	0	0	0	0	6.91729e+06	0	0	2.01078e+07	0	0
F6SEU4	1080	0.761179	5.03413	234.82	K	LQRGKSQQLTVSAAQKPRPSSGNLLQSPEPS	GK(0.239)SQQLTVSAAQK(0.761)PR	0	0	0	0	0	0	0	0	0	0	0	0	0	0	0	0	0	0	0	0	0	0	0	0	0	0	0	0	0	0	0	0	0	1.4624e+06	0	0
F6SEU4	994	0.378435	0.855621	53.553	K	FHGYSKSEDLSSGVPKPPAASILHSHSYSDE	SEDLSSGVPK(0.378)PPAASILH(0.311)SH(0.311)SYSDEFGPSGTDFTR	0	0	0	0	0	0	0	0	0	0	0	0	0	0	0	0	0	0	0	0	0	0	0	0	0	0	0	0	0	0	0	0	0	0	0	0
F8VPU2	432	0.999924	41.1765	127.37	K	ACTLELGPHQSPALPKSPPGSKAADGTTVVP	ACTLELGPHQSPALPK(1)SPPGSK(1)	6.89174e+07	0	0	6.63332e+07	0	0	3.26922e+07	3.44488e+06	0	1.56452e+07	0	0	3.68388e+07	0	0	0	0	0	0	0	0	6.91883e+07	7.15029e+06	0	7.11522e+07	9.51678e+06	0	2.08381e+07	0	0	0	0	0	5.82656e+07	0	0
G3X9K3	1557	0.81983	10.1164	96.197	K	TSGEAEPPSPSAVSEKPLDAISQKSVDIHDS	TTIPH(0.025)ALLTWR(0.075)PTSGEAEPPSPSAVSEK(0.82)PLDAISQK(0.08)	0	0	0	1.05184e+07	0	0	5.11266e+06	0	0	5.3673e+06	0	0	1.77107e+07	0	0	0	0	0	1.00473e+07	0	0	0	0	0	0	0	0	9.19968e+06	0	0	8.35113e+06	0	0	12635945	0	0
G5E829	19	1	81.1494	186.36	K	MANNSVAYSGVKNSLKEANHDGDFGITLTEL	NSLK(1)EANHDGDFGITLTELR	7.12252e+06	0	0	1.46872e+07	0	0	1.29872e+07	0	0	0	0	0	0	0	0	0	0	0	0	0	0	0	0	0	5.75817e+06	0	0	0	0	0	0	0	0	0	0	0
O08539	347	0.492597	0	100.11	K	SPSQLRKGPPVPPPPKHTPSKEMKQEQILSL	KGPPVPPPPK(0.493)H(0.493)TPSK(0.015)	0	0	0	0	0	0	0	0	0	0	0	0	0	0	0	0	0	0	0	0	0	0	0	0	0	0	0	0	0	0	0	0	0	0	0	0
O08582	585	0.996072	24.0414	197.7	K	ITKLLQTTNNSPMNSKPQQIKMQSTKKGPLS	LLQTTNNSPMNSK(0.996)PQQIK(0.004)	5.72618e+06	0	0	1.0839e+07	0	0	0	0	0	0	0	0	1.30499e+07	0	0	5.02051e+06	0	0	0	0	0	6.79772e+06	0	0	6.91322e+06	0	0	7.2687e+06	0	0	5.80632e+06	0	0	9.03817e+06	0	0
O08919	274	0.999981	47.1413	82.331	K	PGHVSPTPATTSPGEKGEAGTPVAAGTTAAA	AEAAAAPAVAPGPAQPGH(1)VSPTPATTSPGEK(1)GEAGTPVAAGTTAAAIPR	1.9994e+07	1.96245e+07	0	1.16139e+07	2.66505e+07	0	1.35364e+07	1.83442e+07	0	1.17189e+07	2.11591e+07	0	1.16015e+07	2.20509e+07	0	0	2.35047e+07	0	2.83955e+07	2.0431e+07	0	0	1.9932e+07	0	0	2.19712e+07	0	6.0474e+06	2.26455e+07	0	0	5.35551e+07	0	0	4.65722e+07	0
O09106	403	0.999782	36.6178	95.629	K	AIPEESGDEDEEDPDKRISICSSDKRIACEE	MLPHAPGVQMQAIPEDAIPEESGDEDEEDPDK(1)R	3.3482e+07	0	0	2.87745e+07	0	0	2.9928e+07	0	0	2.1366e+07	0	0	3.06031e+07	0	0	2.78237e+07	0	0	2.82775e+07	0	0	0	0	0	4.78143e+06	0	0	2.79967e+07	0	0	3.80586e+07	0	0	2.80617e+07	0	0
O35526	12	1	94.1748	127.01	K	____MKDRTQELRTAKDSDDDDDVTVTVDRD	TAK(1)DSDDDDDVTVTVDRDR	0	0	0	0	0	0	0	0	0	0	0	0	0	0	0	0	0	0	1.19763e+07	0	0	9.47335e+06	0	0	2.23675e+06	0	0	0	0	0	0	0	0	0	0	0
O35633	98	0.999996	56.2022	164.63	K	IHYQRGGAPLPPSGSKDQAVGAGGEFGGHDK	GGAPLPPSGSK(1)DQAVGAGGEFGGHDKPK	2.98616e+08	0	0	3.22158e+08	0	0	1.73694e+08	0	0	5.32386e+08	0	0	5.3443e+08	0	0	5.51856e+08	0	0	2.5881e+08	0	0	3.20226e+08	0	0	2.78004e+08	0	0	4.80423e+08	0	0	6.54022e+08	0	0	7.53668e+08	0	0
O35633	113	0.54655	1.07954	145.67	K	KDQAVGAGGEFGGHDKPKITAWEAGWNVTNA	GGAPLPPSGSK(0.027)DQAVGAGGEFGGHDK(0.547)PK(0.426)	0	0	0	0	0	0	0	0	0	0	0	0	0	0	0	0	0	0	0	0	0	0	0	0	0	0	0	0	0	0	0	0	0	0	0	0
O35633	64	1	69.7782	85.745	K	DLDFEHRQGLQMDILKSEGEPCGDEGAEAPV	QGLQMDILK(1)SEGEPCGDEGAEAPVEGDIHYQR	0	0	0	0	0	0	0	0	0	0	0	0	4.43792e+06	0	0	0	0	0	0	0	0	0	0	0	0	0	0	0	0	0	0	0	0	0	0	0
O35681	378	0.999997	55.1768	116.74	K	ETFQFSVPLAELAQRKLHFSVYDFDRFSRHD;EVFLFPVHYNDLEARKLHFSVYDFDRFSRHD	K(1)LHFSVYDFDR	8.08367e+06	0	0	0	0	0	0	0	0	8.27105e+06	0	0	8.60771e+06	0	0	8.42754e+06	0	0	1.16285e+07	0	0	0	0	0	1.16281e+07	0	0	2.09461e+07	0	0	1.85158e+07	0	0	1.65495e+07	0	0
O35926	82	0.976952	16.2724	183.31	K	KRLVAASAKKKKGSKKVTPKPASTGPDPLVQ	K(0.977)VTPK(0.023)PASTGPDPLVQQR	2.03891e+07	0	0	2.97502e+07	0	0	2.86416e+07	0	0	1.91474e+07	0	0	1.79604e+07	0	0	1.44619e+07	0	0	0	0	0	1.52422e+07	0	0	0	0	0	9.13292e+06	0	0	0	0	0	0	0	0
O35926	86	0.971416	15.3128	106.31	K	AASAKKKKGSKKVTPKPASTGPDPLVQQRNR	K(0.029)VTPK(0.971)PASTGPDPLVQQR	0	0	0	0	0	0	0	0	0	0	0	0	0	0	0	0	0	0	2.757e+07	0	0	0	0	0	3.11942e+07	0	0	0	0	0	1.94698e+07	0	0	0	0	0
O54774	789	0.999937	41.9978	72.292	K	TEEMPENALPSDEDDKDPNDPYRALDIDLDK	VDIITEEMPENALPSDEDDK(1)DPNDPYR	4.89325e+07	0	0	4.14404e+07	0	0	2.70766e+07	0	0	0	0	0	6.02613e+07	0	0	7.07198e+07	0	0	1.89769e+07	0	0	1.25723e+07	0	0	2.45505e+07	0	0	1.9694e+07	0	0	3.16565e+07	0	0	2.20696e+07	0	0
O54829	251	0.935167	11.8837	122.49	K	DIRSHSPTHTPTPETKPPTEDELHQQIKYWQ	SHSPTH(0.004)TPTPETK(0.935)PPTEDELHQQIK(0.061)	0	0	0	0	0	0	0	0	0	0	0	0	1.6827e+07	0	0	0	0	0	0	0	0	0	0	0	0	0	0	0	0	0	0	0	0	0	0	0
O55029	856	0.984559	20.4364	79.407	K	GFQPSRPTAQQEPDGKPASSPVIMASQTTHK	GFQPSR(0.009)PTAQQEPDGK(0.985)PASSPVIMASQTTHK(0.007)	5.74645e+07	0	0	3.01579e+07	0	0	1.15301e+07	0	0	1.09324e+07	0	0	2.88618e+07	0	0	5.51427e+07	0	0	8.4167e+06	0	0	0	0	0	0	0	0	0	0	0	0	0	0	0	0	0
O55106	131	0.99998	47.0025	135.47	K	YHKLKYGTELNQGDMKPPSYDSDEGNETEVQ	YGTELNQGDMK(1)PPSYDSDEGNETEVQPQQNSQLMWK	5.96207e+07	0	0	37481662	0	0	4.59268e+07	0	0	2.62548e+07	0	0	3.97371e+07	0	0	4.91928e+07	0	0	8.9086e+07	0	0	7.56397e+07	0	0	7.74138e+07	0	0	3.97055e+07	0	0	5.72126e+07	0	0	3.76447e+07	0	0
O70251	96	0.996162	27.0467	56.804	K	PSSVEDTTGSGAADAKDDDDIDLFGSDDEEE	YGPSSVEDTTGSGAADAK(0.996)DDDDIDLFGSDDEEESEEAK(0.002)K(0.002)	9.5133e+06	0	0	7.6577e+06	0	0	0	0	0	0	0	0	1.56953e+07	0	0	4.49128e+07	0	0	0	0	0	0	0	0	0	0	0	0	0	0	0	0	0	0	0	0
O88343	67	1	79.5064	143.72	K	KEKKEKERISENYSDKSDVENADESSSSILK	ISENYSDK(1)SDVENADESSSSILKPLISPAAER	4.53314e+07	4.502e+07	0	6.68351e+07	6.61379e+07	0	8.04375e+07	5.40659e+07	0	6.06396e+07	4.03726e+07	0	8.92512e+07	4.43253e+07	0	8.67097e+07	5.48649e+07	0	9.87707e+07	3.68536e+07	0	6.23294e+07	3.70983e+07	0	9.03694e+07	5.53934e+07	0	8.02007e+07	0	0	5.94038e+07	6.86002e+07	0	9.71299e+07	4.86462e+07	0
O88343	82	0.999993	51.2564	65.92	K	KSDVENADESSSSILKPLISPAAERIRFILG	ISENYSDK(1)SDVENADESSSSILK(1)PLISPAAER	0	4.502e+07	0	0	6.61379e+07	0	0	5.40659e+07	0	0	4.03726e+07	0	0	4.43253e+07	0	0	5.48649e+07	0	0	3.68536e+07	0	0	3.70983e+07	0	0	5.53934e+07	0	0	0	0	0	6.86002e+07	0	0	4.86462e+07	0
O88520	7	0.999982	47.39	168.26	K	_________MSSSLGKEKDSKEKDPKVPSAK	SSSLGK(1)EKDSK	0	0	0	0	0	0	0	0	0	0	0	0	0	0	0	0	0	0	0	0	0	0	0	0	0	0	0	0	0	0	0	0	0	0	0	0
O88705	556	0.999432	32.4517	100.86	K	DRLRRIGKKNSILQRKRSEPSPGSSGGVMEQ	K(0.999)R(0.001)SEPSPGSSGGVMEQHLVQHDR	0	0	0	1.9224e+07	0	0	1.29074e+07	0	0	3.00833e+07	0	0	2.51752e+07	0	0	2.18878e+07	0	0	1.49226e+07	0	0	9.84232e+06	0	0	0	0	0	0	0	0	2.2516e+07	0	0	0	0	0
O88737	3380	0.959322	13.7261	101.08	K	KRSKHRKQGMEQKISKFSPIEEAKDVESDLA	ISK(0.959)FSPIEEAK(0.041)DVESDLASYPPPTVSSSLTSR	1.89394e+08	0	0	1.57088e+08	0	0	1.40693e+08	0	0	0	0	0	121066066	0	0	5.20728e+07	0	0	433112765	0	0	2.90861e+08	0	0	2.75231e+08	0	0	7.68486e+07	0	0	5.10176e+07	0	0	0	0	0
O88737	3388	0.721665	4.13777	83.741	K	GMEQKISKFSPIEEAKDVESDLASYPPPTVS	ISK(0.278)FSPIEEAK(0.722)DVESDLASYPPPTVSSSLTSR	0	0	0	0	0	0	3.21034e+07	0	0	5.10612e+07	0	0	0	0	0	3.36866e+07	0	0	0	0	0	0	0	0	0	0	0	0	0	0	1.09534e+08	0	0	8.7882e+07	0	0
O88935	634	0.926598	11.0637	84.855	K	QQPRPSGPGPAGRPAKPQLAQKPSQDVPPPI	PAK(0.927)PQLAQK(0.073)PSQDVPPPITAAAGGPPHPQLNK(0.001)	0	0	0	0	0	0	0	0	0	0	0	0	0	0	0	7.3337e+06	0	0	0	0	0	0	0	0	0	0	0	0	0	0	0	0	0	0	0	0
O88935	640	0.944106	12.3295	87.991	K	GPGPAGRPAKPQLAQKPSQDVPPPITAAAGG	PAK(0.055)PQLAQK(0.944)PSQDVPPPITAAAGGPPHPQLNK(0.001)	5.32082e+06	0	0	1.32011e+07	0	0	8.76294e+06	0	0	1.51344e+07	0	0	1.57051e+07	0	0	2.35826e+07	0	0	0	0	0	0	0	0	0	0	0	0	0	0	0	0	0	2.42473e+07	0	0
O89084	202	0.852453	8.21043	117.62	K	RSNFSLLTNVPIPSNKRSPLGGPPSVCKATL	SNFSLLTNVPIPSNK(0.852)R(0.129)SPLGGPPSVCK(0.019)	0	0	0	0	0	0	6.83253e+06	0	0	0	0	0	0	0	0	0	0	0	0	0	0	0	0	0	0	0	0	0	0	0	0	0	0	0	0	0
P04370	145	1	176.885	182.92	K	GLDVMASQKRPSQRSKYLATASTMDHARHGF	SK(1)YLATASTMDHAR	1.09927e+08	0	0	9.41749e+07	0	0	4.50884e+07	0	0	1.5064e+08	0	0	3.23142e+08	0	0	2.10314e+08	0	0	0	0	0	0	0	0	0	0	0	7.61739e+07	0	0	8.86875e+07	0	0	1.82597e+08	0	0
P04370	205	1	131.297	261.17	K	KDSHTRTTHYGSLPQKSQHGRTQDENPVVHF	TTHYGSLPQK(1)SQHGR	1.32424e+08	0	0	126308237	0	0	8.68319e+07	0	0	4.86168e+08	0	0	6.09329e+08	0	0	3.48738e+08	0	0	1.66246e+08	0	0	1.18219e+08	0	0	9.93679e+07	0	0	3.15185e+08	0	0	1.78969e+08	0	0	2.85547e+08	0	0
P05064	230	0.991497	22.5686	64.962	K	KALSDHHVYLEGTLLKPNMVTPGHACTQKFS	ALSDHHVYLEGTLLK(0.991)PNMVTPGH(0.003)ACTQK(0.005)	0	0	0	0	0	0	0	0	0	0	0	0	0	0	0	0	0	0	0	0	0	0	0	0	6.84983e+06	0	0	0	0	0	0	0	0	0	0	0
P09405	412	1	134.517	144.17	K	LLAKNLSFNITEDELKEVFEDAMEIRLVSQD	NLSFNITEDELK(1)EVFEDAMEIR	1.7617e+07	0	0	2.6172e+07	0	0	2.67777e+07	0	0	1.18236e+07	0	0	1.37304e+07	0	0	1.40083e+07	0	0	5.01882e+07	0	0	4.15877e+07	0	0	2.12657e+07	0	0	2.28927e+07	0	0	2.23789e+07	0	0	1.87782e+07	0	0
P0C1Q2	160	0.999969	45.1107	80.813	K	AQEPLSSVRRRALLRKASSLPPTTAHILSAL	K(1)ASSLPPTTAHILSALLESR	0	0	0	0	0	0	0	0	0	0	0	0	4.92799e+06	0	0	4.00222e+06	0	0	0	0	0	0	0	0	0	0	0	0	0	0	0	0	0	0	0	0
P0DW27	2	0.999992	49.1228	70.145	K	______________MKDEVVVVTGLAAMEPL	K(1)DEVVVVTGLAAMEPLIVH(0.439)R(0.439)MIVER(0.121)	0	0	0	0	1.01994e+07	0	0	0	0	0	0	0	0	4.13054e+06	0	0	0	0	0	0	0	0	0	0	0	0	0	0	0	0	0	1.20996e+07	0	0	0	0
P10636-7	356	0.999998	57.7422	173.45	K	KIETHKLTFRENAKAKTDHGAEIVYKSPVVS	AK(1)TDHGAEIVYK(1)SPVVSGDTSPR(1)	0	8.67116e+07	3.77764e+06	0	0	4.58418e+06	0	1.4948e+08	0	0	9.08044e+07	0	0	7.69961e+07	0	0	9.71974e+07	0	0	0	0	0	0	0	0	0	0	0	2.01194e+07	0	0	1.44143e+07	0	0	1.6236e+07	0
P10636-7	366	1	121.319	293.08	K	ENAKAKTDHGAEIVYKSPVVSGDTSPRHLSN	TDHGAEIVYK(1)SPVVSGDTSPR	5.60294e+07	8.67116e+07	3.77764e+06	4.19243e+07	0	4.58418e+06	3.62792e+07	1.4948e+08	0	4.10509e+07	9.08044e+07	0	4.83587e+07	7.69961e+07	0	3.47119e+07	9.71974e+07	0	0	0	0	1.43696e+07	0	0	0	0	0	0	2.01194e+07	0	0	1.44143e+07	0	4.75636e+07	1.6236e+07	0
P10636-7	302	0.67382	3.31552	147.09	K	SKVTSKCGSLGNIHHKPGGGQVEVKSEKLDF	CGSLGNIH(0.011)H(0.001)K(0.674)PGGGQVEVK(0.314)	2.91571e+06	0	0	0	0	0	0	0	0	0	0	0	0	0	0	0	0	0	0	0	0	0	0	0	0	0	0	0	0	0	0	0	0	0	0	0
P10636-7	145	1	85.9835	187.04	K	PPGQKGQANATRIPAKTPPAPKTPPSSGEPP	IPAK(1)TPPAPK(0.999)TPPSSGEPPK(0.001)	0	4.13795e+07	0	0	0	0	0	2.42095e+07	0	0	7.41529e+06	0	0	5.98745e+06	0	0	0	0	0	0	0	0	0	0	0	0	0	0	0	0	0	0	0	0	0	0
P10636-7	151	0.999998	57.7296	212.92	K	QANATRIPAKTPPAPKTPPSSGEPPKSGDRS	TPPAPK(1)TPPSSGEPPKSGDR	3.36322e+07	2.90008e+06	0	3.50044e+07	0	0	2.66123e+07	0	0	1.43273e+07	0	0	1.95687e+07	0	0	1.56721e+07	0	0	0	0	0	0	0	0	0	0	0	0	0	0	0	0	0	0	0	0
P10636-7	292	0.999989	51.1436	95.307	K	VQIVYKPVDLSKVTSKCGSLGNIHHKPGGGQ	VTSK(1)CGSLGNIHHKPGGGQVEVK	2.63083e+07	0	0	2.14959e+07	0	0	2.28754e+07	0	0	3.16364e+07	0	0	3.365e+07	0	0	2.66165e+07	0	0	0	0	0	2.92944e+06	0	0	2.89538e+06	0	0	4.38529e+06	0	0	5.83953e+06	0	0	4.11063e+06	0	0
P11881	1771	0.975304	16.2466	79.867	K	LTSFGNGPLSPGGPSKPGGGGGGPGSSSTSR	R(0.023)ESLTSFGNGPLSPGGPSK(0.975)PGGGGGGPGSSSTSR(0.002)	0	0	0	224661226	0	0	8.34335e+07	0	0	0	0	0	0	0	0	0	0	0	0	0	0	3.3945e+08	0	0	1.56344e+07	0	0	0	0	0	0	0	0	0	0	0
P13595	775	0.932608	11.4109	186.29	K	KDMEEGKAAFSKDESKEPIVEVRTEEERTPN	AAFSK(0.067)DESK(0.933)EPIVEVR	0	0	0	8.60987e+06	0	0	8.34782e+06	0	0	0	0	0	5.7385e+06	0	0	1.5851e+07	0	0	0	0	0	0	0	0	0	0	0	0	0	0	0	0	0	0	0	0
P14873	1491	1	89.3273	241.92	K	VETMSSQSALALDERKLGGDVSPTQIDVSQF	K(1)LGGDVSPTQIDVSQFGSFKEDTK	7.6588e+07	0	0	1.12257e+08	0	0	8.04076e+07	0	0	1.21765e+08	0	0	172521388	0	0	2.7334e+07	0	0	1.32931e+08	0	0	6.74509e+07	0	0	6.0738e+07	0	0	1.64322e+08	0	0	1.35035e+08	0	0	1.79115e+08	0	0
P14873	1250	1	207.809	207.81	K	ELDIKDVSDERLSPAKSPSLSPSPPSPIEKT	LSPAK(1)SPSLSPSPPSPIEK(1)	0	0	0	0	0	0	0	0	0	0	0	0	0	5.84539e+06	0	0	0	0	0	0	0	0	0	0	0	0	0	0	1.29132e+07	0	0	1.40896e+07	0	0	1.2102e+07	0
P14873	2269	0.578591	1.42602	148.85	K	VKKGDGKSKPLAASPKPGALKESSDKVSRVA	SK(0.417)PLAASPK(0.579)PGALK(0.005)	0	0	0	1.39169e+08	0	0	5.3545e+07	0	0	0	0	0	8.40127e+07	0	0	2.80585e+07	0	0	3.40299e+07	0	0	4.59231e+07	0	0	3.87501e+07	0	0	7.31912e+07	0	0	0	0	0	7.8758e+07	0	0
P14873	835	0.999898	38.4242	98.121	K	LEAERSLMSSPEDLTKDFEELKAEEIDVAKD	SLMSSPEDLTK(1)DFEELK(0.711)AEEIDVAK(0.289)	0	1.7615e+07	0	4.89726e+07	1.67358e+07	0	4.55251e+07	1.28642e+07	0	6.39718e+07	2.05306e+07	0	5.9908e+07	1.71958e+07	0	7.64918e+07	1.8668e+07	0	1.1999e+08	2.39707e+07	0	7.88937e+07	3.33095e+07	0	9.82542e+07	3.70168e+07	0	1.471e+08	2.61552e+07	0	8.42933e+07	2.82738e+07	0	7.57259e+07	2.31352e+07	0
P14873	1194	0.997502	28.8653	105.08	K	FNGLSEGSKTDATDGKDYNASASTISPPSSM	TDATDGK(0.998)DYNASASTISPPSSMEEDK(0.001)FSK(0.001)	1.16674e+07	0	0	1.55804e+07	0	0	2.16562e+07	0	0	0	0	0	3.14264e+07	0	0	1.51565e+07	0	0	1.25964e+07	0	0	1.10743e+07	0	0	9.9587e+06	0	0	1.6239e+07	0	0	1.92129e+07	0	0	1.73945e+07	0	0
P14873	1213	0.555256	0.968981	129.6	K	ASASTISPPSSMEEDKFSKSALRDAYCSEEK	TDATDGK(0.001)DYNASASTISPPSSMEEDK(0.555)FSK(0.444)	0	0	0	0	0	0	0	0	0	0	0	0	0	0	0	0	0	0	0	0	0	0	0	0	0	0	0	2.74726e+07	0	0	0	0	0	0	0	0
P14873	1910	0.99996	43.9742	160.18	K	HDVGGYYYEKTERTIKSPCDSGYSYETIEKT	TIK(1)SPCDSGYSYETIEK	0	0	0	1.32587e+07	0	0	7.20419e+06	0	0	1.70962e+07	0	0	9.40084e+06	0	0	1.69642e+07	0	0	0	0	0	0	0	0	0	0	0	7.66071e+06	0	0	0	0	0	8.61021e+06	0	0
P14873	1870	0.999893	39.7062	154.71	K	DSGGKTPGDFNYAYQKPENAAGSPDEEDYDY	TPGDFNYAYQK(1)PENAAGSPDEEDYDYESQEK	2.1106e+08	0	0	2.49037e+08	0	0	1.86833e+08	0	0	2.76577e+08	0	0	8.74153e+06	0	0	2.7295e+08	0	0	1.57617e+08	0	0	2.24429e+07	0	0	3.404e+08	0	0	3.86587e+08	0	0	3.68685e+08	0	0	8.79207e+07	0	0
P15105	11	0.615875	2.0502	102.07	K	_____MATSASSHLNKGIKQMYMSLPQGEKV	ATSASSH(0.384)LNK(0.616)GIK	1.61936e+07	0	0	1.70128e+07	0	0	3.04944e+07	0	0	5.91405e+07	0	0	1.90603e+07	0	0	0	0	0	2.82049e+07	0	0	2.90709e+07	0	0	2.36856e+07	0	0	4.37961e+07	0	0	1.23342e+07	0	0	1.55318e+07	0	0
P16054	726	1	103.137	113.53	K	LVDEAIIKQINQEEFKGFSYFGEDLMP____	QINQEEFK(1)GFSYFGEDLMP	1.29026e+07	0	0	0	0	0	1.99763e+07	0	0	1.96814e+07	0	0	1.63578e+07	0	0	1.27311e+07	0	0	0	0	0	4.06958e+07	0	0	0	0	0	3.85351e+07	0	0	1.35161e+07	0	0	1.80949e+07	0	0
P16546	1023	0.740913	4.56333	85.407	K	EVNDRQGFVPAAYVKKLDPAQSASRENLLEE	K(0.741)LDPAQSASR(0.259)ENLLEEQGSIALR	0	0	0	0	0	0	0	0	0	0	0	0	0	0	0	0	0	0	0	0	0	0	0	0	0	0	0	0	0	0	0	0	0	9.10008e+07	0	0
P18155	286	1	89.2595	89.26	K	VIDVGINRVQDPVTAKPKLVGDVDFEGVKKK	VQDPVTAK(1)PK(1)LVGDVDFEGVK(1)	0	0	0	0	0	0	0	0	0	0	0	0	0	0	0	0	0	0	0	0	0	0	0	0	0	0	0	0	0	0	0	0	0	0	0	0
P18155	288	1	89.2595	89.26	K	DVGINRVQDPVTAKPKLVGDVDFEGVKKKAG	VQDPVTAK(1)PK(1)LVGDVDFEGVK(1)	0	0	0	0	0	0	0	0	0	0	0	0	0	0	0	0	0	0	0	0	0	0	0	0	0	0	0	0	0	0	0	0	0	0	0	0
P18872	317	0.452745	0	66.593	K	AYIQTQFESKNRSPNKEIYCHMTCATDTNNI	NR(0.095)SPNK(0.453)EIYCH(0.453)MTCATDTNNIQVVFDAVTDIIIANNLR	0	0	0	0	0	0	0	0	0	0	0	0	0	0	0	0	0	0	0	0	0	0	0	0	0	0	0	0	0	0	0	0	0	0	0	0
P19246	828	0.998279	28.6358	225.86	K	AKSPVKEGAKPPEKAKPLDVKSPEAQTPVQE	AK(0.998)PLDVK(0.001)SPEAQTPVQEEAK	0	0	0	0	0	0	0	0	0	0	0	0	0	0	0	0	0	0	0	0	0	0	0	0	0	0	0	0	0	0	5.48167e+07	0	0	0	0	0
P19246	833	0.999948	42.8234	259.34	K	KEGAKPPEKAKPLDVKSPEAQTPVQEEAKHP	AKPLDVK(1)SPEAQTPVQEEAK	4.74807e+07	0	0	5.61564e+07	0	0	2.82951e+07	0	0	1.39169e+08	0	0	1.38234e+08	0	0	1.1538e+08	0	0	1.69645e+07	0	0	0	0	0	3.32551e+07	0	0	8.8389e+07	0	0	2.02928e+08	0	0	3.94873e+07	0	0
P19246	858	0.99307	21.5887	103.83	K	EEAKHPTDIRPPEQVKSPAKEKAKSPEKEEA	HPTDIRPPEQVK(0.993)SPAK(0.007)	8.43035e+07	0	0	1.5687e+08	0	0	8.6981e+07	0	0	3.20185e+08	0	0	2.70512e+08	0	0	3.38565e+08	0	0	5.94077e+07	0	0	6.20295e+07	0	0	1.11707e+07	0	0	2.46305e+08	0	0	4.45791e+08	0	0	3.39726e+08	0	0
P20357	1653	1	63.6283	253.97	K	LVPSEKKVAIIRTPPKSPATPKQLRLINQPL	VAIIRTPPK(1)SPATPK	2.25287e+08	0	0	3.42613e+08	0	0	3.03438e+08	0	0	1.4821e+08	0	0	1.83455e+08	0	0	1.84722e+08	0	0	3.30263e+07	0	0	177537611	0	0	184500540	0	0	4.30909e+07	0	0	1.00537e+08	0	0	1.20826e+08	0	0
P20357	905	0.999998	56.0974	67.917	K	NLSGESGSFYEGTDDKVRRDLATDLSLIEVK	YTVPLPSPVQDSENLSGESGSFYEGTDDK(1)VR	0	0	0	2.05918e+07	0	0	0	0	0	0	0	0	9.2817e+06	0	0	1.145e+07	0	0	0	0	0	0	0	0	1.42583e+07	0	0	1.16136e+07	0	0	0	0	0	1.64202e+07	0	0
P20444	105	0.487552	0	78.758	K	DKGPDTDDPRSKHKFKIHTYGSPTFCDHCGS	FK(0.488)IH(0.488)TYGSPTFCDH(0.025)CGSLLYGLIHQGMK	0	0	0	0	0	0	0	0	0	0	0	0	0	0	0	0	0	0	0	0	0	0	0	0	0	0	0	0	0	0	0	0	0	0	0	0
P20917	540	0.999976	46.1292	127.44	K	ILIAIVCYITQTRRKKNVTESSSFSGGDNPH	K(1)NVTESSSFSGGDNPHVLYSPEFR	0	0	0	7.19951e+06	0	0	0	0	0	2.0874e+07	0	0	1.83684e+07	0	0	1.74099e+07	0	0	0	0	0	0	0	0	0	0	0	2.43017e+07	0	0	0	0	0	2.33434e+07	0	0
P22682	663	1	89.4107	110.15	K	NSSPVAGPESEHPKIKPSSSANAIYSLAARP	IK(1)PSSSANAIYSLAAR	2.80168e+06	0	0	4.8309e+06	0	0	0	0	0	6.8403e+06	0	0	5.01294e+06	0	0	5.51327e+06	0	0	0	0	0	0	0	0	3.05911e+06	0	0	3.27372e+06	0	0	2.73972e+06	0	0	4.00407e+06	0	0
P26339	302	0.551273	0.89687	79.59	K	GDGKTEASEALPSEGKGELEHSQQEEDGEEA	TEASEALPSEGK(0.551)GELEH(0.448)SQQEEDGEEAMVGTPQGLFPQGGK	0	0	0	0	0	0	0	0	0	0	0	0	9.35433e+06	0	0	0	0	0	0	0	0	0	0	0	0	0	0	0	0	0	0	0	0	0	0	0
P26645	165	0.679388	3.26137	148.94	K	RFSFKKSFKLSGFSFKKSKKESGEGAEAEGA	LSGFSFK(0.679)K(0.321)	1.75375e+08	0	0	2.10944e+08	0	0	2.44517e+08	0	0	2.03546e+08	0	0	3.56654e+08	0	0	3.11703e+08	0	0	3.61331e+08	0	0	0	0	0	304726530	0	0	1.73753e+08	0	0	3.28392e+08	0	0	2.66773e+08	0	0
P27546	670	0.698652	3.66563	120.52	K	DITTPPNKEPPPSPEKKAKPLATTQPAKTST	AAVGVTGNDITTPPNK(0.001)EPPPSPEK(0.699)K(0.3)	1.80827e+07	0	0	0	0	0	2.11904e+07	0	0	44507561	0	0	3.95176e+07	0	0	4.891e+07	0	0	3.2329e+07	0	0	3.75556e+07	0	0	3.15917e+07	0	0	6.16351e+07	0	0	3.23827e+07	0	0	3.68329e+07	0	0
P27546	763	0.999981	49.8487	104.94	K	PITEAKVAEKRTSPSKPSSAPALKPGPKTTP	TSPSK(1)PSSAPALKPGPK	1.37662e+08	0	0	2.29641e+08	0	0	1.54853e+08	0	0	375838955	0	0	3.81525e+08	0	0	1.90538e+08	0	0	8.60223e+07	0	0	1.62207e+08	0	0	2.28912e+08	0	0	294177977	0	0	3.99265e+08	0	0	3.80487e+08	0	0
P27671	724	1	94.387	118.51	K	KLLYGDAPKSPRASRKFSSPPPLAIGTSSPS	K(1)FSSPPPLAIGTSSPSR	0	0	0	0	0	0	0	0	0	0	0	0	0	0	0	4.05988e+06	0	0	0	0	0	0	0	0	0	0	0	0	0	0	0	0	0	3.97698e+06	0	0
P28028	134	0.997097	25.359	129.88	K	SLVFQTPTDASRNNPKSPQKPIVRVFLPNKQ	NNPK(0.997)SPQK(0.003)PIVR	8.23037e+07	0	0	1.04461e+08	0	0	8.86504e+07	0	0	1.30119e+08	0	0	1.27961e+08	0	0	4.68075e+06	0	0	0	0	0	4.29074e+07	0	0	114402775	0	0	1.51212e+07	0	0	0	0	0	1.2458e+06	0	0
P28028	138	0.996508	24.5536	190.66	K	QTPTDASRNNPKSPQKPIVRVFLPNKQRTVV	NNPK(0.003)SPQK(0.997)PIVR	1.8125e+07	0	0	1.67467e+07	0	0	0	0	0	1.96316e+07	0	0	1.4987e+07	0	0	1.64436e+07	0	0	0	0	0	0	0	0	0	0	0	0	0	0	2.75231e+07	0	0	0	0	0
P28652	392	0.997724	26.4173	64.856	K	LEPQTTVIHNPVDGIKESSDSTNTTIEDEDA	GSLPPAALEPQTTVIH(1)NPVDGIK(0.998)ESSDSTNTTIEDEDAK(0.002)	0	0	0	0	1.22037e+07	0	0	2.12224e+07	0	0	0	0	0	0	0	0	0	0	0	0	0	0	1.59847e+07	0	0	5.74188e+07	0	0	0	0	0	0	0	0	0	0
P28661	332	0.976983	16.2784	159.26	K	IYQFPDCDSDEDEDFKLQDQALKESIPFAVI	IYQFPDCDSDEDEDFK(0.977)LQDQALK(0.023)	2.34047e+07	0	0	6.14774e+08	0	0	449974267	0	0	2.96729e+07	0	0	1099851388	0	0	1141006721	0	0	552813221	0	0	5.92113e+07	0	0	7.43808e+08	0	0	1096376315	0	0	1178601889	0	0	6.42964e+07	0	0
P28661	122	1	121.063	142.95	K	SPWGKLDPYDSSEDDKEYVGFATLPNQVHRK	LDPYDSSEDDK(1)EYVGFATLPNQVHR	532856838	0	0	3.33541e+08	0	0	4.53991e+08	0	0	7.59689e+08	0	0	1079696829	0	0	8.08898e+08	0	0	3.97165e+08	0	0	4.80215e+08	0	0	4.23714e+08	0	0	1221012954	0	0	8.82704e+08	0	0	9.8283e+08	0	0
P28867	639	0.995418	23.3693	255.39	K	SPSDYSNFDPEFLNEKPQLSFSDKNLIDSMD	SPSDYSNFDPEFLNEK(0.995)PQLSFSDK(0.005)	2.65387e+07	0	0	2.16686e+07	0	0	1.80364e+07	0	0	3.34841e+07	0	0	2.86358e+07	0	0	4.28412e+07	0	0	0	0	0	0	0	0	0	0	0	8.85382e+07	0	0	0	0	0	7.21746e+07	0	0
P35436	880	0.93646	11.7244	241.68	K	RGIYSCIHGVHIEEKKKSPDFNLTGSQSNML	K(0.936)K(0.063)SPDFNLTGSQSNMLK(0.001)	0	0	0	9.57232e+07	0	0	39509972	0	0	1.86623e+07	0	0	7.01958e+07	0	0	0	0	0	4.19445e+07	0	0	7.3427e+07	0	0	5.65545e+07	0	0	2.30993e+07	0	0	1.92278e+07	0	0	0	0	0
P35436	881	0.499995	0	134.82	K	GIYSCIHGVHIEEKKKSPDFNLTGSQSNMLK	K(0.5)K(0.5)SPDFNLTGSQSNMLK	0	0	0	8.45037e+07	0	0	0	0	0	0	0	0	7.4669e+07	0	0	6.89651e+07	0	0	0	0	0	0	0	0	9.68206e+07	0	0	0	0	0	0	0	0	0	0	0
P35585	14	0.493992	0	65.563	K	__MSASAVYVLDLKGKVLICRNYRGDVDMSE	MSASAVYVLDLK(0.012)GK(0.494)VLICR(0.494)	0	0	0	0	0	0	0	0	0	0	0	0	0	0	0	0	0	0	0	0	0	0	0	0	0	0	0	0	0	0	0	0	0	0	0	0
P39447	1369	0.837129	8.48461	85.441	K	YRKQLSYFDRRSFESKPSAHLPAGHHSEPAK	SFESK(0.837)PSAH(0.119)LPAGH(0.024)H(0.02)SEPAKPVHSQSQPNFSSYSSK	0	0	0	5.27656e+06	0	0	0	0	0	0	0	0	8.55059e+06	0	0	6.94387e+06	0	0	0	0	0	0	0	0	0	0	0	0	0	0	0	0	0	0	0	0
P40124	303	0.979967	16.9025	178.99	K	QSGPVRSGPKPFSAPKPQTSPSPKPATKKEP	SGPKPFSAPK(0.98)PQTSPSPK(0.02)	0	0	0	0	0	0	6.36978e+06	0	0	4.29939e+06	0	0	0	0	0	0	0	0	0	0	0	0	0	0	0	0	0	0	0	0	0	0	0	0	0	0
P42208	225	1	64.3307	184.21	K	IYHLPDAESDEDEDFKEQTRLLKASIPFSVV	IYHLPDAESDEDEDFK(1)EQTR	4.73375e+07	0	0	4.08825e+07	0	0	3.17144e+07	0	0	3.64523e+07	0	0	8.46655e+07	0	0	9.79789e+07	0	0	1.72266e+07	0	0	1.33017e+07	0	0	2.02225e+07	0	0	2.02437e+07	0	0	0	0	0	1.88053e+07	0	0
P43006	525	0.755759	6.29676	113.02	K	QEDIEMTKTQSIYDDKNHRESNSNQCVYAAH	TQSIYDDK(0.756)NH(0.177)R(0.066)ESNSNQCVYAAHNSVVIDECK	0	0	0	0	0	0	1.1782e+08	0	0	0	0	0	0	0	0	4.13483e+07	0	0	1.20943e+08	0	0	1.10613e+07	0	0	0	0	0	0	0	0	0	0	0	0	0	0
P46460	202	0.999906	40.2515	199.65	K	KAENSSLNLIGKAKTKENRQSIINPDWNFEK	TK(1)ENRQSIINPDWNFEK	3.58409e+06	0	0	0	0	0	0	0	0	0	0	0	5.41301e+06	0	0	2.80885e+06	0	0	0	0	0	0	0	0	0	0	0	0	0	0	0	0	0	5.29459e+06	0	0
P46660	438	0.992621	21.288	124.2	K	PSYLLPPRILSSTASKVSSAGLSLKKEEEEE	ILSSTASK(0.993)VSSAGLSLK(0.007)	1.15429e+07	0	0	0	0	0	6.81285e+06	0	0	4.63226e+07	0	0	0	0	0	3.46949e+07	0	0	1.54167e+07	0	0	1.38801e+07	0	0	2.83797e+07	0	0	2.97871e+07	0	0	2.9741e+07	0	0	2.70441e+07	0	0
P47809	86	0.999977	46.4294	205	K	IERLRTHSIESSGKLKISPEQHWDFTAEDLK	LK(1)ISPEQHWDFTAEDLKDLGEIGR	2.13468e+08	0	0	2.10018e+08	0	0	2.08394e+08	0	0	2.83764e+08	0	0	3.40938e+08	0	0	3.38774e+08	0	0	4.64805e+07	0	0	2.73816e+07	0	0	410592934	0	0	6.76525e+08	0	0	3.39072e+08	0	0	1.04002e+08	0	0
P47857	656	1	84.2995	169.64	K	FNLYSEEGKGIFDSRKNVLGHMQQGGSPTPF	K(1)NVLGHMQQGGSPTPFDR	1.94875e+07	0	0	2.00098e+07	0	0	1.80401e+07	0	0	2.30274e+07	0	0	1.8184e+07	0	0	1.82893e+07	0	0	2.61108e+07	0	0	0	0	0	2.77399e+07	0	0	2.06471e+07	0	0	2.88562e+07	0	0	0	0	0
P47867	364	0.999966	47.4157	122.94	K	NTTDSKSKLFPAPPEKSQEETDSTKEEAAKM	LFPAPPEK(1)SQEETDSTKEEAAK	0	0	0	0	0	0	0	0	0	0	0	0	0	0	0	0	0	0	0	0	0	0	0	0	0	0	0	0	0	0	0	0	0	0	0	0
P48722	578	1	108.132	123.67	K	DKQDRINQTIKKGKIKSIDLPIQSSLYRQLT	IK(1)SIDLPIQSSLYR	7.08169e+06	0	0	8.4496e+06	0	0	7.25286e+06	0	0	6.53361e+06	0	0	3.12502e+06	0	0	1.04647e+07	0	0	9.73013e+06	0	0	1.12299e+07	0	0	9.40126e+06	0	0	5.64679e+06	0	0	7.99289e+06	0	0	5.25636e+06	0	0
P51125	213	0.999366	34.697	116.85	K	VATALDKVVGKKKEQKPFTPASPVQSTPSKP	EQK(0.999)PFTPASPVQSTPSKPSDK	4.71077e+07	0	0	3.79796e+07	0	0	3.14118e+07	0	0	4.52571e+07	0	0	4.28696e+07	0	0	5.88721e+07	0	0	0	0	0	0	0	0	2.15998e+07	0	0	3.37449e+07	0	0	0	0	0	0	0	0
P51125	227	0.684419	3.64449	169.49	K	QKPFTPASPVQSTPSKPSDKSGMDAALDDLI	EQK(0.02)PFTPASPVQSTPSK(0.684)PSDK(0.296)	0	0	0	0	0	0	0	0	0	0	0	0	0	0	0	1.06416e+07	0	0	0	0	0	0	0	0	0	0	0	5.04739e+06	0	0	0	0	0	6.77627e+06	0	0
P52800	261	0.984163	18.3353	219.68	K	ITLVVLLLKYRRRHRKHSPQHTTTLSLSTLA	K(0.984)H(0.014)SPQHTTTLSLSTLATPK(0.001)	3.01965e+07	0	0	4.86217e+07	0	0	3.89622e+07	0	0	5.8087e+06	0	0	6.31254e+06	0	0	0	0	0	0	0	0	1.83417e+07	0	0	1.58548e+07	0	0	0	0	0	7.83873e+06	0	0	0	0	0
P54987	18	0.506213	0	60.735	K	LKSVTESFAGMIHGLKVNHLTDGIIRRSKRM	MLKSVTESFAGMIH(0.506)GLK(0.506)VNH(0.993)LTDGIIR(0.995)	0	0	0	0	0	0	0	0	0	0	0	0	0	0	0	0	0	0	0	0	0	0	0	0	0	0	0	0	0	0	0	0	0	0	0	0
P55012	936	0.984742	18.1138	123.44	K	ISHLQGQEELLSSQEKSPGTKDVVVNVDYSK	LKEGLDISHLQGQEELLSSQEK(0.985)SPGTK(0.015)	0	0	0	0	0	0	4.12532e+07	0	0	4.63467e+07	0	0	5.95008e+07	0	0	6.89591e+07	0	0	0	0	0	0	0	0	8.1916e+07	0	0	1.15042e+08	0	0	6.80945e+07	0	0	9.37558e+07	0	0
P55088	295	0.994988	23.944	68.192	K	VEDNRSQVETEDLILKPGVVHVIDIDRGEEK	SQVETEDLILK(0.995)PGVVH(0.001)VIDIDRGEEK(0.004)	1.79437e+07	0	0	1.71622e+07	0	0	0	0	0	2.17026e+07	0	0	1.32865e+07	0	0	2.92876e+07	0	0	3.9127e+07	0	0	1.7777e+07	0	0	0	0	0	0	0	0	0	0	0	3.06798e+07	0	0
P55821	59	0.999645	34.4929	98.175	K	QINKRASGQAFELILKPPSPISEAPRTLASP	ASGQAFELILK(1)PPSPISEAPR	0	0	0	0	0	0	0	0	0	0	0	0	0	0	0	0	0	0	0	0	0	0	0	0	0	0	0	0	0	0	0	0	0	5.19925e+06	0	0
P58871	542	0.999996	54.1017	86.079	K	SQVGPGTPPAPESPRKPISGVQGNDPGISLP	GEGVSQVGPGTPPAPESPR(1)K(1)PISGVQGNDPGISLPQR	0	2.38607e+07	0	0	5.13924e+07	0	0	2.38518e+07	0	0	1.4481e+07	0	7.3804e+06	9.63339e+06	0	7.40645e+06	1.32388e+07	0	0	0	0	9.74725e+06	0	0	6.8285e+06	3.69931e+07	0	0	8.92342e+06	0	0	1.96121e+07	0	8.43377e+06	1.63862e+07	0
P59017	341	1	117.537	121.94	K	TQVPTVEAPEMMRAEKTSPTPSVFVELGEEE	AEK(1)TSPTPSVFVELGEEELEAVTARPEAVER	4.50622e+07	0	0	5.5646e+07	0	0	4.2266e+07	0	0	4.97372e+07	0	0	5.30318e+07	0	0	6.63259e+07	0	0	7.14186e+07	0	0	4.53187e+07	0	0	8.84323e+07	0	0	8.6081e+07	0	0	8.19622e+07	0	0	5.55732e+07	0	0
P59242	652	1	73.8411	73.841	K	QNQEVTGRHRNQVLEKQLAALREEADRGREL	H(1)R(1)NQVLEK(1)QLAALR(1)	0	0	0	0	0	0	0	0	0	0	0	0	0	0	0	0	0	0	0	0	0	0	0	0	0	0	0	0	0	0	0	0	0	0	0	5.88088e+06
P59759	836	0.992274	22.8011	52.577	K	TAPLAPLQNGPSLASKPSSPPPPQQFVVQHS	TAPLAPLQNGPSLASK(0.992)PSSPPPPQQFVVQH(0.003)SLFATPITK(0.005)	3.00283e+07	0	0	5.3087e+07	0	0	3.08327e+07	0	0	1.07092e+07	0	0	0	0	0	1.23894e+07	0	0	66000351	0	0	0	0	0	4.95945e+07	0	0	0	0	0	1.36919e+07	0	0	0	0	0
P61022	182	1	68.6819	86.772	K	GDSAISFTEFVKVLEKVDVEQKMSIRFLH__	VLEK(1)VDVEQK(0.43)MSIR(0.57)	0	0	0	0	2.44595e+07	0	0	3.10601e+07	0	0	8.05863e+07	0	0	3.00368e+07	0	0	3.4498e+07	0	0	3.15341e+07	0	0	2.11351e+07	0	0	0	0	0	3.1304e+07	0	0	6.32885e+07	0	0	6.1043e+07	0
P61264	12	1	160.722	257.48	K	____MKDRTQELRSAKDSDDEEEVVHVDRDH	SAK(1)DSDDEEEVVHVDR	7.24569e+08	1.82025e+07	0	6.19341e+08	1.28891e+07	0	797592561	0	0	1354510749	1.56212e+07	0	1178511284	1.46165e+07	0	1668040303	2.83293e+07	0	245102825	1.81094e+07	0	6.53797e+08	0	0	1662370895	0	0	2931766228	3.63058e+07	0	2.83267e+08	1.53565e+07	0	5.90232e+08	3.18599e+07	0
P62259	215	0.999999	62.7296	88.47	K	DDAIAELDTLSEESYKDSTLIMQLLRDNLTL	AAFDDAIAELDTLSEESYK(1)DSTLIMQLLR	7.76883e+07	0	0	3.19054e+07	0	0	1.41043e+08	0	0	209899368	0	0	8.01319e+07	0	0	1.28721e+08	0	0	2.10159e+08	0	0	1.436e+07	0	0	1.62315e+08	0	0	1.23863e+08	0	0	0	0	0	1.06695e+08	0	0
P62484	174	0.997492	25.9965	149.59	K	NMKMGGLPRTTPPTQKPPSPPMSGKGTLGRH	TTPPTQK(0.997)PPSPPMSGK(0.003)	0	0	0	6.75345e+07	0	0	7.46988e+06	0	0	4.51807e+07	0	0	0	0	0	0	0	0	7.2037e+07	0	0	5.63744e+07	0	0	36688624	0	0	0	0	0	0	0	0	1.73319e+07	0	0
P62754	14	0.601794	4.03705	75.97	K	__MKLNISFPATGCQKLIEVDDERKLRTFYE	MK(0.161)LNISFPATGCQK(0.602)LIEVDDER(0.238)	3.51061e+07	0	0	0	0	0	3.17845e+07	0	0	0	0	0	2.96558e+07	0	0	0	0	0	7.28937e+07	0	0	0	0	0	0	0	0	0	0	0	0	0	0	1.89771e+07	0	0
P62983	63	1	81.4329	113.73	K	KQLEDGRTLSDYNIQKESTLHLVLRLRGGAK;KQLEDGRTLSDYNIQKESTLHLVLRLRGGII	TLSDYNIQK(1)ESTLHLVLR	0	0	0	0	0	0	0	0	0	0	0	0	0	0	0	0	0	0	3.00301e+07	0	0	2.10609e+07	0	0	9.313e+06	0	0	0	0	0	0	0	0	2.00149e+07	0	0
P63044	59	0.906554	9.86928	98.95	K	DIMRVNVDKVLERDQKLSELDDRADALQAGA	DQK(0.907)LSELDDR(0.093)ADALQAGASQFETSAAK	0	0	0	7.28875e+06	0	0	0	0	0	0	0	0	4.73102e+06	0	0	7.03311e+06	0	0	0	0	0	0	0	0	0	0	0	0	0	0	0	0	0	0	0	0
P63101	212	1	88.3367	132.02	K	DEAIAELDTLSEESYKDSTLIMQLLRDNLTL	TAFDEAIAELDTLSEESYK(1)DSTLIMQLLR	4.63701e+07	0	0	3.8434e+07	0	0	3.34501e+07	0	0	3.55284e+07	0	0	2.72225e+07	0	0	2.68613e+07	0	0	6.38558e+07	0	0	5.8702e+07	0	0	4.61527e+07	0	0	3.34928e+07	0	0	4.72253e+07	0	0	1.93138e+07	0	0
P63216	2	1	151.863	165.24	K	______________MKGETPVNSTMSIGQAR	MK(1)GETPVNSTMSIGQAR	4.19594e+07	0	0	1.08608e+08	0	0	1.03824e+08	0	0	4.95595e+07	0	0	3.60489e+07	0	0	5.35877e+07	0	0	1.01687e+08	0	0	7.6398e+07	0	0	0	0	0	3.73029e+07	0	0	9.1741e+07	0	0	3.60103e+07	0	0
P63318	335	1	92.427	254.02	K	SSSPIPSPSPSPTDSKRCFFGASPGRLHISD	MGPSSSPIPSPSPSPTDSK(1)R(1)	0	0	0	1.92777e+07	0	0	1.88994e+07	0	0	8.90271e+06	0	0	1.14261e+07	0	0	1.24084e+07	0	0	2.56546e+07	0	0	1.82987e+07	0	0	1.39218e+07	0	0	1.74932e+07	0	0	0	0	0	0	0	0
P63328	459	0.958139	14.1243	85.013	K	LQSATVEAIEADEAIKGFSPQHKITSFEEAK	QTLQSATVEAIEADEAIK(0.958)GFSPQH(0.005)K(0.037)	6.24848e+07	0	0	0	0	0	0	0	0	0	0	0	1.66565e+07	0	0	0	0	0	0	0	0	0	0	0	0	0	0	0	0	0	0	0	0	0	0	0
P67871	208	0.997553	26.1034	136.11	K	HPMAYQLQLQAASNFKSPVKTIR________	IHPMAYQLQLQAASNFK(0.998)SPVK(0.002)	2.89772e+07	0	0	9.90455e+07	0	0	1.01581e+08	0	0	3.62969e+07	0	0	1.14155e+07	0	0	1.01679e+08	0	0	1.14725e+08	0	0	1.18677e+08	0	0	1.71308e+08	0	0	5.46228e+07	0	0	1.59374e+07	0	0	9.39648e+07	0	0
P70392	635	1	86.5648	152.96	K	KDDTDICFSKTLNSCKVPQIRYASVERLLER	TLNSCK(1)VPQIR	9.4877e+06	0	0	5.01296e+07	0	0	7.21888e+07	0	0	5.05417e+07	0	0	4.29406e+07	0	0	4.4592e+07	0	0	6.2443e+07	0	0	7.07106e+06	0	0	8.48779e+06	0	0	5.4544e+06	0	0	5.34143e+07	0	0	5.01298e+07	0	0
P70429	332	1	98.1155	114.21	K	SEAGRKPWERSNSVEKPVSSLLSRTPSVAKS	SNSVEK(1)PVSSLLSR	3.05259e+07	0	0	5.72946e+07	0	0	3.19357e+07	0	0	5.37709e+07	0	0	4.72718e+07	0	0	40464867	0	0	3.6562e+07	0	0	3.68046e+07	0	0	4.0599e+07	0	0	2.82652e+07	0	0	3.57319e+07	0	0	4.60081e+07	0	0
P80318	48	0.999993	57.2896	62.823	K	IADIIRTCLGPKSMMKMLLDPMGGIVMTNDG	SMMK(1)MLLDPMGGIVMTNDGNAILR	0	0	0	0	0	0	0	0	0	0	0	0	0	0	0	6.02111e+06	0	0	0	0	0	0	0	0	0	0	0	0	0	0	0	0	0	0	0	0
P80560	180	0.712883	4.55425	64.498	K	TANAHSRIDHETRPAKGEDSSPENILTYVAH	IDH(0.026)ETR(0.25)PAK(0.713)GEDSSPENILTYVAH(0.011)TSALTYPPATR	0	0	0	0	0	0	0	0	0	0	0	0	0	0	0	2.09185e+07	0	0	0	0	0	0	0	0	0	0	0	7.86241e+06	0	0	1.2927e+07	0	0	1.7393e+07	0	0
P81122	302	1	87.8891	138.25	K	AMKALKELFEFRPRSKSQSSGSSATHPISVP	SK(1)SQSSGSSATHPISVPGAR	9.23928e+06	0	0	1.19228e+07	0	0	1.04174e+07	0	0	1.78295e+07	0	0	1.9873e+07	0	0	1.50905e+07	0	0	1.0727e+07	0	0	0	0	0	10223504	0	0	1.43911e+07	0	0	1.74098e+07	0	0	1.90414e+07	0	0
P83093	607	1	159.877	176.99	K	DTASECDSLNSSSGRKPSPPSSLEMYQTLSS	K(1)PSPPSSLEMYQTLSSR	1.93463e+07	0	0	8.08002e+06	0	0	1.11828e+07	0	0	0	0	0	5.60174e+06	0	0	0	0	0	1.95482e+07	0	0	1.791e+07	0	0	0	0	0	2.85059e+06	0	0	6.18712e+06	0	0	20006397	0	0
P83741	2279	0.999596	33.9348	86.367	K	GSKGHMNYEGPGMARKFSAPGQLCVPMTSNL	K(1)FSAPGQLCVPMTSNLGGSTPISAASATSLGHFTK	1.50962e+07	0	0	1.85759e+07	0	0	9.8257e+06	0	0	2.47531e+07	0	0	1.94496e+07	0	0	2.52894e+07	0	0	0	0	0	0	0	0	2.41204e+07	0	0	0	0	0	0	0	0	0	0	0
P97367	197	0.836586	7.0923	65.387	K	KMPIDLVIDERDGSSKSDHEELSGSSTNLAD	DGSSK(0.837)SDH(0.163)EELSGSSTNLADHNPSSWR	0	0	0	7.34967e+07	0	0	3.82892e+07	0	0	0	0	0	0	0	0	0	0	0	0	0	0	0	0	0	0	0	0	0	0	0	0	0	0	0	0	0
P97427	520	0.999698	35.1972	154.31	K	EVPATPKHAAPAPSAKSSPSKHQPPPIRNLH	HAAPAPSAK(1)SSPSK(0.975)H(0.025)QPPPIR	0	6.70747e+08	0	0	8.343e+08	0	0	8.95671e+08	0	0	6.31218e+08	0	0	3.46291e+08	0	0	371851472	0	0	1.35762e+07	0	0	4.20976e+08	0	0	4.04385e+08	0	0	2.29843e+08	0	0	2.70352e+08	0	0	1.92124e+08	0
P97427	525	0.999987	49.0945	154.31	K	PKHAAPAPSAKSSPSKHQPPPIRNLHQSNFS	SSPSK(1)HQPPPIR	8.95003e+06	6.70747e+08	0	4.39815e+08	8.343e+08	0	354840002	8.95671e+08	0	2.22521e+08	6.31218e+08	0	2.28465e+08	3.46291e+08	0	1.61987e+08	371851472	0	2.92171e+08	1.35762e+07	0	4.08209e+08	4.20976e+08	0	2.76126e+08	4.04385e+08	0	2.1211e+08	2.29843e+08	0	3.93232e+07	2.70352e+08	0	1.72808e+08	1.92124e+08	0
P97433	1120	1	114.858	114.86	K	LLLTDVLLFLQEKDQKYIFAAVDQKPSVISL	DQK(1)YIFAAVDQK(1)	0	0	0	0	0	0	0	0	0	0	0	0	0	0	0	0	0	0	0	0	0	0	0	0	0	0	0	0	0	0	0	0	0	0	0	0
P97445	1091	0.996227	24.2829	64.254	K	RTPNNPGNPSNPGPPKTPENSLIVTNPSSTQ	RTPNNPGNPSNPGPPK(0.996)TPENSLIVTNPSSTQPNSAK(0.004)	0	0	0	0	0	0	5.77476e+06	0	0	0	0	0	0	0	0	0	0	0	0	0	0	0	0	0	4.35882e+06	0	0	0	0	0	0	0	0	0	0	0
P97467	922	1	110.366	116.03	K	KLESSSGRVLGRLRGKGSSGLNLGNFFASRK	GK(1)GSSGLNLGNFFASR	8.27466e+06	0	0	6.66935e+06	0	0	5.65455e+06	0	0	8.65544e+06	0	0	1.30238e+07	0	0	0	0	0	0	0	0	0	0	0	0	0	0	0	0	0	0	0	0	0	0	0
P97863	321	0.957636	13.5421	187.75	K	RDQDMSSPTTMKKPEKPLFSSTSPQDSSPRL	K(0.042)PEK(0.958)PLFSSTSPQDSSPR	0	0	0	0	0	0	4.02933e+06	0	0	0	0	0	0	0	0	0	0	0	0	0	0	0	0	0	0	0	0	0	0	0	0	0	0	0	0	0
Q00PI9	225	0.991628	20.7492	110.44	K	RAYYEFREEAYHSRSKSPPPPEEEAKDEEED	SK(0.992)SPPPPEEEAK(0.008)DEEEDQTLVNLDTYTSDLHFQISK	943164561	0	0	1078996323	0	0	509551495	0	0	9.93646e+08	0	0	6.43338e+08	0	0	924737081	0	0	1794428867	0	0	1626315142	0	0	5.74229e+08	0	0	2.72645e+08	0	0	1.33716e+08	0	0	1.79541e+08	0	0
Q00PI9	235	0.94931	12.7249	121.19	K	YHSRSKSPPPPEEEAKDEEEDQTLVNLDTYT	SK(0.051)SPPPPEEEAK(0.949)DEEEDQTLVNLDTYTSDLHFQISK	4.78599e+08	0	0	4.05565e+08	0	0	1198550137	0	0	0	0	0	8.63219e+07	0	0	4.20258e+08	0	0	2.9945e+08	0	0	4.92971e+07	0	0	2090611192	0	0	7.25804e+08	0	0	1624571439	0	0	1228382870	0	0
Q01063	308	1	71.1827	232.37	K	KEKKKRPMSQISGVKKLMHSSSLTNSCIPRF	K(1)LMHSSSLTNSCIPR	4.16508e+07	0	0	3.10231e+07	0	0	3.16742e+07	0	0	2.79771e+07	0	0	3.44064e+07	0	0	4.1725e+07	0	0	1.74881e+07	0	0	1.60017e+07	0	0	2.42863e+07	0	0	2.99568e+07	0	0	4.7871e+07	0	0	2.91158e+07	0	0
Q01097	1312	0.999999	61.5782	210.43	K	KLRRQHSYDTFVDLQKEEAALAPRSVSLKDK	RQHSYDTFVDLQK(1)EEAALAPR	1.30071e+07	0	0	9.27666e+06	0	0	0	0	0	0	0	0	0	0	0	0	0	0	0	0	0	0	0	0	0	0	0	0	0	0	0	0	0	0	0	0
Q01097	1140	0.952624	13.3772	129.42	K	DKEGLRDFYLDQFRTKENSPHWEHVDLTDIY	TK(0.953)ENSPH(0.004)WEHVDLTDIYK(0.044)	0	0	0	8.67134e+06	0	0	4.02426e+06	0	0	0	0	0	0	0	0	0	0	0	0	0	0	0	0	0	0	0	0	0	0	0	0	0	0	0	0	0
Q02053	18	0.952653	13.4632	77.43	K	SSPLSKKRRVSGPDPKPGSNCSPAQSALSEV	R(0.043)VSGPDPK(0.953)PGSNCSPAQSALSEVSSVPTNGMAK(0.004)	0	0	0	0	0	0	0	0	0	4.75916e+06	0	0	3.52476e+06	0	0	0	0	0	3.11149e+06	0	0	0	0	0	0	0	0	0	0	0	0	0	0	0	0	0
Q02819	83	1	96.0343	135.61	K	REKLQAANAEDIKSGKLSQELDFVSHNVRTK	SGK(1)LSQELDFVSHNVR	1.64317e+07	0	0	1.64946e+07	0	0	2.58238e+07	0	0	2.20786e+07	0	0	3.71064e+07	0	0	2.23185e+07	0	0	3.44776e+07	0	0	4.01938e+07	0	0	3.48771e+07	0	0	7.56768e+07	0	0	2.2259e+07	0	0	4.41794e+07	0	0
Q03173	739	0.9992	30.974	100.18	K	PTRKPWERTNTMNGSKSPVISRPKSTPSSQP	TNTMNGSK(0.999)SPVISRPK(0.001)	3.485e+06	0	0	4.98332e+06	0	0	3.73286e+06	0	0	6.09916e+06	0	0	6.9419e+06	0	0	7.14233e+06	0	0	4.4905e+06	0	0	4.34693e+06	0	0	0	0	0	0	0	0	1.01341e+07	0	0	5.08379e+06	0	0
Q03391	997	0.979446	16.7912	106.18	K	AAGRPLSPPTTQPPQKPPPSYFAIVREQEPA	GAAGR(0.021)PLSPPTTQPPQK(0.979)PPPSYFAIVR	1.9102e+06	0	0	0	0	0	0	0	0	0	0	0	1.35517e+07	0	0	2.1507e+07	0	0	0	0	0	0	0	0	0	0	0	16738239	0	0	4.13788e+07	0	0	0	0	0
Q04447	107	0.492229	0	65.495	K	IIEERHGGYQPSDEHKTDLNPDNLQGGDDLD	H(0.016)GGYQPSDEH(0.492)K(0.492)TDLNPDNLQGGDDLDPNYVLSSR	0	0	0	0	0	0	0	0	0	0	0	0	0	0	0	0	0	0	0	0	0	0	0	0	0	0	0	0	0	0	0	0	0	0	0	0
Q148V7	242	0.999845	39.7167	130.47	K	KAAEHEVPLQERKNYKSSPEIQEPIKPLEKR	NYK(1)SSPEIQEPIKPLEK	0	0	0	0	0	0	7.2352e+07	0	0	0	0	0	0	0	0	3.95435e+07	0	0	0	0	0	0	0	0	2.15832e+07	0	0	0	0	0	0	0	0	2.52951e+07	0	0
Q148V7	252	0.651296	3.42672	101.61	K	ERKNYKSSPEIQEPIKPLEKRALNFLVNEFL	NYK(0.053)SSPEIQEPIK(0.651)PLEK(0.296)	0	0	0	0	0	0	4.60751e+07	0	0	0	0	0	0	0	0	0	0	0	0	0	0	0	0	0	0	0	0	2.95016e+07	0	0	0	0	0	0	0	0
Q2M3X8	235	1	68.6652	145.1	K	GPDPGAPVKLPCLPVKLSPPLPPKKVLICMP	LPCLPVK(1)LSPPLPPKK	7.66987e+07	0	0	4.67957e+07	0	0	2.08177e+07	0	0	2.79514e+07	0	0	2.25813e+07	0	0	3.1604e+07	0	0	4.58927e+07	0	0	4.27999e+07	0	0	7.1715e+07	0	0	1.84796e+07	0	0	4.61595e+07	0	0	9.56441e+06	0	0
Q3TES0	146	0.598544	1.7346	197.6	K	QSPHQHPVAPGAIADKEKERPSSCCAAAGAL	VQTPQSPHQHPVAPGAIADK(0.599)EK(0.401)	0	0	0	0	0	0	0	0	0	0	0	0	5.24369e+06	0	0	2.81344e+06	0	0	0	0	0	0	0	0	0	0	0	0	0	0	0	0	0	4.71488e+06	0	0
Q3TGW2	23	1	103.462	139.46	K	HRSIPRDPSDLSHNRKFSAACNFSNILVNQE	K(1)FSAACNFSNILVNQER	0	0	0	1.70206e+07	0	0	0	0	0	0	0	0	0	0	0	0	0	0	0	0	0	7.96916e+06	0	0	8.51564e+06	0	0	0	0	0	0	0	0	0	0	0
Q3TKT4	1417	0.999054	31.1312	165.24	K	EESKKQKKRGRPPAEKLSPNPPNLTKKMKKI	GRPPAEK(0.999)LSPNPPNLTK(0.001)	2.55734e+07	0	0	2.76884e+07	0	0	4.28317e+07	0	0	2.22838e+07	0	0	2.52381e+07	0	0	2.05857e+07	0	0	0	0	0	0	0	0	3.14525e+07	0	0	1.00824e+07	0	0	0	0	0	2.02773e+07	0	0
Q3TWN3	748	0.991126	23.5088	83.059	K	VSRTEVLAAGSPGENKSPPRPCGLNHSDSLS	TEVLAAGSPGENK(0.991)SPPR(0.004)PCGLNH(0.004)SDSLSR	0	0	0	0	0	0	2.70728e+07	0	0	3.07564e+07	0	0	2.42434e+07	0	0	0	0	0	0	0	0	1.79965e+07	0	0	0	0	0	1.60629e+07	0	0	0	0	0	0	0	0
Q3UH68	716	0.593925	1.8522	89.507	K	EMSGKVELVLSQKVAKPKSPEPEATLTFPFL	VAK(0.594)PK(0.388)SPEPEATLTFPFLDK(0.018)	9.10088e+06	0	0	0	0	0	1.95433e+07	0	0	0	0	0	0	0	0	0	0	0	0	0	0	0	0	0	0	0	0	0	0	0	0	0	0	0	0	0
Q3UH68	718	0.967361	15.1408	136.61	K	SGKVELVLSQKVAKPKSPEPEATLTFPFLDK	VAK(0.03)PK(0.967)SPEPEATLTFPFLDK(0.003)	0	0	0	1.84631e+07	0	0	0	0	0	1.88727e+07	0	0	3.68371e+07	0	0	5.20858e+06	0	0	0	0	0	1.57018e+07	0	0	1.71148e+07	0	0	2.22492e+07	0	0	2.65221e+07	0	0	1.80098e+07	0	0
Q3UHE1	952	0.601367	1.79597	104.9	K	ANPKPERAQSQPESDKDHERPLPALSWARGP	AQSQPESDK(0.601)DH(0.398)ER(0.001)PLPALSWAR	9.49738e+06	0	0	1.00267e+07	0	0	1.22381e+07	0	0	0	0	0	5.55597e+06	0	0	0	0	0	0	0	0	0	0	0	1.04018e+07	0	0	0	0	0	0	0	0	0	0	0
Q3UHE1	905	1	77.9409	141.1	K	HRSRPKKNNSRMILRKGSFGLHAQPEFLRKR	K(1)GSFGLHAQPEFLR	7.35571e+07	0	0	1.46553e+08	0	0	6.35794e+07	0	0	0	0	0	2.06295e+07	0	0	2.89729e+07	0	0	1.24052e+08	0	0	1.19735e+08	0	0	1.4202e+08	0	0	3.56674e+07	0	0	5.00234e+07	0	0	5.04896e+07	0	0
Q3UHE1	341	0.999153	32.9638	70.889	K	SSGVEDEDPKRPLPRKQSDSSTYDCEAITQH	K(0.999)QSDSSTYDCEAITQH(0.001)HAFLSSIHSSVLK	2.31916e+06	0	0	4.29646e+06	0	0	8.25988e+06	0	0	0	0	0	0	0	0	8.38927e+06	0	0	0	0	0	0	0	0	7.2491e+06	0	0	0	0	0	0	0	0	6.00385e+06	0	0
Q3UHF7	1041	0.99998	47.0897	130.19	K	QMPCPHPTEVPEIRSKSFDYGNLSHAPVAGT	SK(1)SFDYGNLSHAPVAGTSPSTLSPSR	4.85837e+07	0	0	4.39052e+07	0	0	5.43089e+07	0	0	2.27363e+07	0	0	2.63715e+07	0	0	2.17159e+07	0	0	3.30002e+07	0	0	3.79913e+07	0	0	5.62684e+07	0	0	1.43634e+07	0	0	1.97715e+07	0	0	2.06007e+07	0	0
Q3ULB5	560	0.999998	58.1168	230.45	K	DFGFCAQISKDVPKRKSLVGTPYWMAPEVIS;DFGFCAQVSKEVPKRKSLVGTPYWMAPEVIS	RK(1)SLVGTPYWMAPEVISR	7.87816e+07	0	0	9.31945e+07	0	0	8.94776e+07	0	0	4.57912e+07	0	0	2.51124e+07	0	0	4.51946e+07	0	0	1.03139e+08	0	0	7.80448e+07	0	0	7.25621e+07	0	0	0	0	0	4.13319e+07	0	0	1.67909e+07	0	0
Q3UNH4	681	0.964017	14.3603	109.56	K	IGSLPEREPSASTSQKDLAAAAAQKSPSAEA	SIGSLPER(0.035)EPSASTSQK(0.964)DLAAAAAQK(0.001)	0	0	0	0	0	0	8.713e+06	0	0	0	0	0	0	0	0	0	0	0	0	0	0	0	0	0	0	0	0	0	0	0	0	0	0	0	0	0
Q3UNH4	579	0.995255	23.2168	109.77	K	GVKVITQIPGATSPGKVETPSLQKEQPQLSE	VITQIPGATSPGK(0.995)VETPSLQK(0.005)	2.55464e+07	0	0	5.12049e+07	0	0	3.5016e+07	0	0	0	0	0	3.61248e+07	0	0	2.37285e+07	0	0	3.09424e+07	0	0	3.75737e+07	0	0	4.041e+07	0	0	1.08516e+07	0	0	2.08179e+07	0	0	1.87806e+07	0	0
Q3USB7	81	0.837501	7.12134	161.48	K	LLEAARATPRRSSIIKDPSNQKCGGRKKTVS	RSSIIK(0.838)DPSNQK(0.162)	0	0	0	0	0	0	0	0	0	0	0	0	0	0	0	0	0	0	0	0	0	0	0	0	0	0	0	0	0	0	0	0	0	0	0	0
Q3UUF8	229	0.534225	0.684401	88.295	K	CGGSDNTWDPDSPPRKPVIATNGPKLSQAPA	ELCGGSDNTWDPDSPPR(0.009)K(0.534)PVIATNGPK(0.456)	0	0	0	0	0	0	0	0	0	0	0	0	9.82596e+06	0	0	0	0	0	0	0	0	0	0	0	0	0	0	0	0	0	0	0	0	6.42647e+06	0	0
Q3UVR3	1137	0.986253	21.4287	84.653	K	RSTTQCKSPGSPHNPKTPPKSPVVPRRSPSA	SPGSPH(0.007)NPK(0.986)TPPK(0.007)SPVVPR	1.17567e+07	0	0	6.49576e+06	0	0	4.32371e+06	0	0	1.49343e+07	0	0	1.81473e+07	0	0	1.7281e+07	0	0	6.54614e+06	0	0	1.15242e+07	0	0	6.43456e+06	0	0	6.46406e+06	0	0	5.9263e+06	0	0	0	0	0
Q4ACU6	432	0.891143	9.13092	98.95	K	ENDISGPSAGRGGHNKISPSGPGGSGPAPGP	GGH(0.109)NK(0.891)ISPSGPGGSGPAPGPGPASPAPPAPPPR	0	0	0	0	0	0	0	0	0	0	0	0	0	0	0	0	0	0	0	0	0	4.8421e+06	0	0	0	0	0	0	0	0	0	0	0	0	0	0
Q4G0F8	605	0.984938	18.1613	82.426	K	KVIAPSKIKMKESSVKLDKKVSVPSGQHGGP	MK(0.015)ESSVK(0.985)LDK	0	0	0	0	0	0	0	0	0	0	0	0	0	0	0	0	0	0	0	0	0	0	0	0	0	0	0	8.06339e+06	0	0	1.34722e+07	0	0	0	0	0
Q4QRL3	1041	1	89.6185	110.98	K	QSQRAQEHSSRLQAEKSMMEMQGQELHRKLG	LQAEK(1)SMMEMQGQELHRK	0	0	0	0	0	0	0	0	0	0	0	0	0	0	0	0	0	0	0	0	0	0	0	0	0	0	0	0	0	0	0	0	0	0	0	0
Q4U2R1	2938	0.999925	41.2714	87.686	K	AVPFLASDNEEEEDDKGSTGSLIRKKTPGLE	IRAEEEDLAAVPFLASDNEEEEDDK(1)GSTGSLIR	0	0	0	0	0	0	7.35958e+06	0	0	0	0	0	0	0	0	0	0	0	0	0	0	0	0	0	0	0	0	0	0	0	0	0	0	0	0	0
Q4VA53	427	0.999997	54.7646	110.8	K	LAQIYKKYSLQSAAGKDAAKQISWVKDKLLH	YSLQSAAGK(1)DAAK(1)QISWVK	0	6.26177e+07	0	0	6.26072e+07	0	0	0	0	0	39891784	0	0	0	0	0	4.70143e+07	0	0	0	0	0	0	0	0	8.6276e+07	0	0	1.15894e+07	0	0	0	0	0	0	0
Q4VA53	431	0.999999	62.4301	110.8	K	YKKYSLQSAAGKDAAKQISWVKDKLLHIYYQ	YSLQSAAGK(1)DAAK(1)QISWVK	0	6.26177e+07	0	0	6.26072e+07	0	0	0	0	0	39891784	0	0	0	0	0	4.70143e+07	0	0	0	0	0	0	0	0	8.6276e+07	0	0	1.15894e+07	0	0	0	0	0	0	0
Q52KI8	804	1	66.1734	104.96	K	SSSRSVSGSPEPAAKKPPAPPSPVQSQSPST	K(1)PPAPPSPVQSQSPSTNWSPAVPAK(1)	3.97485e+06	3.67211e+07	0	0	3.70872e+07	0	0	4.43349e+07	0	0	3.12157e+07	0	0	3.49808e+07	0	0	3.29671e+07	0	0	1.5895e+07	0	0	9.27189e+07	0	0	5.35801e+07	0	0	7.18418e+07	0	0	4.3885e+07	0	5.79026e+06	3.72082e+07	0
Q569Z6	252	1	88.7574	160.03	K	ASVSDLSPRERSPALKSPLQSVVVRRRSPRP	ER(1)SPALK(1)SPLQSVVVR	0	0	0	0	3.80426e+07	0	0	4.54565e+07	0	0	2.36833e+07	0	0	3.55259e+07	0	0	2.99152e+07	0	0	0	0	0	3.86014e+07	0	0	0	0	0	3.2637e+07	0	0	0	0	0	3.81423e+07	0
Q569Z6	314	0.587036	1.53499	87.509	K	QGQFDHGSGSLSPSKKSPVGKSPPATGSAYG	K(0.587)SPVGK(0.412)SPPATGSAYGSSQK(0.001)	0	0	0	0	0	0	0	0	0	0	0	0	0	0	0	0	0	0	0	0	0	0	0	0	7.19342e+06	0	0	0	0	0	0	0	0	0	0	0
Q569Z6	319	0.999989	52.3199	169.72	K	HGSGSLSPSKKSPVGKSPPATGSAYGSSQKE	KSPVGK(1)SPPATGSAYGSSQK	1.01887e+07	0	0	1.89929e+07	0	0	1.05702e+07	0	0	4.34532e+06	0	0	4.70956e+06	0	0	0	0	0	2.45273e+06	0	0	0	0	0	6.09275e+06	0	0	0	0	0	0	0	0	7.95783e+06	0	0
Q5BLK4	642	0.999912	40.6066	116.85	K	KYFALPHKVTKPNLTKPPSPVTCVSDPYREA	VTKPNLTK(1)PPSPVTCVSDPYR	1.93041e+07	0	0	2.34472e+07	0	0	1.6367e+07	0	0	1.51206e+07	0	0	1.57393e+07	0	0	1.70701e+07	0	0	1.21879e+07	0	0	2.0503e+07	0	0	2.27224e+07	0	0	1.48406e+07	0	0	1.89716e+07	0	0	6.91634e+06	0	0
Q5DTL9	1046	0.799403	6.00442	124.28	K	ELSWLDDLMPESKKKKLEDAEKEEEQSMLAM	K(0.799)LEDAEK(0.201)EEEQSMLAMEDEGTVQLPLEGHYR	0	0	0	0	0	0	0	0	0	0	0	0	0	0	0	0	0	0	0	0	0	0	0	0	0	0	0	0	0	0	0	0	0	0	0	0
Q5DTL9	1052	0.999999	60.9379	136.01	K	DLMPESKKKKLEDAEKEEEQSMLAMEDEGTV	LEDAEK(1)EEEQSMLAMEDEGTVQLPLEGHYR	4.5148e+07	0	0	6.02785e+07	0	0	7.26598e+07	0	0	3.19052e+07	0	0	1.05718e+07	0	0	4.32899e+07	0	0	4.73889e+07	0	0	7.07162e+07	0	0	8.52334e+07	0	0	3.85734e+07	0	0	0	0	0	0	0	0
Q5DTM8	530	0.999289	33.7935	120.32	K	SGSALLQSQSSTEDPKDEPTELKQDSEDLAT	SGSALLQSQSSTEDPK(0.999)DEPTELKQDSEDLATHSSALK	2.24346e+07	0	0	3.05314e+07	0	0	2.41774e+07	0	0	1.82425e+07	0	0	2.12267e+07	0	0	2.04118e+07	0	0	0	0	0	3.66184e+07	0	0	0	0	0	2.28962e+07	0	0	3.57357e+07	0	0	2.80679e+07	0	0
Q5DTN8	621	0.999918	40.8888	187.56	K	ELLEFRILELEERERKSPAINFHHTPFVDGK	ERK(1)SPAINFHHTPFVDGK	1.60414e+07	0	0	1.78601e+07	0	0	1.747e+07	0	0	3.38104e+07	0	0	2.0352e+07	0	0	2.26443e+07	0	0	0	0	0	1.75331e+07	0	0	1.72712e+07	0	0	0	0	0	0	0	0	0	0	0
Q5DTY9	128	1	67.0619	110.27	K	FQLPDLVKLLAPEDVKQSPDEFCHSDFEDAS	LLAPEDVK(1)QSPDEFCH(1)SDFEDASQGSDTR	8.40198e+07	4.08246e+07	0	1.11673e+08	1.94512e+07	0	8.54382e+07	2.28255e+07	0	4.13814e+07	1.16305e+07	0	6.03674e+07	0	0	4.70903e+07	0	0	0	6.35948e+07	0	9.6386e+07	39573593	0	6.48196e+07	5.02195e+07	0	7.73528e+07	0	0	7.32752e+07	2.68185e+07	0	6.30729e+07	0	0
Q5DU25	399	1	177.511	244.18	K	FEEYEKAQNPAYFEGKPASLDEGAMAGARSH	AQNPAYFEGK(1)PASLDEGAMAGAR	0	0	0	6.90175e+07	0	0	4.93267e+07	0	0	1.82914e+07	0	0	1.9341e+07	0	0	0	0	0	5.25535e+07	0	0	8.12535e+07	0	0	7.62349e+07	0	0	2.28018e+07	0	0	3.78136e+07	0	0	3.50073e+07	0	0
Q5FWH2	21	0.999995	53.072	116.45	K	KAAAAALSGSPPQTEKPTHYRYLKEFRTEQC	AAAAALSGSPPQTEK(1)PTHYR	0	0	0	1.61344e+07	0	0	0	0	0	9.36807e+06	0	0	0	0	0	8.0618e+06	0	0	0	0	0	0	0	0	5.37092e+06	0	0	0	0	0	0	0	0	0	0	0
Q5I043	359	1	84.8857	90.707	K	PSDRSVKYGQERWFTKLPPVLTFELSRFEFN	WFTK(1)LPPVLTFELSR	5.48925e+07	0	0	3.49328e+07	0	0	6.96869e+07	0	0	2.95449e+07	0	0	19256171	0	0	3.76878e+07	0	0	4.05199e+07	0	0	113199185	0	0	1.7321e+08	0	0	0	0	0	0	0	0	0	0	0
Q5NCR9	25	1	66.0254	69.071	K	LILPKKTQPLHRVLQKPSVFGSDSDDDETSV	VLQK(1)PSVFGSDSDDDETSVSESLQR	0	0	0	0	0	0	0	0	0	0	0	0	0	0	0	0	0	0	1.39688e+07	0	0	0	0	0	9.77506e+06	0	0	0	0	0	0	0	0	0	0	0
Q5RJH6	731	0.971207	17.755	84.156	K	AQQQQSPTKVIPALGKSPPHHSGFQQYQQAD	VIPALGK(0.971)SPPH(0.016)H(0.012)SGFQQYQQADASK(0.001)	5.78043e+06	0	0	3.08426e+07	0	0	1.61158e+07	0	0	1.74714e+07	0	0	1.38716e+07	0	0	1.0128e+07	0	0	8.7157e+06	0	0	9.17398e+06	0	0	2.55345e+07	0	0	0	0	0	1.24511e+07	0	0	1.00125e+07	0	0
Q5SVL6	9	0.616876	4.66324	67.064	K	_______MLAGLKVKKQELANSSDVTLPDRP	K(0.617)QELANSSDVTLPDR(0.172)PLSPPLTAPPTMK(0.211)	5.9948e+06	0	0	0	0	0	0	0	0	0	0	0	0	0	0	0	0	0	0	0	0	0	0	0	0	0	0	0	0	0	0	0	0	0	0	0
Q5SXY1	353	0.999858	38.481	147.53	K	PSRPLSATSNPFKSSKGSPTGSSPNNASELS	SSK(1)GSPTGSSPNNASELSLASLTEK	0	0	0	8.96e+06	0	0	6.1863e+06	0	0	6.80612e+06	0	0	5.43512e+06	0	0	0	0	0	0	0	0	1.4167e+07	0	0	1.81734e+07	0	0	0	0	0	1.06972e+07	0	0	0	0	0
Q5U4C1	799	1	105.781	117.04	K	DEDRFEPAAKINEENKIASEDEDTVGSWFWG	INEENK(1)IASEDEDTVGSWFWGNEEASLEAVR	7.61244e+06	0	0	0	0	0	4.71304e+06	0	0	0	0	0	2.02655e+07	0	0	0	0	0	0	0	0	8.68221e+06	0	0	0	0	0	2.22784e+07	0	0	0	0	0	7.14812e+06	0	0
Q60598	399	0.999997	54.9683	83.874	K	QEEARRKLEEQARAKKQTPPASPSPQPIEDR	K(1)QTPPASPSPQPIEDR(0.865)PPSSPIYEDAAPFK(0.135)	8.53692e+07	1.13955e+08	0	8.53207e+07	1.01177e+08	0	8.47899e+07	8.26956e+07	0	5.54992e+07	1.00592e+08	0	5.29983e+07	9.5012e+07	0	5.36767e+07	141951309	0	9.03569e+07	1.97286e+08	0	1.20862e+08	1.2282e+08	0	6.09808e+07	0	0	5.96899e+07	1.10824e+08	0	6.00986e+07	1.36204e+08	0	4.86323e+07	2.06271e+08	0
Q60680	617	1	82.8369	82.837	K	KELFGHLSKLLGCKQKIIDLLPKVEVALSNI	QK(1)IIDLLPK(1)VEVALSNIK(1)	0	0	6.71024e+06	0	0	0	0	0	0	0	0	0	0	0	1.53166e+06	0	0	0	0	0	0	0	0	0	0	0	0	0	0	0	0	0	3.07524e+06	0	0	1.37743e+06
Q60680	624	1	82.8369	82.837	K	SKLLGCKQKIIDLLPKVEVALSNIKEADNTV	QK(1)IIDLLPK(1)VEVALSNIK(1)	0	0	6.71024e+06	0	0	0	0	0	0	0	0	0	0	0	1.53166e+06	0	0	0	0	0	0	0	0	0	0	0	0	0	0	0	0	0	3.07524e+06	0	0	1.37743e+06
Q60902	233	0.981174	17.1699	87.468	K	VFAGAVPVLPASPPPKDSLRSTPSHGSVSSL	TVFAGAVPVLPASPPPK(0.981)DSLR(0.019)	0	0	0	1.04453e+07	0	0	1.20243e+07	0	0	8.55138e+06	0	0	0	0	0	0	0	0	0	0	0	1.58297e+07	0	0	5.2076e+06	0	0	0	0	0	0	0	0	0	0	0
Q60932	122	0.651491	2.71694	217.2	K	GLKLTFDSSFSPNTGKKNAKIKTGYKREHIN	LTFDSSFSPNTGK(0.651)K(0.349)	5.96235e+07	0	0	8.47605e+07	0	0	7.12199e+07	0	0	6.68712e+07	0	0	5.00347e+07	0	0	5.99004e+07	0	0	1.80827e+08	0	0	9.19436e+07	0	0	6.9535e+07	0	0	7.16004e+07	0	0	8.63191e+07	0	0	4.89442e+07	0	0
Q61070	323	0.936769	11.7438	74.222	K	TVYLQSALSSSSSAEKFPSPHPSPAKLKAAA	TVYLQSALSSSSSAEK(0.937)FPSPH(0.001)PSPAK(0.063)	6.17174e+06	0	0	2.13107e+07	0	0	1.32987e+07	0	0	1.79411e+07	0	0	9.86349e+06	0	0	0	0	0	1.68935e+07	0	0	0	0	0	1.13793e+07	0	0	6.29965e+06	0	0	1.28317e+07	0	0	8.16136e+06	0	0
Q61120	403	0.999995	52.9376	85.054	K	EAEALLREDGDFLVRKSTTNPGSFVLTGMHN	K(1)STTNPGSFVLTGMHNGQAK	0	0	0	7.96876e+06	0	0	7.67558e+06	0	0	8.92332e+06	0	0	0	0	0	1.66484e+06	0	0	5.23821e+06	0	0	0	0	0	7.14484e+06	0	0	8.1273e+06	0	0	0	0	0	0	0	0
Q61137	302	0.979643	16.8238	74.171	K	TPGSDNAKLSLMNKYKDNIIATSPVDSNHQQ	YK(0.98)DNIIATSPVDSNH(0.02)QQATLLSHTSSSQR	0	0	0	1.54699e+07	0	0	0	0	0	9.21953e+06	0	0	0	0	0	0	0	0	0	0	0	0	0	0	0	0	0	0	0	0	0	0	0	0	0	0
Q61165	694	1	86.1725	228.32	K	QLEQKITNYLTVPAHKLDSPTLSRARIGSDP	ITNYLTVPAHK(1)LDSPTLSR	3.31152e+07	0	0	4.07549e+07	0	0	1.52632e+07	0	0	4.48845e+07	0	0	3.21763e+07	0	0	3.99812e+07	0	0	1.69639e+07	0	0	1.51132e+07	0	0	1.61628e+07	0	0	6.87937e+07	0	0	2.77435e+07	0	0	1.94778e+07	0	0
Q61206	207	0.502236	0.0389888	102.5	K	FDFLHLTGGGYAKICKPLHELIMQLLEETPE	ICK(0.502)PLHELIMQLLEETPEEK(0.498)	0	0	0	0	0	0	0	0	0	5.06327e+07	0	0	0	0	0	0	0	0	0	0	0	0	0	0	0	0	0	0	0	0	0	0	0	0	0	0
Q61290	734	1	123.756	158.65	K	EEEEAFNQKHALQKAKEVSPMSAPNMPSIER	AK(1)EVSPMSAPNMPSIER	5.10665e+06	0	0	9.6828e+06	0	0	3.42118e+06	0	0	0	0	0	3.69302e+06	0	0	0	0	0	0	0	0	10750612	0	0	0	0	0	0	0	0	0	0	0	0	0	0
Q61315	1769	0.999441	32.5265	172.42	K	TSSGANKNQVDTKKKKPTSPVKPMPQNTEYR	K(0.999)PTSPVK(0.001)PMPQNTEYR	2.82493e+07	0	0	4.65942e+07	0	0	3.88236e+07	0	0	3.81592e+07	0	0	3.93291e+07	0	0	2.81025e+07	0	0	2.98054e+07	0	0	3.78255e+07	0	0	4.61983e+07	0	0	2.39295e+07	0	0	0	0	0	4.37174e+07	0	0
Q61315	1369	1	76.4537	149.12	K	SSGAKSPSKSGAQTPKSPPEHYVQETPLVFS	SGAQTPK(1)SPPEHYVQETPLVFSR	0	0	0	7.31699e+07	0	0	0	0	0	0	0	0	0	0	0	0	0	0	1.309e+08	0	0	1.07178e+08	0	0	7.18986e+07	0	0	0	0	0	0	0	0	0	0	0
Q61316	502	0.815953	6.48624	139.97	K	HGIFSVSSAALVEVHKSEESEEPMETDQNAK	VNVHGIFSVSSAALVEVH(0.183)K(0.816)SEESEEPMETDQNAKEEEK	1.27656e+07	0	0	1.98418e+07	0	0	4.0022e+07	0	0	0	0	0	0	0	0	0	0	0	5.61681e+07	0	0	2.89441e+07	0	0	0	0	0	0	0	0	2.37046e+07	0	0	9.73776e+06	0	0
Q61410	108	1	93.4359	120.55	K	PLQASPDKVPLDVHRKTSGLVSLHSRRGAKA	K(1)TSGLVSLHSR	1.892e+07	0	0	2.64466e+07	0	0	1.66233e+07	0	0	1.23937e+07	0	0	1.25554e+07	0	0	2.0128e+07	0	0	1.3642e+07	0	0	1.76242e+07	0	0	0	0	0	5.40461e+06	0	0	1.0689e+07	0	0	0	0	0
Q61410	100	0.994631	23.9983	64.318	K	VIHVQGGSPLQASPDKVPLDVHRKTSGLVSL	LQDVIH(1)VQGGSPLQASPDK(0.995)VPLDVH(0.004)R(0.001)	0	1.42125e+07	0	2.38339e+07	0	0	1.79306e+07	0	0	1.27303e+07	0	0	2.91237e+07	0	0	18009479	0	0	2.8943e+07	0	0	3.57622e+07	1.21082e+07	0	3.72573e+07	0	0	0	0	0	1.98169e+07	1.05318e+07	0	0	1.0038e+07	0
Q61548	289	0.59106	1.59971	108.36	K	LMETLEQHLNTLEGKKPGNNEGSGAPSPLSK	K(0.591)PGNNEGSGAPSPLSK(0.409)	0	0	0	1.65436e+07	0	0	0	0	0	0	0	0	0	0	0	7.9063e+06	0	0	0	0	0	3.44142e+06	0	0	0	0	0	0	0	0	0	0	0	0	0	0
Q61644	319	0.987128	18.8773	74.861	K	PDLPHTTAKKEKQPKKAEGATLSNATGAVES	K(0.987)AEGATLSNATGAVESTSQAGDR(0.013)GSVSSYDR	0	0	0	1.58846e+07	0	0	0	0	0	0	0	0	0	0	0	0	0	0	0	0	0	0	0	0	0	0	0	0	0	0	0	0	0	0	0	0
Q61879	1152	1	71.805	74.665	K	AEKQKRDLSEELEALKTELEDTLDTTAAQQE	DLSEELEALK(1)TELEDTLDTTAAQQELR	5.36033e+06	0	0	5.83248e+06	0	0	5.54663e+06	0	0	0	0	0	0	0	0	0	0	0	1.11706e+07	0	0	0	0	0	6.38006e+06	0	0	0	0	0	0	0	0	0	0	0
Q61990	181	1	83.0558	260.98	K	MLESPPKGVTIPYRPKPSSSPVIFAGGQDRY	GVTIPYRPK(1)PSSSPVIFAGGQDR	3.09577e+07	0	0	0	0	0	3.58224e+07	0	0	3.83266e+07	0	0	0	0	0	4.93707e+07	0	0	0	0	0	0	0	0	0	0	0	3.30681e+07	0	0	5.12895e+06	0	0	3.7045e+07	0	0
Q62172	37	1	94.6415	161.04	K	SGLTRTPSSEEISPTKFPGLYRTGEPSPPHD	TPSSEEISPTK(1)FPGLYR	1.15699e+07	0	0	0	0	0	0	0	0	9.73039e+06	0	0	0	0	0	0	0	0	3.65569e+07	0	0	3.68765e+07	0	0	0	0	0	0	0	0	0	0	0	5.84885e+06	0	0
Q62261	2343	1	139.34	254.59	K	LPTSVVTITSESSPGKREKDKEKDKEKRFSL	AQTLPTSVVTITSESSPGK(1)R	7.23531e+07	0	0	189913623	0	0	1.47266e+08	0	0	9.69863e+07	0	0	9.86268e+07	0	0	1.442e+08	0	0	2.19504e+08	0	0	1.47595e+08	0	0	1.68162e+08	0	0	1.57198e+08	0	0	1.82298e+08	0	0	8.58545e+07	0	0
Q62261	2309	0.999677	34.9065	106.42	K	MNTWIQAISSAISSDKHDTSASTQSTPASSR	DDEEMNTWIQAISSAISSDK(1)H(1)DTSASTQSTPASSR(0.001)	0	1.13201e+07	0	2.58623e+07	1.82818e+07	0	2.65511e+07	2.99593e+07	0	2.31055e+07	2.39778e+07	0	0	2.13598e+07	0	0	2.31759e+07	0	3.13503e+07	1.70813e+07	0	2.5045e+07	2.35487e+07	0	0	3.16219e+07	0	4.83704e+07	2.29104e+07	0	0	3.41433e+07	0	0	3.39417e+07	0
Q62261	2122	0.999993	51.6205	88.433	K	TKVSEEAESQQWDTSKGDQVSQNGLPAEQGS	VSEEAESQQWDTSK(1)GDQVSQNGLPAEQGSPR	6.48459e+07	0	0	0	0	0	105113488	0	0	4.12672e+07	0	0	7.35078e+07	0	0	9.13645e+07	0	0	7.46128e+07	0	0	6.91317e+07	0	0	0	0	0	9.34384e+07	0	0	7.1478e+07	0	0	8.78511e+06	0	0
Q62393	174	0.999958	44.929	166.24	K	VITKKLEDVKNSPTFKSFEEKVENLKSKVGG	NSPTFK(1)SFEEKVENLK	5.17156e+07	0	0	4.61639e+07	0	0	4.48506e+07	0	0	0	0	0	5.46107e+07	0	0	3.33428e+07	0	0	9.24731e+06	0	0	0	0	0	0	0	0	4.46931e+07	0	0	0	0	0	8.97471e+07	0	0
Q62418	23	1	145.458	170.42	K	NGPALQEAYVRVVTEKSPTDWALFTYEGNSN	VVTEK(1)SPTDWALFTYEGNSNDIR	0	0	0	0	0	0	0	0	0	0	0	0	0	0	0	0	0	0	0	0	0	1.61381e+07	0	0	0	0	0	0	0	0	0	0	0	9.68436e+06	0	0
Q63918	291	1	93.6446	143.76	K	TPNHQKASSGKSSPFKVSPLSFGRKKVREGE	SSPFK(1)VSPLSFGR	3.06193e+07	0	0	2.72472e+07	0	0	2.53371e+07	0	0	2.34275e+07	0	0	1.51273e+07	0	0	2.7319e+07	0	0	2.6205e+07	0	0	0	0	0	2.97328e+07	0	0	2.91217e+07	0	0	2.25122e+07	0	0	8.92518e+06	0	0
Q63943	250	0.999999	62.3959	100.39	K	LPVANGNSLNKVIPAKSPPPPTHNTQLGAPS	VIPAK(1)SPPPPTHNTQLGAPSR	0	0	0	9.57076e+06	0	0	2.03288e+06	0	0	0	0	0	0	0	0	0	0	0	1.81213e+06	0	0	0	0	0	0	0	0	0	0	0	9.28582e+06	0	0	0	0	0
Q64511	287	1	73.1104	73.11	K	PVNGFRSYVDLYVKDKLDETGVALKVIHELA	DK(1)LDETGVALK(1)VIH(1)ELANER(1)	0	0	4.47979e+07	0	0	1.53415e+08	0	0	7.97891e+07	0	0	2.425e+08	0	0	4.14319e+07	0	0	0	0	0	1.80419e+08	0	0	4.31077e+07	0	0	1.89157e+08	0	0	1.10142e+08	0	0	9.66044e+07	0	0	0
Q64511	296	1	73.1104	73.11	K	DLYVKDKLDETGVALKVIHELANERWDVCLT	DK(1)LDETGVALK(1)VIH(1)ELANER(1)	0	0	4.47979e+07	0	0	1.53415e+08	0	0	7.97891e+07	0	0	2.425e+08	0	0	4.14319e+07	0	0	0	0	0	1.80419e+08	0	0	4.31077e+07	0	0	1.89157e+08	0	0	1.10142e+08	0	0	9.66044e+07	0	0	0
Q64511	1561	1	110.285	117.21	K	NPGRKPSKTASKKPKKTSFDQDSDVDIFPSD	K(1)TSFDQDSDVDIFPSDFTSEPPALPR	0	0	0	5.73483e+07	0	0	4.94117e+07	0	0	5.09092e+07	0	0	4.06078e+07	0	0	5.00102e+07	0	0	0	0	0	3.44487e+07	0	0	7.93332e+07	0	0	0	0	0	0	0	0	0	0	0
Q64511	1385	1	97.4886	145.03	K	AAAADDSNDLEELKVKASPITNDGEDEFVPS	VK(1)ASPITNDGEDEFVPSDGLDKDEYAFSSGK	2.45022e+07	0	0	2.76114e+07	0	0	3.11681e+07	0	0	1.76037e+07	0	0	3.54271e+07	0	0	2.08255e+07	0	0	1.49226e+07	0	0	3.54532e+07	0	0	2.42786e+07	0	0	0	0	0	3.43429e+07	0	0	5.54688e+07	0	0
Q68FF6	439	0.568404	1.19579	96.561	K	DLSDGAVTLQEYLELKKALATSEAKVQQLMK	SMDSSDLSDGAVTLQEYLELK(0.568)K(0.432)	0	0	0	0	0	0	0	0	0	0	0	0	0	0	0	0	0	0	0	0	0	0	0	0	0	0	0	0	0	0	0	0	0	5.70235e+06	0	0
Q68FH0	1088	1	103.062	164.7	K	SQGDTTHKGLYPGSSKPSPIYISSYSSPARE	GLYPGSSK(1)PSPIYISSYSSPAR	1.88847e+07	0	0	1.344e+07	0	0	3.56636e+07	0	0	3.54297e+07	0	0	2.27975e+07	0	0	0	0	0	6.38104e+07	0	0	0	0	0	4.17234e+07	0	0	2.40907e+07	0	0	1.76653e+07	0	0	2.22212e+07	0	0
Q68FH0	773	0.999602	36.3399	115.84	K	QARLLGLNELDDLLGKESPSKDSEPSCWGKK	LLGLNELDDLLGK(1)ESPSKDSEPSCWGK	2.30539e+08	0	0	1.97227e+08	0	0	1.89218e+08	0	0	1.30866e+08	0	0	1.53933e+08	0	0	1.67214e+08	0	0	5.30879e+08	0	0	3.39071e+08	0	0	1.89951e+08	0	0	9.22737e+07	0	0	2.88636e+08	0	0	2.19837e+08	0	0
Q68FL6	829	0.999996	54.0649	98.98	K	NLRQRFGGGQAKGSPKPAAVEAVTAAGSQHI	GSPK(1)PAAVEAVTAAGSQHIQTLTDEVTK	0	0	0	0	0	0	1.49413e+07	0	0	0	0	0	0	0	0	0	0	0	0	0	0	0	0	0	1.89003e+07	0	0	9.61655e+06	0	0	0	0	0	1.75424e+07	0	0
Q69Z38	894	1	111.579	240.18	K	YHASNLLQRHFTNWTKPTSPTRSTEAESILH	HFTNWTK(1)PTSPTR	2.69138e+07	0	0	3.2485e+07	0	0	2.25237e+07	0	0	1.62531e+07	0	0	3.82178e+07	0	0	4.70513e+07	0	0	3.28334e+07	0	0	3.94038e+07	0	0	4.50656e+07	0	0	1.30538e+07	0	0	3.18725e+07	0	0	2.80532e+07	0	0
Q69Z98	454	0.999914	40.6647	146.45	K	GSPLPTPKGTPVHTPKESPAGTPNPTPPSSP	GTPVHTPK(1)ESPAGTPNPTPPSSPSVGGVPWR	3.04954e+06	0	0	9.42527e+06	1.14957e+07	0	0	0	0	6.67364e+06	9.94504e+06	0	6.20973e+06	0	0	8.56604e+06	8.6252e+06	0	0	7.86524e+06	0	0	0	0	4.39839e+06	0	0	6.40085e+06	7.35037e+06	0	1.1226e+07	0	0	6.88608e+06	1.08645e+07	0
Q69ZW3	440	0.999953	43.4042	63.427	K	ENTVVSAGKDLSTSPKPSPIPSPVLGQKPNA	DLSTSPK(1)PSPIPSPVLGQKPNASQSLLAWCR	0	0	0	1.64059e+07	0	0	1.18968e+07	0	0	1.3746e+07	0	0	1.07456e+07	0	0	1.02279e+07	0	0	2.38476e+07	0	0	0	0	0	0	0	0	2.43073e+07	0	0	2.06473e+07	0	0	2.36444e+07	0	0
Q6A065	834	0.99951	33.0992	88.951	K	ESSKSLVRQGSFTIDKPSSNIPIELIPHINK	QGSFTIDK(1)PSSNIPIELIPHINK	2.33348e+07	0	0	4.92652e+07	0	0	3.29411e+07	0	0	3.84013e+07	0	0	3.93944e+07	0	0	1.27122e+07	0	0	3.86924e+07	0	0	3.04404e+07	0	0	0	0	0	2.20582e+07	0	0	3.05364e+07	0	0	2.66958e+07	0	0
Q6GYP7	1470	0.699481	4.65236	49.98	K	LASVDYDPFMHLESLKEPEPLHSPDSERSSK	YFPISLSDLASVDYDPFMH(0.24)LESLK(0.699)EPEPLH(0.052)SPDSER(0.009)	0	0	0	0	0	0	0	0	0	0	0	0	0	0	0	0	0	0	7.57021e+07	0	0	0	0	0	0	0	0	0	0	0	0	0	0	0	0	0
Q6NXM2	6	0.999986	48.4882	91.518	K	__________MVDVGKWPIFTLLSPQEAGSI	MVDVGK(1)WPIFTLLSPQEAGSIR	0	0	0	0	0	0	0	0	0	0	0	0	0	0	0	0	0	0	0	0	0	0	0	0	0	0	0	0	0	0	0	0	0	0	0	0
Q6NXN1	38	0.5	0	89.149	K	LEKKLKITQKESRKSKSPPKVPIVIQDDSLP	SK(0.5)SPPK(0.5)VPIVIQDDSLPTGPPPQIR	0	0	0	1.11269e+07	0	0	1.9363e+06	0	0	0	0	0	0	0	0	0	0	0	0	0	0	1.05242e+07	0	0	1.14563e+07	0	0	0	0	0	0	0	0	0	0	0
Q6NXN1	42	0.943404	12.2191	98.7	K	LKITQKESRKSKSPPKVPIVIQDDSLPTGPP	SK(0.057)SPPK(0.943)VPIVIQDDSLPTGPPPQIR	1.41689e+07	0	0	1.11269e+07	0	0	1.9363e+06	0	0	0	0	0	1.86564e+07	0	0	2.31459e+07	0	0	2.60177e+07	0	0	1.05242e+07	0	0	1.14563e+07	0	0	6.61874e+06	0	0	2.10234e+07	0	0	1.45203e+07	0	0
Q6NZC7	746	1	94.2661	115.14	K	KEMASPSSESNESKRKLSVGAYVSSVRVDYE	K(1)LSVGAYVSSVR	1.27877e+07	0	0	1.30533e+07	0	0	1.57268e+07	0	0	1.11548e+07	0	0	1.76275e+07	0	0	1.31918e+07	0	0	2.16196e+07	0	0	3.14471e+07	0	0	0	0	0	2.46809e+07	0	0	2.5933e+07	0	0	1.32249e+07	0	0
Q6P1I6	742	0.883503	8.82267	142.72	K	EARLATIEGDDPALRKTHSSPALSLGHGPVT	K(0.884)TH(0.116)SSPALSLGHGPVTGSK(0.001)	0	0	0	5.85706e+07	0	0	2.52879e+07	0	0	7.6812e+07	0	0	4.25171e+07	0	0	6.79937e+07	0	0	0	0	0	1.22027e+07	0	0	2.39593e+07	0	0	8.699e+07	0	0	5.69937e+07	0	0	5.27927e+07	0	0
Q6P4S6	220	0.999896	39.8242	86.492	K	ADFGFSNLFTPGQLLKTWCGSPPYAAPELFE	IADFGFSNLFTPGQLLK(1)TWCGSPPYAAPELFEGK	0	0	0	2.46081e+06	0	0	7.41145e+06	0	0	1.45187e+07	0	0	1.17272e+07	0	0	0	0	0	0	0	0	0	0	0	0	0	0	28816275	0	0	1.25315e+07	0	0	2.12028e+07	0	0
Q6P5G6	251	0.474601	0.290468	98.085	K	LGEHGQLDGLSSSPPKKCARSESLIDASEDS	LVEWHQLDVSSFLDQVTGFLGEH(0.081)GQLDGLSSSPPK(0.475)K(0.444)	0	0	0	0	0	0	0	0	0	0	0	0	0	0	0	0	0	0	0	0	0	0	0	0	0	0	0	0	0	0	0	0	0	0	0	0
Q6P9K8	1275	0.999927	42.1425	160.3	K	PEVKRAHGTPPPVSPKPPPPPTAPKPAKALA	AHGTPPPVSPK(1)PPPPPTAPK	1.38651e+07	0	0	5.39981e+07	0	0	1.86743e+07	0	0	4.24375e+07	0	0	4.17868e+07	0	0	3.99402e+07	0	0	1.94648e+07	0	0	5.43852e+07	0	0	2.68999e+06	0	0	2.69563e+07	0	0	3.52277e+07	0	0	3.80239e+07	0	0
Q6P9K8	1329	0.999489	33.6437	114.05	K	IKPASSPPSQSASPVKPPSPGTPALHVPAKP	PASSPPSQSASPVK(0.999)PPSPGTPALHVPAKPPR	0	0	0	2.10874e+07	0	0	1.89799e+07	0	0	3.57748e+07	0	0	2.94036e+07	0	0	4.82295e+07	0	0	3.06133e+07	0	0	1.35185e+07	0	0	1.13804e+07	0	0	0	0	0	1.4001e+07	0	0	0	0	0
Q6PAR5	951	0.918278	11.0985	89.366	K	TSLVAAPHSSSSSPSKDSSRGETEERKDSDD	RPGNEELPPAAATGATSLVAAPH(0.071)SSSSSPSK(0.918)DSSR(0.01)	0	0	0	1.44429e+07	0	0	9.72434e+06	0	0	0	0	0	1.05293e+07	0	0	8.78e+06	0	0	0	0	0	1.09594e+07	0	0	0	0	0	0	0	0	0	0	0	0	0	0
Q6PCP5	88	0.994676	23.2418	98.766	K	DLDLIQSTPFKPLALKTPPRVLTLSERPLDF	PADLDLIQSTPFK(0.005)PLALK(0.995)TPPR(0.001)	1.49059e+07	0	0	0	0	0	3.45211e+06	0	0	1.48828e+07	0	0	1.12784e+07	0	0	9.56835e+06	0	0	0	0	0	0	0	0	0	0	0	0	0	0	0	0	0	0	0	0
Q6PFX9	391	0.858963	7.06892	71.545	K	RIVQLLLQHGADVHAKDKGGLVPLHNACSYG	VR(0.001)IVQLLLQH(0.999)GADVH(0.282)AK(0.859)DK(0.859)	0	0	0	0	0	0	0	0	0	0	0	0	0	0	0	0	0	1.07775e+08	0	0	8.57954e+07	0	0	2.01742e+07	0	0	132778780	0	0	5.5421e+07	0	0	1.19782e+07	0	0	0
Q6PGE7	602	1	223.426	305.33	K	RTGMYVATLAGSQSPKPLMVHMRKYGGITSF	TGMYVATLAGSQSPK(1)PLMVHMR	8.03524e+07	0	0	6.84565e+07	0	0	0	0	0	5.52271e+07	0	0	8.74153e+07	0	0	5.84873e+07	0	0	1.09692e+08	0	0	6.36424e+07	0	0	3.96067e+07	0	0	9.29342e+07	0	0	3.86991e+07	0	0	1.03716e+08	0	0
Q6PGL7	390	0.970683	15.1995	109.77	K	RPAQAPVSEELPPSPKPGKKIPAGAVSVLLG	ARPAQAPVSEELPPSPK(0.971)PGK(0.029)	6.11465e+06	0	0	1.493e+07	0	0	0	0	0	0	0	0	9.52813e+06	0	0	0	0	0	0	0	0	0	0	0	4.90957e+06	0	0	0	0	0	5.52338e+06	0	0	3.73986e+06	0	0
Q6PIC6	661	0.934354	11.5337	85.925	K	NPRDAKACVIHGTDLKDFTSEQIDEILQNHT	ACVIH(0.066)GTDLK(0.934)DFTSEQIDEILQNHTEIVFAR	2.62038e+07	0	0	2.12601e+07	0	0	5.31038e+06	0	0	5.59989e+07	0	0	0	0	0	1.83852e+07	0	0	0	0	0	5.11289e+07	0	0	1.27998e+07	0	0	8.61236e+07	0	0	5.52934e+07	0	0	3.60807e+07	0	0
Q6PIC6	44	0.903166	9.6984	107.46	K	VAMTEHKMSVEEVCRKYNTDCVQGLTHSKAQ	K(0.903)YNTDCVQGLTHSK(0.097)	3.38813e+06	0	0	0	0	0	4.70894e+06	0	0	0	0	0	7.60015e+06	0	0	0	0	0	0	0	0	0	0	0	0	0	0	6.87241e+06	0	0	0	0	0	6.19802e+06	0	0
Q6PIC6	57	0.998206	27.4551	146.27	K	CRKYNTDCVQGLTHSKAQEILARDGPNALTP	YNTDCVQGLTH(0.002)SK(0.998)AQEILAR	1.01319e+07	0	0	5.53379e+06	0	0	5.09909e+06	0	0	2.19782e+07	0	0	1.99e+07	0	0	1.7247e+07	0	0	0	0	0	5.99866e+06	0	0	7.76448e+06	0	0	1.76544e+07	0	0	1.13868e+07	0	0	1.82435e+07	0	0
Q6PIC6	367	0.999931	41.6347	126.91	K	EAVETLGSTSTICSDKTGTLTQNRMTVAHMW	NLEAVETLGSTSTICSDK(1)TGTLTQNR	0	0	0	3.35969e+06	0	0	0	0	0	0	0	0	8.65504e+06	0	0	6.89041e+06	0	0	0	0	0	0	0	0	5.99145e+06	0	0	1.57994e+07	0	0	0	0	0	1.35066e+07	0	0
Q6PIC6	716	0.569417	1.21374	133.86	K	IVAVTGDGVNDSPALKKADIGIAMGISGSDV;IVAVTGDGVNDSPALKKADIGVAMGIAGSDV;IVAVTGDGVNDSPALKKADIGVAMGIVGSDV	QGAIVAVTGDGVNDSPALK(0.569)K(0.431)	0	0	0	0	0	0	0	0	0	0	0	0	0	0	0	0	0	0	0	0	0	0	0	0	0	0	0	0	0	0	0	0	0	0	0	0
Q6PIE5	59	1	113.04	247.11	K	LSLDELGRKYQVDLSKGLTNQRAQDILARDG	YQVDLSK(1)GLTNQR	0	0	0	0	0	0	0	0	0	2.79522e+07	0	0	1.25701e+07	0	0	1.21046e+07	0	0	0	0	0	0	0	0	0	0	0	2.59706e+07	0	0	1.11098e+07	0	0	1.38355e+07	0	0
Q6PNC0	209	0.598914	1.74127	172.95	K	WYNVENWRPAVTSPDKNSEKQSQGEIDFSFV	VWYNVENWRPAVTSPDK(0.599)NSEK(0.401)	5.79295e+07	0	0	8.60521e+07	0	0	5.69621e+07	0	0	8.22005e+07	0	0	8.40127e+07	0	0	8.3358e+07	0	0	9.27568e+07	0	0	6.44629e+07	0	0	9.92079e+07	0	0	7.25804e+07	0	0	6.38061e+07	0	0	8.03135e+07	0	0
Q6ZPF3	1601	0.82085	8.26096	71.297	K	SDILSDEDEDFHHPLKQGSPTKDIEIQFQRL	ESDILSDEDEDFH(0.123)H(0.053)PLK(0.821)QGSPTK(0.004)DIEIQFQR	0	0	0	2.53768e+07	0	0	0	0	0	0	0	0	0	0	0	0	0	0	3.3479e+07	0	0	0	0	0	0	0	0	0	0	0	0	0	0	0	0	0
Q6ZPF3	1607	1	100.344	109.07	K	EDEDFHHPLKQGSPTKDIEIQFQRLKISEES	QGSPTK(1)DIEIQFQR	4.39765e+06	0	0	9.06192e+06	0	0	5.95243e+06	0	0	0	0	0	0	0	0	0	0	0	0	0	0	0	0	0	0	0	0	0	0	0	0	0	0	0	0	0
Q6ZPJ3	843	1	105.203	127.79	K	QLLTGSPTSPTVEPEKPTREKKFLDDIKKLQ	NMTVEQLLTGSPTSPTVEPEK(1)PTR(1)	9.32993e+06	0	0	9.85786e+06	7.1445e+06	0	1.0454e+07	6.24018e+06	0	6.85283e+06	0	0	7.65579e+06	0	0	6.69505e+06	9.03712e+06	0	1.25658e+07	0	0	0	0	0	1.30427e+07	0	0	0	0	0	0	0	0	1.36497e+07	2.59367e+07	0
Q6ZPQ6	650	0.96531	14.493	113.3	K	PRSNGTEDSRRQLPRKRSDSSTYELDTIQQH	K(0.965)R(0.034)SDSSTYELDTIQQHQAFLSSLHASVLR	8.49263e+06	0	0	9.88976e+06	0	0	1.40723e+08	0	0	2.14527e+07	0	0	2.09591e+07	0	0	2.28951e+07	0	0	8.13019e+07	0	0	3.38466e+07	0	0	1.05019e+08	0	0	4.35113e+07	0	0	5.6666e+07	0	0	1.27296e+07	0	0
Q6ZPR4	213	0.499994	0	55.417	K	LRNLFIPVFLNCWLAKHALENMINDFHRAIL	NLFIPVFLNCWLAK(0.5)H(0.5)ALENMINDFHRAILR	0	0	0	0	0	0	4.30478e+06	0	0	1.37452e+07	0	0	2.3203e+07	0	0	2.38914e+07	0	0	3.97738e+07	0	0	2.99452e+07	0	0	1.29171e+07	0	0	0	0	0	0	0	0	2.96699e+07	0	0
Q7TMM9	122	0.825511	6.81966	58.963	K	TEGAELVDSVLDVVRKESESCDCLQGFQLTH	K(0.826)ESESCDCLQGFQLTH(0.172)SLGGGTGSGMGTLLISK(0.003)	1.25019e+07	0	0	0	0	0	0	0	0	0	0	0	8.16382e+06	0	0	2.40803e+07	0	0	0	0	0	0	0	0	0	0	0	0	0	0	1.48455e+07	0	0	0	0	0
Q7TQD2	14	0.999529	33.2643	164.93	K	__MADSKAKPAKAANKTPPKSPGDPARAAKR	AANK(1)TPPKSPGDPAR	1.0289e+08	0	0	1.21329e+08	0	0	9.46722e+07	0	0	1.13875e+08	0	0	133003766	0	0	0	0	0	5.75297e+07	0	0	9.64369e+07	0	0	9.42851e+07	0	0	0	0	0	6.35983e+07	0	0	0	0	0
Q7TQD2	18	0.773484	5.33352	184	K	DSKAKPAKAANKTPPKSPGDPARAAKRLSLE	AANK(0.227)TPPK(0.773)SPGDPAR	0	0	0	0	0	0	0	0	0	0	0	0	0	0	0	0	0	0	0	0	0	0	0	0	0	0	0	0	0	0	0	0	0	0	0	0
Q7TT37	462	1	72.227	72.227	K	SVYKCGDKPNMDSTVKLGAVGGNGFKVPLTT	PNMDSTVK(1)LGAVGGNGFK(1)VPLTTPH(1)LEK(1)	0	0	0	0	0	0	0	0	0	0	0	0	0	0	0	0	0	0	0	0	0	0	0	0	0	0	0	0	0	0	0	0	0	0	0	0
Q7TT37	472	1	72.227	72.227	K	MDSTVKLGAVGGNGFKVPLTTPHLEKRYSIQ	PNMDSTVK(1)LGAVGGNGFK(1)VPLTTPH(1)LEK(1)	0	0	0	0	0	0	0	0	0	0	0	0	0	0	0	0	0	0	0	0	0	0	0	0	0	0	0	0	0	0	0	0	0	0	0	0
Q80TH2	577	0.988691	19.4185	56.766	K	EAETNGGNLPVTASMKLSGNLKHIVNHDDVF	MSEPEAETNGGNLPVTASMK(0.989)LSGNLK(0.011)	7.97711e+07	0	0	124721020	0	0	1.30654e+08	0	0	7.87009e+07	0	0	1.34881e+08	0	0	7.83415e+07	0	0	8.9869e+07	0	0	1.25666e+08	0	0	1.015e+08	0	0	8.155e+07	0	0	1.37902e+08	0	0	6.56159e+07	0	0
Q80TV8	1327	0.994271	22.3939	131.5	K	NERVEERKGALLELLKITREDSLGVWEEHFK	GALLELLK(0.994)ITR(0.006)	1.58428e+06	0	0	488816	0	0	618555	0	0	8.32686e+06	0	0	2.08677e+06	0	0	0	0	0	0	0	0	4.3999e+06	0	0	0	0	0	0	0	0	0	0	0	0	0	0
Q80TZ3	499	0.462159	0.431339	62.713	K	ELLTLSSPHGNAEGDKPHGAKKPGKKQQEPA	SR(0.004)CEEDH(0.003)AALVNQESEQSDDELLTLSSPH(0.097)GNAEGDK(0.462)PH(0.015)GAK(0.418)	0	0	0	0	0	0	0	0	0	0	0	0	0	0	0	0	0	0	0	0	0	0	0	0	0	0	0	0	0	0	0	0	0	0	0	0
Q80U28	1056	1	75.3846	257.81	K	EIAQTHYYSKEPDKRKRSPTENVNTPVGKDP	K(1)RSPTENVNTPVGK	3.06573e+07	0	0	5.19635e+07	0	0	4.03328e+07	0	0	5.00987e+07	0	0	5.45111e+07	0	0	4.26274e+07	0	0	4.02759e+07	0	0	6.67435e+07	0	0	1.85514e+07	0	0	3.37449e+07	0	0	4.38864e+07	0	0	3.5751e+07	0	0
Q80U28	1111	0.99966	34.6837	134.18	K	SATGKGPKELDTRSLKEENFVASVELWNKHQ	SLK(1)EENFVASVELWNK	1.6586e+07	0	0	1.58504e+07	0	0	2.04786e+07	0	0	1.32455e+07	0	0	6.20246e+06	0	0	1.08465e+07	0	0	5.02404e+07	0	0	4.72683e+07	0	0	27629763	0	0	1.77765e+07	0	0	2.26508e+07	0	0	2.39919e+07	0	0
Q80U44	6	0.995648	24.3884	58.47	K	__________MDSYFKAAVSGLDKLLDDFEQ	DSYFK(0.996)AAVSGLDK(0.004)LLDDFEQNPDK(0.001)	3.05861e+07	0	0	8.33133e+07	0	0	5.11325e+07	0	0	1.51739e+08	0	0	7.38718e+07	0	0	9.01213e+07	0	0	1.43773e+08	0	0	1.42683e+08	0	0	5.12798e+07	0	0	9.48446e+07	0	0	4.98104e+07	0	0	7.30065e+07	0	0
Q80U58	22	0.841311	5.44738	57.53	K	ALALESRGMGELLPTKKFWEPDDSTKDGQKG	NHDFQALALESR(0.714)GMGELLPTK(0.841)K(0.444)	0	0	0	0	0	0	0	1.04502e+07	0	0	0	0	0	0	0	0	0	0	0	0	0	0	1.88386e+07	0	0	0	0	0	0	0	0	0	0	0	1.34276e+07	0
Q80U95	123	1	65.2413	70.728	K	SEDSKRLIWLYQNLIKHSSLFVKQLDGSERL	R(1)LIWLYQNLIK(1)H(1)SSLFVK(1)	0	0	0	0	0	0	0	0	0	0	0	9.9957e+06	0	0	8.24868e+06	0	0	1.07575e+07	0	0	0	0	0	3.27334e+06	0	0	6.43753e+06	0	0	0	0	0	0	0	0	7.51447e+06
Q80UJ7	86	1	145.899	310.46	K	RFSVTHHYLVQESPDKERKDEELEDAIPQSM	FSVTHHYLVQESPDK(1)ER	2.81102e+07	0	0	3.10527e+07	0	0	1.06224e+07	0	0	3.64196e+07	0	0	3.29849e+07	0	0	2.27512e+07	0	0	1.95595e+07	0	0	1.11349e+07	0	0	12885122	0	0	1.22172e+07	0	0	2.42907e+07	0	0	1.13846e+07	0	0
Q80VC9	810	1	148.152	190.57	K	VLTPPHDVDSLPHLRKFSPSQVPVQTRSSIL	K(1)FSPSQVPVQTR	2.47153e+07	0	0	1.13556e+08	0	0	0	0	0	5.51824e+07	0	0	2.77186e+07	0	0	5.87911e+07	0	0	0	0	0	0	0	0	0	0	0	0	0	0	7.73371e+07	0	0	2.32033e+07	0	0
Q80VP1	468	0.999922	41.0707	87.868	K	SPPPAATPTPTPPTRKTPESFLGPNAALVDL	K(1)TPESFLGPNAALVDLDSLVSRPGPTPPGSK	9.97e+06	0	0	0	0	0	3.6227e+06	0	0	0	0	0	4.69585e+06	0	0	1.16339e+07	0	0	0	0	0	0	0	0	0	0	0	0	0	0	0	0	0	0	0	0
Q80W32	261	0.94223	12.1245	87.713	K	LYMKRNAELQISQTQKKCNRAEELLLEEIEK	NAELQISQTQK(0.942)K(0.058)	2.08077e+07	0	0	1.19111e+06	0	0	1.54555e+06	0	0	0	0	0	8.34905e+06	0	0	9.35669e+06	0	0	1.36239e+06	0	0	0	0	0	0	0	0	1.0461e+07	0	0	5.5986e+06	0	0	4.57929e+06	0	0
Q80W93	4824	0.999996	54.0303	87.157	K	VTLKGLDYIDVLSGSKKDYKLNFFSYKEGLY	TDLSVTLKGLDYIDVLSGSK(1)K(1)	0	3.83438e+06	0	0	0	0	0	0	0	0	0	0	0	0	0	0	0	0	0	0	0	0	0	0	0	3.56176e+06	0	0	2.81146e+06	0	0	0	0	0	0	0
Q80XA6	540	0.999996	54.5412	122.39	K	QLNRAPSQAAESSPTKMDAPHAQPPSKPIRR	APSQAAESSPTK(1)MDAPHAQPPSKPIR	1.27614e+08	0	0	1.10654e+08	0	0	1.09712e+08	0	0	1.63063e+08	0	0	9.15523e+07	0	0	1.63037e+08	0	0	1.7171e+08	0	0	2.53387e+08	0	0	8.94453e+07	0	0	1.25056e+08	0	0	1.39295e+08	0	0	1.36931e+08	0	0
Q80XQ2	606	0.999473	32.7812	73.109	K	SNIARSRSHSKTMGRKESEEELEAQISFLQG	K(0.999)ESEEELEAQISFLQGQLNDLDAMCK(0.001)	1.63832e+07	0	0	0	0	0	1.25676e+07	0	0	0	0	0	1.01197e+07	0	0	1.21116e+07	0	0	3.39403e+07	0	0	2.08736e+07	0	0	0	0	0	0	0	0	1.51286e+07	0	0	0	0	0
Q80XU3	184	0.998197	27.433	190.34	K	MPKPRLKATVTPSPVKGKAKVGRPTASKKSK	LKATVTPSPVK(0.998)GK(0.002)	5.62992e+06	0	0	4.71388e+06	0	0	5.87775e+06	0	0	4.32197e+06	0	0	3.52656e+06	0	0	3.306e+06	0	0	5.44326e+06	0	0	3.72805e+06	0	0	4.02021e+06	0	0	3.02693e+06	0	0	4.09312e+06	0	0	2.33643e+06	0	0
Q80Y98	445	0.981677	17.2898	143.43	K	PLGPRKKILNHFSARKNSVSINRPAMSASEV	K(0.982)NSVSINRPAMSASEVNISK(0.018)	5.53208e+07	0	0	7.63794e+07	0	0	4.08738e+07	0	0	8.17369e+07	0	0	1.23441e+08	0	0	112751610	0	0	6.20175e+07	0	0	4.02306e+07	0	0	4.76508e+07	0	0	0	0	0	5.7518e+07	0	0	0	0	0
Q80YA9	342	1	90.2956	222.09	K	TSSVATPSSTISTPTKRDSSALQDLYIPPPP	SPTSSVATPSSTISTPTK(1)R	0	0	0	0	0	0	5.05154e+06	0	0	0	0	0	0	0	0	0	0	0	0	0	0	0	0	0	0	0	0	0	0	0	0	0	0	0	0	0
Q80ZF8	1228	0.998688	28.8151	63.713	K	TGTLSRISLNDDEEEKGTNPEGLSYSTLPGN	ISLNDDEEEK(0.999)GTNPEGLSYSTLPGNVISK(0.001)	0	0	0	1.46211e+08	0	0	1.12849e+08	0	0	6.41581e+07	0	0	5.11216e+07	0	0	0	0	0	0	0	0	0	0	0	9.9042e+07	0	0	3.69329e+07	0	0	1.0438e+08	0	0	6.44427e+07	0	0
Q810U3	1155	0.992101	21.5183	50.898	K	PVREKKDVPLGPEDPKEEDGSFDYSDEDNKP	DVPLGPEDPK(0.992)EEDGSFDYSDEDNK(0.007)PLQGSQTSLDGTIK(0.001)	0	0	0	0	0	0	0	0	0	0	0	0	0	0	0	0	0	0	0	0	0	0	0	0	0	0	0	1.08111e+07	0	0	0	0	0	1.45343e+07	0	0
Q812A2	898	0.876095	8.49476	109.55	K	IDTPPRAAACPSSPHKIPLSRGRIESPEKRR	AAACPSSPH(0.124)K(0.876)IPLSR	4.27178e+07	0	0	0	0	0	0	0	0	0	0	0	2.10203e+07	0	0	1.04108e+07	0	0	0	0	0	0	0	0	0	0	0	3.90628e+07	0	0	4.46394e+07	0	0	0	0	0
Q8BG39	328	0.973485	17.2199	176.4	K	AWMILKQVHDTNMRAKGTPEKVFTVSHIKTP	AK(0.973)GTPEK(0.018)VFTVSHIK(0.008)	3.67115e+07	0	0	3.63488e+07	0	0	3.96598e+07	0	0	3.05237e+07	0	0	1.30262e+07	0	0	3.53934e+07	0	0	4.25073e+07	0	0	3.57944e+07	0	0	0	0	0	0	0	0	0	0	0	2.38874e+07	0	0
Q8BG92	286	0.467031	0	78.752	K	DDDSEYNVDSYNMPVKDVDKELSPKSMKRSQ	TLLDHEYDDDSEYNVDSYNMPVK(0.467)DVDK(0.467)ELSPK(0.066)	0	0	0	0	0	0	0	0	0	0	0	0	0	0	0	0	0	0	0	0	0	0	0	0	0	0	0	0	0	0	0	0	0	0	0	0
Q8BG92	290	0.891773	9.82073	88.278	K	EYNVDSYNMPVKDVDKELSPKSMKRSQSVVD	TLLDHEYDDDSEYNVDSYNMPVK(0.093)DVDK(0.892)ELSPK(0.015)	1.13526e+07	0	0	1.32268e+07	0	0	0	0	0	0	0	0	0	0	0	1.30219e+07	0	0	0	0	0	0	0	0	1.18117e+07	0	0	0	0	0	0	0	0	1.75261e+07	0	0
Q8BGD9	92	1	68.9385	125.78	K	PRAAREPNIDRSRLPKSPPYTAFLGNLPYDV	LPK(1)SPPYTAFLGNLPYDVTEDSIKDFFR	5.78417e+07	0	0	6.67238e+07	0	0	5.52531e+07	0	0	4.72482e+07	0	0	6.36076e+07	0	0	5.58272e+07	0	0	8.62152e+07	0	0	6.56627e+07	0	0	5.85159e+07	0	0	4.50716e+07	0	0	7.24328e+07	0	0	6.23819e+07	0	0
Q8BGD9	113	1	89.5459	95.206	K	AFLGNLPYDVTEDSIKDFFRGLNISAVRLPR	SPPYTAFLGNLPYDVTEDSIK(1)DFFR	5.43845e+07	0	0	9.29689e+07	0	0	8.72567e+07	0	0	9.00317e+07	0	0	7.98112e+07	0	0	7.78479e+07	0	0	5.41268e+07	0	0	1.03533e+08	0	0	9.17852e+07	0	0	5.7771e+07	0	0	8.06812e+07	0	0	8.92905e+07	0	0
Q8BGU5	97	1	76.8675	197.47	K	KSLFINHHPPGQTSRKYSSCSTIFLDDSTVS	K(1)YSSCSTIFLDDSTVSQPNLK	1.55114e+07	0	0	1.86e+07	0	0	1.18051e+07	0	0	1.90976e+07	0	0	1.17321e+07	0	0	1.37205e+07	0	0	0	0	0	2.05782e+07	0	0	1.34959e+07	0	0	7.34113e+06	0	0	1.08819e+07	0	0	9.59614e+06	0	0
Q8BHZ0	6	0.559513	0	59.228	K	__________MGNLLKVLTREIENYPHFFLD	MGNLLK(0.56)VLTR(0.56)EIENYPH(0.881)FFLDFENAQPTEGER	0	0	0	0	0	0	0	0	0	0	0	0	0	0	0	0	0	0	0	0	0	0	0	0	0	0	0	0	0	0	0	0	0	0	0	0
Q8BI84	1671	1	108.57	108.57	K	MTQKMAMRQDEPVIVKPMPGRPNTQNPPRRG	QDEPVIVK(1)PMPGR(1)	0	0	0	0	0	0	0	0	0	0	0	0	0	0	0	0	0	0	0	0	0	0	0	0	0	0	0	0	0	0	0	0	0	0	0	0
Q8BJH1	217	1	140.638	235.79	K	VPTGKASSVNSPLGNKPQTLSPSHRAIAAPQ	ASSVNSPLGNK(1)PQTLSPSHR	3.25838e+06	0	0	1.77971e+07	0	0	5.90608e+06	0	0	3.33983e+06	0	0	1.01768e+07	0	0	1.64086e+07	0	0	0	0	0	0	0	0	2.5756e+06	0	0	7.85246e+06	0	0	4.59442e+06	0	0	6.64796e+06	0	0
Q8BR63	76	0.999963	46.7709	69.619	K	MEEYSTDEDEVDGLDKKDVLPTVDPTKLTWG	RVIHFVSGETMEEYSTDEDEVDGLDK(1)K(1)	0	0	0	0	0	0	0	0	0	0	5.79977e+06	0	0	1.29495e+07	0	0	7.59632e+06	0	0	0	0	0	0	0	0	0	0	0	0	0	0	0	0	0	0	0
Q8BRT1	13	0.999997	57.7383	88.09	K	___MRRLICKRICDYKSFDDEESVDGNRPSS	ICDYK(1)SFDDEESVDGNRPSSAASAFK	1.04371e+07	0	0	0	0	0	0	0	0	0	0	0	43601572	0	0	1.90807e+07	0	0	0	0	0	7.39589e+06	0	0	0	0	0	2.43002e+07	0	0	0	0	0	4.81471e+07	0	0
Q8BSE0	119	1	100.047	199.19	K	EECIQDEFGGKVTVHKISPQHRARKKKGTTV	VTVHK(1)ISPQHR	0	0	0	0	0	0	0	0	0	9.86433e+06	0	0	0	0	0	5.45171e+06	0	0	0	0	0	0	0	0	0	0	0	0	0	0	0	0	0	0	0	0
Q8BTM8	2165	0.556696	1.05174	74.81	K	APSVANIGSHCDLSLKIPEISIQDMTAQVTS	R(0.005)APSVANIGSH(0.437)CDLSLK(0.557)IPEISIQDMTAQVTSPSGK(0.001)	7.84909e+06	0	0	0	0	0	0	0	0	0	0	0	1.12229e+07	0	0	1.24394e+07	0	0	0	0	0	0	0	0	0	0	0	0	0	0	1.94289e+07	0	0	0	0	0
Q8BUM6	83	0.998903	29.5918	86.869	K	NGPALYPAATTSFSQKSPQARALCRSCSHYE	NLVLTNGPALYPAATTSFSQK(0.999)SPQAR(0.001)	1.1509e+07	0	0	1.55897e+07	0	0	1.10397e+07	0	0	0	0	0	0	0	0	0	0	0	0	0	0	0	0	0	8.70343e+06	0	0	0	0	0	0	0	0	0	0	0
Q8BUV3	177	0.999417	33.8005	83.724	K	LPHAIDLLRDAIVKVKEVHDELEDLPSPPPP	VK(0.999)EVHDELEDLPSPPPPLSPPPTTSPHK	1.67991e+07	3.4284e+07	1.65417e+07	1.92886e+07	0	1.81503e+07	2.09422e+07	4.69963e+07	2.26459e+07	3.79239e+07	6.12767e+07	2.0838e+07	2.9056e+07	7.62169e+07	1.86809e+07	2.5863e+07	6.28283e+07	1.47348e+07	8.64875e+07	9.74318e+07	4.29992e+07	5.90472e+07	8.14063e+07	1.30731e+07	7.13596e+07	7.74375e+07	3.77259e+07	4.38586e+07	7.65148e+07	3.76658e+07	4.83707e+07	7.12226e+07	0	2.20239e+07	3.94154e+07	2.13769e+07
Q8BVI5	77	0.982804	17.5713	105.01	K	LDPEAAIGVTKRSPPKWVDGVDEIQYDVGRI	R(0.017)SPPK(0.983)WVDGVDEIQYDVGR	1.18909e+07	0	0	4.9136e+06	0	0	4.48335e+06	0	0	5.31278e+06	0	0	6.56541e+06	0	0	5.41484e+06	0	0	0	0	0	0	0	0	0	0	0	9.40634e+06	0	0	4.09215e+06	0	0	0	0	0
Q8BYI8	72	0.734692	4.44506	54.562	K	DLPEPDSDADVAGAAKPHLSEVTPEGFPSEP	SALGDLPEPDSDADVAGAAK(0.735)PH(0.264)LSEVTPEGFPSEPLGGLEQK(0.001)	0	0	0	0	0	0	0	0	0	0	0	0	0	0	0	0	0	0	1.08603e+07	0	0	0	0	0	0	0	0	0	0	0	0	0	0	1.94848e+07	0	0
Q8BZ60	272	0.968673	14.9045	144.43	K	ATAAPDVPFNSTGSFKRDRPKSTLMNLPKVQ	KPNTPSAATAAPDVPFNSTGSFK(0.969)R(0.031)	1.33635e+07	0	0	1.03379e+07	0	0	1.13505e+07	0	0	1.8227e+07	0	0	2.23707e+07	0	0	2.55502e+07	0	0	6.04006e+06	0	0	1.06125e+07	0	0	1.33128e+07	0	0	0	0	0	2.5708e+07	0	0	2.57262e+07	0	0
Q8C078	493	0.999706	35.3106	139.74	K	IPSLATVILVKTMIRKRSFGNPFEGSRREER	K(1)RSFGNPFEGSR	4.40021e+07	0	0	0	0	0	6.95579e+07	0	0	5.93938e+07	0	0	2.27412e+07	0	0	3.44231e+07	0	0	1.05193e+08	0	0	8.98554e+07	0	0	0	0	0	3.71296e+07	0	0	4.2773e+07	0	0	2.4878e+07	0	0
Q8C0D5	8	1	65.2394	96.171	K	________MVLSGVDKMIRLQKNTANIRNIC	MVLSGVDK(1)MIR(1)LQK	0	0	0	0	2.44945e+07	0	0	9.66844e+06	0	0	2.1427e+07	0	0	1.62061e+07	0	0	0	0	0	1.00002e+07	0	0	11571183	0	0	3.0395e+07	0	0	1.06754e+07	0	0	1.66382e+07	0	0	1.81529e+07	0
Q8C0E2	301	0.999999	62.0722	177.36	K	KQQEVVLWRKGDIVRKSMSHQAAIASQRFEG	K(1)SMSHQAAIASQR	0	0	0	1.96504e+07	0	0	1.29044e+07	0	0	2.25199e+07	0	0	1.82174e+07	0	0	1.33047e+07	0	0	0	0	0	0	0	0	9.02036e+06	0	0	1.7714e+07	0	0	0	0	0	1.43663e+07	0	0
Q8C0T5	1424	0.820397	6.59718	98.151	K	HSASPVVFSSARSSPKEELHPTASSQLAPSF	SSPK(0.82)EELH(0.18)PTASSQLAPSFSSSSSSSSGPR	7.60137e+06	0	0	153314267	0	0	0	0	0	0	0	0	0	0	0	6.19629e+07	0	0	1.71001e+08	0	0	1.34251e+08	0	0	1.5077e+08	0	0	0	0	0	8.72352e+07	0	0	2.99028e+07	0	0
Q8C167	131	0.994762	22.7858	88.087	K	GGFVYYQEGCCLVRSKDEEADSDNYEVLFNL	SK(0.995)DEEADSDNYEVLFNLEELK(0.005)LDQPFIDCIR	2.45866e+07	0	0	1.67226e+07	0	0	2.70028e+07	0	0	3.9399e+07	0	0	6.08407e+07	0	0	6.49309e+07	0	0	4.12989e+07	0	0	4.94499e+07	0	0	4.42096e+07	0	0	6.29014e+07	0	0	4.08418e+07	0	0	9.24479e+07	0	0
Q8C167	150	0.580508	1.41096	56.952	K	ADSDNYEVLFNLEELKLDQPFIDCIRVAPDE	SK(0.419)DEEADSDNYEVLFNLEELK(0.581)LDQPFIDCIR	0	0	0	0	0	0	0	0	0	0	0	0	0	0	0	0	0	0	0	0	0	0	0	0	0	0	0	2.15192e+07	0	0	0	0	0	0	0	0
Q8C3J5	458	0.996294	24.3886	59.046	K	QRNVEVIMCVCTEDGKVLPNAICVGAGDKAM	TTQRNVEVIMCVCTEDGK(0.996)VLPNAICVGAGDK(0.004)	4.62746e+06	0	0	0	0	0	3.77273e+06	0	0	7.32051e+06	0	0	3.37332e+06	0	0	0	0	0	3.12845e+07	0	0	9.46996e+06	0	0	2.97055e+06	0	0	0	0	0	0	0	0	0	0	0
Q8C419	719	0.526528	0.493326	72.725	K	WSEHSLDPEDIRDELKKLYAQLEIYKRKKMI	SGSYLNSSINSAWSEH(0.003)SLDPEDIR(0.001)DELK(0.527)K(0.47)	0	0	0	0	0	0	0	0	0	0	0	0	0	0	0	0	0	0	0	0	0	0	0	0	0	0	0	0	0	0	3.12052e+07	0	0	0	0	0
Q8C419	1062	1	71.6897	88	K	KATEGLYQANHKSIDKTEVCPWEIHSQSLLE	SIDK(1)TEVCPWEIHSQSLLEDENR	1.19643e+07	0	0	1.08507e+07	0	0	5.69755e+06	0	0	0	0	0	9.05323e+06	0	0	0	0	0	0	0	0	0	0	0	0	0	0	0	0	0	0	0	0	1.19046e+07	0	0
Q8C5W3	16	1	86.0404	148.7	K	MDQPSGRSFMQVLCEKYSPENFPYRRGPGVG	SFMQVLCEK(1)YSPENFPYR	4.06716e+06	0	0	0	0	0	1.03302e+07	0	0	0	0	0	4.19182e+06	0	0	8.58043e+06	0	0	0	0	0	0	0	0	0	0	0	0	0	0	0	0	0	7.12041e+06	0	0
Q8C7R7	167	0.995623	23.5692	88.803	K	CRKEKLEPACAATFGKTIRQKFPLLTTRRLG	LEPACAATFGK(0.996)TIR(0.004)	1734024999	0	0	8.83862e+08	0	0	736017998	0	0	1585127881	0	0	2056662529	0	0	9.3521e+08	0	0	5.56257e+08	0	0	214655716	0	0	9.15127e+08	0	0	3.72667e+06	0	0	2285780132	0	0	3.7572e+08	0	0
Q8C8R3	3738	0.999847	38.1758	72.009	K	VEDPQKATAVPDSLCKTPEDISTPPEGTKPC	ATAVPDSLCK(1)TPEDISTPPEGTKPCLQTPVTSER	1.54636e+07	0	0	1.8372e+07	0	0	1.35618e+07	3.61615e+07	0	0	8.63741e+07	0	1.91028e+07	8.939e+07	0	2.55732e+07	0	0	0	0	0	0	0	0	0	113425328	0	6.36542e+06	0	0	2.68401e+07	0	0	2.92798e+07	0	0
Q8C8R3	3751	1	96.7211	149.44	K	LCKTPEDISTPPEGTKPCLQTPVTSERGSPI	TPEDISTPPEGTK(1)PCLQTPVTSER	4.73589e+07	0	0	0	0	0	3.3518e+07	3.61615e+07	0	3.07993e+07	8.63741e+07	0	2.82368e+07	8.939e+07	0	0	0	0	4.07809e+07	0	0	3.70598e+07	0	0	4.10782e+07	113425328	0	3.31107e+07	0	0	6.04949e+07	0	0	0	0	0
Q8C8R3	1424	1	66.5539	110.44	K	HQAICNLNITLPIYAKESESDQEPEEEIGMT	GLVHQAICNLNITLPIYAK(1)ESESDQEPEEEIGMTSEK(1)	1.30216e+07	5.12035e+07	0	0	41933650	0	4.22235e+07	5.91956e+07	0	2.99218e+07	3.60942e+07	0	4.11047e+07	3.45075e+07	0	3.03989e+07	5.68285e+07	0	1.26327e+08	0	0	7.17745e+07	5.28759e+07	0	7.117e+07	1.63317e+07	0	1.5168e+07	7.28361e+07	0	4.81637e+07	7.70988e+07	0	3.46196e+07	5.79924e+07	0
Q8C8R3	832	0.996275	24.3685	113.78	K	TEEVTTTTTTITEKHKLNVPETMTEVLDVSD	HK(0.996)LNVPETMTEVLDVSDEEGDDTVTGDGGEYLRPEDLK(0.004)	5.42593e+08	0	0	0	0	0	3.86164e+07	0	0	4.25817e+07	0	0	4.32997e+08	0	0	4.04859e+08	0	0	9.79027e+07	0	0	0	0	0	0	0	0	5.15726e+07	0	0	3.09282e+07	0	0	3.37118e+07	0	0
Q8C8R3	1908	0.831541	7.08939	159.01	K	TEKHLPGSPSIRTPEKPAPGSATGKHEKHLP	HLPGSPSIR(0.006)TPEK(0.832)PAPGSATGK(0.163)	0	0	0	0	0	0	0	0	0	0	0	0	0	0	0	0	0	0	0	0	0	0	0	0	0	0	0	0	0	0	0	0	0	0	0	0
Q8C8R3	1834	0.889168	9.06546	289.32	K	SPSAKTERHSPVFSGKPEKHSPGSPSTKNER	HSPVFSGK(0.889)PEK(0.11)HSPGSPSTK(0.001)	3.73142e+06	0	0	6.14362e+06	0	0	4.24151e+06	0	0	7.33828e+06	0	0	4.70148e+06	0	0	0	0	0	0	0	0	5.2744e+06	0	0	4.71864e+06	0	0	2.74634e+06	0	0	0	0	0	0	0	0
Q8C8R3	1837	0.942718	12.1741	260.44	K	AKTERHSPVFSGKPEKHSPGSPSTKNERHSP	HSPVFSGKPEK(0.943)H(0.057)SPGSPSTK	1.90515e+07	0	0	0	0	0	2.16375e+07	0	0	0	0	0	2.62646e+07	0	0	0	0	0	0	0	0	3.12258e+07	0	0	0	0	0	1.67666e+07	0	0	3.85866e+06	0	0	2.59908e+07	0	0
Q8C8R3	3784	1	170.751	195.94	K	EPEEASEPKEESSPRKTSLVIVESTDDQSQV	K(1)TSLVIVESTDDQSQVFER	0	0	0	6.02232e+06	0	0	4.63136e+06	0	0	4.36146e+06	0	0	0	0	0	0	0	0	0	0	0	0	0	0	0	0	0	0	0	0	0	0	0	0	0	0
Q8C8R3	2357	0.499998	0	71.527	K	PPSDASVKTAEGTEPKPQGAIRSPQGLELPL	TAEGTEPK(0.5)PQGAIR(0.5)SPQGLELPLPNR	3.06989e+07	0	0	0	0	0	0	0	0	0	0	0	0	0	0	0	0	0	0	0	0	0	0	0	0	0	0	0	0	0	0	0	0	1.03251e+07	0	0
Q8CA95	778	0.996956	25.5421	202.32	K	EETAMWISGPGPAPSKSTPEKLNVKVED___	GEETAMWISGPGPAPSK(0.997)STPEK(0.003)LNVK	7.24292e+07	0	0	0	0	0	2.599e+07	0	0	4.60341e+07	0	0	2.36469e+07	0	0	0	0	0	2.20264e+08	0	0	1.40963e+08	0	0	1.5747e+08	0	0	1.01478e+07	0	0	9.63288e+07	0	0	0	0	0
Q8CBW3	180	1	95.2489	174.24	K	PARTGTLSRTNPPTQKPPSPPVSGRGTLGRN	TNPPTQK(1)PPSPPVSGR	4.58158e+07	0	0	8.17961e+07	0	0	7.12221e+07	0	0	4.17378e+07	0	0	6.94361e+07	0	0	3.79696e+07	0	0	6.90924e+07	0	0	7.1418e+07	0	0	6.89011e+07	0	0	3.6112e+07	0	0	5.23545e+07	0	0	3.19544e+07	0	0
Q8CC35	219	0.997565	27.4599	91.166	K	IGHAPGPSVKPTSPSKPGSPKHPSPQSPSRG	PLSPIGHAPGPSVK(0.002)PTSPSK(0.998)PGSPK(0.001)	7.38132e+06	0	0	1.02811e+07	0	0	0	0	0	0	0	0	0	0	0	0	0	0	5.99921e+06	0	0	4.7412e+06	0	0	0	0	0	0	0	0	0	0	0	0	0	0
Q8CC35	581	0.900109	9.5486	170.02	K	RSPPSYSTLYPSSDPKPSHLKGQVAPANKTG	VRSPPSYSTLYPSSDPK(0.9)PSHLK(0.1)	0	0	0	0	0	0	1.58706e+07	0	0	0	0	0	0	0	0	0	0	0	0	0	0	9.45637e+06	0	0	0	0	0	0	0	0	0	0	0	0	0	0
Q8CDA1	939	0.5	0	88.951	K	AGPGSELGKGLESPLKKSPSADSIHTRTGFT	GLESPLK(0.5)K(0.5)SPSADSIHTR	0	0	0	0	0	0	0	0	0	0	0	0	0	0	0	0	0	0	0	0	0	0	0	0	0	0	0	2.29594e+07	0	0	0	0	0	2.31654e+07	0	0
Q8CDA1	940	0.893924	9.25682	156.11	K	GPGSELGKGLESPLKKSPSADSIHTRTGFTK	GLESPLK(0.106)K(0.894)SPSADSIHTR	0	0	0	0	0	0	1.01566e+07	0	0	9.9957e+06	0	0	7.23908e+06	0	0	9.24677e+06	0	0	0	0	0	0	0	0	0	0	0	0	0	0	9.20985e+06	0	0	7.85335e+06	0	0
Q8CFI0	500	0.999897	41.6496	78.272	K	APLEGAKDSPIRRAVKDTLSNPQSPQPSPYN	AVK(1)DTLSNPQSPQPSPYNSPKPQHK	1.09644e+07	0	0	7.24884e+06	0	0	4.90368e+06	0	0	1.12681e+07	0	0	1.93198e+07	0	0	1.41052e+07	0	0	9.14916e+06	0	0	0	0	0	8.52512e+06	0	0	3.65466e+07	0	0	1.08595e+07	0	0	1.91327e+07	0	0
Q8CFI0	518	0.849672	7.52212	162.98	K	LSNPQSPQPSPYNSPKPQHKVTQSFLPPGWE	DTLSNPQSPQPSPYNSPK(0.85)PQHK(0.15)	0	0	0	0	0	0	1.31623e+07	0	0	2.29535e+07	0	0	1.34774e+07	0	0	1.80844e+07	0	0	0	0	0	1.59825e+07	0	0	1.56522e+07	0	0	0	0	0	4.02132e+07	0	0	0	0	0
Q8CGF6	337	0.997641	26.2802	92.416	K	CGLTSHDKRISDLGNKTSPMSHSFANFHYPG	ISDLGNK(0.998)TSPMSH(0.002)SFANFHYPGVQNLSR	3.46452e+07	0	0	3.99387e+07	0	0	5.97881e+07	0	0	6.42079e+07	0	0	3.55267e+07	0	0	3.76278e+07	0	0	9.92927e+06	0	0	3.06967e+07	0	0	0	0	0	5.35057e+07	0	0	7.64806e+07	0	0	4.87283e+07	0	0
Q8CH25	551	0.999967	44.8056	151.49	K	SESLKKSEEKKRISSKSPGHMVILNQTKGDH	ISSK(1)SPGHMVILNQTK	1.60725e+07	0	0	0	0	0	6.4101e+07	0	0	5.36086e+07	0	0	3.36785e+07	0	0	7.02522e+06	0	0	0	0	0	0	0	0	1.51741e+07	0	0	4.21776e+07	0	0	7.61529e+06	0	0	1.49893e+07	0	0
Q8CHG3	646	0.999999	58.7471	122.28	K	QHNSELRQRVSELTGKLDELVREKSQNDQSI	VSELTGK(1)LDELVR	0	0	0	2.14936e+07	0	0	1.83904e+07	0	0	8.4511e+06	0	0	4.48068e+06	0	0	2.96484e+06	0	0	2.64824e+06	0	0	5.57394e+06	0	0	8.4641e+06	0	0	0	0	0	4.5802e+06	0	0	3.39695e+06	0	0
Q8CHU3	458	1	175.521	221.51	K	SPDLFESQSLTSASSKPSSARKTPESFLGPN	TTSPDLFESQSLTSASSK(1)PSSAR	8.53969e+07	0	0	6.43126e+07	0	0	6.89401e+07	0	0	4.9708e+07	0	0	6.38043e+07	0	0	5.91429e+07	0	0	8.50408e+07	0	0	9.25208e+07	0	0	5.76546e+07	0	0	3.91267e+07	0	0	8.94397e+06	0	0	4.32793e+07	0	0
Q8CI71	14	1	115.909	130.38	K	__MQKIKSLMTRQGLKSPPESLNDLGAFESL	QGLK(1)SPPESLNDLGAFESLR	1.78108e+07	0	0	1.48343e+07	0	0	1.14966e+07	0	0	2.25543e+07	0	0	2.20696e+07	0	0	1.89938e+07	0	0	0	0	0	5.98564e+07	0	0	0	0	0	0	0	0	1.95853e+07	0	0	1.54389e+07	0	0
Q8CIB9	333	1	70.0893	95.401	K	PESVYPIFNVSSVNTKRPEEQSSVGSTACTN	TISPESVYPIFNVSSVNTK(1)R(1)	0	3.90891e+07	0	0	9.29611e+07	0	0	1.09101e+08	0	0	1.12965e+08	0	0	8.7195e+07	0	0	9.73014e+07	0	0	1.75937e+08	0	0	1.98788e+08	0	0	1.72191e+08	0	0	2.57945e+08	0	0	1.68497e+08	0	0	1.3488e+08	0
Q8CJ19	1368	0.999999	62.5176	138.46	K	SPASKPISLKSYSVDKSPQDEGLCLLKPPSV	SYSVDK(1)SPQDEGLCLLKPPSVPK	3.07535e+07	0	0	4.80779e+07	0	0	0	0	0	4.83815e+07	0	0	4.60617e+07	0	0	3.72661e+07	0	0	4.06056e+07	0	0	2.71869e+07	0	0	5.20956e+07	0	0	3.25845e+07	0	0	4.72871e+07	0	0	5.25984e+07	0	0
Q8CJ19	1379	0.576361	2.42091	119.45	K	YSVDKSPQDEGLCLLKPPSVPKRLGLPKSAG	SYSVDK(0.094)SPQDEGLCLLK(0.576)PPSVPK(0.33)	0	0	0	0	0	0	2.76564e+07	0	0	0	0	0	0	0	0	0	0	0	0	0	0	0	0	0	0	0	0	0	0	0	0	0	0	0	0	0
Q8CJ19	1186	1	109.589	117.27	K	SPGTEEAKSPLATKVKSPEEPLFPTPLLLRE	VK(1)SPEEPLFPTPLLLR	3.8112e+07	0	0	1.40087e+07	0	0	1.07491e+07	0	0	1.07289e+07	0	0	1.10483e+07	0	0	2.76108e+07	0	0	5.75127e+07	0	0	4.99852e+07	0	0	2.85225e+07	0	0	2.52419e+07	0	0	3.20066e+07	0	0	4.24745e+07	0	0
Q8JZK9	498	0.941272	12.4406	104.84	K	LVHSNTATEHIPSPAKKVPRLPATSAESESA	RPFTNDHSLDEGMGLVHSNTATEH(0.005)IPSPAK(0.941)K(0.054)	9.6939e+07	0	0	1.74329e+08	0	0	1.63781e+08	0	0	0	0	0	179840675	0	0	7.07368e+07	0	0	75106391	0	0	7.20971e+07	0	0	2.57886e+08	0	0	8.24306e+07	0	0	9.46307e+07	0	0	1.54854e+07	0	0
Q8JZM4	726	0.990638	20.2456	131.32	K	YDVTPIAYEDYSPDDKPLVTLIKTKDL____	SRPAMYDVTPIAYEDYSPDDK(0.991)PLVTLIK(0.009)	1.78295e+07	0	0	3.73369e+07	0	0	5.95452e+07	0	0	3.35125e+07	0	0	2.76836e+07	0	0	2.63047e+07	0	0	3.41383e+07	0	0	8.19666e+07	0	0	5.10772e+07	0	0	1.5413e+07	0	0	0	0	0	6.566e+07	0	0
Q8JZW4	102	0.758084	7.97099	53.236	K	EEKQNLRFDLYDVDSKSPDLSKHDFLGQAFC	FDLYDVDSK(0.758)SPDLSK(0.121)H(0.121)DFLGQAFCTLGEIVGSSGSR	1.44865e+07	0	0	5.62085e+06	0	0	1.64318e+07	0	0	1.7462e+07	0	0	2.96394e+06	0	0	7.9171e+06	0	0	1.40596e+07	0	0	0	0	0	2.30701e+07	0	0	8.40356e+06	0	0	1.11947e+07	0	0	0	0	0
Q8K039	52	0.880659	8.78571	65.854	K	KIQPQLPDEDGNHSDKEDEQPQVVVLKKGDL	K(0.001)IQPQLPDEDGNH(0.116)SDK(0.881)EDEQPQVVVLK(0.002)	1.02883e+07	0	0	0	0	0	0	0	0	0	0	0	0	0	0	0	0	0	0	0	0	0	0	0	0	0	0	0	0	0	0	0	0	0	0	0
Q8K0T0	491	1	98.2749	222.64	K	ASEESPKREQDSPPMKPGALDAIREETGSRA	REQDSPPMK(1)PGALDAIR	0	0	0	1.94831e+07	0	0	2.2985e+07	0	0	2.37477e+07	0	0	2.14201e+07	0	0	0	0	0	3.05747e+07	0	0	4.7562e+07	0	0	4.70448e+07	0	0	1.57916e+07	0	0	0	0	0	0	0	0
Q8K0T0	556	0.999983	47.5703	99.997	K	GDGASVPEPPRSQQQKPEEEAVSSSQSPTAT	SQQQK(1)PEEEAVSSSQSPTATEIPGPLGSGLMPPLPFFNK	1.20065e+08	0	0	9.62445e+07	0	0	9.1937e+07	0	0	1.07221e+08	0	0	1.01679e+08	0	0	8.38027e+07	0	0	1.43019e+08	0	0	2.05199e+08	0	0	1.93535e+08	0	0	1.39536e+08	0	0	1.16356e+08	0	0	1.5798e+08	0	0
Q8K1M6	614	0.935662	11.8676	121.09	K	LKTSKAEELLAEEKSKPIPIMPASPQKGHAV	SK(0.936)PIPIMPASPQK(0.061)GH(0.003)AVNLLDVPVPVAR	0	0	0	0	0	0	0	0	0	4.73735e+06	0	0	0	0	0	0	0	0	0	0	0	0	0	0	0	0	0	0	0	0	0	0	0	1.39229e+07	0	0
Q8K212	394	0.53215	0.559272	90.773	K	SGPEMEETESILSTPKPKLKPFFEGMSQSSS	EVEEDLDELYDSLEMYNPSDSGPEMEETESILSTPK(0.532)PK(0.468)	0	0	0	0	0	0	0	0	0	0	0	0	0	0	0	0	0	0	0	0	0	0	0	0	0	0	0	0	0	0	1.61936e+07	0	0	1.18249e+07	0	0
Q8K2F8	191	1	66.5568	86.869	K	QLAQGRSSPQLDPLRKSPTMEQAVQTASAHL	SSPQLDPLR(1)K(1)SPTMEQAVQTASAHLPAPAPVGR	0	5.26754e+07	0	1.67311e+07	1.08973e+08	0	0	7.27753e+07	0	0	1.03211e+08	0	9.98507e+06	1.10393e+08	0	0	1.49026e+08	0	0	6.86612e+07	0	0	6.63021e+07	0	1.23798e+07	4.62712e+07	0	7.70901e+06	9.45605e+07	0	0	1.43838e+08	0	0	1.37426e+08	0
Q8K2I1	418	0.999988	49.0952	61.283	K	IGPEKVIQATTHFLQKPVPGFEECEDEVTSD	VIQATTHFLQK(1)PVPGFEECEDEVTSDPATD	5.55014e+07	0	0	5.3297e+07	0	0	4.8378e+07	0	0	9.99398e+07	0	0	9.02059e+07	0	0	8.29893e+07	0	0	5.95212e+07	0	0	4.85574e+07	0	0	5.79004e+07	0	0	7.50092e+07	0	0	8.01971e+07	0	0	7.94854e+07	0	0
Q8K2L8	308	1	128.956	213.01	K	PVPEKLSSLTAPVGEKSPDSTSPSYSTRMDR	LSSLTAPVGEK(1)SPDSTSPSYSTR	0	0	0	1.3892e+07	0	0	2.07544e+07	0	0	1.99991e+07	0	0	1.99865e+07	0	0	2.5947e+07	0	0	1.55183e+07	0	0	0	0	0	2.85598e+07	0	0	1.74193e+07	0	0	0	0	0	0	0	0
Q8K3E5	100	0.898902	12.0829	77.641	K	SEKRKKKKKKVPVPTKPESSPSDVCDSAVEG	K(0.045)VPVPTK(0.899)PESSPSDVCDSAVEGEQK(0.056)	0	0	0	0	0	0	0	0	0	0	0	0	0	0	0	0	0	0	0	0	0	0	0	0	0	0	0	0	0	0	0	0	0	1.01487e+07	0	0
Q8K3I9	244	0.480889	0	106.74	K	QQLQRSKQSSRHSKEKDRQSPLHGNHITISH	EK(0.481)DR(0.481)QSPLH(0.038)GNHITISHTQAIGSR	0	0	0	0	0	0	0	0	0	0	0	0	0	0	0	0	0	0	0	0	0	0	0	0	0	0	0	0	0	0	0	0	0	0	0	0
Q8K400	758	0.998444	28.9016	153.48	K	KFSKMVANDLAKMSRKLSLPTDLKPDLDVKD	K(0.998)LSLPTDLK(0.001)PDLDVK	1.12384e+08	0	0	1.02694e+08	0	0	8.04226e+07	0	0	9.04782e+07	0	0	1.08688e+08	0	0	8.93249e+07	0	0	2.16633e+08	0	0	1.37635e+08	0	0	1.21115e+08	0	0	8.41848e+07	0	0	9.90175e+07	0	0	1.14651e+08	0	0
Q8K596	633	0.626961	2.25485	189.33	K	KRGISALLLNQGNGDKKITAEQEEAQRIAEM	RGISALLLNQGNGDK(0.627)K(0.373)	1.34486e+07	0	0	0	0	0	1.35849e+07	0	0	6.88426e+06	0	0	7.68223e+06	0	0	7.70944e+06	0	0	1.63756e+07	0	0	1.04094e+07	0	0	7.37054e+06	0	0	4.61965e+06	0	0	0	0	0	0	0	0
Q8R3Q2	818	0.936892	11.7244	76.051	K	KAAGAVEAVCTGHTGKVSPPPRTAEAAVGRA	AAGAVEAVCTGH(0.063)TGK(0.937)VSPPPR	1.03963e+07	0	0	1.65701e+07	0	0	1.97654e+07	0	0	1.32841e+07	0	0	7.68019e+06	0	0	1.1474e+07	0	0	0	0	0	1.45077e+07	0	0	6.83976e+06	0	0	0	0	0	4.4588e+06	0	0	0	0	0
Q8R3Z5	215	0.588505	1.55386	73.459	K	GTRRPTPPASAKQKQKSTEHVPPYDVVPSMR	QK(0.589)STEH(0.411)VPPYDVVPSMRPIILVGPSLK	0	0	0	0	0	0	0	0	0	2.20486e+07	0	0	0	0	0	5.27993e+07	0	0	0	0	0	0	0	0	0	0	0	1.1887e+07	0	0	0	0	0	0	0	0
Q8R550	560	0.996845	25.2123	93.889	K	LSSPDIFDSPSPEEDKEEHISLAHRGIDVSK	RPPSQSLTSSSLSSPDIFDSPSPEEDK(0.997)EEH(0.003)ISLAHR	4.1455e+07	2.53554e+07	0	4.61336e+07	3.62197e+07	0	2.55666e+07	1.76213e+07	0	5.84116e+07	3.779e+07	0	1.11356e+08	3.72884e+07	0	9.95608e+07	3.55563e+07	0	4.11905e+07	5.01439e+07	0	5.6015e+07	4.85987e+07	0	4.81887e+07	0	0	9.59454e+07	3.49586e+07	0	8.53658e+07	0	0	9.10782e+07	5.05585e+07	0
Q8VBT9	189	1	88.2707	94.523	K	QCDTAGKQESIAVRSKAPGSPVSSLSADQAS	SK(1)APGSPVSSLSADQASSSTLLPLNSGEFSR	1.37385e+07	0	0	2.24187e+07	0	0	1.43816e+07	0	0	1.48399e+07	0	0	2.41806e+07	0	0	2.75748e+07	0	0	0	0	0	2.03139e+07	0	0	1.68701e+07	0	0	1.19729e+07	0	0	2.13303e+07	0	0	1.59992e+07	0	0
Q8VBY2	72	0.997108	25.3754	114.98	K	SASRPTPVRPSLSARKFSLQERPAGSCLGAQ	K(0.997)FSLQER(0.003)PAGSCLGAQVGPYSTGPASHISPR	0	0	0	6.16439e+07	0	0	3.75029e+07	0	0	0	0	0	1.02894e+08	0	0	9.97007e+07	0	0	8.89385e+06	0	0	0	0	0	6.13126e+07	0	0	4.12203e+07	0	0	8.28559e+07	0	0	6.00695e+07	0	0
Q8VBY2	456	1	63.5835	180.61	K	IPSWTTVILVKSMLRKRSFGNPFEPQARREE	K(1)RSFGNPFEPQAR	7.27475e+07	0	0	7.84194e+07	0	0	1.12984e+08	0	0	7.91731e+07	0	0	5.87713e+07	0	0	4.78717e+07	0	0	6.84343e+07	0	0	8.27532e+07	0	0	8.19989e+07	0	0	9.06545e+07	0	0	0	0	0	5.35604e+07	0	0
Q8VCI5	33	0.991021	20.4861	139.74	K	LEELLESALDDFDKAKPSPEHAPTISAPDAS	AK(0.991)PSPEH(0.009)APTISAPDASGPQKR	0	0	0	9.92322e+06	0	0	8.52519e+06	0	0	0	0	0	0	0	0	4.84203e+06	0	0	0	0	0	0	0	0	0	0	0	0	0	0	4.38634e+06	0	0	5.13664e+06	0	0
Q8VD37	155	0.498052	0	102.72	K	KASIGNIALSPSPVRKSPRRSPGAIKRNLSS	ASIGNIALSPSPVR(0.498)K(0.498)SPR(0.004)	0	0	0	0	0	0	0	0	0	0	0	0	0	0	0	0	0	0	0	0	0	0	0	0	0	0	0	0	0	0	0	0	0	0	0	0
Q8VD37	284	1	90.5917	205.43	K	VATGNDQAATEAKIEKLPSISDLDSIFGPVL	IEK(1)LPSISDLDSIFGPVLSPK(1)	2.14561e+07	9.48354e+07	0	7.73729e+06	8.30021e+07	0	1.38778e+07	7.73818e+07	0	1.58616e+07	7.97432e+07	0	1.31486e+07	1.13796e+08	0	3.76288e+06	1.14341e+08	0	2.42606e+07	1.29811e+08	0	2.98111e+07	1.25576e+08	0	1.22862e+07	119621750	0	1.3938e+07	1.12741e+08	0	1.88278e+07	176987648	0	5.74081e+06	1.34013e+08	0
Q8VD37	473	0.835696	7.05321	75.512	K	PPPPRPPSRPKLPPGKPGVGDVSRPFSPPIH	LPPGK(0.836)PGVGDVSR(0.167)PFSPPIH(0.998)SSSPPPIAPLAR	1.22542e+07	9.92987e+07	0	0	0	0	0	0	0	0	3.68687e+08	0	1.63652e+07	0	0	0	0	0	0	0	0	0	6.50458e+07	0	0	3.75689e+08	0	0	0	0	1.73666e+07	0	0	0	0	0
Q8VD37	400	0.999676	35.4203	100.14	K	QTFIKDDYLETLSSPKECGLGQRATPPPPPP	VAEQTFIKDDYLETLSSPK(1)ECGLGQR	3.90877e+07	0	0	5.91604e+06	0	0	4.04535e+07	0	0	4.10517e+07	0	0	5.10498e+07	0	0	4.24875e+07	0	0	7.619e+07	0	0	0	0	0	0	0	0	2.175e+07	0	0	5.60054e+07	0	0	3.84356e+07	0	0
Q8VD46	200	1	64.6504	92.247	K	ALTWAARQGHKNVILKLLELGANKMLQTKDG	NVILK(1)LLELGANK(1)MLQTK(1)	0	0	0	0	0	8.06757e+06	0	0	4.00861e+06	0	0	0	0	0	0	0	0	0	0	0	3.82596e+06	0	0	0	0	0	0	0	0	0	0	0	1.32756e+07	0	0	0
Q8VD46	208	1	64.6504	92.247	K	GHKNVILKLLELGANKMLQTKDGRTPSEIAK	NVILK(1)LLELGANK(1)MLQTK(1)	0	0	0	0	0	8.06757e+06	0	0	4.00861e+06	0	0	0	0	0	0	0	0	0	0	0	3.82596e+06	0	0	0	0	0	0	0	0	0	0	0	1.32756e+07	0	0	0
Q8VEK3	246	0.98671	20.9139	108.69	K	RGYFEYIEENKYSRAKSPQPPVEEEDEHFDD	AK(0.987)SPQPPVEEEDEH(0.005)FDDTVVCLDTYNCDLHFK(0.008)	2.41881e+08	0	0	2.16546e+08	0	0	2.08647e+08	0	0	1.41126e+07	0	0	1.46027e+08	0	0	1.80574e+08	0	0	3.08964e+07	0	0	134013393	0	0	3.76122e+07	0	0	9.61371e+07	0	0	1.22411e+08	0	0	9.55822e+07	0	0
Q8VHF2	416	0.999601	34.925	61.16	K	AVTYRVTNSSEFMMNKDIMLTAVPMEEARTI	VTNSSEFMMNK(1)DIMLTAVPMEEARTIR	0	0	0	6.08604e+07	0	0	2.90284e+07	0	0	4.81832e+07	0	0	1.86776e+07	0	0	0	0	0	8.72421e+07	0	0	1.20454e+08	0	0	1.06246e+08	0	0	1.52341e+07	0	0	0	0	0	3.5248e+07	0	0
Q8VHK5	181	1	93.1581	120.82	K	VIISARSSEEPCKKKKGSISDGSNILDEVTF	K(1)GSISDGSNILDEVTFPAR	0	0	0	0	0	0	0	0	0	0	0	0	3.3379e+07	0	0	0	0	0	0	0	0	0	0	0	0	0	0	3.5112e+07	0	0	3.736e+07	0	0	5.08425e+07	0	0
Q8VHK5	180	0.808209	6.24697	94.542	K	TVIISARSSEEPCKKKKGSISDGSNILDEVT	K(0.808)K(0.192)GSISDGSNILDEVTFPAR	23159776	0	0	0	0	0	1.25936e+07	0	0	3.1275e+07	0	0	3.3379e+07	0	0	3.49427e+07	0	0	3.96178e+07	0	0	4.26431e+07	0	0	2.62744e+07	0	0	3.5112e+07	0	0	3.736e+07	0	0	5.08425e+07	0	0
Q91V14	1052	0.997196	25.5103	86.131	K	AEKNKGPSPVSSEGIKDFFSMKPEWENLNQS	GPSPVSSEGIK(0.997)DFFSMK(0.003)PEWENLNQSNVR	0	0	0	0	0	0	6.65075e+06	0	0	0	0	0	1.17459e+07	0	0	9.25347e+06	0	0	0	0	0	0	0	0	0	0	0	2.41618e+07	0	0	0	0	0	0	0	0
Q91W43	549	0.999999	60.8504	83.877	K	HSETNLVRYMKKLENKDISLVHSMIPLGSCT	LENK(1)DISLVH(0.984)SMIPLGSCTMK(0.016)	0	0	0	0	0	0	0	0	0	0	0	0	0	0	0	0	0	0	0	0	0	0	0	0	0	0	0	0	0	0	0	0	0	0	0	0
Q91XC8	42	0.960629	13.8739	184.91	K	VQKHPHTGDGKEERDKDDQEWESTSPPKPTV	DK(0.961)DDQEWESTSPPK(0.039)PTVFISGVIAR	6.73619e+07	0	0	0	0	0	1.08236e+08	0	0	9.68661e+07	0	0	8.65504e+07	0	0	0	0	0	2.60524e+08	0	0	1.29973e+08	0	0	164234804	0	0	1.84263e+08	0	0	1.56395e+08	0	0	1.46372e+08	0	0
Q91XC8	54	0.996177	26.4079	184.91	K	ERDKDDQEWESTSPPKPTVFISGVIARGDKD	DK(0.002)DDQEWESTSPPK(0.996)PTVFISGVIAR(0.002)	1.73825e+07	0	0	1.24192e+07	0	0	1.67009e+07	0	0	1.94934e+07	0	0	1.32139e+07	0	0	1.89948e+07	0	0	0	0	0	3.0686e+07	0	0	5.4961e+07	0	0	2.47178e+07	0	0	3.9957e+07	0	0	0	0	0
Q920N7	95	1	120.541	128.95	K	PWNDQRTTTRGPPSRKGSLSIEDTFESISEL	K(1)GSLSIEDTFESISELGPLELMGR	4.20971e+06	0	0	4.25008e+06	0	0	4.07307e+06	0	0	5.83824e+06	0	0	1.3045e+07	0	0	7.12675e+06	0	0	6.40203e+06	0	0	4.2883e+06	0	0	1.92397e+07	0	0	4.86573e+06	0	0	1.38803e+07	0	0	1.1883e+07	0	0
Q920Q2	796	0.999998	55.5399	112.85	K	TVTLDQATDSAKIIGKATLNMFHTMKLNISD	IIGK(1)ATLNMFH(0.715)TMK(0.285)	0	0	0	0	1.99149e+08	0	0	131071392	0	0	184210371	0	0	1.75328e+08	0	0	2.1517e+08	0	0	0	0	0	220399713	0	0	0	0	0	1.60707e+08	0	0	0	0	0	8.80987e+07	0
Q920Q2	912	0.962425	14.0846	107.65	K	AASVSPDTNSGECSRKWNGLHSPVSGQSRLN	K(0.962)WNGLH(0.038)SPVSGQSR	4.31468e+06	0	0	5.84423e+06	0	0	0	0	0	0	0	0	0	0	0	0	0	0	0	0	0	0	0	0	0	0	0	0	0	0	0	0	0	4.31014e+06	0	0
Q922J3	1053	1	68.2767	79.511	K	AQTAEDAMQIMEQMTKEKTETLASLEDTKQT	AKAAQTAEDAMQIMEQMTK(1)EK(1)	0	2.73545e+08	0	0	2.34939e+07	0	0	7.71806e+07	0	0	2.77934e+08	0	0	1.14179e+08	0	0	1.28471e+08	0	0	2.69561e+08	0	0	46361130	0	0	1.63678e+08	0	0	7.9874e+08	0	0	9.936e+07	0	0	2.63793e+08	0
Q922J3	328	1	174.478	226.23	K	SSLSSMSSVASSVSSKPSRTGLLTETSSRYA	SPSASSLSSMSSVASSVSSK(1)PSR	1.93124e+07	0	0	3.71891e+07	0	0	2.25028e+07	0	0	2.80372e+07	0	0	2.77072e+07	0	0	1.32918e+07	0	0	2.95512e+07	0	0	9.55314e+06	0	0	2.83679e+07	0	0	6.228e+06	0	0	3.73958e+07	0	0	1.63746e+07	0	0
Q922M7	181	0.527228	0.751839	90.972	K	HNNNDTQQNHDLMNRKSPSGPVKSPPLSPVG	K(0.527)SPSGPVK(0.443)SPPLSPVGTTPVK(0.029)	0	0	0	1.7005e+07	0	0	0	0	0	0	0	0	0	0	0	0	0	0	0	0	0	0	0	0	1.97231e+07	0	0	0	0	0	3.02787e+07	0	0	0	0	0
Q922M7	188	0.990549	22.2166	106.42	K	QNHDLMNRKSPSGPVKSPPLSPVGTTPVKLK	K(0.004)SPSGPVK(0.991)SPPLSPVGTTPVK(0.006)	2.55077e+07	0	0	2.23735e+07	0	0	2.23538e+07	0	0	3.27646e+07	0	0	2.84342e+07	0	0	4.84933e+07	0	0	0	0	0	5.1576e+07	0	0	0	0	0	3.01649e+07	0	0	3.57424e+07	0	0	7.51788e+06	0	0
Q925J9	1190	0.980345	18.0515	65.854	K	KPQGKPSSLMNPSISKPNISPSHSRPPGGSD	PSSLMNPSISK(0.98)PNISPSH(0.003)SR(0.001)PPGGSDK(0.015)	0	0	0	4.43954e+06	0	0	0	0	0	0	0	0	0	0	0	0	0	0	0	0	0	0	0	0	0	0	0	0	0	0	0	0	0	0	0	0
Q99104	1437	0.999725	35.751	68.353	K	KTVRKLKKQLKVFAKKIGELEVGQMENISPG	K(1)IGELEVGQMENISPGQIIDEPIRPVNIPR	4.33157e+07	0	0	8.30877e+07	0	0	6.34869e+07	0	0	1.16751e+08	0	0	8.37679e+07	0	0	1.76387e+07	0	0	9.6524e+07	0	0	5.5461e+07	0	0	4.77202e+07	0	0	1.38762e+08	0	0	9.74311e+07	0	0	5.17572e+07	0	0
Q99104	597	1	93.4452	149.3	K	SSKFKMLPELFQDDEKAISPTSATSSGRTPL	MLPELFQDDEK(1)AISPTSATSSGR	1.18432e+07	0	0	1.89999e+07	0	0	1.51857e+07	0	0	2.00403e+07	0	0	2.04385e+07	0	0	1.93575e+07	0	0	0	0	0	6.22163e+07	0	0	0	0	0	0	0	0	0	0	0	3.04143e+07	0	0
Q99JF8	174	0.815519	6.45483	76.807	K	TEEAGMVTAATASNVKASPKRGRPAATEVKI	QVDTEEAGMVTAATASNVK(0.816)ASPK(0.184)	0	0	0	3.76832e+07	0	0	1.32763e+07	0	0	6.77084e+06	0	0	5.36209e+06	0	0	9.25966e+06	0	0	2.57233e+07	0	0	0	0	0	0	0	0	1.18543e+07	0	0	0	0	0	1.82435e+07	0	0
Q99JG2	467	0.999975	46.1527	229.96	K	DSKLKAEVSSSIYFHKPRESPPLLPLGTPC_	AEVSSSIYFHK(1)PRESPPLLPLGTPC	4.22341e+06	0	0	0	0	0	0	0	0	0	0	0	4.30328e+06	0	0	0	0	0	4.23269e+06	0	0	0	0	0	0	0	0	0	0	0	0	0	0	0	0	0
Q99K28	148	0.615017	2.03445	263.22	K	LWIDSMNSAPSHSPEKKDSDFFTEHTQAPAW	HGTDLWIDSMNSAPSHSPEK(0.615)K(0.385)	4.69236e+07	0	0	0	0	0	0	0	0	0	0	0	0	0	0	0	0	0	0	0	0	0	0	0	0	0	0	0	0	0	0	0	0	7.07297e+07	0	0
Q99KN9	305	0.994059	23.254	187.09	K	SKTIDLGAAAHYTGDKASPDQNASTHTPQSS	TIDLGAAAH(0.005)YTGDK(0.994)ASPDQNASTH(0.001)TPQSSAK(0.001)	2.07648e+07	0	0	2.95744e+07	0	0	2.33226e+07	0	0	1.78973e+07	0	0	2.41292e+07	0	0	2.45299e+07	0	0	5.20928e+06	0	0	2.45385e+07	0	0	3.4117e+07	0	0	1.51105e+07	0	0	0	0	0	2.58995e+07	0	0
Q99LD4	447	0.793459	8.72956	75.184	K	AMILRAAVLRNQIHVKSPPREGSQGELTPAN	NQIH(0.1)VK(0.793)SPPR(0.106)EGSQGELTPANSQSR	0	0	0	1.23663e+07	0	0	0	0	0	0	0	0	1.00887e+07	0	0	8.9241e+06	0	0	0	0	0	0	0	0	1.35682e+07	0	0	1.7055e+07	0	0	0	0	0	0	0	0
Q99LI7	697	0.999998	58.3203	113.91	K	KAVKRPNEDSDEDEEKGAVVPPVHDIYRARQ	RPNEDSDEDEEK(1)GAVVPPVHDIYR	3.96648e+07	0	0	0	0	0	0	0	0	0	0	0	3.02294e+07	0	0	3.19648e+07	0	0	1.45935e+07	0	0	2.5359e+07	0	0	3.50992e+07	0	0	6.57556e+06	0	0	2.55181e+07	0	0	0	0	0
Q99P72	487	0.999538	33.3488	145.23	K	DEKKIEERKAQIITEKTSPKTSNPFLVAIHD	KAQIITEK(1)TSPK	1.16757e+08	0	0	1.7594e+08	0	0	9.82197e+07	0	0	6.47703e+06	0	0	1.56088e+08	0	0	207006080	0	0	131875884	0	0	7.13727e+07	0	0	7.22481e+07	0	0	106342395	0	0	1.43093e+08	0	0	1.77707e+08	0	0
Q99P72	774	0.999539	33.3675	82.216	K	HKHKERLSASPQEVGKPYLESFQPNLHITKD	LSASPQEVGK(1)PYLESFQPNLHITK	2.26747e+08	0	0	332490834	0	0	2.19714e+08	0	0	3.64583e+08	0	0	3.97893e+08	0	0	4.19878e+08	0	0	241460409	0	0	2.00134e+08	0	0	2.08427e+08	0	0	2.16598e+08	0	0	4.42521e+08	0	0	3.41359e+08	0	0
Q99P72	830	1	61.2031	107.91	K	IYSNDDLLSSKEDKMKESETFSDSSPIEIID	MK(1)ESETFSDSSPIEIIDEFPTFVSAK(1)	6.98205e+07	2.06936e+07	0	7.31528e+07	1.54909e+07	0	6.59217e+07	1.23894e+07	0	8.05331e+07	1.97767e+07	0	9.6187e+07	1.7683e+07	0	1.08784e+08	2.23565e+07	0	1.28466e+08	1.14106e+07	0	9.52938e+07	0	0	1.10647e+08	1.80662e+07	0	0	2.02323e+07	0	0	1.12438e+07	0	1.1948e+08	3.29914e+07	0
Q99P72	652	0.961228	14.0375	91.213	K	PYEEAMSVALKTSDSKEEIKEPESFNAAAQE	TSDSK(0.961)EEIK(0.038)EPESFNAAAQEAEAPYISIACDLIK(0.001)	6.49088e+07	0	0	5.93915e+07	0	0	5.63398e+07	0	0	6.40825e+07	0	0	8.89167e+07	0	0	8.7779e+07	0	0	1.16438e+07	0	0	1.08649e+08	0	0	9.17912e+07	0	0	1.31028e+08	0	0	8.49413e+07	0	0	1.16554e+08	0	0
Q99P72	656	0.7922	5.81516	62.495	K	AMSVALKTSDSKEEIKEPESFNAAAQEAEAP	TSDSK(0.208)EEIK(0.792)EPESFNAAAQEAEAPYISIACDLIK	5.95142e+07	0	0	0	0	0	0	0	0	0	0	0	0	0	0	1.09714e+08	0	0	0	0	0	0	0	0	1.37696e+07	0	0	0	0	0	0	0	0	2.25927e+06	0	0
Q99PD7	305	1	119.408	190.63	K	CDATVVLLKKANFHRKASVIMVDELLSAYPH	K(1)ASVIMVDELLSAYPHQLSFSEAGLR	1.83651e+08	0	0	187571700	0	0	1.86535e+08	0	0	3.19455e+08	0	0	2.09787e+08	0	0	257760793	0	0	2.5203e+08	0	0	2.6994e+08	0	0	2.89117e+08	0	0	2.86984e+08	0	0	3.37508e+08	0	0	3.5409e+08	0	0
Q99PU5	51	0.669917	3.36717	66.206	K	DNSQTSSLIDGQTLSKESPSHGLELSAPEKA	DDQQQGASLGTSQDNSQTSSLIDGQTLSK(0.67)ESPSH(0.309)GLELSAPEK(0.022)	1.63348e+07	0	0	0	0	0	0	0	0	0	0	0	0	0	0	0	0	0	0	0	0	0	0	0	0	0	0	0	0	0	1.3887e+07	0	0	0	0	0
Q9CX80	116	0.969618	14.8219	82.029	K	KVSSVLALVGKAHALKHKVEPMYFKILSGVI	AH(0.999)ALK(0.97)H(0.97)K(0.078)VEPMYFK(0.984)	0	0	0	0	0	0	0	0	0	0	0	0	0	0	4.6003e+06	0	0	0	0	0	7.93956e+06	0	0	0	0	0	7.76982e+06	0	0	0	0	0	0	0	0	0
Q9CXM0	251	0.999979	46.8014	114.31	K	GTCCFQMLHKSKGRSKTSPNQSTLWISKSTR	SK(1)TSPNQSTLWISK	9.86621e+06	0	0	0	0	0	0	0	0	0	0	0	0	0	0	1.45239e+07	0	0	0	0	0	1.1162e+07	0	0	0	0	0	0	0	0	0	0	0	0	0	0
Q9CY58	228	0.846935	10.1405	78.975	K	EDKRGGSGSHNWGTVKDELTESPKYIQKQIS	GGSGSHNWGTVK(0.847)DELTESPK(0.082)YIQK(0.071)	0	0	0	0	0	0	3.01247e+07	0	0	0	0	0	0	0	0	0	0	0	0	0	0	0	0	0	0	0	0	0	0	0	0	0	0	0	0	0
Q9CY58	236	0.974307	15.8016	105.57	K	SHNWGTVKDELTESPKYIQKQISYNCSDLDQ	GGSGSHNWGTVKDELTESPK(0.974)YIQK(0.026)	5.21322e+07	0	0	5.6596e+07	0	0	6.13838e+07	0	0	4.02464e+07	0	0	3.07255e+07	0	0	3.36716e+07	0	0	0	0	0	0	0	0	0	0	0	4.82028e+07	0	0	5.69587e+07	0	0	4.40053e+07	0	0
Q9CYT6	303	0.697789	4.81308	112.41	K	KNPSLRAQGQIRSPTKTHTPSPTSPKSNSPQ	AQGQIR(0.23)SPTK(0.698)TH(0.037)TPSPTSPK(0.035)	0	0	0	0	0	0	0	0	0	6.36816e+06	0	0	4.77092e+06	0	0	0	0	0	0	0	0	5.58022e+06	0	0	3.51247e+06	0	0	0	0	0	0	0	0	0	0	0
Q9CZ44	112	0.887913	8.98834	218.45	K	GGSERSGQQIVGPPRKKSPNELVDDLFKGAK	K(0.888)K(0.112)SPNELVDDLFK	6.96544e+07	0	0	6.44309e+07	0	0	6.53568e+07	0	0	8.35777e+07	0	0	1.16839e+08	0	0	7.4757e+07	0	0	1.31802e+07	0	0	1.10177e+08	0	0	9.57187e+07	0	0	1.84469e+08	0	0	1.95488e+08	0	0	2.45235e+08	0	0
Q9CZ44	113	0.795496	5.89935	194.86	K	GSERSGQQIVGPPRKKSPNELVDDLFKGAKE	K(0.205)K(0.795)SPNELVDDLFK	6.96544e+07	0	0	6.20921e+07	0	0	0	0	0	3.27964e+06	0	0	5.03236e+06	0	0	0	0	0	8.91484e+07	0	0	1.05259e+08	0	0	9.21999e+07	0	0	0	0	0	0	0	0	0	0	0
Q9CZ44	139	0.999307	31.5927	115.29	K	KGAKEHGAVAVERVTKSPGETSKPRPFAGGG	VTK(0.999)SPGETSK(0.001)PR	4.18141e+06	0	0	2.50671e+06	0	0	575598	0	0	3.6958e+06	0	0	5.43349e+06	0	0	1.07625e+07	0	0	2.42368e+06	0	0	2.51151e+06	0	0	1.60147e+06	0	0	6.80218e+06	0	0	1.31162e+07	0	0	1.7061e+07	0	0
Q9CZT4	24	0.997252	25.4975	47.38	K	VIQEIDVYLAKSLAEKLYLFQYPVRPASMTY	SLAEK(0.997)LYLFQYPVR(0.025)PASMTYDDIPH(0.981)LSAK(0.997)	0	0	0	0	0	0	0	0	0	0	0	3.03924e+06	0	0	0	0	0	0	0	0	0	0	0	0	0	0	0	0	0	0	0	0	0	0	0	0
Q9D0L7	62	0.61185	1.97646	205.15	K	LTDGSYDDILNAEQLKKLLYLLESTDDPVIT	SAEDLTDGSYDDILNAEQLK(0.612)K(0.388)	3.86628e+07	0	0	4.31902e+07	0	0	3.16645e+07	0	0	3.0765e+07	0	0	4.09717e+07	0	0	3.28731e+07	0	0	3.56628e+07	0	0	4.75999e+07	0	0	2.91777e+07	0	0	2.20639e+07	0	0	5.71911e+07	0	0	1.54126e+07	0	0
Q9D0M1	317	1	59.7887	59.789	K	IDEVVVTNTVPHELQKLQCPKIKTVDISLIL	LIEESPIDEVVVTNTVPH(1)ELQK(1)LQCPK(1)IK(1)	0	0	0	0	0	0	0	0	0	0	0	0	0	0	0	0	0	0	0	0	2.13166e+07	0	0	0	0	0	0	0	0	0	0	0	0	0	0	8.80059e+06
Q9D0M1	322	1	59.7887	59.789	K	VTNTVPHELQKLQCPKIKTVDISLILSEAIR	LIEESPIDEVVVTNTVPH(1)ELQK(1)LQCPK(1)IK(1)	0	0	0	0	0	0	0	0	0	0	0	0	0	0	0	0	0	0	0	0	2.13166e+07	0	0	0	0	0	0	0	0	0	0	0	0	0	0	8.80059e+06
Q9D0V7	34	1	74.9739	128.74	K	FSFLKRLICRSGRGRKLSGDQITLPTTVDYS	K(1)LSGDQITLPTTVDYSSVPK	1.72323e+07	0	0	9.07437e+06	0	0	9.64459e+06	0	0	1.2149e+07	0	0	9.86839e+06	0	0	1.25523e+07	0	0	2.63593e+07	0	0	0	0	0	1.65609e+07	0	0	1.26632e+07	0	0	1.51658e+07	0	0	1.64759e+07	0	0
Q9D1J3	10	0.488768	0	88.338	K	______MAAETVELHKLKLAELKQECLARGL	AAETVELH(0.489)K(0.489)LK(0.022)LAELK(1)	0	0	0	0	0	0	0	0	0	0	0	0	0	0	0	0	0	0	0	0	0	0	0	0	0	0	0	0	0	0	0	0	0	0	0	0
Q9D1T0	595	0.948809	12.6798	202.86	K	KGNTKHNIEIEYVPRKSDAGISSADAPRKFN	HNIEIEYVPR(0.051)K(0.949)SDAGISSADAPR	7.76675e+07	0	0	7.18301e+07	0	0	0	0	0	0	0	0	4.43825e+07	0	0	4.53705e+07	0	0	9.65808e+07	0	0	9.90967e+07	0	0	8.13354e+07	0	0	1.49067e+07	0	0	0	0	0	5.68238e+07	0	0
Q9D1T5	12	0.874177	8.41841	101.97	K	____MADSGGSSPWWKSLTRKKSKEVTVGVQ	MADSGGSSPWWK(0.874)SLTR(0.126)	0	0	0	0	0	0	0	0	0	0	0	0	0	0	0	0	0	0	0	0	0	0	0	0	0	0	0	0	0	0	0	0	0	0	0	0
Q9D2P8	97	0.997726	26.593	170.18	K	PAASPVVVRAPPAKPKSPLMPAKPRSPPRPA	APPAKPK(0.998)SPLMPAK(0.002)	0	0	0	2.52616e+07	0	0	0	0	0	6.32282e+07	0	0	4.59679e+07	0	0	4.96755e+07	0	0	3.94669e+06	0	0	0	0	0	0	0	0	4.86914e+07	0	0	3.51458e+07	0	0	3.96924e+07	0	0
Q9D5V5	18	0.954113	13.1949	94.845	K	TSNLLKNKGSLQFEDKWDFMHPIVLKLLRQE	NK(0.046)GSLQFEDK(0.954)WDFMHPIVLK	0	0	0	6.23613e+06	0	0	0	0	0	6.73392e+06	0	0	0	0	0	0	0	0	2.8526e+07	0	0	1.21224e+07	0	0	1.66119e+07	0	0	0	0	0	0	0	0	6.33059e+06	0	0
Q9D8N0	296	0.999961	45.1094	66.413	K	AHLPKSTFVLDEFKRKYSNEDTLSVALPYFW	K(1)YSNEDTLSVALPYFWEHFDKDGWSLWYAEYR	1.01776e+07	0	0	0	0	0	4.4235e+06	0	0	0	0	0	0	0	0	0	0	0	1.80124e+07	0	0	4.28004e+06	0	0	6.10164e+06	0	0	0	0	0	0	0	0	6.76953e+06	0	0
Q9DB25	301	1	50.9665	62.813	K	EGSKLVPFWSWLQMGKDLLFIRLRYLTGAWR	LVPFWSWLQMGK(1)DLLFIR(1)LR(1)	0	0	0	0	0	0	0	0	0	0	0	0	0	0	2.82498e+07	0	0	3.8849e+07	0	0	0	0	0	0	0	0	0	0	0	1.81607e+08	0	0	0	0	0	2.39694e+07
Q9DCP2	50	0.954341	13.2118	185.63	K	TEDTQHCGEGKGFLQKSPSKEPHFTDFEGKT	GFLQK(0.954)SPSK(0.046)EPHFTDFEGK	2.78901e+07	0	0	2.41296e+07	0	0	2.47543e+07	0	0	0	0	0	5.92593e+06	0	0	0	0	0	2.76165e+07	0	0	0	0	0	4.54347e+07	0	0	0	0	0	0	0	0	0	0	0
Q9DCP2	54	0.492515	0	185.63	K	QHCGEGKGFLQKSPSKEPHFTDFEGKTSFGM	GFLQK(0.493)SPSK(0.493)EPHFTDFEGK(0.015)	0	0	0	0	0	0	0	0	0	0	0	0	0	0	0	0	0	0	0	0	0	0	0	0	0	0	0	0	0	0	0	0	0	0	0	0
Q9EPN1	1522	1	80.317	217.32	K	SKTPLENVPGNLSPIKDPDRLLQDVDINRLR	TPLENVPGNLSPIK(1)DPDR	1.64511e+07	0	0	2.77662e+07	0	0	1.54011e+07	0	0	1.04508e+07	0	0	1.00642e+07	0	0	1.19267e+07	0	0	0	0	0	2.72288e+07	0	0	1.61865e+07	0	0	0	0	0	2.02347e+07	0	0	1.47239e+07	0	0
Q9EQG9	152	0.855641	7.72849	124.85	K	VSGASGYSATSTSSFKKGHSLREKLAEMETF	HGSMVSLVSGASGYSATSTSSFK(0.856)K(0.144)	0	0	0	1.2371e+07	0	0	0	0	0	0	0	0	0	0	0	0	0	0	1.64442e+07	0	0	4.33075e+06	0	0	1.44277e+07	0	0	5.27195e+06	0	0	0	0	0	0	0	0
Q9EQH3	14	0.999517	33.1541	131.31	K	__MPTTQQSPQDEQEKLLDEAIQAVKVQSFQ	PTTQQSPQDEQEK(1)LLDEAIQAVK	8.37915e+07	0	0	5.76751e+07	0	0	4.0139e+07	0	0	0	0	0	4.91053e+07	0	0	4.0273e+07	0	0	0	0	0	0	0	0	0	0	0	6.71078e+07	0	0	8.19547e+07	0	0	9.10704e+07	0	0
Q9ER64	811	0.333334	0	74.505	K	GESPCPRCRREVHRLKMLQEAVLSIQEAQQE	EVH(0.333)R(0.333)LK(0.333)MLQEAVLSIQEAQQELH(0.955)R(0.045)	0	0	0	0	0	0	0	0	0	0	0	0	0	0	0	0	0	0	0	0	0	0	0	0	0	0	0	0	0	0	0	0	0	0	0	0
Q9ERD7	58	1	69.0536	149.3	K	QLERISVYYNEASSHKYVPRAILVDLEPGTM	ISVYYNEASSHK(1)YVPR	2.08929e+07	0	0	1.09145e+07	0	0	2.06858e+07	0	0	2.9648e+07	0	0	1.51543e+07	0	0	2.65595e+07	0	0	2.05484e+07	0	0	1.92274e+07	0	0	1.743e+07	0	0	0	0	0	0	0	0	3.02263e+07	0	0
Q9ERG2	330	0.997745	26.4591	57.845	K	GAGEARSSGDGTEWDKDDLSPTAEVWDVDQG	SSGDGTEWDK(0.998)DDLSPTAEVWDVDQGLISK(0.002)	2.30338e+07	0	0	2.30878e+07	0	0	1.69818e+07	0	0	1.94101e+07	0	0	2.3243e+07	0	0	2.66455e+07	0	0	2.86015e+07	0	0	0	0	0	0	0	0	2.14567e+07	0	0	0	0	0	3.33117e+07	0	0
Q9ERL9	270	0.982057	17.4169	84.948	K	YSVHVKSTKPSLSPGKPQSSLVIPASLFCKT	STK(0.018)PSLSPGK(0.982)PQSSLVIPASLFCK	8.39299e+06	0	0	1.20986e+07	0	0	8.54382e+06	0	0	2.66094e+07	0	0	1.23253e+07	0	0	1.98612e+07	0	0	1.04575e+07	0	0	1.34811e+07	0	0	1.34953e+07	0	0	6.95998e+06	0	0	0	0	0	0	0	0
Q9ERV1	143	0.99952	33.4683	82.211	K	NNPGGCSDPQTSPEMKPHSYLDAIRTGLDDL	VNNPGGCSDPQTSPEMK(1)PHSYLDAIR	2.07711e+07	0	0	1.45627e+07	0	0	1.38517e+07	0	0	1.80965e+07	0	0	2.60239e+07	0	0	1.90687e+07	0	0	2.56705e+07	0	0	2.80375e+07	0	0	0	0	0	2.3627e+07	0	0	2.00351e+07	0	0	2.49848e+07	0	0
Q9ES28	131	1	119.328	153.41	K	LGSDSVCARPSSHRIKSFDSLGSQSSHSRTS	IK(1)SFDSLGSQSSHSR	1.06059e+07	0	0	7.92753e+06	0	0	0	0	0	7.66471e+06	0	0	1.29569e+07	0	0	1.1568e+07	0	0	5.89822e+06	0	0	0	0	0	0	0	0	0	0	0	0	0	0	9.41892e+06	0	0
Q9ES28	235	0.999633	34.3561	187.75	K	IKPSEKPVSPKSGTLKSPPKGFDTTAINKSY	SGTLK(1)SPPKGFDTTAINK	1.8992e+08	0	0	2.37227e+08	0	0	2.30059e+08	0	0	1.97836e+08	0	0	1.88115e+08	0	0	2.1561e+08	0	0	281141184	0	0	2.33682e+08	0	0	3.37948e+08	0	0	1.44614e+08	0	0	2.39362e+08	0	0	2.04715e+08	0	0
Q9ES28	239	0.824231	6.82564	216.72	K	EKPVSPKSGTLKSPPKGFDTTAINKSYYNVV	SGTLK(0.171)SPPK(0.824)GFDTTAINK(0.005)	0	0	0	0	0	0	0	0	0	0	0	0	2.77162e+07	0	0	0	0	0	1.57129e+07	0	0	0	0	0	2.17586e+07	0	0	0	0	0	0	0	0	3.8722e+07	0	0
Q9ES97	228	1	93.6376	148.89	K	TYSLSPSELPVASVEKDSPESPFEVIIDKAT	AEHICTYSLSPSELPVASVEK(1)DSPESPFEVIIDK(1)	206278324	3.10919e+07	0	1.48623e+08	2.54297e+07	0	1.36259e+08	2.28851e+07	0	1.16485e+08	33351908	0	1.35803e+08	3.65361e+07	0	1.46658e+08	3.49767e+07	0	2.45971e+08	2.88148e+07	0	2.92468e+08	0	0	2.47596e+08	6.90611e+07	0	3.7075e+08	5.75509e+07	0	1.90364e+08	4.61498e+07	0	1.99793e+08	5.70521e+07	0
Q9ESC8	178	1	129.014	145.99	K	QHGSEHSKSRSSSPGKPQAVSSLSSSHSRSH	SSSPGK(1)PQAVSSLSSSHSR	3.00913e+07	0	0	5.89612e+07	0	0	4.93834e+07	0	0	7.1876e+07	0	0	4.15323e+07	0	0	3.10934e+07	0	0	2.89294e+07	0	0	3.24227e+07	0	0	4.61308e+07	0	0	2.51255e+07	0	0	7.95863e+07	0	0	3.47783e+07	0	0
Q9ESN9	1190	0.99701	26.5959	109.92	K	TVVLHRGQLLGLRANKTSPTSGEGTRPGGII	ANK(0.997)TSPTSGEGTR(0.002)PGGIIH(0.001)VYGDDSSDK	1.89041e+07	0	0	2.43311e+07	0	0	0	0	0	0	0	0	2.25951e+07	0	0	0	0	0	0	0	0	2.96226e+07	0	0	0	0	0	0	0	0	0	0	0	0	0	0
Q9ESN9	591	1	84.4372	132.14	K	FFSRLFSSSSSPPPAKRSYPSVNIHYKSPTA	LFSSSSSPPPAK(1)R	6.81819e+06	0	0	0	0	0	1.48869e+07	0	0	2.19438e+07	0	0	1.68866e+07	0	0	1.33657e+07	0	0	8.32649e+06	0	0	0	0	0	0	0	0	8.19477e+06	0	0	0	0	0	1.21871e+07	0	0
Q9ESN9	602	1	72.5711	219.96	K	PPPAKRSYPSVNIHYKSPTAAGFSQRRSHAL	SYPSVNIHYK(1)SPTAAGFSQR	3.75923e+07	0	0	3.57521e+07	0	0	2.71772e+07	0	0	3.00644e+07	0	0	2.59643e+07	0	0	0	0	0	32165597	0	0	2.12811e+07	0	0	3.12759e+07	0	0	2.15866e+07	0	0	6.70943e+07	0	0	2.50366e+07	0	0
Q9ESU6	76	0.503101	0	72.421	K	NQLQYLLRVVLKTLWKHQFAWPFQQPVDAVK	VVLKTLWK(0.503)H(0.503)QFAWPFQQPVDAVK(0.993)	0	0	0	0	0	0	0	0	0	0	0	0	0	0	0	0	2.42052e+07	0	0	1.63358e+08	0	0	5.05415e+07	0	0	0	0	0	1.49727e+08	0	0	0	0	0	0	0
Q9JHG6	156	0.980818	19.625	53.076	K	TLHIGSSHLAPPNPDKQFLISPPASPPVGWK	LYFAQTLH(0.012)IGSSH(0.01)LAPPNPDK(0.981)QFLISPPASPPVGWK(0.997)	0	0	0	0	3.109e+07	0	0	1.87332e+07	0	0	0	0	0	0	0	0	0	0	0	3.70102e+07	0	0	0	0	0	1.17975e+07	0	0	0	0	0	0	0	0	2.04367e+07	0
Q9JHU4	3252	1	75.6337	93.649	K	KLKKMVKDQQEAEKKKVMSQEIQEQLHKQQE	K(1)VMSQEIQEQLH(1)K(1)QQEVIADK(0.001)	0	0	0	0	0	0	0	0	0	0	0	0	0	0	0	0	0	0	0	0	0	0	0	0	0	0	0	0	0	0	0	0	0	0	0	0
Q9JHU4	3264	0.999639	34.4238	93.649	K	EKKKVMSQEIQEQLHKQQEVIADKQMSVKED	K(1)VMSQEIQEQLH(1)K(1)QQEVIADK(0.001)	0	0	0	0	0	0	0	0	0	0	0	0	0	0	0	0	0	0	0	0	0	0	0	0	0	0	0	0	0	0	0	0	0	0	0	0
Q9JI11	135	0.993757	23.1362	58.457	K	TLTEDEIATILQSTLKGLEYLHFMRKIHRDI	NKTLTEDEIATILQSTLK(0.994)GLEYLH(0.005)FMR(0.001)	0	0	0	1.15929e+07	0	0	0	0	0	8.00343e+06	0	0	5.01204e+06	0	0	1.33297e+07	0	0	0	0	0	1.858e+07	0	0	0	0	0	0	0	0	0	0	0	0	0	0
Q9JI38	382	0.995866	26.7643	42.301	K	LQGLDSVMVTCAAGTKMDEATEWRNIQPPVI	TH(0.998)MLYSMLQGLDSVMVTCAAGTK(0.996)MDEATEWR(0.002)NIQPPVIK(0.004)	0	9.20191e+06	0	0	0	0	0	0	0	0	0	0	0	0	0	0	2.98113e+06	0	0	0	0	0	0	0	0	0	0	0	7.97746e+06	0	0	1.29099e+07	0	0	0	0
Q9JI76	170	0.777501	6.29303	65.213	K	HSSTFEHLVYTLNNNKTQFPPMLCSLTEKRL	H(1)SSTFEH(1)LVYTLNNNK(0.778)TQFPPMLCSLTEK(0.183)R(0.04)	0	0	0	0	0	0	0	0	0	0	0	0	0	0	0	0	0	0	0	0	0	0	0	0	0	0	0	0	0	0	0	0	0	0	0	0
Q9JIA7	363	1	130.649	159.1	K	TEPALPIPGHSLPRAKSELVLAPAPAPAATH	AK(1)SELVLAPAPAPAATHSPLHR	1.85692e+07	0	0	0	0	0	1.74968e+07	0	0	4.57568e+07	0	0	7.52165e+07	0	0	5.25545e+07	0	0	4.32795e+07	0	0	2.18645e+07	0	0	3.03755e+07	0	0	2.62099e+07	0	0	1.99554e+07	0	0	3.05954e+07	0	0
Q9JIQ8	328	0.500555	0	70.26	K	LRQSLMFYGSRHQVEKVISHPNYDSKTKNND	H(0.499)QVEK(0.501)VISH(0.002)PNYDSK(0.998)	0	0	0	0	3.21979e+06	0	0	0	0	0	0	0	0	5.42998e+06	0	0	8.45972e+06	0	0	0	0	0	0	0	0	1.29532e+07	0	0	0	0	0	0	0	0	0	0
Q9JLM8	306	1	196.614	244.05	K	SRRGTTKSPGPSRRSKSPASTSSVNGTPGSQ	SK(1)SPASTSSVNGTPGSQLSTPR	7.48927e+06	0	0	3.33144e+07	0	0	0	0	0	0	0	0	9.05078e+06	0	0	1.30859e+07	0	0	0	0	0	1.03635e+07	0	0	1.73559e+07	0	0	9.51215e+06	0	0	0	0	0	5.49789e+06	0	0
Q9JM52	543	0.987698	20.1966	52.379	K	RARMNKQQNSPLAKAKPSSAGPEPPISQASP	AK(0.988)PSSAGPEPPISQASPSPPGPLSQTPPMQR(0.009)PVEPQEGPHK(0.003)	1.41302e+07	0	0	0	0	0	1.03929e+07	0	0	0	0	0	0	0	0	13029941	0	0	0	0	0	1.15701e+07	0	0	1.42796e+07	0	0	0	0	0	0	0	0	0	0	0
Q9JME5	278	1	135.658	189.15	K	ENPEKAFYGSEEDEAKGPGSEEAATAALPAR	AFYGSEEDEAK(1)GPGSEEAATAALPAR	4.1902e+08	0	0	5.03078e+08	0	0	3.74195e+08	0	0	3.46741e+08	0	0	3.2506e+08	0	0	268063630	0	0	2.6016e+08	0	0	3.32897e+08	0	0	3.18974e+08	0	0	1.76032e+08	0	0	4.94238e+08	0	0	2.34215e+08	0	0
Q9JMH9	2009	0.990015	19.9766	75.654	K	SDDGSLKSSSPTSHWKPLAPDPSDDEHDPVD	SSSPTSH(0.017)WK(0.99)PLAPDPSDDEH(0.993)DPVDSISRPR	0	5.69331e+07	0	7.29023e+07	7.25e+07	0	4.65424e+07	5.66565e+07	0	0	7.14716e+07	0	0	5.37025e+07	0	0	7.68776e+07	0	6.62954e+07	8.93243e+07	0	0	4.51778e+07	0	0	0	0	4.99569e+07	9.58743e+07	0	0	7.46411e+07	0	4.71039e+07	103212640	0
Q9QWI6	292	0.999982	47.3984	157.7	K	LIAHMFPQKLTMGMLKSPNTAILIKDEARNV	LTMGMLK(1)SPNTAILIKDEAR	6.7685e+07	0	0	9.8423e+07	0	0	7.16775e+07	0	0	3.94882e+07	0	0	6.11883e+07	0	0	5.61779e+07	0	0	4.34429e+07	0	0	0	0	0	0	0	0	3.08403e+07	0	0	5.23106e+07	0	0	0	0	0
Q9QWI6	913	0.90028	9.55594	92.671	K	EGMWPPPNNLLNQSPKKVAAETDFSKGLDFE	RQVDEGMWPPPNNLLNQSPK(0.9)K(0.1)	0	0	0	0	0	0	0	0	0	0	0	0	6.142e+06	0	0	0	0	0	0	0	0	0	0	0	0	0	0	0	0	0	0	0	0	0	0	0
Q9QX47	2143	0.499519	0	51.398	K	KQIAQSKEDDDVIVNKPHVSDEEEEEPPFYH	EDDDVIVNK(0.5)PH(0.5)VSDEEEEEPPFYHHPFK(0.001)	0	0	0	0	0	0	0	0	0	0	0	0	0	0	0	0	0	0	0	0	0	0	0	0	0	0	0	0	0	0	0	0	0	0	0	0
Q9QXL2	690	0.997574	26.0817	74.786	K	TLKKQYEEKLMMLQHKIRDTQLERDQVLQNL	LMMLQH(0.016)K(0.998)IR(0.986)DTQLER	0	3.05203e+07	0	0	6.64476e+07	0	0	8.1369e+07	0	0	1.74629e+08	0	0	109536353	0	0	9.24747e+07	0	0	2.5384e+08	0	0	1.46356e+08	0	0	1.32435e+08	0	0	2.12841e+08	0	0	142333401	0	0	7.93384e+07	0
Q9QXL2	532	0.625232	2.22278	55.871	K	FSASSAFSPTILSSDKETIEIIDLAKKDLEK	SPYFSASSAFSPTILSSDK(0.625)ETIEIIDLAK(0.375)	0	0	0	0	0	0	0	0	0	5.91594e+06	0	0	0	0	0	0	0	0	0	0	0	0	0	0	0	0	0	0	0	0	0	0	0	0	0	0
Q9QXS1	2190	1	89.2136	140.24	K	QESARQLQLAQEAAQKRLQAEEKAHAFVVQQ	QLQLAQEAAQK(1)R(1)LQAEEK	0	0	0	0	0	0	0	0	0	0	0	0	0	0	0	0	0	0	0	1.27121e+07	0	0	0	0	0	0	0	0	0	0	0	0	0	0	0	0
Q9QXY6	445	1	57.3247	57.325	K	AGEGIDDAEWVVARDKPMYDEIFYTLSPVDG	DK(1)PMYDEIFYTLSPVDGK(1)ITGANAK(1)	0	0	3.31312e+06	0	0	3.37144e+07	0	0	2.87363e+07	0	0	2.25457e+07	0	0	1.97229e+07	0	0	7.14563e+07	0	0	5.43548e+07	0	0	2.99101e+07	0	0	1.52239e+07	0	0	3.34957e+07	0	0	1.46281e+07	0	0	0
Q9QXY6	461	1	57.3247	101.23	K	PMYDEIFYTLSPVDGKITGANAKKEMVRSKL	DK(1)PMYDEIFYTLSPVDGK(1)ITGANAK(1)	0	0	3.31312e+06	3.26181e+07	0	3.37144e+07	2.49108e+07	0	2.87363e+07	1.7978e+07	0	2.25457e+07	2.31949e+07	0	1.97229e+07	1.7264e+07	0	7.14563e+07	3.60259e+07	0	5.43548e+07	2.96809e+07	0	2.99101e+07	3.5925e+07	0	1.52239e+07	2.01187e+07	0	3.34957e+07	2.67329e+07	0	1.46281e+07	3.43379e+07	0	0
Q9QY01	544	0.927654	11.2479	91.856	K	APTLTDIYQNKQKLRKQHSDPVCPSHAGAGY	K(0.928)QH(0.001)SDPVCPSH(0.07)AGAGYSYSPQPSRPGSLGTSPTK(0.002)	0	0	0	0	0	0	0	0	0	0	0	0	0	0	0	4.07237e+06	0	0	0	0	0	0	0	0	0	0	0	0	0	0	0	0	0	0	0	0
Q9QYB5	572	0.999985	48.1089	74.3	K	LLEGELEEYTKTIERKQQGLDDAEQGSLSDD	K(1)QQGLDDAEQGSLSDDAASVSQIQSQTQSPQSVPER	0	0	0	6.45702e+06	0	0	0	0	0	0	0	0	0	0	0	0	0	0	0	0	0	0	0	0	0	0	0	0	0	0	0	0	0	0	0	0
Q9QYB8	682	0.780804	7.29876	87.21	K	QMTTNADTDGDSYKDKTESVTSGPLSPEGSP	GLGQMTTNADTDGDSYK(0.145)DK(0.781)TESVTSGPLSPEGSPSK(0.074)	7.99718e+06	0	0	0	0	0	0	0	0	0	0	0	0	0	0	0	0	0	1.88316e+07	0	0	0	0	0	0	0	0	0	0	0	1.33143e+07	0	0	0	0	0
Q9QYB8	703	0.610104	1.99277	224.12	K	SGPLSPEGSPSKSPSKKKKKFRTPSFLKKSK	TESVTSGPLSPEGSPSK(0.004)SPSK(0.61)K(0.386)	0	0	0	0	0	0	0	0	0	2.01554e+07	0	0	2.0086e+07	0	0	0	0	0	2.76041e+07	0	0	0	0	0	0	0	0	0	0	0	0	0	0	0	0	0
Q9QYB8	680	0.588555	2.566	68.938	K	LGQMTTNADTDGDSYKDKTESVTSGPLSPEG	GLGQMTTNADTDGDSYK(0.589)DK(0.085)TESVTSGPLSPEGSPSK(0.326)	8.32863e+06	0	0	0	0	0	0	0	0	0	0	0	0	0	0	0	0	0	0	0	0	0	0	0	0	0	0	0	0	0	0	0	0	0	0	0
Q9QYB8	527	0.999813	37.2673	87.532	K	SAGPQSQLLASVIAEKSRSPSTESQLMSKGD	SAGPQSQLLASVIAEK(1)SR(0.999)SPSTESQLMSK(0.001)	0	0	0	0	4.08856e+07	0	0	2.52663e+07	0	0	4.04336e+07	0	0	3.92402e+07	0	0	4.06278e+07	0	0	6.74698e+07	0	0	3.88136e+07	0	0	0	0	0	5.12466e+07	0	0	4.83491e+07	0	0	6.89637e+07	0
Q9QYC0	599	1	63.6858	65.165	K	KGSEENLDETREQKEKSPPDQSAVPNTPPST	EK(1)SPPDQSAVPNTPPSTPVK(1)LEEDLPQEPTSR	1.21968e+07	6.83902e+07	0	1.15493e+07	3.93661e+07	0	1.12738e+07	3.25364e+07	0	7.87292e+06	2.11591e+07	0	6.20206e+06	2.76958e+07	0	0	2.94475e+07	0	5.83184e+06	4.5495e+07	0	0	4.82371e+07	0	1.39621e+07	3.74996e+07	0	0	3.27869e+07	0	0	0	0	7.01609e+06	2.91428e+07	0
Q9QYC0	617	0.999992	51.1631	89.055	K	PDQSAVPNTPPSTPVKLEEDLPQEPTSRDDS	EK(1)SPPDQSAVPNTPPSTPVK(1)LEEDLPQEPTSR	1.35752e+07	6.83902e+07	0	2.05373e+07	3.93661e+07	0	1.21442e+07	3.25364e+07	0	0	2.11591e+07	0	7.26111e+06	2.76958e+07	0	7.68356e+06	2.94475e+07	0	2.97038e+07	4.5495e+07	0	0	4.82371e+07	0	0	3.74996e+07	0	1.27193e+07	3.27869e+07	0	0	0	0	7.74965e+06	2.91428e+07	0
Q9QYC0	406	1	85.3145	124.35	K	TGYPYRYPALRERSKKYSDVEVPASVTGHSF	K(1)YSDVEVPASVTGHSFASDGDSGTCSPLR	2.70819e+07	0	0	3.18789e+07	0	0	2.83368e+07	0	0	0	0	0	1.81987e+07	0	0	1.85141e+07	0	0	0	0	0	6.79263e+07	0	0	4.2109e+07	0	0	3.39999e+07	0	0	0	0	0	2.30013e+07	0	0
Q9QYC0	405	0.586577	1.51992	113.64	K	RTGYPYRYPALRERSKKYSDVEVPASVTGHS	SK(0.587)K(0.413)YSDVEVPASVTGHSFASDGDSGTCSPLR	1.39731e+07	0	0	0	0	0	0	0	0	9.78792e+06	0	0	0	0	0	9.96327e+06	0	0	0	0	0	0	0	0	0	0	0	0	0	0	0	0	0	0	0	0
Q9QYC0	369	1	78.0093	102.97	K	RSPGTPAGEGSGSPPKWQIGEQEFEALMRML	SPGTPAGEGSGSPPK(1)WQIGEQEFEALMR	5.58093e+07	0	0	5.68978e+07	0	0	5.94438e+07	0	0	3.25955e+07	0	0	2.9362e+07	0	0	3.1588e+07	0	0	8.18579e+07	0	0	1.12452e+08	0	0	1.26932e+08	0	0	1.26753e+07	0	0	8.09046e+07	0	0	2.18877e+07	0	0
Q9QYR6	1193	0.882608	8.76128	78.913	K	PEDTQSLSFSEESPSKETSLDISSKQLSPES	DLWPMVSPEDTQSLSFSEESPSK(0.883)ETSLDISSK(0.117)	2.9847e+07	0	0	0	0	0	0	0	0	0	0	0	0	0	0	1.95624e+07	0	0	6.47295e+07	0	0	6.34103e+07	0	0	0	0	0	5.06117e+07	0	0	4.34768e+07	0	0	4.47319e+07	0	0
Q9QYR6	539	1	122.421	145.94	K	ALSSPEDLTQDFEELKREERGLLAEPRDTEL	ELALSSPEDLTQDFEELK(1)R	2.58772e+07	0	0	1.7871e+07	0	0	1.16278e+07	0	0	2.27758e+07	0	0	1.86181e+07	0	0	1.74729e+07	0	0	0	0	0	7.8922e+07	0	0	5.43881e+07	0	0	0	0	0	3.20967e+07	0	0	1.69836e+07	0	0
Q9QYR6	907	0.999912	40.5573	131.96	K	GTISPTSSLEEDKGFKSPPCEDFSVTGESEK	GFK(1)SPPCEDFSVTGESEK	0	0	0	5.55814e+06	0	0	0	0	0	0	0	0	5.00951e+06	0	0	9.91341e+06	0	0	0	0	0	0	0	0	0	0	0	0	0	0	0	0	0	0	0	0
Q9QYR6	1309	0.994498	24.6561	75.275	K	TGPGGHFMTSDSSLTKSPESLSSPAMEDLAM	H(0.003)SPGEITGPGGH(0.02)FMTSDSSLTK(0.994)SPESLSSPAMEDLAMEWGGK(0.983)	0	0	0	5.01701e+07	0	0	1.61732e+08	0	0	0	0	0	1.37598e+08	5.98574e+06	0	0	0	0	1.23037e+08	0	0	3.0373e+08	0	0	7.09508e+07	0	0	143001901	0	0	0	0	0	8.23875e+07	0	0
Q9QYR6	1287	0.999995	52.7169	243.16	K	LPGSSFSHSALSGDRKHSPGEITGPGGHFMT	K(1)HSPGEITGPGGHFMTSDSSLTK	3.27284e+08	0	0	4.0127e+08	0	0	2.03095e+08	0	0	2.51824e+08	0	0	3.05754e+08	0	0	3.32579e+08	0	0	4.44568e+08	0	0	2.52962e+08	0	0	2.91617e+08	0	0	4.65971e+08	0	0	5.15107e+08	0	0	4.10328e+08	0	0
Q9QYR6	105	0.972321	15.4566	114.55	K	IGADNLPGINGLLQRKVAELEEEQSQGSSSY	K(0.972)VAELEEEQSQGSSSYSDWVK(0.028)	0	0	0	0	0	0	0	0	0	0	0	0	0	0	0	7.95267e+06	0	0	0	0	0	0	0	0	0	0	0	0	0	0	0	0	0	0	0	0
Q9QYR6	1121	1	45.8013	88.95	K	SLPGEVRTQEPAEPQKDELLGFTDQSFSPED	TQEPAEPQK(1)DELLGFTDQSFSPEDAESLSVLSVVSPDTAK(1)	0	0	0	1.52318e+07	0	0	8.37241e+06	7.55783e+06	0	0	0	0	9.35922e+06	1.16546e+07	0	0	1.2887e+07	0	6.69422e+07	0	0	0	1.27398e+07	0	0	1.06086e+07	0	0	3.46447e+07	0	4.17125e+07	2.33829e+07	0	0	1.35089e+07	0
Q9QYR6	2196	0.999636	34.8893	99.236	K	GTPTRTRHDEYLEVTKAPSLDSSLPQLPSPS	TRHDEYLEVTK(1)APSLDSSLPQLPSPSSPGAPLLSNLPR	0	0	0	4.84607e+07	0	0	3.00219e+07	0	0	0	0	0	3.44235e+07	0	0	0	0	0	2.17405e+07	0	0	0	0	0	5.94347e+07	0	0	2.62049e+07	0	0	0	0	0	0	0	0
Q9QYR6	1795	0.991206	20.5199	88.709	K	RVPSAPGQESPVPDTKSTPPTRNEPTTPSWL	VPSAPGQESPVPDTK(0.991)STPPTR(0.009)	0	0	0	0	0	0	0	0	0	0	0	0	0	0	0	6.43942e+06	0	0	0	0	0	0	0	0	0	0	0	0	0	0	0	0	0	0	0	0
Q9QYX7	2920	0.994464	22.5626	75.533	K	YDRSGPYGYRGIGGMKPSMSDTNLAEAGHFF	GIGGMK(0.994)PSMSDTNLAEAGHFFYK(0.006)	0	0	0	0	0	0	6.60224e+06	0	0	6.91559e+06	0	0	0	0	0	0	0	0	7.20313e+06	0	0	6.89166e+06	0	0	6.15436e+06	0	0	5.36591e+06	0	0	0	0	0	0	0	0
Q9QYX7	2500	0.884345	10.9538	101.17	K	YKLPSPTSPLSPHSNKSSPRYSKSLMETYVV	LPSPTSPLSPH(0.071)SNK(0.884)SSPR(0.045)	1.68316e+06	0	0	0	0	0	0	0	0	0	0	0	0	0	0	0	0	0	0	0	0	3.08156e+06	0	0	4.32055e+06	0	0	0	0	0	6.29697e+06	0	0	0	0	0
Q9QYX7	1722	0.550509	1.04958	57.738	K	DSSEEEELREEEELLKEQEKQRELEQQQRKS	SHGPLLPTIEDSSEEEELR(0.432)EEEELLK(0.551)EQEK(0.017)	0	0	0	0	0	0	0	0	0	0	0	0	1.98543e+07	0	0	0	0	0	0	0	0	0	0	0	0	0	0	0	0	0	0	0	0	0	0	0
Q9QYX7	4776	0.965937	14.5267	296.51	K	EHGKSHSSQNSQQSPKPSVIKSRSHGIFPDP	SHSSQNSQQSPK(0.966)PSVIK(0.034)	1.12806e+07	0	0	0	0	0	0	0	0	0	0	0	0	0	0	0	0	0	8.97044e+06	0	0	0	0	0	9.83489e+06	0	0	0	0	0	1.12111e+07	0	0	0	0	0
Q9QYX7	253	0.972596	15.5296	101.05	K	SQQAEKTKPQAPGTAKPSQQSPAQTPAQQAK	TKPQAPGTAK(0.973)PSQQSPAQTPAQQAK(0.027)	2.42746e+06	0	0	1.62651e+06	0	0	0	0	0	0	0	0	0	0	0	0	0	0	0	0	0	0	0	0	0	0	0	0	0	0	0	0	0	0	0	0
Q9QZQ1	1186	0.684719	3.36815	71.78	K	RSSPNVANQPPSPGGKGPYTSGTAAKITSVS	SSPNVANQPPSPGGK(0.685)GPYTSGTAAK(0.315)	0	0	0	9.41982e+06	0	0	0	0	0	9.12938e+06	0	0	1.11895e+07	0	0	0	0	0	1.03627e+07	0	0	0	0	0	0	0	0	0	0	0	0	0	0	0	0	0
Q9R078	195	0.52958	0.515309	68.96	K	SSSPPGPYHQEPYMSKPEERFKAPPILPPHL	CSDVSELSSSPPGPYH(0.47)QEPYMSK(0.53)PEER	1.24549e+07	0	0	0	0	0	0	0	0	0	0	0	0	0	0	0	0	0	0	0	0	0	0	0	0	0	0	0	0	0	0	0	0	0	0	0
Q9R0K7	1112	0.999997	55.6782	170.78	K	RVVKAFRSSLYEGLEKPESRTSIHNFMAHPE	AFRSSLYEGLEK(1)PESR	1.24694e+07	0	0	1.4807e+07	0	0	8.88591e+06	0	0	0	0	0	3.81035e+06	0	0	0	0	0	0	0	0	1.37296e+07	0	0	1.75798e+07	0	0	6.65531e+06	0	0	5.02051e+06	0	0	5.89257e+06	0	0
Q9R0K7	1152	0.999788	36.7493	135.08	K	IPLIDDTDLEEDAALKQNSSPPSSLNKNNSA	IEDSQPHIPLIDDTDLEEDAALK(1)QNSSPPSSLNK	4.18508e+07	0	0	3.83717e+07	0	0	3.73979e+07	0	0	1.67588e+07	0	0	1.59131e+07	0	0	1.66484e+07	0	0	4.27496e+07	0	0	5.29874e+07	0	0	2.87926e+07	0	0	2.43791e+07	0	0	2.80876e+07	0	0	1.60766e+07	0	0
Q9R0Q7	107	1	87.7277	138.25	K	ERAKLNWLSVDFNNWKDWEDDSDEDMSNFDR	LNWLSVDFNNWK(1)DWEDDSDEDMSNFDR	1476609579	0	0	1110351639	0	0	1157485523	0	0	1410061488	0	0	1920476464	0	0	1719804314	0	0	1582862368	0	0	1443639059	0	0	1482283677	0	0	1968690751	0	0	1697708061	0	0	2307948235	0	0
Q9R112	418	0.866789	8.24766	56.055	K	FPFDQSKERITMYLMKADMMPFLYWNMMLRG	ER(0.133)ITMYLMK(0.867)ADMMPFLYWNMMLR	0	0	0	0	0	0	0	0	0	0	0	0	0	0	0	0	0	0	0	0	0	0	0	0	0	0	0	0	0	0	0	0	0	1.12654e+07	0	0
Q9WTQ5	266	0.995455	23.7485	76.221	K	EAAKDGEENREKEPTKPLESPTSPVSNETTS	EK(0.004)EPTK(0.995)PLESPTSPVSNETTSSFK	0	0	0	0	0	0	0	0	0	0	7.23963e+06	0	0	8.67217e+06	0	0	9.80698e+06	0	0	0	0	0	0	0	0	0	0	0	0	0	0	0	0	8.62801e+06	0	0
Q9WV55	205	0.675397	3.18208	151.59	K	SEENRHLRDEGLRLRKVAHSDKPGSTSAVSF	K(0.675)VAHSDK(0.325)PGSTSAVSFR	0	0	0	0	0	0	0	0	0	0	0	0	0	0	0	0	0	0	0	0	0	0	0	0	0	0	0	0	0	0	0	0	0	0	0	0
Q9WV55	211	0.920446	10.6336	152.94	K	LRDEGLRLRKVAHSDKPGSTSAVSFRDNVTS	VAH(0.08)SDK(0.92)PGSTSAVSFR	1.44561e+07	0	0	1.87704e+07	0	0	2.46328e+07	0	0	0	0	0	0	0	0	2.10644e+07	0	0	0	0	0	0	0	0	1.76373e+07	0	0	9.33177e+06	0	0	0	0	0	1.16013e+07	0	0
Q9WV92	498	0.608347	1.91249	178.99	K	KGISQTNLITTVTPEKKAEEERVEEEDRRKK	GISQTNLITTVTPEK(0.608)K(0.392)	1.08364e+08	0	0	1.94442e+08	0	0	7.30264e+06	0	0	1.69537e+08	0	0	1.59384e+08	0	0	1.98352e+07	0	0	1.95079e+08	0	0	1.23204e+07	0	0	2.11087e+07	0	0	1.32534e+08	0	0	0	0	0	0	0	0
Q9WV92	67	0.994257	22.4144	90.06	K	ALEQFPEAAAHSTPVKREIGDKDRDFAAAAA	QQPALEQFPEAAAH(0.006)STPVK(0.994)R	5.32545e+06	0	0	0	0	0	0	0	0	0	0	0	0	0	0	0	0	0	0	0	0	0	0	0	0	0	0	0	0	0	0	0	0	0	0	0
Q9Z0J4	285	0.990742	20.2946	118.23	K	LNNPYSENEQSPASGKQSPTKNGSPSRCPRF	GNVPVVLNNPYSENEQSPASGK(0.991)QSPTK(0.009)	4.43543e+07	0	0	5.49691e+07	0	0	2.98348e+07	0	0	5.05718e+07	0	0	4.12116e+07	0	0	5.12594e+07	0	0	5.08798e+07	0	0	8.13893e+07	0	0	6.51335e+07	0	0	3.59912e+07	0	0	2.9662e+07	0	0	4.12688e+07	0	0
Q9Z0T6	451	1	79.5139	79.514	K	TLRHPVVINHGPRVGKCKINPASGISMVTKF	VGK(1)CK(1)INPASGISMVTK(1)	0	0	0	0	0	0	0	0	0	0	0	1.09968e+07	0	0	4.48541e+06	0	0	1.0105e+07	0	0	0	0	0	0	0	0	0	0	0	9.10309e+06	0	0	0	0	0	0
Q9Z0T6	453	1	79.5139	79.514	K	RHPVVINHGPRVGKCKINPASGISMVTKFAV	VGK(1)CK(1)INPASGISMVTK(1)	0	0	0	0	0	0	0	0	0	0	0	1.09968e+07	0	0	4.48541e+06	0	0	1.0105e+07	0	0	0	0	0	0	0	0	0	0	0	9.10309e+06	0	0	0	0	0	0
Q9Z0U1	98	1	104.073	207.21	K	RKSGKIAAIVVKRPRKVQVAPLQGSPPLSHD	K(1)VQVAPLQGSPPLSHDDR	1.65133e+07	0	0	3.32911e+07	0	0	2.15787e+07	0	0	3.08603e+07	0	0	3.357e+07	0	0	2.5886e+07	0	0	1.48511e+07	0	0	3.64068e+07	0	0	8.01862e+07	0	0	2.20994e+07	0	0	4.95631e+07	0	0	3.37397e+07	0	0
Q9Z1K7	1202	0.979533	16.7997	70.345	K	ELPDSPGQTMPPSRSKTPPAPPGQPETSQFS	SK(0.98)TPPAPPGQPETSQFSLQWESYVK(0.02)	0	0	0	0	0	0	0	0	0	0	0	0	0	0	0	0	0	0	0	0	0	1.37731e+07	0	0	2.83051e+07	0	0	0	0	0	0	0	0	0	0	0
Q9Z2D6	61	0.87424	9.79458	48.535	K	LQPSAHHSAEPAEAGKAETSESSGSAPAVPE	EGK(0.001)HEPLQPSAH(0.018)H(0.015)SAEPAEAGK(0.874)AETSESSGSAPAVPEASASPK(0.092)	0	0	0	0	0	0	2.51582e+06	0	0	0	0	0	0	0	0	1.02978e+07	0	0	0	0	0	0	0	0	0	0	0	0	0	0	0	0	0	0	0	0
Q9Z2H2	231	0.99951	33.1005	97.304	K	DIRKCRRLKNPQKVKKSVYGVTDETQSQSPV	K(1)SVYGVTDETQSQSPVHIPSQPIR	1.46651e+07	0	0	2.81046e+07	0	0	1.94375e+07	0	0	0	0	0	6.8337e+06	0	0	8.74472e+06	0	0	1.44562e+07	0	0	1.54279e+07	0	0	0	0	0	0	0	0	0	0	0	5.68207e+06	0	0
Q9Z2H5	66	0.972989	16.1323	74.3	K	QQDTRPAEQSLDMDDKDYSEADGLSERTTPS	H(0.003)LTQQDTR(0.024)PAEQSLDMDDK(0.973)DYSEADGLSER	1.76945e+07	0	0	0	0	0	0	0	0	0	0	0	3.45565e+07	0	0	3.1621e+07	0	0	0	0	0	0	0	0	0	0	0	1.02032e+07	0	0	0	0	0	1.60217e+07	0	0
Q9Z2Q6	232	1	69.9915	130.69	K	VYQFPECDSDEDEDFKQQDRELKESAPFAVI	FGIHVYQFPECDSDEDEDFK(1)QQDR	9.22405e+07	0	0	9.307e+07	0	0	6.70859e+07	0	0	6.18107e+07	0	0	9.53955e+07	0	0	7.96786e+07	0	0	9.97579e+07	0	0	9.28264e+07	0	0	6.90966e+07	0	0	5.68144e+07	0	0	8.96706e+07	0	0	3.23754e+07	0	0
Q9Z2Q6	17	0.997712	26.3964	100.76	K	STGLRYKSKLATPEDKQDIDKQYVGFATLPN	LATPEDK(0.998)QDIDK(0.002)QYVGFATLPNQVHR	8.20408e+07	0	0	9.10471e+07	0	0	8.53712e+07	0	0	156237526	0	0	1.37916e+08	0	0	1.40442e+08	0	0	1.46111e+08	0	0	2.44575e+08	0	0	1.34811e+08	0	0	1.89007e+08	0	0	1.81464e+08	0	0	207237856	0	0
Q9Z2Q6	22	0.601679	1.79132	64.028	K	YKSKLATPEDKQDIDKQYVGFATLPNQVHRK	LATPEDK(0.398)QDIDK(0.602)QYVGFATLPNQVHR	0	0	0	0	0	0	0	0	0	0	0	0	3.67931e+07	0	0	0	0	0	0	0	0	0	0	0	0	0	0	0	0	0	0	0	0	0	0	0
A0A0M3U1B0	13	0.918978	11.5025	57.238	H	___MSTLQSLIIDGFHGNGFHMIEEYLQQKE	MSTLQSLIIDGFH(0.919)GNGFH(0.065)MIEEYLQQK(0.016)	0	0	0	0	0	0	5.27423e+06	0	0	0	0	0	8.0016e+06	0	0	1.63037e+07	0	0	0	0	0	0	0	0	0	0	0	0	0	0	0	0	0	1.31467e+07	0	0
A1L3P4	699	0.781982	5.54705	83.948	H	MDDSEPALNSLDDTRHSPA____________	LVLPMDDSEPALNSLDDTR(0.218)H(0.782)SPA	0	0	0	1.16746e+07	0	0	6.57332e+06	0	0	0	0	0	1.18365e+07	0	0	8.81957e+06	0	0	0	0	0	8.81406e+06	0	0	0	0	0	0	0	0	3.19135e+07	0	0	1.945e+07	0	0
A2A690	1497	0.630546	4.53206	59.038	H	TRQGYQSTSPALSPTHQNSHYRPSPPHTSPA	QGYQSTSPALSPTH(0.631)QNSH(0.222)YR(0.082)PSPPH(0.064)TSPAH(0.002)QGASYR	1.95809e+07	0	0	0	0	0	0	0	0	3.7201e+06	0	0	0	0	0	0	0	0	0	0	0	0	0	0	0	0	0	0	0	0	0	0	0	0	0	0
A2A690	1501	0.469353	0	52.549	H	YQSTSPALSPTHQNSHYRPSPPHTSPAHQGA	QGYQSTSPALSPTH(0.469)QNSH(0.469)YR(0.054)PSPPH(0.007)TSPAHQGASYR	0	0	0	0	0	0	0	0	0	0	0	0	0	0	0	0	0	0	0	0	0	0	0	0	0	0	0	0	0	0	0	0	0	0	0	0
A2A699	374	1	65.7034	81.384	H	PSDNKRDQATSMSQLHLICGGPLEPTSSGDP	DQATSMSQLH(1)LICGGPLEPTSSGDPEAPPPGSLHSAFSSSR	7.09622e+06	0	0	0	0	0	9.98295e+06	0	0	0	0	0	0	0	0	0	0	0	1.47626e+07	0	0	0	0	0	0	0	0	0	0	0	0	0	0	1.15092e+07	0	0
A2A699	471	0.998828	29.325	104.95	H	LDEYRRGPAGAAAFLHEPPSPPPSFDHYLGH	GPAGAAAFLH(0.999)EPPSPPPSFDHYLGHK(0.001)	6.31747e+07	0	0	4.38718e+07	0	0	2.5387e+07	0	0	0	0	0	1.22747e+08	0	0	5.88891e+07	0	0	9.96672e+07	0	0	1.30256e+08	0	0	192136475	0	0	8.82257e+07	0	0	1.75729e+08	0	0	1.52308e+08	0	0
A2ALK8	393	0.999957	43.6431	69.084	H	NWRSPRLRHEIRKPRHSSADNLANEMTYITE	H(1)SSADNLANEMTYITETEDVFYTYK	0	0	0	4.04943e+06	0	0	6.22304e+06	0	0	0	0	0	0	0	0	0	0	0	0	0	0	1.05327e+07	0	0	6.15495e+06	0	0	9.93045e+06	0	0	5.70972e+06	0	0	0	0	0
A2AN08	2886	0.999998	58.6529	70.637	H	TAATDGSTLRTSPADHGGSVGSESGGSAVDS	TSPADH(1)GGSVGSESGGSAVDSVAGEHSVSGR	0	0	0	6.5759e+06	0	0	0	0	0	0	0	0	0	0	0	0	0	0	0	0	0	0	0	0	0	0	0	0	0	0	0	0	0	0	0	0
A2AQ25	308	0.98958	21.0723	79.991	H	DGLVAPRPGSVAHPPHVIPNSPPSTPVPHSL	GDGLVAPR(0.001)PGSVAH(0.002)PPH(0.99)VIPNSPPSTPVPH(0.008)SLPPSPSR	4.76066e+07	0	0	5.91977e+07	0	0	2.22733e+07	0	0	3.96703e+07	0	0	3.92565e+07	0	0	4.21027e+07	0	0	1.18963e+08	0	0	9.24982e+07	0	0	6.10105e+07	0	0	8.26863e+07	0	0	4.98774e+07	0	0	2.47426e+07	0	0
A2AQ25	321	0.934663	15.0525	60.797	H	PPHVIPNSPPSTPVPHSLPPSPSRIPYGGSR	PGSVAH(0.029)PPH(0.029)VIPNSPPSTPVPH(0.935)SLPPSPSR(0.007)	0	0	0	2.45528e+07	0	0	0	0	0	0	0	0	0	0	0	7.84135e+06	0	0	2.25132e+07	0	0	1.6494e+07	0	0	0	0	0	8.1479e+06	0	0	2.60052e+06	0	0	1.75013e+07	0	0
A2AQ25	864	0.960014	13.8039	117.6	H	LKHQEETAHAPGQPLHCSTGSPGDVKSEVVP	HQEETAHAPGQPLH(0.96)CSTGSPGDVK(0.04)	1.18792e+07	0	0	2.81132e+07	0	0	1.86639e+07	0	0	1.0607e+07	0	0	1.10132e+07	0	0	1.02799e+07	0	0	6.32997e+06	0	0	9.14965e+06	0	0	0	0	0	0	0	0	0	0	0	0	0	0
A2BH40	361	0.613657	2.00953	137.95	H	AAAAAVSGGAQQRSHHAPMSPGSSGGGGQPL	SH(0.386)H(0.614)APMSPGSSGGGGQPLAR	0	0	0	0	0	0	0	0	0	0	0	0	0	0	0	0	0	0	0	0	0	0	0	0	0	0	0	0	0	0	0	0	0	0	0	0
A6H8H5	521	0.49672	0	57.432	H	KSYENKYQEVSQNDSHEHLNNTSSSSPQHLS	YQEVSQNDSH(0.497)EH(0.497)LNNTSSSSPQH(0.005)LSAQK(0.002)	0	0	0	0	0	0	0	0	0	0	0	0	0	0	0	0	0	0	0	0	0	0	0	0	0	0	0	0	0	0	0	0	0	0	0	0
A6H8H5	523	0.49672	0	57.432	H	YENKYQEVSQNDSHEHLNNTSSSSPQHLSAQ	YQEVSQNDSH(0.497)EH(0.497)LNNTSSSSPQH(0.005)LSAQK(0.002)	0	0	0	0	0	0	0	0	0	0	0	0	0	0	0	0	0	0	0	0	0	0	0	0	0	0	0	0	0	0	0	0	0	0	0	0
B2RUJ5	314	1	110.978	189.99	H	EAEQDLERAPTPGGGHPDSPGLPAPAGQQQR	APTPGGGH(1)PDSPGLPAPAGQQQR	0	0	0	4.50801e+07	0	0	2.58655e+07	0	0	1.00541e+07	0	0	2.03561e+07	0	0	2.08855e+07	0	0	1.33351e+07	0	0	0	0	0	0	0	0	0	0	0	1.83274e+07	0	0	0	0	0
E9PUL5	207	0.999949	42.9329	71.524	H	PLQAGDGEEGPAPQPHSPPSTKTPPANGAPP	QENGAVVPLQAGDGEEGPAPQPH(1)SPPSTK(0.999)TPPANGAPPR(0.001)	0	8.81233e+06	0	1.52567e+07	0	0	0	8.29043e+06	0	1.51172e+07	0	0	0	0	0	0	9.22519e+06	0	0	0	0	0	0	0	0	1.15066e+07	0	0	0	0	0	0	0	0	0	0
E9PWZ3	208	0.999989	49.5143	68.525	H	KVAWVQARMEKQVPVHSVFSQSEVIDVIAVT	QVPVH(1)SVFSQSEVIDVIAVTK	0	0	0	0	0	0	0	0	0	1.54769e+07	0	0	0	0	0	0	0	0	6.2114e+06	0	0	0	0	0	0	0	0	0	0	0	0	0	0	0	0	0
E9Q0S6	516	0.499704	0	78.607	H	SDPLIRWDSYDNFSGHREDGMEEVVGHTQGP	WDSYDNFSGH(0.5)R(0.5)EDGMEEVVGHTQGPLDGSLYAK	0	0	0	0	0	0	0	0	0	0	0	0	0	0	0	0	0	0	0	0	0	0	0	0	0	0	0	0	0	0	0	0	0	0	0	0
E9Q0S6	527	0.431976	1.92283	53.073	H	NFSGHREDGMEEVVGHTQGPLDGSLYAKVKK	WDSYDNFSGH(0.277)R(0.277)EDGMEEVVGH(0.432)TQGPLDGSLYAK(0.013)	0	0	0	0	0	0	0	0	0	0	0	0	0	0	0	0	0	0	0	0	0	0	0	0	0	0	0	0	0	0	0	0	0	0	0	0
E9Q5K9	421	0.523369	0.586358	83.606	H	ESGKFQGFARLSSESHHGGSPIHWVLPAGMS	LSSESH(0.523)H(0.457)GGSPIH(0.018)WVLPAGMSAK(0.001)	5.31881e+07	0	0	6.22049e+07	0	0	5.61803e+06	0	0	7.81866e+07	0	0	6.12046e+06	0	0	3.12982e+07	0	0	4.45918e+06	0	0	0	0	0	0	0	0	5.12544e+06	0	0	0	0	0	0	0	0
E9Q5K9	422	0.967976	17.5669	100.47	H	SGKFQGFARLSSESHHGGSPIHWVLPAGMSA	LSSESH(0.017)H(0.968)GGSPIH(0.014)WVLPAGMSAK(0.001)	7.68371e+07	0	0	6.22049e+07	0	0	6.15358e+07	0	0	7.81866e+07	0	0	6.12046e+06	0	0	3.12982e+07	0	0	4.45918e+06	0	0	0	0	0	6.00508e+07	0	0	5.12544e+06	0	0	6.59161e+07	0	0	8.72707e+07	0	0
E9Q6B2	220	0.477146	0	58.168	H	DGSSTSSAGSGGSPDHHHHVPAALLPPGPHK	DVGDGSSTSSAGSGGSPDH(0.477)H(0.477)H(0.042)H(0.002)VPAALLPPGPHK(0.002)	0	0	0	0	0	0	0	0	0	0	0	0	0	0	0	0	0	0	0	0	0	0	0	0	0	0	0	0	0	0	0	0	0	0	0	0
E9Q6B2	221	0.477146	0	61.112	H	GSSTSSAGSGGSPDHHHHVPAALLPPGPHKV	DVGDGSSTSSAGSGGSPDH(0.477)H(0.477)H(0.042)H(0.002)VPAALLPPGPHK(0.002)	0	0	0	0	0	0	0	0	0	0	0	0	0	0	0	0	0	0	0	0	0	0	0	0	0	0	0	0	0	0	0	0	0	0	0	0
E9Q6B2	222	0.416209	0	61.112	H	SSTSSAGSGGSPDHHHHVPAALLPPGPHKVP	DVGDGSSTSSAGSGGSPDH(0.08)H(0.416)H(0.416)H(0.08)VPAALLPPGPHK(0.007)	0	0	0	0	0	0	0	0	0	0	0	0	0	0	0	0	0	0	0	0	0	0	0	0	0	0	0	0	0	0	0	0	0	0	0	0
E9Q6P5	165	0.998726	29.9973	102.07	H	LCLEKLPVSSSTSNLHVDREQDVITCYEKAG	LPVSSSTSNLH(0.999)VDR(0.001)EQDVITCYEK	0	0	0	0	0	0	2.14803e+07	0	0	3.4098e+07	0	0	2.4174e+07	0	0	2.07076e+07	0	0	0	0	0	3.64984e+07	0	0	2.91102e+07	0	0	0	0	0	0	0	0	5.78531e+07	0	0
E9QAT4	1388	0.997858	27.5278	86.738	H	RSTHSLPSRRSSLSSHSHQSQIYRSHHVTGG	R(0.002)SSLSSH(0.998)SHQSQIYR	0	0	0	3.04489e+07	0	0	1.54846e+07	0	0	1.34343e+07	0	0	1.31176e+07	0	0	8.00314e+06	0	0	1.42134e+07	0	0	1.2617e+07	0	0	2.53621e+07	0	0	1.57511e+07	0	0	9.70736e+06	0	0	0	0	0
F6SEU4	1002	0.874298	9.81047	71.765	H	DLSSGVPKPPAASILHSHSYSDEFGPSGTDF	SEDLSSGVPK(0.034)PPAASILH(0.874)SH(0.091)SYSDEFGPSGTDFTR	0	0	0	0	0	0	0	0	0	0	0	0	0	0	0	0	0	0	0	0	0	0	0	0	0	2.35819e+07	0	0	0	0	6.31813e+06	0	0	0	0	0
F6SEU4	1004	0.985513	18.3968	115.05	H	SSGVPKPPAASILHSHSYSDEFGPSGTDFTR	SEDLSSGVPKPPAASILH(0.014)SH(0.986)SYSDEFGPSGTDFTR	1.07817e+07	0	0	3.98796e+07	0	0	3.09863e+07	0	0	0	0	0	2.86464e+07	0	0	1.2974e+07	0	0	0	0	0	3.91565e+07	0	0	0	2.35819e+07	0	0	0	0	0	0	0	21599820	0	0
F6SEU4	1160	1	109.529	200.63	H	MPASERTVAWVSNMPHLSADIESAHIEREEY	TVAWVSNMPH(1)LSADIESAHIER	3.57046e+08	0	0	3.15825e+08	0	0	269133457	0	0	9.52433e+07	0	0	1.38871e+08	0	0	1.52034e+08	0	0	2.59196e+08	0	0	4.03919e+08	0	0	3.94889e+08	0	0	2.58783e+07	0	0	7.30882e+07	0	0	1.82381e+08	0	0
G3X9K3	230	0.999982	47.7446	99.092	H	QEAKQMERERHRQQQHLLQSPVSHHEPESPH	QQQH(1)LLQSPVSHHEPESPHLR	2.06714e+07	0	0	4.88598e+07	0	0	5.47203e+07	0	0	4.28333e+07	0	0	4.10769e+07	0	0	4.20867e+07	0	0	0	0	0	2.3603e+07	0	0	7.50028e+07	0	0	4.48983e+07	0	0	6.26934e+07	0	0	4.1203e+07	0	0
G3X9K3	1534	0.795425	5.96286	54.581	H	KTCNCTLDIFKTTIPHALLTWRPTSGEAEPP	TTIPH(0.795)ALLTWR(0.202)PTSGEAEPPSPSAVSEK(0.002)PLDAISQK(0.001)	2.6347e+07	0	0	0	0	0	0	0	0	0	0	0	0	0	0	0	0	0	103235828	0	0	2.47252e+07	0	0	0	0	0	0	0	0	0	0	0	0	0	0
O08539	348	0.835944	7.22751	117.48	H	PSQLRKGPPVPPPPKHTPSKEMKQEQILSLF	KGPPVPPPPK(0.158)H(0.836)TPSK(0.006)	0	0	0	1.18901e+07	0	0	0	0	0	0	0	0	0	0	0	1.26172e+07	0	0	1.08484e+07	0	0	0	0	0	0	0	0	0	0	0	9.58149e+06	0	0	8.87565e+06	0	0
O08576	235	0.999879	41.4452	105.79	H	RHSAESSTSEDNSPEHPYLPLVTDEDSWYNK	HSAESSTSEDNSPEH(1)PYLPLVTDEDSWYNK	1.0289e+07	0	0	0	0	0	1.2534e+07	0	0	8.1317e+06	0	0	8.50571e+06	0	0	1.36535e+07	0	0	0	0	0	1.36407e+07	0	0	0	0	0	1.36142e+07	0	0	0	0	0	1.48995e+07	0	0
O08919	261	0.999998	56.5123	107.58	H	AAAAPAVAPGPAQPGHVSPTPATTSPGEKGE	AEAAAAPAVAPGPAQPGH(1)VSPTPATTSPGEK(1)GEAGTPVAAGTTAAAIPR	0	1.96245e+07	0	2.01522e+07	2.66505e+07	0	1.24185e+07	1.83442e+07	0	1.84202e+07	2.11591e+07	0	1.20038e+07	2.20509e+07	0	1.58969e+07	2.35047e+07	0	1.5423e+07	2.0431e+07	0	1.76502e+07	1.9932e+07	0	1.03953e+07	2.19712e+07	0	6.73407e+06	2.26455e+07	0	0	5.35551e+07	0	0	4.65722e+07	0
O09012	23	0.77239	5.74972	50.432	H	EGECGGANPLMKLATHFTQDKALRQEGLRPG	MAMR(0.007)ELVEGECGGANPLMK(0.208)LATH(0.772)FTQDK(0.013)	2.04182e+07	0	0	0	0	0	3.57709e+07	0	0	2.41985e+07	0	0	0	0	0	0	0	0	0	0	0	0	0	0	3.20389e+07	0	0	0	0	0	1.30365e+07	0	0	0	0	0
O35136	782	0.999866	41.307	73.761	H	EPIVEMRTEDERITNHEDGSPVNEPNETTPL	ITNH(1)EDGSPVNEPNETTPLTEPEKLPLKEENGK	0	0	0	1.23118e+07	0	0	8.97832e+06	0	0	0	0	0	9.3119e+06	0	0	9.497e+06	0	0	0	0	0	0	0	0	0	0	0	0	0	0	0	0	0	1.0904e+07	0	0
O35295	105	0.999872	38.9374	71.37	H	AVAAEFRDSLGDFIEHYAQLGPSSPEQLAAG	DSLGDFIEH(1)YAQLGPSSPEQLAAGAEEGGGPR	1.50996e+07	0	0	3.97606e+07	0	0	3.17539e+07	0	0	7.22632e+06	0	0	0	0	0	1.49836e+07	0	0	2.96846e+07	0	0	8.64599e+07	0	0	0	0	0	1.18756e+07	0	0	4.10086e+07	0	0	2.63159e+07	0	0
O35621	214	0.998279	27.6338	44.969	H	RYCLDSLDEDSFDIIHFFGNETSPGGNDFEI	YCLDSLDEDSFDIIH(0.998)FFGNETSPGGNDFEIYADPR(0.002)	4.2895e+06	0	0	0	0	0	1.05218e+07	0	0	4.56229e+06	0	0	0	0	0	3.55623e+06	0	0	9.39369e+06	0	0	0	0	0	7.88237e+06	0	0	1.09481e+07	0	0	0	0	0	0	0	0
O35874	512	0.946347	12.4646	73.341	H	IPNSKSEEETSPLVTHQNPAGPVAIAPELES	SEEETSPLVTH(0.946)QNPAGPVAIAPELESK(0.054)	1.50429e+07	0	0	0	0	0	0	0	0	0	0	0	0	0	0	0	0	0	0	0	0	0	0	0	0	0	0	0	0	0	2.51681e+07	0	0	2.23737e+07	0	0
O35927	687	0.807513	7.61584	78.221	H	IQDALAVLTNAVIIPHSGWENSPLQDDRKIQ	MPIIQDALAVLTNAVIIPH(0.808)SGWENSPLQDDR(0.053)K(0.14)	0	0	0	0	0	0	1.56314e+06	0	0	3.34403e+06	0	0	0	0	0	0	0	0	0	0	0	0	0	0	4.59228e+06	0	0	6.28169e+06	0	0	0	0	0	4.6696e+06	0	0
O35927	1238	1	100.376	100.38	H	YSAARPYSELNYETSHYPASPDSWV______	PYSELNYETSH(1)YPASPDSWV	0	0	0	7.96876e+06	0	0	0	0	0	0	0	0	5.01995e+06	0	0	0	0	0	0	0	0	0	0	0	0	0	0	0	0	0	1.03047e+07	0	0	7.33957e+06	0	0
O35927	473	1	93.6897	100.38	H	SPGVDSVPLQRTGSQHGPQNAAAATFQRASY	TGSQH(1)GPQNAAAATFQR	0	0	0	2.42346e+07	0	0	9.3122e+06	0	0	8.30977e+06	0	0	1.02707e+07	0	0	1.63816e+07	0	0	1.87023e+07	0	0	0	0	0	3.51834e+06	0	0	0	0	0	0	0	0	0	0	0
O54781	480	0.869021	8.21829	45.842	H	SEGSPLTEQEESSPSHDRSRTVSASSTGDLP	TSEFPTPLFSGPLEPVACGSVISEGSPLTEQEESSPSH(0.869)DR(0.131)	1.0289e+07	0	0	1.04593e+07	0	0	0	0	0	0	0	0	8.57262e+06	0	0	6.96336e+06	0	0	1.63296e+07	0	0	0	0	0	0	0	0	0	0	0	0	0	0	0	0	0
O54818	170	1	87.2026	140.42	H	ETTVASLKTKVGGTNHGGGSFEEVLNSTAHA	VGGTNH(1)GGGSFEEVLNSTAHASSQNASAGSR	1.21767e+07	0	0	1.36687e+07	0	0	12970754	0	0	3.06628e+07	0	0	2.81242e+07	0	0	2.1634e+07	0	0	0	0	0	1.75483e+07	0	0	2.54936e+07	0	0	0	0	0	2.34931e+07	0	0	1.97232e+07	0	0
O54829	240	0.880112	8.65772	123.61	H	KTRKSVYGLQNDIRSHSPTHTPTPETKPPTE	SH(0.88)SPTH(0.12)TPTPETKPPTEDELHQQIK	1.58532e+08	0	0	2.45031e+08	0	0	0	0	0	1.58384e+08	0	0	1.69461e+08	0	0	0	0	0	0	0	0	0	0	0	2.76843e+08	0	0	0	0	0	2.17466e+08	0	0	0	0	0
O54829	244	0.993536	22.3832	143.72	H	SVYGLQNDIRSHSPTHTPTPETKPPTEDELH	SH(0.006)SPTH(0.994)TPTPETKPPTEDELHQQIK	1.91809e+08	0	0	2.67539e+08	0	0	2.35186e+08	0	0	1.29862e+08	0	0	1.44493e+08	0	0	1.61648e+08	0	0	260358988	0	0	2.68321e+08	0	0	3.42675e+07	0	0	1.70244e+08	0	0	2.52589e+08	0	0	3.40493e+08	0	0
O54916	176	1	83.7329	83.733	H	VSPVVSPQQSPPTSPHTWRKHSRHPSGGNSE	PSAEQQEPVSPVVSPQQSPPTSPH(1)TWR(1)	0	0	0	0	8.23408e+06	0	0	0	0	0	6.35708e+06	0	0	1.08777e+07	0	0	6.46411e+06	0	0	0	0	0	0	0	0	0	0	0	0	0	0	0	0	0	0	0
O54916	535	0.999998	60.9503	91.592	H	SDPEQIGSSVTRQRSHSGTSPDNTAPPPPPP	SH(1)SGTSPDNTAPPPPPPRPQPSHSR	1.78025e+08	0	0	240276640	0	0	1.62619e+08	0	0	113101991	0	0	1.14759e+08	0	0	1.75228e+08	0	0	1.52607e+08	0	0	1.61019e+08	0	0	1.14249e+08	0	0	1.6217e+08	0	0	2.34208e+08	0	0	2.07942e+08	0	0
O54931	34	0.999971	46.5224	104.26	H	TPHSKDHSSPFYSPSHNGLLADHHESLDNDV	DHSSPFYSPSH(1)NGLLADHHESLDNDVAR	7.50864e+06	0	0	1.02741e+07	0	0	0	0	0	2.63587e+07	0	0	2.85175e+07	0	0	0	0	0	0	0	0	0	0	0	0	0	0	2.44891e+07	0	0	2.41895e+07	0	0	1.8553e+07	0	0
O54931	42	0.491284	1.02798	53.998	H	SPFYSPSHNGLLADHHESLDNDVAREIQYLD	DH(0.001)SSPFYSPSH(0.1)NGLLADH(0.388)H(0.491)ESLDNDVAR(0.02)	0	0	0	0	0	0	0	0	0	0	0	0	0	0	0	0	0	0	0	0	0	0	0	0	0	0	0	0	0	0	0	0	0	0	0	0
O55047	173	1	84.1883	84.188	H	NTEHSCSSQKQISIQHRQTQSDLTIEKISAL	QISIQH(1)R(1)QTQSDLTIEK(1)	0	0	0	0	0	0	0	0	0	0	0	0	0	0	0	0	0	0	0	0	0	0	0	0	0	0	0	0	0	0	0	0	0	0	0	0
O55131	84	0.857899	7.80839	139.21	H	LFLTDLYSPEYPGPSHRIKKTVQVEQSKVLI	STLINSLFLTDLYSPEYPGPSH(0.858)R(0.142)	1.66946e+08	0	0	1.97562e+08	0	0	1.29424e+08	0	0	1.41341e+08	0	0	4.47219e+07	0	0	9.15134e+07	0	0	2.50618e+08	0	0	3.50356e+08	0	0	3.19009e+08	0	0	6.74501e+07	0	0	207128576	0	0	1.305e+08	0	0
O88448	188	0.994601	22.6534	51.07	H	QSPAPSPGGGDVAAQHGGYEIPARLRTLHNL	DSLDDLFPNEDEQSPAPSPGGGDVAAQH(0.995)GGYEIPAR(0.005)	0	0	0	0	0	0	0	0	0	0	0	0	7.64404e+06	0	0	0	0	0	0	0	0	0	0	0	0	0	0	0	0	0	0	0	0	0	0	0
O88703	801	0.99997	45.1959	121.72	H	SRASRPLSASQPSLPHGVPAPSPAASARPAS	ASRPLSASQPSLPH(1)GVPAPSPAASAR	6.38785e+07	0	0	3.74482e+07	0	0	0	0	0	1.3163e+08	0	0	5.57522e+07	0	0	9.47761e+07	0	0	4.44624e+07	0	0	3.32699e+07	0	0	0	0	0	6.61497e+07	0	0	1.53252e+08	0	0	5.6837e+07	0	0
O88737	778	0.923095	13.8037	87.739	H	PRSSSSAVEDQKRRPHSLSITPEAFDSDEEL	R(0.038)R(0.038)PH(0.923)SLSITPEAFDSDEELGDILEEDDSLAWGR	3.09992e+08	0	0	3.00101e+08	0	0	3.80053e+08	0	0	1.92384e+08	0	0	247378845	0	0	2.18018e+08	0	0	385647886	0	0	5.93018e+08	0	0	5.77488e+08	0	0	2.34388e+08	0	0	2.17451e+08	0	0	2.56557e+08	0	0
O88737	2813	0.890118	9.08522	212.1	H	KSPQVLYSPVSPLSPHRLLDTSFASSERLNK	SPQVLYSPVSPLSPH(0.89)R(0.11)	4.94272e+06	0	0	0	0	0	0	0	0	0	0	0	0	0	0	3.25564e+06	0	0	0	0	0	0	0	0	0	0	0	8.57827e+06	0	0	1.82886e+07	0	0	5.04509e+06	0	0
O88737	248	0.988723	19.8089	76.818	H	SKSQQQLHSPALSPAHSPAKQPLGKPEQERS	SQQQLHSPALSPAH(0.989)SPAK(0.01)QPLGKPEQER	0	0	0	1.31008e+07	0	0	9.47765e+06	0	0	0	0	0	0	0	0	0	0	0	0	0	0	0	0	0	0	0	0	0	0	0	0	0	0	0	0	0
O88737	2915	1	67.495	70.67	H	RKVKRTLPSPPPEEAHLPLAGQVPSQLYAAS	TLPSPPPEEAH(1)LPLAGQVPSQLYAASLLQR	0	0	0	3.94867e+07	0	0	2.43459e+07	0	0	1.13042e+07	0	0	1.50041e+07	0	0	9.84046e+06	0	0	5.57414e+07	0	0	1.34828e+07	0	0	0	0	0	0	0	0	0	0	0	0	0	0
O88737	2052	0.542826	0.751543	52.707	H	YLGQGLQYGSFTDLRHPTDLLSHPLPLRRYS	YLGQGLQYGSFTDLR(0.457)H(0.543)PTDLLSH(0.001)PLPLR	1.04295e+07	0	0	1.79729e+07	0	0	2.41819e+07	0	0	1.38353e+07	0	0	0	0	0	0	0	0	4.62366e+07	0	0	8.35172e+07	0	0	3.81376e+07	0	0	0	0	0	0	0	0	0	0	0
O88935	433	1	110.825	162.88	H	LPRQPQRDASPGRGSHSQSSSPGALTLGRQT	GSH(1)SQSSSPGALTLGR	5.12236e+07	0	0	1.11525e+08	0	0	9.0439e+07	0	0	3.94196e+07	0	0	5.98248e+07	0	0	7.11445e+07	0	0	4.46945e+07	0	0	6.37329e+07	0	0	6.17628e+07	0	0	5.90692e+07	0	0	5.75642e+07	0	0	7.11515e+07	0	0
O89026	1394	0.920122	11.5249	88.976	H	VARRQMQDAAGRRHFHASQCPRPTSPVSTDS	H(0.012)FH(0.92)ASQCPR(0.065)PTSPVSTDSNMSAVVIQK(0.003)	1.53854e+07	0	0	0	0	0	1.84068e+07	0	0	0	0	0	0	0	0	3.81795e+07	0	0	2.70634e+07	0	0	1.91391e+07	0	0	0	0	0	2.84463e+07	0	0	3.12305e+07	0	0	0	0	0
P04370	208	0.710064	5.07053	104.9	H	HTRTTHYGSLPQKSQHGRTQDENPVVHFFKN	TTHYGSLPQK(0.069)SQH(0.71)GR(0.221)	0	0	0	0	0	0	0	0	0	0	0	0	2.02109e+07	0	0	0	0	0	0	0	0	0	0	0	9.13646e+06	0	0	7.11388e+06	0	0	0	0	0	0	0	0
P05480	25	0.999995	53.1047	84.683	H	DASQRRRSLEPSENVHGAGGAFPASQTPSKP	SLEPSENVH(1)GAGGAFPASQTPSKPASADGHR	3.22489e+08	0	0	4.0793e+08	0	0	3.80999e+08	0	0	2.37237e+08	0	0	3.72231e+08	0	0	4.01581e+08	0	0	3.2603e+08	0	0	3.3644e+08	0	0	3.53107e+08	0	0	2.06279e+08	0	0	2.75521e+08	0	0	2.98703e+08	0	0
P06803	11	0.996795	25.3433	67.207	H	_____MLLSKINSLAHLRAAPCNDLHATKLA	MLLSK(0.007)INSLAH(0.997)LR(0.996)AAPCNDLH(0.418)ATK(0.583)	0	1698803373	225688277	0	2.15301e+08	0	0	3.78659e+08	4.80791e+08	0	4.13883e+08	4.88194e+08	0	3.44153e+07	1.59743e+07	0	6.09226e+07	5.90919e+08	0	4.60919e+08	0	0	3.36434e+08	0	0	350251868	1125308158	0	3.51411e+08	0	0	1347069344	8.5768e+08	0	1.26623e+08	0
P0DW27	20	0.439417	0	70.145	H	VVVVTGLAAMEPLIVHRMIVERTAAGTMIIE	K(1)DEVVVVTGLAAMEPLIVH(0.439)R(0.439)MIVER(0.121)	0	0	0	0	0	0	0	0	0	0	0	0	0	0	0	0	0	0	0	0	0	0	0	0	0	0	0	0	0	0	0	0	0	0	0	0
P10636-7	359	0.971462	15.32	115.12	H	THKLTFRENAKAKTDHGAEIVYKSPVVSGDT	TDH(0.971)GAEIVYK(1)SPVVSGDTSPR(0.029)	0	0	0	0	9.42293e+07	0	0	0	0	0	2.83249e+07	0	0	0	0	0	0	0	0	0	0	0	0	0	0	0	0	0	0	0	0	0	0	0	0	0
P10636-7	378	1	49.1913	117.49	H	IVYKSPVVSGDTSPRHLSNVSSTGSIDMVDS	H(1)LSNVSSTGSIDMVDSPQLATLADEVSASLAK(1)	8.12935e+07	1.75956e+08	0	5.90452e+07	2.18305e+08	0	6.06877e+07	1.53392e+08	0	6.79419e+07	2.2866e+08	0	1.06991e+08	2.17539e+08	0	6.67576e+07	2.37935e+08	0	1.33663e+07	5.19175e+07	0	2.04905e+07	2.9029e+07	0	1.73251e+07	8.78577e+07	0	7.19413e+06	4.16258e+07	0	1.50533e+07	8.09642e+07	0	2.94772e+07	1.22188e+08	0
P11798	76	0.946457	13.7134	91.202	H	ARICRLLKHPNIVRLHDSISEEGHHYLIFDL	LH(0.946)DSISEEGH(0.04)H(0.013)YLIFDLVTGGELFEDIVAR	1.22646e+06	0	0	0	8.74448e+06	0	1.73269e+06	9.24811e+06	0	0	0	0	1.27496e+06	0	0	1.39283e+06	0	0	0	0	0	3.26932e+06	0	0	0	0	0	0	0	0	0	0	0	0	0	0
P11798	84	0.998792	29.1703	155.61	H	HPNIVRLHDSISEEGHHYLIFDLVTGGELFE	LH(0.002)DSISEEGH(0.999)H(0.999)YLIFDLVTGGELFEDIVAR	2.04604e+06	2.13011e+07	0	1.02033e+08	2.46727e+07	0	4.79629e+07	2.10234e+07	0	4.99038e+07	1.51146e+07	0	9.10301e+06	1.19467e+07	0	1.19447e+07	1.17428e+07	0	7.46695e+07	1.11695e+08	0	1.76128e+08	6.64266e+07	0	3.77946e+07	2.7987e+07	0	3.85642e+07	4.53606e+06	0	0	1.57408e+07	0	1.46805e+07	2.21315e+07	0
P11798	85	0.998792	29.1703	155.61	H	PNIVRLHDSISEEGHHYLIFDLVTGGELFED	LH(0.002)DSISEEGH(0.999)H(0.999)YLIFDLVTGGELFEDIVAR	3.69142e+07	2.13011e+07	0	7.21756e+07	2.46727e+07	0	91392988	2.10234e+07	0	6.89284e+07	1.51146e+07	0	2.41708e+07	1.19467e+07	0	2.7369e+07	1.17428e+07	0	7.44653e+07	1.11695e+08	0	2.66454e+08	6.64266e+07	0	3.77946e+07	2.7987e+07	0	4.01515e+07	4.53606e+06	0	4.31595e+07	1.57408e+07	0	3.46181e+07	2.21315e+07	0
P12849	8	0.998218	27.8337	89.917	H	________MASPSCFHSEDEDSLKGCEMYVQ	ASPSCFH(0.998)SEDEDSLK(0.002)GCEMYVQK	1.3942e+07	0	0	1.79138e+07	0	0	1.05508e+07	0	0	1.27595e+07	0	0	1.37826e+07	0	0	0	0	0	0	0	0	0	0	0	0	0	0	0	0	0	0	0	0	1.22923e+07	0	0
P12960	25	0.999999	63.9303	68.552	H	LLLISLTSCLGDFTWHRRYGHGVSEEDKGFG	MKMPLLVSHLLLISLTSCLGDFTWH(1)R(1)	0	3.92787e+07	0	0	4.5049e+07	0	0	4.76901e+07	0	0	5.14656e+07	0	0	4.074e+07	0	0	4.30141e+07	0	0	7.26895e+07	0	0	9.49938e+07	0	0	8.95045e+07	0	0	2.89832e+07	0	0	5.56836e+07	0	0	7.18263e+07	0
P14152	187	0.991995	20.9318	108.97	H	GVTADDVKNVIIWGNHSSTQYPDVNHAKVKL	NVIIWGNH(0.992)SSTQYPDVNHAK(0.008)	2.20104e+07	0	0	2.28707e+07	0	0	2.38808e+07	0	0	3.66506e+07	0	0	2.79797e+07	0	0	2.71281e+07	0	0	0	0	0	2.95728e+07	0	0	3.08156e+07	0	0	0	0	0	2.16744e+07	0	0	2.96281e+07	0	0
P14873	30	0.752651	4.83285	56.452	H	GSIGNPAASTSPSLSHRFLDSKFYLLVVVGE	ATVVVEATEPEPSGSIGNPAASTSPSLSH(0.753)R(0.247)	0	0	0	0	0	0	0	0	0	0	0	0	7.04031e+06	0	0	0	0	0	0	0	0	0	0	0	0	0	0	0	0	0	0	0	0	0	0	0
P14873	1810	1	83.7027	186.08	H	GFSDSTSAAKETAAAHQASSSPPIDAATAEP	ETAAAH(1)QASSSPPIDAATAEPYGFR	2.57076e+07	0	0	3.99722e+07	0	0	3.25886e+07	0	0	3.71254e+07	0	0	4.12157e+07	0	0	4.28872e+07	0	0	1.09278e+08	0	0	4.3574e+07	0	0	5.3679e+07	0	0	5.36811e+07	0	0	7.30823e+07	0	0	7.32588e+07	0	0
P14873	1665	0.999223	31.1604	66.173	H	PEHSLAMDFSRQSPDHPTLGASVLHITENGP	QSPDH(0.999)PTLGASVLH(0.998)ITENGPTEVDYSPSDIQDSSLSHK(0.003)	0	1.56027e+08	0	0	1.75862e+08	0	2.03184e+08	1.56493e+08	0	1.83738e+07	2.17464e+08	0	0	2.66048e+08	0	2.67684e+08	2.90968e+08	0	253760655	174450167	0	2.46296e+08	1.40821e+08	0	0	1.76017e+08	0	0	1.98843e+08	0	0	2.28064e+08	0	2.37938e+08	2.43169e+08	0
P14873	1674	0.998906	30.377	74.063	H	SRQSPDHPTLGASVLHITENGPTEVDYSPSD	QSPDHPTLGASVLH(0.999)ITENGPTEVDYSPSDIQDSSLSHK(0.001)	4.27185e+07	1.56027e+08	0	8.61843e+06	1.75862e+08	0	3.30425e+07	1.56493e+08	0	8.8366e+06	2.17464e+08	0	4.59867e+07	2.66048e+08	0	8.26675e+06	2.90968e+08	0	3.36719e+07	174450167	0	4.0406e+07	1.40821e+08	0	7.93154e+06	1.76017e+08	0	4.5073e+07	1.98843e+08	0	0	2.28064e+08	0	0	2.43169e+08	0
P14873	1652	1	84.4471	160.8	H	EQSSMSIEFGQESPEHSLAMDFSRQSPDHPT	SEQSSMSIEFGQESPEH(1)SLAMDFSR	1.86266e+08	0	0	1.76936e+08	0	0	1.46133e+08	0	0	1.43934e+08	0	0	2.02672e+08	0	0	2.63547e+08	0	0	389477529	0	0	2.72379e+08	0	0	318795844	0	0	4.07445e+08	0	0	3.95534e+08	0	0	2.06007e+08	0	0
P14873	1304	0.987075	18.8291	101.38	H	ARSVSPGVTQAVVEEHCASPEEKTLEVVSPS	SVSPGVTQAVVEEH(0.987)CASPEEK(0.013)	5.93308e+07	0	0	1.09829e+08	0	0	1.07148e+08	0	0	3.39418e+07	0	0	2.79145e+07	0	0	138693574	0	0	1.44709e+07	0	0	4.92116e+07	0	0	7.97301e+06	0	0	3.4034e+07	0	0	0	0	0	2.5015e+07	0	0
P14873	1328	1	69.1419	85.619	H	LEVVSPSQSVTGSAGHTPYYQSPTDEKSSHL	TLEVVSPSQSVTGSAGH(1)TPYYQSPTDEK(1)	1.33406e+08	1.51155e+08	0	7.24603e+07	1.72625e+08	0	1.01477e+07	1.40007e+08	0	1.61423e+08	2.39675e+08	0	0	2.73906e+08	0	7.10456e+07	3.34048e+08	0	1.53662e+08	1.79902e+08	0	1.07834e+07	1.31354e+08	0	0	1.81408e+08	0	5.0366e+07	1.77708e+08	0	3.96978e+07	209772517	0	1.13188e+08	2.04552e+08	0
P15105	8	0.689734	3.46975	85.862	H	________MATSASSHLNKGIKQMYMSLPQG	ATSASSH(0.69)LNK(0.31)GIK	0	0	0	8.73592e+07	0	0	1.95023e+07	0	0	342491340	0	0	1.19875e+08	0	0	1.67953e+08	0	0	1.22316e+08	0	0	1.77074e+08	0	0	0	0	0	1.92239e+08	0	0	0	0	0	1.79633e+07	0	0
P15388	43	0.860356	7.90472	80.245	H	TLPGTRLAWLAEPDAHSHFDYDPRADEFFFD	LAWLAEPDAH(0.86)SH(0.139)FDYDPR	4.98742e+06	0	0	0	0	0	0	0	0	8.01279e+06	0	0	8.58405e+06	0	0	0	0	0	0	0	0	0	0	0	0	0	0	0	0	0	9.70662e+06	0	0	9.39338e+06	0	0
P15388	45	0.594713	1.69997	73.802	H	PGTRLAWLAEPDAHSHFDYDPRADEFFFDRH	LAWLAEPDAH(0.402)SH(0.595)FDYDPR(0.003)	0	0	0	0	0	0	0	0	0	0	0	0	0	0	0	0	0	0	0	0	0	0	0	0	0	0	0	0	0	0	0	0	0	4.52009e+07	0	0
P15388	480	1	71.4381	94.087	H	QLGSPNYCKSVVNSPHHSTQSDTCPLAQEEI	SVVNSPH(1)H(1)STQSDTCPLAQEEILEINR	0	6.25132e+06	0	0	6.01065e+06	0	0	7558572	0	0	0	0	6.43298e+06	1.43375e+07	0	1.22685e+07	1.10024e+07	0	0	0	0	5.6019e+06	0	0	0	0	0	1.12272e+07	0	0	1.14784e+07	0	0	0	1.07701e+07	0
P15388	481	1	72.3336	94.087	H	LGSPNYCKSVVNSPHHSTQSDTCPLAQEEIL	SVVNSPH(1)H(1)STQSDTCPLAQEEILEINR	0	6.25132e+06	0	0	6.01065e+06	0	0	7558572	0	1.1032e+07	0	0	6.43298e+06	1.43375e+07	0	1.22685e+07	1.10024e+07	0	0	0	0	5.6019e+06	0	0	0	0	0	1.12272e+07	0	0	1.14784e+07	0	0	1.93316e+07	1.07701e+07	0
P16014	128	0.883481	8.7983	123.55	H	GQTKVGNEKWTEGGGHSREGVDDQESLRPSN	WTEGGGH(0.883)SR(0.117)EGVDDQESLRPSNQQASK	5.56024e+07	0	0	3.3919e+07	0	0	2.5712e+07	0	0	4.09212e+07	0	0	3.4776e+07	0	0	4.37486e+07	0	0	1.78722e+07	0	0	2.05912e+07	0	0	1.30682e+07	0	0	1.17485e+07	0	0	1.85046e+07	0	0	3.80131e+07	0	0
P18872	322	0.571291	2.417	91.555	H	QFESKNRSPNKEIYCHMTCATDTNNIQVVFD	NR(0.327)SPNK(0.101)EIYCH(0.571)MTCATDTNNIQVVFDAVTDIIIANNLR	1.92141e+07	0	0	0	0	0	0	0	0	1.38843e+07	0	0	1.49021e+07	0	0	1.22665e+07	0	0	0	0	0	0	0	0	0	0	0	0	0	0	0	0	0	0	0	0
P20357	25	0.989451	20.8174	173.06	H	KAPHWTSASLTEAAAHPHSPEMKDQGGAGEG	APH(0.008)WTSASLTEAAAH(0.989)PH(0.001)SPEMK(0.001)DQGGAGEGLSR	2.64308e+07	0	0	6.91879e+08	0	0	3.02089e+07	0	0	3.89594e+08	0	0	1.83668e+07	0	0	0	0	0	0	0	0	1.57691e+07	0	0	2.06851e+07	0	0	0	0	0	5.69296e+07	0	0	6.77139e+08	0	0
P20357	27	0.993804	23.7686	185.32	H	PHWTSASLTEAAAHPHSPEMKDQGGAGEGLS	APHWTSASLTEAAAH(0.004)PH(0.994)SPEMK(0.002)	1609815139	0	0	1950565173	0	0	2069775799	0	0	1120802695	0	0	1451780984	0	0	6.85184e+07	0	0	1778486205	0	0	2235518375	0	0	2194931452	0	0	1677445819	0	0	1361220015	0	0	1670037317	0	0
P20357	645	0.999991	50.6644	79.877	H	QEAGYSTLAQSYTPDHPSELPEEPSSPQERM	ASQPSPPAQEAGYSTLAQSYTPDH(1)PSELPEEPSSPQER	4.1109e+08	0	0	4.78102e+08	0	0	3.89562e+08	0	0	3.69743e+08	0	0	4.22985e+08	0	0	4.11654e+08	0	0	6.21821e+07	0	0	3.08359e+07	0	0	473499058	0	0	3.95265e+08	0	0	4.84802e+08	0	0	4.36477e+08	0	0
P20444	107	0.487552	0	78.758	H	GPDTDDPRSKHKFKIHTYGSPTFCDHCGSLL	FK(0.488)IH(0.488)TYGSPTFCDH(0.025)CGSLLYGLIHQGMK	0	0	0	0	0	0	0	0	0	0	0	0	0	0	0	0	0	0	0	0	0	0	0	0	0	0	0	0	0	0	0	0	0	0	0	0
P20917	555	1	79.7708	145.49	H	KNVTESSSFSGGDNPHVLYSPEFRISGAPDK	NVTESSSFSGGDNPH(1)VLYSPEFR	1.70628e+07	0	0	2.02495e+07	0	0	9.46796e+06	0	0	4.697e+07	0	0	5.06997e+07	0	0	3.96624e+07	0	0	1.26106e+07	0	0	1.37975e+07	0	0	1.41943e+07	0	0	3.19396e+07	0	0	5.60925e+07	0	0	5.98342e+07	0	0
P22389	17	1	44.8286	81.854	H	VSAWCSIALALLLALHEGKGQAAATLEQPAS	VSAWCSIALALLLALH(1)EGK(1)	0	0	0	0	0	0	0	0	0	0	0	0	0	0	0	0	0	0	0	0	0	0	0	0	0	0	0	0	0	0	0	0	0	0	0	0
P23298	471	0.999855	38.4007	99.568	H	ARFYAAEIISALMFLHEKGIIYRDLKLDNVL	FYAAEIISALMFLH(1)EK	0	0	0	0	0	0	0	0	0	0	0	0	0	0	0	0	0	0	0	0	0	0	0	0	0	0	0	0	0	0	0	0	0	0	0	0
P24529	474	0.92059	10.6419	77.795	H	KFDPYTLAIDVLDSPHTIRRSLEGVQDELHT	FDPYTLAIDVLDSPH(0.921)TIR(0.079)	5.23564e+06	0	0	8.3539e+06	0	0	2.2549e+06	0	0	0	0	0	3.45728e+06	0	0	4.54824e+06	0	0	1.05925e+07	0	0	0	0	0	0	0	0	4.54679e+06	0	0	1.51829e+07	0	0	6.6591e+06	0	0
P26339	307	0.99487	22.8765	70.983	H	EASEALPSEGKGELEHSQQEEDGEEAMVGTP	GELEH(0.995)SQQEEDGEEAMVGTPQGLFPQGGK(0.005)	0	0	0	7.71878e+06	0	0	3.86812e+06	0	0	3.88572e+06	0	0	0	0	0	7.88892e+06	0	0	0	0	0	0	0	0	0	0	0	0	0	0	0	0	0	0	0	0
P26339	117	0.999666	34.767	124.8	H	KQQQQQQQQQQQEQQHSSFEDELSEVFENQS	QQQQQQQQQQQEQQH(1)SSFEDELSEVFENQSPDAK	0	0	0	0	0	0	0	0	0	2.94127e+07	0	0	2.89393e+07	0	0	4.58621e+07	0	0	0	0	0	0	0	0	0	0	0	4.62178e+07	0	0	0	0	0	0	0	0
P28028	593	0.973875	15.7145	106.43	H	GDFGLATVKSRWSGSHQFEQLSGSILWMAPE	SR(0.026)WSGSH(0.974)QFEQLSGSILWMAPEVIR	0	0	0	3.2373e+07	0	0	3.16585e+07	0	0	2.76577e+07	0	0	9.3021e+06	0	0	1.89348e+07	0	0	5.88517e+07	0	0	0	0	0	5.05571e+07	0	0	2.137e+07	0	0	0	0	0	3.35439e+07	0	0
P28028	353	1	92.8318	97.223	H	NQFGQRDRSSSAPNVHINTIEPVNIDDLIRD	SSSAPNVH(1)INTIEPVNIDDLIR	1.33814e+07	0	0	1.47238e+07	0	0	7.55186e+06	0	0	6.88254e+06	0	0	7.93486e+06	0	0	7.06219e+06	0	0	0	0	0	0	0	0	1.61054e+07	0	0	0	0	0	0	0	0	9.86854e+06	0	0
P28652	385	0.999931	41.6315	64.856	H	GSLPPAALEPQTTVIHNPVDGIKESSDSTNT	GSLPPAALEPQTTVIH(1)NPVDGIK(0.998)ESSDSTNTTIEDEDAK(0.002)	0	0	0	0	1.22037e+07	0	0	2.12224e+07	0	0	0	0	0	0	0	0	0	0	0	0	0	0	1.59847e+07	0	0	5.74188e+07	0	0	0	0	0	0	0	0	0	0
P28738	929	0.994589	22.6781	172.33	H	RRAHSAQIAKPIRPGHYPASSPTAVHAVRGG	PIR(0.005)PGH(0.995)YPASSPTAVHAVR	1.45585e+07	0	0	5.45365e+07	0	0	0	0	0	3.74637e+07	0	0	3.57919e+07	0	0	2.40553e+07	0	0	0	0	0	4.40477e+07	0	0	2.53953e+07	0	0	3.79598e+07	0	0	0	0	0	5.02033e+07	0	0
P28738	939	0.991295	22.5979	187.78	H	PIRPGHYPASSPTAVHAVRGGGGGSSNSTHY	PIRPGH(0.003)YPASSPTAVH(0.991)AVR(0.005)	2.52482e+08	0	0	3.61917e+08	0	0	2.60637e+08	0	0	3.3139e+08	0	0	269965006	0	0	3.93327e+07	0	0	214766379	0	0	4.83497e+07	0	0	1.3423e+07	0	0	1.11441e+08	0	0	201490651	0	0	0	0	0
P33175	926	0.999979	46.8294	226.42	H	KRGHSAQIAKPVRPGHYPASSPTNPYGTRSP	PVRPGH(1)YPASSPTNPYGTR	0	0	0	1.97982e+06	0	0	0	0	0	3.1196e+06	0	0	0	0	0	2.38854e+06	0	0	0	0	0	0	0	0	0	0	0	3.01976e+06	0	0	0	0	0	0	0	0
P35486	290	0.96487	14.3879	131.12	H	SGKGPILMELQTYRYHGHSMSDPGVSYRTRE	YH(0.965)GH(0.035)SMSDPGVSYR	0	0	0	0	0	0	0	0	0	0	0	0	7.53903e+07	0	0	0	0	0	0	0	0	0	0	0	1.55781e+07	0	0	1.96613e+07	0	0	0	0	0	0	0	0
P35486	292	0.999904	40.177	139.15	H	KGPILMELQTYRYHGHSMSDPGVSYRTREEI	YHGH(1)SMSDPGVSYR	1.26369e+08	0	0	1.08265e+08	0	0	1.70869e+08	0	0	117017159	0	0	228970471	0	0	1.45219e+08	0	0	106129336	0	0	1.35111e+08	0	0	5.29913e+07	0	0	5.87916e+07	0	0	7.41637e+07	0	0	5.40115e+08	0	0
P39447	118	0.999598	35.736	65.118	H	KITIRRKKKVQIPVSHPDPEPVSDNEDDSYD	VQIPVSH(1)PDPEPVSDNEDDSYDEEVHDPR	1.47938e+07	0	0	1.39621e+07	0	0	1.08832e+07	0	0	8.20339e+06	0	0	2.29272e+07	0	0	2.22046e+07	0	0	0	0	0	0	0	0	0	0	0	0	0	0	2.12148e+07	0	0	1.93687e+07	0	0
P39447	137	0.999803	37.0516	70.027	H	EPVSDNEDDSYDEEVHDPRAGRGALANRRSE	VQIPVSH(0.003)PDPEPVSDNEDDSYDEEVH(1)DPR(0.998)	0	0	0	0	2.05521e+07	0	0	1.29551e+07	0	0	1.48905e+07	0	0	2.91645e+07	0	0	2.51225e+07	0	0	9.61042e+06	0	0	0	0	0	0	0	0	1.4749e+07	0	0	0	0	0	1.26205e+07	0
P39447	1373	0.752752	7.47569	79.068	H	LSYFDRRSFESKPSAHLPAGHHSEPAKPVHS	SFESK(0.135)PSAH(0.753)LPAGH(0.053)H(0.045)SEPAK(0.003)PVH(0.011)SQSQPNFSSYSSK(0.001)	0	0	0	0	0	0	0	0	0	0	0	0	5.32611e+06	0	0	4.57782e+06	0	0	0	0	0	0	0	0	8.33733e+06	0	0	3.4416e+06	0	0	7.31538e+06	0	0	6.03017e+06	0	0
P39447	1378	0.436105	1.16509	74.28	H	RRSFESKPSAHLPAGHHSEPAKPVHSQSQPN	SFESK(0.333)PSAH(0.128)LPAGH(0.436)H(0.099)SEPAK(0.001)PVH(0.001)SQSQPNFSSYSSK	0	0	0	0	0	0	0	0	0	0	0	0	0	0	0	0	0	0	0	0	0	0	0	0	0	0	0	0	0	0	0	0	0	0	0	0
P40124	28	0.956932	13.7043	127.56	H	RAVGRLEAVSHTSDMHCGYGDSPSKGAVPYV	LEAVSH(0.002)TSDMH(0.957)CGYGDSPSK(0.041)	0	0	0	0	0	0	0	0	0	0	0	0	0	0	0	0	0	0	0	0	0	5.40422e+07	0	0	0	0	0	0	0	0	0	0	0	0	0	0
P41164	352	0.994983	20.1597	42.536	H	LWQFLVALLDDPSNSHFIAWTGRGMEFKLIE	RGSLQLWQFLVALLDDPSNSH(0.995)FIAWTGR(0.502)GMEFK(0.502)	0	1.67085e+07	0	0	2.44758e+07	0	0	2.42147e+07	0	0	3.03571e+07	0	0	3.12591e+07	0	0	5.15252e+07	0	0	7.67517e+07	0	0	5.0773e+07	0	0	6.26751e+06	0	0	0	0	0	5.79343e+07	0	0	5.39419e+07	0
P43006	540	0.992259	21.7456	157.35	H	KNHRESNSNQCVYAAHNSVVIDECKVTLAAN	NHR(0.001)ESNSNQCVYAAH(0.992)NSVVIDECK(0.007)	3.27762e+07	0	0	0	0	0	0	0	0	4.01348e+06	0	0	2.71662e+07	0	0	2.49387e+07	0	0	0	0	0	0	0	0	0	0	0	0	0	0	0	0	0	3.03478e+07	0	0
P43006	527	0.813865	6.95161	126.18	H	DIEMTKTQSIYDDKNHRESNSNQCVYAAHNS	TQSIYDDK(0.022)NH(0.814)R(0.164)ESNSNQCVYAAHNSVVIDECK	0	0	0	2.83536e+07	0	0	7.69943e+06	0	0	0	0	0	0	0	0	8.39336e+07	0	0	0	0	0	0	0	0	0	0	0	1.11356e+08	0	0	7.67562e+06	0	0	0	0	0
P46938	111	1	128.527	132.22	H	DAGTAGALTPQHVRAHSSPASLQLGAVSPGT	AH(1)SSPASLQLGAVSPGTLTASGVVSGPAAAPAAQHLR	1.32188e+07	0	0	1.51735e+07	0	0	1.54831e+07	0	0	0	0	0	1.71346e+07	0	0	1.17149e+07	0	0	17997620	0	0	6.24143e+06	0	0	32862363	0	0	0	0	0	3.31237e+07	0	0	7.75739e+06	0	0
P47708	677	1	101.043	120.31	H	KDKKIERWHQLQNENHVSSD___________	WHQLQNENH(1)VSSD	1.7743e+08	0	0	1.83845e+08	0	0	1.80416e+08	0	0	1.58169e+08	0	0	1.93525e+08	0	0	2.81944e+08	0	0	9.74829e+07	0	0	5.73777e+07	0	0	5.14641e+07	0	0	2.58733e+07	0	0	0	0	0	0	0	0
P47809	92	0.981964	17.3597	130.52	H	HSIESSGKLKISPEQHWDFTAEDLKDLGEIG	LK(0.018)ISPEQH(0.982)WDFTAEDLKDLGEIGR	3.8121e+08	0	0	3.20836e+07	0	0	0	0	0	1.50485e+07	0	0	2.92257e+07	0	0	1.03638e+08	0	0	1.19717e+08	0	0	0	0	0	0	0	0	4.47996e+08	0	0	2.2189e+08	0	0	5.36532e+08	0	0
P49025	1351	1	85.401	91.307	H	ARQQIAMSAIVRSPEHQPSAMSLLAPPSSRR	SPEH(1)QPSAMSLLAPPSSR	0	0	0	0	0	0	0	0	0	7.78294e+06	0	0	0	0	0	7.60691e+06	0	0	0	0	0	0	0	0	0	0	0	1.37342e+07	0	0	9.31859e+06	0	0	0	0	0
P50136	333	0.846607	7.03123	65.801	H	NQPFLIEAMTYRIGHHSTSDDSSAYRSVDEV	IGH(0.23)H(0.847)STSDDSSAYR(0.919)SVDEVNYWDK(0.005)QDHPISR	0	3.55572e+07	0	0	2.51504e+07	0	0	0	0	0	3.36893e+07	0	0	3.73814e+07	0	0	2.27282e+07	0	0	2.55168e+07	0	0	2.04447e+07	0	0	0	0	0	4.83263e+07	0	0	2.23484e+07	0	0	0	0
P51830	6	0.807914	7.92876	51.22	H	__________MASSPHQQLLHHHSTEVSCDS	ASSPH(0.808)QQLLH(0.13)H(0.031)H(0.031)STEVSCDSSGDSNSVR	0	0	0	0	0	0	0	0	0	0	0	0	0	0	0	0	0	0	0	0	0	0	0	0	0	0	0	1.59911e+07	0	0	2.22337e+07	0	0	0	0	0
P52480	5	0.743937	4.64141	73.603	H	___________MPKPHSEAGTAFIQTQQLHA	PK(0.256)PH(0.744)SEAGTAFIQTQQLH(0.001)AAMADTFLEHMCR	0	0	0	1.35365e+07	0	0	2.66443e+07	0	0	1.93157e+07	0	0	1.75687e+07	0	0	1.07335e+07	0	0	0	0	0	0	0	0	0	0	0	1.12308e+07	0	0	0	0	0	0	0	0
P52800	262	0.94721	13.1371	173.06	H	TLVVLLLKYRRRHRKHSPQHTTTLSLSTLAT	K(0.046)H(0.947)SPQH(0.002)TTTLSLSTLATPK(0.005)	115290277	0	0	0	0	0	113087923	0	0	0	0	0	0	0	0	8.41145e+07	0	0	0	0	0	7.80335e+07	0	0	0	0	0	0	0	0	0	0	0	0	0	0
P52800	266	0.986173	19.6145	139.12	H	LLLKYRRRHRKHSPQHTTTLSLSTLATPKRG	K(0.002)H(0.011)SPQH(0.986)TTTLSLSTLATPK(0.001)	0	0	0	0	0	0	0	0	0	0	0	0	0	0	0	7.20559e+07	0	0	0	0	0	0	0	0	0	0	0	0	0	0	0	0	0	0	0	0
P53668	256	0.682434	0.382759	48.13	H	LLIQETSRLLQLTLEHDPHDSLGHGPVSDPS	LLQLTLEH(0.682)DPH(0.654)DSLGH(0.653)GPVSDPSPLSSPVH(0.01)TPSGQAASSAR	0	0	0	0	0	0	0	0	0	0	2.1931e+07	0	0	0	0	0	6.35328e+06	0	0	0	0	0	0	0	0	0	0	0	0	0	0	0	0	0	0	0
P53668	259	0.858039	5.75783	58.436	H	QETSRLLQLTLEHDPHDSLGHGPVSDPSPLS	LLQLTLEH(0.471)DPH(0.858)DSLGH(0.668)GPVSDPSPLSSPVH(0.003)TPSGQAASSAR	0	0	0	0	0	0	0	0	0	2.03881e+07	0	0	0	3.66682e+07	0	1.19547e+07	2.68393e+07	0	0	0	0	0	0	0	0	0	0	2.3154e+07	1.26817e+07	0	2.56999e+07	0	0	0	2.83326e+07	0
P53668	264	0.85015	6.86322	56.313	H	LLQLTLEHDPHDSLGHGPVSDPSPLSSPVHT	LLQLTLEH(0.304)DPH(0.786)DSLGH(0.85)GPVSDPSPLSSPVH(0.059)TPSGQAASSAR(0.001)	0	0	0	0	0	0	0	0	0	0	0	0	0	3.66682e+07	0	0	2.68393e+07	0	0	0	0	0	0	0	0	0	0	0	1.26817e+07	0	0	0	0	0	2.83326e+07	0
P54254	225	0.929826	11.2222	50.593	H	NPGSPPPPTQQNQYIHISSSPQSSGRATSPP	AAGLVNPGSPPPPTQQNQYIH(0.93)ISSSPQSSGR(0.07)	0	0	0	0	0	0	1.29968e+07	0	0	0	0	0	0	0	0	5.96275e+06	0	0	0	0	0	0	0	0	0	0	0	0	0	0	0	0	0	0	0	0
P54987	15	0.506213	0	60.735	H	_MMLKSVTESFAGMIHGLKVNHLTDGIIRRS	MLKSVTESFAGMIH(0.506)GLK(0.506)VNH(0.993)LTDGIIR(0.995)	0	0	0	0	0	0	0	0	0	0	0	0	0	0	0	0	0	0	0	0	0	0	0	0	0	0	0	0	0	0	0	0	0	0	0	0
P54987	21	0.992773	18.3508	60.735	H	VTESFAGMIHGLKVNHLTDGIIRRSKRMILD	MLKSVTESFAGMIH(0.506)GLK(0.506)VNH(0.993)LTDGIIR(0.995)	0	0	0	0	0	0	0	0	0	0	0	0	0	0	0	0	0	0	0	0	0	0	0	0	0	0	0	0	0	0	0	0	0	0	0	0
P55937	594	0.999149	31.452	59.864	H	TLAQEARVRLQGEMAHIQVGQMTQAGLLEHL	LQGEMAH(0.999)IQVGQMTQAGLLEH(0.829)LK(0.172)	0	1.57937e+07	0	0	0	0	0	0	0	0	0	0	0	4.80462e+07	0	0	4.33778e+07	0	0	3.69461e+07	0	0	0	0	0	3.52574e+07	0	0	4.90777e+07	0	0	5.22599e+07	0	0	6.47383e+07	0
P55937	608	0.829243	6.89868	59.864	H	AHIQVGQMTQAGLLEHLKLENVSLSHQLTET	LQGEMAH(0.999)IQVGQMTQAGLLEH(0.829)LK(0.172)	0	1.57937e+07	0	0	0	0	0	0	0	0	0	0	0	4.80462e+07	0	0	4.33778e+07	0	0	3.69461e+07	0	0	0	0	0	3.52574e+07	0	0	4.90777e+07	0	0	5.22599e+07	0	0	6.47383e+07	0
P59114	18	0.999997	54.7587	155.54	H	NENHGSPREGASLLSHSPGTSSQSQPCSPKP	EGASLLSH(1)SPGTSSQSQPCSPKPVR	0	0	0	2.63867e+07	0	0	2.40396e+07	0	0	3.27775e+07	0	0	1.28263e+07	0	0	1.28271e+07	0	0	4.25079e+07	0	0	2.42357e+07	0	0	0	0	0	0	0	0	0	0	0	0	0	0
P59242	645	1	73.8411	73.841	H	KELQAEQQNQEVTGRHRNQVLEKQLAALREE	H(1)R(1)NQVLEK(1)QLAALR(1)	0	0	0	0	0	0	0	0	0	0	0	0	0	0	0	0	0	0	0	0	0	0	0	0	0	0	0	0	0	0	0	0	0	0	0	5.88088e+06
P59644	291	0.536318	1.16786	71.811	H	PRLSPSFRARPEAPRHSPEDPVLPPPPQTLP	AR(0.054)PEAPR(0.41)H(0.536)SPEDPVLPPPPQTLPLDVSPGLPESGTR	0	0	0	1.68136e+07	0	0	0	0	0	0	0	0	0	0	0	0	0	0	0	0	0	0	0	0	0	0	0	0	0	0	0	0	0	0	0	0
P60853	139	0.985817	20.3291	105.51	H	PTAFKPVLPRSGAILHSSPESTSHQLHPMPP	SGAILH(0.986)SSPESTSH(0.009)QLH(0.003)PMPPDK(0.001)PK(0.001)	4.09221e+07	0	0	5.81575e+07	0	0	0	0	0	1.69898e+07	0	0	2.34968e+07	0	0	1.50435e+07	0	0	7.52085e+07	0	0	5.88774e+07	0	0	5.2688e+07	0	0	0	0	0	4.01916e+06	0	0	2.25339e+07	0	0
P60853	147	0.950947	13.7107	105.51	H	PRSGAILHSSPESTSHQLHPMPPDKPKEQEL	SGAILH(0.04)SSPESTSH(0.951)QLH(0.008)PMPPDKPK	0	0	0	2.06649e+07	0	0	1.35394e+07	0	0	0	0	0	3.66544e+06	0	0	7.28933e+06	0	0	2.41165e+07	0	0	0	0	0	1.34325e+07	0	0	0	0	0	0	0	0	0	0	0
P60904	18	0.996422	28.7362	90.592	H	DQRQRSLSTSGESLYHVLGLDKNATSDDIKK	SLSTSGESLYH(0.996)VLGLDK(0.001)NATSDDIK(0.001)K(0.001)	2.36047e+07	0	0	1.48926e+07	0	0	1.87168e+07	0	0	3.30574e+07	0	0	2.87419e+07	0	0	2.32568e+07	0	0	4.54042e+07	0	0	4.52152e+07	0	0	3.11367e+07	0	0	8.64218e+07	0	0	3.98595e+07	0	0	6.35605e+07	0	0
P61264	22	0.995801	24.4512	112.39	H	ELRSAKDSDDEEEVVHVDRDHFMDEFFEQVE	SAK(0.999)DSDDEEEVVH(0.996)VDR(0.005)DH(0.001)FMDEFFEQVEEIR	1.09623e+08	1.82025e+07	0	2.10182e+08	1.28891e+07	0	4.48074e+07	0	0	1.37306e+08	1.56212e+07	0	1.60494e+08	1.46165e+07	0	4.76099e+07	2.83293e+07	0	4.576e+07	1.81094e+07	0	1340926205	0	0	2245817939	0	0	5.9587e+08	3.63058e+07	0	4.18242e+07	1.53565e+07	0	9.90569e+07	3.18599e+07	0
P61264	27	0.756107	8.36622	86.953	H	KDSDDEEEVVHVDRDHFMDEFFEQVEEIRGC	SAK(0.11)DSDDEEEVVH(0.078)VDR(0.056)DH(0.756)FMDEFFEQVEEIR	4.92722e+07	0	0	0	0	0	6.12302e+06	0	0	0	0	0	6.16713e+07	0	0	9.05251e+07	0	0	0	0	0	8.99516e+07	0	0	9.53574e+07	0	0	0	0	0	6.18474e+07	0	0	0	0	0
P62309	5	0.985294	18.7621	91.087	H	___________MSKAHPPELKKFMDKKLSLK	MSK(0.001)AH(0.985)PPELK(0.013)K(0.001)	0	0	0	0	0	0	0	0	0	0	0	0	4.87667e+06	0	0	3.7393e+06	0	0	0	0	0	0	0	0	2.16703e+06	0	0	0	0	0	0	0	0	5.65236e+06	0	0
P62484	293	1	122.531	145.9	H	GHPVQFYSMNRPASRHTPPTIGGSLPYRRPP	H(1)TPPTIGGSLPYR	0	0	0	3.00723e+07	0	0	1.07625e+07	0	0	7.10268e+06	0	0	5.46588e+06	0	0	7.99474e+06	0	0	2.99818e+07	0	0	2.18476e+07	0	0	1.54135e+07	0	0	0	0	0	0	0	0	0	0	0
P62484	443	1	69.0678	91.926	H	GVTGLFPGNYVESIMHYSE____________	KNDDGWYEGVMNGVTGLFPGNYVESIMH(1)YSE	6.41276e+07	0	0	6.85717e+07	0	0	6.76351e+07	0	0	4.18279e+07	0	0	4.12989e+07	0	0	4.66416e+07	0	0	6.86556e+07	0	0	8.33361e+07	0	0	8.80413e+07	0	0	2.54926e+07	0	0	6.77065e+07	0	0	4.58339e+07	0	0
P62897	27	0.496959	0	78.692	H	VQKCAQCHTVEKGGKHKTGPNLHGLFGRKTG	H(0.497)K(0.497)TGPNLH(0.006)GLFGR	0	0	0	0	0	0	0	0	0	0	0	0	0	0	0	0	0	0	0	0	0	0	0	0	0	0	0	0	0	0	0	0	0	0	0	0
P62996	200	0.999649	34.5436	101.53	H	DGRRIRVDFSITKRPHTPTPGIYMGRPTYGS	RPH(1)TPTPGIYMGR	1.03845e+07	0	0	7.46544e+06	0	0	2.71876e+07	0	0	4.17343e+07	0	0	4.45595e+07	0	0	8.94018e+06	0	0	3.28691e+06	0	0	0	0	0	0	0	0	1.64307e+08	0	0	3.47876e+07	0	0	8.41519e+07	0	0
P63115	10	0.998296	29.0447	121.3	H	______MRRDSDMASHIQQPGGHGNPGPAPS	RRDSDMASH(0.998)IQQPGGH(0.001)GNPGPAPSPSPGPGPGPGASER	1.39925e+07	0	0	1.41255e+07	0	0	2.8143e+07	0	0	5.69949e+07	0	0	4.34922e+07	0	0	3.81535e+07	0	0	0	0	0	0	0	0	0	0	0	2.36227e+07	0	0	0	0	0	4.21859e+07	1.92294e+07	0
P63115	17	0.994917	25.0646	113.7	H	RRDSDMASHIQQPGGHGNPGPAPSPSPGPGP	R(0.182)DSDMASH(0.82)IQQPGGH(0.995)GNPGPAPSPSPGPGPGPGASER(0.003)	1.12183e+08	0	0	1.52342e+08	0	0	1.09138e+08	0	0	3.45033e+08	0	0	2.74135e+08	0	0	3.11423e+08	0	0	1.026e+08	0	0	0	0	0	1.09154e+08	0	0	2.4323e+08	0	0	4.15136e+08	0	0	3.16866e+08	1.92294e+07	0
P63328	465	0.427802	0	60.347	H	EAIEADEAIKGFSPQHKITSFEEAKGLDRIN	QTLQSATVEAIEADEAIK(0.144)GFSPQH(0.428)K(0.428)	0	0	0	0	0	0	0	0	0	0	0	0	0	0	0	0	0	0	0	0	0	0	0	0	0	0	0	0	0	0	0	0	0	0	0	0
P70205	458	0.352186	0	83.395	H	WRSWKVNRYFTMDFKHRHPSLASSGVNGGTQ	H(0.352)R(0.352)H(0.296)PSLASSGVNGGTQLSILSK	0	0	0	0	0	0	0	0	0	0	0	0	0	0	0	0	0	0	0	0	0	0	0	0	0	0	0	0	0	0	0	0	0	0	0	0
P70205	460	0.89952	12.5574	119.62	H	SWKVNRYFTMDFKHRHPSLASSGVNGGTQLS	H(0.05)R(0.05)H(0.9)PSLASSGVNGGTQLSILSK(0.001)	1.01382e+08	0	0	5.8005e+07	0	0	2.78807e+07	0	0	4.68532e+07	0	0	1.57303e+07	0	0	2.98922e+07	0	0	9.34944e+07	0	0	6.21993e+07	0	0	3.55838e+07	0	0	3.52072e+07	0	0	8.93131e+07	0	0	8.63188e+07	0	0
P70288	391	0.999054	30.3411	97.469	H	HAPGVQMQAIPEDAVHEDSGDEDGEDPDKRI	MLPHAPGVQMQAIPEDAVH(0.999)EDSGDEDGEDPDK(0.001)R	2.87945e+08	0	0	256724565	0	0	2.94562e+08	0	0	2.4165e+08	0	0	310992180	0	0	1.83592e+08	0	0	2.62674e+08	0	0	2.17723e+07	0	0	5.75313e+08	0	0	1.4352e+08	0	0	2.54779e+08	0	0	1.6736e+08	0	0
P70349	42	0.99892	30.8179	87.088	H	IPAKIIFEDDRCLAFHDISPQAPTHFLVIPK	CLAFH(0.999)DISPQAPTHFLVIPK(0.001)	1.87131e+08	0	0	0	0	0	8.25988e+07	0	0	3.83841e+08	0	0	0	0	0	3.32489e+08	0	0	5.20412e+07	0	0	2.24537e+08	0	0	0	0	0	1.02692e+07	0	0	1.57102e+08	0	0	3.37474e+07	0	0
P70349	51	0.991394	22.5141	111.5	H	DRCLAFHDISPQAPTHFLVIPKKHISQISVA	CLAFH(0.006)DISPQAPTH(0.991)FLVIPK(0.003)	0	0	0	0	0	0	0	0	0	0	0	0	0	0	0	0	0	0	0	0	0	0	0	0	7.21415e+07	0	0	0	0	0	1.63991e+08	0	0	1.80709e+08	0	0
P70392	844	0.996003	24.8665	72.878	H	VSPASAFAIATAAAGHGSPPGFNNERTCDKE	YRQPGGQVADSAH(0.001)CSVSPASAFAIATAAAGH(0.996)GSPPGFNNER(0.003)	0	0	0	0	0	0	1.13915e+07	0	0	0	0	0	0	0	0	4.68824e+06	0	0	0	0	0	1.07823e+07	0	0	0	0	0	1.64897e+07	0	0	2.32041e+07	0	0	1.37766e+07	0	0
P70663	414	0.466965	1.12845	70.145	H	SSPNAEPSDEGNSREHSAGSCTNFQCKRGHI	K(0.158)AESSPNAEPSDEGNSR(0.36)EH(0.467)SAGSCTNFQCK(0.015)	0	0	0	0	0	0	0	0	0	0	0	0	0	0	0	0	0	0	0	0	0	0	0	0	0	0	0	0	0	0	0	0	0	0	0	0
P70704	433	0.964904	14.3923	95.654	H	VMQFKKCTIAGVAYGHVPEPEDYGCSPDEWQ	CTIAGVAYGH(0.965)VPEPEDYGCSPDEWQSSQFGDEK(0.035)	0	0	0	5.8464e+07	0	0	4.30761e+07	0	0	5.56486e+06	0	0	1.03457e+08	0	0	0	0	0	0	0	0	6.27709e+07	0	0	5.82008e+07	0	0	0	0	0	9.09516e+07	0	0	1.21956e+08	0	0
P70704	1133	1	65.9225	77.63	H	HVNLYRSESLQQNLLHGYAFSQDENGIVSQS	SESLQQNLLH(1)GYAFSQDENGIVSQSEVIR	4.60933e+07	0	0	0	0	0	1.73328e+07	0	0	4.03777e+07	0	0	0	0	0	4.37316e+07	0	0	5.50487e+07	0	0	5.69703e+07	0	0	2.2845e+07	0	0	4.8065e+07	0	0	3.57401e+07	0	0	0	0	0
P80560	195	0.99994	42.2012	58.251	H	KGEDSSPENILTYVAHTSALTYPPATRAKYP	GEDSSPENILTYVAH(1)TSALTYPPATR	3.23901e+07	0	0	1.43239e+07	0	0	0	0	0	3.02481e+07	0	0	2.07461e+07	0	0	2.89739e+07	0	0	0	0	0	0	0	0	0	0	0	2.78916e+07	0	0	3.71425e+07	0	0	3.58199e+07	0	0
P84309	670	0.993954	22.1709	73.435	H	AMIAKMNRQRTNSIGHNPPHWGAERPFYNHL	TNSIGH(0.994)NPPH(0.006)WGAERPFYNHLGGNQVSK	2.08624e+07	0	0	0	0	0	6.41495e+07	0	0	1.12947e+08	0	0	5.83789e+07	0	0	8.36688e+07	0	0	0	0	0	3.64164e+07	0	0	0	0	0	3.06031e+07	0	0	4.1142e+07	0	0	0	0	0
P97427	526	0.927488	9.05481	84.035	H	KHAAPAPSAKSSPSKHQPPPIRNLHQSNFSL	HAAPAPSAK(0.425)SSPSK(0.647)H(0.927)QPPPIR(0.001)	0	0	0	0	5.74573e+06	0	0	0	0	0	0	0	0	0	0	0	0	0	0	1.00853e+07	0	0	0	0	0	0	0	0	0	0	0	0	0	0	0	0
P97490	76	0.485708	0.622128	46.149	H	GVSRKASNPAGSGPNHHAPQLSSDSVLPLYS	K(0.093)ASNPAGSGPNH(0.486)H(0.421)APQLSSDSVLPLYSLGPGER	0	0	0	0	0	0	0	0	0	0	0	0	0	0	0	0	0	0	0	0	0	0	0	0	0	0	0	0	0	0	0	0	0	0	0	0
P97490	77	0.848097	10.2475	53.033	H	VSRKASNPAGSGPNHHAPQLSSDSVLPLYSL	K(0.08)ASNPAGSGPNH(0.072)H(0.848)APQLSSDSVLPLYSLGPGER	0	0	0	3.98695e+07	0	0	3.93542e+07	0	0	3.80879e+07	0	0	2.00517e+07	0	0	7.07088e+07	0	0	0	0	0	1.78686e+07	0	0	2.56109e+07	0	0	0	0	0	0	0	0	5.44527e+07	0	0
P97492	200	0.996154	24.3373	104.01	H	LAEAEGRPLREPGSSHLGSPDTARKKPKLKP	SPLYQECLLAEAEGRPLR(0.004)EPGSSH(0.996)LGSPDTAR	2.15544e+08	0	0	2.25229e+08	0	0	1.30438e+08	0	0	9.47625e+07	0	0	9.20745e+07	0	0	1.37924e+07	0	0	3.2043e+08	0	0	300634580	0	0	0	0	0	6.32465e+07	0	0	123148071	0	0	5.57528e+07	0	0
P97772	967	1	71.3986	122.34	H	KTLYNVEEEDNTPSTHFSPPSSPSMVVHRRG	TLYNVEEEDNTPSTH(1)FSPPSSPSMVVHR	0	0	0	0	0	0	0	0	0	1.94677e+07	0	0	1.38577e+07	0	0	0	0	0	0	0	0	0	0	0	0	0	0	9.2643e+06	0	0	0	0	0	1.43772e+07	0	0
P97820	684	0.815543	6.45594	76.208	H	GSSSGSSNSGSQPGSHPGSQSGSGERFRVRS	LVPRPGSGSSSGSSNSGSQPGSH(0.816)PGSQSGSGER(0.184)	0	0	0	5.30465e+06	0	0	0	0	0	0	0	0	0	0	0	4.23356e+06	0	0	0	0	0	0	0	0	0	0	0	4.54331e+06	0	0	1.38282e+07	0	0	0	0	0
Q01097	1145	0.995898	24.392	86.016	H	RDFYLDQFRTKENSPHWEHVDLTDIYKERSD	ENSPH(0.996)WEH(0.004)VDLTDIYK	1.43329e+07	0	0	1.3363e+07	0	0	2.18008e+07	0	0	6.87172e+06	0	0	1.11364e+07	0	0	8.98325e+06	0	0	1.89411e+07	0	0	3.02372e+07	0	0	2.32698e+07	0	0	0	0	0	0	0	0	0	0	0
Q01097	873	1	72.3484	108.73	H	PGMVFSISRGIYSCIHGVAIEERQSVMNSPT	GIYSCIH(1)GVAIEER(1)QSVMNSPTATMNNTHSNILR	0	9.59288e+06	0	0	0	0	0	2.3582e+07	0	0	1.72242e+07	0	0	1.28083e+07	0	0	1.82663e+07	0	9.95083e+06	5.04531e+07	0	0	2.44632e+07	0	0	2.42697e+07	0	0	1.36781e+07	0	0	0	0	0	1.2249e+07	0
Q01097	895	0.775711	5.85062	50.767	H	RQSVMNSPTATMNNTHSNILRLLRTAKNMAN	GIYSCIH(0.203)GVAIEER(0.996)QSVMNSPTATMNNTH(0.776)SNILR(0.025)	0	1.684e+07	0	0	0	0	0	0	0	0	0	0	0	0	0	0	0	0	0	0	0	0	0	0	0	0	0	0	0	0	0	0	0	0	0	0
Q01097	1302	0.999993	51.4203	131.54	H	NSKAQKKNRNKLRRQHSYDTFVDLQKEEAAL	QH(1)SYDTFVDLQKEEAALAPR	9.22751e+07	0	0	6.73315e+07	0	0	8.65413e+07	0	0	2.29604e+07	0	0	3.66658e+07	0	0	1.94735e+07	0	0	0	0	0	7.35628e+07	0	0	8.0121e+07	0	0	1.96074e+07	0	0	2.48642e+07	0	0	2.5292e+07	0	0
Q01097	1066	0.980148	18.3327	65.244	H	GHDDLIRSDVSDISTHTVTYGNIEGNAAKRR	YSGH(0.14)DDLIR(0.871)SDVSDISTH(0.98)TVTYGNIEGNAAK(0.009)	0	1.18612e+07	0	0	0	0	0	0	0	0	0	0	0	0	0	0	0	0	0	0	0	0	0	0	0	0	0	0	0	0	0	0	0	0	0	0
Q03141	402	0.918371	12.6477	116.51	H	VRPNSDLSNSTGQSPHHKGQRSVSSSQKQRR	VRPNSDLSNSTGQSPH(0.918)H(0.05)K(0.032)	0	0	0	0	0	0	1.45105e+07	0	0	0	0	0	0	0	0	0	0	0	1.19082e+07	0	0	7.32345e+06	0	0	0	0	0	0	0	0	1.71871e+07	0	0	0	0	0
Q03717	523	1	65.2685	149.82	H	EQGSPEKARSSSSPQHLNVQQLQDMYSKMAK	SSSSPQH(1)LNVQQLQDMYSK	2.16789e+07	0	0	4.07253e+07	0	0	2.27197e+07	0	0	6.5822e+06	0	0	1.81628e+07	0	0	1.22735e+07	0	0	2.83008e+07	0	0	2.94998e+07	0	0	2.87897e+07	0	0	0	0	0	1.30238e+07	0	0	5.5273e+06	0	0
Q04447	97	0.830358	9.9095	44.955	H	YDVFKDLFDPIIEERHGGYQPSDEHKTDLNP	H(0.83)GGYQPSDEH(0.085)K(0.085)TDLNPDNLQGGDDLDPNYVLSSR	0	0	0	1.06733e+07	0	0	0	0	0	0	0	0	0	0	0	0	0	0	0	0	0	0	0	0	0	0	0	0	0	0	0	0	0	0	0	0
Q04447	106	0.54664	0.833065	73.227	H	PIIEERHGGYQPSDEHKTDLNPDNLQGGDDL	H(0.002)GGYQPSDEH(0.547)K(0.451)TDLNPDNLQGGDDLDPNYVLSSR	0	0	0	0	0	0	0	0	0	0	0	0	0	0	0	0	0	0	0	0	0	0	0	0	0	0	0	0	0	0	0	0	0	4.6508e+06	0	0
Q04447	191	0.954069	13.1802	90.964	H	LKSMTEAEQQQLIDDHFLFDKPVSPLLLASG	SMTEAEQQQLIDDH(0.954)FLFDK(0.046)PVSPLLLASGMAR	6.99865e+06	0	0	0	0	0	0	0	0	0	0	0	0	0	0	6.7565e+06	0	0	0	0	0	0	0	0	0	0	0	0	0	0	0	0	0	1.10712e+07	0	0
Q06335	544	0.925335	9.94769	51.425	H	DVRVSSEESEEIPPFHPLHPFPSLSENEDTQ	VSSEESEEIPPFH(0.925)PLH(0.812)PFPSLSENEDTQPELYHPMK(0.263)	0	0	0	0	0	0	0	0	0	0	0	0	0	0	0	0	1.01569e+07	0	0	0	0	0	0	0	0	0	0	0	0	0	0	0	0	0	1.44515e+07	0
Q06335	547	0.811939	5.93482	51.425	H	VSSEESEEIPPFHPLHPFPSLSENEDTQPEL	VSSEESEEIPPFH(0.925)PLH(0.812)PFPSLSENEDTQPELYHPMK(0.263)	0	0	0	0	0	0	0	0	0	0	0	0	0	0	0	0	1.01569e+07	0	0	0	0	0	0	0	0	0	0	0	0	0	0	0	0	0	1.44515e+07	0
Q07113	2240	0.995254	23.2167	72.523	H	CGKDKTKSVSSTIFFHCDPLVKDGIPEFSHE	TKSVSSTIFFH(0.995)CDPLVK(0.005)	2.26941e+07	0	0	2.72044e+07	0	0	1.0094e+07	0	0	1.41247e+07	0	0	2.17457e+07	0	0	0	0	0	1.97661e+07	0	0	2.56499e+07	0	0	2.00602e+07	0	0	1.26739e+07	0	0	2.60149e+07	0	0	0	0	0
Q0KK55	429	0.990683	20.4161	136.2	H	EYKPSPSPVDAGDSDHEGHIPRSEEKIPEES	SPGASGQLEASSPSQGSVEYKPSPSPVDAGDSDH(0.991)EGH(0.009)IPR	0	0	0	1.58683e+07	0	0	0	0	0	1.72989e+07	0	0	1.93002e+07	0	0	2.1537e+07	0	0	8.58237e+06	0	0	0	0	0	6.41916e+06	0	0	2.00974e+07	0	0	0	0	0	0	0	0
Q0P5W1	239	0.999998	56.1264	79.346	H	WDLASGKLLRSITDAHPPGTAILHIKFTDDP	LLR(1)SITDAH(1)PPGTAILH(0.657)IK(0.343)	0	0	0	0	0	0	0	0	0	0	0	0	0	0	0	0	0	0	0	0	0	0	0	0	0	0	0	0	0	0	0	0	0	0	0	0
Q0P5W1	247	0.995323	23.2802	79.346	H	LRSITDAHPPGTAILHIKFTDDPTLAICNDS	LLR(1)SITDAH(1)PPGTAILH(0.995)IK(0.005)	0	0	0	0	0	0	0	0	0	0	0	0	0	0	0	0	0	0	0	0	0	0	0	0	0	0	0	0	0	0	0	0	0	0	0	0
Q14BB9	31	0.998755	29.0432	55.171	H	WNQLDRSDVAVPLTLHGYSDPGSEESGADCS	SDVAVPLTLH(0.999)GYSDPGSEESGADCSVSR(0.001)	0	0	0	0	0	0	4.56518e+06	0	0	0	0	0	4.3276e+06	0	0	0	0	0	0	0	0	0	0	0	0	0	0	0	0	0	0	0	0	0	0	0
Q2PFD7	999	0.999973	45.6345	122.66	H	LLTTDGNEPVGLKKSHSSPSLNPDASPVTAK	SH(1)SSPSLNPDASPVTAK	0	0	0	3.39439e+07	0	0	7.76874e+06	0	0	0	0	0	0	0	0	0	0	0	0	0	0	0	0	0	0	0	0	0	0	0	0	0	0	0	0	0
Q3TDK6	226	0.999989	49.9574	105.95	H	PTSTKNFRPAGGAVLHSPGAMFEWGSQRLEV	NFRPAGGAVLH(1)SPGAMFEWGSQR	7.49273e+07	0	0	1.08296e+08	0	0	1.28932e+08	0	0	9.27534e+07	0	0	4.92595e+07	0	0	7.14333e+07	0	0	1.03168e+08	0	0	1.04031e+08	0	0	4.32654e+07	0	0	0	0	0	6.20224e+07	0	0	4.36764e+06	0	0
Q3TES0	164	0.93348	11.4715	84.602	H	ERPSSCCAAAGALLQHASPAALGKGVLSRRP	ERPSSCCAAAGALLQH(0.933)ASPAALGK(0.067)	0	0	0	0	0	0	0	0	0	0	0	0	0	0	0	0	0	0	0	0	0	0	0	0	0	0	0	0	0	0	0	0	0	7.26389e+06	0	0
Q3TES0	134	0.999305	31.6954	117.37	H	PQPAPSSRVQTPQSPHQHPVAPGAIADKEKE	VQTPQSPH(0.999)QH(0.001)PVAPGAIADKEK	0	0	0	1.48809e+07	0	0	1.01514e+07	0	0	2.33365e+07	0	0	3.21551e+07	0	0	1.2923e+07	0	0	6.7362e+06	0	0	1.16006e+07	0	0	9.91072e+06	0	0	2.65778e+07	0	0	0	0	0	2.87992e+07	0	0
Q3TES0	136	0.817746	6.97618	78.508	H	PAPSSRVQTPQSPHQHPVAPGAIADKEKERP	VQTPQSPH(0.164)QH(0.818)PVAPGAIADK(0.01)EK(0.008)	0	0	0	0	0	0	0	0	0	0	0	0	0	0	0	0	0	0	0	0	0	2.29901e+06	0	0	0	0	0	0	0	0	0	0	0	0	0	0
Q3THG9	81	0.999689	35.0778	141.37	H	DISVLRVTRRGAQADHFTESPLSPGSQVQVR	GAQADH(1)FTESPLSPGSQVQVR	0	0	0	0	0	0	0	0	0	0	0	0	0	0	0	0	0	0	0	0	0	0	0	0	0	0	0	0	0	0	0	0	0	4.98597e+06	0	0
Q3TWN3	758	0.854804	10.5599	57.735	H	SPGENKSPPRPCGLNHSDSLSRSDRIDAMTP	TEVLAAGSPGENK(0.075)SPPR(0.059)PCGLNH(0.855)SDSLSR(0.011)	0	0	0	2.40362e+07	0	0	0	0	0	0	0	0	0	0	0	2.4383e+07	0	0	3.72116e+07	0	0	0	0	0	0	0	0	0	0	0	0	0	0	0	0	0
Q3TYD6	780	0.5	0	85.99	H	QGDTRGQNEGAGVRRHSGTSPQASPALLTEE	R(0.5)H(0.5)SGTSPQASPALLTEEGSPTAPTDPILK(0.052)PEETK(0.948)	0	0	0	0	0	0	0	3.38832e+06	0	0	0	0	0	0	0	0	0	0	0	0	0	0	0	0	0	0	0	0	0	0	0	0	0	0	0	0
Q3U214	1169	0.41598	0	41.137	H	NVSPSSSSPASPATGHTRPSSLHGLAAKLGP	SPAPDAPTDTASPPNVSPSSSSPASPATGH(0.416)TR(0.416)PSSLH(0.09)GLAAK(0.078)	0	0	0	0	0	0	0	0	0	0	0	0	0	0	0	0	0	0	0	0	0	0	0	0	0	0	0	0	0	0	0	0	0	0	0	0
Q3U3E2	155	0.999875	39.0303	68.487	H	PPLLGTVSSPSSSPTHLWPSEVIAAPPSARV	SSPPR(1)PQPPPPLLGTVSSPSSSPTH(1)LWPSEVIAAPPSAR	0	3.82082e+07	0	0	3.22641e+07	0	0	2.65549e+07	0	0	1.48691e+07	0	0	2.36934e+07	0	0	9.11107e+06	0	0	0	0	0	3.96494e+07	0	0	2.82796e+07	0	0	0	0	0	2.38416e+07	0	0	2.26918e+07	0
Q3UE31	323	0.990259	20.1567	78.736	H	KRKVPRNRIAEMKKSHSANDSEEFFREDDSG	SH(0.99)SANDSEEFFR(0.01)EDDSGADLHNATNLR	1.05042e+07	0	0	1.93267e+07	0	0	8.22559e+06	0	0	2.13566e+07	0	0	1.77058e+07	0	0	3.77068e+07	0	0	0	0	0	0	0	0	1.643e+07	0	0	2.71069e+07	0	0	1.96769e+07	0	0	1.59141e+07	0	0
Q3UH99	500	0.499007	0	106.42	H	QSQTAAKRHAFASRRHNTVEQLHYIPGHHTC	R(0.499)H(0.499)NTVEQLH(0.002)YIPGHHTCYTASK	0	0	0	0	0	0	0	0	0	0	0	0	0	0	0	0	0	0	0	0	0	0	0	0	0	0	0	0	0	0	0	0	0	0	0	0
Q3UH99	507	0.993553	25.5323	106.89	H	RHAFASRRHNTVEQLHYIPGHHTCYTASKTE	R(0.003)H(0.003)NTVEQLH(0.994)YIPGHHTCYTASK(0.001)	0	0	0	0	0	0	0	0	0	0	0	0	0	0	0	0	0	0	0	0	0	3.69608e+06	0	0	0	0	0	0	0	0	0	0	0	4.46538e+06	0	0
Q3UHB8	309	1	68.6715	97.214	H	LVPLTARSFSLGDLSHSPQTAQHVERIVRQV	SFSLGDLSH(1)SPQTAQHVER	4.77146e+07	0	0	3.42178e+07	0	0	3.23576e+07	0	0	3.6466e+07	0	0	5.04884e+07	0	0	3.75469e+07	0	0	5.40263e+07	0	0	6.12599e+07	0	0	4.29721e+07	0	0	5.20811e+07	0	0	5.713e+07	0	0	6.46896e+07	0	0
Q3UHD9	582	0.999822	37.4967	86.168	H	QQLLAACKSLPSSPSHSAASTPVAGQASNGG	SLPSSPSH(1)SAASTPVAGQASNGGHTSDYSSSLPSSPNVGHR	5.82686e+06	0	0	0	0	0	0	0	0	0	0	0	0	0	0	0	0	0	0	0	0	0	0	0	0	0	0	0	0	0	6.00867e+06	0	0	0	0	0
Q3UHK6	185	0.772526	5.46528	104.53	H	LQNHPRLRTPPPPLPHAHTPNQHHAASINSL	LR(0.219)TPPPPLPH(0.773)AH(0.008)TPNQHHAASINSLNR	0	0	0	0	0	0	0	0	0	0	0	0	0	0	0	0	0	0	1.39217e+07	0	0	0	0	0	9.09026e+06	0	0	0	0	0	0	0	0	0	0	0
Q3UJU9	45	1	149.311	182.37	H	LYSQRWKRTQRHGRSHSLPNSLDYAQASERG	SH(1)SLPNSLDYAQASER	2.27903e+07	0	0	5.68434e+07	0	0	2.62866e+07	0	0	3.15566e+07	0	0	3.19054e+07	0	0	1.55312e+07	0	0	1.63999e+07	0	0	2.87998e+07	0	0	0	0	0	2.56822e+07	0	0	5.0185e+07	0	0	2.98115e+07	0	0
Q3UTJ2	903	0.991147	20.4955	67.658	H	PHSASFPDVDTTSNYHAQDYGSALSLQDHES	MPH(0.009)SASFPDVDTTSNYH(0.991)AQDYGSALSLQDHESPR	0	0	0	1.53836e+07	0	0	1.08266e+07	0	0	0	0	0	0	0	0	0	0	0	0	0	0	2.9235e+07	0	0	0	0	0	0	0	0	8.98568e+06	0	0	0	0	0
Q4V9Z5	882	0.998676	28.7742	60.382	H	YTKLQGKSLFGFSGSHSYSPITVESDFSNPL	SLFGFSGSH(0.999)SYSPITVESDFSNPLYEAGDTR(0.001)	8.53623e+06	0	0	1.31677e+07	0	0	8.24497e+06	0	0	9.88494e+06	0	0	8.5049e+06	0	0	1.36135e+07	0	0	2.10971e+07	0	0	0	0	0	8.97652e+06	0	0	1.80507e+07	0	0	1.90111e+07	0	0	1.05743e+07	0	0
Q569Z6	298	0.436028	0.767871	50.879	H	MGSSMSGGAGYQSGAHQGQFDHGSGSLSPSK	PSPPLSNASQMGSSMSGGAGYQSGAH(0.436)QGQFDH(0.365)GSGSLSPSK(0.103)K(0.096)	0	0	0	0	0	0	0	0	0	0	0	0	0	0	0	0	0	0	0	0	0	0	0	0	0	0	0	0	0	0	0	0	0	0	0	0
Q5DTY9	136	0.999999	62.431	80.132	H	LLAPEDVKQSPDEFCHSDFEDASQGSDTRIC	LLAPEDVK(1)QSPDEFCH(1)SDFEDASQGSDTR	0	4.08246e+07	0	0	1.94512e+07	0	0	2.28255e+07	0	0	1.16305e+07	0	0	0	0	0	0	0	0	6.35948e+07	0	0	39573593	0	0	5.02195e+07	0	0	0	0	0	2.68185e+07	0	0	0	0
Q5DU25	730	1	121.524	177.57	H	PATGLCKQTYQRETRHSWDSPAFNNDVVQRR	H(1)SWDSPAFNNDVVQR	1.2585e+07	0	0	2.44649e+07	0	0	2.26951e+07	0	0	0	0	0	4.2744e+06	0	0	0	0	0	0	0	0	2.37083e+07	0	0	2.0636e+07	0	0	0	0	0	0	0	0	0	0	0
Q5DU25	221	1	119.478	137.39	H	SRGASRSSSPGAGGGHSTSTSTSPATTLQRN	SSSPGAGGGH(1)STSTSTSPATTLQR	1.69147e+07	0	0	3.52386e+07	0	0	1.6952e+07	0	0	1.1864e+07	0	0	1.68327e+07	0	0	2.38724e+07	0	0	2.73017e+07	0	0	1.4472e+07	0	0	1.91479e+07	0	0	4.66276e+06	0	0	0	0	0	1.2297e+07	0	0
Q5DU28	1373	0.772736	5.43463	52.721	H	DPGSDDNNLNSIFYEHLTRTLQESLCGDLVL	MDNSNTR(0.999)LAVQMER(0.007)DPGSDDNNLNSIFYEH(0.773)LTR(0.221)	0	0	0	0	0	0	0	0	0	0	0	0	0	0	0	0	0	0	0	0	0	0	0	0	0	0	0	0	0	0	0	0	0	0	1.78697e+06	0
Q5EG47	161	0.93671	12.3054	56.139	H	VVHRDLKPENVLLDAHMNAKIADFGLSNMMS	H(0.019)MVVH(0.019)R(0.019)DLK(0.943)PENVLLDAH(0.937)MNAK(0.063)	0	0	0	0	8.95455e+06	0	0	5.48716e+07	0	0	4.97535e+07	0	0	0	0	0	2.56292e+07	0	0	0	0	0	0	0	0	0	0	0	0	0	0	0	0	0	0	0
Q5F226	4212	1	52.1617	52.162	H	HPEAMQGPLPPSPRRHVSPAVMPDPAGLYGG	R(1)H(1)VSPAVMPDPAGLYGGFPFPLELENK(1)	0	0	0	0	0	0	0	0	0	0	0	0	0	0	0	0	0	0	0	0	9.26774e+07	0	0	0	0	0	0	0	0	0	0	0	0	0	0	0
Q5NCX5	1341	1	58.4566	58.457	H	WGPPPAASPLKSCEYHALCSRFQELLLLPED	SCEYH(1)ALCSR(1)FQELLLLPEDYFMPPPK(1)	0	0	2.58606e+07	0	0	2.2649e+07	0	0	2.76355e+07	0	0	1.48639e+07	0	0	1.11903e+07	0	0	1.4347e+07	0	0	5.01853e+07	0	0	0	0	0	3.59345e+07	0	0	0	0	0	1.73532e+07	0	0	0
Q5RJI5	518	0.995692	23.6855	77.776	H	PGPPGSPRSSGGTPLHSPLHTPRASPTGTPG	SSGGTPLH(0.996)SPLH(0.004)TPR	4.40914e+07	0	0	9.18485e+07	0	0	0	0	0	0	0	0	3.15154e+07	0	0	2.60359e+07	0	0	0	0	0	2.22358e+07	0	0	0	0	0	1.76345e+07	0	0	4.53149e+07	0	0	0	0	0
Q5SRX1	163	0.998799	29.198	104.81	H	GIEFPMADLDALSPIHTPQRSVPEMDPAATI	GIEFPMADLDALSPIH(0.999)TPQR(0.001)	6.99589e+07	0	0	7.42818e+07	0	0	4.78727e+07	0	0	8.22563e+07	0	0	6.94639e+07	0	0	7.74062e+07	0	0	7.91686e+07	0	0	0	0	0	6.54238e+07	0	0	8.62727e+07	0	0	1.33158e+08	0	0	6.85745e+07	0	0
Q5SSM3	638	0.915239	10.3334	49.825	H	QPAASPSQLPADQSPHTLRKVSKKVAPIPPK	GSPGSIQGTPCPGTQLGPQPAASPSQLPADQSPH(0.915)TLR(0.085)	0	0	0	0	0	0	0	0	0	0	0	0	0	0	0	6.96216e+06	0	0	0	0	0	0	0	0	0	0	0	0	0	0	0	0	0	0	0	0
Q5SW75	460	0.9997	35.64	103.31	H	ILLASKQRHNKLWRSHSDSDLSDHHEPICKP	SH(1)SDSDLSDHHEPICKPGLELNKK	0	0	0	0	0	0	0	0	0	0	0	0	0	0	0	0	0	0	0	0	0	0	0	0	0	0	0	0	0	0	0	0	0	1.3878e+07	0	0
Q5SW75	468	0.673533	3.72966	79.341	H	HNKLWRSHSDSDLSDHHEPICKPGLELNKKE	SH(0.038)SDSDLSDH(0.674)H(0.285)EPICK(0.002)PGLELNKK	0	0	0	0	0	0	0	0	0	0	0	0	6.51873e+06	0	0	0	0	0	0	0	0	0	0	0	0	0	0	0	0	0	0	0	0	0	0	0
Q5SW75	469	0.56018	1.05113	99.343	H	NKLWRSHSDSDLSDHHEPICKPGLELNKKEM	SHSDSDLSDH(0.44)H(0.56)EPICKPGLELNKK	7.15573e+06	0	0	0	0	0	1.10465e+07	0	0	1.75221e+07	0	0	1.00226e+07	0	0	1.1443e+07	0	0	0	0	0	1.37669e+07	0	0	0	0	0	0	0	0	2.1582e+07	0	0	2.94423e+07	0	0
Q60520	283	0.990129	20.0498	65.134	H	PLPPYASPRSPPVQPHTPVTISLGTAPSLQN	SPPVQPH(0.99)TPVTISLGTAPSLQNNQPVEFNHAINYVNK(0.01)	0	0	0	0	0	0	0	0	0	0	0	0	0	0	0	0	0	0	0	0	0	0	0	0	1.80425e+07	0	0	0	0	0	0	0	0	0	0	0
Q60673	107	0.987269	19.5624	53.779	H	QLMSQGLSWHDDLTQHVISQEMERIPRLRPP	QLMSQGLSWH(0.002)DDLTQH(0.987)VISQEMER(0.011)	8.79157e+06	0	0	1.2108e+07	0	0	0	0	0	0	0	0	8.5661e+06	0	0	6.21058e+06	0	0	0	0	0	1.06261e+07	0	0	1.42992e+07	0	0	2.0559e+07	0	0	0	0	0	8.63111e+06	0	0
Q60771	201	0.564283	1.12293	86.699	H	GENRFYYSSGSSSPTHAKSAHV_________	FYYSSGSSSPTH(0.564)AK(0.436)	0	0	0	0	0	0	0	0	0	0	0	0	0	0	0	0	0	0	2.96301e+08	0	0	0	0	0	0	0	0	0	0	0	0	0	0	0	0	0
Q60902	104	1	122.987	146.28	H	VTLSSLSLTMPPPKFHDTSSPLMATQSSAET	FH(1)DTSSPLMATQSSAETHWAVR	7.14051e+07	0	0	1.12825e+08	0	0	6.81017e+07	0	0	9.27792e+07	0	0	7.73193e+07	0	0	6.72173e+07	0	0	1.11275e+08	0	0	1.51874e+08	0	0	158340502	0	0	6.89578e+07	0	0	9.63735e+07	0	0	9.52958e+07	0	0
Q61081	9	0.999996	54.2047	106.88	H	_______MVDYSVWDHIEVSDDEDETHPNID	VDYSVWDH(1)IEVSDDEDETHPNIDTASLFR	1.44824e+08	0	0	1.39387e+07	0	0	1.61218e+08	0	0	1.20572e+08	0	0	1.58878e+08	0	0	1.89728e+08	0	0	1.72419e+08	0	0	3.20538e+08	0	0	4.00937e+08	0	0	2.57739e+08	0	0	3.31223e+08	0	0	2.74132e+08	0	0
Q61081	20	0.99998	47.3423	90.633	H	SVWDHIEVSDDEDETHPNIDTASLFRWRHQA	VDYSVWDHIEVSDDEDETH(1)PNIDTASLFR	5.6037e+07	0	0	0	0	0	4.71379e+06	0	0	4.1147e+07	0	0	1.28785e+07	0	0	0	0	0	5.35049e+06	0	0	1.18779e+07	0	0	2.2319e+07	0	0	7.75304e+06	0	0	4.44041e+06	0	0	2.50939e+07	0	0
Q61137	202	1	80.2555	93.73	H	PQPQKSASAEAANEIHYIPSVLIGGHGRESL	SASAEAANEIH(1)YIPSVLIGGHGR	7.12459e+07	0	0	6.5496e+07	0	0	2.82951e+06	0	0	0	0	0	2.68015e+07	0	0	3.69473e+07	0	0	133073002	0	0	1.0385e+08	0	0	6.56015e+07	0	0	3.59152e+07	0	0	5.20879e+07	0	0	4.95965e+07	0	0
Q61161	293	0.999984	47.9535	85.849	H	PPALLTQLLDKASDPHLGTLSPEDSELETHD	ASDPH(1)LGTLSPEDSELETHDMFPDTIHSR	1.56878e+07	0	0	1.60184e+07	0	0	1.54033e+07	0	0	2.75976e+07	0	0	3.31489e+07	0	0	3.28092e+07	0	0	0	0	0	0	0	0	0	0	0	2.48513e+07	0	0	2.64096e+07	0	0	2.61309e+07	0	0
Q61165	693	0.5	0	159.58	H	RQLEQKITNYLTVPAHKLDSPTLSRARIGSD	ITNYLTVPAH(0.5)K(0.5)LDSPTLSR	0	0	0	3.48939e+07	0	0	0	0	0	0	0	0	0	0	0	0	0	0	0	0	0	0	0	0	0	0	0	0	0	0	0	0	0	0	0	0
Q61316	501	0.768057	5.26322	148.3	H	VHGIFSVSSAALVEVHKSEESEEPMETDQNA	VNVH(0.002)GIFSVSSAALVEVH(0.768)K(0.229)SEESEEPMETDQNAK(0.002)	0	0	0	1.2052e+07	0	0	3.34047e+06	0	0	4.46956e+06	0	0	0	0	0	0	0	0	4.42236e+07	0	0	8.39642e+06	0	0	2.69373e+07	0	0	0	0	0	1.85277e+07	0	0	0	0	0
Q61410	87	0.999915	43.8213	64.318	H	LQSKCIQLNKLQDVIHVQGGSPLQASPDKVP	LQDVIH(1)VQGGSPLQASPDK(0.995)VPLDVH(0.004)R(0.001)	0	1.42125e+07	0	9.40815e+06	0	0	1.42698e+07	0	0	1.06044e+07	0	0	1.35835e+07	0	0	1.53333e+07	0	0	1.78234e+07	0	0	2.49323e+07	1.21082e+07	0	1.19403e+07	0	0	1.22144e+07	0	0	1.62219e+07	1.05318e+07	0	1.85879e+07	1.0038e+07	0
Q61423	147	0.999998	57.723	68.234	H	EEEEEEGRFYYSEEDHGDGCSYTDLLPQDDG	FYYSEEDH(1)GDGCSYTDLLPQDDGGGGGYSSVR	1.39938e+07	0	0	1.27872e+07	0	0	1.15346e+07	0	0	8.82802e+06	0	0	1.11046e+07	0	0	1.71211e+07	0	0	1.79432e+07	0	0	1.15146e+07	0	0	0	0	0	8.97171e+06	0	0	1.26015e+07	0	0	1.57485e+07	0	0
Q61768	929	0.999693	36.8635	130.01	H	RGHSAQIAKPIRPGQHPAASPTHPGTVRGGG	PIRPGQH(1)PAASPTHPGTVR	2.37576e+08	0	0	0	0	0	2.55927e+08	0	0	3.35923e+08	0	0	9.0312e+07	0	0	3.3115e+08	0	0	1.34247e+08	0	0	1.45179e+08	0	0	2.91457e+08	0	0	3.31292e+07	0	0	1.86037e+08	0	0	2.75038e+08	0	0
Q61768	936	0.999353	32.8325	215.02	H	AKPIRPGQHPAASPTHPGTVRGGGSFVQNNQ	PIRPGQHPAASPTH(0.999)PGTVR(0.001)	4.47038e+08	0	0	3.05049e+08	0	0	4.04356e+07	0	0	5.88881e+08	0	0	1.97735e+08	0	0	5.14872e+08	0	0	1.89343e+08	0	0	1.27732e+08	0	0	4.99837e+08	0	0	2.66751e+08	0	0	2.93686e+08	0	0	3.73816e+06	0	0
Q62188	534	0.446778	0	58.688	H	TRGSPTRPNPPVRNLHQSGFSLSGTQVDEGV	GSPTR(0.106)PNPPVR(0.447)NLH(0.447)QSGFSLSGTQVDEGVR	0	0	0	0	0	0	0	0	0	0	0	0	0	0	0	0	0	0	0	0	0	0	0	0	0	0	0	0	0	0	0	0	0	0	0	0
Q62261	2310	0.999677	34.9065	106.42	H	NTWIQAISSAISSDKHDTSASTQSTPASSRA	DDEEMNTWIQAISSAISSDK(1)H(1)DTSASTQSTPASSR(0.001)	0	1.13201e+07	0	2.58623e+07	1.82818e+07	0	2.65511e+07	2.99593e+07	0	2.31055e+07	2.39778e+07	0	0	2.13598e+07	0	0	2.31759e+07	0	3.13503e+07	1.70813e+07	0	2.5045e+07	2.35487e+07	0	4.08466e+07	3.16219e+07	0	4.83704e+07	2.29104e+07	0	0	3.41433e+07	0	0	3.39417e+07	0
Q62261	1488	0.970371	15.6208	157.75	H	PLSERKHNLLASKEIHQFNRDVEDEILWVGE	HNLLASK(0.003)EIH(0.97)QFNR(0.027)	0	0	0	0	0	0	0	0	0	0	0	0	0	0	0	0	0	0	0	0	0	0	0	0	0	0	0	0	0	0	0	0	0	0	0	0
Q62277	78	0.999941	42.3194	141.71	H	SALNIEVEFEYPFRLHQVYFDAPSCVKGGTT	LH(1)QVYFDAPSCVK	4.5613e+07	0	0	3.2324e+07	0	0	3.72369e+07	0	0	1.95406e+07	0	0	2.48905e+07	0	0	3.08835e+07	0	0	8.1143e+07	0	0	8.23174e+07	0	0	0	0	0	4.64934e+07	0	0	2.8416e+07	0	0	2.95739e+07	0	0
Q62318	65	0.953929	15.0589	88.927	H	SSPAGGGGEAQELLEHCGVCRERLRPERDPR	R(0.03)PAASSAAAASAAASSPAGGGGEAQELLEH(0.954)CGVCR(0.016)	0	0	0	8.73203e+07	0	0	0	0	0	0	0	0	0	0	0	115809484	0	0	4.32404e+07	0	0	4.16375e+08	0	0	0	0	0	6.1905e+07	0	0	0	0	0	2.99229e+07	0	0
Q62433	6	0.452715	0	70.802	H	__________MSRELHDVDLAEVKPLVEKGE	SR(0.453)ELH(0.453)DVDLAEVK(0.075)PLVEK(0.019)	0	0	0	0	0	0	0	0	0	0	0	0	0	0	0	0	0	0	0	0	0	0	0	0	0	0	0	0	0	0	0	0	0	0	0	0
Q640M6	243	0.999762	39.7439	56.039	H	PALIGHRGAPMLAPEHTVMSFRKALEQRLYG	PALIGHRGAPMLAPEH(1)TVMSFR(1)	0	0	0	0	4.20216e+06	0	0	7.31882e+06	0	0	0	0	0	0	0	0	0	0	0	0	0	0	1.0574e+07	0	0	0	0	0	0	0	0	0	0	0	0	0
Q64322	12	0.564737	0.96896	79.693	H	____MATPVPPPSPRHLRLLRLLLSGLILGA	MATPVPPPSPR(0.458)H(0.565)LR(0.874)LLR(0.103)	0	0	0	0	0	0	0	0	0	0	0	0	0	0	0	0	0	0	0	0	0	0	0	0	0	0	0	0	0	0	0	0	0	0	0	0
Q64511	299	1	73.1104	73.11	H	VKDKLDETGVALKVIHELANERWDVCLTLSE	DK(1)LDETGVALK(1)VIH(1)ELANER(1)	0	0	4.47979e+07	0	0	1.53415e+08	0	0	7.97891e+07	0	0	2.425e+08	0	0	4.14319e+07	0	0	0	0	0	1.80419e+08	0	0	4.31077e+07	0	0	1.89157e+08	0	0	1.10142e+08	0	0	9.66044e+07	0	0	0
Q64700	1057	0.919358	10.5721	61.616	H	RRVQLSQSHPIYISPHNNEAMPSPREKIFYY	RVQLSQSHPIYISPH(0.919)NNEAMPSPR(0.081)	0	0	0	0	0	0	0	0	0	0	0	0	0	0	0	8.23627e+06	0	0	0	0	0	9.9572e+06	0	0	0	0	0	0	0	0	1.63783e+06	0	0	0	0	0
Q68EF6	494	0.999998	56.1123	80.96	H	YKADSFSEGDDLSQGHLAEPCFLRAGGDLSL	ADSFSEGDDLSQGH(1)LAEPCFLR	6.85382e+06	0	0	6.36824e+06	0	0	4.96852e+06	0	0	0	0	0	3.71154e+06	0	0	0	0	0	0	0	0	0	0	0	0	0	0	0	0	0	0	0	0	0	0	0
Q68FH0	1009	1	92.5749	150.14	H	RDLRSIYKKDGWNQNHFITPVSTLERDRFKS	DGWNQNH(1)FITPVSTLER	0	0	0	9.14828e+06	0	0	3.95055e+06	0	0	0	0	0	4.20985e+06	0	0	3.7386e+06	0	0	0	0	0	0	0	0	6.74616e+06	0	0	6.68883e+06	0	0	0	0	0	13009730	0	0
Q68FH0	429	0.828281	6.83362	113.54	H	YEGRTYYSPVYRSPNHGTVELQGSQTALYRT	TYYSPVYR(0.172)SPNH(0.828)GTVELQGSQTALYR	1.63507e+07	0	0	0	0	0	0	0	0	0	0	0	5.09396e+06	0	0	0	0	0	1.65304e+07	0	0	1.19322e+07	0	0	0	0	0	0	0	0	1.84428e+07	0	0	5.31533e+06	0	0
Q69ZH9	326	0.666666	0	97.346	H	RARSASQDRLEDVTTHHPWPCSTSQDALSQL	SASQDR(0.667)LEDVTTH(0.667)H(0.667)PWPCSTSQDALSQLGQEGWHR	0	8.50855e+06	0	0	1.01294e+07	0	0	6.86316e+06	0	0	1.14776e+07	0	2.32879e+07	1.13061e+07	0	2.42561e+07	1.32908e+07	0	0	0	0	0	0	0	3.25597e+07	2.02035e+07	0	2.58406e+07	1.65706e+07	0	0	3.1524e+07	0	1.86753e+07	1.51929e+07	0
Q69ZH9	327	0.94727	12.5442	99.859	H	ARSASQDRLEDVTTHHPWPCSTSQDALSQLG	LEDVTTH(0.053)H(0.947)PWPCSTSQDALSQLGQEGWHR	1.56954e+07	8.50855e+06	0	2.44766e+07	1.01294e+07	0	2.08975e+07	6.86316e+06	0	2.32995e+07	1.14776e+07	0	0	1.13061e+07	0	0	1.32908e+07	0	3.54903e+07	0	0	0	0	0	0	2.02035e+07	0	0	1.65706e+07	0	0	3.1524e+07	0	2.73877e+07	1.51929e+07	0
Q6GQW0	63	1	167.4	178.2	H	GGSCWPPLADSMHSRHNSFDTVNTALVEDSE	H(1)NSFDTVNTALVEDSEGLDCAGQHCSR	0	0	0	0	0	0	0	0	0	0	0	0	1.13747e+07	0	0	0	0	0	0	0	0	0	0	0	0	0	0	0	0	0	6.76894e+06	0	0	1.40119e+07	0	0
Q6GYP7	770	1	76.5261	120.44	H	DIDDAQILPRSTRVRHFSQSEDTGNEVFGAL	H(1)FSQSEDTGNEVFGALHEEQPLPR	5.75704e+06	0	0	1.17672e+07	0	0	8.51625e+06	0	0	9.50459e+06	0	0	2.6826e+07	0	0	1.4441e+07	0	0	0	0	0	0	0	0	0	0	0	0	0	0	0	0	0	1.34694e+07	0	0
Q6GYP7	1083	0.833397	4.15513	47.395	H	LGILGDVNAIMDPEIHAQVFDYLCELWQNLA	RMLGILGDVNAIMDPEIH(0.833)AQVFDYLCELWQNLAK(0.566)IR(0.6)	0	1.00122e+08	0	0	9.17007e+07	0	0	1.04256e+08	0	0	4.70018e+07	0	0	3.04774e+07	0	0	4.48108e+07	0	0	0	0	0	4.4892e+07	0	0	1.71652e+07	0	0	1.51517e+08	0	0	1.35727e+08	0	0	6.13147e+07	0
Q6GYP7	1476	0.984505	18.4812	57.997	H	DPFMHLESLKEPEPLHSPDSERSSKLQPVTE	YFPISLSDLASVDYDPFMH(0.001)LESLK(0.001)EPEPLH(0.985)SPDSER(0.014)	1.39904e+08	0	0	7.12373e+07	0	0	7.00916e+07	0	0	1.03383e+08	0	0	6.1708e+07	0	0	9.98136e+07	0	0	0	0	0	115044055	0	0	0	0	0	1.36717e+08	0	0	1.80927e+08	0	0	9.20533e+07	0	0
Q6I6G8	461	0.525874	0.449932	50.479	H	LRSSFPTDTRLNAMLHIDSDEEDHEFQQDLG	LNAMLH(0.526)IDSDEEDH(0.474)EFQQDLGYPSSLEEEGGLIMCSR	0	0	0	0	0	0	0	0	0	9.27964e+06	0	0	1.43587e+07	0	0	0	0	0	0	0	0	0	0	0	0	0	0	0	0	0	0	0	0	0	0	0
Q6NS52	772	0.686386	6.41203	69.259	H	DGEPWMQTPCTIKITHKNQAPMLMGPPPKTG	SLPMQIDGEPWMQTPCTIK(0.157)ITH(0.686)K(0.157)	0	0	0	0	0	0	2.85053e+07	0	0	0	0	0	0	0	0	0	0	0	0	0	0	0	0	0	7.9736e+06	0	0	7.53927e+06	0	0	0	0	0	0	0	0
Q6NSW3	733	0.998813	29.3998	84.66	H	CFTFKKMNHIVTLSEHPSFDQAAGQAWVKAF	MNHIVTLSEH(0.999)PSFDQAAGQAWVK(0.001)	0	0	0	0	0	0	4.40561e+06	0	0	0	0	0	0	0	0	0	0	0	0	0	0	0	0	0	0	0	0	0	0	0	0	0	0	7.13682e+06	0	0
Q6NSW3	1202	0.956168	13.3874	120.99	H	IAKESKDGASSRRSSHDWTTGLLSPSTRSPL	R(0.044)SSH(0.956)DWTTGLLSPSTR	0	0	0	1.25001e+07	0	0	1.35416e+07	0	0	1.48699e+07	0	0	1.38601e+07	0	0	0	0	0	0	0	0	0	0	0	1.88707e+07	0	0	2.76715e+07	0	0	0	0	0	1.77474e+07	0	0
Q6NVE8	18	0.863301	8.00395	51.052	H	SESDTEEFYDAPEDVHLGTGYPVGSPGKVGL	ASESDTEEFYDAPEDVH(0.863)LGTGYPVGSPGK(0.137)	0	0	0	0	0	0	0	0	0	0	0	0	0	0	0	0	0	0	0	0	0	0	0	0	0	0	0	0	0	0	0	0	0	2.41583e+07	0	0
Q6NZM9	477	0.999527	33.3354	79.586	H	RTQSAPLPQNAQALQHLVIQQQHQQFLEKHK	TQSAPLPQNAQALQH(1)LVIQQQHQQFLEK	1.3915e+08	0	0	1.56644e+08	0	0	241491233	0	0	6.74233e+07	0	0	147454666	0	0	3.4512e+07	0	0	1.61526e+07	0	0	7.04955e+07	0	0	3.63071e+07	0	0	1.02756e+08	0	0	4.13066e+07	0	0	1.11098e+08	0	0
Q6P1I6	744	0.755252	4.89374	131.9	H	RLATIEGDDPALRKTHSSPALSLGHGPVTGS	K(0.245)TH(0.755)SSPALSLGHGPVTGSK	0	0	0	5.85706e+07	0	0	2.52879e+07	0	0	1.84348e+07	0	0	0	0	0	6.79937e+07	0	0	0	0	0	0	0	0	2.39593e+07	0	0	8.699e+07	0	0	8.04056e+06	0	0	5.27927e+07	0	0
Q6P4S6	1130	0.440709	0	86.195	H	RAQDCISQGPSPTPTHGYAHQPPLMHSESME	AQDCISQGPSPTPTH(0.441)GYAH(0.087)QPPLMH(0.441)SESMEEDCLCEGLK(0.031)	0	0	0	0	0	0	0	0	0	0	0	0	0	0	0	0	0	0	0	0	0	0	0	0	0	0	0	0	0	0	0	0	0	0	0	0
Q6P4S6	1140	0.950885	14.079	95.551	H	SPTPTHGYAHQPPLMHSESMEEDCLCEGLKE	AQDCISQGPSPTPTH(0.009)GYAH(0.037)QPPLMH(0.951)SESMEEDCLCEGLK(0.003)	1.91089e+07	0	0	1.1151e+07	0	0	1.84381e+07	0	0	1.71701e+07	0	0	0	0	0	2.97703e+07	0	0	0	0	0	1.77323e+07	0	0	2.32484e+07	0	0	0	0	0	0	0	0	3.28273e+07	0	0
Q6P5G6	239	0.938549	14.8496	86.324	H	DVSSFLDQVTGFLGEHGQLDGLSSSPPKKCA	LVEWHQLDVSSFLDQVTGFLGEH(0.939)GQLDGLSSSPPK(0.031)K(0.031)	0	0	0	1.60068e+07	0	0	9.80781e+06	0	0	0	0	0	0	0	0	2.54743e+07	0	0	0	0	0	0	0	0	5.35226e+07	0	0	2.5477e+07	0	0	0	0	0	1.18605e+07	0	0
Q6P9K8	1266	1	63.8422	144.74	H	KVPLPGPGSPEVKRAHGTPPPVSPKPPPPPT	AH(1)GTPPPVSPKPPPPPTAPKPAK	1.34202e+08	0	0	1.92489e+08	0	0	1.56269e+08	0	0	221069617	0	0	1.64876e+08	0	0	2.27712e+08	0	0	145310839	0	0	1.35383e+08	0	0	1.07122e+08	0	0	9.72663e+07	0	0	1.88383e+08	0	0	1.69279e+08	0	0
Q6PAM0	108	0.999996	54.324	71.969	H	GSFNNWSTKIPLIKSHNDFVAILDLPEGEHQ	SH(1)NDFVAILDLPEGEHQYK	1.74108e+07	0	0	1.20123e+07	0	0	1.08341e+07	0	0	1.39658e+07	0	0	1.15754e+07	0	0	1.32128e+07	0	0	1.46559e+07	0	0	2.21588e+07	0	0	2.00335e+07	0	0	1.12485e+07	0	0	1.60096e+07	0	0	5.45664e+07	0	0
Q6PAR5	943	0.494082	0	70.083	H	PPAAATGATSLVAAPHSSSSSPSKDSSRGET	RPGNEELPPAAATGATSLVAAPH(0.494)SSSSSPSK(0.494)DSSR(0.012)	0	0	0	0	0	0	0	0	0	0	0	0	0	0	0	0	0	0	0	0	0	0	0	0	0	0	0	0	0	0	0	0	0	0	0	0
Q6PB44	1184	0.965059	15.8876	64	H	GAAAADLLSSSPESQHGGTQPPGGGQPLLQP	R(0.025)GAAAADLLSSSPESQH(0.965)GGTQPPGGGQPLLQPTK(0.01)	0	0	0	1.26324e+07	0	0	1.01424e+07	0	0	1.28909e+07	0	0	1.30482e+07	0	0	4.72392e+06	0	0	0	0	0	0	0	0	0	0	0	0	0	0	1.16728e+07	0	0	0	0	0
Q6PCN3	641	0.999556	35.3218	87.352	H	GRSETSQPPTPGSPSHSPLHSGPRPRRRESD	SETSQPPTPGSPSH(1)SPLHSGPRPR	3.89915e+07	0	0	4.42188e+07	0	0	2.51612e+07	0	0	2.6199e+07	0	0	2.2365e+07	0	0	2.31169e+07	0	0	2.61227e+07	0	0	2.35159e+07	0	0	3.66045e+07	0	0	5.1498e+07	0	0	4.03004e+07	0	0	2.57169e+07	0	0
Q6PFD9	616	0.999999	60.4334	92.412	H	VLKNLNNSNLFSPVNHDSEDLASPSEYPENG	NLNNSNLFSPVNH(1)DSEDLASPSEYPENGER	9.25312e+06	0	0	1.23258e+07	0	0	1.17112e+07	0	0	0	0	0	9.80882e+06	0	0	1.10673e+07	0	0	0	0	0	9.84968e+06	0	0	0	0	0	0	0	0	8.78608e+06	0	0	1.55922e+07	0	0
Q6PFR5	199	1	73.0539	103.55	H	DGRRIRVDYSITKRAHTPTPGIYMGRPTHSG	AH(1)TPTPGIYMGR	0	0	0	5.29656e+07	0	0	4.64798e+07	0	0	2.24281e+07	0	0	2.86064e+07	0	0	43843518	0	0	4.61083e+07	0	0	4.20727e+07	0	0	3.65601e+07	0	0	2.69499e+07	0	0	1.32569e+08	0	0	1.13389e+07	0	0
Q6PFR5	212	0.914651	11.3904	72.152	H	RAHTPTPGIYMGRPTHSGGGGGGGGGGGGGG	AH(0.019)TPTPGIYMGR(0.066)PTH(0.915)SGGGGGGGGGGGGGGGGGGGR	4.6404e+06	0	0	7.71629e+06	0	0	7.84997e+06	0	0	2.92075e+06	0	0	6.57479e+06	0	0	5.81156e+06	0	0	0	0	0	0	0	0	4.1878e+06	0	0	0	0	0	0	0	0	0	0	0
Q6PFX9	384	0.999395	33.7201	71.545	H	AAGYNRVRIVQLLLQHGADVHAKDKGGLVPL	VR(0.001)IVQLLLQH(0.999)GADVH(0.282)AK(0.859)DK(0.859)	0	0	0	0	0	0	0	0	0	0	0	0	0	0	0	0	0	1.07775e+08	0	0	8.57954e+07	0	0	2.01742e+07	0	0	132778780	0	0	5.5421e+07	0	0	1.19782e+07	0	0	0
Q6PHU5	788	0.498897	0	71.426	H	VLIVKKYVCGGRFLVHRYSVLQQHAEADGVE	FLVH(0.499)R(0.499)YSVLQQH(0.002)AEADGVEALDSTSHAK	0	0	0	0	0	0	0	0	0	0	0	0	0	0	0	0	0	0	0	0	0	0	0	0	0	0	0	0	0	0	0	0	0	0	0	0
Q6PHU5	796	0.990533	20.202	70.15	H	CGGRFLVHRYSVLQQHAEADGVEALDSTSHA	YSVLQQH(0.991)AEADGVEALDSTSHAK(0.009)	0	0	0	0	0	0	0	0	0	0	0	0	0	0	0	0	0	0	1.11729e+07	0	0	1.58149e+07	0	0	2.08569e+07	0	0	0	0	0	0	0	0	0	0	0
Q6PIE5	491	0.747199	4.9457	90.422	H	AEIPFNSTNKYQLSIHEREDSPQSHVLVMKG	YQLSIH(0.747)ER(0.239)EDSPQSH(0.005)VLVMK(0.009)	0	0	0	0	0	0	4.94027e+07	0	0	6.816e+06	0	0	1.04918e+08	0	0	6.24236e+06	0	0	0	0	0	0	0	0	8.24077e+07	0	0	3.96224e+07	0	0	9.87121e+06	0	0	0	0	0
Q6PIE5	500	0.969968	15.1152	121.56	H	KYQLSIHEREDSPQSHVLVMKGAPERILDRC	YQLSIHEREDSPQSH(0.97)VLVMK(0.03)	0	0	0	7.81704e+06	0	0	0	0	0	1.79694e+07	0	0	9.24254e+06	0	0	0	0	0	0	0	0	0	0	0	0	0	0	1.9824e+07	0	0	1.87496e+07	0	0	7.73572e+06	0	0
Q6PNC0	655	0.980442	17.7367	103.88	H	DLACHSVLPLLLTTSHHNALRTPNVGNQKQA	FHLNDLACHSVLPLLLTTSH(0.98)H(0.017)NALRTPNVGNQK(0.003)	2.34407e+07	0	0	3.49561e+07	0	0	0	0	0	0	0	0	1.68131e+07	0	0	0	0	0	0	0	0	0	0	0	0	0	0	0	0	0	1.52805e+07	0	0	0	0	0
Q6PNC0	656	0.411929	0	68.211	H	LACHSVLPLLLTTSHHNALRTPNVGNQKQAH	FHLNDLACHSVLPLLLTTSH(0.139)H(0.412)NALR(0.412)TPNVGNQK(0.037)	0	0	0	0	0	0	0	0	0	0	0	0	0	0	0	0	0	0	0	0	0	0	0	0	0	0	0	0	0	0	0	0	0	0	0	0
Q6PNC0	1149	0.984799	18.1243	70.897	H	KHLVHLDWMSREDGSHILTVGIGSKLFMYGP	HLVHLDWMSREDGSH(0.985)ILTVGIGSK(0.015)	0	0	0	1.57298e+08	0	0	1.2461e+08	0	0	130960652	0	0	3.20661e+07	0	0	0	0	0	4.79148e+07	0	0	7.99972e+06	0	0	1.73577e+08	0	0	8.52003e+07	0	0	0	0	0	3.67764e+07	0	0
Q6PNC0	2541	0.999997	56.2696	106.11	H	RLEIHGGPPQNYISSHTSEENVSAGPAILRH	RLEIHGGPPQNYISSH(1)TSEENVSAGPAILR	0	0	0	0	0	0	1.39105e+07	0	0	1.25337e+07	0	0	1.69755e+07	0	0	2.48167e+07	0	0	0	0	0	0	0	0	4.01648e+07	0	0	0	0	0	1.84897e+07	0	0	2.12005e+07	0	0
Q6RHR9	614	0.955743	13.956	46.247	H	DARPSSPADVASNSSHGYPNDTVSLASSIAT	DAR(0.038)PSSPADVASNSSH(0.956)GYPNDTVSLASSIATQPELITVHIVK(0.006)	1.24182e+07	0	0	1.07036e+07	0	0	4.40025e+07	0	0	1.33931e+07	0	0	0	0	0	2.1628e+07	0	0	1.27955e+07	0	0	1.16402e+07	0	0	2.17497e+07	0	0	1.92665e+07	0	0	0	0	0	0	0	0
Q6VNS1	482	0.333332	0	61.776	H	PVAVISGEEDSASPLHHINHGITTPSSLDAG	GPVAVISGEEDSASPLH(0.333)H(0.333)INH(0.333)GITTPSSLDAGPDTVVIGMTR	0	0	0	0	0	0	0	0	0	0	0	0	0	0	0	0	0	0	0	0	0	0	0	0	0	0	0	0	0	0	0	0	0	0	0	0
Q6VNS1	483	0.341511	0	61.776	H	VAVISGEEDSASPLHHINHGITTPSSLDAGP	GPVAVISGEEDSASPLH(0.317)H(0.342)INH(0.342)GITTPSSLDAGPDTVVIGMTR	0	0	0	0	0	0	0	0	0	0	0	0	0	0	0	0	0	0	0	0	0	0	0	0	0	0	0	0	0	0	0	0	0	0	0	0
Q6VNS1	486	0.347525	0.274523	72.022	H	ISGEEDSASPLHHINHGITTPSSLDAGPDTV	GPVAVISGEEDSASPLH(0.326)H(0.326)INH(0.348)GITTPSSLDAGPDTVVIGMTR	0	0	0	0	0	0	0	0	0	0	0	0	0	0	0	0	0	0	0	0	0	0	0	0	0	0	0	0	0	0	0	0	0	0	0	0
Q6XP49	402	0.476457	0	144.12	H	PRRYKPFNARYKLLIHMRVHSGEKPNKCTFE	LLIH(0.476)MR(0.476)VH(0.045)SGEK(0.002)	0	0	0	0	0	0	0	0	0	0	0	0	0	0	0	0	0	0	0	0	0	0	0	0	0	0	0	0	0	0	0	0	0	0	0	0
Q6Y7W8	387	0.911971	10.1833	104.91	H	PQTSLSSARPGTPSDHQPQEATQFERKDEPK	AGAEASEEVPQTSLSSAR(0.087)PGTPSDH(0.912)QPQEATQFER(0.001)	0	0	0	1.01527e+07	0	0	7.29981e+06	0	0	0	0	0	8.53754e+06	0	0	7.95707e+06	0	0	0	0	0	0	0	0	0	0	0	0	0	0	0	0	0	0	0	0
Q6ZPF3	1597	0.660103	6.26601	71.297	H	LIKESDILSDEDEDFHHPLKQGSPTKDIEIQ	ESDILSDEDEDFH(0.66)H(0.156)PLK(0.156)QGSPTK(0.028)DIEIQFQR	0	0	0	0	0	0	0	0	0	0	0	0	0	0	0	0	0	0	0	0	0	0	0	0	0	0	0	1.09247e+07	0	0	0	0	0	0	0	0
Q6ZPF3	1598	0.331023	0	71.297	H	IKESDILSDEDEDFHHPLKQGSPTKDIEIQF	ESDILSDEDEDFH(0.331)H(0.331)PLK(0.331)QGSPTK(0.007)DIEIQFQR	0	0	0	0	0	0	0	0	0	0	0	0	0	0	0	0	0	0	0	0	0	0	0	0	0	0	0	0	0	0	0	0	0	0	0	0
Q6ZPR4	214	0.499994	0	55.417	H	RNLFIPVFLNCWLAKHALENMINDFHRAILR	NLFIPVFLNCWLAK(0.5)H(0.5)ALENMINDFHRAILR	0	0	0	0	0	0	4.30478e+06	0	0	1.37452e+07	0	0	2.3203e+07	0	0	2.38914e+07	0	0	3.97738e+07	0	0	2.99452e+07	0	0	1.29171e+07	0	0	0	0	0	0	0	0	2.96699e+07	0	0
Q6ZPZ3	166	0.94439	13.2785	89.043	H	SHRKYRDYSPPYAPSHQQYSSSHNAPLPKKS	YR(0.044)DYSPPYAPSH(0.944)QQYSSSHNAPLPK(0.011)	0	0	0	0	0	0	0	0	0	0	0	0	3.04432e+07	0	0	0	0	0	0	0	0	0	0	0	0	0	0	0	0	0	0	0	0	0	0	0
Q6ZWR6	7385	0.999992	51.0506	89.186	H	WMVEAEGILQGQDPTHSSDLSTIQERMEELK	SLEALEVWMVEAEGILQGQDPTH(1)SSDLSTIQER	0	0	0	8.08703e+06	0	0	1.18335e+07	0	0	4.27887e+06	0	0	5.27544e+06	0	0	0	0	0	1.79267e+07	0	0	4.85167e+06	0	0	0	0	0	5.29049e+06	0	0	7.97576e+06	0	0	0	0	0
Q71M36	470	1	75.4377	81.226	H	TKLRRTNKFRTPSELHNDNFSLSTIAEGSHP	TPSELH(1)NDNFSLSTIAEGSHPNVR	1.88827e+07	0	0	2.13341e+07	0	0	1.4702e+07	0	0	0	0	0	1.76593e+07	0	0	1.37864e+07	0	0	3.55561e+07	0	0	4.63719e+07	0	0	1.16026e+07	0	0	6.99101e+06	0	0	1.93834e+07	0	0	1.46883e+07	0	0
Q78ZA7	124	0.999462	33.3478	127.94	H	FITGDVEPTDAESAWHSENEEEDKLAGDMKN	EFITGDVEPTDAESAWH(0.999)SENEEEDKLAGDMK	2.9526e+07	0	0	3.11857e+07	0	0	3.37266e+07	0	0	2.32841e+07	0	0	5.13492e+07	0	0	6.21268e+07	0	0	0	0	0	0	0	0	0	0	0	5.21642e+07	0	0	0	0	0	4.56861e+07	0	0
Q7M6Y5	291	0.999216	31.0525	67.997	H	QSRDDLLRIIEMERLHLHRELLRMGEVQTAQ	IIEMER(0.001)LH(0.999)LH(1)R(1)ELLR(1)	0	0	4.43308e+07	0	0	8.82851e+07	0	0	3.97939e+07	0	0	4.34257e+07	0	0	1.78862e+07	0	0	3.0137e+07	0	0	3.96575e+07	0	0	4.21898e+07	0	0	7.80003e+07	0	0	0	0	0	5.22964e+07	0	0	3.61117e+07
Q7M6Y5	293	1	65.9265	67.997	H	RDDLLRIIEMERLHLHRELLRMGEVQTAQDN	IIEMER(0.001)LH(0.999)LH(1)R(1)ELLR(1)	0	0	4.43308e+07	0	0	8.82851e+07	0	0	3.97939e+07	0	0	4.34257e+07	0	0	1.78862e+07	0	0	3.0137e+07	0	0	3.96575e+07	0	0	4.21898e+07	0	0	7.80003e+07	0	0	0	0	0	5.22964e+07	0	0	3.61117e+07
Q7TMM9	37	0.976967	16.2812	75.956	H	EVISDEHGIDPTGSYHGDSDLQLERINVYYN	FWEVISDEH(0.023)GIDPTGSYH(0.977)GDSDLQLER	1.39689e+07	0	0	0	0	0	0	0	0	7.86975e+06	0	0	1.24705e+07	0	0	1.47617e+07	0	0	1.4543e+07	0	0	0	0	0	0	0	0	9.92406e+06	0	0	0	0	0	1.43021e+07	0	0
Q7TMM9	137	0.774792	5.60711	79.209	H	KESESCDCLQGFQLTHSLGGGTGSGMGTLLI	K(0.213)ESESCDCLQGFQLTH(0.775)SLGGGTGSGMGTLLISK(0.012)	0	0	0	0	0	0	1.36713e+07	0	0	1.76878e+07	0	0	1.70408e+07	0	0	0	0	0	1.55813e+07	0	0	0	0	0	0	0	0	0	0	0	0	0	0	2.19868e+07	0	0
Q7TQF7	279	0.999965	46.7997	59.991	H	PEEPSPLPSPTASPNHTLAPASPAPVRPRSP	TPSPPEEPSPLPSPTASPNH(1)TLAPASPAPVRPR	6.65343e+07	0	0	3.01198e+08	0	0	1134978239	0	0	9.12337e+08	0	0	2.59643e+08	0	0	1032182380	0	0	1667057778	0	0	1742326905	0	0	1217721336	0	0	1.7442e+08	0	0	4.29331e+07	0	0	1.18876e+07	0	0
Q7TQG1	534	0.887178	8.95618	93.115	H	PAGLFPYNYPSSPTVHDKMDELLDLQLQRNL	RPVPAGLFPYNYPSSPTVH(0.887)DK(0.113)	0	0	0	0	0	0	0	0	0	0	0	0	0	0	0	3.64067e+07	0	0	0	0	0	0	0	0	0	0	0	0	0	0	0	0	0	0	0	0
Q7TSJ2	898	1	46.22	93.093	H	PTVSPSPPVMIPTVPHTEYIEGSP_______	GTQLPTVSPSPPVMIPTVPH(1)TEYIEGSP	7.03879e+08	0	0	6.03609e+08	0	0	5.02121e+08	0	0	7.35219e+08	0	0	9.22132e+08	0	0	7.95257e+08	0	0	7.55659e+08	0	0	7.02182e+08	0	0	3.24945e+08	0	0	1269873357	0	0	1088186553	0	0	1163686336	0	0
Q7TT37	479	1	72.227	72.227	H	GAVGGNGFKVPLTTPHLEKRYSIQFGNNEEE	PNMDSTVK(1)LGAVGGNGFK(1)VPLTTPH(1)LEK(1)	0	0	0	0	0	0	0	0	0	0	0	0	0	0	0	0	0	0	0	0	0	0	0	0	0	0	0	0	0	0	0	0	0	0	0	0
Q7TT50	1697	0.861801	7.94903	199.84	H	SNSSNPSGPPSPNSPHRSQLPMEGLDQPSCD	HSTPSNSSNPSGPPSPNSPH(0.862)R(0.138)	2.02168e+07	0	0	2.19518e+07	0	0	2.18187e+07	0	0	1.80244e+07	0	0	2.24417e+07	0	0	1.69432e+07	0	0	1.6417e+07	0	0	1.62377e+07	0	0	1.00251e+07	0	0	1.88098e+07	0	0	1.83355e+07	0	0	1.31188e+07	0	0
Q80TE7	828	0.881202	11.7134	66.432	H	QERIVGVPLELEQSTHRHTPETEVPPSNPWQ	IVGVPLELEQSTH(0.881)R(0.059)H(0.059)TPETEVPPSNPWQNWTR	0	0	0	0	0	0	0	0	0	0	0	0	0	0	0	1.55102e+07	0	0	0	0	0	0	0	0	2.74692e+07	0	0	0	0	0	0	0	0	0	0	0
Q80TE7	830	0.454044	0	73.936	H	RIVGVPLELEQSTHRHTPETEVPPSNPWQNW	IVGVPLELEQSTH(0.092)R(0.454)H(0.454)TPETEVPPSNPWQNWTR	0	0	0	0	0	0	0	0	0	0	0	0	0	0	0	0	0	0	0	0	0	0	0	0	0	0	0	0	0	0	0	0	0	0	0	0
Q80TE7	974	0.980603	18.8393	62.167	H	KVYNIPLENYASGSDHLGSHERPDKFLGPEH	VYNIPLENYASGSDH(0.981)LGSH(0.013)ER(0.005)PDK(0.001)	2.22934e+07	0	0	1.45036e+07	0	0	1.61262e+07	0	0	0	0	0	1.20495e+07	0	0	0	0	0	0	0	0	1.05095e+07	0	0	2.36098e+07	0	0	0	0	0	0	0	0	2.75285e+07	0	0
Q80TL0	529	1	82.2568	243.4	H	DDKETHGECKRPWPQHQCSAPADLGYEGRVD	RPWPQH(1)QCSAPADLGYEGR	1.54006e+08	0	0	4.63156e+08	0	0	3.68084e+08	0	0	1.79866e+08	0	0	132783453	0	0	1.66055e+08	0	0	3.50029e+08	0	0	4.67493e+08	0	0	5.5468e+08	0	0	1.38222e+08	0	0	117912323	0	0	9.66424e+07	0	0
Q80TQ2	393	1	71.4506	87.339	H	EDPAKSLTEMSSDFGHSSPPPQPPSMNSLSS	SLTEMSSDFGH(1)SSPPPQPPSMNSLSSENR	6.99796e+06	0	0	2.16118e+07	0	0	0	0	0	0	0	0	8.02592e+06	0	0	4.51356e+06	0	0	0	0	0	0	0	0	0	0	0	0	0	0	0	0	0	0	0	0
Q80TY0	504	0.714809	4.31526	59.386	H	SEQARRQSGLYDGQTHQTVTNCAQDRESPDG	QSGLYDGQTH(0.715)QTVTNCAQDR(0.265)ESPDGSYTEEQSQESEHK(0.021)	0	0	0	0	0	0	0	0	0	2.08757e+07	0	0	0	0	0	0	0	0	0	0	0	0	0	0	0	0	0	0	0	0	0	0	0	0	0	0
Q80TZ3	470	0.986147	22.6707	60.95	H	CWQDQKSEKSRCEEDHAALVNQESEQSDDEL	CEEDH(0.986)AALVNQESEQSDDELLTLSSPH(0.003)GNAEGDK(0.005)PHGAK(0.005)	2.45949e+07	0	0	0	0	0	9.98593e+06	0	0	2.22787e+07	0	0	1.22004e+07	0	0	5.77149e+07	0	0	2.80943e+07	0	0	0	0	0	0	0	0	0	0	0	1.16445e+07	0	0	7.96479e+07	0	0
Q80TZ3	492	0.883607	10.4801	77.627	H	ESEQSDDELLTLSSPHGNAEGDKPHGAKKPG	SRCEEDHAALVNQESEQSDDELLTLSSPH(0.884)GNAEGDK(0.032)PH(0.005)GAK(0.079)	4.09291e+07	0	0	6.63441e+07	9.1195e+06	0	1.23566e+07	1.37764e+07	0	0	0	0	1.64378e+07	1.16513e+07	0	2.09464e+07	1.10743e+07	0	0	0	0	0	0	0	5.79662e+06	0	0	0	0	0	0	0	0	1.00326e+08	1.84339e+07	0
Q80TZ3	768	0.995356	23.3105	131.5	H	YNWQQTQSKPQSSMPHSSPQNRPNYNVSFSA	PQSSMPH(0.995)SSPQNR(0.005)PNYNVSFSAMPAGQSER	1.7871e+07	0	0	8.54685e+07	0	0	0	0	0	3.03537e+07	0	0	4.68263e+07	0	0	7.08817e+07	0	0	2.94718e+07	0	0	0	0	0	0	0	0	1.70244e+07	0	0	2.72512e+07	0	0	1.57833e+07	0	0
Q80TZ3	689	0.936294	11.918	98.355	H	GMGSKSAATSPTGSSHGTPTHQSKPQTLDPF	SAATSPTGSSH(0.936)GTPTH(0.06)QSK(0.003)PQTLDPFADLGTLGSSSFASK	3.67419e+07	0	0	3.97738e+07	0	0	0	0	0	2.42345e+07	0	0	2.91001e+07	0	0	3.1604e+07	0	0	1.38894e+07	0	0	1.06714e+07	0	0	8.09385e+06	0	0	1.60735e+07	0	0	6.04189e+07	0	0	4.77354e+06	0	0
Q80TZ3	694	0.437456	0	85.939	H	SAATSPTGSSHGTPTHQSKPQTLDPFADLGT	SAATSPTGSSH(0.124)GTPTH(0.437)QSK(0.437)PQTLDPFADLGTLGSSSFASK(0.001)	0	0	0	0	0	0	0	0	0	0	0	0	0	0	0	0	0	0	0	0	0	0	0	0	0	0	0	0	0	0	0	0	0	0	0	0
Q80TZ3	647	0.999938	43.9657	66.642	H	SDPFLQPTRSPSPTVHASSTPAVNIQPDIAG	SPSPTVH(1)ASSTPAVNIQPDIAGGWDWHTKPGGFGMGSK	1.29939e+07	0	0	9.33424e+07	0	0	3.65863e+07	0	0	3.3321e+07	0	0	3.03771e+07	0	0	2.42511e+07	0	0	2.53914e+07	0	0	1.59519e+07	0	0	2.45535e+07	0	0	2.43017e+07	0	0	1.01438e+08	0	0	1.72212e+07	0	0
Q80U16	758	1	72.8447	76.01	H	PLTTGNESLDITIVKHLQYCTQLIQQIVFSS	H(1)LQYCTQLIQQIVFSSK	1.25898e+07	0	0	1.5568e+07	0	0	1.2701e+07	0	0	1.62754e+07	0	0	1.36504e+07	0	0	2.16699e+07	0	0	0	0	0	0	0	0	4.1173e+07	0	0	0	0	0	1.66687e+07	0	0	0	0	0
Q80U40	850	0.815808	6.4839	82.946	H	RPAMAPSIDEYTGRDHLSPDFYDESETDPGA	HRPAMAPSIDEYTGR(0.183)DH(0.816)LSPDFYDESETDPGAEELPAR	1.36555e+07	0	0	1.18411e+07	0	0	1.03496e+07	0	0	0	0	0	0	0	0	6.17081e+06	0	0	2.36956e+07	0	0	2.30909e+07	0	0	0	0	0	1.35957e+07	0	0	0	0	0	0	0	0
Q80U87	658	0.772332	5.30956	51.568	H	PEMAPSSAPPSTPPTHKVKPQVPAERDREPS	YYHSPTNTVHMYPPEMAPSSAPPSTPPTH(0.772)K(0.227)	5.51713e+06	0	0	0	0	0	0	0	0	0	0	0	0	0	0	0	0	0	0	0	0	0	0	0	0	0	0	0	0	0	0	0	0	0	0	0
Q80U95	124	1	65.2413	70.728	H	EDSKRLIWLYQNLIKHSSLFVKQLDGSERLT	R(1)LIWLYQNLIK(1)H(1)SSLFVK(1)	0	0	0	0	0	0	0	0	0	0	0	9.9957e+06	0	0	8.24868e+06	0	0	1.07575e+07	0	0	0	0	0	3.27334e+06	0	0	6.43753e+06	0	0	0	0	0	0	0	0	7.51447e+06
Q80UW2	113	0.468723	0	71.857	H	QEGLVPEGSADEERDHWQQFYFLSKRRRNLL	CQQEGLVPEGSADEER(0.469)DH(0.469)WQQFYFLSK(0.063)	0	0	0	0	0	0	0	0	0	0	0	0	0	0	0	0	0	0	0	0	0	0	0	0	0	0	0	0	0	0	0	0	0	0	0	0
Q80UY2	287	0.999247	31.2767	82.992	H	ATANTANTENSPQALHNSQFLLTRLNDPKMS	RTNTSSVTTTITQATATANTANTENSPQALH(0.999)NSQFLLTR(0.001)	0	0	0	0	0	0	0	0	0	0	0	0	5.94559e+06	0	0	9.58414e+06	0	0	0	0	0	0	0	0	0	0	0	7.95047e+06	0	0	0	0	0	0	0	0
Q80X80	406	0.999573	33.6915	132.06	H	PGKSLSPAATVTAELHYEQGSPRNLGTPTSS	SLSPAATVTAELH(1)YEQGSPR	0	0	0	2.31516e+07	0	0	0	0	0	8.53515e+06	0	0	0	0	0	6.11055e+06	0	0	2.72183e+07	0	0	2.91552e+07	0	0	5.59224e+06	0	0	0	0	0	1.83907e+07	0	0	1.38997e+07	0	0
Q80XU8	610	0.999899	39.9582	114.51	H	YGYARRLGGAWARRSHSVHGGLLGAGCRGVG	SH(1)SVHGGLLGAGCR	1.63147e+07	0	0	2.48462e+07	0	0	1.19512e+07	0	0	2.54924e+07	0	0	1.65414e+07	0	0	2.0192e+07	0	0	1.59376e+07	0	0	8.51526e+06	0	0	0	0	0	1.18231e+07	0	0	1.07769e+07	0	0	0	0	0
Q80XU8	613	0.993015	21.5296	96.665	H	ARRLGGAWARRSHSVHGGLLGAGCRGVGGSA	SH(0.007)SVH(0.993)GGLLGAGCR	3.53912e+07	0	0	3.76606e+07	0	0	3.94153e+07	0	0	0	0	0	0	0	0	4.64397e+07	0	0	3.32526e+07	0	0	3.35942e+07	0	0	3.38623e+07	0	0	2.65451e+07	0	0	3.29338e+07	0	0	3.51435e+07	0	0
Q80Y61	422	0.997235	25.5704	85.777	H	PMNELPSRSYPLRGSHSLDDLLDRPGNPTAS	GSH(0.997)SLDDLLDR(0.003)PGNPTASSEYWDSQSR	1.57923e+07	0	0	1.42289e+07	0	0	1.27584e+07	0	0	0	0	0	0	0	0	0	0	0	2.66345e+07	0	0	0	0	0	0	0	0	0	0	0	0	0	0	0	0	0
Q80YA9	782	1	73.479	128.6	H	SWQDLIETPLTSSGLHYLQTLPLEDSVFSDS	SWQDLIETPLTSSGLH(1)YLQTLPLEDSVFSDSAAISPEHR	0	0	0	6.77726e+06	0	0	0	0	0	0	0	0	0	0	0	0	0	0	1.00915e+07	0	0	0	0	0	0	0	0	0	0	0	0	0	0	0	0	0
Q80YA9	804	0.618873	4.81665	52.577	H	LEDSVFSDSAAISPEHRRQSTLPTQKCHLQD	R(0.002)SWQDLIETPLTSSGLH(0.204)YLQTLPLEDSVFSDSAAISPEH(0.619)R(0.175)	2.9553e+07	0	0	1.00236e+07	0	0	9.10949e+06	0	0	0	0	0	6.29655e+06	0	0	4.20178e+06	0	0	0	0	0	1.95137e+07	0	0	0	0	0	0	0	0	1.09571e+07	0	0	0	0	0
Q80YA9	508	1	97.3976	112.02	H	GKKSKKKGDKSNSPAHYSLLPSLQMDALRQD	SNSPAH(1)YSLLPSLQMDALR	1.87581e+07	0	0	2.09054e+07	0	0	0	0	0	5.40997e+06	0	0	0	0	0	3.22556e+06	0	0	5.89481e+07	0	0	6.96184e+07	0	0	3.57592e+07	0	0	7.96041e+06	0	0	0	0	0	0	0	0
Q811D0	149	0.917238	12.3606	151.3	H	LVHVSEKNLSEIENVHGFVSHSHISPIKPTE	NLSEIENVH(0.917)GFVSH(0.053)SH(0.003)ISPIK(0.026)	0	0	0	0	0	0	0	0	0	0	0	0	0	0	0	0	0	0	2.81884e+08	0	0	0	0	0	0	0	0	0	0	0	0	0	0	0	0	0
Q811D0	154	0.644397	4.91718	64.26	H	EKNLSEIENVHGFVSHSHISPIKPTEAVPPS	NLSEIENVH(0.006)GFVSH(0.644)SH(0.208)ISPIK(0.142)	2.36587e+07	0	0	2.16959e+08	0	0	1.462e+08	0	0	1.08775e+08	0	0	1.15183e+08	0	0	1.16599e+08	0	0	2.68415e+08	0	0	2.19607e+07	0	0	2.4079e+08	0	0	1.14921e+08	0	0	2.18963e+07	0	0	1.27017e+08	0	0
Q811P8	1250	0.852009	7.6021	80.711	H	DKSPMPSTLPRDKAHHPLSGSPEENSSTATM	AH(0.148)H(0.852)PLSGSPEENSSTATMAYMMATPAR	1.43253e+07	0	0	9.7645e+06	0	0	1.0284e+07	0	0	0	0	0	0	0	0	0	0	0	0	0	0	0	0	0	0	0	0	0	0	0	0	0	0	0	0	0
Q812A2	897	0.706457	3.81414	150.09	H	SIDTPPRAAACPSSPHKIPLSRGRIESPEKR	AAACPSSPH(0.706)K(0.294)IPLSR	0	0	0	0	0	0	4.67071e+06	0	0	0	0	0	4.15143e+06	0	0	0	0	0	0	0	0	0	0	0	0	0	0	0	0	0	0	0	0	0	0	0
Q812A2	841	1	103.12	115.78	H	DDKASSKNDLQSPTEHISDYGFGGVMGRVRL	NDLQSPTEH(1)ISDYGFGGVMGR	2.0587e+07	0	0	2.67104e+07	0	0	1.96752e+07	0	0	2.08852e+07	0	0	2.36983e+07	0	0	1.46428e+07	0	0	3.44742e+07	0	0	3.26729e+07	0	0	2.59438e+07	0	0	1.51162e+07	0	0	3.27633e+07	0	0	2.51094e+07	0	0
Q8BG18	190	1	78.4807	82.126	H	SIQWPGKRSSRRVQRHNSFSPNSPQFNVSSP	H(1)NSFSPNSPQFNVSSPALLEEDNQWMTQINR	0	0	0	0	0	0	0	0	0	0	0	0	0	0	0	0	0	0	2.0191e+07	0	0	0	0	0	0	0	0	0	0	0	0	0	0	0	0	0
Q8BG89	12	1	150.697	194.5	H	____MQQTTFEESRYHWQDSLENVAVCLPFR	YH(1)WQDSLENVAVCLPFR	2.32387e+07	0	0	0	0	0	1.95061e+07	0	0	0	0	0	1.08321e+07	0	0	1.70172e+07	0	0	4.50565e+07	0	0	0	0	0	0	0	0	0	0	0	1.53125e+07	0	0	0	0	0
Q8BH65	126	0.597033	1.70799	73.918	H	FCFRFRQSSGRRVSLHCLLDEFDKDLPVYLK	R(0.403)VSLH(0.597)CLLDEFDKDLPVYLK	0	0	0	2.36643e+06	0	0	1.5261e+06	0	0	1.57637e+06	0	0	0	0	0	0	0	0	5.44365e+06	0	0	0	0	0	0	0	0	0	0	0	0	0	0	0	0	0
Q8BH65	361	0.999992	51.2408	78.342	H	VILGVTNPFFAKTLQHWPHIIRIGDLKPAGE	TLQH(1)WPH(1)IIR(1)IGDLK	0	0	3.86711e+07	0	0	1.59811e+07	0	0	2.82884e+07	0	0	105683778	0	0	4.69063e+07	0	0	1.24433e+08	0	0	4.17993e+07	0	0	5.85378e+06	0	0	2.36216e+07	0	0	109367763	0	0	1.3572e+07	0	0	2.80811e+07
Q8BH65	364	0.999992	51.2408	78.342	H	GVTNPFFAKTLQHWPHIIRIGDLKPAGEIPK	TLQH(1)WPH(1)IIR(1)IGDLK	0	0	3.86711e+07	0	0	1.59811e+07	0	0	2.82884e+07	0	0	105683778	0	0	4.69063e+07	0	0	1.24433e+08	0	0	4.17993e+07	0	0	5.85378e+06	0	0	2.36216e+07	0	0	109367763	0	0	1.3572e+07	0	0	2.80811e+07
Q8BHE3	57	0.844025	7.333	77.644	H	EDSSSPPSTLNLSGAHRKRKTLVAPEINISL	LGGAVEDSSSPPSTLNLSGAH(0.844)R(0.156)	1.52948e+07	0	0	1.65693e+07	0	0	1.49957e+07	0	0	1.24229e+07	0	0	0	0	0	1.297e+07	0	0	0	0	0	2.03898e+07	0	0	1.81047e+07	0	0	1.81153e+07	0	0	2.97968e+07	0	0	0	0	0
Q8BHZ0	17	0.925457	7.93246	59.228	H	GNLLKVLTREIENYPHFFLDFENAQPTEGER	MGNLLK(0.537)VLTR(0.537)EIENYPH(0.925)FFLDFENAQPTEGER	0	0	0	0	0	0	0	0	0	0	0	0	0	0	0	0	0	0	0	0	0	0	0	0	0	0	0	0	0	0	0	0	0	0	0	0
Q8BIZ1	967	1	65.7399	72.878	H	QKPPRSITLREPSGNHTPPQLSPSLSQSTYT	EPSGNH(1)TPPQLSPSLSQSTYTTGGSLDVPHIIMQGDAR	2.63581e+07	0	0	0	0	0	3.74866e+07	0	0	0	0	0	1.10091e+07	0	0	1.03398e+07	0	0	2.18692e+07	0	0	1.30533e+07	0	0	2.61298e+07	0	0	0	0	0	1.96039e+07	0	0	8.26661e+06	0	0
Q8BJ42	810	0.931689	11.3478	150.34	H	SMEDKGLQFGSSFQRHSEPSTPTQYGALRTV	GLQFGSSFQR(0.068)H(0.932)SEPSTPTQYGALR	1.28625e+07	0	0	2.70885e+07	0	0	3.84338e+07	0	0	0	0	0	0	0	0	7.85204e+06	0	0	7.56737e+07	0	0	3.81713e+07	0	0	4.66544e+07	0	0	0	0	0	1.27721e+07	0	0	0	0	0
Q8BJI1	12	0.837334	7.19771	60.464	H	____MPKNSKVTQREHSNEHVTESVADLLAL	EH(0.837)SNEH(0.16)VTESVADLLALEEPVDYK(0.003)	1.10474e+07	0	0	0	0	0	0	0	0	0	0	0	2.73107e+07	0	0	1.06336e+07	0	0	0	0	0	0	0	0	0	0	0	0	0	0	1.69942e+07	0	0	8.66593e+06	0	0
Q8BJI1	16	0.998358	27.934	144.15	H	MPKNSKVTQREHSNEHVTESVADLLALEEPV	EH(0.002)SNEH(0.998)VTESVADLLALEEPVDYK	1.07326e+08	0	0	146669741	0	0	1.04569e+08	0	0	8.96453e+07	0	0	7.18563e+07	0	0	1.16699e+08	0	0	1.38803e+08	0	0	108021099	0	0	1.19604e+08	0	0	5.00329e+07	0	0	115134323	0	0	6.91549e+07	0	0
Q8BK03	136	0.945982	12.4334	111.97	H	SGISSIEPSKHSGSSHSLASMVVVNSSSPTA	H(0.054)SGSSH(0.946)SLASMVVVNSSSPTAACSGSWEAR	0	0	0	0	0	0	0	0	0	0	0	0	4.84191e+06	0	0	0	0	0	0	0	0	0	0	0	0	0	0	0	0	0	0	0	0	3.4988e+06	0	0
Q8BML1	897	0.660194	4.84057	56.099	H	DLPQDKLLSKRVPHAHPPSPPSCLPSPHPAA	R(0.016)VPH(0.108)AH(0.66)PPSPPSCLPSPH(0.217)PAAASSPPAADSVSPAR	0	0	0	5.5148e+06	0	0	0	0	0	0	0	0	0	0	0	0	0	0	0	0	0	0	0	0	0	0	0	0	0	0	0	0	0	0	0	0
Q8BN59	216	0.99979	39.5868	91.658	H	ATPQKNGRVQEKVMEHLLKLFGTFGVISSVR	NGR(0.867)VQEK(0.133)VMEH(1)LLK	0	0	0	0	1.66136e+07	0	0	0	0	0	1.69726e+07	0	0	0	0	0	1.27721e+07	0	0	0	0	0	0	0	0	0	0	0	9.82321e+06	0	0	1.27192e+07	0	0	3.73684e+06	0
Q8BPN8	669	0.499499	0	142.71	H	DLACHSVLPLLLTSSHHNALLTPESDCQWDS	FHLNDLACH(0.001)SVLPLLLTSSH(0.499)H(0.499)NALLTPESDCQWDSDSK	0	0	0	0	0	0	0	0	0	0	0	0	0	0	0	0	0	0	0	0	0	0	0	0	0	0	0	0	0	0	0	0	0	0	0	0
Q8BPN8	670	0.8067	6.28067	142.71	H	LACHSVLPLLLTSSHHNALLTPESDCQWDSD	FHLNDLACHSVLPLLLTSSH(0.19)H(0.807)NALLTPESDCQWDSDSK(0.003)	0	0	0	0	0	0	0	0	0	3.1226e+07	0	0	0	0	0	0	0	0	9.54347e+07	0	0	7.75751e+07	0	0	0	0	0	0	0	0	0	0	0	0	0	0
Q8BPN8	2304	0.999991	50.2368	81.732	H	LLSDRRRLRTESIEEHATPNSAPAQWPGVSS	TESIEEH(1)ATPNSAPAQWPGVSSLINLLSSAQDEDQPK	5.76784e+06	0	0	8.24264e+06	0	0	5.75165e+06	0	0	0	0	0	4.86467e+06	0	0	7.14633e+06	0	0	0	0	0	0	0	0	0	0	0	0	0	0	7.35031e+06	0	0	0	0	0
Q8BTI8	1277	0.999061	30.2688	128.82	H	CWSGPQVSPEHKELSHSPPRENSFESSLEFK	ELSH(0.999)SPPR(0.001)ENSFESSLEFK	0	0	0	6.26912e+06	0	0	5.64851e+07	0	0	3.1184e+07	0	0	4.99874e+07	0	0	4.5971e+07	0	0	6.86896e+07	0	0	7.22668e+07	0	0	0	0	0	0	0	0	6.73654e+06	0	0	6.76179e+07	0	0
Q8BTI8	302	0.999999	60.6648	78.445	H	HTTALTGQSPPLASGHQGEGDAPSVEPGATN	IHTTALTGQSPPLASGH(1)QGEGDAPSVEPGATNIQQPSSPAPSTK(1)	0	1.60345e+07	0	0	2.15224e+07	0	0	1.43204e+07	0	0	0	0	0	1.23832e+07	0	0	1.60818e+07	0	0	3.65898e+07	0	0	3.75176e+07	0	0	0	0	0	0	0	0	1.92151e+07	0	0	1.9296e+07	0
Q8BTI8	1002	0.996883	25.0504	108.3	H	PQKSRDSPTGSSGSFHLCPGVTPSSIVPGES	SR(0.003)DSPTGSSGSFH(0.997)LCPGVTPSSIVPGESCFSASFVQQK	3.76671e+07	0	0	2.63182e+07	0	0	9.50076e+07	0	0	1.10707e+08	0	0	1.17247e+07	0	0	101499433	0	0	0	0	0	1.26945e+08	0	0	151302883	0	0	3.52249e+07	0	0	5.73862e+07	0	0	9.31444e+07	0	0
Q8BTM8	2159	0.643524	3.55311	45.017	H	ITRRRRAPSVANIGSHCDLSLKIPEISIQDM	R(0.068)APSVANIGSH(0.644)CDLSLK(0.284)IPEISIQDMTAQVTSPSGK(0.004)	0	0	0	2.39864e+07	0	0	1.02244e+07	0	0	1.86726e+07	0	0	9.11117e+06	0	0	2.04528e+07	0	0	0	0	0	0	0	0	3.16e+07	0	0	0	0	0	0	0	0	0	0	0
Q8BUV3	202	0.950053	12.686	82.964	H	PSPPPPLSPPPTTSPHKQTEDKGVQCEEEEE	VK(0.14)EVH(0.016)DELEDLPSPPPPLSPPPTTSPH(0.95)K(0.95)QTEDK(0.944)	0	0	1.65417e+07	0	0	1.81503e+07	0	0	2.26459e+07	0	0	2.0838e+07	0	0	1.86809e+07	0	0	1.47348e+07	0	0	4.29992e+07	0	0	1.30731e+07	0	0	3.77259e+07	0	0	3.76658e+07	0	0	0	1.72877e+07	0	2.13769e+07
Q8BVI5	31	0.999999	61.8231	147.33	H	NSIQTRQLLAEQVSSHTTSSPLHSRSIAAEL	QLLAEQVSSH(1)TTSSPLHSR	5.94318e+07	0	0	9.46339e+07	0	0	0	0	0	0	0	0	0	0	0	0	0	0	0	0	0	7.15821e+07	0	0	2.93998e+06	0	0	4.04348e+07	0	0	7.0203e+07	0	0	5.92368e+07	0	0
Q8BX17	1080	0.994694	22.706	51.125	H	ASLRTAAELAAIAGEHELAASLALRCAQELL	GDAASLR(0.011)TAAELAAIAGEH(0.995)ELAASLALR(0.995)CAQELLLMK(1)	0	0	8.366e+07	0	0	1.09689e+08	0	0	1.68961e+07	0	0	0	0	0	3.97469e+07	0	0	0	0	0	137589144	0	0	2.03541e+08	0	0	1.22915e+08	0	0	2.7141e+07	0	0	6.30978e+07	0	0	0
Q8BZM1	252	1	65.0897	87.719	H	RCFASEIIGFLSKIGHPVPQIILNHGRKKRT	IGH(1)PVPQIILNH(0.494)GR(0.494)K(0.013)	0	1.35856e+07	0	0	2.3059e+07	0	0	0	0	0	0	0	0	0	0	0	0	0	0	0	0	0	0	0	0	8.00736e+06	0	0	0	0	0	1.76571e+07	0	0	0	0
Q8BZM1	261	0.529234	1.80146	87.719	H	FLSKIGHPVPQIILNHGRKKRTWDYLEFEEE	IGH(1)PVPQIILNH(0.529)GR(0.35)K(0.121)	0	0	0	0	0	0	0	0	0	0	0	0	0	0	0	0	0	0	0	0	0	0	0	0	0	0	0	0	0	0	0	1.76571e+07	0	0	0	0
Q8C052	662	1	74.8758	86.727	H	GLSLPLRLARRSTSPHDVDLCLVSPCEFSHR	STSPH(1)DVDLCLVSPCEFSHR	0	0	0	6.05095e+06	0	0	0	0	0	6.75444e+06	0	0	5.69999e+06	0	0	7.87303e+06	0	0	6.68173e+06	0	0	0	0	0	1.24876e+07	0	0	1.34274e+07	0	0	0	0	0	9.73776e+06	0	0
Q8C0T5	1428	0.809001	6.26919	100.86	H	PVVFSSARSSPKEELHPTASSQLAPSFSSSS	SSPK(0.191)EELH(0.809)PTASSQLAPSFSSSSSSSSGPR	1.16723e+08	0	0	153314267	0	0	1.07387e+08	0	0	4.42749e+07	0	0	6.03152e+07	0	0	6.19629e+07	0	0	1.76198e+08	0	0	1.17562e+08	0	0	1.56972e+08	0	0	4.96636e+07	0	0	9.28284e+07	0	0	2.99028e+07	0	0
Q8C1S0	225	0.856635	8.36948	91.729	H	ERKRKKKEKKKKKNRHSPDHPGMGSSQASSS	NR(0.125)H(0.857)SPDH(0.019)PGMGSSQASSSSSLR	0	0	0	0	0	0	6.15649e+06	0	0	0	0	0	0	0	0	0	0	0	0	0	0	0	0	0	0	0	0	0	0	0	0	0	0	0	0	0
Q8C419	707	0.994337	25.1506	98.924	H	SGSYLNSSINSAWSEHSLDPEDIRDELKKLY	SGSYLNSSINSAWSEH(0.994)SLDPEDIRDELK(0.003)K(0.003)	9.4185e+07	0	0	9.41126e+07	0	0	108795143	0	0	7.44689e+07	0	0	6.89996e+07	0	0	93046310	0	0	1.59052e+08	0	0	2.31758e+08	0	0	1.27198e+08	0	0	6.2971e+07	0	0	5.47043e+07	0	0	6.88871e+07	0	0
Q8C4G9	233	0.847768	7.45799	130.98	H	TEEQQRLAVPESGHRHGVRPGTPPTCDALAA	H(0.848)GVR(0.152)PGTPPTCDALAASQLQNEHSFK	0	0	0	6.53194e+07	0	0	1.95336e+07	0	0	6.3357e+07	0	0	8.96347e+07	0	0	0	0	0	2.73454e+08	0	0	1.73044e+07	0	0	0	0	0	0	0	0	0	0	0	0	0	0
Q8C5H8	179	0.942074	12.1218	87.654	H	KPVIGVNTDPERSEGHLCLPVRYTHSFPEAL	LKPVIGVNTDPER(0.058)SEGH(0.942)LCLPVR	0	0	0	0	0	0	0	0	0	1.47883e+07	0	0	1.96748e+07	0	0	1.65015e+07	0	0	0	0	0	0	0	0	5.55107e+06	0	0	0	0	0	0	0	0	1.9484e+07	0	0
Q8C7W7	392	0.980515	14.5855	66.152	H	ENLSPWAGHLERLCPHPLQARKQLFPDFCRK	ENLSPWAGHLER(0.002)LCPH(0.981)PLQAR(0.508)K(0.508)	0	0	0	0	3.76061e+06	0	0	8.48346e+06	0	0	0	0	0	2.98948e+07	0	0	0	0	0	2.30204e+07	0	0	1.34427e+07	0	0	5.07698e+07	0	0	4.37819e+07	0	0	0	0	0	2.03005e+07	0
Q8C8R3	2735	0.999995	53.2282	125.61	H	GDLNRETTQPETCDGHGCETVSPSNSATPVS	ETTQPETCDGH(1)GCETVSPSNSATPVSLGVQSPEH(0.002)K(0.998)	0	5.82395e+06	0	2.13395e+07	0	0	1.62254e+07	5.66245e+06	0	1.49463e+07	0	0	3.7361e+07	7.24275e+06	0	0	1.59369e+07	0	1.20807e+07	6.53252e+06	0	0	0	0	1.96165e+07	0	0	5.31854e+07	0	0	0	0	0	1.76553e+07	1.06215e+07	0
Q8C8R3	1838	0.91202	10.4118	188.1	H	KTERHSPVFSGKPEKHSPGSPSTKNERHSPV	HSPVFSGKPEK(0.083)H(0.912)SPGSPSTK(0.005)	3.65661e+06	0	0	3.33961e+06	0	0	7.25577e+07	0	0	1.44835e+08	0	0	1.09463e+08	0	0	8.7718e+06	0	0	6.75492e+07	0	0	1.04014e+08	0	0	1.09231e+08	0	0	4.88561e+06	0	0	1.21711e+07	0	0	1.13614e+08	0	0
Q8C8R3	3696	0.858853	7.84247	76.21	H	KTEGDSPAAALSPQMHQEPVQQDFSGKTQDQ	TEGDSPAAALSPQMH(0.859)QEPVQQDFSGK(0.141)	1.29296e+07	0	0	9.1405e+06	0	0	0	0	0	0	0	0	0	0	0	0	0	0	0	0	0	0	0	0	0	0	0	0	0	0	0	0	0	0	0	0
Q8CCN5	704	0.986157	18.5277	95.646	H	LAGSLPPGSPGPITRHGSYDSLASDHSGQED	H(0.986)GSYDSLASDH(0.014)SGQEDEEWLSQVEIVTHTGPHR	4.51979e+07	0	0	1.56699e+07	0	0	5.36747e+06	0	0	1.50571e+07	0	0	1.77899e+07	0	0	3.29171e+07	0	0	2.50618e+07	0	0	2.20971e+07	0	0	1.02128e+07	0	0	5.03717e+07	0	0	0	0	0	3.45128e+07	0	0
Q8CCN5	714	0.984024	17.8954	103.64	H	GPITRHGSYDSLASDHSGQEDEEWLSQVEIV	H(0.016)GSYDSLASDH(0.984)SGQEDEEWLSQVEIVTHTGPHR	0	0	0	0	0	0	4.99058e+06	0	0	6.16141e+06	0	0	0	0	0	1.73829e+07	0	0	0	0	0	2.73358e+07	0	0	1.57114e+07	0	0	0	0	0	9.61128e+06	0	0	0	0	0
Q8CGB6	462	0.979336	16.7574	79.029	H	TEPAVRWDSYENFNQHHEDSVDGALAHTRGP	WDSYENFNQH(0.979)H(0.021)EDSVDGALAHTR	2.53651e+07	0	0	2.12967e+07	0	0	2.08148e+07	0	0	2.81514e+07	0	0	2.59374e+07	0	0	2.55652e+07	0	0	4.25221e+07	0	0	2.38662e+07	0	0	3.53054e+07	0	0	2.56751e+07	0	0	3.37255e+07	0	0	2.4159e+07	0	0
Q8CGF6	343	0.903675	9.76761	90.712	H	DKRISDLGNKTSPMSHSFANFHYPGVQNLSR	ISDLGNK(0.095)TSPMSH(0.904)SFANFH(0.001)YPGVQNLSR	7.1675e+06	0	0	1.28246e+07	0	0	1.59705e+07	0	0	1.71306e+07	0	0	1.01213e+07	0	0	0	0	0	0	0	0	0	0	0	0	0	0	1.63576e+07	0	0	1.9236e+07	0	0	0	0	0
Q8CH02	477	0.550104	0.873325	103.03	H	AMQDMQLLWEKALQQHQHGYDSDEEVDSELG	ALQQH(0.55)QH(0.45)GYDSDEEVDSELGTWEHQLR	2.75905e+07	0	0	0	0	0	2.78561e+07	0	0	0	0	0	0	0	0	2.02249e+07	0	0	0	0	0	0	0	0	0	0	0	2.95811e+07	0	0	0	0	0	0	0	0
Q8CH02	479	0.951418	12.9189	128.88	H	QDMQLLWEKALQQHQHGYDSDEEVDSELGTW	ALQQH(0.049)QH(0.951)GYDSDEEVDSELGTWEHQLR	2.75905e+07	0	0	3.6015e+07	0	0	0	0	0	2.26401e+07	0	0	3.38164e+07	0	0	0	0	0	0	0	0	3.38969e+07	0	0	4.04124e+07	0	0	2.95811e+07	0	0	2.22635e+07	0	0	2.8725e+07	0	0
Q8CH77	1820	0.998821	29.2849	89.344	H	DQSKLYHLPPPSVGPHSTASPPEDRTVKDST	LYHLPPPSVGPH(0.999)STASPPEDR(0.001)	1.97774e+07	0	0	2.37398e+07	0	0	2.37295e+07	0	0	1.84185e+07	0	0	1.49609e+07	0	0	1.51904e+07	0	0	4.21266e+07	0	0	2.26823e+07	0	0	2.3919e+07	0	0	0	0	0	2.76579e+07	0	0	0	0	0
Q8CHG7	571	0.999183	32.8778	57.61	H	GQSQDDSIVGLRQTKHIPAALPVSGTLSSSN	H(0.999)IPAALPVSGTLSSSNPDLLQSH(0.001)HR	2.78735e+07	0	0	8.85652e+07	0	0	5.65589e+07	0	0	3.40474e+07	0	0	3.28601e+07	0	0	6.89061e+07	0	0	1.20625e+08	0	0	5.42064e+07	0	0	6.76038e+07	0	0	0	0	0	4.69653e+07	0	0	0	0	0
Q8CIN4	82	0.794134	5.89266	75.035	H	KEKERPEISPPSDFEHTIHVGFDAVTGEFTG	ER(0.001)PEISPPSDFEH(0.794)TIH(0.204)VGFDAVTGEFTGMPEQWAR	3.02678e+07	0	0	4.71855e+07	0	0	1.23365e+07	0	0	3.22718e+07	0	0	1.50376e+07	0	0	5.54864e+07	0	0	4.52982e+07	0	0	1.84221e+07	0	0	8.60983e+06	0	0	2.08665e+07	0	0	2.85925e+07	0	0	0	0	0
Q8CIN4	85	0.867356	8.28543	62.105	H	ERPEISPPSDFEHTIHVGFDAVTGEFTGMPE	ER(0.004)PEISPPSDFEH(0.129)TIH(0.867)VGFDAVTGEFTGMPEQWAR	0	0	0	0	0	0	1.61203e+07	0	0	0	0	0	0	0	0	0	0	0	0	0	0	4.17524e+07	0	0	0	0	0	0	0	0	0	0	0	0	0	0
Q8CIP5	1153	0.822426	7.90585	75.044	H	LSEDLQIHDGSCCLQHAQAPVSPRDLLLDHQ	LSHRPSILSEDLQIH(0.044)DGSCCLQH(0.822)AQAPVSPR(0.133)	0	0	0	0	0	0	0	0	0	0	0	0	0	0	0	0	0	0	0	0	0	0	0	0	0	0	0	0	0	0	0	0	0	7.54303e+06	0	0
Q8JZK9	485	0.954549	13.3268	79.845	H	PFTNDHSLDEGMGLVHSNTATEHIPSPAKKV	RPFTNDHSLDEGMGLVH(0.955)SNTATEH(0.001)IPSPAK(0.044)	2.89004e+07	0	0	3.05531e+07	0	0	4.41068e+07	0	0	3.62522e+07	0	0	1.34521e+07	0	0	7.50098e+06	0	0	6.60287e+07	0	0	8.2108e+07	0	0	0	0	0	3.63712e+07	0	0	5.99184e+07	0	0	0	0	0
Q8JZK9	492	0.985288	20.9574	117.11	H	LDEGMGLVHSNTATEHIPSPAKKVPRLPATS	RPFTNDHSLDEGMGLVH(0.007)SNTATEH(0.985)IPSPAK(0.008)	1.48277e+07	0	0	7.51563e+07	0	0	3.58663e+07	0	0	3.01811e+07	0	0	5.8919e+07	0	0	6.23596e+07	0	0	6.3782e+07	0	0	3.47169e+07	0	0	0	0	0	0	0	0	2.49208e+07	0	0	7.82549e+06	0	0
Q8JZW4	582	0.99989	38.892	93.404	H	PPPAAPAQSPPQSPAHSPPGSPVHTHI____	AQGIRPRPPPAAPAQSPPQSPAH(1)SPPGSPVH(0.744)TH(0.256)I	9.26765e+07	9.46832e+07	0	1.09666e+07	5.95269e+07	0	0	3.24038e+07	0	3.85e+07	7.5543e+07	0	0	3.93079e+07	0	5.65137e+06	5.99223e+07	0	1.80464e+08	1.17891e+08	0	7.25668e+06	5.97942e+07	0	0	4.45272e+07	0	0	2.37044e+07	0	2.16766e+08	1.43361e+08	0	0	1.15216e+07	0
Q8JZW4	590	0.934405	11.5719	71.265	H	SPPQSPAHSPPGSPVHTHI____________	AQGIR(0.002)PR(0.001)PPPAAPAQSPPQSPAH(0.997)SPPGSPVH(0.934)TH(0.065)I	0	9.46832e+07	0	8.50173e+06	4.14287e+07	0	0	3.24038e+07	0	0	7.00987e+07	0	0	3.93079e+07	0	0	5.99223e+07	0	1.88152e+07	1.09097e+08	0	0	5.97942e+07	0	0	4.28685e+06	0	0	2.37044e+07	0	1.35407e+07	1.43361e+08	0	0	0	0
Q8JZZ7	1142	0.99382	22.063	106.3	H	FRHWYCCGGLPTESPHSSVKASTTRTSARYS	HWYCCGGLPTESPH(0.994)SSVK(0.006)	0	0	0	1.79231e+07	0	0	2.29626e+07	0	0	0	0	0	2.4653e+07	0	0	0	0	0	1.23956e+07	0	0	1.73938e+07	0	0	59025363	0	0	0	0	0	0	0	0	0	0	0
Q8K039	49	0.585183	1.97587	61.612	H	ETKKIQPQLPDEDGNHSDKEDEQPQVVVLKK	K(0.005)IQPQLPDEDGNH(0.585)SDK(0.038)EDEQPQVVVLK(0.371)	0	0	0	7.22083e+06	0	0	0	0	0	0	0	0	0	0	0	0	0	0	0	0	0	0	0	0	0	0	0	0	0	0	0	0	0	0	0	0
Q8K070	87	0.680491	3.28339	127.28	H	TDGCGSPLHRLRSPLHSGPGSPASGSFCLEP	LR(0.32)SPLH(0.68)SGPGSPASGSFCLEPPGLR	0	0	0	0	0	0	0	0	0	0	0	0	0	0	0	7.69755e+06	0	0	0	0	0	0	0	0	0	0	0	0	0	0	6.34293e+06	0	0	0	0	0
Q8K070	131	0.999996	54.8879	159.52	H	PSPLARYRPLHNAASHEGLAATSGSPPRSAP	YRPLHNAASH(1)EGLAATSGSPPR	0	0	0	0	0	0	2.82504e+07	0	0	7.57989e+07	0	0	6.12348e+07	0	0	7.73502e+07	0	0	0	0	0	3.78436e+07	0	0	0	0	0	0	0	0	4.06221e+07	0	0	0	0	0
Q8K0G5	312	0.980177	17.6403	64.002	H	VILSNMVSISSEPFGHLVDDGDISDPEEHHA	VILSNMVSISSEPFGH(0.98)LVDDGDISDPEEH(0.003)HAEK(0.017)	4.39689e+08	0	0	6.15397e+08	0	0	5.25485e+08	0	0	548552813	0	0	3.35822e+08	0	0	3.97204e+08	0	0	818011743	0	0	1024695117	0	0	8.1685e+07	0	0	4.15704e+08	0	0	7.4723e+08	0	0	4.59678e+08	0	0
Q8K0T0	91	0.738253	4.50324	89.882	H	ETASTGMAAVPDALDHSPSSTLKDGEGACYT	SPPVAMETASTGMAAVPDALDH(0.738)SPSSTLK(0.262)	0	0	0	0	0	0	0	0	0	8.19798e+06	0	0	6.19398e+06	0	0	6.22097e+06	0	0	0	0	0	0	0	0	0	0	0	0	0	0	0	0	0	0	0	0
Q8K1M6	627	0.944432	12.4081	75.945	H	KSKPIPIMPASPQKGHAVNLLDVPVPVARKL	SK(0.001)PIPIMPASPQK(0.054)GH(0.944)AVNLLDVPVPVAR	4.08647e+06	0	0	6.56602e+06	0	0	4.50958e+06	0	0	1.47918e+07	0	0	0	0	0	1.18068e+07	0	0	0	0	0	0	0	0	5.73915e+06	0	0	0	0	0	3.53022e+07	0	0	0	0	0
Q8K1X1	207	0.935706	12.8058	119.74	H	KPPSGPGKKVYISSPHSSPAHNKLAAATGAK	VYISSPH(0.936)SSPAH(0.049)NK(0.015)	0	0	0	2.02487e+07	0	0	1.83099e+07	0	0	1.84957e+07	0	0	2.70202e+07	0	0	0	0	0	0	0	0	1.54765e+07	0	0	1.30202e+07	0	0	1.61339e+07	0	0	16165279	0	0	1.08498e+06	0	0
Q8K1X1	212	0.948058	15.3739	96.756	H	PGKKVYISSPHSSPAHNKLAAATGAKKALNK	VYISSPH(0.024)SSPAH(0.948)NK(0.028)	1.58947e+07	0	0	0	0	0	0	0	0	0	0	0	0	0	0	1.33527e+07	0	0	0	0	0	0	0	0	0	0	0	0	0	0	0	0	0	0	0	0
Q8K3I9	251	0.89549	9.823	100.59	H	QSSRHSKEKDRQSPLHGNHITISHTQAIGSR	DR(0.093)QSPLH(0.895)GNH(0.011)ITISHTQAIGSR	1.10197e+07	0	0	1.38687e+07	0	0	2.92572e+07	0	0	8.51764e+06	0	0	0	0	0	9.93719e+06	0	0	2.02614e+07	0	0	9.87967e+06	0	0	1.18129e+07	0	0	1.02642e+07	0	0	1.44612e+07	0	0	0	0	0
Q8K3I9	254	0.629679	3.5736	67.11	H	RHSKEKDRQSPLHGNHITISHTQAIGSRSVP	EK(0.02)DR(0.073)QSPLH(0.277)GNH(0.63)ITISHTQAIGSR	0	0	0	0	0	0	1.08959e+07	0	0	0	0	0	0	0	0	0	0	0	0	0	0	0	0	0	0	0	0	0	0	0	0	0	0	0	0	0
Q8K4Q0	870	0.499893	0	60.517	H	SLTQSAPASPTNKGMHMHQVGGSPPASSTSS	GMH(0.5)MH(0.5)QVGGSPPASSTSSCSLTNDVAK	0	0	0	0	0	0	0	0	0	0	0	0	0	0	0	0	0	0	0	0	0	0	0	0	0	0	0	0	0	0	0	0	0	0	0	0
Q8K4Q0	872	0.941947	12.8445	100.94	H	TQSAPASPTNKGMHMHQVGGSPPASSTSSCS	GMH(0.049)MH(0.942)QVGGSPPASSTSSCSLTNDVAK(0.009)	2.99633e+07	0	0	3.58797e+07	0	0	3.1505e+07	0	0	0	0	0	0	0	0	2.56702e+07	0	0	2.56932e+07	0	0	0	0	0	0	0	0	1.50416e+07	0	0	0	0	0	2.8766e+07	0	0
Q8R0S4	402	0.999965	44.6022	97.813	H	CEHLGEYLEAYWRATHTSSSTPMTPLLGRNV	ATH(1)TSSSTPMTPLLGR	0	0	0	0	0	0	0	0	0	3.95286e+06	0	0	2.70308e+06	0	0	0	0	0	0	0	0	0	0	0	0	0	0	0	0	0	0	0	0	0	0	0
Q8R3Z5	413	1	79.0571	123.67	H	CEHLAEYLEAYWKATHPPSSTPPNPLLNRTM	ATH(1)PPSSTPPNPLLNR	1.27711e+07	0	0	2.65843e+07	0	0	0	0	0	0	0	0	0	0	0	0	0	0	0	0	0	0	0	0	0	0	0	2.84931e+06	0	0	9.80641e+06	0	0	0	0	0
Q8R550	563	0.98327	19.4464	87.605	H	PDIFDSPSPEEDKEEHISLAHRGIDVSKKTS	RPPSQSLTSSSLSSPDIFDSPSPEEDK(0.983)EEH(0.983)ISLAH(0.019)R(0.014)	0	2.53554e+07	0	0	3.62197e+07	0	0	1.76213e+07	0	0	3.779e+07	0	0	3.72884e+07	0	0	3.55563e+07	0	0	5.01439e+07	0	0	4.85987e+07	0	0	0	0	0	3.49586e+07	0	3.6718e+07	0	0	0	5.05585e+07	0
Q8R574	226	0.600726	1.78015	114.63	H	HGEAQDAESDLVDGRHSPPMVRSVAAIHPSL	LGIAVIHGEAQDAESDLVDGR(0.399)H(0.601)SPPMVR(0.001)	2.09205e+08	0	0	2.44284e+08	0	0	1.73954e+08	0	0	2.30712e+08	0	0	287557406	0	0	1.8713e+08	0	0	3.28963e+08	0	0	1.86321e+08	0	0	2.6599e+08	0	0	2.19325e+08	0	0	2.88927e+08	0	0	2.42867e+08	0	0
Q8R5A6	169	0.999345	32.1032	72.231	H	STGDTVPLQRSQSLPHSATVTLSGTSDPHAL	SQSLPH(0.999)SATVTLSGTSDPHALADSALSK(0.001)	1.58054e+07	0	0	1.47183e+07	0	0	1.49435e+07	0	0	0	0	0	1.99163e+07	0	0	1.13261e+07	0	0	1.43512e+07	0	0	0	0	0	0	0	0	0	0	0	0	0	0	0	0	0
Q8VBY2	98	0.940333	12.075	63.728	H	CLGAQVGPYSTGPASHISPRSWRRPTIESHR	KFSLQER(0.001)PAGSCLGAQVGPYSTGPASH(0.94)ISPR(0.058)	0	0	0	1.74158e+07	0	0	1.40805e+07	0	0	1.96282e+07	0	0	1.32571e+07	0	0	12057617	0	0	1.54162e+07	0	0	1.69032e+07	0	0	0	0	0	2.41291e+07	0	0	2.37121e+07	0	0	1.47084e+07	0	0
Q8VCI5	38	0.993969	22.2088	127.01	H	ESALDDFDKAKPSPEHAPTISAPDASGPQKR	AK(0.006)PSPEH(0.994)APTISAPDASGPQK	2.9189e+07	0	0	4.36446e+07	0	0	4.60065e+07	0	0	4.23611e+07	0	0	4.35126e+07	0	0	3.66385e+07	0	0	3.11137e+07	0	0	4.12113e+07	0	0	2.83862e+07	0	0	2.65657e+07	0	0	3.49961e+07	0	0	3.42675e+07	0	0
Q8VCZ9	149	0.846057	7.39271	55.206	H	AMLRCVDLSRALVDAHGPARNSLMQLKVTAL	CVDLSR(0.155)ALVDAH(0.846)GPAR(0.999)NSLMQLK(1)	0	0	0	0	0	0	0	0	0	0	0	0	0	0	0	0	0	0	0	0	0	0	0	0	0	0	0	0	0	1.19303e+07	0	0	0	0	0	1.16864e+07
Q8VD37	368	0.980454	19.5335	130.01	H	GPTGSAGPPGPPGPRHVPSPLNLEEVQKKVA	H(0.98)VPSPLNLEEVQK(0.011)K(0.009)	0	0	0	1.81098e+07	0	0	2.42199e+07	0	0	1.96299e+07	0	0	3.14958e+07	0	0	3.5956e+07	0	0	1.9079e+07	0	0	2.62973e+07	0	0	0	0	0	4.17941e+07	0	0	1.07903e+08	0	0	4.46925e+07	0	0
Q8VD37	488	1	82.7095	118.2	H	KPGVGDVSRPFSPPIHSSSPPPIAPLARAES	PFSPPIH(1)SSSPPPIAPLAR	3.41823e+07	546267351	0	9.49296e+07	7.93764e+08	0	1.02304e+07	3.19141e+08	0	4.99098e+07	4.35897e+08	0	7.78456e+07	3.70615e+08	0	3.61219e+07	6.98245e+08	0	1.19156e+08	7.97133e+08	0	1.87962e+08	6.35179e+08	0	3.9871e+07	7.98071e+08	0	3.32229e+07	4.88029e+08	0	7.64285e+07	7.15078e+08	0	4.9311e+07	4.42769e+08	0
Q8VD37	314	1	140.427	195.72	H	LSPKSVAVNTEEKWVHFSDASPEHVTPELTP	WVH(1)FSDASPEH(1)VTPELTPR	5.47008e+08	4.64413e+07	0	509800087	7.14162e+07	0	3.60661e+08	8.43576e+07	0	3.74173e+08	6.43084e+07	0	5.92471e+08	5.64042e+07	0	5.37346e+08	4.43831e+07	0	4.85298e+08	1.14396e+08	0	5.53761e+08	5.8136e+07	0	4.54714e+08	9.31122e+07	0	7.25023e+08	2.70309e+07	0	9.61873e+08	5.4209e+07	0	9.58608e+08	3.1966e+07	0
Q8VD37	322	1	124.853	174.21	H	NTEEKWVHFSDASPEHVTPELTPREQVVTPP	WVH(1)FSDASPEH(1)VTPELTPR	0	4.64413e+07	0	0	7.14162e+07	0	0	8.43576e+07	0	0	6.43084e+07	0	0	5.64042e+07	0	0	4.43831e+07	0	0	1.14396e+08	0	0	5.8136e+07	0	7.06665e+07	9.31122e+07	0	0	2.70309e+07	0	1.36219e+08	5.4209e+07	0	0	3.1966e+07	0
Q8VDZ4	369	0.989134	19.5919	134.04	H	YRPGYSSSSTSAAMPHSSSAKLSRGDSLKEP	YRPGYSSSSTSAAMPH(0.989)SSSAK(0.011)	2.94671e+07	0	0	3.31791e+07	0	0	1.97431e+07	0	0	2.93286e+07	0	0	0	0	0	2.99012e+07	0	0	3.5458e+07	0	0	1.98991e+07	0	0	0	0	0	2.23004e+07	0	0	4.53194e+07	0	0	3.18561e+07	0	0
Q8VED9	18	0.999713	35.4202	92.063	H	GSVADSDAVVKLDDGHLNNSLGSPVQADVYF	LDDGH(1)LNNSLGSPVQADVYFPR	0	0	0	7.7341e+06	0	0	7.41131e+06	0	0	0	0	0	3.24325e+06	0	0	0	0	0	0	0	0	0	0	0	0	0	0	0	0	0	0	0	0	0	0	0
Q8VEK3	258	0.990957	21.1527	109.17	H	SRAKSPQPPVEEEDEHFDDTVVCLDTYNCDL	AK(0.008)SPQPPVEEEDEH(0.991)FDDTVVCLDTYNCDLHFK(0.001)	3.59025e+08	0	0	1201305395	0	0	4.50354e+08	0	0	7.71185e+08	0	0	4.16334e+08	0	0	6.38846e+06	0	0	9.41128e+08	0	0	6.90808e+08	0	0	6.10579e+08	0	0	858039813	0	0	1804284953	0	0	1519207719	0	0
Q8VHH7	583	0.999996	54.4752	82.8	H	LQDLADRVVDASEDEHELNQLLNEALLERES	VVDASEDEH(1)ELNQLLNEALLER	0	0	0	3.83826e+06	0	0	0	0	0	7.85326e+06	0	0	0	0	0	4.05578e+06	0	0	0	0	0	8.05971e+06	0	0	0	0	0	0	0	0	5.37428e+06	0	0	0	0	0
Q8VHL1	15	0.999863	38.647	74.529	H	_MDSDDEVVEEAVEGHLDDDGLPHGFCTVTY	MDSDDEVVEEAVEGH(1)LDDDGLPHGFCTVTYSSTDR	1.96521e+07	0	0	2.23626e+07	0	0	3.60907e+07	0	0	4.20546e+07	0	0	4.83212e+07	0	0	6.46261e+07	0	0	1.02022e+08	0	0	0	0	0	6.90848e+07	0	0	7.94976e+07	0	0	9.55394e+07	0	0	9.36552e+07	0	0
Q91V24	1767	1	65.9238	65.924	H	MAQGPLFLLITLLLQHRNRLLPQSKPRLLPP	NLLAMMAQGPLFLLITLLLQH(1)R(1)	0	0	0	0	5.89721e+06	0	0	2.65877e+06	0	0	0	0	0	4.77989e+06	0	0	0	0	0	0	0	0	0	0	0	0	0	0	0	0	0	0	0	0	0	0
Q91W43	555	0.984077	20.717	83.877	H	VRYMKKLENKDISLVHSMIPLGSCTMKLNSS	LENK(1)DISLVH(0.984)SMIPLGSCTMK(0.016)	0	0	0	0	0	0	0	0	0	0	0	0	0	0	0	0	0	0	0	0	0	0	0	0	0	0	0	0	0	0	0	0	0	0	0	0
Q91XF0	248	0.999183	30.8806	143.56	H	RRGLATGDSPLGPMTHHGEEDWVYERLAP__	GLATGDSPLGPMTH(0.999)H(0.001)GEEDWVYER	2.56066e+07	0	0	6.97481e+07	0	0	4.70276e+07	0	0	8.7765e+07	0	0	9.00999e+07	0	0	5.31141e+07	0	0	3.35278e+07	0	0	6.42932e+07	0	0	5.45676e+07	0	0	4.33814e+07	0	0	8.49413e+07	0	0	7.69037e+07	0	0
Q91XM9	56	0.995242	23.2834	130.15	H	LVHVSEKNLSQIENVHGYVLQSHISPLKASP	NLSQIENVH(0.995)GYVLQSHISPLK(0.005)	6.1743e+08	0	0	0	0	0	0	0	0	2.81446e+08	0	0	8.53101e+07	0	0	3.8852e+07	0	0	0	0	0	7.68337e+08	0	0	0	0	0	1.09169e+08	0	0	0	0	0	6.92137e+06	0	0
Q91XM9	63	0.978441	16.8586	69.975	H	NLSQIENVHGYVLQSHISPLKASPAPIIVNT	NLSQIENVH(0.001)GYVLQSH(0.978)ISPLK(0.02)	1.24279e+08	0	0	1.21897e+08	0	0	1.15406e+08	0	0	4.49077e+07	0	0	1.04355e+07	0	0	6.94327e+07	0	0	2.10698e+08	0	0	4.39453e+07	0	0	8.45462e+07	0	0	3.23281e+07	0	0	8.30942e+07	0	0	3.62757e+07	0	0
Q91YS8	334	0.999483	32.8659	108.78	H	LQLGTSQEGQGQTGSHGELLTPTAGGPAAGC	K(0.001)LQLGTSQEGQGQTGSH(0.999)GELLTPTAGGPAAGCCCR	3.2599e+07	0	0	5.14017e+07	0	0	4.29315e+07	0	0	3.22855e+07	0	0	2.95546e+07	0	0	4.36327e+07	0	0	0	0	0	6.52948e+07	0	0	4.46468e+07	0	0	3.65984e+07	0	0	3.27223e+07	0	0	3.72446e+07	0	0
Q91ZW3	63	0.561021	1.06536	53.033	H	AGSGPADTEMEEVFDHGSPGKQKEIQEPDPT	GGPEGGAAPAAPCAAGSGPADTEMEEVFDH(0.561)GSPGK(0.439)	0	0	0	0	0	0	0	0	0	0	0	0	0	0	0	0	0	0	0	0	0	0	0	0	0	0	0	0	0	0	9.04153e+06	0	0	0	0	0
Q920P5	102	1	77.6346	83.467	H	NSNFPYRRYDRLPPIHQFSIESDTDLSETAE	LPPIH(1)QFSIESDTDLSETAELIEEYEVFDPTRPRPK	2.80915e+07	0	0	3.99909e+07	0	0	4.97396e+07	0	0	4.96565e+06	0	0	1.08729e+07	0	0	1.63856e+07	0	0	5.21909e+07	0	0	1.04886e+08	0	0	2.27597e+07	0	0	0	0	0	1.46005e+07	0	0	4.20876e+06	0	0
Q920Q2	803	0.999842	41.4085	112.85	H	TDSAKIIGKATLNMFHTMKLNISDMRGVGIQ	IIGK(1)ATLNMFH(1)TMK(1)LNISDMR(0.001)	0	0	0	0	1.99149e+08	0	0	131071392	0	0	184210371	0	0	1.75328e+08	0	0	2.1517e+08	0	0	0	0	0	220399713	0	0	0	0	0	1.60707e+08	0	0	0	0	0	8.80987e+07	0
Q924H7	530	1	115.398	120.93	H	LQRLSSQRSPSPGPNHTCSSNASTATVVPQN	LSSQR(1)SPSPGPNH(1)TCSSNASTATVVPQNASAR	0	2.04673e+07	0	0	0	0	0	2.67471e+07	0	0	1.65914e+07	0	0	0	0	0	2.84782e+07	0	0	1.59256e+07	0	0	2.34231e+07	0	0	0	0	0	1.53981e+07	0	0	2.03695e+07	0	0	1.152e+07	0
Q99K28	144	0.985156	20.7408	198.37	H	HGTDLWIDSMNSAPSHSPEKKDSDFFTEHTQ	HGTDLWIDSMNSAPSH(0.985)SPEK(0.008)K(0.007)	8.81579e+07	0	0	9.47662e+07	0	0	9.22799e+07	0	0	4.13359e+07	0	0	4.66476e+07	0	0	4.79337e+07	0	0	5.11033e+07	0	0	5.41068e+07	0	0	6.63065e+07	0	0	7.79849e+07	0	0	1.14054e+08	0	0	1.14418e+08	0	0
Q99KN9	300	0.945668	12.986	112.64	H	RTANPSKTIDLGAAAHYTGDKASPDQNASTH	TIDLGAAAH(0.946)YTGDK(0.048)ASPDQNASTH(0.006)TPQSSAKPSVPSSK(0.001)	1.13041e+08	0	0	3.23388e+07	0	0	1.18752e+07	0	0	0	0	0	8.35231e+07	0	0	2.76208e+07	0	0	3.73943e+07	0	0	0	0	0	1.05831e+08	0	0	5.98192e+07	0	0	1.72169e+08	0	0	1.20911e+08	0	0
Q99KN9	315	0.987929	19.6743	138.82	H	HYTGDKASPDQNASTHTPQSSAKPSVPSSKS	TIDLGAAAHYTGDK(0.011)ASPDQNASTH(0.988)TPQSSAK(0.001)PSVPSSK	1.04205e+07	0	0	0	0	0	1.63767e+07	0	0	1.79754e+07	0	0	0	0	0	1.54253e+07	0	0	0	0	0	0	0	0	0	0	0	0	0	0	0	0	0	0	0	0
Q99LB0	235	0.999995	52.9607	78.939	H	KALGMGGTRGRIYIKHPHLFKYAADPQDKHW	H(1)PH(1)LFK(1)YAADPQDK	0	0	0	0	0	0	0	0	0	0	0	0	0	0	0	0	0	0	0	0	0	0	0	0	0	0	0	0	0	0	0	0	0	0	0	2.54924e+07
Q99LB0	237	0.999993	51.8056	78.939	H	LGMGGTRGRIYIKHPHLFKYAADPQDKHWLA	H(1)PH(1)LFK(1)YAADPQDK	0	0	0	0	0	0	0	0	0	0	0	0	0	0	0	0	0	0	0	0	0	0	0	0	0	0	0	0	0	0	0	0	0	0	0	2.54924e+07
Q99LB6	275	0.741635	4.65818	69.578	H	EMACAIADAFNLPSSHLRPITDSPVIGAQRP	YEMACAIADAFNLPSSH(0.742)LR(0.254)PITDSPVIGAQR(0.001)PK(0.004)	0	0	0	0	0	0	0	0	0	0	0	0	0	0	0	2.11273e+07	0	0	4.787e+07	0	0	0	0	0	0	0	0	0	0	0	0	0	0	0	0	0
Q99N57	230	0.46343	0	49.453	H	RRMRESVSRMPASSQHRYSTPHAFTFNTSSP	MPASSQH(0.463)R(0.463)YSTPH(0.073)AFTFNTSSPSSEGSLSQR	0	0	0	0	0	0	0	0	0	0	0	0	0	0	0	0	0	0	0	0	0	0	0	0	0	0	0	0	0	0	0	0	0	0	0	0
Q99N57	236	0.38926	1.05414	63.625	H	VSRMPASSQHRYSTPHAFTFNTSSPSSEGSL	MPASSQH(0.305)R(0.305)YSTPH(0.389)AFTFNTSSPSSEGSLSQR	0	0	0	0	0	0	0	0	0	0	0	0	0	0	0	0	0	0	0	0	0	0	0	0	0	0	0	0	0	0	0	0	0	0	0	0
Q99PL6	115	1	68.3481	71.042	H	PGTNSVPEPKEEISPHLAVPGVFFICPLTGV	EEISPH(1)LAVPGVFFICPLTGVTLR	0	0	0	1.42546e+07	0	0	4.66586e+06	0	0	0	0	0	9.56811e+06	0	0	5.74051e+06	0	0	0	0	0	1.39175e+07	0	0	8.27809e+06	0	0	1.07848e+07	0	0	1.05035e+07	0	0	0	0	0
Q99PP7	652	0.937217	12.2204	49.199	H	HSNPGHAGPFPVVSAHNPINPTSPTTATMAN	QH(0.005)SNPGH(0.056)AGPFPVVSAH(0.937)NPINPTSPTTATMANANR(0.002)	0	0	0	1.548e+07	0	0	1.06761e+07	0	0	0	0	0	0	0	0	0	0	0	7.70354e+06	0	0	0	0	0	0	0	0	0	0	0	0	0	0	0	0	0
Q99PT1	23	0.924741	11.8776	49.835	H	AEQLAQIAAENEEDEHSVNYKPPAQKSIQEI	AEQEPTAEQLAQIAAENEEDEH(0.925)SVNYK(0.06)PPAQK(0.015)	0	0	0	0	0	0	6.42546e+06	0	0	1.13136e+07	0	0	0	0	0	1.40442e+07	0	0	0	0	0	0	0	0	6.17036e+06	0	0	1.84171e+07	0	0	0	0	0	0	0	0
Q99PV8	768	0.999943	42.509	111.93	H	GLSGRSGTASGGSTPHLGGPGPGRPSSKEGR	SGTASGGSTPH(1)LGGPGPGRPSSK	0	0	0	2.11147e+07	0	0	2.69692e+07	0	0	9.73297e+06	0	0	0	0	0	0	0	0	1.00785e+07	0	0	1.76842e+07	0	0	2.5461e+07	0	0	0	0	0	1.70389e+07	0	0	0	0	0
Q9CQS4	192	0.89121	8.91483	43.807	H	EGIISEFTPLPREVSHKLNPKQIGEHLLLKC	GMGSTFIVQGVTLGAEGIISEFTPLPR(0.153)EVSH(0.891)K(0.956)	0	4.43412e+07	0	0	3.57077e+07	0	0	5.06205e+07	0	0	2.2022e+08	0	0	5.96958e+07	0	0	9.73813e+07	0	0	2.58878e+07	0	0	9.2385e+07	0	0	103141400	0	0	0	0	0	6.88095e+07	0	0	2.17352e+07	0
Q9CQS4	41	1	70.5627	138.31	H	GPFHARSFGSGTELGHWVTTPPDIPGSRNLH	SFGSGTELGH(1)WVTTPPDIPGSR	8.47395e+07	0	0	6.29596e+07	0	0	7.00938e+07	0	0	7.13016e+07	0	0	9.25396e+07	0	0	1.02229e+08	0	0	1.29714e+08	0	0	159598231	0	0	8.76148e+07	0	0	1.36248e+08	0	0	1.40375e+08	0	0	9.95677e+07	0	0
Q9CWZ7	204	1	57.8017	57.802	H	NYPTCYKKTIAQVLVHLHRNDYVAAERCVRE	TIAQVLVH(1)LH(1)R(1)NDYVAAER(1)	0	0	0	0	0	0	0	0	0	0	0	4.27749e+06	0	0	0	0	0	0	0	0	0	0	0	0	0	0	0	0	0	6.31748e+06	0	0	0	0	0	0
Q9CWZ7	206	1	57.8017	57.802	H	PTCYKKTIAQVLVHLHRNDYVAAERCVRESY	TIAQVLVH(1)LH(1)R(1)NDYVAAER(1)	0	0	0	0	0	0	0	0	0	0	0	4.27749e+06	0	0	0	0	0	0	0	0	0	0	0	0	0	0	0	0	0	6.31748e+06	0	0	0	0	0	0
Q9CX80	113	0.999359	31.5768	82.029	H	DPDKVSSVLALVGKAHALKHKVEPMYFKILS	AH(0.999)ALK(0.97)H(0.97)K(0.078)VEPMYFK(0.984)	0	0	0	0	0	0	0	0	0	0	0	0	0	0	4.6003e+06	0	0	0	0	0	7.93956e+06	0	0	0	0	0	7.76982e+06	0	0	0	0	0	0	0	0	0
Q9CX80	117	0.969618	14.8219	82.029	H	VSSVLALVGKAHALKHKVEPMYFKILSGVIL	AH(0.999)ALK(0.97)H(0.97)K(0.078)VEPMYFK(0.984)	0	0	0	0	0	0	0	0	0	0	0	0	0	0	4.6003e+06	0	0	0	0	0	7.93956e+06	0	0	0	0	0	7.76982e+06	0	0	0	0	0	0	0	0	0
Q9CZ44	175	0.434997	0	83.226	H	APEEESAYVAGERRRHSGQDVHVVLKLWKTG	R(0.435)H(0.435)SGQDVH(0.113)VVLK(0.017)	0	0	0	0	0	0	0	0	0	0	0	0	0	0	0	0	0	0	0	0	0	0	0	0	0	0	0	0	0	0	0	0	0	0	0	0
Q9CZ44	181	0.990131	20.686	89.805	H	AYVAGERRRHSGQDVHVVLKLWKTGFSLDNG	R(0.001)H(0.001)SGQDVH(0.99)VVLK(0.008)	1.06108e+07	0	0	1.1582e+08	0	0	3.03312e+07	0	0	0	0	0	9.94591e+07	0	0	0	0	0	0	0	0	0	0	0	6.78348e+06	0	0	0	0	0	0	0	0	3.13322e+07	0	0
Q9CZT4	44	0.980744	17.0423	47.38	H	QYPVRPASMTYDDIPHLSAKIKPKQQKVELE	SLAEK(0.997)LYLFQYPVR(0.025)PASMTYDDIPH(0.981)LSAK(0.997)	0	0	0	0	0	0	0	0	0	0	0	3.03924e+06	0	0	0	0	0	0	0	0	0	0	0	0	0	0	0	0	0	0	0	0	0	0	0	0
Q9CZW5	101	0.995053	23.0353	119	H	RKTPEGRASPALGSGHHDGSGDSLEMSSLDR	ASPALGSGH(0.995)H(0.005)DGSGDSLEMSSLDR	8.49194e+07	0	0	1.28409e+08	0	0	104763209	0	0	8.14544e+06	0	0	6.11254e+07	0	0	8.57584e+07	0	0	3.96343e+07	0	0	6.84469e+07	0	0	0	0	0	2.18111e+07	0	0	7.55571e+07	0	0	23330994	0	0
Q9CZW5	102	0.573005	1.27735	97.767	H	KTPEGRASPALGSGHHDGSGDSLEMSSLDRA	ASPALGSGH(0.427)H(0.573)DGSGDSLEMSSLDR	0	0	0	0	0	0	0	0	0	0	0	0	0	0	0	0	0	0	0	0	0	0	0	0	0	0	0	0	0	0	1.8944e+07	0	0	0	0	0
Q9D0F9	118	0.999477	32.8095	132.51	H	IRKIKAIGGIILTASHNPGGPNGDFGIKFNI	AIGGIILTASH(0.999)NPGGPNGDFGIK(0.001)	8.17917e+07	0	0	0	0	0	2.61636e+07	0	0	1.23225e+08	0	0	1.2118e+08	0	0	1.23724e+08	0	0	6.15296e+07	0	0	1.49791e+08	0	0	8.2301e+07	0	0	8.25158e+07	0	0	8.50381e+07	0	0	1.44221e+08	0	0
Q9D0M1	313	1	59.7887	59.789	H	EESPIDEVVVTNTVPHELQKLQCPKIKTVDI	LIEESPIDEVVVTNTVPH(1)ELQK(1)LQCPK(1)IK(1)	0	0	0	0	0	0	0	0	0	0	0	0	0	0	0	0	0	0	0	0	2.13166e+07	0	0	0	0	0	0	0	0	0	0	0	0	0	0	8.80059e+06
Q9D1J3	9	0.971638	16.3713	88.338	H	_______MAAETVELHKLKLAELKQECLARG	AAETVELH(0.972)K(0.039)LK(0.053)LAELK(0.936)	0	0	0	0	0	0	0	0	0	0	0	0	0	0	0	0	0	0	0	0	0	0	0	0	0	0	0	0	0	0	0	0	0	0	0	0
Q9D3A8	396	0.475884	0.667928	45.671	H	LPVLCESTTPKPEDLHSPLLGAGLADFAHPA	SGALPVLCESTTPK(0.112)PEDLH(0.476)SPLLGAGLADFAH(0.408)PAGSPLGR(0.004)	0	0	0	0	0	0	0	0	0	0	0	0	0	0	0	0	0	0	0	0	0	0	0	0	0	0	0	0	0	0	0	0	0	0	0	0
Q9D6I9	103	0.999862	38.5931	132.31	H	EAVRWLLEERGTLTSHCSSLTSSQYSLTGGS	GTLTSH(1)CSSLTSSQYSLTGGSPGR	4.87242e+06	0	0	0	0	0	0	0	0	0	0	0	0	0	0	0	0	0	0	0	0	0	0	0	0	0	0	0	0	0	2.23372e+07	0	0	0	0	0
Q9D906	681	0.999984	47.9981	54.53	H	SSHSFLEDLTGLTLLHQETQAAEIWDMSDEE	VFNSSHSFLEDLTGLTLLH(1)QETQAAEIWDMSDEETV	5.52751e+06	0	0	7.75348e+06	0	0	1.69684e+07	0	0	0	0	0	7.72336e+06	0	0	8.64979e+06	0	0	4.61446e+07	0	0	2.31361e+07	0	0	1.81278e+07	0	0	0	0	0	1.02801e+07	0	0	5.98458e+06	0	0
Q9DBN4	181	0.980031	16.9088	144.41	H	EKHPASAQSTPSSTPHASPKQKSRGWFPSGS	HPASAQSTPSSTPH(0.98)ASPK(0.02)	1.29054e+07	0	0	0	0	0	1.99301e+07	0	0	2.48244e+07	0	0	2.04508e+07	0	0	1.59619e+07	0	0	0	0	0	0	0	0	0	0	0	1.30716e+07	0	0	0	0	0	0	0	0
Q9DCL8	77	0.856512	7.75919	52.486	H	KDYGLMKIDEPNTPYHNMIGDDEDAYSDSEG	IDEPNTPYH(0.857)NMIGDDEDAYSDSEGNEVMTPDILAK(0.143)	0	0	0	0	0	0	0	0	0	0	0	0	0	0	0	2.08975e+07	0	0	0	0	0	0	0	0	0	0	0	1.64187e+07	0	0	0	0	0	2.38797e+07	0	0
Q9EP53	1136	0.999983	47.872	97.469	H	DSGTENKTSLSLDAPHPSSPNSDNVGQLHIM	TSLSLDAPH(1)PSSPNSDNVGQLHIMDYNETHPEHS	0	0	0	1.25896e+07	0	0	1.18215e+07	0	0	2.46776e+07	0	0	1.4149e+07	0	0	2.19747e+07	0	0	2.40212e+07	0	0	0	0	0	1.35486e+07	0	0	1.61687e+07	0	0	1.86074e+07	0	0	1.61881e+07	0	0
Q9EPK5	88	1	78.1441	89.297	H	HPGPRLAGGAQHVRSHSSPASLQLGTGAGAA	SH(1)SSPASLQLGTGAGAAGGPAQQHAHLR	0	0	0	0	0	0	0	0	0	0	0	0	0	0	0	2.0114e+07	0	0	8.23629e+06	0	0	0	0	0	1.05866e+07	0	0	0	0	0	0	0	0	0	0	0
Q9ER47	1167	1	101.84	111.58	H	ELDPRQRKTYLHPIRHPSLPDSSLSTVGILG	H(1)PSLPDSSLSTVGILGLHR	1.61618e+07	0	0	4.06258e+07	0	0	2.65899e+07	0	0	9.2513e+06	0	0	5.5252e+06	0	0	1.19367e+07	0	0	4.49952e+07	0	0	4.50075e+07	0	0	3.51099e+07	0	0	7.07304e+06	0	0	0	0	0	9.42047e+06	0	0
Q9ER64	808	0.333333	0	74.505	H	VPGGESPCPRCRREVHRLKMLQEAVLSIQEA	EVH(0.333)R(0.333)LK(0.333)MLQEAVLSIQEAQQELH(0.955)R(0.045)	0	0	0	0	0	0	0	0	0	0	0	0	0	0	0	0	0	0	0	0	0	0	0	0	0	0	0	0	0	0	0	0	0	0	0	0
Q9ER64	828	0.954615	13.2292	74.505	H	LQEAVLSIQEAQQELHRHLSTMLSSTVRAGQ	EVH(0.333)R(0.333)LK(0.333)MLQEAVLSIQEAQQELH(0.955)R(0.045)	0	4.34077e+06	0	0	0	0	0	0	0	0	5.5774e+06	0	0	0	0	0	0	0	0	6.41394e+06	0	0	1.04948e+07	0	0	0	0	0	0	0	0	0	0	0	0	0
Q9ERU9	2735	0.790544	6.69182	60.029	H	SKGGEDEDGSDEDVVHNEDIHFEPIVSLPEV	GGEDEDGSDEDVVH(0.791)NEDIH(0.04)FEPIVSLPEVEVK(0.169)	0	0	0	0	0	0	0	0	0	1.19524e+07	0	0	9.57872e+06	0	0	0	0	0	0	0	0	0	0	0	0	0	0	0	0	0	0	0	0	0	0	0
Q9ES74	194	0.999801	37.0063	109.16	H	DLGLGRFFSSKTTAAHSLVGTPYYMSPERIH	TTAAH(1)SLVGTPYYMSPER	0	0	0	0	0	0	0	0	0	0	0	0	2.75758e+06	0	0	1.93396e+06	0	0	0	0	0	0	0	0	0	0	0	0	0	0	0	0	0	0	0	0
Q9ESE1	1762	0.951776	12.9527	80.667	H	APSSAVSVVSSVDPTHASDTGGESPGSRSPK	KSSVLPSALTTSAPSSAVSVVSSVDPTH(0.952)ASDTGGESPGSR(0.048)	0	0	0	1.77154e+07	0	0	1.55203e+07	0	0	9.60418e+06	0	0	0	0	0	8.71864e+06	0	0	0	0	0	0	0	0	1.15682e+07	0	0	0	0	0	0	0	0	0	0	0
Q9ESJ4	124	0.980118	16.9303	114.71	H	TSASSATVMTPSTSDHHLDAAVSRQPNGVCR	RGTSASSATVMTPSTSDH(0.98)H(0.02)LDAAVSR	3.58223e+07	0	0	4.01932e+07	0	0	2.37601e+07	0	0	3.71469e+07	0	0	4.93126e+07	0	0	5.22976e+07	0	0	2.37041e+07	0	0	1.86026e+07	0	0	3.56259e+07	0	0	5.40163e+07	0	0	5.74718e+07	0	0	5.00771e+07	0	0
Q9ESN9	600	0.840377	7.21378	113.81	H	SSPPPAKRSYPSVNIHYKSPTAAGFSQRRSH	SYPSVNIH(0.84)YK(0.16)SPTAAGFSQR	0	0	0	0	0	0	0	0	0	0	0	0	0	0	0	5.53045e+07	0	0	0	0	0	0	0	0	0	0	0	0	0	0	1.63679e+07	0	0	0	0	0
Q9ESU6	77	0.503159	0	72.421	H	QLQYLLRVVLKTLWKHQFAWPFQQPVDAVKL	VVLKTLWK(0.503)H(0.503)QFAWPFQQPVDAVK(0.993)	0	0	0	0	0	0	0	0	0	0	0	0	0	0	0	0	2.42052e+07	0	0	1.63358e+08	0	0	5.05415e+07	0	0	0	0	0	1.49727e+08	0	0	0	0	0	0	0
Q9JHG2	163	0.999662	39.2844	118.76	H	YELHAGTESTPSVVVHVCDSDMEEEEDPKTS	YELHAGTESTPSVVVH(1)VCDSDMEEEEDPKTSPKPK	1.18363e+07	0	0	9.10627e+06	0	0	8.1138e+06	0	0	1.60324e+07	0	0	1.21784e+07	0	0	1.71001e+07	0	0	0	0	0	0	0	0	3.5742e+06	0	0	2.26903e+07	0	0	2.18449e+07	0	0	1.90839e+07	0	0
Q9JHG6	148	0.94743	14.354	46.645	H	EMKLYFAQTLHIGSSHLAPPNPDKQFLISPP	LYFAQTLH(0.041)IGSSH(0.947)LAPPNPDK(0.197)QFLISPPASPPVGWK(0.814)	0	0	0	0	0	0	0	0	0	0	0	0	0	0	0	0	0	0	0	0	0	0	0	0	0	0	0	0	0	0	0	2.52969e+07	0	0	0	0
Q9JHU4	3263	0.999639	34.4238	93.649	H	AEKKKVMSQEIQEQLHKQQEVIADKQMSVKE	K(1)VMSQEIQEQLH(1)K(1)QQEVIADK(0.001)	0	0	0	0	0	0	0	0	0	0	0	0	0	0	0	0	0	0	0	0	0	0	0	0	0	0	0	0	0	0	0	0	0	0	0	0
Q9JI38	361	0.998388	35.5926	42.301	H	VTHLQQLWANHAVKTHMLYSMLQGLDSVMVT	TH(0.998)MLYSMLQGLDSVMVTCAAGTK(0.996)MDEATEWR(0.002)NIQPPVIK(0.004)	0	9.20191e+06	0	0	0	0	0	0	0	0	0	0	0	0	0	0	2.98113e+06	0	0	0	0	0	0	0	0	0	0	0	7.97746e+06	0	0	1.29099e+07	0	0	0	0
Q9JI76	155	0.999999	62.1355	65.213	H	VLQMNGFSYEIEPIKHSSTFEHLVYTLNNNK	H(1)SSTFEH(1)LVYTLNNNK(0.778)TQFPPMLCSLTEK(0.183)R(0.04)	0	0	0	0	0	0	0	0	0	0	0	0	0	0	0	0	0	0	0	0	0	0	0	0	0	0	0	0	0	0	0	0	0	0	0	0
Q9JI76	161	0.999999	62.0849	65.213	H	FSYEIEPIKHSSTFEHLVYTLNNNKTQFPPM	H(1)SSTFEH(1)LVYTLNNNK(0.778)TQFPPMLCSLTEK(0.183)R(0.04)	0	0	0	0	0	0	0	0	0	0	0	0	0	0	0	0	0	0	0	0	0	0	0	0	0	0	0	0	0	0	0	0	0	0	0	0
Q9JIA7	382	0.478136	0.990998	67.252	H	VLAPAPAPAATHSPLHRSVSDLPLPLPQPAL	SELVLAPAPAPAATH(0.381)SPLH(0.478)R(0.141)	0	0	0	0	0	0	0	0	0	0	0	0	0	0	0	0	0	0	0	0	0	0	0	0	0	0	0	0	0	0	0	0	0	0	0	0
Q9JIQ8	324	0.499452	0	70.26	H	FAGILRQSLMFYGSRHQVEKVISHPNYDSKT	H(0.499)QVEK(0.501)VISH(0.002)PNYDSK(0.998)	0	0	0	0	0	0	0	0	0	0	0	0	0	0	0	0	0	0	0	0	0	0	0	0	0	0	0	0	0	0	0	0	0	0	0	0
Q9JJ69	88	0.565522	1.29306	60.951	H	DPDSVEDEFELSTVCHRPEGLEQLQEQTKFT	PLDPDSVEDEFELSTVCH(0.566)R(0.42)PEGLEQLQEQTK(0.015)	0	0	0	6.04286e+07	0	0	0	0	0	0	0	0	0	0	0	0	0	0	3.26768e+08	0	0	1.20816e+08	0	0	1.56717e+08	0	0	0	0	0	1.70151e+08	0	0	0	0	0
Q9JJR8	137	0.999957	43.6242	118.15	H	YLTLVEPILKRRLFGHSQLLQSDDDVGDHQP	LFGH(1)SQLLQSDDDVGDHQPFANAHDVLAR	4.31724e+07	0	0	4.69202e+07	0	0	4.12606e+07	0	0	0	0	0	3.01119e+07	0	0	2.22935e+07	0	0	4.32052e+07	0	0	5.09501e+07	0	0	4.28252e+07	0	0	1.35282e+07	0	0	2.83162e+07	0	0	2.12438e+07	0	0
Q9JJR8	150	0.99973	36.0514	107.47	H	FGHSQLLQSDDDVGDHQPFANAHDVLARSRS	LFGHSQLLQSDDDVGDH(1)QPFANAHDVLAR	0	0	0	0	0	0	9.05285e+06	0	0	0	0	0	0	0	0	0	0	0	1.32369e+07	0	0	0	0	0	1.21743e+07	0	0	0	0	0	9.77588e+06	0	0	0	0	0
Q9JKK0	199	0.875898	10.2927	48.305	H	YELHAGTESTPSVVVHVCESETEEEEDTKNP	YELH(0.082)AGTESTPSVVVH(0.876)VCESETEEEEDTK(0.022)NPK(0.02)	3.09092e+06	0	0	0	0	0	0	0	0	0	0	0	0	0	0	0	0	0	1.13596e+07	0	0	0	0	0	0	0	0	7.41286e+06	0	0	1.10576e+07	0	0	0	0	0
Q9JM52	721	0.926548	11.0618	119.39	H	SDPGWERSDSVLPASHGHLPQAGSLERNRNR	SDSVLPASH(0.927)GH(0.001)LPQAGSLER(0.073)	8.59851e+06	0	0	1.75745e+07	0	0	0	0	0	0	0	0	0	0	0	0	0	0	0	0	0	0	0	0	0	0	0	0	0	0	0	0	0	0	0	0
Q9JMH9	2007	0.982757	17.4954	83.465	H	APSDDGSLKSSSPTSHWKPLAPDPSDDEHDP	SSSPTSH(0.983)WK(0.982)PLAPDPSDDEH(0.035)DPVDSISRPR	1.59085e+08	1.10121e+07	0	173675771	1.77994e+07	0	1.61337e+08	9.89426e+06	0	1.02112e+08	1.92916e+07	0	9.17318e+07	1.72481e+07	0	1.04307e+08	1.66774e+07	0	184940552	0	0	1.20969e+08	0	0	1.1785e+08	2.4961e+07	0	1.7126e+08	2.61545e+07	0	1.53542e+08	17175190	0	1.32605e+08	2.87335e+07	0
Q9JMH9	2020	0.999301	31.4883	83.465	H	TSHWKPLAPDPSDDEHDPVDSISRPRFSHSY	SSSPTSH(0.526)WK(0.474)PLAPDPSDDEH(0.999)DPVDSISRPR	2.22561e+07	5.69331e+07	0	2.00402e+07	7.25e+07	0	2.44256e+07	5.66565e+07	0	3.09487e+07	7.14716e+07	0	3.83957e+07	5.37025e+07	0	3.50406e+07	7.68776e+07	0	0	8.93243e+07	0	0	4.51778e+07	0	0	0	0	4.35419e+07	9.58743e+07	0	2.02652e+07	7.46411e+07	0	4.08912e+07	103212640	0
Q9QUN9	292	0.999344	31.8277	143.64	H	SHSLVYMCKPAFVGSHDHSEESQLPREAPDE	PAFVGSH(0.999)DH(0.001)SEESQLPR	2.36421e+07	0	0	6.58252e+07	0	0	0	0	0	0	0	0	0	0	0	1.68583e+07	0	0	2.54754e+07	0	0	0	0	0	0	0	0	0	0	0	2.8028e+07	0	0	4.98659e+06	0	0
Q9QUN9	294	0.978676	16.6183	83.292	H	SLVYMCKPAFVGSHDHSEESQLPREAPDEYE	PAFVGSH(0.021)DH(0.979)SEESQLPR	0	0	0	0	0	0	0	0	0	1.66566e+07	0	0	0	0	0	0	0	0	0	0	0	0	0	0	0	0	0	0	0	0	0	0	0	0	0	0
Q9QWI6	939	0.973694	15.6837	61.526	H	GLDFEIPPPSPPLNLHELSGPAEGTPLTPKS	GLDFEIPPPSPPLNLH(0.974)ELSGPAEGTPLTPK(0.026)	5.76182e+06	0	0	0	0	0	1.00903e+07	0	0	0	0	0	7.9267e+06	0	0	6.08217e+06	0	0	0	0	0	0	0	0	0	0	0	0	0	0	0	0	0	1.15417e+07	0	0
Q9QWI6	558	0.999056	30.2126	68.238	H	KLADVSAPSGGPPPPHSPYSGPPSRGSPVRQ	LADVSAPSGGPPPPH(0.999)SPYSGPPSR(0.992)GSPVR(0.009)	0	1.38188e+07	0	0	1.06258e+07	0	0	0	0	0	0	0	0	0	0	0	8.79199e+06	0	0	0	0	0	1.34211e+07	0	0	1.57298e+07	0	0	0	0	0	0	0	0	1.81065e+07	0
Q9QWI6	370	1	62.8307	95.891	H	ESSPTRRLNNLSPASHLASSSPPPGLPSGLP	LNNLSPASH(1)LASSSPPPGLPSGLPSGLPSGSPSR(1)	2.27211e+07	3.86483e+07	0	0	2.25307e+07	0	3.07709e+07	0	0	0	1.46329e+07	0	2.87329e+07	2.84857e+07	0	2.2988e+07	1.68243e+07	0	0	2.49602e+07	0	3.63705e+07	3.6679e+07	0	0	1.21713e+07	0	2.03019e+07	0	0	2.56284e+07	1.9802e+07	0	0	2.14567e+07	0
Q9QWI6	414	0.998301	28.083	161.49	H	SYAGGRPPSYAGSPVHHAAERLGGAPTGQGV	LSYAGGRPPSYAGSPVH(0.998)H(0.002)AAER	4.67195e+07	0	0	7.58355e+07	0	0	6.1433e+07	0	0	6.32051e+07	0	0	0	0	0	3.99572e+07	0	0	5.5321e+07	0	0	0	0	0	0	0	0	0	0	0	4.62153e+07	0	0	2.03152e+07	0	0
Q9QWI6	415	0.816771	6.79357	161.49	H	YAGGRPPSYAGSPVHHAAERLGGAPTGQGVS	LSYAGGR(0.004)PPSYAGSPVH(0.171)H(0.817)AAER(0.008)	0	0	0	4.75177e+08	0	0	0	0	0	0	0	0	0	0	0	0	0	0	0	0	0	0	0	0	0	0	0	0	0	0	0	0	0	0	0	0
Q9QX47	2145	0.812588	6.39447	67.194	H	IAQSKEDDDVIVNKPHVSDEEEEEPPFYHHP	EDDDVIVNK(0.186)PH(0.813)VSDEEEEEPPFYHHPFK(0.001)	6.49759e+06	0	0	1.03154e+07	0	0	1.71599e+07	0	0	1.03503e+07	0	0	1.12776e+07	0	0	1.19277e+07	0	0	0	0	0	0	0	0	0	0	0	0	0	0	2.01364e+07	0	0	0	0	0
Q9QXW9	15	0.999998	59.8113	97.059	H	_MEKGARQRNNTAKNHPGSDTSPEAEASSGG	NH(1)PGSDTSPEAEASSGGGGVALKK	0	0	0	1.04896e+07	0	0	0	0	0	0	0	0	0	0	0	0	0	0	0	0	0	0	0	0	0	0	0	0	0	0	0	0	0	0	0	0
Q9QXZ0	4618	0.927025	11.0392	128.55	H	ILTGPGDMSPSASQVHKDLQSISQKWVELTD	RQQHEQLNEAAQGILTGPGDMSPSASQVH(0.927)K(0.073)	9.13133e+06	0	0	63767998	0	0	5.92642e+07	0	0	1.07573e+07	0	0	9.39757e+07	0	0	7.46801e+07	0	0	0	0	0	1.85749e+07	0	0	9.0399e+06	0	0	7.78358e+07	0	0	2.1719e+07	0	0	5.23446e+07	0	0
Q9QY01	546	0.76009	5.21801	81.105	H	TLTDIYQNKQKLRKQHSDPVCPSHAGAGYSY	K(0.229)QH(0.76)SDPVCPSH(0.011)AGAGYSYSPQPSRPGSLGTSPTK	3.31665e+07	0	0	1.29545e+07	0	0	3.07142e+07	0	0	2.00506e+07	0	0	1.32849e+07	0	0	1.35026e+07	0	0	0	0	0	0	0	0	0	0	0	0	0	0	1.11507e+07	0	0	0	0	0
Q9QY01	554	0.970788	15.9223	98.76	H	KQKLRKQHSDPVCPSHAGAGYSYSPQPSRPG	K(0.004)QH(0.025)SDPVCPSH(0.971)AGAGYSYSPQPSRPGSLGTSPTK	0	0	0	1.08802e+07	0	0	1.34194e+07	0	0	8.98857e+06	0	0	0	0	0	0	0	0	0	0	0	0	0	0	0	0	0	0	0	0	1.00455e+07	0	0	0	0	0
Q9QY81	1854	0.587304	1.53234	68.303	H	SPLALTPRASPQHSPHYLASSPAAFNTLPSG	ASPQH(0.413)SPH(0.587)YLASSPAAFNTLPSGR	2.52696e+07	0	0	0	0	0	0	0	0	0	0	0	7.72621e+06	0	0	2.02459e+07	0	0	2.50805e+07	0	0	0	0	0	4.69056e+07	0	0	3.18374e+07	0	0	1.95361e+07	0	0	7.923e+06	0	0
Q9QYC0	419	1	57.4316	131.64	H	SKKYSDVEVPASVTGHSFASDGDSGTCSPLR	YSDVEVPASVTGH(1)SFASDGDSGTCSPLR(1)	7.07339e+07	3.39532e+07	0	1.45829e+08	3.11701e+07	0	7.40758e+07	4.34517e+07	0	6.80939e+07	2.49549e+07	0	1.1808e+08	0	0	7.3409e+07	3.159e+07	0	8.11033e+07	4.24132e+07	0	9.58087e+07	3.52387e+07	0	98828785	0	0	7.53075e+07	2.00839e+07	0	7.71137e+07	4.62079e+07	0	1.03739e+08	2.53346e+07	0
Q9QYI5	247	0.950763	12.8586	98.667	H	GVMQVRPTSLSRPPDHDLSEDEDLQLAMAYS	PTSLSR(0.049)PPDH(0.951)DLSEDEDLQLAMAYSLSEMEAAGQKPAGGR	1.09706e+08	0	0	0	0	0	7.0971e+07	0	0	0	0	0	0	0	0	9.13165e+07	0	0	0	0	0	1.07308e+08	0	0	0	0	0	5.1748e+07	0	0	1.45283e+08	0	0	7.67807e+07	0	0
Q9QYR6	1998	1	98.3277	109.45	H	SAEKELSSAVSPPNLHSDTPTFSYASLAGPT	ELSSAVSPPNLH(1)SDTPTFSYASLAGPTIPPR	3.09037e+07	0	0	0	0	0	1.43078e+07	0	0	9.68918e+06	0	0	1.44876e+07	0	0	1.73479e+07	0	0	1.8098e+07	0	0	1.333e+07	0	0	1.27951e+07	0	0	0	0	0	3.70234e+07	0	0	1.74332e+07	0	0
Q9QYR6	1288	0.838573	7.15564	132.83	H	PGSSFSHSALSGDRKHSPGEITGPGGHFMTS	K(0.161)H(0.839)SPGEITGPGGHFMTSDSSLTK	7.29828e+06	0	0	0	0	0	2.03095e+08	0	0	0	0	0	1.1675e+07	0	0	18945828	0	0	4.44568e+08	0	0	0	0	0	3.00692e+08	0	0	1.98921e+08	0	0	0	0	0	4.17958e+08	0	0
Q9QYR6	1299	0.838311	8.549	79.359	H	GDRKHSPGEITGPGGHFMTSDSSLTKSPESL	H(0.027)SPGEITGPGGH(0.838)FMTSDSSLTK(0.117)SPESLSSPAMEDLAMEWGGK(0.017)	1.15027e+08	0	0	0	0	0	0	0	0	36662629	0	0	0	0	0	0	0	0	9.76984e+07	0	0	6.10392e+07	0	0	0	0	0	8.6784e+07	0	0	7.28804e+07	0	0	0	0	0
Q9QYR6	1002	0.99999	52.8226	106.73	H	VKMASPPPSGPPSAAHTPFHQSPVEEKSEPQ	MASPPPSGPPSAAH(1)TPFHQSPVEEK	2.14665e+08	7.24707e+06	0	2.91737e+08	2.74939e+08	0	2.9565e+07	2.89189e+08	0	1.77496e+08	2.85885e+08	0	4.0066e+07	135892314	0	176477305	1.18448e+08	0	2.20094e+08	1.70592e+08	0	3.35631e+08	2.65265e+08	0	3.14732e+08	2.41844e+08	0	3.01067e+08	0	0	3.37196e+08	2.43853e+08	0	2.57788e+08	2.06038e+08	0
Q9QYR6	1006	0.977293	18.8307	72.927	H	SPPPSGPPSAAHTPFHQSPVEEKSEPQDFQE	MASPPPSGPPSAAH(0.01)TPFH(0.977)QSPVEEK(0.013)	0	2.16921e+07	0	1.48529e+07	2.16352e+07	0	1.49584e+07	0	0	0	2.65476e+07	0	0	4.92391e+07	0	0	3.54124e+07	0	0	0	0	0	9.72575e+07	0	1.63251e+07	5.11323e+07	0	0	3.0417e+08	0	0	2.49089e+07	0	0	6.2727e+07	0
Q9QYX7	4355	0.999999	63.3299	81.316	H	RGYDRDIAFIMDDFQHAMSDSEAYHLRREET	DIAFIMDDFQH(1)AMSDSEAYHLR	4.33351e+07	0	0	2.9779e+07	0	0	2.46291e+07	0	0	2.12063e+07	0	0	2.60957e+07	0	0	2.47678e+07	0	0	0	0	0	5.13655e+07	0	0	0	0	0	3.33217e+07	0	0	4.60165e+07	0	0	3.13453e+07	0	0
Q9QYX7	4324	1	82.2851	121.68	H	LPPISADTRDQFGSSHSLPEVQQHMREESRT	DQFGSSH(1)SLPEVQQHMR	3.11632e+07	0	0	4.48716e+07	0	0	2.75908e+07	0	0	2.05752e+07	0	0	3.07353e+07	0	0	2.41862e+07	0	0	2.83155e+07	0	0	4.11485e+07	0	0	0	0	0	3.52782e+07	0	0	7.38427e+07	0	0	4.44572e+07	0	0
Q9QYX7	4579	0.965938	14.5445	76.152	H	SPLVMSSVVEKGAHAHSGPTSAGSSSVPSPG	GAH(0.034)AH(0.966)SGPTSAGSSSVPSPGQPGSPSVSK	1.15484e+07	0	0	0	0	0	1.89031e+07	0	0	8.72155e+06	0	0	1.28769e+07	0	0	1.33927e+07	0	0	1.33816e+07	0	0	1.51308e+07	0	0	0	0	0	1.06435e+07	0	0	2.0444e+07	0	0	1.15308e+07	0	0
Q9QYX7	1682	0.768411	5.20877	98.552	H	TSVSSLDEDSDSSPSHKKGESKQQRKARHRS	SRGEGSSSLHASSFTPGTSPTSVSSLDEDSDSSPSH(0.768)K(0.232)	2.35161e+07	0	0	3.20314e+07	0	0	3.68747e+07	0	0	3.24693e+07	0	0	8.4437e+06	0	0	6.29912e+06	0	0	5.4912e+07	0	0	1.08123e+07	0	0	1.4641e+07	0	0	0	0	0	3.6855e+07	0	0	3.87846e+07	0	0
Q9QZN4	281	1	78.1888	215.72	H	TVVIGRRRRASDSNTHEGFFWQGLWQRLRR_	ASDSNTH(1)EGFFWQGLWQR	1.26798e+07	0	0	3.10138e+07	0	0	2.34873e+07	0	0	1.49729e+07	0	0	3.62072e+07	0	0	3.33678e+07	0	0	2.5093e+07	0	0	2.10853e+07	0	0	2.25624e+07	0	0	2.70295e+07	0	0	3.30359e+07	0	0	3.44687e+07	0	0
Q9R078	188	0.993787	22.0433	80.786	H	CSDVSELSSSPPGPYHQEPYMSKPEERFKAP	CSDVSELSSSPPGPYH(0.994)QEPYMSK(0.006)PEER	0	0	0	1.31996e+07	0	0	9.90619e+06	0	0	7.43298e+06	0	0	6.35497e+06	0	0	0	0	0	0	0	0	0	0	0	0	0	0	0	0	0	1.4068e+07	0	0	0	0	0
Q9R0N7	128	0.99613	24.1057	110.9	H	SEMLMLSPGSEEDEAHEGCSRENLGRIQFSV	SSVSDLVNSLTSEMLMLSPGSEEDEAH(0.996)EGCSR(0.004)	1.2158e+08	0	0	1.51517e+08	0	0	1.31951e+08	0	0	1.16717e+08	0	0	1.46712e+08	0	0	1.93346e+08	0	0	2.26562e+08	0	0	147906509	0	0	199476214	0	0	1.15461e+08	0	0	1.55151e+08	0	0	1.65642e+08	0	0
Q9WTK7	27	0.820463	6.59905	47.281	H	FSEGELMSVGMDTFIHRIDSTEVIYQPRRKR	MDVADPEPLGLFSEGELMSVGMDTFIH(0.82)R(0.18)	0	0	0	5.04043e+07	0	0	2.67881e+07	0	0	6.17352e+07	0	0	0	0	0	4.00252e+07	0	0	0	0	0	0	0	0	0	0	0	4.45915e+07	0	0	7.91544e+07	0	0	8.98864e+07	0	0
Q9WTQ5	723	0.671439	3.26627	48.887	H	EADALPASTQEQDQAHGSSSPEPAGSPSEGE	DK(0.011)EADALPASTQEQDQAH(0.671)GSSSPEPAGSPSEGEGVSTWESFK(0.317)R(0.001)	0	0	0	0	0	0	0	0	0	0	0	0	0	0	0	0	0	0	0	0	0	0	0	0	0	0	0	0	0	0	0	0	0	9.68049e+06	0	0
Q9WU22	490	0.519165	0.341449	51.234	H	WNQIHFSNSQQDLVTHTNESFDVPSSPEKST	K(0.001)NSWNQIHFSNSQQDLVTH(0.519)TNESFDVPSSPEK(0.48)	1.15892e+07	0	0	0	0	0	0	0	0	0	0	0	0	0	0	2.34667e+07	0	0	0	0	0	2.15301e+07	0	0	0	0	0	4.58457e+07	0	0	0	0	0	6.27347e+06	0	0
Q9Z0H8	314	1	76.4346	104.38	H	AKKTKRMAMGVSALTHSPSSSSISSVSSVAS	MAMGVSALTH(1)SPSSSSISSVSSVASSVGGRPSR	1.27746e+07	0	0	3.77773e+07	0	0	1.46566e+07	0	0	1.15042e+07	0	0	1.10866e+07	0	0	28312316	0	0	3.29417e+07	0	0	1.99619e+07	0	0	1.15546e+07	0	0	1.04333e+07	0	0	1.02101e+07	0	0	0	0	0
Q9Z0U1	112	0.957775	13.5868	103.6	H	RKVQVAPLQGSPPLSHDDRGFEVIEEFDGRS	K(0.042)VQVAPLQGSPPLSH(0.958)DDR	0	0	0	0	0	0	8.2405e+06	0	0	0	0	0	1.49641e+07	0	0	0	0	0	0	0	0	0	0	0	0	0	0	0	0	0	0	0	0	2.9122e+07	0	0
Q9Z1B3	985	0.999503	34.1531	117.52	H	AKKDSKKKSEPSSPDHGSSAIEQDLAALDAE	KKSEPSSPDH(1)GSSAIEQDLAALDAEMTQK	6.07542e+07	0	0	5.38619e+07	0	0	8.11007e+07	0	0	0	0	0	2.12325e+07	0	0	0	0	0	7.88906e+07	0	0	1.44737e+08	0	0	4.44584e+07	0	0	6.0594e+07	0	0	0	0	0	0	0	0
Q9Z1K6	98	1	72.3908	78.401	H	LKVSHSVAKLILVNFHWQVSEILDRYRSNSA	LILVNFH(1)WQVSEILDR	0	0	0	1.85276e+07	0	0	5.42329e+06	0	0	0	0	0	4.28035e+07	0	0	1.873e+07	0	0	0	0	0	0	0	0	0	0	0	0	0	0	8.81885e+06	0	0	1.21964e+07	0	0
Q9Z2C4	45	0.999943	42.4595	82.01	H	WRPSRVAGGASASSRHPSIETLDSPTGSHVE	H(1)PSIETLDSPTGSHVEWCK	1.00274e+07	0	0	2.66987e+07	0	0	1.75602e+07	0	0	1.00558e+07	0	0	1.67993e+07	0	0	1.2913e+07	0	0	1.50247e+07	0	0	9.66972e+06	0	0	1.55604e+07	0	0	4.15924e+07	0	0	5.65535e+07	0	0	2.96915e+07	0	0
Q9Z2H2	247	0.909072	11.8527	95.51	H	SVYGVTDETQSQSPVHIPSQPIRKTTKDDIR	K(0.027)SVYGVTDETQSQSPVH(0.909)IPSQPIR(0.004)K(0.059)	0	0	0	0	0	0	4.93565e+07	0	0	1.4189e+07	0	0	0	0	0	0	0	0	9.99565e+06	0	0	3.38251e+07	0	0	3.4277e+07	0	0	2.99234e+07	0	0	0	0	0	0	0	0
Q9Z329	83	0.99975	36.0212	78.264	H	AQKQYWKAKQAKQGNHTEAALLKKLQHAAEL	QGNH(1)TEAALLK	0	0	0	0	0	0	5.80777e+06	0	0	0	0	0	2.02264e+06	0	0	0	0	0	1.6885e+07	0	0	3.35925e+06	0	0	4.2455e+06	0	0	0	0	0	0	0	0	0	0	0
A1L3P4	698	0.822737	6.66643	80.733	R	PMDDSEPALNSLDDTRHSPA___________	LVLPMDDSEPALNSLDDTR(0.823)H(0.177)SPA	0	0	0	1.16746e+07	0	0	6.57332e+06	0	0	0	0	0	0	0	0	8.81957e+06	0	0	0	0	0	8.81406e+06	0	0	1.26873e+07	0	0	0	0	0	3.19135e+07	0	0	1.945e+07	0	0
A2A690	1503	0.394487	0	49.001	R	STSPALSPTHQNSHYRPSPPHTSPAHQGASY	QGYQSTSPALSPTH(0.179)QNSH(0.394)YR(0.394)PSPPH(0.032)TSPAHQGASYR	0	0	0	0	0	0	0	0	0	0	0	0	0	0	0	0	0	0	0	0	0	0	0	0	0	0	0	0	0	0	0	0	0	0	0	0
A2AQ25	299	0.633948	4.93939	74.146	R	QREIVYARGDGLVAPRPGSVAHPPHVIPNSP	GDGLVAPR(0.634)PGSVAH(0.203)PPH(0.162)VIPNSPPSTPVPH(0.001)SLPPSPSR	0	0	0	7.63381e+06	0	0	4.81723e+07	0	0	1.12527e+07	0	0	0	0	0	0	0	0	1.0639e+08	0	0	1.24608e+08	0	0	1.3115e+07	0	0	9.12582e+07	0	0	1.04693e+07	0	0	1.58367e+07	0	0
A2ARS0	290	0.921021	10.6676	147.62	R	TEEETARLRAGALMARPNSPQSSGSGRWRSQ	AGALMAR(0.921)PNSPQSSGSGR(0.079)	0	0	0	0	0	0	0	0	0	0	0	0	0	0	0	0	0	0	0	0	0	0	0	0	0	0	0	0	0	0	0	0	0	0	0	0
A2ARS0	224	0.958137	15.7245	50.505	R	PSPRRLPRPLLARFARAAGGHGHGHGHGHGH	FAR(0.958)AAGGH(0.958)GH(0.73)GH(0.266)GH(0.037)GH(0.016)GH(0.034)GGELASAGK(0.001)GSVR	0	0	8.60958e+06	0	0	8.5344e+06	0	0	3.97e+06	0	0	5.16914e+06	0	0	0	0	0	7.3375e+06	0	0	1.35439e+07	0	0	1.38145e+07	0	0	1.54253e+07	0	0	0	0	0	1.12475e+07	0	0	5.91223e+06
A2AX52	1083	1	53.6152	53.615	R	QIGLLQFSSNPQEEFRLNRYSSKVDMCRAIL	MVNQSNIGADEIQIGLLQFSSNPQEEFR(1)LNR(1)YSSK(1)	0	0	3.00187e+07	0	0	2.26295e+07	0	0	1.62746e+07	0	0	1.8664e+07	0	0	0	0	0	3.49327e+07	0	0	4.43501e+07	0	0	6.2137e+07	0	0	1.46611e+07	0	0	0	0	0	0	0	0	1.92882e+07
A2AX52	1086	1	53.6152	53.615	R	LLQFSSNPQEEFRLNRYSSKVDMCRAILSVQ	MVNQSNIGADEIQIGLLQFSSNPQEEFR(1)LNR(1)YSSK(1)	0	0	3.00187e+07	0	0	2.26295e+07	0	0	1.62746e+07	0	0	1.8664e+07	0	0	0	0	0	3.49327e+07	0	0	4.43501e+07	0	0	6.2137e+07	0	0	1.46611e+07	0	0	0	0	0	0	0	0	1.92882e+07
A2RSQ0	52	0.812389	6.36513	59.189	R	EPDELAGENFDQSPLRRTFKSKVLAHYPQNI	FAHYFVLCGIDADSGLEPDELAGENFDQSPLR(0.812)R(0.188)	3.21527e+07	0	0	4.02196e+07	0	0	5.82491e+07	0	0	0	0	0	0	0	0	3.27742e+07	0	0	4.52227e+07	0	0	7.90465e+07	0	0	0	0	0	0	0	0	3.2023e+07	0	0	2.67121e+07	0	0
A4Q9F1	12	0.995637	26.9307	53.768	R	____MSCPPTPNPPFRPPSHTRVLRTPPLPP	MSCPPTPNPPFR(0.996)PPSH(0.967)TR(0.027)VLR(0.01)	0	3.65682e+06	0	0	6.93069e+06	0	0	0	0	0	0	0	0	1.0473e+07	0	0	0	0	0	2.2444e+07	0	0	0	0	0	0	0	0	1.6773e+07	0	0	1.84368e+07	0	0	7.35799e+06	0
A8C756	1195	1	78.0046	88.056	R	RELISLALSADDSKGRVPQVHALNILRALFR	GR(1)VPQVH(1)ALNILR(0.034)ALFR(0.966)	0	0	0	0	0	0	0	0	0	0	0	0	0	0	0	0	0	0	0	0	0	0	0	0	0	0	0	0	0	0	0	0	0	0	0	0
B1ATG9	141	0.999971	44.266	73.404	R	DYVKLMIPSWMTPAQRGKGLYADYLFNAIAG	H(0.766)LDYVK(0.234)LMIPSWMTPAQR(1)GK(1)	0	0	0	0	0	3.16984e+07	0	0	0	0	0	0	0	0	0	0	0	0	0	0	0	0	0	0	0	0	0	0	0	0	0	0	0	0	0	0
B2RUJ5	245	0.996819	27.421	126.26	R	YRQEALGARLHHYDERSDGESDSPEKEAEFA	LHH(0.002)YDER(0.997)SDGESDSPEK(0.001)EAEFAPYPR	0	0	0	1.28533e+07	0	0	9.92631e+06	0	0	1.13772e+07	0	0	9.8741e+06	0	0	1.4451e+07	0	0	0	0	0	0	0	0	0	0	0	0	0	0	0	0	0	0	0	0
B2RY71	627	0.547265	0	63.918	R	FLCKIQGTSSIHIILRDKMLSQIKMVKTSEI	IQGTSSIH(0.547)IILR(0.547)DK(0.909)MLSQIK(0.997)	0	0	0	0	0	0	0	0	0	0	0	0	0	0	0	0	0	0	0	0	0	0	0	1.21597e+07	0	0	0	0	0	0	0	0	0	0	0	0
D3YUB6	988	0.998901	29.5868	181.78	R	LACDTSGPEVSQIPCRPQPQSPLGSQEKKRL	QRPHESPCTLACDTSGPEVSQIPCR(0.999)PQPQSPLGSQEK(0.001)	1.72572e+07	0	0	2.11427e+07	0	0	1.84388e+07	0	0	0	0	0	1.20209e+07	0	0	1.576e+07	0	0	0	0	0	3.22184e+07	0	0	5.90396e+06	0	0	8.48026e+06	0	0	4.39862e+07	0	0	9.27188e+06	0	0
D3YWQ0	1028	0.908406	9.96412	89.311	R	NRAVCQLLVDAGASLRQTDSKGKTPQERAQQ	AVCQLLVDAGASLR(0.908)QTDSK(0.092)	0	0	0	8.92654e+06	0	0	7773211	0	0	9.50115e+06	0	0	1.03041e+07	0	0	0	0	0	1.19632e+07	0	0	7.14576e+06	0	0	1.22495e+07	0	0	1.33954e+07	0	0	1.11917e+07	0	0	0	0	0
E9PZ19	1200	0.995559	23.5446	73.839	R	RRAEPSLHQVVLQPSRLSPLTQSPLSSRTGS	RAEPSLHQVVLQPSR(0.996)LSPLTQSPLSSR(0.004)	9.09673e+06	0	0	3.97606e+07	0	0	1.96574e+07	0	0	0	0	0	1.13747e+07	0	0	1.78226e+07	0	0	1.72374e+07	0	0	1.80905e+07	0	0	1.08283e+07	0	0	0	0	0	1.03337e+07	0	0	0	0	0
E9Q0S6	517	0.499704	0	78.607	R	DPLIRWDSYDNFSGHREDGMEEVVGHTQGPL	WDSYDNFSGH(0.5)R(0.5)EDGMEEVVGHTQGPLDGSLYAK	0	0	0	0	0	0	0	0	0	0	0	0	0	0	0	0	0	0	0	0	0	0	0	0	0	0	0	0	0	0	0	0	0	0	0	0
E9Q401	2805	1	81.3205	103.73	R	RTREGDSMALYNRTRRISQTSQVSIDAAHGY	R(1)ISQTSQVSIDAAHGYSPR	8.2366e+06	0	0	2.18662e+07	0	0	1.85625e+07	0	0	0	0	0	1.02658e+07	0	0	0	0	0	0	0	0	0	0	0	0	0	0	0	0	0	0	0	0	0	0	0
E9Q4J9	112	0.479858	0	66.799	R	SVQSSDSTIRTHMFHRELKTIMDTLMEKCPK	THMFH(0.48)R(0.48)ELK(0.04)	0	0	0	0	0	0	0	0	0	0	0	0	0	0	0	0	0	0	0	0	0	0	0	0	0	0	0	0	0	0	0	0	0	0	0	0
E9Q5C9	641	0.995895	23.9447	131.12	R	SPFRRVREEEIEVDSRVADNSFDAKRGAAGD	EEEIEVDSR(0.996)VADNSFDAK(0.004)R	0	0	0	5.99447e+07	0	0	4.01613e+07	0	0	6.36816e+07	0	0	4.52972e+07	0	0	3.85032e+07	0	0	4.95159e+07	0	0	0	0	0	0	0	0	5.49708e+07	0	0	0	0	0	0	0	0
E9Q7E2	572	1	77.3868	77.387	R	ARGGILTSTGFYKCLRTVFPNHTVKRVEDST	CLR(1)TVFPNH(1)TVK(1)	0	0	0	0	0	7.54628e+06	0	0	8.12647e+06	0	0	6.77813e+06	0	0	0	0	0	0	0	0	9.20987e+06	0	0	0	0	0	1.28579e+07	0	0	5.85835e+06	0	0	0	0	0	0
E9QAG8	94	0.880102	7.53115	49.638	R	IQYGEAFVHHSSLQMRKIIHTGEKRYKCNQC	PYEGIQYGEAFVH(0.899)H(0.899)SSLQMR(0.88)K(0.879)IIH(0.402)TGEK(0.041)	0	0	0	0	0	6.18805e+06	0	0	54972178	0	0	6.71649e+06	0	0	0	0	0	0	0	0	3.78772e+07	0	0	1.22565e+07	0	0	0	0	0	1.25105e+07	0	0	0	0	0	2.98123e+07
E9QAT4	1382	1	73.4436	168.85	R	HSARSLRSTHSLPSRRSSLSSHSHQSQIYRS	R(1)SSLSSHSHQSQIYR	0	0	0	7.39293e+06	0	0	0	0	0	0	0	0	3.14746e+06	0	0	0	0	0	3.76287e+06	0	0	0	0	0	8.39597e+06	0	0	0	0	0	4.08612e+06	0	0	0	0	0
G3X9K3	1540	0.95906	14.9617	104.84	R	LDIFKTTIPHALLTWRPTSGEAEPPSPSAVS	TTIPH(0.031)ALLTWR(0.959)PTSGEAEPPSPSAVSEK(0.008)PLDAISQK(0.002)	1.80253e+08	0	0	0	0	0	1.20488e+08	0	0	0	0	0	1.33795e+08	0	0	2.3014e+08	0	0	5.46833e+07	0	0	1.40918e+08	0	0	0	0	0	1.31937e+08	0	0	1.63984e+08	0	0	1.29757e+08	0	0
O08582	7	1	72.4888	111.33	R	_________MAAERSRSPVDSPVPASMFAPE	SR(1)SPVDSPVPASMFAPEPSSPGAAR(1)	0	0	0	1.14645e+07	2.06649e+07	0	1.4556e+07	2.07201e+07	0	1.23362e+07	1.39976e+07	0	9.49386e+06	1.67438e+07	0	17285982	1.42121e+07	0	0	0	0	2.22165e+07	1.28762e+07	0	1.70034e+07	2.73193e+07	0	0	2.24701e+07	0	8.20292e+06	0	0	1.12553e+07	0	0
O35219	1138	1	104.988	148.78	R	LPAGAPELPQDGPTRRLSLPGQLGALTSQPL	R(1)LSLPGQLGALTSQPLHR	3.14773e+07	0	0	5.64411e+07	0	0	5.1889e+07	0	0	5.73392e+07	0	0	1.28818e+07	0	0	3.91238e+07	0	0	5.47662e+07	0	0	4.41207e+07	0	0	8.93624e+07	0	0	7.31415e+07	0	0	8.49338e+07	0	0	7.07839e+07	0	0
O35607	857	0.999984	49.8158	72.474	R	RSQEMLQNQFIGEDTRLNINSSPDEHEPLLR	SQEMLQNQFIGEDTR(1)LNINSSPDEHEPLLRR	0	0	0	0	0	0	0	0	0	0	0	0	0	0	0	2.74539e+07	0	0	0	0	0	0	0	0	0	0	0	0	0	0	0	0	0	0	0	0
O35927	699	0.581432	4.31633	59.991	R	IIPHSGWENSPLQDDRKIQLHSSQVLRNATG	MPIIQDALAVLTNAVIIPH(0.203)SGWENSPLQDDR(0.581)K(0.215)	0	0	0	0	0	0	0	0	0	1.2993e+06	0	0	1.86107e+06	0	0	0	0	0	0	0	0	0	0	0	0	0	0	0	0	0	0	0	0	0	0	0
O54916	551	0.99747	28.2239	117.48	R	SGTSPDNTAPPPPPPRPQPSHSRSSSLDMNR	SH(0.001)SGTSPDNTAPPPPPPR(0.997)PQPSH(0.002)SR	7.92106e+06	0	0	0	0	0	6.351e+06	0	0	0	0	0	5.25634e+06	0	0	5.36077e+06	0	0	0	0	0	0	0	0	0	0	0	0	0	0	0	0	0	0	0	0
O54988	187	1	84.3862	183.73	R	ADFGVSAKNTRTIQRRDSFIGTPYWMAPEVV	R(1)DSFIGTPYWMAPEVVMCETSK	0	0	0	0	0	0	0	0	0	0	0	0	0	0	0	6.78428e+06	0	0	1.90552e+07	0	0	2.34231e+07	0	0	2.46915e+07	0	0	1.7229e+07	0	0	0	0	0	6.41842e+06	0	0
O55047	174	1	84.1883	84.188	R	TEHSCSSQKQISIQHRQTQSDLTIEKISALE	QISIQH(1)R(1)QTQSDLTIEK(1)	0	0	0	0	0	0	0	0	0	0	0	0	0	0	0	0	0	0	0	0	0	0	0	0	0	0	0	0	0	0	0	0	0	0	0	0
O70252	104	0.921519	10.3096	56.225	R	DHPAFAPLYFPTELHRKAALIKDMKYFFGEN	DH(1)PAFAPLYFPTELH(0.922)R(0.922)K(0.157)	0	0	1.38333e+07	0	0	6.52307e+06	0	0	1.35424e+07	0	0	4.37486e+07	0	0	2.44662e+06	0	0	4.37246e+07	0	0	6.66074e+06	0	0	2.1315e+07	0	0	2.41234e+07	0	0	2.87786e+07	0	0	0	0	0	5.39612e+06
O70318	393	0.998093	27.2324	87.863	R	LSPAQADSQFLENAKRLSMYGVDLHHAKDSE	R(0.998)LSMYGVDLHHAK(0.002)	0	0	0	0	0	0	0	0	0	6.74388e+07	0	0	3.1437e+06	0	0	3.38505e+06	0	0	9.82828e+06	0	0	0	0	0	0	0	0	9.1386e+07	0	0	8.08078e+07	0	0	0	0	0
O70318	539	0.999997	55.0541	56.952	R	LIDRPAPQFERASSKRVSRSLDGAPIGVVDQ	R(1)VSR(1)SLDGAPIGVVDQSPPGEGSVPGPGVISYTTIQDGR	0	8.43935e+06	0	0	1.38524e+07	0	0	9.22426e+06	0	0	0	0	0	2.30374e+07	0	0	2.99672e+07	0	0	0	0	0	1.31586e+07	0	0	3.89214e+07	0	0	2.57533e+07	0	0	1.49952e+07	0	0	2.9122e+07	0
O70318	542	0.999997	55.8134	56.952	R	RPAPQFERASSKRVSRSLDGAPIGVVDQSPP	R(1)VSR(1)SLDGAPIGVVDQSPPGEGSVPGPGVISYTTIQDGR	0	8.43935e+06	0	0	1.38524e+07	0	0	9.22426e+06	0	0	0	0	0	2.30374e+07	0	0	2.99672e+07	0	0	0	0	0	1.31586e+07	0	0	3.89214e+07	0	0	2.57533e+07	0	0	1.49952e+07	0	0	2.9122e+07	0
O88196	1058	0.999999	63.0426	67.902	R	VAPSSEAVTPEDHSRRNSDSAGPFAVPDHLR	R(1)NSDSAGPFAVPDHLR	0	0	0	1.3058e+07	0	0	0	0	0	0	0	0	1.81807e+07	0	0	0	0	0	0	0	0	1.86734e+07	0	0	1.03319e+07	0	0	1.67695e+07	0	0	0	0	0	2.69752e+07	0	0
O88444	548	1	93.4405	130.21	R	DKRRALRTASEKLRNRSSFSTNVVYTTPGTR	NR(1)SSFSTNVVYTTPGTR	4.11934e+07	0	0	3.78497e+07	0	0	4.16072e+07	0	0	3.19498e+07	0	0	4.16636e+06	0	0	0	0	0	3.14144e+07	0	0	2.11724e+07	0	0	2.9266e+07	0	0	3.64599e+07	0	0	3.10011e+07	0	0	3.90385e+07	0	0
O88452	115	0.945359	9.11195	72.928	R	KSFIKDALRCKAHALRHKFGCISRKCPAIRE	AH(0.945)ALR(0.945)H(0.555)K(0.555)FGCISR	0	0	0	0	0	3.22898e+06	0	0	2.7514e+06	0	0	0	0	0	5.21873e+06	0	0	0	0	0	0	0	0	3.13577e+06	0	0	0	0	0	9.14499e+06	0	0	0	0	0	0
O88602	292	0.99952	33.3048	76.156	R	PLKAATTPTATYNSDRDNSFLQVHNCIQKDS	AATTPTATYNSDR(1)DNSFLQVHNCIQK	1.16951e+07	0	0	1.72485e+07	0	0	1.12104e+07	0	0	7.72825e+06	0	0	1.07121e+07	0	0	7.43403e+06	0	0	8.72364e+06	0	0	1.13069e+07	0	0	0	0	0	0	0	0	0	0	0	4.64066e+06	0	0
O88703	790	0.999996	54.4726	98.572	R	RVGPALPARRLSRASRPLSASQPSLPHGVPA	ASR(1)PLSASQPSLPHGVPAPSPAASAR	0	0	0	5.55238e+07	0	0	5.15163e+07	0	0	1.45076e+08	0	0	1.69649e+08	0	0	1.15859e+07	0	0	2.54078e+07	0	0	5.18024e+07	0	0	1.54188e+07	0	0	1.4487e+08	0	0	9.87568e+07	0	0	0	0	0
O88703	732	1	45.9421	86.777	R	PLVGPLALGSPRLVRRAPPGPLPPAASPGPP	R(1)APPGPLPPAASPGPPAASPPAAPSSPR(1)	0	0	0	0	4.51524e+06	0	0	0	0	0	0	0	0	1.9975e+07	0	0	1.99981e+07	0	0	1.53333e+07	0	0	1.36215e+07	0	0	1.07454e+07	0	0	3.06471e+07	0	0	0	0	0	0	0
O88705	557	0.5	0	78.057	R	RLRRIGKKNSILQRKRSEPSPGSSGGVMEQH	K(0.5)R(0.5)SEPSPGSSGGVMEQHLVQHDR	0	0	0	1.9224e+07	0	0	1.29074e+07	0	0	3.00833e+07	0	0	0	0	0	2.18878e+07	0	0	1.49226e+07	0	0	0	0	0	0	0	0	0	0	0	0	0	0	0	0	0
O88737	776	0.40374	0	67.758	R	KPPRSSSSAVEDQKRRPHSLSITPEAFDSDE	R(0.193)R(0.404)PH(0.404)SLSITPEAFDSDEELGDILEEDDSLAWGR	0	0	0	0	0	0	0	0	0	0	0	0	0	0	0	0	0	0	0	0	0	0	0	0	0	0	0	0	0	0	0	0	0	0	0	0
O88737	145	0.999899	39.9582	66.413	R	SRTQRSGRSPSVSPDRGSTPTSPYSVPQIAP	SPSVSPDR(1)GSTPTSPYSVPQIAPLPSSTLCPICK	2.48641e+07	0	0	2.33017e+07	0	0	2.68321e+07	0	0	0	0	0	2.00942e+07	0	0	0	0	0	0	0	0	0	0	0	0	0	0	0	0	0	0	0	0	7.06647e+06	0	0
O88935	430	0.999978	46.5503	209.22	R	TQALPRQPQRDASPGRGSHSQSSSPGALTLG	DASPGR(1)GSHSQSSSPGALTLGR	109498430	0	0	1.53454e+08	0	0	1.63245e+08	0	0	2.03692e+08	0	0	1.95312e+08	0	0	1.47617e+08	0	0	2.49732e+08	0	0	2.38469e+08	0	0	148133585	0	0	3.46845e+08	0	0	1.86565e+08	0	0	9.64489e+07	0	0
O88935	547	1	55.8995	158.25	R	QSRPVAGGPGAPPAARPPASPSPQRQAGAPQ	PVAGGPGAPPAAR(1)PPASPSPQR(1)	3.33394e+07	8.20477e+06	0	5.21315e+07	4.80024e+07	0	2.26206e+07	1.68812e+07	0	2.94771e+07	1.37503e+07	0	4.28484e+07	1.25627e+07	0	4.39704e+07	2.00451e+07	0	2.84301e+07	1.04297e+07	0	0	1.6056e+07	0	2.81493e+07	3.96026e+07	0	1.41035e+07	1.27563e+07	0	2.93463e+07	2.37113e+07	0	0	1.52029e+07	0
O88935	7	1	75.9101	97.823	R	_________MNYLRRRLSDSNFMANLPNGYM	R(1)LSDSNFMANLPNGYMTDLQR	2.34393e+06	0	0	0	0	0	0	0	0	0	0	0	1.26296e+07	0	0	1.33727e+07	0	0	0	0	0	0	0	0	0	0	0	0	0	0	0	0	0	3.93929e+06	0	0
O88935	680	0.897743	9.43989	104.96	R	QSLTNAFNLPEPAPPRPSLSQDEVKAETIRS	SQSLTNAFNLPEPAPPR(0.898)PSLSQDEVK(0.102)AETIR	0	0	0	0	0	0	0	0	0	0	0	0	2.97945e+06	0	0	5.48199e+06	0	0	0	0	0	0	0	0	0	0	0	0	0	0	0	0	0	1.54838e+07	0	0
O89026	1400	0.992257	22.1068	102.92	R	QDAAGRRHFHASQCPRPTSPVSTDSNMSAVV	H(0.001)FH(0.006)ASQCPR(0.992)PTSPVSTDSNMSAVVIQK	0	0	0	1.44017e+07	0	0	0	0	0	0	0	0	0	0	0	1.44789e+07	0	0	1.09522e+07	0	0	0	0	0	9.78573e+06	0	0	1.65998e+07	0	0	0	0	0	5.49387e+06	0	0
O89084	203	0.779006	5.48261	131.26	R	SNFSLLTNVPIPSNKRSPLGGPPSVCKATLS	SNFSLLTNVPIPSNK(0.22)R(0.779)SPLGGPPSVCK(0.001)	0	0	0	1.13011e+07	0	0	0	0	0	0	0	0	0	0	0	0	0	0	0	0	0	0	0	0	0	0	0	0	0	0	0	0	0	0	0	0
P04370	228	0.982885	17.5914	129	R	DENPVVHFFKNIVTPRTPPPSQGKGGRDSRS	NIVTPR(0.983)TPPPSQGK(0.017)	0	0	0	0	0	0	0	0	0	2.39615e+07	0	0	0	0	0	0	0	0	0	0	0	0	0	0	0	0	0	2.69322e+07	0	0	0	0	0	0	0	0
P04370	210	0.955366	13.3051	140.03	R	RTTHYGSLPQKSQHGRTQDENPVVHFFKNIV	SQH(0.045)GR(0.955)TQDENPVVHFFK	0	0	0	0	0	0	0	0	0	1.68472e+07	0	0	1.72252e+07	0	0	1.1485e+07	0	0	6.40997e+06	0	0	0	0	0	0	0	0	5.09519e+07	0	0	1.45223e+07	0	0	2.54158e+07	0	0
P04919	16	1	123.944	184.68	R	MGDMRDHEEVLEIPDRDSEEELENIIGQIAY	DHEEVLEIPDR(1)DSEEELENIIGQIAYR	3.06816e+07	0	0	1.4793e+07	0	0	6.55789e+07	0	0	4.34549e+07	0	0	1.16782e+07	0	0	5.00872e+07	0	0	3.19262e+07	0	0	4.37545e+07	0	0	1.60491e+08	0	0	5.70197e+07	0	0	7.90576e+07	0	0	9.77877e+07	0	0
P05480	15	0.49998	0	90.778	R	_MGSNKSKPKDASQRRRSLEPSENVHGAGGA	R(0.5)R(0.5)SLEPSENVHGAGGAFPASQTPSK	0	0	0	0	0	0	3.32802e+07	0	0	5.80552e+07	0	0	4.42348e+07	0	0	2.11443e+07	0	0	0	0	0	0	0	0	0	0	0	0	0	0	9.53159e+07	0	0	0	0	0
P05480	16	0.49998	0	90.778	R	MGSNKSKPKDASQRRRSLEPSENVHGAGGAF	R(0.5)R(0.5)SLEPSENVHGAGGAFPASQTPSK	0	0	0	0	0	0	3.32802e+07	0	0	5.80552e+07	0	0	4.42348e+07	0	0	2.11443e+07	0	0	0	0	0	0	0	0	0	0	0	0	0	0	9.53159e+07	0	0	0	0	0
P06803	13	0.995996	25.3101	47.822	R	___MLLSKINSLAHLRAAPCNDLHATKLAPG	MLLSK(0.007)INSLAH(0.997)LR(0.996)AAPCNDLH(0.418)ATK(0.583)	0	0	225688277	0	0	0	0	0	4.80791e+08	0	0	4.88194e+08	0	0	1.59743e+07	0	0	5.90919e+08	0	0	0	0	0	0	0	0	1125308158	0	0	0	0	0	8.5768e+08	0	0	0
P09411	206	0.999919	40.9021	99.238	R	KKELNYFAKALESPERPFLAILGGAKVADKI	ALESPER(1)PFLAILGGAK	2.18554e+07	0	0	1.48397e+07	0	0	1.29842e+07	0	0	1.57362e+07	0	0	1.75883e+07	0	0	2.22795e+07	0	0	5.33001e+07	0	0	0	0	0	3.49304e+07	0	0	0	0	0	4.01819e+07	0	0	2.81329e+07	0	0
P0DW27	21	0.859278	5.12353	70.145	R	VVVTGLAAMEPLIVHRMIVERTAAGTMIIET	MK(0.001)DEVVVVTGLAAMEPLIVH(0.543)R(0.859)MIVER(0.597)	0	0	0	0	0	0	0	0	0	0	0	0	0	0	0	0	0	0	0	0	0	0	0	0	0	0	0	0	0	0	0	0	0	0	0	0
P10636-7	201	0.999999	59.818	146.77	R	LPTPPTREPKKVAVVRTPPKSPSSAKSRLQT	VAVVR(1)TPPKSPSSAK	6986199126	7.33634e+07	0	7.23289e+08	1.53361e+08	0	6355252107	0	0	3112300973	0	0	3477518098	1.02323e+08	0	3284016803	0	0	0	0	0	0	0	0	0	4.97746e+07	0	0	0	0	0	0	0	0	0	0
P10636-7	182	0.991221	20.5286	143.4	R	GYSSPGSPGTPGSRSRTPSLPTPPTREPKKV	SR(0.991)TPSLPTPPTREPK(0.009)	4.4009e+07	0	0	4.83471e+07	0	0	0	0	0	0	0	0	4.08575e+07	0	0	3.65666e+07	0	0	7.94637e+06	0	0	4.16709e+06	0	0	1.09468e+07	0	0	1.08508e+07	0	0	0	0	0	1.58793e+07	0	0
P10637	522	1	71.9205	166.86	R	LPTPPTREPKKVAVVRTPPKSPSASKSRLQT	VAVVR(1)TPPKSPSASK	6720756774	0	0	3.4003e+08	0	0	6051254718	4.4121e+07	0	3112300973	0	0	3592570435	0	0	3284016803	5.62749e+07	0	1264349542	0	0	1247267929	2.21028e+07	0	1126374464	0	0	7.50519e+08	0	0	1000824783	0	0	9.73389e+08	9.89253e+06	0
P11881	1753	1	73.0852	113.54	R	ILVNRYYGNIRPSGRRESLTSFGNGPLSPGG	R(1)ESLTSFGNGPLSPGGPSKPGGGGGGPGSSSTSR	3.52804e+08	0	0	3.77345e+08	0	0	3.525e+08	0	0	1.8828e+08	0	0	1.14971e+08	0	0	1.83013e+08	0	0	3.90816e+08	0	0	3.32014e+08	0	0	2.57981e+08	0	0	7.96183e+07	0	0	2.75119e+08	0	0	7.05502e+07	0	0
P14873	335	0.915883	12.0163	80.585	R	INSMLQRKIAELEEERSQGSTSNSDWMKNLI	K(0.027)IAELEEER(0.916)SQGSTSNSDWMK(0.058)	6.9606e+06	0	0	1.03441e+07	0	0	9.34201e+06	0	0	1.24195e+07	0	0	1.70016e+07	0	0	2.08405e+07	0	0	0	0	0	0	0	0	0	0	0	0	0	0	1.895e+07	0	0	5.51778e+06	0	0
P14873	1436	1	97.8926	182.19	R	ESPFEGKNGKQGFPDRESPVSDLTSTGLYQD	QGFPDR(1)ESPVSDLTSTGLYQDKQEEK	4.93573e+07	0	0	7.14053e+07	0	0	6.13458e+07	0	0	7.56795e+07	0	0	7.75396e+07	0	0	8.60981e+07	0	0	1.04291e+08	0	0	0	0	0	6.73431e+07	0	0	1.02096e+08	0	0	1.13816e+08	0	0	1.76368e+08	0	0
P14873	1394	1	86.7073	191.41	R	VPDSESPVEKVLSPLRSPPLLGSESPYEDFL	VLSPLR(1)SPPLLGSESPYEDFLSADSK(1)	4.63542e+08	0	0	5.46182e+08	1.00111e+08	0	3.96098e+08	7.40698e+07	0	4.03829e+08	1.51386e+08	0	7.09245e+08	166238388	0	535157934	1.68603e+08	0	5.61528e+08	5.2806e+07	0	6.85997e+08	3.52913e+07	0	5.35925e+08	1.25273e+08	0	499547910	7.86454e+07	0	5.97493e+08	0	0	5.56816e+08	1.39593e+08	0
P15388	164	0.999998	56.9219	121.36	R	LEMTKRLALSDSPDGRPGGFWRRWQPRIWAL	LALSDSPDGR(1)PGGFWR	5.86167e+07	0	0	4.42997e+07	0	0	3.38928e+07	0	0	4.8251e+07	0	0	6.50462e+07	0	0	6.53486e+07	0	0	8.39004e+07	0	0	8.37718e+07	0	0	0	0	0	3.78718e+07	0	0	4.48554e+07	0	0	6.60663e+07	0	0
P16014	494	0.995335	23.2916	112.42	R	GRWWQQEEQLGPEESREEVRFPDRQYEPYPI	WWQQEEQLGPEESR(0.995)EEVR(0.005)FPDR	1.06952e+08	0	0	1.36065e+08	0	0	8.6653e+07	0	0	1.76766e+08	0	0	2.30692e+08	0	0	1.48876e+08	0	0	1.23774e+08	0	0	1.53883e+08	0	0	8.5186e+07	0	0	7.73173e+07	0	0	0	0	0	1.78596e+08	0	0
P16546	1032	0.999408	32.2775	146.27	R	PAAYVKKLDPAQSASRENLLEEQGSIALRQG	K(0.001)LDPAQSASR(0.999)ENLLEEQGSIALR	4.36437e+07	0	0	3.45157e+07	0	0	1.83576e+07	0	0	7.44431e+07	0	0	8.71052e+07	0	0	8.26066e+07	0	0	0	0	0	0	0	0	5.60083e+07	0	0	136375919	0	0	3.96092e+08	0	0	1.68551e+07	0	0
P17564	14	0.851382	6.48721	50.255	R	__MAPSPRPQHVLHWRDAHNFYLLSPLMGLL	PQH(0.338)VLH(0.851)WR(0.851)DAH(0.959)NFYLLSPLMGLLSR	0	0	0	0	0	5.13449e+06	0	0	0	0	0	0	0	0	8.22665e+06	0	0	0	0	0	0	0	0	0	0	0	0	0	0	0	0	0	0	0	0	6.67984e+06
P20357	1649	0.999981	47.3925	120.6	R	KSGILVPSEKKVAIIRTPPKSPATPKQLRLI	VAIIR(1)TPPKSPATPK	1720946635	0	0	2547483242	0	0	2298425956	0	0	1265217444	0	0	1438970192	0	0	1274413970	0	0	2024264182	0	0	1895858570	0	0	1512673395	0	0	5.88562e+08	0	0	1.77777e+08	0	0	855062202	0	0
P20917	563	0.454554	0	71.906	R	FSGGDNPHVLYSPEFRISGAPDKYESEKQRL	NVTESSSFSGGDNPH(0.455)VLYSPEFR(0.455)ISGAPDK(0.047)YESEK(0.044)	0	0	0	0	0	0	0	0	0	0	0	0	0	0	0	0	0	0	0	0	0	0	0	0	0	0	0	0	0	0	0	0	0	0	0	0
P21279	92	1	56.1208	56.121	R	KLVYQNIFTAMQAMIRAMDTLKIPYKYEHNK	LVYQNIFTAMQAMIR(1)AMDTLK(1)	0	9.97346e+06	0	0	0	0	0	1.03459e+07	0	0	0	0	0	0	0	0	8.22268e+06	0	0	2.45074e+07	0	0	2.3852e+07	0	0	0	0	0	1.57411e+07	0	0	0	0	0	2.4118e+07	0
P25233	91	0.999094	32.0448	107.02	R	QAAEEGRAHQPQSPARPIPAPPAPAQLVQKA	AH(0.001)QPQSPAR(0.999)PIPAPPAPAQLVQK	0	0	0	0	0	0	1.95098e+06	0	0	5.59955e+06	0	0	8.4437e+06	0	0	1.03198e+07	0	0	4.53356e+06	0	0	3.9719e+06	0	0	4.03733e+06	0	0	5.11308e+06	0	0	7.72925e+06	0	0	1.49692e+07	0	0
P28028	429	1	129.225	266.07	R	SSSSEDRSRMKTLGRRDSSDDWEIPDGQITV	R(1)DSSDDWEIPDGQITVGQR	2.61754e+07	0	0	4.25615e+07	0	0	1.83882e+07	0	0	2.42998e+07	0	0	2.23528e+07	0	0	2.90428e+07	0	0	2.22709e+07	0	0	2.51146e+07	0	0	2.24303e+07	0	0	0	0	0	0	0	0	5.30535e+06	0	0
P28661	65	1	74.3044	180.11	R	AESKTRVARPQILEPRPQSPDLCDDDVEFRG	PQILEPR(1)PQSPDLCDDDVEFR	6.36079e+06	0	0	1.13369e+07	0	0	8.22783e+06	0	0	1.74989e+07	0	0	3.30608e+07	0	0	1.92876e+07	0	0	1.09511e+07	0	0	1.169e+07	0	0	1.54851e+07	0	0	6.66362e+07	0	0	3.448e+07	0	0	3.85525e+07	0	0
P28738	926	0.814528	6.6142	130.56	R	NMARRAHSAQIAKPIRPGHYPASSPTAVHAV	PIR(0.815)PGH(0.178)YPASSPTAVH(0.007)AVR	0	0	0	0	0	0	0	0	0	0	0	0	0	0	0	0	0	0	0	0	0	0	0	0	0	0	0	0	0	0	1.18441e+07	0	0	0	0	0
P31324	82	1	89.6592	101	R	GGIPSKGVNFAEEPMRSDSENGEEEEAAEAG	GVNFAEEPMR(1)SDSENGEEEEAAEAGAFNAPVINR	0	0	0	1.6332e+07	0	0	1.42959e+07	0	0	1.76938e+07	0	0	2.969e+07	0	0	1.40752e+07	0	0	0	0	0	3.2034e+07	0	0	0	0	0	0	0	0	0	0	0	0	0	0
P39447	286	0.983669	19.2085	43.483	R	VPDLSDSIHSANASERDDISEIQSLASDHSG	ATLLNVPDLSDSIH(0.906)SANASER(0.984)DDISEIQSLASDH(0.092)SGR(0.019)	0	0	0	0	0	0	0	0	0	0	0	0	0	8.70155e+06	0	0	0	0	0	0	0	0	3.29207e+07	0	0	0	0	0	1.76551e+07	0	0	3.36026e+07	0	0	4.67703e+07	0
P39447	1416	0.999894	40.3623	64.508	R	GKPETDAVDRSFSEKRYDPAQATPPPPPLPS	R(1)YDPAQATPPPPPLPSQYSQPAPPLSSSSLHIHSK	0	0	0	1.37248e+07	0	0	0	0	0	0	0	0	0	0	0	0	0	0	0	0	0	6.38234e+06	0	0	0	0	0	0	0	0	0	0	0	0	0	0
P41164	359	0.502378	0	42.536	R	LLDDPSNSHFIAWTGRGMEFKLIEPEEVARR	RGSLQLWQFLVALLDDPSNSH(0.995)FIAWTGR(0.502)GMEFK(0.502)	0	1.67085e+07	0	0	2.44758e+07	0	0	2.42147e+07	0	0	3.03571e+07	0	0	3.12591e+07	0	0	5.15252e+07	0	0	7.67517e+07	0	0	5.0773e+07	0	0	6.26751e+06	0	0	0	0	0	5.79343e+07	0	0	5.39419e+07	0
P42125	238	0.910706	10.0816	68.355	R	ARSVMTKWLAIPDHSRQLTKNMMRKATADNL	WLAIPDH(0.998)SR(0.911)QLTK(0.091)NMMR	0	0	0	0	0	0	0	0	0	0	0	0	0	0	0	0	0	0	0	0	0	0	5.51231e+07	0	0	4.67913e+07	0	0	0	0	0	0	0	0	0	0
P43006	528	0.993796	22.046	152.13	R	IEMTKTQSIYDDKNHRESNSNQCVYAAHNSV	NH(0.006)R(0.994)ESNSNQCVYAAHNSVVIDECK	560397520	0	0	1100937263	0	0	408440130	0	0	4.09839e+08	0	0	2.89067e+08	0	0	4.80426e+08	0	0	524235574	0	0	5.73494e+08	0	0	4.22897e+08	0	0	3.99611e+08	0	0	8.27591e+08	0	0	5.98536e+08	0	0
P47708	276	0.931143	11.3108	61.844	R	RSPAGLRRANSVQAARPAPAPVPSPAPPQPV	R(0.069)ANSVQAAR(0.931)PAPAPVPSPAPPQPVQPGPPGGSR	0	0	0	0	0	0	0	0	0	0	0	0	0	0	0	0	0	0	0	0	0	0	0	0	0	0	0	0	0	0	0	0	0	3.34727e+06	0	0
P47857	376	0.995011	22.9983	96.756	R	AMDEKRFDEAIKLRGRSFMNNWEVYKLLAHV	GR(0.995)SFMNNWEVYK(0.005)	0	0	0	0	0	0	0	0	0	0	0	0	0	0	0	0	0	0	0	0	0	0	0	0	0	0	0	0	0	0	8.3407e+06	0	0	0	0	0
P47941	39	0.999565	33.6161	89.462	R	AQTRLQGQRHGMFLVRDSSTCPGDYVLSVSE	HGMFLVR(1)DSSTCPGDYVLSVSENSR	2.36455e+07	0	0	0	0	0	1.88301e+07	0	0	1.1475e+07	0	0	0	0	0	8.66438e+06	0	0	0	0	0	4.85614e+07	0	0	0	0	0	2.25326e+07	0	0	1.16371e+07	0	0	0	0	0
P48193	558	0.999037	32.9958	80.835	R	SLDGAAAAESTDRSPRPTSAPAIAQSQVTEG	SPR(0.999)PTSAPAIAQSQVTEGPGAPIK(0.001)K	3.26558e+06	0	0	6.1083e+06	0	0	2.91603e+06	0	0	5.72902e+06	0	0	0	0	0	8.38767e+06	0	0	0	0	0	0	0	0	0	0	0	0	0	0	0	0	0	0	0	0
P49025	1347	0.868649	8.20414	82.831	R	TPATARQQIAMSAIVRSPEHQPSAMSLLAPP	QQIAMSAIVR(0.869)SPEH(0.131)QPSAMSLLAPPSSR	0	0	0	0	0	0	0	0	0	0	0	0	0	0	0	0	0	0	0	0	0	0	0	0	0	0	0	0	0	0	0	0	0	0	0	0
P50136	343	0.961826	13.0804	65.801	R	YRIGHHSTSDDSSAYRSVDEVNYWDKQDHPI	IGH(0.227)H(0.811)STSDDSSAYR(0.962)SVDEVNYWDKQDHPISR	0	3.55572e+07	0	0	2.51504e+07	0	0	0	0	0	3.36893e+07	0	0	3.73814e+07	0	0	2.27282e+07	0	0	2.55168e+07	0	0	2.04447e+07	0	0	0	0	0	4.83263e+07	0	0	2.23484e+07	0	0	0	0
P51791	747	0.983291	17.6979	108.96	R	VCFAQHTPSLPAESPRPLKLRSILDMSPFTV	VCFAQHTPSLPAESPR(0.983)PLK(0.017)	7.81865e+06	0	0	0	0	0	0	0	0	0	0	0	0	0	0	9.26526e+06	0	0	8.6601e+06	0	0	0	0	0	0	0	0	0	0	0	1.2294e+07	0	0	8.75106e+06	0	0
P52623	18	0.827142	6.79892	50.397	R	SAGGGGSESAAPEADRPQPRPFLIGVSGGTA	MASAGGGGSESAAPEADR(0.827)PQPR(0.173)	1.7936e+08	0	0	1.05822e+08	0	0	1.36758e+08	0	0	3.34352e+08	0	0	1.84541e+08	0	0	2.13831e+08	0	0	0	0	0	0	0	0	0	0	0	0	0	0	0	0	0	0	0	0
P54227	14	1	101.622	126.83	R	__MASSDIQVKELEKRASGQAFELILSPRSK	R(1)ASGQAFELILSPR	1.56228e+07	0	0	1.2844e+07	0	0	1.63111e+07	0	0	1.36619e+07	0	0	2.30806e+07	0	0	1.86101e+07	0	0	5.27668e+07	0	0	1.50074e+07	0	0	3.16035e+07	0	0	2.33138e+07	0	0	9.89281e+06	0	0	2.06054e+07	0	0
P54823	22	0.999987	48.8172	66.059	R	ENPVIMGLSSQNGQLRGPVKASAGPGGGGTQ	MSTARTENPVIMGLSSQNGQLR(1)GPVK(1)	0	0	0	0	0	0	0	0	0	0	0	0	0	0	0	0	0	0	0	0	0	0	0	0	0	0	0	0	0	0	0	0	0	0	0	0
P55086	43	0.995654	23.7622	46.149	R	LAPGRNNSKGRSLIGRLETQPPITGKGVPVE	SLIGR(0.996)LETQPPITGK(0.004)GVPVEPGFSIDEFSASILTGK	0	0	0	0	0	0	0	0	0	0	0	0	0	0	0	0	0	0	4.13618e+07	0	0	0	0	0	0	0	0	0	0	0	0	0	0	0	0	0
P55088	284	1	64.2773	107.45	R	AAQQTKGSYMEVEDNRSQVETEDLILKPGVV	GSYMEVEDNR(1)SQVETEDLILKPGVVHVIDIDR	60539678	0	0	4.36306e+07	0	0	2.66145e+07	0	0	5.50485e+07	0	0	5.7496e+07	0	0	8.12275e+07	0	0	3.66942e+07	0	0	6.32802e+07	0	0	5.06608e+07	0	0	2.22748e+07	0	0	6.86687e+07	0	0	118543242	0	0
P58871	541	0.999996	54.1017	86.079	R	VSQVGPGTPPAPESPRKPISGVQGNDPGISL	GEGVSQVGPGTPPAPESPR(1)K(1)PISGVQGNDPGISLPQR	0	2.38607e+07	0	0	5.13924e+07	0	0	2.38518e+07	0	0	1.4481e+07	0	7.3804e+06	9.63339e+06	0	7.40645e+06	1.32388e+07	0	0	0	0	9.74725e+06	0	0	6.8285e+06	3.69931e+07	0	0	8.92342e+06	0	0	1.96121e+07	0	8.43377e+06	1.63862e+07	0
P59242	646	1	73.8411	73.841	R	ELQAEQQNQEVTGRHRNQVLEKQLAALREEA	H(1)R(1)NQVLEK(1)QLAALR(1)	0	0	0	0	0	0	0	0	0	0	0	0	0	0	0	0	0	0	0	0	0	0	0	0	0	0	0	0	0	0	0	0	0	0	0	5.88088e+06
P59644	290	0.473764	0	71.811	R	DPRLSPSFRARPEAPRHSPEDPVLPPPPQTL	AR(0.052)PEAPR(0.474)H(0.474)SPEDPVLPPPPQTLPLDVSPGLPESGTR	0	0	0	0	0	0	0	0	0	0	0	0	0	0	0	0	0	0	0	0	0	0	0	0	0	0	0	0	0	0	0	0	0	0	0	0
P60904	7	0.99677	24.9674	79.489	R	_________MADQRQRSLSTSGESLYHVLGL	QR(0.997)SLSTSGESLYHVLGLDK(0.003)	0	0	0	1.20294e+07	0	0	8.33813e+06	0	0	0	0	0	8.22175e+06	0	0	2.71361e+06	0	0	0	0	0	0	0	0	1.62872e+07	0	0	0	0	0	0	0	0	7.99265e+06	0	0
P61264	25	0.694609	5.70259	74.404	R	SAKDSDDEEEVVHVDRDHFMDEFFEQVEEIR	SAK(0.044)DSDDEEEVVH(0.187)VDR(0.695)DH(0.075)FMDEFFEQVEEIR	0	0	0	0	0	0	0	0	0	0	0	0	0	0	0	3.599e+07	0	0	0	0	0	0	0	0	0	0	0	0	0	0	0	0	0	0	0	0
P61982	143	0.999985	48.3779	107.01	R	GDYYRYLAEVATGEKRATVVESSEKAYSEAH	R(1)ATVVESSEK	0	0	0	0	0	0	0	0	0	0	0	0	0	0	0	0	0	0	0	0	0	0	0	0	0	0	0	2.67035e+07	0	0	2.82917e+07	0	0	0	0	0
P62983	54	0.999999	62.1226	123.61	R	DQQRLIFAGKQLEDGRTLSDYNIQKESTLHL	QLEDGR(1)TLSDYNIQKESTLHLVLR	4.09789e+07	0	0	3.62944e+07	0	0	4.94147e+07	0	0	3.92633e+07	0	0	6.09582e+07	0	0	5.95466e+07	0	0	8.83711e+07	0	0	2.84172e+07	0	0	7.83142e+07	0	0	4.74337e+07	0	0	2.68915e+07	0	0	3.57077e+07	0	0
P62996	198	0.998769	29.4182	180.09	R	ELDGRRIRVDFSITKRPHTPTPGIYMGRPTY	R(0.999)PH(0.001)TPTPGIYMGR	1.53799e+08	0	0	3.46892e+08	0	0	2.69141e+08	0	0	2.55611e+08	0	0	3.21926e+08	0	0	330819999	0	0	2.16973e+08	0	0	1.54663e+08	0	0	2.60996e+08	0	0	115489517	0	0	2.97916e+08	0	0	153894171	0	0
P63044	66	0.888995	9.03899	103.53	R	DKVLERDQKLSELDDRADALQAGASQFETSA	DQK(0.111)LSELDDR(0.889)ADALQAGASQFETSAAK	2.32227e+07	0	0	3.04621e+07	0	0	0	0	0	2.26633e+07	0	0	0	0	0	1.77786e+07	0	0	0	0	0	0	0	0	3.17481e+07	0	0	0	0	0	0	0	0	0	0	0
P63115	3	0.936727	11.7751	125.2	R	_____________MRRDSDMASHIQQPGGHG	R(0.937)DSDMASH(0.062)IQQPGGH(0.001)GNPGPAPSPSPGPGPGPGASER	3.21749e+07	0	0	0	0	0	0	0	0	0	0	0	0	0	0	4.72282e+06	0	0	0	0	0	0	0	0	0	0	0	0	0	0	1.49237e+08	0	0	0	0	0
P63115	2	0.452084	0	93.437	R	______________MRRDSDMASHIQQPGGH	R(0.452)R(0.452)DSDMASH(0.096)IQQPGGHGNPGPAPSPSPGPGPGPGASER	0	0	0	0	0	0	0	0	0	0	0	0	0	0	0	0	0	0	0	0	0	0	0	0	0	0	0	0	0	0	0	0	0	0	0	0
P70205	459	0.352186	0	83.395	R	RSWKVNRYFTMDFKHRHPSLASSGVNGGTQL	H(0.352)R(0.352)H(0.296)PSLASSGVNGGTQLSILSK	0	0	0	0	0	0	0	0	0	0	0	0	0	0	0	0	0	0	0	0	0	0	0	0	0	0	0	0	0	0	0	0	0	0	0	0
P70211	1176	0.991872	20.9592	97.289	R	EMKNIEKPTGTDPAGRDSPIQSCQDLTPVSH	NIEK(0.008)PTGTDPAGR(0.992)DSPIQSCQDLTPVSHSQSETQMGSK	1.15553e+07	0	0	0	0	0	0	0	0	0	0	0	1.17965e+07	0	0	0	0	0	0	0	0	0	0	0	0	0	0	0	0	0	1.15715e+07	0	0	0	0	0
P70265	467	1	80.3706	126.03	R	PTHNFPKSQTPVRMRRNSFTPLSSSNTIRRP	R(1)NSFTPLSSSNTIR	1.65549e+07	0	0	1.96068e+07	0	0	1.55837e+07	0	0	1.21757e+07	0	0	2.14577e+07	0	0	1.75808e+07	0	0	1.87948e+07	0	0	2.40727e+07	0	0	4.70099e+07	0	0	0	0	0	0	0	0	1.05635e+07	0	0
P70296	49	0.998977	29.8953	141.34	R	VDELGKVLTPTQVMNRPSSISWDGLDPGKLY	VLTPTQVMNR(0.999)PSSISWDGLDPGK(0.001)	2.06341e+07	0	0	6.1507e+07	0	0	0	0	0	6.40619e+07	0	0	0	0	0	1.16739e+07	0	0	5.68035e+07	0	0	1.0106e+08	0	0	6.94639e+07	0	0	4.53358e+07	0	0	1.12014e+07	0	0	0	0	0
P70398	2429	0.999958	43.8089	74.404	R	KWTWAVEWLGDELERRPYTGNPQYTYNNWSP	R(1)PYTGNPQYTYNNWSPPVQSNETSNGYFLER	5.02853e+06	0	0	4.30081e+07	0	0	5.24122e+07	0	0	4.4317e+07	0	0	4.75754e+07	0	0	5.92508e+07	0	0	6.44685e+07	0	0	0	0	0	0	0	0	0	0	0	4.4127e+07	0	0	3.68035e+07	0	0
P97364	191	0.999717	35.9794	129.42	R	MLMLLSVSQSMSEKEREKVTPLMIKGFRDAA	ER(1)EKVTPLMIK	0	0	0	0	0	0	0	0	0	0	0	0	0	0	0	0	0	0	0	0	0	0	0	0	0	0	0	0	0	0	0	0	0	0	0	0
P97366	111	0.999963	44.3833	88.917	R	IETDSKSLRSVNGSRRNSGSSLVSSSSASSN	R(1)NSGSSLVSSSSASSNLSHLEEDSWILWGR	1.42637e+07	0	0	3.97738e+06	0	0	9.81526e+06	0	0	1.33064e+07	0	0	1.54529e+07	0	0	0	0	0	3.1398e+07	0	0	2.37151e+07	0	0	3.88497e+07	0	0	0	0	0	1.44113e+07	0	0	1.30817e+07	0	0
P97412	2098	1	99.2042	166.24	R	SNIVPQRMAAQMVRSRSLPAFPTYLPLIRAQ	SR(1)SLPAFPTYLPLIR	4.71921e+07	0	0	4.50575e+07	0	0	2.08163e+07	0	0	3.78552e+07	0	0	3.39249e+07	0	0	3.57761e+07	0	0	7.53106e+07	0	0	5.92848e+07	0	0	6.38243e+07	0	0	2.49394e+07	0	0	5.36988e+07	0	0	3.78157e+07	0	0
P97492	191	0.402418	0	82.089	R	KSPLYQECLLAEAEGRPLREPGSSHLGSPDT	SPLYQECLLAEAEGR(0.402)PLR(0.402)EPGSSH(0.191)LGSPDTAR(0.004)	0	0	0	0	0	0	0	0	0	0	0	0	0	0	0	0	0	0	0	0	0	0	0	0	0	0	0	0	0	0	0	0	0	0	0	0
P97492	194	0.520809	1.36403	94.96	R	LYQECLLAEAEGRPLREPGSSHLGSPDTARK	SPLYQECLLAEAEGR(0.099)PLR(0.521)EPGSSH(0.38)LGSPDTAR	0	0	0	0	0	0	0	0	0	0	0	0	0	0	0	0	0	0	6.1558e+07	0	0	0	0	0	0	0	0	0	0	0	0	0	0	0	0	0
Q01097	880	1	82.4115	108.73	R	SRGIYSCIHGVAIEERQSVMNSPTATMNNTH	GIYSCIH(1)GVAIEER(1)QSVMNSPTATMNNTHSNILR	7.08308e+06	2.64328e+07	0	3.90525e+06	0	0	0	2.3582e+07	0	4.65974e+06	1.72242e+07	0	0	1.28083e+07	0	2.91797e+06	1.82663e+07	0	0	5.04531e+07	0	2.04492e+07	2.44632e+07	0	0	2.42697e+07	0	0	1.36781e+07	0	0	0	0	0	1.2249e+07	0
Q01097	1300	0.551954	0.906047	112.56	R	PTNSKAQKKNRNKLRRQHSYDTFVDLQKEEA	R(0.552)QH(0.448)SYDTFVDLQKEEAALAPR	7.81034e+07	0	0	0	0	0	0	0	0	0	0	0	0	0	0	0	0	0	6.58358e+07	0	0	0	0	0	1.05517e+08	0	0	3.08836e+07	0	0	0	0	0	0	0	0
Q01097	1057	0.923119	11.9555	65.244	R	FSFKSDRYSGHDDLIRSDVSDISTHTVTYGN	YSGH(0.025)DDLIR(0.923)SDVSDISTH(0.959)TVTYGNIEGNAAK(0.092)	0	6.36197e+06	0	0	1.55298e+07	0	0	1.61717e+07	0	0	0	0	0	0	0	0	4.56912e+06	0	0	0	0	0	0	0	0	2.19262e+07	0	0	0	0	0	0	0	0	5.01491e+06	0
Q01755	47	1	68.0445	68.044	R	ASSARGTDRVGSTVARARPPSPQGPRRGAVK	VGSTVAR(1)AR(1)PPSPQGPR(1)	0	0	0	0	0	0	0	0	0	0	0	0	0	0	2.38697e+06	0	0	0	0	0	0	0	0	0	0	0	0	0	0	0	0	0	0	0	0	0
Q01755	49	1	68.0445	68.044	R	SARGTDRVGSTVARARPPSPQGPRRGAVKTA	VGSTVAR(1)AR(1)PPSPQGPR(1)	0	0	0	0	0	0	0	0	0	0	0	0	0	0	2.38697e+06	0	0	0	0	0	0	0	0	0	0	0	0	0	0	0	0	0	0	0	0	0
Q02248	550	1	149.793	179.93	R	RLVQLLVRAHQDTQRRTSMGGTQQQFVEGVR	R(1)TSMGGTQQQFVEGVR	7.99303e+07	0	0	173364552	0	0	1.57789e+08	0	0	7.25405e+07	0	0	1.7235e+08	0	0	8.18621e+07	0	0	1.81678e+08	0	0	1.79162e+08	0	0	7.46888e+07	0	0	6.83754e+07	0	0	8.1776e+07	0	0	5.95758e+07	0	0
Q03141	417	0.988053	20.0246	129.54	R	HHKGQRSVSSSQKQRRYSDHAGPAIPSVVAY	R(0.988)YSDH(0.01)AGPAIPSVVAYPK(0.002)	6.17333e+07	0	0	6.13413e+07	0	0	0	0	0	2.19747e+07	0	0	3.24056e+07	0	0	2.22905e+07	0	0	6.55748e+07	0	0	7.71054e+07	0	0	4.10575e+07	0	0	4.00634e+07	0	0	3.20989e+07	0	0	1.19681e+07	0	0
Q03173	352	1	67.9546	180.09	R	LPHYATVPRPLNKNSRPSSPVNTPSSQPPAA	NSR(1)PSSPVNTPSSQPPAAK	0	0	0	5.55479e+06	0	0	4.77676e+06	0	0	5.33983e+06	0	0	7.93119e+06	0	0	4.92348e+06	0	0	0	0	0	0	0	0	0	0	0	0	0	0	0	0	0	0	0	0
Q03391	985	0.999003	30.0081	118.05	R	LGLGEARAAPRGAAGRPLSPPTTQPPQKPPP	GAAGR(0.999)PLSPPTTQPPQK(0.001)PPPSYFAIVR	0	0	0	0	0	0	0	0	0	8.31192e+06	0	0	0	0	0	9.0686e+06	0	0	0	0	0	0	0	0	0	0	0	0	0	0	1.33858e+07	0	0	1.79657e+07	0	0
Q05793	2480	0.999998	58.4928	85.924	R	SPRWTRLGIPVKLEPRMFGLMNSHAMLKIAS	LEPR(1)MFGLMNSHAMLK	0	0	0	0	0	0	0	0	0	0	0	0	4.91176e+06	0	0	0	0	0	0	0	0	0	0	0	0	0	0	0	0	0	0	0	0	0	0	0
Q0P5V2	624	1	63.6783	86.675	R	APAERGRGEVVDLTRRAGSPAGAGGQPGFAG	R(1)AGSPAGAGGQPGFAGVLHGPQDGVIDLTVGHR	2.50074e+06	0	0	1.21329e+07	0	0	1.1668e+07	0	0	0	0	0	0	0	0	0	0	0	1.12592e+07	0	0	5.1061e+06	0	0	4.19603e+06	0	0	4.37521e+06	0	0	0	0	0	0	0	0
Q0P5W1	233	1	71.0267	79.346	R	KGQITMWDLASGKLLRSITDAHPPGTAILHI	LLR(1)SITDAH(1)PPGTAILH(0.657)IK(0.343)	0	0	0	0	0	0	0	0	0	0	0	0	0	0	0	0	0	0	0	0	0	0	0	0	0	0	0	0	0	0	0	0	0	0	0	0
Q0QWG9	570	1	136.538	151.7	R	LNSSFKGKIGTMSKSRASPPVPSLVGTSGPR	SR(1)ASPPVPSLVGTSGPR	0	0	0	0	0	0	0	0	0	0	0	0	0	0	0	0	0	0	0	0	0	0	0	0	0	0	0	0	0	0	1.06063e+07	0	0	2.39973e+07	0	0
Q0VBL3	257	0.999997	57.304	92.41	R	RPLKIEAVYVSRRRSRSPLDKDAYAPSSSVV	SR(1)SPLDK(1)DAYAPSSSVVGTSVGSHR	0	0	0	1.76391e+07	3.56128e+07	0	1.86781e+07	4.83482e+07	0	0	1.99322e+07	0	5.83568e+06	2.51834e+07	0	0	2.88859e+07	0	1.14333e+07	3.56718e+07	0	2.75123e+06	3.79319e+07	0	0	5.50291e+07	0	6.25704e+06	2.16996e+07	0	0	0	0	0	0	0
Q0VF94	226	1	64.0395	64.04	R	VELLTDFLCFLEIYQRRRLRVVLEVTGLDTC	EVELLTDFLCFLEIYQR(1)R(1)R(1)	0	0	2.00743e+08	0	0	1.51011e+08	0	0	1.23581e+08	0	0	1.4863e+08	0	0	0	0	0	1.33987e+08	0	0	1.64295e+08	0	0	1.75274e+08	0	0	0	0	0	1.97061e+08	0	0	1.90014e+08	0	0	1.67963e+08
Q0VF94	227	1	64.0395	64.04	R	ELLTDFLCFLEIYQRRRLRVVLEVTGLDTCY	EVELLTDFLCFLEIYQR(1)R(1)R(1)	0	0	2.00743e+08	0	0	1.51011e+08	0	0	1.23581e+08	0	0	1.4863e+08	0	0	0	0	0	1.33987e+08	0	0	1.64295e+08	0	0	1.75274e+08	0	0	0	0	0	1.97061e+08	0	0	1.90014e+08	0	0	1.67963e+08
Q0VGU4	155	1	130.658	147.9	R	PPRPQTQDRDPEEDDRSEELEALASLLQELR	DPEEDDR(1)SEELEALASLLQELR	0	0	0	1.09689e+07	0	0	5.76052e+06	0	0	2.09556e+07	0	0	2.09053e+07	0	0	2.79316e+07	0	0	1.65736e+07	0	0	9.27132e+06	0	0	0	0	0	1.49727e+07	0	0	1.92203e+07	0	0	9.57679e+06	0	0
Q14B71	151	0.838285	7.3232	49.141	R	LYRNASVLRERMSAFRSAFHSIQETKMASSP	MSAFR(0.838)SAFH(0.155)SIQETK(0.006)MASSPSAAEADGESR	0	0	0	0	0	0	0	0	0	0	0	0	1.68401e+07	0	0	1.31978e+07	0	0	0	0	0	0	0	0	0	0	0	0	0	0	0	0	0	3.83907e+07	0	0
Q1HKZ5	679	0.992455	21.2559	87.824	R	TCANNLRYFGPAAALRSPLSNHAQRQMPGSS	YFGPAAALR(0.992)SPLSNH(0.007)AQR	0	0	0	3.72436e+07	0	0	1.39776e+07	0	0	0	0	0	2.43364e+07	0	0	7.51508e+06	0	0	2.9069e+07	0	0	14185692	0	0	0	0	0	0	0	0	2.20736e+07	0	0	8.21708e+06	0	0
Q3TLI0	704	0.999996	55.2011	72.805	R	NTTGIICRNVHMLLRRQESGSSLEPPSGLAL	R(1)QESGSSLEPPSGLALEDGAHVLR	7.20971e+06	0	0	7.14574e+06	0	0	5.22072e+06	0	0	0	0	0	0	0	0	1.04447e+07	0	0	0	0	0	0	0	0	0	0	0	1.27186e+07	0	0	0	0	0	2.52672e+07	0	0
Q3TYD6	779	0.5	0	85.99	R	SQGDTRGQNEGAGVRRHSGTSPQASPALLTE	R(0.5)H(0.5)SGTSPQASPALLTEEGSPTAPTDPILK(0.052)PEETK(0.948)	0	0	0	0	0	0	0	3.38832e+06	0	0	0	0	0	0	0	0	0	0	0	0	0	0	0	0	0	0	0	0	0	0	0	0	0	0	0	0
Q3U1Y4	933	0.998678	29.8044	93.495	R	GSSQTEPYLERPSPTRPLQRQTTWAGRSLRE	SGSSQTEPYLER(0.001)PSPTR(0.999)PLQR	2.40815e+07	0	0	4.83012e+07	0	0	0	0	0	0	0	0	3.84993e+07	0	0	3.41353e+07	0	0	6.73563e+07	0	0	0	0	0	45838121	0	0	2.05505e+07	0	0	2.45857e+07	0	0	2.19868e+07	0	0
Q3U214	105	1	94.6483	98.929	R	AAAISFPFARRADGRRWSLASLPSSGYGTNT	R(1)WSLASLPSSGYGTNTPSSTVSSSSSSR	1.35115e+07	0	0	1.97562e+07	0	0	2.15682e+07	0	0	9.63681e+06	0	0	0	0	0	7.52777e+06	0	0	1.81741e+07	0	0	1.41008e+07	0	0	0	0	0	0	0	0	0	0	0	0	0	0
Q3U214	1171	0.56399	4.79828	43.118	R	SPSSSSPASPATGHTRPSSLHGLAAKLGPPR	SPAPDAPTDTASPPNVSPSSSSPASPATGH(0.187)TR(0.564)PSSLH(0.131)GLAAK(0.118)	0	0	0	0	0	0	0	0	0	0	0	0	0	0	0	0	0	0	5.53318e+06	0	0	1.28445e+07	0	0	2.67589e+06	0	0	0	0	0	0	0	0	0	0	0
Q3U3E2	213	1	104.926	110.32	R	DKTHPPSSSSSSIIRRTSSLDTLAAPYLAGH	R(1)TSSLDTLAAPYLAGHWPR	0	0	0	0	0	0	0	0	0	0	0	0	0	0	0	1.50715e+06	0	0	0	0	0	0	0	0	0	0	0	0	0	0	2.15805e+07	0	0	2.72995e+07	0	0
Q3U3E2	135	1	67.3878	68.487	R	SPTRGTAPGARSSPPRPQPPPPLLGTVSSPS	SSPPR(1)PQPPPPLLGTVSSPSSSPTH(1)LWPSEVIAAPPSAR	9.11541e+06	3.82082e+07	0	1.55695e+07	3.22641e+07	0	0	2.65549e+07	0	1.15575e+07	1.48691e+07	0	8.04012e+06	2.36934e+07	0	2.35087e+07	9.11107e+06	0	2.48098e+07	0	0	2.84167e+07	3.96494e+07	0	3.85955e+07	2.82796e+07	0	2.53911e+07	0	0	1.43801e+07	2.38416e+07	0	0	2.26918e+07	0
Q3UD82	9	0.997998	26.9776	105.4	R	_______MGMCSRQERIQKDIDVVIQKSRAE	MGMCSRQER(0.998)IQK(0.002)	2.04313e+07	0	0	1.98846e+07	0	0	3.03304e+07	0	0	9.31655e+07	0	0	4.51421e+07	0	0	6.44022e+07	0	0	3.62052e+07	0	0	2.1306e+07	0	0	1.57168e+07	0	0	7.67279e+07	0	0	2.88182e+07	0	0	2.38967e+07	0	0
Q3UE31	333	0.920321	11.0244	61.522	R	EMKKSHSANDSEEFFREDDSGADLHNATNLR	SH(0.004)SANDSEEFFR(0.92)EDDSGADLH(0.073)NATNLR(0.003)	0	0	0	0	0	0	0	0	0	0	0	0	0	0	0	0	0	0	0	0	0	0	0	0	0	0	0	0	0	0	0	0	0	4.89914e+06	0	0
Q3UGS4	20	1	71.4486	89.816	R	PVSRVVYNGKRNSSPRSPTNSSEIFTPAHEE	NSSPR(1)SPTNSSEIFTPAHEENVR	0	0	0	8.04501e+06	0	0	0	0	0	0	0	0	0	0	0	0	0	0	0	0	0	0	0	0	0	0	0	0	0	0	0	0	0	7.7293e+06	0	0
Q3UH99	499	0.499007	0	106.42	R	GQSQTAAKRHAFASRRHNTVEQLHYIPGHHT	R(0.499)H(0.499)NTVEQLH(0.002)YIPGHHTCYTASK	0	0	0	0	0	0	0	0	0	0	0	0	0	0	0	0	0	0	0	0	0	0	0	0	0	0	0	0	0	0	0	0	0	0	0	0
Q3UHH1	21	1	77.9323	83.362	R	AEWEDGERFSFEDSDRFEEDSLCSFISEAES	FSFEDSDR(1)FEEDSLCSFISEAESLCQNWR	0	0	0	3.66989e+06	0	0	6.30547e+06	0	0	0	0	0	0	0	0	0	0	0	6.25735e+06	0	0	0	0	0	7.44933e+06	0	0	0	0	0	0	0	0	0	0	0
Q3UHJ0	9	0.999995	52.9014	63.491	R	_______MKKFFDSRREQGSSGLGSGSSGGG	R(1)EQGSSGLGSGSSGGGGSSSGLGSGYIGR	0	0	0	0	0	0	0	0	0	1.53619e+07	0	0	2.04034e+07	0	0	0	0	0	0	0	0	0	0	0	0	0	0	2.33465e+07	0	0	0	0	0	1.44414e+07	0	0
Q3UHJ0	632	0.919523	10.5796	73.953	R	LTPPSSPKTQRAGHRRILSDVTHSAVFGVPA	R(0.92)ILSDVTH(0.08)SAVFGVPASK	3.87002e+06	0	0	1.3864e+07	0	0	0	0	0	2.00086e+07	0	0	0	0	0	2.76078e+07	0	0	9.34773e+06	0	0	0	0	0	2.82287e+07	0	0	1.95939e+07	0	0	6.80305e+06	0	0	4.63083e+07	0	0
Q3UHK6	177	0.999472	33.9397	115.77	R	TETDHPSSLQNHPRLRTPPPPLPHAHTPNQH	LR(0.999)TPPPPLPHAHTPNQHHAASINSLNR	2.33777e+07	0	0	1.44515e+07	0	0	3.2561e+07	0	0	1.82373e+07	0	0	3.15317e+07	0	0	2.00401e+07	0	0	0	0	0	1.24806e+07	0	0	4.96792e+07	0	0	1.4825e+07	0	0	2.02705e+07	0	0	8.33007e+06	0	0
Q3UHL1	444	0.999996	54.313	84.683	R	VTPATDRSATPATDGRATPATEESTVPATQS	SATPATDGR(1)ATPATEESTVPATQSSALPAAK	0	0	0	0	0	0	5.95728e+06	0	0	0	0	0	6.56378e+06	0	0	0	0	0	0	0	0	0	0	0	0	0	0	0	0	0	0	0	0	0	0	0
Q3ULB5	559	0.5	0	133.32	R	SDFGFCAQISKDVPKRKSLVGTPYWMAPEVI;SDFGFCAQVSKEVPKRKSLVGTPYWMAPEVI	R(0.5)K(0.5)SLVGTPYWMAPEVISR	7.87816e+07	0	0	9.31945e+07	0	0	2.75185e+07	0	0	4.57912e+07	0	0	2.51124e+07	0	0	4.51946e+07	0	0	1.03139e+08	0	0	7.80448e+07	0	0	7.25621e+07	0	0	0	0	0	4.13319e+07	0	0	1.67909e+07	0	0
Q3UNH4	672	0.726023	4.8531	77.53	R	AQPQRDTRSIGSLPEREPSASTSQKDLAAAA	SIGSLPER(0.726)EPSASTSQK(0.237)DLAAAAAQK(0.036)	0	0	0	1.22558e+07	0	0	0	0	0	0	0	0	0	0	0	0	0	0	0	0	0	0	0	0	0	0	0	0	0	0	0	0	0	0	0	0
Q3UNH4	833	0.993842	22.0787	126.59	R	VLAAALAPQEATEPVRDVSWDEKGMTWEVYG	VRPGSVLAAALAPQEATEPVR(0.994)DVSWDEK(0.006)	0	0	0	1.37388e+07	0	0	0	0	0	9.90812e+06	0	0	2.29558e+07	0	0	1.06606e+07	0	0	2.63911e+07	0	0	2.16416e+07	0	0	2.05199e+07	0	0	0	0	0	0	0	0	5.92476e+06	0	0
Q3UTJ2	827	0.999846	38.1661	117.01	R	SALKDICDQIKAEKRRGSLPDNSILHRLISE	R(1)GSLPDNSILHR	4.94065e+07	0	0	4.44413e+07	0	0	5.98284e+07	0	0	0	0	0	8.66483e+06	0	0	7.72213e+06	0	0	6.26757e+07	0	0	8.21476e+07	0	0	5.28716e+07	0	0	0	0	0	0	0	0	8.20083e+06	0	0
Q3UUG6	480	0.999944	43.4539	122.68	R	GSSSLISHCSSDPADRLSPFLAARHFNLPSK	SSEAAGSSSLISHCSSDPADR(1)LSPFLAAR	3.73515e+08	0	0	242011686	0	0	270959379	0	0	175487102	0	0	2.56232e+08	0	0	1.876e+08	0	0	3.07268e+08	0	0	3.06011e+08	0	0	2.07989e+08	0	0	1.67688e+08	0	0	2.35966e+08	0	0	2.50823e+08	0	0
Q4KMM3	349	0.999999	59.4338	129.08	R	SLSEDAFTESELSPIREELLSSEPRQEKSSD	STEESLSEDAFTESELSPIR(1)EELLSSEPR	3.71045e+07	0	0	0	0	0	6.33394e+07	0	0	4.42105e+07	0	0	2.83714e+07	0	0	5.6043e+07	0	0	0	0	0	0	0	0	9.36987e+07	0	0	6.982e+07	0	0	0	0	0	4.95524e+07	0	0
Q50H33	411	1	83.2006	145.28	R	SRKAPVQWMPPPDKRRNSELFQSLISKSRET	R(1)NSELFQSLISK	1.90854e+07	0	0	1.7303e+07	0	0	1.76749e+07	0	0	5.63467e+07	0	0	5.08768e+07	0	0	4.8875e+07	0	0	3.31273e+07	0	0	5.0756e+07	0	0	4.20367e+07	0	0	2.17841e+07	0	0	2.48113e+07	0	0	4.91082e+07	0	0
Q52KI8	570	1	147.416	160.79	R	SSRRRRSPSPPPARRRRSPSPAPPPPPPPPP	R(1)R(1)SPSPAPPPPPPPPPPR	0	9.88281e+07	0	8.96544e+06	1.17757e+08	0	6.08181e+06	1.54734e+08	0	6.62883e+06	8.99029e+07	0	7.19811e+06	8.17116e+07	0	1.17778e+07	6.48739e+07	0	8.53018e+06	7.24739e+07	0	6.48534e+06	8.7405e+07	0	1.44591e+07	1.59898e+08	0	0	5.95891e+07	0	0	7.99364e+07	0	8.94453e+06	1.46651e+08	0
Q52KI8	571	1	145.249	161.25	R	SRRRRSPSPPPARRRRSPSPAPPPPPPPPPP	R(1)R(1)SPSPAPPPPPPPPPPR	0	9.88281e+07	0	8.96544e+06	1.17757e+08	0	6.08181e+06	1.54734e+08	0	6.62883e+06	8.99029e+07	0	0	8.17116e+07	0	1.17778e+07	6.48739e+07	0	8.53018e+06	7.24739e+07	0	1.3948e+06	8.7405e+07	0	1.31778e+07	1.59898e+08	0	0	5.95891e+07	0	0	7.99364e+07	0	8.94453e+06	1.46651e+08	0
Q569Z6	247	0.999975	46.049	179.94	R	GSASRASVSDLSPRERSPALKSPLQSVVVRR	ER(1)SPALK(1)SPLQSVVVR	7.32042e+06	0	0	6.43733e+06	3.80426e+07	0	8.07132e+06	4.54565e+07	0	7.4772e+06	2.36833e+07	0	5.00992e+06	3.55259e+07	0	6.69984e+06	2.99152e+07	0	5.42266e+06	0	0	1.01564e+07	3.86014e+07	0	5.59283e+06	0	0	9.39924e+06	3.2637e+07	0	5.04531e+06	0	0	3.24342e+06	3.81423e+07	0
Q570Y9	278	0.999447	32.5695	69.092	R	SVSPSKEIKIVSAVRRSSMSSCGSSGYFSSS	R(0.999)SSMSSCGSSGYFSSSPTLSSSPPVLCNPK(0.001)	0	0	0	0	0	0	4.00287e+06	0	0	0	0	0	0	0	0	0	0	0	0	0	0	0	0	0	0	0	0	0	0	0	0	0	0	0	0	0
Q5DTN8	620	0.499995	0	99.813	R	NELLEFRILELEERERKSPAINFHHTPFVDG	ER(0.5)K(0.5)SPAINFHHTPFVDGK	0	0	0	0	0	0	0	0	0	0	0	0	0	0	0	0	0	0	4.77701e+07	0	0	0	0	0	0	0	0	6.35448e+07	0	0	6.97784e+06	0	0	9.00257e+06	0	0
Q5DU25	1146	1	109.692	118.37	R	SSSLRDLSDAGKRGRRNSVGSLDSTIEGSVI	R(1)NSVGSLDSTIEGSVISSPRPHQR	186778414	0	0	1.96037e+08	0	0	9.49927e+07	0	0	0	0	0	8.7758e+07	0	0	7.73892e+07	0	0	2.13853e+08	0	0	3.0184e+08	0	0	2.74112e+08	0	0	3.12976e+07	0	0	3.81212e+07	0	0	4.41507e+07	0	0
Q5DU28	1350	0.999333	33.7557	52.721	R	WERSYNTRRMDNSNTRLAVQMERDPGSDDNN	MDNSNTR(0.999)LAVQMER(0.007)DPGSDDNNLNSIFYEH(0.773)LTR(0.221)	0	0	0	0	0	0	0	0	0	0	0	0	0	0	0	0	0	0	0	0	0	0	0	0	0	0	0	0	0	0	0	0	0	0	1.78697e+06	0
Q5F226	4211	1	52.1617	52.162	R	PHPEAMQGPLPPSPRRHVSPAVMPDPAGLYG	R(1)H(1)VSPAVMPDPAGLYGGFPFPLELENK(1)	0	0	0	0	0	0	0	0	0	0	0	0	0	0	0	0	0	0	0	0	9.26774e+07	0	0	0	0	0	0	0	0	0	0	0	0	0	0	0
Q5NCX5	1346	1	58.4566	58.457	R	AASPLKSCEYHALCSRFQELLLLPEDYFMPP	SCEYH(1)ALCSR(1)FQELLLLPEDYFMPPPK(1)	0	0	2.58606e+07	0	0	2.2649e+07	0	0	2.76355e+07	0	0	1.48639e+07	0	0	1.11903e+07	0	0	1.4347e+07	0	0	5.01853e+07	0	0	0	0	0	3.59345e+07	0	0	0	0	0	1.73532e+07	0	0	0
Q5U3K5	590	0.999985	48.3445	87.457	R	SDESDTQRRMGRFPVREDLSDVTDEDTGPAQ	FPVR(1)EDLSDVTDEDTGPAQPPPPSK	0	0	0	1.55648e+07	0	0	8.87324e+06	0	0	8.77393e+06	0	0	1.31682e+07	0	0	8.97946e+06	0	0	0	0	0	0	0	0	0	0	0	1.12684e+07	0	0	0	0	0	0	0	0
Q60598	414	0.996036	24.0007	89.879	R	KQTPPASPSPQPIEDRPPSSPIYEDAAPFKA	K(1)QTPPASPSPQPIEDR(0.996)PPSSPIYEDAAPFK(0.004)	1.06073e+07	1.13955e+08	0	15614636	1.01177e+08	0	8.50805e+06	8.26956e+07	0	0	1.00592e+08	0	1.66075e+07	9.5012e+07	0	1.22065e+07	141951309	0	0	1.97286e+08	0	0	1.2282e+08	0	0	0	0	1.22307e+07	1.10824e+08	0	1.25367e+07	1.36204e+08	0	1.0127e+07	2.06271e+08	0
Q60899	224	0.95306	13.0758	99.539	R	KTNQAILSQLYQSPNRRYPGPLAQQAQRFRL	TNQAILSQLYQSPNR(0.953)R(0.047)	0	0	0	0	0	0	0	0	0	0	0	0	0	0	0	0	0	0	0	0	0	0	0	0	0	0	0	0	0	0	0	0	0	2.30942e+07	0	0
Q61122	7	1	43.3163	56.648	R	_________MATALPRTLGELQLYRILQKAN	MATALPR(1)TLGELQLYR(1)	0	1.0927e+07	0	0	3.62928e+06	0	0	1.80341e+06	0	0	1.21525e+07	0	0	3.76286e+06	0	0	8.96067e+06	0	0	0	0	0	3.51561e+07	0	0	3.88135e+07	0	0	2.51681e+07	0	0	0	0	0	0	0
Q61263	530	1	84.1976	84.198	R	RQHCPLKNPTFLDYVRPRTWTCRYVF_____	NPTFLDYVR(1)PR(1)	0	0	0	0	0	0	0	0	0	0	0	0	0	0	0	0	0	0	0	0	0	0	0	0	0	0	0	0	0	0	0	0	0	0	0	0
Q61337	135	1	108.553	157.99	R	DEGMEEELSPFRGRSRSAPPNLWAAQRYGRE	SR(1)SAPPNLWAAQR	7.1239e+07	0	0	3.60827e+07	0	0	3.54609e+07	0	0	3.91568e+07	0	0	4.44029e+07	0	0	5.95866e+07	0	0	4.49407e+07	0	0	2.04815e+07	0	0	3.45459e+07	0	0	1.15113e+08	0	0	8.11131e+07	0	0	0	0	0
Q61644	341	0.947245	15.0362	84.03	R	SNATGAVESTSQAGDRGSVSSYDRGQTYATE	K(0.023)AEGATLSNATGAVESTSQAGDR(0.947)GSVSSYDR(0.03)	0	0	0	0	0	0	1.22531e+07	0	0	2.00858e+07	0	0	2.64237e+07	0	0	0	0	0	1.1216e+07	0	0	1.03862e+07	0	0	1.64567e+07	0	0	2.41291e+07	0	0	0	0	0	3.37242e+07	0	0
Q61712	118	1	64.1035	73.386	R	RQLVAIYEVLKDDERRQRYDDVLINGLPDWR	R(1)QR(1)YDDVLINGLPDWR(1)	0	0	2.99847e+07	0	0	2.71904e+07	0	0	2.92013e+07	0	0	2.79849e+07	0	0	3.56654e+07	0	0	4.15391e+07	0	0	0	0	0	0	0	0	2.89662e+07	0	0	0	0	0	0	0	0	1.91188e+07
Q61712	120	1	64.1035	73.386	R	LVAIYEVLKDDERRQRYDDVLINGLPDWRQP	R(1)QR(1)YDDVLINGLPDWR(1)	0	0	2.99847e+07	0	0	2.71904e+07	0	0	2.92013e+07	0	0	2.79849e+07	0	0	3.56654e+07	0	0	4.15391e+07	0	0	0	0	0	0	0	0	2.89662e+07	0	0	0	0	0	0	0	0	1.91188e+07
Q61990	179	0.826887	6.79216	78.057	R	VVMLESPPKGVTIPYRPKPSSSPVIFAGGQD	GVTIPYR(0.827)PK(0.173)PSSSPVIFAGGQDR	0	0	0	0	0	0	0	0	0	0	0	0	0	0	0	0	0	0	3.09934e+07	0	0	0	0	0	0	0	0	0	0	0	9.14506e+07	0	0	0	0	0
Q62108	516	0.999997	57.1518	66.437	R	RLKAKDWGSSSGSQGREDSVLSYETVTQMEV	DWGSSSGSQGR(1)EDSVLSYETVTQMEVHYAR	0	0	0	2.11629e+07	0	0	7.63906e+06	0	0	0	0	0	0	0	0	0	0	0	8.29529e+07	0	0	0	0	0	0	0	0	0	0	0	0	0	0	0	0	0
Q62108	424	0.97563	16.1955	98.942	R	EQLMNSSLGSGTASLRSNPKRGFYIRALFDY	EQLMNSSLGSGTASLR(0.976)SNPK(0.023)R(0.001)	3.58894e+07	0	0	0	0	0	0	0	0	1.56967e+06	0	0	0	0	0	8.12005e+06	0	0	0	0	0	0	0	0	0	0	0	0	0	0	1.30037e+07	0	0	4.57349e+06	0	0
Q62188	520	0.999981	47.209	131.79	R	DLTTTPKGGTPAGSTRGSPTRPNPPVRNLHQ	GGTPAGSTR(1)GSPTRPNPPVR	1.17968e+08	0	0	9.1086e+07	0	0	1.76518e+08	0	0	2.59534e+08	0	0	1.98804e+08	0	0	1.53054e+08	0	0	7.76822e+07	0	0	7.80448e+07	0	0	9.68028e+07	0	0	2.10334e+08	0	0	143189889	0	0	1.62461e+08	0	0
Q62188	525	0.499959	0	78.234	R	PKGGTPAGSTRGSPTRPNPPVRNLHQSGFSL	GGTPAGSTR(0.5)GSPTR(0.5)PNPPVR	0	0	0	6.30265e+07	0	0	0	0	0	0	0	0	0	0	0	0	0	0	0	0	0	0	0	0	0	0	0	0	0	0	0	0	0	0	0	0
Q62188	531	0.655349	4.37705	63.932	R	AGSTRGSPTRPNPPVRNLHQSGFSLSGTQVD	GSPTR(0.105)PNPPVR(0.655)NLH(0.239)QSGFSLSGTQVDEGVR	0	0	0	0	0	0	6.72454e+06	0	0	9.06499e+06	0	0	9.97691e+06	0	0	0	0	0	0	0	0	0	0	0	0	0	0	0	0	0	0	0	0	0	0	0
Q62318	36	0.999999	59.6159	118.55	R	SGSPGSGEGSAGGEKRPAASSAAAASAAASS	R(1)PAASSAAAASAAASSPAGGGGEAQELLEHCGVCR	2.66972e+08	0	0	3.71596e+08	0	0	2.65355e+08	0	0	2.77505e+08	0	0	316989589	0	0	2.67614e+08	0	0	4.58649e+08	0	0	2.91721e+08	0	0	3.75494e+08	0	0	6.35121e+07	0	0	2.71008e+08	0	0	2.91552e+08	0	0
Q62396	189	0.499999	0	81.017	R	CGKQFQRSLALLEHQRIHSGDKPYECGECGK	SLALLEH(0.5)QR(0.5)IH(1)SGDK	0	0	0	0	0	0	0	0	0	0	6.72559e+06	0	0	3.0506e+06	0	0	0	0	0	0	0	0	0	0	0	0	0	0	0	0	0	0	0	0	0	0
Q62433	3	0.452715	0	70.802	R	_____________MSRELHDVDLAEVKPLVE	SR(0.453)ELH(0.453)DVDLAEVK(0.075)PLVEK(0.019)	0	0	0	0	0	0	0	0	0	0	0	0	0	0	0	0	0	0	0	0	0	0	0	0	0	0	0	0	0	0	0	0	0	0	0	0
Q64010	38	0.999609	34.0972	91.166	R	AVALLQGQRHGVFLVRDSSTSPGDYVLSVSE	HGVFLVR(1)DSSTSPGDYVLSVSENSR	0	0	0	2.16297e+07	0	0	2.20303e+07	0	0	2.16614e+07	0	0	9.59014e+06	0	0	7.34289e+06	0	0	4.28228e+07	0	0	5.66816e+07	0	0	2.82897e+07	0	0	0	0	0	5.72849e+06	0	0	2.5056e+07	0	0
Q64010	68	0.937401	11.7794	70.704	R	ENSRVSHYIINSSGPRPPVPPSPAQPPPGVS	VSHYIINSSGPR(0.937)PPVPPSPAQPPPGVSPSR(0.062)	0	0	0	0	0	0	0	0	0	0	0	0	0	0	0	3.03509e+06	0	0	0	0	0	0	0	0	0	0	0	0	0	0	0	0	0	9.86777e+06	0	0
Q64322	14	0.878589	9.71387	79.693	R	__MATPVPPPSPRHLRLLRLLLSGLILGAAL	MATPVPPPSPR(0.521)H(0.521)LR(0.879)LLR(0.079)	0	0	0	0	0	0	0	0	0	0	0	0	0	0	0	0	0	0	0	0	0	0	0	0	0	0	0	0	0	0	0	0	0	0	0	0
Q64332	421	0.999954	43.3058	95.834	R	LITDLVISKMNQLLSRTPALSPQRPLTTQQP	MNQLLSR(1)TPALSPQR(0.995)PLTTQQPQSGTLK(0.005)	5.0104e+06	3.75321e+07	0	0	1.42173e+07	0	0	2.61234e+07	0	6.5792e+06	5.15085e+07	0	1.32473e+07	4.12907e+07	0	5.40984e+06	4.63378e+07	0	7.07207e+06	2.12435e+07	0	9.45298e+06	3.82912e+07	0	8.7834e+06	3.40519e+07	0	0	5.08837e+07	0	8.46806e+06	3.78389e+07	0	0	3.5272e+07	0
Q64332	429	1	77.3565	196.45	R	KMNQLLSRTPALSPQRPLTTQQPQSGTLKEP	TPALSPQR(1)PLTTQQPQSGTLK(1)	9.45517e+07	1.50457e+08	0	1.05379e+08	9.07281e+07	0	5.83192e+07	3.72458e+07	0	144826872	1.47806e+08	0	1.60135e+08	1.94357e+08	0	1.14201e+08	1.61907e+08	0	6.54614e+07	0	0	8.44735e+07	1.68172e+08	0	8.27868e+07	1.12039e+08	0	1.73667e+07	1.82133e+08	0	100358044	1.77598e+08	0	120392820	2.40066e+08	0
Q64332	477	0.955564	13.3252	99.943	R	QPQGMQPPGKVLPPRRLPSGPSLPSSSSSSS	R(0.956)LPSGPSLPSSSSSSSSSSSSSSAPQR(0.044)	0	0	0	0	0	0	0	0	0	0	0	0	5.04296e+06	0	0	0	0	0	0	0	0	0	0	0	0	0	0	0	0	0	0	0	0	0	0	0
Q64337	22	1	108.146	127.16	R	KAYLLGKEEATREIRRFSFCFSPEPEAEAQA	R(1)FSFCFSPEPEAEAQAAAGPGPCER	0	0	0	0	0	0	0	0	0	1.99193e+07	0	0	0	0	0	0	0	0	0	0	0	0	0	0	1.72031e+07	0	0	6.23666e+07	0	0	0	0	0	3.1538e+07	0	0
Q68FE2	768	0.999997	55.3058	68.458	R	PQPIPRSASYPCATPRPGAPETTALHGGFQR	SASYPCATPR(1)PGAPETTALHGGFQR	1.17228e+07	0	0	1.45075e+07	0	0	4.39876e+06	0	0	0	0	0	1.42877e+07	0	0	0	0	0	1.28721e+07	0	0	5.98677e+06	0	0	6.9067e+06	0	0	1.53953e+07	0	0	1.88509e+07	0	0	0	0	0
Q68FF6	418	1	88.3811	144.95	R	QEPLPSAGATRNNRARSMDSSDLSDGAVTLQ	AR(1)SMDSSDLSDGAVTLQEYLELKK	0	0	0	0	0	0	0	0	0	0	0	0	0	0	0	2.50306e+07	0	0	0	0	0	4.69004e+07	0	0	1.07691e+08	0	0	0	0	0	3.72662e+07	0	0	4.33939e+07	0	0
Q68FH0	425	0.99997	45.2295	147	R	ITPIYEGRTYYSPVYRSPNHGTVELQGSQTA	TYYSPVYR(1)SPNHGTVELQGSQTALYR	3.64962e+07	0	0	1.55306e+07	0	0	2.35931e+07	0	0	1.3412e+07	0	0	2.49043e+07	0	0	2.10124e+07	0	0	2.67695e+07	0	0	3.64967e+07	0	0	3.3033e+07	0	0	1.20901e+07	0	0	2.89456e+07	0	0	1.05712e+07	0	0
Q69Z98	412	1	213.492	228.49	R	PARRAIEMAQHGQRSRSISGASSGLSTSPLS	SR(1)SISGASSGLSTSPLSSPR	0	0	0	3.57606e+06	0	0	0	0	0	7.27543e+06	0	0	0	0	0	0	0	0	0	0	0	6.37046e+06	0	0	9.01265e+06	0	0	0	0	0	4.80907e+06	0	0	0	0	0
Q69ZF3	891	0.923145	10.796	196.8	R	AMQLALQQQQHKKSRRPSVTQGTGLSTQPEC	R(0.923)PSVTQGTGLSTQPECGPK(0.077)	3.75114e+07	0	0	6.09343e+07	0	0	0	0	0	3.81497e+07	0	0	0	0	0	6.35538e+06	0	0	3.39374e+06	0	0	0	0	0	2.11354e+06	0	0	5.22558e+07	0	0	0	0	0	5.10313e+07	0	0
Q69ZF3	890	0.606526	2.03007	96.718	R	WAMQLALQQQQHKKSRRPSVTQGTGLSTQPE	SR(0.607)R(0.38)PSVTQGTGLSTQPECGPK(0.013)	0	0	0	0	0	0	0	0	0	0	0	0	1.03808e+07	0	0	0	0	0	0	0	0	0	0	0	2.28717e+07	0	0	0	0	0	0	0	0	0	0	0
Q69ZH9	319	0.902994	6.67858	73.817	R	RCPAMPPRARSASQDRLEDVTTHHPWPCSTS	SASQDR(0.903)LEDVTTH(0.549)H(0.549)PWPCSTSQDALSQLGQEGWHR	3.197e+07	8.50855e+06	0	1.89019e+07	1.01294e+07	0	0	6.86316e+06	0	3.46097e+06	1.14776e+07	0	5.72398e+07	1.13061e+07	0	5.94707e+07	1.32908e+07	0	28817638	0	0	3.41725e+07	0	0	0	2.02035e+07	0	4.91637e+07	1.65706e+07	0	0	3.1524e+07	0	5.22587e+07	1.51929e+07	0
Q69ZK9	712	1	124.757	161.75	R	ALYYKRDRRQELRCRRLSPPGGSGSGVPGGG	R(1)LSPPGGSGSGVPGGGPLLPTAGR	2.18353e+07	0	0	1.78344e+07	0	0	1.61583e+07	0	0	1.09479e+07	0	0	2.31418e+07	0	0	1.91417e+07	0	0	2.05933e+07	0	0	1.69756e+07	0	0	3.21242e+07	0	0	2.06769e+07	0	0	1.506e+07	0	0	1.01642e+07	0	0
Q6NSW3	1199	0.5	0	92.439	R	LRDIAKESKDGASSRRSSHDWTTGLLSPSTR	R(0.5)SSH(0.5)DWTTGLLSPSTR	0	0	0	1.25001e+07	0	0	0	0	0	0	0	0	1.38601e+07	0	0	0	0	0	0	0	0	0	0	0	0	0	0	0	0	0	0	0	0	0	0	0
Q6P3Y9	2	0.999999	60.5041	74.78	R	______________MRPQELLLLLLMLKWSL	MR(1)PQELLLLLLMLK	3.46715e+07	0	0	108140827	0	0	3.08931e+07	0	0	7.90873e+07	0	0	5.44761e+07	0	0	1.06096e+08	0	0	7.8102e+07	0	0	3.0751e+07	0	0	2.01289e+07	0	0	4.3615e+07	0	0	2.53736e+07	0	0	4.77013e+07	0	0
Q6P4S6	549	1	77.1197	120.84	R	PPTLQLLNGMGPLGRRASDGGANIQLHAQQL	R(1)ASDGGANIQLHAQQLLK	1.95103e+07	0	0	2.00456e+07	0	0	5.02255e+06	0	0	7.99939e+07	0	0	9.10872e+07	0	0	8.81187e+07	0	0	0	0	0	0	0	0	7.37173e+07	0	0	1.01534e+08	0	0	8.78906e+07	0	0	8.73016e+07	0	0
Q6P4T0	1604	0.940351	11.9973	81.304	R	MVPGDTSEAPRETHSRPGSPQEGQSEDTETA	ETH(0.059)SR(0.94)PGSPQEGQSEDTETASNPPEAPGSSHSSSDQQPIYFR	0	0	0	0	0	0	0	0	0	0	0	0	0	0	0	9.81228e+06	0	0	4.36681e+07	0	0	0	0	0	0	0	0	0	0	0	1.58458e+07	0	0	1.84385e+07	0	0
Q6P8M1	162	0.862546	7.97625	76.332	R	FLHCRNSHTEFLDIMRRNRDRYVGGVVHSFD	NSHTEFLDIMR(0.863)R(0.137)	2.1953e+07	0	0	0	0	0	0	0	0	1.46535e+06	0	0	2.35531e+07	0	0	1.73589e+07	0	0	0	0	0	0	0	0	0	0	0	2.43088e+07	0	0	1.239e+07	0	0	1.04853e+07	0	0
Q6P9K8	1264	0.570199	1.22967	103.99	R	SKKVPLPGPGSPEVKRAHGTPPPVSPKPPPP	R(0.57)AH(0.43)GTPPPVSPKPPPPPTAPK	0	0	0	4.61872e+06	0	0	1.93071e+07	0	0	3.60187e+07	0	0	2.16706e+07	0	0	2.93416e+06	0	0	7.76595e+06	0	0	1.62043e+07	0	0	1.59869e+07	0	0	1.45289e+07	0	0	3.48308e+07	0	0	0	0	0
Q6PDL0	198	0.999855	41.1564	85.263	R	DYIEPEEGCQGSPQRRGPLTSGSDEDSVALP	R(1)GPLTSGSDEDSVALPLGDNVLTHNLGIPVLVVCTK	0	0	0	1.28152e+07	0	0	1.14549e+07	0	0	6.54786e+06	0	0	6.50796e+06	0	0	5330494	0	0	0	0	0	9.16889e+06	0	0	2.46417e+07	0	0	0	0	0	0	0	0	0	0	0
Q6PDM2	198	0.99998	48.6277	103.44	R	HEGETAYIRVKVDGPRSPSYGRSRSRSRSRS	VKVDGPR(1)SPSYGR	1.47993e+08	0	0	2.73624e+08	0	0	8.69362e+06	0	0	3.08328e+06	0	0	2.30235e+06	0	0	146907863	0	0	1.55898e+08	0	0	1.47737e+08	0	0	2.4031e+06	0	0	1.09197e+08	0	0	1.91771e+08	0	0	1.10402e+08	0	0
Q6PE13	796	0.990211	20.0501	75.319	R	RGSVGPAPSLSELDLRPPSPINLSRSIDAAL	GSVGPAPSLSELDLR(0.99)PPSPINLSR(0.01)	1.08073e+07	0	0	4.62899e+07	0	0	2.16711e+07	0	0	4.55499e+07	0	0	4.03687e+07	0	0	7.28933e+06	0	0	3.39743e+07	0	0	5.2641e+07	0	0	4.63049e+07	0	0	3.50353e+07	0	0	2.5116e+07	0	0	3.85687e+07	0	0
Q6PER3	160	0.99047	20.1674	146.84	R	IFNKSKKLIGTAVPQRTSPTGPKNMQTSGRL	KLIGTAVPQR(0.99)TSPTGPK(0.01)	541527309	0	0	4.31396e+07	0	0	3.46612e+08	0	0	1.85876e+08	0	0	4.75623e+08	0	0	4.92288e+08	0	0	2.72432e+08	0	0	2.97573e+08	0	0	1.52677e+08	0	0	3.88717e+08	0	0	1.39756e+08	0	0	7.68039e+07	0	0
Q6PEV3	153	0.996938	25.8706	80.382	R	TDSNRASLPELPRMQRPSLPDLSRPNTASGT	MQR(0.997)PSLPDLSR(0.003)PNTASGTGMK	0	0	0	0	0	0	0	0	0	1.74431e+07	0	0	0	0	0	0	0	0	0	0	0	0	0	0	0	0	0	0	0	0	0	0	0	0	0	0
Q6PEV3	161	0.540747	0.709422	149.82	R	PELPRMQRPSLPDLSRPNTASGTGMKHSSSA	MQRPSLPDLSR(0.541)PNTASGTGMK(0.459)	0	0	0	0	0	0	0	0	0	0	0	0	0	0	0	4.61439e+06	0	0	0	0	0	2.41887e+06	0	0	0	0	0	0	0	0	0	0	0	0	0	0
Q6PFR5	197	0.995702	23.7031	114.97	R	ELDGRRIRVDYSITKRAHTPTPGIYMGRPTH	R(0.996)AH(0.004)TPTPGIYMGR	9.36383e+07	0	0	2.80587e+07	0	0	1.54316e+08	0	0	1.53018e+08	0	0	1.12498e+08	0	0	1.49586e+08	0	0	1.40375e+08	0	0	1.54426e+08	0	0	2.05969e+08	0	0	7.44056e+07	0	0	0	0	0	7.74346e+07	0	0
Q6PHU5	789	0.498897	0	71.426	R	LIVKKYVCGGRFLVHRYSVLQQHAEADGVEA	FLVH(0.499)R(0.499)YSVLQQH(0.002)AEADGVEALDSTSHAK	0	0	0	0	0	0	0	0	0	0	0	0	0	0	0	0	0	0	0	0	0	0	0	0	0	0	0	0	0	0	0	0	0	0	0	0
Q6PIE5	493	0.927763	11.8657	99.392	R	IPFNSTNKYQLSIHEREDSPQSHVLVMKGAP	YQLSIH(0.06)ER(0.928)EDSPQSH(0.012)VLVMK	0	0	0	0	0	0	4.1558e+07	0	0	6.1196e+07	0	0	5.2778e+07	0	0	0	0	0	1.18605e+08	0	0	3.74769e+07	0	0	6.13778e+07	0	0	1.20667e+08	0	0	0	0	0	0	0	0
Q6PNC0	660	0.916514	12.8044	94.57	R	SVLPLLLTTSHHNALRTPNVGNQKQAHDAVN	FHLNDLACHSVLPLLLTTSH(0.018)H(0.048)NALR(0.917)TPNVGNQK(0.017)	2.62979e+07	0	0	3.04489e+07	0	0	2.95307e+07	0	0	4.9769e+07	0	0	1.17712e+07	0	0	0	0	0	0	0	0	5.16801e+07	0	0	4.51113e+07	0	0	0	0	0	0	0	0	6.25792e+06	0	0
Q6XP49	404	0.899312	9.67566	144.12	R	RYKPFNARYKLLIHMRVHSGEKPNKCTFEGC	LLIH(0.097)MR(0.899)VH(0.002)SGEK(0.002)	7.44844e+06	0	0	4.98581e+06	0	0	6.06758e+06	0	0	5.32686e+07	0	0	3.63565e+07	0	0	4.44941e+07	0	0	1.22452e+07	0	0	1.02769e+07	0	0	1.30954e+07	0	0	1.2524e+07	0	0	1.82231e+07	0	0	1.56487e+07	0	0
Q6Y7W8	380	0.989002	19.5811	103.68	R	AEASEEVPQTSLSSARPGTPSDHQPQEATQF	AGAEASEEVPQTSLSSAR(0.989)PGTPSDH(0.011)QPQEATQFER	2.1279e+07	0	0	0	0	0	0	0	0	0	0	0	0	0	0	0	0	0	0	0	0	0	0	0	0	0	0	0	0	0	0	0	0	0	0	0
Q6ZPG2	759	0.8684	7.44385	40.112	R	LGFLDVPSREYTVLARSHMAPVLALSTEPNR	EYTVLAR(0.868)SH(0.286)MAPVLALSTEPNR(0.844)GQMATVSLDH(0.148)TVR(0.855)	0	0	5.0131e+06	0	0	0	0	0	0	0	0	0	0	0	0	0	0	0	0	0	0	0	0	0	0	0	0	0	0	0	0	0	6.57999e+06	0	0	0
Q6ZPG2	774	0.843506	6.6857	40.112	R	RSHMAPVLALSTEPNRGQMATVSLDHTVRIW	EYTVLAR(0.868)SH(0.286)MAPVLALSTEPNR(0.844)GQMATVSLDH(0.148)TVR(0.855)	0	0	5.0131e+06	0	0	0	0	0	0	0	0	0	0	0	0	0	0	0	0	0	0	0	0	0	0	0	0	0	0	0	0	0	6.57999e+06	0	0	0
Q6ZPQ6	651	0.810734	6.3195	113.3	R	RSNGTEDSRRQLPRKRSDSSTYELDTIQQHQ	K(0.189)R(0.811)SDSSTYELDTIQQHQAFLSSLHASVLR	8.49263e+06	0	0	9.88976e+06	0	0	1.40723e+08	0	0	2.14527e+07	0	0	2.09591e+07	0	0	2.28951e+07	0	0	8.13019e+07	0	0	3.38466e+07	0	0	1.05019e+08	0	0	4.35113e+07	0	0	5.6666e+07	0	0	1.27296e+07	0	0
Q6ZPZ3	156	0.999987	48.9426	96.591	R	DDSDFSPSEKSHRKYRDYSPPYAPSHQQYSS	YR(1)DYSPPYAPSHQQYSSSHNAPLPK	3.38287e+07	0	0	4.51299e+07	0	0	5.54365e+07	0	0	1.84185e+07	0	0	0	0	0	4.56752e+07	0	0	3.14655e+07	0	0	3.84401e+07	0	0	2.65439e+07	0	0	1.36994e+07	0	0	2.6423e+07	0	0	2.29061e+07	0	0
Q6ZQ18	213	0.922226	10.8568	76.351	R	PSLLFNLQHVEEAESRSPSPLQAPEKEKENP	IVPSLLFNLQH(0.002)VEEAESR(0.922)SPSPLQAPEK(0.076)	0	0	0	0	0	0	0	0	0	0	0	0	1.38781e+07	0	0	8.02582e+06	0	0	0	0	0	0	0	0	0	0	0	0	0	0	1.27781e+07	0	0	1.81344e+07	0	0
Q6ZQM0	252	0.99844	28.0636	67.449	R	ETQSVDSEDSFVPGRRASLSDLTHLEDIEGL	R(0.998)ASLSDLTH(0.002)LEDIEGLTVR	3.033e+06	0	0	1.5638e+07	0	0	6.53486e+06	0	0	2.37391e+07	0	0	2.2556e+07	0	0	2.36326e+07	0	0	1.67704e+07	0	0	0	0	0	0	0	0	3.54884e+07	0	0	2.26135e+07	0	0	3.56574e+07	0	0
Q7M6Y5	294	1	67.7372	67.997	R	DDLLRIIEMERLHLHRELLRMGEVQTAQDNR	IIEMER(0.001)LH(0.999)LH(1)R(1)ELLR(1)	0	0	4.43308e+07	0	0	8.82851e+07	0	0	3.97939e+07	0	0	4.34257e+07	0	0	1.78862e+07	0	0	3.0137e+07	0	0	3.96575e+07	0	0	4.21898e+07	0	0	7.80003e+07	0	0	0	0	0	5.22964e+07	0	0	3.61117e+07
Q7M750	88	0.994346	22.5001	134.13	R	EISELYDNPKISENPRRSPTHEMNPRGSQEG	ISENPR(0.994)R(0.006)SPTHEMNPR	1.00655e+07	0	0	1.9105e+07	0	0	1.49167e+07	0	0	3.06345e+07	0	0	2.32308e+07	0	0	2.56012e+07	0	0	1.05233e+07	0	0	7.5634e+06	0	0	5.55504e+06	0	0	1.58931e+07	0	0	3.01216e+07	0	0	1.67669e+07	0	0
Q7M750	89	0.985492	19.4246	104.7	R	ISELYDNPKISENPRRSPTHEMNPRGSQEGH	ISENPR(0.011)R(0.985)SPTH(0.003)EMNPR	6.05964e+07	0	0	8.74136e+07	0	0	6.67445e+07	0	0	2.1172e+08	0	0	1.57108e+08	0	0	137184623	0	0	5.53778e+07	0	0	3.08801e+07	0	0	3.45945e+07	0	0	138030639	0	0	1.33389e+08	0	0	1.29393e+08	0	0
Q7TMJ8	56	0.99999	50.5442	97.352	R	APGLRCLNWLAAQGSRESLTEPSPGNHNYCR	CLNWLAAQGSR(1)ESLTEPSPGNHNYCR	0	0	0	6.47763e+06	0	0	0	0	0	0	0	0	3.79901e+06	0	0	0	0	0	0	0	0	0	0	0	0	0	0	0	0	0	0	0	0	4.03185e+06	0	0
Q7TNB4	69	0.999967	44.8051	72.547	R	ERARDPNAKKRHLAMRGLGALAREAPDKQVR	HLAMR(1)GLGALAR(1)	0	0	0	0	0	0	0	5.65954e+06	0	0	0	0	0	1.33379e+07	0	0	3.93616e+06	0	0	0	0	0	0	0	0	0	0	0	0	0	0	0	0	0	0	0
Q7TQD2	29	1	108.585	139.12	R	KTPPKSPGDPARAAKRLSLESEGANEGATAA	R(1)LSLESEGANEGATAAPELSALEEAFR	5.29079e+07	0	0	4.95243e+07	0	0	2.71742e+07	0	0	5.49283e+07	0	0	4.66256e+07	0	0	5.94487e+07	0	0	1.48897e+08	0	0	1.63141e+08	0	0	9.81949e+07	0	0	1.08949e+08	0	0	9.57256e+07	0	0	1.04064e+08	0	0
Q80TE7	829	0.454044	0	73.936	R	ERIVGVPLELEQSTHRHTPETEVPPSNPWQN	IVGVPLELEQSTH(0.092)R(0.454)H(0.454)TPETEVPPSNPWQNWTR	0	0	0	0	0	0	0	0	0	0	0	0	0	0	0	0	0	0	0	0	0	0	0	0	0	0	0	0	0	0	0	0	0	0	0	0
Q80TG9	745	0.822481	6.6588	115.88	R	FAAAAAAVPGGYSPPRRVSNIWTKRSLSVNG	SHSFDMGDFAAAAAAVPGGYSPPR(0.822)R(0.178)	3.03494e+07	0	0	1.34198e+07	0	0	0	0	0	2.36954e+07	0	0	1.65047e+07	0	0	1.89238e+07	0	0	2.16775e+07	0	0	2.71213e+07	0	0	2.81949e+07	0	0	0	0	0	0	0	0	5.52645e+06	0	0
Q80TL0	524	0.545729	0.796645	89.846	R	QEDGGDDKETHGECKRPWPQHQCSAPADLGY	R(0.546)PWPQH(0.454)QCSAPADLGYEGR	0	0	0	0	0	0	0	0	0	0	0	0	0	0	0	0	0	0	0	0	0	0	0	0	0	0	0	0	0	0	8.71905e+06	0	0	6.65515e+08	0	0
Q80TL7	1178	0.815248	6.44743	65.938	R	ALKSFQEILQIVSPVRDSEKPEPPAVSVPVP	SFQEILQIVSPVR(0.815)DSEK(0.185)PEPPAVSVPVPVLLGNLSGPGLSR	0	0	0	0	0	0	0	0	0	8.30333e+06	0	0	5.66359e+06	0	0	0	0	0	1.25731e+07	0	0	0	0	0	0	0	0	0	0	0	0	0	0	7.72969e+06	0	0
Q80TR1	1365	0.992178	21.0325	89.434	R	LDESESCTAEDGATSRPLSSPPGRDSLYASG	AQSVLYQSDLDESESCTAEDGATSR(0.992)PLSSPPGR(0.008)	11100002	0	0	1.90264e+07	0	0	8.08697e+06	0	0	1.11977e+07	0	0	1.76112e+07	0	0	0	0	0	0	0	0	0	0	0	0	0	0	0	0	0	0	0	0	5.43118e+06	0	0
Q80TY0	514	0.993267	22.6621	88.194	R	YDGQTHQTVTNCAQDRESPDGSYTEEQSQES	RQSGLYDGQTH(0.001)QTVTNCAQDR(0.993)ESPDGSYTEEQSQESEHK(0.005)	2.24567e+07	0	0	2.86158e+07	0	0	1.74976e+07	0	0	0	0	0	2.60026e+07	0	0	0	0	0	0	0	0	0	0	0	0	0	0	2.52909e+07	0	0	0	0	0	3.08694e+07	0	0
Q80TZ3	774	0.935991	11.6503	151.28	R	QSKPQSSMPHSSPQNRPNYNVSFSAMPAGQS	PQSSMPH(0.064)SSPQNR(0.936)PNYNVSFSAMPAGQSER	1.36347e+07	0	0	6.16291e+07	0	0	4.37789e+07	0	0	0	0	0	2.88227e+07	0	0	4.1723e+07	0	0	7.73191e+06	0	0	1.64442e+07	0	0	0	0	0	0	0	0	1.90811e+07	0	0	0	0	0
Q80U28	1057	0.5	0	159.58	R	IAQTHYYSKEPDKRKRSPTENVNTPVGKDPG	K(0.5)R(0.5)SPTENVNTPVGK	0	0	0	9.93567e+07	0	0	1.08661e+08	0	0	2.82133e+06	0	0	1.0655e+08	0	0	9.38208e+07	0	0	9.41808e+07	0	0	116736129	0	0	0	0	0	7.73457e+07	0	0	8.9462e+07	0	0	9.42356e+07	0	0
Q80U40	848	0.656827	4.47851	65.736	R	RHRPAMAPSIDEYTGRDHLSPDFYDESETDP	H(0.054)R(0.054)PAMAPSIDEYTGR(0.657)DH(0.234)LSPDFYDESETDPGAEELPAR	0	0	0	0	0	0	0	0	0	0	0	0	0	0	0	0	0	0	0	0	0	0	0	0	0	0	0	1.15149e+07	0	0	0	0	0	0	0	0
Q80U49	1287	1	90.8256	94.15	R	TPRGSSSTRARSQGPRDTDDDEEEPDPYGFI	SQGPR(1)DTDDDEEEPDPYGFIVQTAEIAEIAR	1.32389e+07	0	0	1.30681e+07	0	0	1.70973e+07	0	0	0	0	0	2.11076e+07	0	0	2.02199e+07	0	0	0	0	0	0	0	0	2.37727e+07	0	0	2.45893e+07	0	0	3.02437e+07	0	0	0	0	0
Q80U56	322	0.912837	10.2006	76.859	R	GQEPSDSGRYLELPPRPSPESSESDWETLDP	YLELPPR(0.913)PSPESSESDWETLDPSVLEDASLK(0.087)	1.77707e+07	0	0	0	0	0	0	0	0	0	0	0	0	0	0	0	0	0	2.35668e+07	0	0	0	0	0	0	0	0	0	0	0	1.50451e+07	0	0	2.2934e+07	0	0
Q80U58	13	0.989106	16.5888	60.937	R	___MNHDFQALALESRGMGELLPTKKFWEPD	NHDFQALALESR(0.989)GMGELLPTK(0.505)K(0.505)	0	1.75368e+07	0	0	1.60348e+07	0	0	1.32756e+07	0	0	0	0	0	1.39107e+07	0	0	1.24274e+07	0	0	2.63701e+07	0	0	1.88386e+07	0	0	1.34278e+07	0	0	1.21384e+07	0	0	9.88015e+06	0	0	1.34276e+07	0
Q80U95	113	1	65.2413	70.728	R	VRQLLFFYKQSEDSKRLIWLYQNLIKHSSLF	R(1)LIWLYQNLIK(1)H(1)SSLFVK(1)	0	0	0	0	0	0	0	0	0	0	0	9.9957e+06	0	0	8.24868e+06	0	0	1.07575e+07	0	0	0	0	0	3.27334e+06	0	0	6.43753e+06	0	0	0	0	0	0	0	0	7.51447e+06
Q80UP5	10	0.846629	10.0023	46.273	R	______MSSARDTSSRFPLHLLVWNNDYEQL	MSSAR(0.085)DTSSR(0.847)FPLH(0.069)LLVWNNDYEQLEK	0	0	0	2.00923e+08	0	0	1.71428e+08	0	0	0	0	0	4.4003e+08	0	0	6.05379e+08	0	0	0	0	0	1.69196e+07	0	0	0	0	0	3.43315e+08	0	0	0	0	0	6.10926e+08	0	0
Q80UW2	111	0.949142	14.3033	71.857	R	CQQEGLVPEGSADEERDHWQQFYFLSKRRRN	CQQEGLVPEGSADEER(0.949)DH(0.035)WQQFYFLSK(0.016)	2.90672e+07	0	0	3.00575e+07	0	0	0	0	0	0	0	0	29402808	0	0	3.76718e+07	0	0	5.04758e+07	0	0	5.54168e+07	0	0	40484673	0	0	5.56227e+07	0	0	3.4766e+07	0	0	0	0	0
Q80VP0	383	0.541919	0.729927	66.868	R	SGKTWKAIVVGRESDRSHSGSSSSLLSAGCF	ESDR(0.542)SH(0.458)SGSSSSLLSAGCFFGDEVR	6.65696e+06	0	0	0	0	0	7.27842e+06	0	0	0	0	0	4.19003e+06	0	0	6.42783e+06	0	0	0	0	0	0	0	0	1.20113e+07	0	0	9.76711e+06	0	0	9.4102e+06	0	0	9.00334e+06	0	0
Q80VW5	638	0.999965	44.6658	69.729	R	SSAAHSGIVFSAPRNRSPPPGTAPTPGPSSA	NR(1)SPPPGTAPTPGPSSAQDSPSSPIYASISHANPSSR	7.18826e+06	0	0	0	0	0	0	0	0	0	0	0	0	0	0	0	0	0	0	0	0	0	0	0	0	0	0	0	0	0	0	0	0	0	0	0
Q80WG7	109	0.694756	3.57941	69.981	R	DKINRPGWKRNSLTPRPTTFPCPGCEHDVDL	R(0.305)NSLTPR(0.695)PTTFPCPGCEH(0.001)DVDLGER	0	0	0	0	0	0	0	0	0	0	0	0	4.8477e+06	0	0	0	0	0	0	0	0	0	0	0	0	0	0	0	0	0	0	0	0	0	0	0
Q80X80	424	0.999967	42.4484	109.07	R	QGSPRNLGTPTSSTPRPSITPTKKIELDRTI	NLGTPTSSTPR(1)PSITPTK(0.577)K(0.423)	0	7.33426e+06	0	6.28849e+07	0	0	3.63679e+07	0	0	5.01931e+07	0	0	0	0	0	0	0	0	0	0	0	6.2935e+07	0	0	3.52343e+07	0	0	1.4352e+07	0	0	0	0	0	0	0	0
Q80XA6	248	0.999997	55.2382	78.674	R	PFRRQASLIRSFSVEREPQENNSNYPDEPWR	SFSVER(1)EPQENNSNYPDEPWR	0	0	0	8.46671e+06	0	0	0	0	0	0	0	0	0	0	0	0	0	0	0	0	0	0	0	0	0	0	0	0	0	0	0	0	0	1.04683e+07	0	0
Q80XD1	301	0.993417	22.7175	43.31	R	MNAENLGIVFGPTLMRPPEDSTLTTLHDMRY	DNLMNAENLGIVFGPTLMR(0.993)PPEDSTLTTLH(0.005)DMR(0.001)	0	0	0	0	0	0	0	0	0	0	0	0	0	0	0	0	0	0	0	0	0	0	0	0	0	0	0	0	0	0	0	0	0	3.4057e+07	0	0
Q80XU8	608	0.925909	10.9686	121.5	R	GCYGYARRLGGAWARRSHSVHGGLLGAGCRG	R(0.926)SH(0.074)SVHGGLLGAGCR	0	0	0	0	0	0	1.1753e+07	0	0	1.21216e+07	0	0	1.32628e+07	0	0	3.94616e+06	0	0	1.40222e+07	0	0	1.15684e+07	0	0	1.08242e+07	0	0	0	0	0	0	0	0	0	0	0
Q80Y98	452	0.891843	9.58945	84.653	R	ILNHFSARKNSVSINRPAMSASEVNISKENG	K(0.098)NSVSINR(0.892)PAMSASEVNISK(0.01)	0	0	0	0	0	0	0	0	0	0	0	0	0	0	0	0	0	0	0	0	0	0	0	0	0	0	0	0	0	0	0	0	0	8.68992e+07	0	0
Q80Z25	681	1	56.9556	56.956	R	QPAKSPPSVNSVAALRSIASSSMDRPVSAED	SPPSVNSVAALR(1)SIASSSMDR(1)	0	0	0	0	0	0	0	1.42228e+06	0	0	2.58015e+06	0	0	3.64887e+06	0	0	2.60699e+06	0	0	0	0	0	1.16917e+06	0	0	0	0	0	0	0	0	0	0	0	2.28404e+06	0
Q80Z71	111	1	81.5099	81.51	R	QKNCDLADSVQDLLARMKKLEEEMAELKEQC	NCDLADSVQDLLAR(1)MK(1)	0	0	0	0	0	0	0	0	0	0	4.22872e+07	0	0	0	0	0	1.48107e+07	0	0	2.19129e+07	0	0	0	0	0	0	0	0	4.69145e+07	0	0	0	0	0	0	0
Q811P8	951	0.999956	43.5508	150.09	R	PTSWDKSVEERDVINRSPTQLQLGKMKAGER	DVINR(1)SPTQLQLGK	2.51229e+07	0	0	0	0	0	0	0	0	1.27423e+07	0	0	0	0	0	2.97983e+07	0	0	3.10133e+07	0	0	0	0	0	2.92843e+07	0	0	0	0	0	2.01044e+07	0	0	9.26337e+06	0	0
Q812E0	20	1	104.861	159.75	R	QQQPPAAAPQQPQSRRSPVSPQLQQQHQAAA	R(1)SPVSPQLQQQHQAAAAAFLQQR	0	0	0	1.68766e+07	0	0	4.96308e+06	0	0	1.69348e+07	0	0	1.52448e+07	0	0	1.78956e+07	0	0	0	0	0	1.25728e+07	0	0	1.36606e+07	0	0	0	0	0	0	0	0	0	0	0
Q8BG81	125	0.5	0	108.34	R	KPRQVADAREKISLKRRSPAAFTSPPIGTVT	R(0.5)R(0.5)SPAAFTSPPIGTVTPALK	5.06354e+06	0	0	0	0	0	0	0	0	0	0	0	6.10569e+06	0	0	5.28463e+06	0	0	0	0	0	0	0	0	0	0	0	5.00343e+06	0	0	1.85679e+07	0	0	7.34306e+06	0	0
Q8BG81	126	0.5	0	108.34	R	PRQVADAREKISLKRRSPAAFTSPPIGTVTP	R(0.5)R(0.5)SPAAFTSPPIGTVTPALK	5.06354e+06	0	0	0	0	0	0	0	0	0	0	0	6.10569e+06	0	0	5.28463e+06	0	0	0	0	0	0	0	0	0	0	0	5.00343e+06	0	0	1.85679e+07	0	0	7.34306e+06	0	0
Q8BGU5	47	0.748757	4.74252	61.526	R	LSREDTGCNLQHISDRENIDDLNMEFNPSDH	EDTGCNLQH(0.251)ISDR(0.749)ENIDDLNMEFNPSDHPR	0	0	0	0	0	0	7.36137e+06	0	0	8.46209e+06	0	0	1.06884e+07	0	0	0	0	0	0	0	0	0	0	0	0	0	0	0	0	0	0	0	0	0	0	0
Q8BGU5	34	0.99663	25.2566	71.946	R	AHSRLESYRPDTDLSREDTGCNLQHISDREN	LESYR(0.003)PDTDLSR(0.997)EDTGCNLQHISDR	5.02119e+07	0	0	122052317	0	0	7.90811e+07	0	0	0	0	0	4.79817e+07	0	0	3.68764e+07	0	0	4.94052e+07	0	0	0	0	0	0	0	0	2.0444e+07	0	0	0	0	0	0	0	0
Q8BH57	333	0.988958	19.5213	112.8	R	KSTVNKWTLKGIHNFRASGDYDNDCTNPITP	GIH(0.011)NFR(0.989)ASGDYDNDCTNPITPLCTQPDQVIK	6.96752e+06	0	0	1.10078e+07	0	0	1.09563e+07	0	0	1.16897e+07	0	0	1.33355e+07	0	0	0	0	0	0	0	0	9.59842e+06	0	0	0	0	0	1.05384e+07	0	0	0	0	0	1.60782e+07	0	0
Q8BH65	367	0.999983	47.6866	78.342	R	NPFFAKTLQHWPHIIRIGDLKPAGEIPKQVK	TLQH(1)WPH(1)IIR(1)IGDLK	0	0	3.86711e+07	0	0	1.59811e+07	0	0	2.82884e+07	0	0	105683778	0	0	4.69063e+07	0	0	1.24433e+08	0	0	4.17993e+07	0	0	5.85378e+06	0	0	2.36216e+07	0	0	109367763	0	0	1.3572e+07	0	0	2.80811e+07
Q8BHF7	44	0.499999	0	57.427	R	GRLSDRLGRSRERRRRRSPWLLLAPLLSPTV	R(0.5)R(0.5)SPWLLLAPLLSPTVPQVTSPPCCLCPEGVHR	0	0	0	9.74427e+06	0	0	0	0	0	0	0	0	0	0	0	9.76871e+06	0	0	0	0	0	0	0	0	0	0	0	0	0	0	0	0	0	0	0	0
Q8BHF7	45	0.499999	0	57.427	R	RLSDRLGRSRERRRRRSPWLLLAPLLSPTVP	R(0.5)R(0.5)SPWLLLAPLLSPTVPQVTSPPCCLCPEGVHR	0	0	0	9.74427e+06	0	0	0	0	0	0	0	0	0	0	0	9.76871e+06	0	0	0	0	0	0	0	0	0	0	0	0	0	0	0	0	0	0	0	0
Q8BHL3	671	0.991521	23.5306	50.35	R	SRAVGGAPSPPPPVRRASAGPVPGAVVIAEG	R(0.992)ASAGPVPGAVVIAEGLH(0.004)PSLPSPTGNSTPLGTSK(0.004)	0	0	0	0	0	0	0	0	0	0	0	0	6.11385e+06	0	0	0	0	0	0	0	0	0	0	0	0	0	0	0	0	0	0	0	0	0	0	0
Q8BHZ0	10	0.559513	0	59.228	R	______MGNLLKVLTREIENYPHFFLDFENA	MGNLLK(0.56)VLTR(0.56)EIENYPH(0.881)FFLDFENAQPTEGER	0	0	0	0	0	0	0	0	0	0	0	0	0	0	0	0	0	0	0	0	0	0	0	0	0	0	0	0	0	0	0	0	0	0	0	0
Q8BJ42	809	0.990707	20.2777	176.89	R	VSMEDKGLQFGSSFQRHSEPSTPTQYGALRT	GLQFGSSFQR(0.991)H(0.009)SEPSTPTQYGALR	3.92953e+07	0	0	9.4914e+07	0	0	1.06008e+08	0	0	2.66583e+07	0	0	2.53694e+07	0	0	3.04149e+07	0	0	1.75392e+08	0	0	9.28264e+07	0	0	115161037	0	0	1.41716e+07	0	0	2.78925e+07	0	0	0	0	0
Q8BM89	519	1	101.132	105.1	R	VDLSSRYPGIVKKLLRRLSQFNKTAVPVRYP	LLR(1)R(1)LSQFNK	0	0	0	0	0	0	0	0	0	0	0	0	0	0	0	0	0	0	0	0	0	0	0	0	0	0	0	0	0	0	0	0	0	0	0	0
Q8BM89	520	1	101.132	105.1	R	DLSSRYPGIVKKLLRRLSQFNKTAVPVRYPP	LLR(1)R(1)LSQFNK	0	0	0	0	0	0	0	0	0	0	0	0	0	0	0	0	0	0	0	0	0	0	0	0	0	0	0	0	0	0	0	0	0	0	0	0
Q8BN59	208	0.867476	8.15931	91.658	R	LSPKLWALATPQKNGRVQEKVMEHLLKLFGT	NGR(0.867)VQEK(0.133)VMEH(1)LLK	0	0	0	0	1.66136e+07	0	0	0	0	0	1.69726e+07	0	0	0	0	0	1.27721e+07	0	0	0	0	0	0	0	0	0	0	0	9.82321e+06	0	0	1.27192e+07	0	0	0	0
Q8BNW9	101	1	44.8148	88.986	R	DVSSAASPESPEECARPEEPASPEDPPSRHE	VVETQWDVSSAASPESPEECAR(1)PEEPASPEDPPSR(1)	7.3744e+06	0	0	1.40936e+07	0	0	0	0	0	0	0	0	1.02796e+07	6.40556e+06	0	6.6179e+06	0	0	0	0	0	0	0	0	0	0	0	0	0	0	0	0	0	0	0	0
Q8BNX1	129	0.999935	41.281	129.88	R	AKLMEQESILKELQERVTQDLAKASRDRENI	ELQER(1)VTQDLAK(0.13)ASR(0.87)	0	0	0	0	0	0	0	0	0	0	0	0	0	0	0	0	0	0	0	0	0	0	0	0	0	0	0	0	0	0	0	0	0	0	0	0
Q8BPN8	219	1	116.747	141	R	KSSIIPQDPHEVKRRRASTQFSFVYLAHPRA	R(1)ASTQFSFVYLAHPR	6.88808e+07	0	0	1.12537e+08	0	0	1.18379e+08	0	0	1.11514e+08	0	0	4.99188e+07	0	0	9.91351e+07	0	0	1.6864e+08	0	0	1.3948e+08	0	0	1.77812e+08	0	0	8.5946e+07	0	0	8.55818e+07	0	0	6.57242e+07	0	0
Q8BQU6	409	0.999583	33.7842	54.376	R	GTGSATSGGTVGEQSRPGAQEQLATKPRAGS	VGGLASGTGSATSGGTVGEQSR(1)PGAQEQLATK(0.996)PR(0.004)	0	0	0	0	0	0	0	0	0	0	7.28633e+06	0	0	7.63311e+06	0	0	0	0	0	0	0	0	0	0	0	0	0	0	0	0	0	0	0	0	0	0
Q8BRV5	178	0.999996	54.5293	131.56	R	ISHSLRRSQFSESESRSPLEEESHSTWMFKD	SQFSESESR(1)SPLEEESHSTWMFK	3.32177e+07	0	0	3.82488e+07	0	0	2.65549e+07	0	0	1.74989e+07	0	0	2.3908e+07	0	0	1.5863e+07	0	0	2.82367e+07	0	0	3.51861e+07	0	0	3.15804e+07	0	0	1.4597e+07	0	0	2.3321e+07	0	0	1.54103e+07	0	0
Q8BS95	192	1	75.2045	81.525	R	FLRNVTDTDILALERRLLQTMDMIISKKKRM	R(1)LLQTMDMIISK	1.54899e+07	0	0	1.26596e+07	0	0	1.53765e+07	0	0	3.24418e+07	0	0	1.77311e+07	0	0	0	0	0	2.27203e+06	0	0	1.83225e+07	0	0	1.06192e+07	0	0	1.79882e+07	0	0	0	0	0	9.47773e+06	0	0
Q8BS95	217	0.999466	32.7207	126.39	R	SKKKRMAVARRTMFQRGDVQNKPSGLWGMLK	R(0.001)TMFQR(0.999)GDVQNK	4.11636e+06	0	0	1.50062e+07	0	0	3.18985e+06	0	0	1.6794e+07	0	0	1.75377e+07	0	0	1.07735e+07	0	0	3.26694e+06	0	0	3.62834e+06	0	0	3.41093e+06	0	0	1.1186e+07	0	0	7.66371e+06	0	0	9.21616e+06	0	0
Q8BTG7	296	1	78.9211	106.79	R	YFLQGMGYIAHLKDRRLSGGAVPSASMTRLA	R(1)LSGGAVPSASMTR	0	0	0	3.32359e+08	0	0	362933681	0	0	666145227	0	0	374352563	0	0	4.1641e+08	0	0	2.69885e+08	0	0	3.25665e+08	0	0	4.60851e+08	0	0	7.3525e+07	0	0	0	0	0	4.76224e+08	0	0
Q8BTI8	1156	0.999445	32.5562	131.79	R	ASSCIPRDKFSPTQDRPESSTVLKVTPRVLL	DK(0.001)FSPTQDR(0.999)PESSTVLK	9.60879e+06	0	0	1.87579e+07	0	0	2.18969e+07	0	0	5.3904e+07	0	0	2.72592e+07	0	0	3.84952e+07	0	0	1.36784e+07	0	0	3.54441e+07	0	0	2.92784e+07	0	0	6.22722e+07	0	0	1.58279e+07	0	0	1.57191e+07	0	0
Q8BTI8	1281	0.733875	7.18118	124.38	R	PQVSPEHKELSHSPPRENSFESSLEFKNSGP	ELSH(0.126)SPPR(0.734)ENSFESSLEFK(0.14)	0	0	0	5.52071e+07	0	0	0	0	0	0	0	0	0	0	0	0	0	0	0	0	0	0	0	0	0	0	0	0	0	0	0	0	0	0	0	0
Q8BTI8	958	0.758914	6.16099	86.548	R	RSSSPDSKMELGTPLRHSGSTSPYLKSMLQT	MELGTPLR(0.759)H(0.184)SGSTSPYLK(0.057)	0	0	0	0	0	0	2.60317e+07	0	0	0	0	0	9.25233e+06	0	0	0	0	0	3.8996e+07	0	0	4.3634e+07	0	0	0	0	0	0	0	0	9.28284e+06	0	0	6.12234e+06	0	0
Q8BTI8	826	1	94.9902	112.45	R	RSNSPQPKVKSGTPPRPGSVTNMQADECTAT	SGTPPR(1)PGSVTNMQADECTATPQR	0	0	0	1.28222e+07	0	0	1.06202e+07	0	0	6.78234e+06	0	0	8.15329e+06	0	0	0	0	0	0	0	0	0	0	0	0	0	0	0	0	0	0	0	0	0	0	0
Q8BTI8	991	0.963981	14.2755	86.359	R	DQNLSGSKSPCPQKSRDSPTGSSGSFHLCPG	SR(0.964)DSPTGSSGSFH(0.036)LCPGVTPSSIVPGESCFSASFVQQK	7.83249e+07	0	0	2.31804e+08	0	0	1.52744e+08	0	0	0	0	0	0	0	0	0	0	0	0	0	0	1.26945e+08	0	0	5.43307e+07	0	0	8.23951e+07	0	0	67850975	0	0	2.75084e+07	0	0
Q8BX17	1089	0.994694	22.706	51.125	R	AAIAGEHELAASLALRCAQELLLMKNWVGAQ	GDAASLR(0.011)TAAELAAIAGEH(0.995)ELAASLALR(0.995)CAQELLLMK(1)	0	0	8.366e+07	0	0	1.09689e+08	0	0	1.68961e+07	0	0	0	0	0	3.97469e+07	0	0	0	0	0	137589144	0	0	2.03541e+08	0	0	1.22915e+08	0	0	2.7141e+07	0	0	6.30978e+07	0	0	0
Q8BZ03	195	1	70.6901	90.444	R	CAFSIPNNCSGARKRRLSSTSLASGHSVRLG	R(1)LSSTSLASGHSVR	1.45793e+07	0	0	2.64443e+07	0	0	1.53243e+07	0	0	1.85679e+07	0	0	1.96927e+07	0	0	2.32878e+07	0	0	2.86077e+07	0	0	2.42923e+07	0	0	2.55131e+07	0	0	1.59009e+07	0	0	0	0	0	2.21044e+07	0	0
Q8BZM1	263	0.682826	5.24556	87.719	R	SKIGHPVPQIILNHGRKKRTWDYLEFEEEED	IGH(1)PVPQIILNH(0.204)GR(0.683)K(0.113)	0	0	0	0	0	0	0	0	0	0	0	0	0	0	0	0	0	0	0	0	0	0	0	0	0	8.00736e+06	0	0	0	0	0	0	0	0	0	0
Q8C078	90	0.776611	5.41141	57.238	R	ADGQELPLEASDPESRSPLSGRKMSLQEPSQ	DQPPEADGQELPLEASDPESR(0.777)SPLSGR(0.223)	0	0	0	0	0	0	0	0	0	0	0	0	2.31165e+07	0	0	0	0	0	0	0	0	0	0	0	0	0	0	0	0	0	2.99652e+07	0	0	2.13282e+07	0	0
Q8C078	494	0.923254	10.8027	110.64	R	PSLATVILVKTMIRKRSFGNPFEGSRREERS	K(0.077)R(0.923)SFGNPFEGSR	0	0	0	6.0792e+07	0	0	0	0	0	0	0	0	0	0	0	0	0	0	0	0	0	0	0	0	0	0	0	0	0	0	0	0	0	0	0	0
Q8C080	106	0.998613	29.3879	82.65	R	REAEEQHPEAVNWEDRPSTPTILGYEVMEER	EAEEQHPEAVNWEDR(0.999)PSTPTILGYEVMEER(0.001)	1.36015e+07	0	0	0	0	0	1.02162e+07	0	0	1.48433e+07	0	0	1.63334e+07	0	0	1.39243e+07	0	0	0	0	0	0	0	0	1.2461e+07	0	0	1.66921e+07	0	0	0	0	0	2.47735e+07	0	0
Q8C0D4	235	1	76.7043	79.462	R	SSTEQMRATTPPNQGRPDSPVYANLQELKIS	ATTPPNQGR(1)PDSPVYANLQELK(1)	0	0	0	0	6.85079e+06	0	0	0	0	0	0	0	0	6.44668e+06	0	0	5.59381e+06	0	0	0	0	0	0	0	0	7.56426e+06	0	0	0	0	0	0	0	0	1.11253e+07	0
Q8C0D5	11	0.99987	38.8448	96.171	R	_____MVLSGVDKMIRLQKNTANIRNICVLA	MVLSGVDK(1)MIR(1)LQK	0	0	0	0	2.44945e+07	0	0	9.66844e+06	0	0	2.1427e+07	0	0	1.62061e+07	0	0	0	0	0	1.00002e+07	0	0	11571183	0	0	3.0395e+07	0	0	1.06754e+07	0	0	1.66382e+07	0	0	1.81529e+07	0
Q8C0V0	185	0.977828	19.1638	80.721	R	SPQNSHSHSTPSSSVRPNSPSPTALAFGDHP	SPQNSH(0.012)SH(0.01)STPSSSVR(0.978)PNSPSPTALAFGDHPVVQPK	0	0	0	2.44618e+07	0	0	0	0	0	0	0	0	0	0	0	0	0	0	0	0	0	0	0	0	4.11096e+06	0	0	0	0	0	1.23491e+07	0	0	0	0	0
Q8C181	84	0.99997	44.3888	54.117	R	LHPPTHLKTQLEINGRNNLIQQKTAAAMLAQ	YLH(0.847)PPTH(0.184)LK(0.969)TQLEINGR(1)NNLIQQK(1)	0	0	5.51263e+07	0	0	115096572	0	0	1.23999e+08	0	0	1.3297e+08	0	0	0	0	0	0	0	0	9.01243e+07	0	0	5.16648e+07	0	0	1.16956e+08	0	0	5.9886e+07	0	0	0	0	0	1.64171e+08
Q8C1B1	990	1	66.4191	106.2	R	TLTPPRSVDSLPRLRRFSPSQVPIQTRSFVC	R(1)FSPSQVPIQTR	6.5407e+06	0	0	0	0	0	0	0	0	0	0	0	0	0	0	0	0	0	0	0	0	0	0	0	0	0	0	0	0	0	1.88837e+07	0	0	1.15099e+07	0	0
Q8C1Y8	262	0.984198	18.7538	85.932	R	TTSLFPRHIEPELAGRDSPVRAEMPGNLQHY	H(0.003)IEPELAGR(0.984)DSPVR(0.013)AEMPGNLQHYGR	0	0	0	0	0	0	3.5481e+07	0	0	2.8209e+07	0	0	0	0	0	0	0	0	0	0	0	0	0	0	0	0	0	4.19227e+07	0	0	4.70219e+07	0	0	4.20791e+07	0	0
Q8C1Y8	267	0.985674	18.3799	112.56	R	PRHIEPELAGRDSPVRAEMPGNLQHYGRFLT	HIEPELAGR(0.014)DSPVR(0.986)AEMPGNLQHYGR	4.35067e+07	0	0	4.67163e+07	0	0	2.81229e+07	0	0	3.17884e+07	0	0	3.02547e+07	0	0	2.99752e+07	0	0	3.22189e+07	0	0	0	0	0	3.31532e+07	0	0	4.78484e+07	0	0	3.86008e+07	0	0	3.8181e+07	0	0
Q8C4G9	236	0.970517	15.1746	148.66	R	QQRLAVPESGHRHGVRPGTPPTCDALAASQL	H(0.029)GVR(0.971)PGTPPTCDALAASQLQNEHSFK	151349195	0	0	2.06595e+08	0	0	1.42765e+08	0	0	1.7559e+08	0	0	1.59009e+08	0	0	3.52095e+08	0	0	2.73454e+08	0	0	2.66267e+08	0	0	2.28343e+08	0	0	333394132	0	0	3.00151e+08	0	0	260279727	0	0
Q8C7W7	397	0.508448	0	66.152	R	WAGHLERLCPHPLQARKQLFPDFCRKERDEP	ENLSPWAGHLER(0.002)LCPH(0.981)PLQAR(0.508)K(0.508)	0	0	0	0	3.76061e+06	0	0	8.48346e+06	0	0	0	0	0	2.98948e+07	0	0	0	0	0	2.30204e+07	0	0	1.34427e+07	0	0	5.07698e+07	0	0	4.37819e+07	0	0	0	0	0	2.03005e+07	0
Q8C863	706	0.99992	40.9452	66.682	R	TEENKEEYIRMVAEWRLSRGVEEQTQAFFEG	MVAEWR(1)LSR	0	0	0	0	0	0	0	0	0	0	0	0	3.04938e+06	0	0	0	0	0	0	0	0	2.5294e+06	0	0	0	0	0	3.63364e+06	0	0	3.70517e+06	0	0	0	0	0
Q8C8R3	3762	0.986658	19.5896	80.538	R	PEGTKPCLQTPVTSERGSPIVQEPEEASEPK	TPEDISTPPEGTK(0.011)PCLQTPVTSER(0.987)GSPIVQEPEEASEPK(0.002)	0	0	0	1.72011e+07	0	0	0	0	0	9.90726e+06	0	0	1.06844e+07	0	0	1.85851e+07	0	0	6.22501e+06	0	0	0	0	0	0	0	0	0	0	0	0	0	0	1.58321e+07	0	0
Q8C8R3	2363	0.981072	18.0809	96.848	R	VKTAEGTEPKPQGAIRSPQGLELPLPNRDSE	TAEGTEPK(0.015)PQGAIR(0.981)SPQGLELPLPNR(0.004)	4.55542e+07	0	0	2.67555e+07	0	0	1.97714e+07	0	0	2.3388e+07	0	0	4.39908e+07	0	0	0	0	0	0	0	0	1.11666e+08	0	0	0	0	0	9.72521e+07	0	0	6.55183e+07	0	0	7.06013e+07	0	0
Q8C996	10	0.999999	63.2823	110.8	R	______MEPALGSERRSPPGPGVPRPPPRGH	R(1)SPPGPGVPRPPPR	4.4346e+08	0	0	4.10303e+08	0	0	3.53133e+08	0	0	4.69451e+08	0	0	4.09921e+08	0	0	5.54445e+08	0	0	2.08877e+08	0	0	9.26113e+07	0	0	4.02696e+08	0	0	2.17514e+08	0	0	3.15836e+08	0	0	5.72208e+08	0	0
Q8CC35	670	1	92.9878	145.86	R	GAEASNFQQEPIARDRASPAAAEEAVPEWAS	DR(1)ASPAAAEEAVPEWASCLK	1.75769e+07	0	0	2.90173e+07	0	0	2.57775e+07	0	0	0	0	0	0	0	0	0	0	0	2.84228e+07	0	0	2.64892e+07	0	0	1.62529e+07	0	0	0	0	0	0	0	0	0	0	0
Q8CC35	768	0.990722	20.287	73.865	R	TNAPGGFRVASLSPARTPPASLYHGYLPENG	VASLSPAR(0.991)TPPASLYH(0.009)GYLPENGVLRPEPTK	0	0	0	7.3797e+06	0	0	7.58168e+06	0	0	0	0	0	0	0	0	0	0	0	0	0	0	0	0	0	0	0	0	0	0	0	0	0	0	0	0	0
Q8CC35	566	1	141.587	195.25	R	TYAETLSTAPVASRVRSPPSYSTLYPSSDPK	VR(1)SPPSYSTLYPSSDPKPSHLK	67649741	0	0	9.29378e+07	0	0	1.11456e+08	0	0	1.61732e+07	0	0	1.4331e+07	0	0	1.24344e+07	0	0	1.21085e+08	0	0	9.04213e+07	0	0	6.39784e+07	0	0	0	0	0	4.49798e+07	0	0	8.68683e+06	0	0
Q8CFE4	100	0.53965	0	81.525	R	SLKRGVQQLTRLRHPRLLTVQHPLEESRDCL	H(0.54)PR(0.54)LLTVQH(0.921)PLEESR(1)	0	0	0	0	0	0	0	0	0	0	0	0	0	0	0	0	0	0	0	0	0	0	0	0	0	0	0	0	0	0	0	0	0	0	0	0
Q8CGE9	951	0.955831	13.3526	73.672	R	GSVSSAGSLDLSEACRTSALEKDKAAKHCCV	ESQGSVSSAGSLDLSEACR(0.956)TSALEK(0.044)	7.14259e+07	0	0	0	0	0	0	0	0	0	0	0	0	0	0	0	0	0	0	0	0	0	0	0	0	0	0	3.794e+07	0	0	4.8685e+07	0	0	0	0	0
Q8CGM1	1508	0.997877	26.9113	123.62	R	RSQSSAKEKPSPPGGRPGLSQHRRHQSWSTF	EK(0.002)PSPPGGR(0.998)PGLSQHR	2.07773e+06	0	0	1.70805e+07	0	0	1.69267e+07	0	0	0	0	0	4.99686e+06	0	0	0	0	0	3.23114e+06	0	0	9.97531e+06	0	0	0	0	0	0	0	0	0	0	0	2.41629e+06	0	0
Q8CGM1	1267	0.992602	21.2763	76.21	R	EVNTCNPSTITGTLSRLSLDEDEEPKSCLVG	EVNTCNPSTITGTLSR(0.993)LSLDEDEEPK(0.007)	1.6485e+07	0	0	3.2892e+07	0	0	1.64497e+07	0	0	0	0	0	0	0	0	0	0	0	5.15504e+07	0	0	2.92655e+07	0	0	0	0	0	0	0	0	0	0	0	0	0	0
Q8CGV2	16	0.998204	29.3124	89.462	R	MQPAMMMFSSKYWARRGLSLDSAVPEDHQLL	R(0.998)GLSLDSAVPEDH(0.001)QLLGSLTQNK(0.001)	2.62951e+07	0	0	2.74433e+07	0	0	0	0	0	3.22993e+07	0	0	5.22917e+07	0	0	4.0311e+07	0	0	1.82495e+07	0	0	1.81442e+07	0	0	1.86141e+07	0	0	2.97921e+07	0	0	2.35341e+07	0	0	7.91836e+07	0	0
Q8CHG7	929	1	127.32	210.58	R	NMDPALMFRTRKKKWRSLGSLSQGSANATVL	WR(1)SLGSLSQGSANATVLDVAQTGGHK	1.11796e+08	0	0	8.20373e+07	0	0	4.86463e+07	0	0	6.37297e+07	0	0	2.05462e+07	0	0	6.56703e+07	0	0	1.2172e+08	0	0	8.43887e+07	0	0	5.38271e+07	0	0	6.95188e+07	0	0	9.3737e+07	0	0	5.40526e+07	0	0
Q8CHX7	398	1	72.4614	187.58	R	DSEGNLATKQVVFLQRPVTWNSAAQTPERKG	QVVFLQR(1)PVTWNSAAQTPER	4.51653e+07	0	0	7.77332e+07	0	0	6.70404e+07	0	0	8.50879e+07	0	0	8.75214e+07	0	0	8.32671e+07	0	0	7.95885e+07	0	0	6.26294e+07	0	0	7.6774e+07	0	0	2.46369e+07	0	0	8.16345e+07	0	0	4.50337e+07	0	0
Q8CI51	337	0.998861	29.9521	89.7	R	SPLSASEGPESPGSSRPSVAGLRSAAAFKPV	KANSTQEPSQQPASSGASPLSASEGPESPGSSR(0.999)PSVAGLR(0.001)	0	0	0	1.059e+07	0	0	7.38984e+06	0	0	0	0	0	0	0	0	0	0	0	0	0	0	0	0	0	0	0	0	0	0	0	1.53959e+07	0	0	1.11602e+07	0	0
Q8CI71	493	0.999999	62.0767	150.1	R	FSILQLHEFKFLEQSRSPSVSPSKQPSATSS	FLEQSR(1)SPSVSPSK	5.61802e+06	0	0	8.76626e+06	0	0	0	0	0	0	0	0	0	0	0	0	0	0	0	0	0	0	0	0	0	0	0	5.83406e+06	0	0	0	0	0	0	0	0
Q8CIE6	431	0.999999	60.3911	87.216	R	LTAVWVARNRFAVLDRMHSLLIKNLKNEITK	FAVLDR(1)MH(1)SLLIK	0	0	0	0	0	0	0	0	0	0	0	0	0	0	0	0	0	0	0	0	0	0	0	0	0	0	0	0	0	0	0	0	0	0	0	0
Q8CIP5	1134	0.401022	0	49.888	R	SPSFDTSTATSKLSHRPSILSEDLQIHDGSC	LSH(0.401)R(0.401)PSILSEDLQIH(0.196)DGSCCLQH(0.002)AQAPVSPR	0	0	0	0	0	0	0	0	0	0	0	0	0	0	0	0	0	0	0	0	0	0	0	0	0	0	0	0	0	0	0	0	0	0	0	0
Q8CJ69	8	0.997966	26.9066	69.276	R	________MLWFFSVRALAERPCRRSPGITC	MLWFFSVR(0.998)ALAER(0.002)	5.21654e+06	0	0	1.20216e+07	0	0	5.20701e+06	0	0	0	0	0	5.96346e+06	0	0	2.68683e+07	0	0	1.75375e+07	0	0	1.18683e+07	0	0	1.27252e+07	0	0	2.3904e+07	0	0	3.58273e+06	0	0	8.04141e+06	0	0
Q8JZP2	459	1	155.377	216.71	R	AQSPQPPRSRSPSQQRLSPQGQQPVSPQSGS	SPSQQR(1)LSPQGQQPVSPQSGSPQQQR	6.08386e+07	0	0	4.847e+07	0	0	3.85769e+06	0	0	7.15068e+07	0	0	7.85236e+07	0	0	1.35556e+08	0	0	6.77989e+07	0	0	9.1621e+07	0	0	6.67507e+07	0	0	5.7835e+07	0	0	7.4008e+07	0	0	7.17033e+07	0	0
Q8JZW4	564	0.500946	0	56.612	R	EIPDQLVSYMKAQGIRPRPPPAAPAQSPPQS	AQGIR(0.501)PR(0.501)PPPAAPAQSPPQSPAH(0.997)SPPGSPVH(0.001)THI	0	0	0	0	0	0	0	0	0	0	0	0	0	0	0	0	0	0	0	4.30282e+06	0	0	0	0	0	0	0	0	0	0	0	6.27031e+06	0	0	0	0
Q8JZW4	566	0.902731	9.68363	59.094	R	PDQLVSYMKAQGIRPRPPPAAPAQSPPQSPA	AQGIR(0.098)PR(0.903)PPPAAPAQSPPQSPAH(0.999)SPPGSPVHTHI	0	3.95354e+07	0	0	5.84026e+07	0	0	2.2274e+07	0	0	5.52803e+07	0	0	2.27273e+07	0	0	5.58302e+07	0	0	1.0904e+08	0	0	5.14198e+07	0	0	4.45272e+07	0	0	1.46049e+07	0	0	7.54976e+07	0	0	1.15216e+07	0
Q8JZX4	219	0.797602	7.33561	63.805	R	SSKAAIPPPVYEEPDRPRSPTGPSNSFLANM	AAIPPPVYEEPDR(0.798)PR(0.055)SPTGPSNSFLANMGGTVAHK(0.147)	1.52422e+07	0	0	1.7324e+07	0	0	0	0	0	0	0	0	0	0	0	0	0	0	1.46128e+07	0	0	0	0	0	1.75247e+07	0	0	0	0	0	0	0	0	0	0	0
Q8JZX4	221	0.495842	0	63.805	R	KAAIPPPVYEEPDRPRSPTGPSNSFLANMGG	AAIPPPVYEEPDR(0.496)PR(0.496)SPTGPSNSFLANMGGTVAHK(0.008)	0	0	0	0	0	0	0	0	0	0	0	0	0	0	0	0	0	0	0	0	0	0	0	0	0	0	0	0	0	0	0	0	0	0	0	0
Q8K012	499	0.99986	38.8002	107.47	R	DRRHSSDINHLVTQGRESPEGSYTDDANQEV	HSSDINHLVTQGR(1)ESPEGSYTDDANQEVR	4.0289e+07	0	0	5.53316e+07	0	0	5.21849e+07	0	0	0	0	0	1.9709e+07	0	0	2.62318e+07	0	0	3.66885e+07	0	0	0	0	0	0	0	0	3.04156e+07	0	0	5.55883e+07	0	0	2.56859e+07	0	0
Q8K2C9	109	1	98.4421	198.81	R	TKQEKRPLFLAPDFDRWLDESDAEMELRAKE	RPLFLAPDFDR(1)WLDESDAEMELR	292318736	0	0	2.81358e+08	0	0	3.95182e+08	0	0	6.21086e+08	0	0	2.95742e+08	0	0	7.03601e+07	0	0	5.13524e+08	0	0	1285183968	0	0	7.40668e+07	0	0	1055896039	0	0	5.06736e+08	0	0	5.26712e+08	0	0
Q8K2F8	215	0.999997	55.2218	180.24	R	QTASAHLPAPAPVGRRSPVPARPLPPTSQKA	R(1)SPVPARPLPPTSQK	1.65936e+07	0	0	5.78058e+07	0	0	2.77145e+07	0	0	5.30471e+07	0	0	6.03976e+07	0	0	6.43463e+07	0	0	2.08917e+07	0	0	0	0	0	2.35257e+07	0	0	0	0	0	3.87766e+07	0	0	3.8503e+07	0	0
Q8K2F8	190	1	66.5568	86.869	R	PQLAQGRSSPQLDPLRKSPTMEQAVQTASAH	SSPQLDPLR(1)K(1)SPTMEQAVQTASAHLPAPAPVGR	1.12163e+07	5.26754e+07	0	0	1.08973e+08	0	0	7.27753e+07	0	0	1.03211e+08	0	0	1.10393e+08	0	0	1.49026e+08	0	0	6.86612e+07	0	0	6.63021e+07	0	0	4.62712e+07	0	0	9.45605e+07	0	0	1.43838e+08	0	0	1.37426e+08	0
Q8K310	186	0.963364	14.1989	82.367	R	YRVPRDDWEEKRHFRRDSFDDRGPSLNPVLD	R(0.963)DSFDDR(0.037)GPSLNPVLDYDHGSR	0	0	0	0	0	0	0	0	0	0	0	0	0	0	0	0	0	0	0	0	0	0	0	0	0	0	0	0	0	0	0	0	0	238804502	0	0
Q8K310	192	0.999999	58.9355	154.13	R	DWEEKRHFRRDSFDDRGPSLNPVLDYDHGSR	RDSFDDR(1)GPSLNPVLDYDHGSR	2.82991e+08	0	0	4.27949e+08	0	0	3.40128e+08	0	0	2.41968e+08	0	0	3.49857e+08	0	0	2.53664e+08	0	0	3.20731e+08	0	0	4.37064e+08	0	0	428435786	0	0	284022399	0	0	3.66167e+08	0	0	5.7121e+08	0	0
Q8K3I9	246	0.827817	9.22783	106.74	R	LQRSKQSSRHSKEKDRQSPLHGNHITISHTQ	DR(0.828)QSPLH(0.073)GNH(0.099)ITISHTQAIGSR	0	0	0	5.75872e+06	0	0	7.71135e+06	0	0	0	0	0	7.07906e+06	0	0	0	0	0	0	0	0	0	0	0	0	0	0	0	0	0	0	0	0	0	0	0
Q8K3I9	21	1	113.703	115.69	R	SSSSQTPHSAPQRMRRSTAGSPPAAAGSGTG	R(1)STAGSPPAAAGSGTGPAGSCAPAAGAGR	0	0	0	0	0	0	0	0	0	0	0	0	0	0	0	0	0	0	0	0	0	0	0	0	0	0	0	0	0	0	0	0	0	0	0	0
Q8K3I9	160	1	65.2485	94.551	R	DRPKSQHIRTSSTIRRTSSLDTITGPYLTGQ	R(1)TSSLDTITGPYLTGQWPR	0	0	0	1.3794e+07	0	0	8.06387e+06	0	0	6.07237e+06	0	0	6.8124e+06	0	0	0	0	0	0	0	0	0	0	0	0	0	0	0	0	0	0	0	0	0	0	0
Q8K400	898	0.99999	49.9539	133.51	R	NVAEEKDEKEKLKKRRPVSVSPSSSQEISEN	R(1)PVSVSPSSSQEISENQYAVICSEK	2.89703e+07	0	0	3.13701e+07	0	0	2.25803e+07	0	0	2.54572e+07	0	0	3.11759e+07	0	0	2.5831e+07	0	0	3.63981e+07	0	0	2.48956e+07	0	0	4.33003e+07	0	0	2.4982e+07	0	0	0	0	0	3.1966e+07	0	0
Q8K400	897	0.499997	0	104.7	R	HNVAEEKDEKEKLKKRRPVSVSPSSSQEISE	R(0.5)R(0.5)PVSVSPSSSQEISENQYAVICSEK	5.50371e+07	0	0	8.75459e+07	0	0	175042576	0	0	1.52297e+07	0	0	1.25064e+07	0	0	2.05107e+08	0	0	0	0	0	0	0	0	3.89427e+08	0	0	0	0	0	2.6537e+08	0	0	9.54429e+06	0	0
Q8K4G5	403	0.999975	46.166	77.681	R	NPRQPTRTSSESIYSRPGSSIPGSPGHTIYA	TSSESIYSR(1)PGSSIPGSPGHTIYAK	6.12081e+07	0	0	1.53221e+07	0	0	1.79209e+07	0	0	1.29741e+07	0	0	5.08809e+07	0	0	3.73191e+07	0	0	1.02703e+07	0	0	1.36571e+07	0	0	1.65017e+07	0	0	2.88468e+07	0	0	7.92363e+07	0	0	3.2623e+07	0	0
Q8K4L6	326	0.709734	4.00448	92.773	R	VASREKVKGGVEHAGRAGYNEIPKSSKGSSS	VK(0.008)GGVEH(0.282)AGR(0.71)AGYNEIPK	0	0	0	0	0	0	0	0	0	0	0	0	0	0	0	1.60179e+07	0	0	0	0	0	0	0	0	0	0	0	0	0	0	0	0	0	0	0	0
Q8K4R9	5	0.999468	32.7384	74.165	R	___________MLVSRFASRFRKDSSTEMVR	LVSR(0.999)FASR(0.001)FR	0	0	0	0	0	0	0	0	0	0	0	0	0	0	0	0	0	0	0	0	0	0	0	0	8.13236e+06	0	0	0	0	0	0	0	0	0	0	0
Q8K596	619	0.999999	63.2997	113.11	R	KDNFFIELGQPQWLKRGISALLLNQGNGDKK	R(1)GISALLLNQGNGDKK	7.25953e+07	0	0	1.80725e+07	0	0	8.18535e+07	0	0	3.74336e+07	0	0	3.8997e+07	0	0	6.79358e+06	0	0	9.53099e+07	0	0	5.92509e+07	0	0	7.13951e+07	0	0	3.06237e+07	0	0	2.60633e+07	0	0	3.18019e+07	0	0
Q8R071	183	0.999491	32.9317	99.711	R	IRTMVNLPVMSPFRKRYSWVQLAGHTGSFKA	R(0.999)YSWVQLAGHTGSFK(0.001)	0	0	0	0	0	0	3.44302e+07	0	0	0	0	0	0	0	0	0	0	0	9.1032e+06	0	0	4.05164e+06	0	0	0	0	0	0	0	0	0	0	0	0	0	0
Q8R0J1	19	1	60.246	60.246	R	FGPPNEGPLQGLVASRIETYGGRHQTSAHST	MQAFGPPNEGPLQGLVASR(1)IETYGGR(1)	0	0	0	0	0	0	0	0	0	0	0	0	0	0	0	0	0	0	0	0	0	0	0	0	0	0	0	0	0	0	0	0	0	0	0	0
Q8R1F6	668	0.99998	47.011	108.66	R	SPSDGESSQTWREQRRLSNASASGQWSPTSD	R(1)LSNASASGQWSPTSDWILSWK	1.78475e+07	0	0	1.93119e+07	0	0	2.69566e+07	0	0	3.2416e+07	0	0	0	0	0	3.43201e+07	0	0	1.84084e+07	0	0	4.57024e+07	0	0	0	0	0	3.79393e+07	0	0	3.37687e+07	0	0	2.61472e+07	0	0
Q8R207	8	1	41.4322	41.432	R	________MAGMALARAWKQMSWFYYQYLLV	AGMALAR(1)AWK(1)QMSWFYYQYLLVTALYMLEPWER(1)	0	0	4.32783e+08	0	0	6.2597e+08	0	0	523734065	0	0	2.43487e+08	0	0	2.65485e+08	0	0	3.20008e+08	0	0	2.933e+08	0	0	6.13957e+08	0	0	5.24036e+08	0	0	9.93329e+07	0	0	2.39251e+08	0	0	2.52247e+08
Q8R554	770	0.998729	28.962	108.75	R	GARRAAPGTGGPTPGRSPPAPARQSVIHVQA	RAAPGTGGPTPGR(0.999)SPPAPAR(0.001)	1.33385e+07	0	0	4.73372e+06	0	0	3.93706e+06	0	0	8.02369e+06	0	0	7.67024e+06	0	0	7.09836e+06	0	0	3.84298e+06	0	0	7.55265e+06	0	0	5.57465e+06	0	0	5.10953e+06	0	0	0	0	0	5.36099e+06	0	0
Q8R574	225	0.74691	5.01345	81.329	R	IHGEAQDAESDLVDGRHSPPMVRSVAAIHPS	LGIAVIHGEAQDAESDLVDGR(0.747)H(0.235)SPPMVR(0.017)	3.57468e+07	0	0	4.2076e+07	0	0	3.15706e+07	0	0	4.53567e+07	0	0	5.73083e+07	0	0	5.09456e+07	0	0	5.4815e+07	0	0	2.34723e+07	0	0	6.92921e+07	0	0	6.13603e+07	0	0	1.14963e+07	0	0	0	0	0
Q8VBY2	78	0.985269	18.2533	108.5	R	PVRPSLSARKFSLQERPAGSCLGAQVGPYST	K(0.015)FSLQER(0.985)PAGSCLGAQVGPYSTGPASHISPR	6.85272e+07	0	0	0	0	0	4.35255e+07	0	0	5.70284e+07	0	0	0	0	0	0	0	0	1.34077e+08	0	0	1.20545e+08	0	0	1.05701e+08	0	0	0	0	0	0	0	0	0	0	0
Q8VBY2	457	0.5	0	106.54	R	PSWTTVILVKSMLRKRSFGNPFEPQARREER	K(0.5)R(0.5)SFGNPFEPQAR	4.81699e+07	0	0	0	0	0	0	0	0	0	0	0	0	0	0	0	0	0	0	0	0	0	0	0	0	0	0	0	0	0	0	0	0	0	0	0
Q8VCZ9	153	0.998531	27.5965	55.206	R	CVDLSRALVDAHGPARNSLMQLKVTALASTR	CVDLSR(0.155)ALVDAH(0.846)GPAR(0.999)NSLMQLK(1)	0	0	0	0	0	0	0	0	0	0	0	0	0	0	0	0	0	0	0	0	0	0	0	0	0	0	0	0	0	1.19303e+07	0	0	0	0	0	1.16864e+07
Q8VD37	154	0.618605	5.11069	102.72	R	LKASIGNIALSPSPVRKSPRRSPGAIKRNLS	ASIGNIALSPSPVR(0.619)K(0.191)SPR(0.191)	3.86275e+07	0	0	1.02228e+08	0	0	1.11843e+08	0	0	1.02061e+08	0	0	2.36224e+07	0	0	4.68514e+07	0	0	0	0	0	8.81916e+07	0	0	1.13449e+08	0	0	4.8462e+07	0	0	0	0	0	1.58777e+07	0	0
Q8VD37	481	0.996483	27.8367	101.43	R	RPKLPPGKPGVGDVSRPFSPPIHSSSPPPIA	LPPGK(0.002)PGVGDVSR(0.996)PFSPPIH(0.002)SSSPPPIAPLAR	3.27769e+08	4.88806e+08	0	4.63958e+08	7.93764e+08	0	3.20192e+08	3.19141e+08	0	2.75075e+08	6.7213e+07	0	2.62687e+08	3.70615e+08	0	2.84402e+08	6.98245e+08	0	9.00846e+07	7.97133e+08	0	3.58159e+08	5.70155e+08	0	3.30442e+08	7.98071e+08	0	2.65409e+08	4.88029e+08	0	1.05192e+08	7.15078e+08	0	3.08423e+08	4.42769e+08	0
Q8VD37	262	1	65.5699	65.57	R	TPPPLPPKTVPATPPRTGSPLTVATGNDQAA	TVPATPPR(1)TGSPLTVATGNDQAATEAK(1)	0	0	0	0	7.50116e+06	0	0	0	0	0	0	0	0	0	0	0	5.18e+06	0	0	0	0	0	0	0	0	0	0	0	5.39077e+06	0	0	0	0	0	0	0
Q8VDM6	194	0.999937	41.9945	109.4	R	NRGRGYFEHREDRRGRSPQPPAEEDEDDFDD	GR(1)SPQPPAEEDEDDFDDTLVAIDTYNCDLHFK	3.22544e+07	0	0	4.41954e+07	0	0	2.82794e+07	0	0	3.49566e+07	0	0	2.67705e+07	0	0	18009479	0	0	5.84716e+07	0	0	1.3935e+07	0	0	3.27463e+07	0	0	3.76815e+07	0	0	9.38189e+07	0	0	3.89557e+07	0	0
Q8VDM6	192	0.603666	1.82829	105.44	R	EENRGRGYFEHREDRRGRSPQPPAEEDEDDF	R(0.604)GR(0.396)SPQPPAEEDEDDFDDTLVAIDTYNCDLHFK	0	0	0	0	0	0	0	0	0	0	0	0	0	0	0	0	0	0	5.60087e+07	0	0	6.00715e+07	0	0	0	0	0	5.81652e+07	0	0	6.96831e+07	0	0	0	0	0
Q8VDZ4	560	0.969181	14.9759	99.641	R	QEREKLLRQSPPLAGREEEPGLGDSGIQSTP	LLR(0.031)QSPPLAGR(0.969)EEEPGLGDSGIQSTPGSGHAPR	0	0	0	0	0	0	0	0	0	0	0	0	0	0	0	0	0	0	0	0	0	0	0	0	0	0	0	9.6691e+06	0	0	0	0	0	1.79076e+07	0	0
Q8VEG4	3	1	45.3316	45.332	R	_____________MSRQNLVALTVTTLLGVA	SR(1)QNLVALTVTTLLGVAMGGFVLWK(1)GIQR(1)	0	0	0	0	0	0	0	0	8.98205e+06	0	0	0	0	0	0	0	0	0	0	0	1.32755e+07	0	0	9.23114e+06	0	0	0	0	0	0	0	0	0	0	0	0
Q8VEL9	291	0.992993	21.5334	120.6	R	RQIRLRRGRGHAGGQRPEPSSPDGPAPPTRR	GHAGGQR(0.993)PEPSSPDGPAPPTR(0.007)	0	0	0	0	0	0	0	0	0	0	0	0	0	0	0	0	0	0	0	0	0	0	0	0	0	0	0	0	0	0	0	0	0	0	0	0
Q8VEL9	305	0.967025	14.6756	104.9	R	QRPEPSSPDGPAPPTRRESLTKKAKRFLANL	GHAGGQRPEPSSPDGPAPPTR(0.967)R(0.033)	1.02682e+07	0	0	9.26188e+06	0	0	2.30692e+06	0	0	1.55516e+07	0	0	6.5761e+06	0	0	1.05287e+07	0	0	1.06243e+07	0	0	0	0	0	6.65079e+06	0	0	8.3993e+06	0	0	0	0	0	0	0	0
Q8VHG2	1081	0.999407	32.2881	65.836	R	QTEGPANPGASSGPRRLSTPNLMCNPDKPDA	R(0.999)LSTPNLMCNPDK(0.001)PDAPAFHSSTLER	7.9176e+06	0	0	0	0	0	0	0	0	1.00567e+07	0	0	3.20474e+07	0	0	2.04378e+07	0	0	1.96378e+07	0	0	0	0	0	1.08485e+07	0	0	1.88688e+07	0	0	4.00501e+07	0	0	2.3656e+07	0	0
Q8VHJ5	391	0.999711	35.3934	90.453	R	EGGESLSSGSLCQRSRPSSDLNNSTLQSPAH	SR(1)PSSDLNNSTLQSPAHLK	6.31284e+07	0	0	4.49284e+07	0	0	3.96352e+07	0	0	6.37443e+07	0	0	1.78241e+07	0	0	0	0	0	8.31401e+07	0	0	0	0	0	0	0	0	0	0	0	5.92317e+07	0	0	5.51886e+07	0	0
Q91W39	7	0.969321	15.3545	91.636	R	_________MNTAPSRPSPTRRDPYSFGDSR	MNTAPSR(0.969)PSPTR(0.002)R(0.028)	0	0	0	0	0	0	0	0	0	0	0	0	0	0	0	0	0	0	5.45625e+06	0	0	0	0	0	5.46162e+06	0	0	0	0	0	0	0	0	0	0	0
Q91WK5	10	0.971042	15.255	94.538	R	______MSLQVSRSLRVVAYSLRTALTFCSP	MSLQVSRSLR(0.971)VVAYSLR(0.029)	0	0	0	0	0	0	0	0	0	0	0	0	0	0	0	2.3025e+07	0	0	0	0	0	0	0	0	0	0	0	1.5685e+08	0	0	0	0	0	0	0	0
Q91ZU6	7331	1	140.243	148.17	R	GSRAGSKAGSRASSRRGSDASDFDISEIQSV	R(1)GSDASDFDISEIQSVCSDVETVPQTHRPVPR	8.66632e+07	0	0	1.3377e+07	0	0	5.54037e+07	0	0	0	0	0	1.0504e+08	0	0	1.23964e+08	0	0	1.05573e+08	0	0	5.42641e+07	0	0	0	0	0	5.90813e+07	0	0	1.47569e+08	0	0	1.03329e+08	0	0
Q921K9	7	0.999972	47.2759	86.898	R	_________MSGRSVRAETRSRAKDDIKKVM	MSGRSVR(1)AETR	0	0	0	0	0	0	0	0	0	0	0	0	0	0	0	0	0	0	0	0	0	0	0	0	0	0	0	0	0	0	0	0	0	0	0	0
Q924H7	522	1	102.194	120.93	R	HDPVSPRSLQRLSSQRSPSPGPNHTCSSNAS	LSSQR(1)SPSPGPNH(1)TCSSNASTATVVPQNASAR	0	2.04673e+07	0	0	0	0	0	2.67471e+07	0	0	1.65914e+07	0	0	0	0	0	2.84782e+07	0	0	1.59256e+07	0	0	2.34231e+07	0	0	0	0	0	1.53981e+07	0	0	2.03695e+07	0	0	1.152e+07	0
Q925D8	278	0.997557	24.1205	43.684	R	VNQSKVQVVVLFASARAVYSLFSYSIHHGLS	VQVVVLFASAR(0.998)AVYSLFSYSIH(0.369)H(0.78)GLSPK(0.853)	0	0	5.13052e+06	0	0	3.03532e+07	0	0	1.96052e+07	0	0	0	0	0	0	0	0	1.20146e+07	0	0	0	0	0	0	0	0	5.89258e+06	0	0	0	0	0	7.25051e+06	0	0	5.42816e+06
Q99J21	555	1	130.379	205.12	R	YIEQCQDSPTSGKFRRGSGSACSLFCCCGRD	R(1)GSGSACSLFCCCGR	1.73534e+08	0	0	0	0	0	7.56006e+07	0	0	0	0	0	1.19246e+08	0	0	1.1525e+08	0	0	117368629	0	0	6.90694e+07	0	0	8.04942e+07	0	0	1.21867e+08	0	0	7.94821e+07	0	0	1.09032e+08	0	0
Q99JG2	469	0.99798	27.6018	206.49	R	KLKAEVSSSIYFHKPRESPPLLPLGTPC___	AEVSSSIYFHK(0.002)PR(0.998)ESPPLLPLGTPC	7.88854e+07	0	0	7.85128e+07	0	0	6.50684e+07	0	0	6.34094e+07	0	0	6.64488e+07	0	0	7.89911e+07	0	0	1.56431e+08	0	0	1.48518e+08	0	0	9.77269e+07	0	0	7.59325e+07	0	0	1.17696e+08	0	0	8.01742e+07	0	0
Q99JP6	228	1	67.9808	67.981	R	WRQQLEVQRAEAELLRQRVAELEAQVAVEPV	AEAELLR(1)QR(1)	0	0	0	0	0	0	0	0	0	0	0	0	0	0	0	0	0	0	0	0	0	0	1.69445e+07	0	0	0	0	0	0	0	0	0	0	0	0	0
Q99K24	112	0.999949	42.9063	57.543	R	LTVFVEQLVLTFRRERPPFIDLETFNAGSDA	ER(1)PPFIDLETFNAGSDAGSDSEYESPFVGVGNR	0	0	0	1.65833e+07	0	0	0	0	0	0	0	0	0	0	0	0	0	0	3.29622e+07	0	0	3.04992e+07	0	0	0	0	0	0	0	0	0	0	0	0	0	0
Q99L43	37	1	89.6197	97.304	R	SEAKLDGETASDSESRAETAPLPTSVDDTPE	LDGETASDSESR(1)AETAPLPTSVDDTPEVLNR	1.44319e+07	0	0	9.7715e+06	0	0	1.48392e+07	0	0	2.16073e+07	0	0	3.06276e+07	0	0	2.39464e+07	0	0	1.61259e+07	0	0	0	0	0	0	0	0	2.82815e+07	0	0	1.61571e+07	0	0	3.61712e+07	0	0
Q99LB6	277	0.803729	6.20565	74.65	R	ACAIADAFNLPSSHLRPITDSPVIGAQRPKN	YEMACAIADAFNLPSSH(0.193)LR(0.804)PITDSPVIGAQRPK(0.004)	5.68833e+07	0	0	0	0	0	0	0	0	0	0	0	6.42367e+07	0	0	0	0	0	0	0	0	6.90921e+07	0	0	0	0	0	9.59525e+07	0	0	5.04419e+07	0	0	4.14313e+07	0	0
Q99LD4	451	0.807296	6.422	67.413	R	RAAVLRNQIHVKSPPREGSQGELTPANSQSR	NQIH(0.009)VK(0.184)SPPR(0.807)EGSQGELTPANSQSR	6.7056e+06	0	0	0	0	0	0	0	0	0	0	0	0	0	0	0	0	0	0	0	0	0	0	0	0	0	0	0	0	0	0	0	0	0	0	0
Q99LM9	303	1	59.5022	59.502	R	REVIPTHTVYALNIERIIMKLWHPNHEELQQ	EVIPTH(1)TVYALNIER(1)IIMK(1)	0	0	0	0	0	0	0	0	0	0	0	0	0	0	1.30482e+07	0	0	0	0	0	0	0	0	0	0	0	0	0	0	0	0	0	0	0	0	0
Q99MU3	338	0.541956	0.772965	83.998	R	HSAPAPTPTAVPEATRSPSFPACHPPPAGAS	STHSAPAPTPTAVPEATR(0.542)SPSFPACH(0.454)PPPAGASSSVAASK(0.004)	0	0	0	0	0	0	4.72906e+06	0	0	5.64471e+06	0	0	0	0	0	8.40775e+06	0	0	1.24886e+07	0	0	0	0	0	0	0	0	0	0	0	0	0	0	0	0	0
Q99MX7	526	1	59.6745	182.28	R	EGCWDRGSWVSPSRARSSYGAPPSAPPPPPP	AR(1)SSYGAPPSAPPPPPPPPPQGGSQR(1)	0	0	0	2.28847e+07	1.09308e+07	0	3.52671e+07	2.67591e+07	0	6.46492e+06	0	0	1.1072e+07	0	0	0	0	0	1.96197e+07	9.09186e+06	0	2.48458e+07	0	0	3.01208e+07	0	0	4.43586e+06	0	0	0	0	0	0	0	0
Q99N57	231	0.46343	0	49.453	R	RMRESVSRMPASSQHRYSTPHAFTFNTSSPS	MPASSQH(0.463)R(0.463)YSTPH(0.073)AFTFNTSSPSSEGSLSQR	0	0	0	0	0	0	0	0	0	0	0	0	0	0	0	0	0	0	0	0	0	0	0	0	0	0	0	0	0	0	0	0	0	0	0	0
Q99NE5	902	0.998975	30.4543	154.13	R	STNCLRPDTSLHSPERERGRWSPSLARRRPA	SASTNCLRPDTSLHSPER(0.999)ER(0.001)	5.83897e+06	0	0	0	0	0	6.5295e+06	0	0	8.97827e+06	0	0	4.01084e+06	0	0	3.734e+06	0	0	0	0	0	0	0	0	7.96353e+06	0	0	0	0	0	0	0	0	0	0	0
Q99NE5	240	1	95.0163	113.62	R	SEVPREKKARLQERSRSQTPLSTAAVSSQDT	SR(1)SQTPLSTAAVSSQDTASHGAPLDR	0	0	0	6.97014e+07	0	0	2.55592e+07	0	0	0	0	0	0	0	0	0	0	0	0	0	0	0	0	0	2.19381e+07	0	0	0	0	0	2.21748e+07	0	0	1.65262e+07	0	0
Q99P72	162	1	65.7147	115.58	R	LAEPAAPPSTPAAPKRRGSGSVDETLFALPA	R(1)R(1)GSGSVDETLFALPAASEPVIPSSAEK	2.69753e+08	1.01153e+08	0	2.94818e+08	1.22605e+08	0	2.50576e+08	9.42399e+07	0	3.60668e+08	1.29278e+08	0	5.06491e+08	1.16146e+08	0	4.22716e+08	1.47967e+08	0	3.267e+08	2.64512e+08	0	3.206e+08	1.50753e+08	0	2.75806e+08	0	0	4.14227e+08	1.41589e+08	0	4.77295e+08	1.69279e+08	0	5.99929e+08	152818475	0
Q99P72	163	1	69.4283	115.58	R	AEPAAPPSTPAAPKRRGSGSVDETLFALPAA	R(1)R(1)GSGSVDETLFALPAASEPVIPSSAEK	5.75967e+07	1.01153e+08	0	7.5392e+07	1.22605e+08	0	5.13882e+07	9.42399e+07	0	7.20417e+07	1.29278e+08	0	5.57988e+06	1.16146e+08	0	1.04417e+08	1.47967e+08	0	6.85081e+07	2.64512e+08	0	6.72415e+07	1.50753e+08	0	0	0	0	1.21512e+08	1.41589e+08	0	0	1.69279e+08	0	1.4436e+08	152818475	0
Q9CPR5	6	1	81.7488	99.844	R	__________MAGTARGCGTSLDLLRSLPRV	MAGTAR(1)GCGTSLDLLRSLPR	0	0	0	0	0	0	0	0	0	0	0	0	0	0	0	0	0	0	0	0	0	0	0	0	0	0	0	0	0	0	0	0	0	0	0	0
Q9CPS8	37	1	65.0906	90.674	R	HESEEAFIPDDSSQYRTPSPGEQQQVQEVKK	LHESEEAFIPDDSSQYR(1)TPSPGEQQQVQEVK(1)	0	0	0	0	0	0	0	0	0	0	7.89713e+06	0	0	5.53687e+06	0	0	0	0	0	0	0	0	0	0	0	0	0	0	0	0	0	7.77766e+06	0	0	6.41695e+06	0
Q9CQS4	89	0.923677	10.8287	52.276	R	EGSAEEPFPGGGEGPRPGPSSEQLNRFAGFG	SPSYGVPSAPPTLEGSAEEPFPGGGEGPR(0.924)PGPSSEQLNR(0.076)	0	0	0	0	0	0	4.61094e+06	0	0	6.04069e+06	0	0	7.05932e+06	0	0	7.43333e+06	0	0	0	0	0	0	0	0	8.18449e+06	0	0	0	0	0	0	0	0	0	0	0
Q9CQS8	16	0.984778	18.1087	129.05	R	MPGPTPSGTNVGSSGRSPSKAVAARAAGSTV	PGPTPSGTNVGSSGR(0.985)SPSK(0.015)	2.41977e+06	0	0	1.16225e+08	0	0	3.58887e+06	0	0	0	0	0	9.49549e+07	0	0	0	0	0	0	0	0	0	0	0	2.24914e+06	0	0	2.59273e+06	0	0	5.97166e+06	0	0	3.72346e+06	0	0
Q9CW73	125	0.993673	21.9265	42.347	R	LHVPNLHWLVVEDAPRRTPLTARLLRDTGLN	MANTLLH(1)VPNLH(0.999)WLVVEDAPR(0.994)R(0.994)TPLTAR(0.014)	0	0	1.4836e+07	0	0	1.77901e+07	0	0	2.42028e+07	0	0	2.33897e+07	0	0	1.04224e+07	0	0	1.7219e+07	0	0	1.2003e+07	0	0	1.33957e+07	0	0	0	0	0	1.02273e+07	0	0	0	0	0	1.48848e+07
Q9CW73	126	0.993673	21.9265	42.347	R	HVPNLHWLVVEDAPRRTPLTARLLRDTGLNY	MANTLLH(1)VPNLH(0.999)WLVVEDAPR(0.994)R(0.994)TPLTAR(0.014)	0	0	1.4836e+07	0	0	1.77901e+07	0	0	2.42028e+07	0	0	2.33897e+07	0	0	1.04224e+07	0	0	1.7219e+07	0	0	1.2003e+07	0	0	1.33957e+07	0	0	0	0	0	1.02273e+07	0	0	0	0	0	1.48848e+07
Q9CWZ7	207	1	57.8017	57.802	R	TCYKKTIAQVLVHLHRNDYVAAERCVRESYS	TIAQVLVH(1)LH(1)R(1)NDYVAAER(1)	0	0	0	0	0	0	0	0	0	0	0	4.27749e+06	0	0	0	0	0	0	0	0	0	0	0	0	0	0	0	0	0	6.31748e+06	0	0	0	0	0	0
Q9CXG3	177	0.663319	2.98223	57.563	R	LDDPFDDPPDLLIPDRSPEPTKEQLDSGRIG	INHTVILDDPFDDPPDLLIPDR(0.663)SPEPTK(0.334)EQLDSGR(0.003)	2.22768e+07	0	0	3.32716e+07	0	0	0	0	0	1.73487e+07	0	0	1.21295e+07	0	0	2.11993e+07	0	0	0	0	0	0	0	0	2.92357e+07	0	0	3.18985e+07	0	0	0	0	0	0	0	0
Q9CXY1	235	0.682429	3.323	82.56	R	ISKATTWCKDKLMGQRESPAHDMEPFSIDLH	LMGQR(0.682)ESPAH(0.318)DMEPFSIDLHAPLSK	0	0	0	0	0	0	5.47046e+06	0	0	5.29046e+06	0	0	9.58035e+06	0	0	6.3314e+06	0	0	0	0	0	0	0	0	0	0	0	0	0	0	0	0	0	7.93074e+06	0	0
Q9CY16	6	0.997644	26.2679	67.019	R	__________MAALCRSHAGTAGSRFLRALV	MAALCR(0.998)SH(0.002)AGTAGSR	9.37629e+06	0	0	10246108	0	0	470842	0	0	4.81136e+07	0	0	1.44754e+07	0	0	1.0021e+07	0	0	9.31596e+06	0	0	0	0	0	9.51678e+06	0	0	1.91699e+07	0	0	9.68278e+06	0	0	1.60967e+07	0	0
Q9CYT6	299	0.994041	24.6002	120.79	R	KKTYKNPSLRAQGQIRSPTKTHTPSPTSPKS	AQGQIR(0.994)SPTK(0.002)TH(0.003)TPSPTSPK	1.43509e+07	0	0	8.60754e+06	0	0	1.53228e+07	0	0	2.39589e+07	0	0	1.68425e+07	0	0	1.47078e+07	0	0	1.68833e+07	0	0	1.75285e+07	0	0	1.41653e+07	0	0	3.54692e+07	0	0	9.74758e+06	0	0	1.57369e+07	0	0
Q9CZ44	174	0.434997	0	83.226	R	AAPEEESAYVAGERRRHSGQDVHVVLKLWKT	R(0.435)H(0.435)SGQDVH(0.113)VVLK(0.017)	0	0	0	0	0	0	0	0	0	0	0	0	0	0	0	0	0	0	0	0	0	0	0	0	0	0	0	0	0	0	0	0	0	0	0	0
Q9CZR3	15	0.997185	22.9214	61.11	R	_MGNTLGLAPMGTLPRRSHRREEPLPNPGSF	MGNTLGLAPMGTLPR(0.997)R(0.996)SH(0.449)R(0.558)	0	0	0	0	0	0	0	0	0	0	0	0	0	0	3.97273e+06	0	0	0	0	0	0	0	0	0	0	0	0	0	0	0	0	0	0	0	0	0
Q9CZR3	16	0.996259	21.6858	61.11	R	MGNTLGLAPMGTLPRRSHRREEPLPNPGSFD	MGNTLGLAPMGTLPR(0.997)R(0.996)SH(0.449)R(0.558)	0	0	0	0	0	0	0	0	0	0	0	0	0	0	3.97273e+06	0	0	0	0	0	0	0	0	0	0	0	0	0	0	0	0	0	0	0	0	0
Q9D0E1	448	0.986767	18.7259	72.731	R	IERMGLVMDRMGSVERMGSSIERMGPLGLDH	MGLVMDRMGSVER(0.987)MGSSIER(0.013)	0	0	0	0	0	0	0	0	0	0	0	0	0	0	0	0	0	0	0	0	0	0	0	0	0	0	0	0	0	0	0	0	0	0	0	0
Q9D1F4	76	0.999997	54.8659	85.76	R	CLHDIAQAHRAATATRPPGPPPAPQPPSPAP	AATATR(1)PPGPPPAPQPPSPAPSPPPR(0.966)PALAR(0.034)	0	3.64035e+07	0	0	6.43087e+07	0	0	4.54826e+07	0	0	5.46235e+07	0	0	3.93756e+07	0	0	4.88211e+07	0	0	5.45506e+07	0	0	2.76691e+07	0	0	5.85124e+06	0	0	6.71177e+06	0	0	3.14912e+07	0	0	2.2968e+07	0
Q9D1F4	96	0.998405	27.9276	85.76	R	PPAPQPPSPAPSPPPRPALAREDEEEDEDEP	AATATR(0.01)PPGPPPAPQPPSPAPSPPPR(0.998)PALAR(0.991)	0	3.64035e+07	0	1.17174e+07	6.43087e+07	0	0	4.54826e+07	0	0	5.46235e+07	0	9.70683e+06	3.93756e+07	0	0	4.88211e+07	0	0	5.45506e+07	0	0	2.76691e+07	0	0	5.85124e+06	0	0	6.71177e+06	0	0	3.14912e+07	0	0	2.2968e+07	0
Q9D1T0	594	0.848472	7.48228	102.15	R	GKGNTKHNIEIEYVPRKSDAGISSADAPRKF	HNIEIEYVPR(0.848)K(0.151)SDAGISSADAPR	7.76675e+07	0	0	0	0	0	0	0	0	3.29011e+07	0	0	4.43825e+07	0	0	0	0	0	9.65808e+07	0	0	9.90967e+07	0	0	8.13354e+07	0	0	0	0	0	6.54193e+07	0	0	0	0	0
Q9D394	32	1	69.0335	139.31	R	KITQAAMETIYLCKFRVSMDGEWLCLRELDD	FR(1)VSMDGEWLCLR	6.16378e+07	0	0	6.49117e+07	0	0	5.3574e+07	0	0	7.56065e+07	0	0	5.48873e+07	0	0	23771473	0	0	1.7036e+08	0	0	1.16442e+08	0	0	1.94216e+08	0	0	1.09971e+08	0	0	1.47241e+08	0	0	1.22374e+08	0	0
Q9D5V6	45	0.998682	28.8169	61.438	R	DKLSAGAAPSEESPERPVEPTEEQQQQPPTE	LSAGAAPSEESPER(0.999)PVEPTEEQQQQPPTEDPQFLHQAK(0.001)	1.66164e+07	0	0	9.12416e+06	0	0	0	0	0	0	0	0	0	0	0	1.66944e+07	0	0	0	0	0	0	0	0	0	0	0	1.33074e+07	0	0	0	0	0	2.458e+07	0	0
Q9D898	62	0.995941	23.932	94.402	R	LLRQGDMLRAFHAALRNSPINTKNQAVKERA	AFHAALR(0.996)NSPINTK(0.004)	0	0	0	0	0	0	0	0	0	0	0	0	0	0	0	0	0	0	0	0	0	0	0	0	8.63589e+08	0	0	0	0	0	0	0	0	0	0	0
Q9D8N0	45	0.968251	15.4801	74.147	R	RVLSAPPHFHFGQTNRTPEFLRKFPAGKVPA	VLSAPPH(0.003)FH(0.027)FGQTNR(0.968)TPEFLR(0.001)	5.76064e+07	0	0	6.81025e+07	0	0	7.38969e+07	0	0	3.91706e+07	0	0	2.65387e+07	0	0	3.1635e+07	0	0	1.21624e+08	0	0	1.02011e+08	0	0	8.40486e+07	0	0	4.81935e+07	0	0	7.081e+07	0	0	2.29224e+07	0	0
Q9D9Q0	4	0.999997	54.756	77.318	R	____________MAERLLVTALKGGKNTKIL	MAER(1)LLVTALK	0	0	0	0	0	0	0	0	0	0	0	0	0	0	0	0	0	0	0	0	0	0	0	0	0	0	0	0	0	0	0	0	0	0	0	0
Q9DB25	307	1	50.9665	62.813	R	PFWSWLQMGKDLLFIRLRYLTGAWRLKQTRK	LVPFWSWLQMGK(1)DLLFIR(1)LR(1)	0	0	0	0	0	0	0	0	0	0	0	0	0	0	2.82498e+07	0	0	3.8849e+07	0	0	0	0	0	0	0	0	0	0	0	1.81607e+08	0	0	0	0	0	2.39694e+07
Q9DBN1	346	0.873921	9.26016	48.947	R	ALTCVTYLFHILACYRKHMKRLWAGDKHFLP	GVWVVTILPAALTCVTYLFH(0.103)ILACYR(0.874)K(0.673)H(0.693)MK(0.656)	0	0	0	0	0	0	0	0	0	0	0	1.30557e+07	0	0	0	0	0	6.11185e+06	0	0	0	0	0	0	0	0	0	0	0	0	0	0	0	0	0	0
Q9DBS2	29	0.997428	25.8863	65.275	R	SPTAVLAAGEDAGAGRPGAGTPLRQTLWPLN	DTVDSAGTSPTAVLAAGEDAGAGR(0.997)PGAGTPLR(0.003)	0	0	0	8.08858e+06	0	0	0	0	0	0	0	0	1.68148e+07	0	0	1.76747e+07	0	0	1.33952e+07	0	0	0	0	0	0	0	0	7.42991e+06	0	0	0	0	0	1.67313e+07	0	0
Q9DBS9	481	1	119.054	126.29	R	LGPVLESSGEARSKRRTSLPAPGPNTSSVSL	R(1)TSLPAPGPNTSSVSLWSILR	0	0	0	1.91796e+07	0	0	1.1785e+07	0	0	6.93277e+06	0	0	0	0	0	0	0	0	4.28665e+07	0	0	1.02124e+07	0	0	1.81266e+07	0	0	0	0	0	16838553	0	0	1.37503e+07	0	0
Q9DC28	358	0.496991	1.10821	62.295	R	PTPLTPTSHTANTSPRPVSGMERERKVSMRL	LRGTQEVAPPTPLTPTSH(0.385)TANTSPR(0.497)PVSGMER(0.118)	0	0	0	0	0	0	0	0	0	0	0	0	0	0	0	0	0	0	0	0	0	0	0	0	0	0	0	0	0	0	0	0	0	0	0	0
Q9ER64	809	0.333333	0	74.505	R	PGGESPCPRCRREVHRLKMLQEAVLSIQEAQ	EVH(0.333)R(0.333)LK(0.333)MLQEAVLSIQEAQQELH(0.955)R(0.045)	0	0	0	0	0	0	0	0	0	0	0	0	0	0	0	0	0	0	0	0	0	0	0	0	0	0	0	0	0	0	0	0	0	0	0	0
Q9ERG0	223	0.999415	32.5933	109.71	R	QTKSLWTQSRNAGGRRLSENNCSLDDWEIGA	R(0.999)LSENNCSLDDWEIGAGHLSSSAFNSEK(0.001)	9.95063e+06	0	0	2.00939e+07	0	0	0	0	0	0	0	0	0	0	0	0	0	0	1.32018e+07	0	0	0	0	0	2.41133e+07	0	0	0	0	0	2.34871e+07	0	0	0	0	0
Q9ESN9	1200	0.976992	18.8143	140.46	R	GLRANKTSPTSGEGTRPGGIIHVYGDDSSDK	ANK(0.013)TSPTSGEGTR(0.977)PGGIIHVYGDDSSDK(0.01)	4.2268e+07	0	0	4.61133e+07	0	0	4.97404e+07	0	0	0	0	0	4.53437e+07	0	0	5.08866e+07	0	0	0	0	0	5.38578e+07	0	0	0	0	0	6.66035e+07	0	0	1.03628e+08	0	0	0	0	0
Q9ET77	575	0.999999	64.4682	75.02	R	GSGHKQPGNPKPRERRTESPTTFSWTSHHRA	R(1)TESPTTFSWTSHHR	5.27854e+06	0	0	8.92732e+06	0	0	5.37149e+06	0	0	0	0	0	0	0	0	0	0	0	0	0	0	0	0	0	0	0	0	0	0	0	0	0	0	0	0	0
Q9JHU4	1225	0.889529	9.05912	107.74	R	DNIEGEWGAFNDIMRRKDSAIQQQVANLQMK	R(0.89)K(0.11)DSAIQQQVANLQMK	5.43541e+06	0	0	1.06818e+07	0	0	1.25862e+07	0	0	1.04585e+07	0	0	1.95785e+07	0	0	0	0	0	1.11672e+07	0	0	1.3111e+07	0	0	1.06151e+07	0	0	1.76444e+07	0	0	2.31654e+07	0	0	1.66981e+07	0	0
Q9JI11	463	0.992126	21.0039	61.649	R	LLALDPMMEQEMEEIRQKYRSKRQPILDAIE	LLALDPMMEQEMEEIR(0.992)QK(0.008)	0	0	0	0	0	0	3.24597e+07	0	0	0	0	0	8.1883e+06	0	0	5.79297e+06	0	0	0	0	0	0	0	0	0	0	0	0	0	0	1.1185e+07	0	0	0	0	0
Q9JJ69	89	0.498187	0	60.951	R	PDSVEDEFELSTVCHRPEGLEQLQEQTKFTR	PLDPDSVEDEFELSTVCH(0.498)R(0.498)PEGLEQLQEQTK(0.004)	0	0	0	0	0	0	0	0	0	0	0	0	0	0	0	0	0	0	0	0	0	0	0	0	0	0	0	0	0	0	0	0	0	0	0	0
Q9JJ69	70	0.998302	30.9184	57.838	R	SETLAAPASLRPHRPRPLDPDSVEDEFELST	PR(0.998)PLDPDSVEDEFELSTVCH(0.001)R(0.001)PEGLEQLQEQTK	1.74475e+07	0	0	1.25507e+07	0	0	0	0	0	0	0	0	0	0	0	4.49907e+06	0	0	0	0	0	2.84778e+07	0	0	1.95122e+07	0	0	0	0	0	1.18746e+07	0	0	0	0	0
Q9JJH7	529	0.996993	27.7275	49.176	R	EDPWRDLFLWAVLQNRYEMATYFWAMGREGV	SEDPWR(0.001)DLFLWAVLQNR(0.997)YEMATYFWAMGR(0.002)	2.91198e+07	0	0	1.84708e+07	0	0	1.05352e+07	0	0	8.09212e+06	0	0	0	0	0	0	0	0	7.51631e+07	0	0	3.35053e+07	0	0	7.49554e+07	0	0	0	0	0	2.25874e+07	0	0	0	0	0
Q9JM52	572	0.998247	28.1045	76.544	R	SPSPPGPLSQTPPMQRPVEPQEGPHKSLVAH	AKPSSAGPEPPISQASPSPPGPLSQTPPMQR(0.998)PVEPQEGPHK(0.002)	1.43751e+07	0	0	2.12757e+07	0	0	9.11918e+06	0	0	0	0	0	1.78347e+07	0	0	0	0	0	2.12406e+07	0	0	0	0	0	0	0	0	0	0	0	0	0	0	5.24328e+06	0	0
Q9QUG9	551	1	75.8592	104.82	R	CHKQCKERLSVECRRRAQSVSLEGSAPSPSP	R(1)AQSVSLEGSAPSPSPTHTHHR	0	0	0	0	0	0	0	0	0	0	0	0	0	0	0	0	0	0	0	0	0	0	0	0	0	0	0	0	0	0	0	0	0	0	0	0
Q9QVP9	373	1	84.5296	152.96	R	HKGSLIMHAKKDGEKRNSLPQIPTLNLEARR	R(1)NSLPQIPTLNLEAR	7.87055e+07	0	0	8.69157e+07	0	0	7.9558e+07	0	0	2.97304e+07	0	0	51046519	0	0	3.35427e+07	0	0	1.46389e+08	0	0	1.76355e+08	0	0	1.30006e+08	0	0	2.68817e+07	0	0	4.8116e+07	0	0	2.97612e+07	0	0
Q9QWI6	1131	0.999857	38.461	93.712	R	QKPQVKLRRAVSEVVRPASTPPIMASAIKDE	AVSEVVR(1)PASTPPIMASAIKDEDDEER	9.57558e+06	0	0	9.72715e+06	0	0	1.37004e+07	0	0	8.67691e+06	0	0	8.27561e+06	0	0	6.85413e+06	0	0	8.66067e+06	0	0	1.64742e+07	0	0	0	0	0	0	0	0	0	0	0	9.05132e+06	0	0
Q9QWI6	567	0.998825	29.3022	162.11	R	GGPPPPHSPYSGPPSRGSPVRQSFRKDSGSS	LADVSAPSGGPPPPHSPYSGPPSR(0.999)GSPVR(0.001)	3.12089e+07	1.38188e+07	0	2.02619e+07	1.06258e+07	0	2.18023e+07	0	0	1.81841e+07	0	0	2.6582e+07	0	0	2.5886e+07	8.79199e+06	0	1.89479e+07	0	0	3.99267e+07	1.34211e+07	0	2.90491e+07	1.57298e+07	0	0	0	0	2.07575e+07	0	0	1.56649e+07	1.81065e+07	0
Q9QWI6	404	0.999997	55.7103	99.407	R	PSGSPSRSRLSYAGGRPPSYAGSPVHHAAER	LSYAGGR(1)PPSYAGSPVHHAAER	3.33014e+08	0	0	1.75652e+07	0	0	2.40194e+07	0	0	3.60238e+08	0	0	1.78266e+08	0	0	2.97203e+08	0	0	3.95974e+08	0	0	1.19883e+07	0	0	8.73008e+06	0	0	2.34963e+08	0	0	3.48032e+08	0	0	1.80067e+08	0	0
Q9QWI6	77	0.999877	40.108	150.04	R	YRTLGGGGGGGSGGRRFSNVGLVHTSERRHT	R(1)FSNVGLVHTSER	0	0	0	0	0	0	0	0	0	0	0	0	0	0	0	0	0	0	1.59075e+08	0	0	2.37366e+08	0	0	0	0	0	3.31051e+06	0	0	0	0	0	7.47291e+07	0	0
Q9QXL2	692	0.986327	18.571	74.786	R	KKQYEEKLMMLQHKIRDTQLERDQVLQNLGS	LMMLQH(0.016)K(0.998)IR(0.986)DTQLER	0	3.05203e+07	0	0	6.64476e+07	0	0	8.1369e+07	0	0	1.74629e+08	0	0	109536353	0	0	9.24747e+07	0	0	2.5384e+08	0	0	1.46356e+08	0	0	1.32435e+08	0	0	2.12841e+08	0	0	142333401	0	0	7.93384e+07	0
Q9QXS1	2191	1	93.9953	140.24	R	ESARQLQLAQEAAQKRLQAEEKAHAFVVQQR	QLQLAQEAAQK(1)R(1)LQAEEK	0	0	0	0	0	0	0	0	0	0	0	0	0	0	0	0	0	0	0	1.27121e+07	0	0	0	0	0	0	0	0	0	0	0	0	0	0	0	0
Q9QXS6	347	0.999996	55.1193	93.712	R	DSGPSSSSSSSSSPPRTPFPYITCHRTPNLS	ASDSGPSSSSSSSSSPPR(1)TPFPYITCHR	8.13696e+07	0	0	7.16566e+07	0	0	8.24497e+07	0	0	4.38267e+07	0	0	5.05863e+07	0	0	3.53474e+07	0	0	9.37043e+07	0	0	1.14371e+08	0	0	7.9813e+07	0	0	5.72221e+07	0	0	8.79874e+07	0	0	0	0	0
Q9QYB8	529	0.999271	31.3705	87.532	R	GPQSQLLASVIAEKSRSPSTESQLMSKGDAD	SAGPQSQLLASVIAEK(1)SR(0.999)SPSTESQLMSK(0.001)	0	0	0	0	4.08856e+07	0	0	2.52663e+07	0	0	4.04336e+07	0	0	3.92402e+07	0	0	4.06278e+07	0	0	6.74698e+07	0	0	3.88136e+07	0	0	0	0	0	5.12466e+07	0	0	4.83491e+07	0	0	6.89637e+07	0
Q9QYB8	64	0.999999	60.4511	202.25	R	EQKKRVTMILQSPSFREELEGLIQEQMKKGN	VTMILQSPSFR(1)EELEGLIQEQMK	4.49896e+07	0	0	7.52442e+07	0	0	5.89519e+07	0	0	9.62479e+07	0	0	7.10126e+07	0	0	1.12092e+08	0	0	1.0959e+08	0	0	104331359	0	0	9.01384e+07	0	0	1.48321e+08	0	0	1.66531e+08	0	0	1.44639e+08	0	0
Q9QYC0	479	0.496567	0	81.89	R	SSPKSKTKWTKEDGHRTSTSAVPNLFVPLNT	EDGH(0.497)R(0.497)TSTSAVPNLFVPLNTNPK(0.007)	0	0	0	0	0	0	0	0	0	0	0	0	0	0	0	0	0	0	0	0	0	0	0	0	0	0	0	0	0	0	0	0	0	0	0	0
Q9QYI5	243	0.912506	10.1826	134.57	R	APGLGVMQVRPTSLSRPPDHDLSEDEDLQLA	PTSLSR(0.913)PPDH(0.087)DLSEDEDLQLAMAYSLSEMEAAGQKPAGGR	0	0	0	7.40701e+07	0	0	0	0	0	1.13231e+08	0	0	4.56668e+07	0	0	7.03321e+07	0	0	1.46865e+08	0	0	3.90326e+07	0	0	1.15789e+08	0	0	0	0	0	0	0	0	0	0	0
Q9QYR6	2062	0.934695	8.77961	83.317	R	PSPPLNGSTTSCGPDRRTPSPKEAGRSHWDD	APISLSQDPSPPLNGSTTSCGPDR(0.935)R(0.558)TPSPK(0.507)	0	2.13433e+07	0	0	0	0	0	8.43129e+06	0	0	3.5859e+07	0	0	3.43093e+07	0	0	3.42922e+07	0	0	0	0	0	0	0	0	1.29912e+07	0	0	4.56852e+07	0	0	4.83074e+07	0	0	3.24589e+07	0
Q9QYR6	2063	0.897271	8.88422	83.317	R	SPPLNGSTTSCGPDRRTPSPKEAGRSHWDDG	APISLSQDPSPPLNGSTTSCGPDR(0.897)R(0.897)TPSPK(0.205)	0	2.13433e+07	0	0	0	0	0	8.43129e+06	0	0	3.5859e+07	0	0	3.43093e+07	0	0	3.42922e+07	0	0	0	0	0	0	0	0	1.29912e+07	0	0	4.56852e+07	0	0	4.83074e+07	0	0	3.24589e+07	0
Q9QYX7	3759	0.999654	36.0104	67.76	R	REKRERAYLQGVAEDRDYMSDSEVSSTRPSR	AYLQGVAEDR(1)DYMSDSEVSSTRPSR	1.43599e+07	0	0	17840630	0	0	1.75154e+07	0	0	9.72095e+06	0	0	1.15207e+07	0	0	1.4333e+07	0	0	0	0	0	1.67974e+07	0	0	1.62387e+07	0	0	2.80294e+07	0	0	0	0	0	0	0	0
Q9QYX7	4278	0.99999	49.9899	68.959	R	ARTKPTSLPISQSRGRIPIVAQNSEEESPLS	GR(1)IPIVAQNSEEESPLSPVGQPMGMAR	1.73679e+07	0	0	0	0	0	1.99853e+07	0	0	2.46269e+06	0	0	2.14324e+07	0	0	5.45111e+06	0	0	0	0	0	6.25954e+06	0	0	0	0	0	9.73657e+06	0	0	0	0	0	9.54738e+06	0	0
Q9QYX7	820	0.999934	41.7905	84.878	R	DTKPVPKGSPTPSGTRPTTGQATPQSQQPPK	GSPTPSGTR(1)PTTGQATPQSQQPPKPPEQSR	0	0	0	1.33863e+07	0	0	0	0	0	0	0	0	0	0	0	0	0	0	0	0	0	0	0	0	0	0	0	8.01012e+06	0	0	0	0	0	0	0	0
Q9QYX7	1715	0.904743	12.5696	58.294	R	PLLPTIEDSSEEEELREEEELLKEQEKQREL	SHGPLLPTIEDSSEEEELR(0.905)EEEELLK(0.05)EQEK(0.045)	0	0	0	2.79677e+07	0	0	2.3497e+07	0	0	1.19344e+07	0	0	0	0	0	2.69273e+07	0	0	1.46752e+07	0	0	0	0	0	2.07533e+07	0	0	0	0	0	0	0	0	2.67221e+07	0	0
Q9QZN4	274	0.939264	11.8934	121.45	R	ARTLPEETVVIGRRRRASDSNTHEGFFWQGL	R(0.939)ASDSNTH(0.061)EGFFWQGLWQR	5.07032e+06	0	0	8.22163e+07	0	0	1.01223e+08	0	0	1.06731e+08	0	0	1.37524e+08	0	0	1.1475e+07	0	0	0	0	0	0	0	0	8.54289e+07	0	0	2.59763e+07	0	0	0	0	0	1.05929e+07	0	0
Q9QZQ1	1215	0.997023	25.2497	64.592	R	VSTGNLCTEEQSPPPRPEAYPIPTQTYTREY	ITSVSTGNLCTEEQSPPPR(0.997)PEAYPIPTQTYTR(0.003)	7.26299e+06	0	0	1.55392e+07	0	0	1.49524e+07	0	0	1.19215e+07	0	0	2.09877e+07	0	0	8.06609e+06	0	0	2.60767e+07	0	0	1.3944e+07	0	0	2.06816e+07	0	0	0	0	0	2.33933e+07	0	0	1.61339e+07	0	0
Q9QZQ1	651	0.795717	5.90673	127.51	R	YVLYMACRYVLSSQHRPDISPTERTHKAIAV	YVLSSQH(0.204)R(0.796)PDISPTER	2.19633e+07	0	0	4.99312e+07	0	0	3.33823e+07	0	0	2.27844e+07	0	0	3.15611e+07	0	0	2.50776e+07	0	0	0	0	0	0	0	0	0	0	0	2.79605e+07	0	0	3.48486e+07	0	0	2.68607e+07	0	0
Q9R0K7	1103	0.999071	30.3171	122.16	R	GLNRIQTQIRVVKAFRSSLYEGLEKPESRTS	AFR(0.999)SSLYEGLEK(0.001)PESR	6.40764e+07	0	0	0	0	0	6.26895e+07	0	0	0	0	0	2.08155e+07	0	0	18791935	0	0	0	0	0	0	0	0	8.02395e+07	0	0	0	0	0	5.14682e+06	0	0	3.05095e+07	0	0
Q9R0N5	94	0.977319	16.3441	79.177	R	RSYIDKVQPEIEELDRSPSMPGQQVSDKHQL	VQPEIEELDR(0.977)SPSMPGQQVSDK(0.023)HQLGR	0	0	0	0	0	0	0	0	0	0	0	0	7.73535e+06	0	0	7.4786e+06	0	0	0	0	0	0	0	0	0	0	0	0	0	0	0	0	0	1.46442e+07	0	0
Q9R0Z9	336	0.999996	53.659	58.914	R	PSPVTRTRSLSTCNKRVGMYLEGFDPFSQST	R(1)VGMYLEGFDPFSQSTLNNVTEQNYK	8.53554e+06	0	0	0	0	0	4.77721e+06	0	0	1.48622e+07	0	0	6.0134e+06	0	0	2.41132e+07	0	0	0	0	0	2.22494e+07	0	0	1.01743e+07	0	0	1.1338e+07	0	0	0	0	0	0	0	0
Q9R190	428	0.993356	22.0003	133.88	R	AARGTTEPHSRGHLSRPEAQSLSPYTTSANR	GHLSR(0.993)PEAQSLSPYTTSANR(0.006)	0	0	0	0	0	0	6.34802e+06	0	0	0	0	0	0	0	0	0	0	0	0	0	0	0	0	0	0	0	0	0	0	0	0	0	0	0	0	0
Q9R1L5	88	1	88.8439	92.089	R	PAHFSFASSRRADGRRWSLASLPSSGYGTNT	R(1)WSLASLPSSGYGTNTPSSTVSSSCSSQER	0	0	0	1.30268e+07	0	0	1.23119e+07	0	0	1.98635e+07	0	0	3.2138e+07	0	0	3.29921e+07	0	0	1.8586e+07	0	0	1.40889e+07	0	0	2.1165e+07	0	0	1.54805e+07	0	0	0	0	0	1.98222e+07	0	0
Q9WTJ2	3	0.999944	42.482	91.9	R	_____________MPRAFLVKKPCVSTCKRN	MPR(1)AFLVK	0	0	0	0	0	0	0	0	0	0	0	0	0	0	0	0	0	0	0	0	0	0	0	0	0	0	0	0	0	0	0	0	0	0	0	0
Q9WU22	391	0.994192	22.7519	73.796	R	NSLSDDRLETQSLPSRSPPGTPNHRNSSFTQ	NSLSDDR(0.005)LETQSLPSR(0.994)SPPGTPNHR	0	0	0	3.218e+07	0	0	2.06277e+07	0	0	0	0	0	3.04685e+07	0	0	2.17329e+07	0	0	0	0	0	0	0	0	1.47873e+07	0	0	2.0319e+07	0	0	0	0	0	2.96443e+07	0	0
Q9WV18	925	0.97995	17.1101	119.74	R	ELRHQLQSRQQIRSRRHPPTPPDPSGGLPRG	R(0.98)H(0.019)PPTPPDPSGGLPR(0.001)	140789627	0	0	0	0	0	1.5963e+08	0	0	150940029	0	0	190048510	0	0	2.12482e+08	0	0	1.24846e+08	0	0	1.89569e+08	0	0	1.1496e+08	0	0	3.25937e+07	0	0	1.69443e+08	0	0	122195965	0	0
Q9WV69	273	0.826883	6.88191	84.436	R	EKSLPIRRKTRSLPDRTPFHTSLHSGTSKSS	TR(0.17)SLPDR(0.827)TPFHTSLHSGTSK(0.003)	5.54689e+06	0	0	0	0	0	6.42046e+06	0	0	7.79531e+06	0	0	0	0	0	0	0	0	3.04652e+06	0	0	7.64319e+06	0	0	3.63741e+06	0	0	4.76801e+06	0	0	0	0	0	0	0	0
Q9WV92	433	0.96242	14.0841	133.42	R	GRTQAQTRRASALIDRPAPYFERSSSKRYTM	RASALIDR(0.962)PAPYFER(0.038)	7.27752e+07	0	0	9.1833e+07	0	0	6.34616e+07	0	0	9.37408e+07	0	0	1.4845e+08	0	0	0	0	0	7.41703e+07	0	0	1.1677e+08	0	0	8.39834e+07	0	0	112641694	0	0	8.45167e+07	0	0	6.99349e+07	0	0
Q9WV96	9	1	52.5198	64.827	R	_______MEQQQQQLRNLRDFLLVYNRMTEL	EQQQQQLR(1)NLR(1)DFLLVYNR(1)	0	0	2.52731e+07	0	0	0	0	0	0	0	0	1.03005e+08	0	0	6.09043e+07	0	0	7.97256e+06	0	0	5.12202e+07	0	0	5.86397e+07	0	0	6.25566e+07	0	0	1.73916e+08	0	0	4.10928e+07	0	0	7.15802e+07
Q9WV96	12	1	52.5198	64.827	R	____MEQQQQQLRNLRDFLLVYNRMTELCFQ	EQQQQQLR(1)NLR(1)DFLLVYNR(1)	0	0	2.52731e+07	0	0	0	0	0	0	0	0	1.03005e+08	0	0	6.09043e+07	0	0	7.97256e+06	0	0	5.12202e+07	0	0	5.86397e+07	0	0	6.25566e+07	0	0	1.73916e+08	0	0	4.10928e+07	0	0	7.15802e+07
Q9WVF8	48	0.999988	50.8843	101.33	R	VRSRARAVPPFVFTRRGSMFYDEDGDLAHEF	R(1)GSMFYDEDGDLAHEFYEETIVTK	2.04368e+08	0	0	1.13517e+08	0	0	1.71368e+08	0	0	1.45119e+08	0	0	1.88555e+08	0	0	2.4504e+08	0	0	1.38321e+08	0	0	1.86858e+08	0	0	1.80324e+08	0	0	186429425	0	0	2.18211e+08	0	0	1.89764e+08	0	0
Q9Z0H8	22	0.99591	23.8761	149.8	R	LKPPGRGGKHSSPVGRPSVGSASSSVVASTS	H(0.004)SSPVGR(0.996)PSVGSASSSVVASTSGSK	6.64118e+06	0	0	1.38664e+07	0	0	4.87573e+06	0	0	1.18812e+07	0	0	1.65953e+07	0	0	1.45719e+07	0	0	0	0	0	5.06405e+06	0	0	8.01151e+06	0	0	1.5119e+07	0	0	2.01513e+07	0	0	1.01789e+07	0	0
Q9Z0P4	119	0.973235	18.2658	82.859	R	APAASKENSAAPSPGRPQSASPAKEEQKSET	ENSAAPSPGR(0.973)PQSASPAK(0.015)EEQK(0.012)	0	0	0	1.30969e+07	0	0	1.3915e+07	0	0	0	0	0	3.89366e+06	0	0	0	0	0	0	0	0	0	0	0	5.59088e+06	0	0	0	0	0	4.90924e+06	0	0	0	0	0
Q9Z0P4	156	0.996177	24.1598	129.74	R	TPLGTPKENRTSTPVRSPGGSTMMKAAMYSV	TSTPVR(0.996)SPGGSTMMK(0.004)	0	0	0	0	0	0	0	0	0	0	0	0	0	0	0	0	0	0	0	0	0	4.64941e+07	0	0	0	0	0	1.44273e+06	0	0	0	0	0	0	0	0
Q9Z0V2	550	0.999117	30.5343	90.765	R	KKTFRIPNANVSGSHRGSVQELSTIQIRCVE	IPNANVSGSH(1)R(0.999)GSVQELSTIQIR(0.001)	4.32977e+07	0	0	6.29363e+07	2.14733e+07	0	4.40942e+07	2.02439e+07	0	6.35159e+07	1.60676e+07	0	4.80315e+07	2.40272e+07	0	4.3135e+07	3.32549e+07	0	7.60085e+07	1.95505e+07	0	3.78278e+07	5.21747e+07	0	14261249	0	0	4.65594e+07	0	0	4.90328e+07	0	0	4.92653e+07	0	0
Q9Z0W3	1119	0.924837	10.9006	86.791	R	EYAWIVQPASGAVSDRPGASPKRNHDGECTA	LIRPEYAWIVQPASGAVSDR(0.925)PGASPK(0.075)	4.533e+07	0	0	7.22168e+07	0	0	6.05915e+07	0	0	0	0	0	3.43003e+07	0	0	2.31859e+07	0	0	0	0	0	0	0	0	0	0	0	0	0	0	8.18728e+07	0	0	2.11726e+07	0	0
Q9Z123	732	0.965798	14.2231	60.177	R	TSYSQDPPSPSPEDERLPLALGKRGSGFGGF	DK(0.096)VGLDLGAPPSGTTSYSQDPPSPSPEDER(0.966)LPLALGK(0.939)	0	0	0	0	0	0	0	0	0	0	0	0	0	0	0	0	1.09104e+07	0	0	0	0	0	0	0	0	0	0	0	0	0	0	0	0	0	0	0
Q9Z140	21	0.859337	10.7558	42.536	R	MGWVPEPPAMTLGASRVELRVSCHGLLDRDT	MSDPEMGWVPEPPAMTLGASR(0.859)VELR(0.091)VSCH(0.094)GLLDR(0.955)	0	0	0	0	1.60994e+07	0	0	1.24751e+07	0	0	9.84029e+07	0	0	2.35727e+07	0	0	5.23076e+07	0	0	6.22899e+07	0	0	3.97371e+07	0	0	3.54405e+07	0	0	2.82155e+07	0	0	3.77972e+07	0	0	4.72687e+07	0
Q9Z160	404	0.98716	18.8873	50.493	R	LSNESASHSWEVVCQRLLEKPLLFWEDLMQQ	GLAGIR(0.001)DAIWDLLSNESASH(0.994)SWEVVCQR(0.987)LLEK(0.018)	0	0	0	0	0	0	0	0	0	0	0	0	0	0	0	0	1.16259e+08	0	0	0	0	0	0	0	0	0	0	0	0	0	0	0	0	0	7.03343e+07	0
Q9Z1J2	428	1	84.0655	147.17	R	GNTKSSDQPGNLLPRRSSDGGDGEGSELVKP	R(1)SSDGGDGEGSELVKPLYPSNK	1.06897e+07	0	0	0	0	0	1.18029e+07	0	0	1.23216e+07	0	0	1.62354e+07	0	0	8.15633e+06	0	0	0	0	0	0	0	0	0	0	0	0	0	0	0	0	0	0	0	0
Q9Z2H5	680	0.999536	33.3342	104.79	R	SSQEDESGGLEDSPDRGACSTPEMPQFESVK	GPSSQEDESGGLEDSPDR(1)GACSTPEMPQFESVK	5.17696e+07	0	0	7.28019e+07	0	0	5.47948e+07	0	0	3.94419e+07	0	0	6.7827e+06	0	0	6.35428e+07	0	0	4.26044e+07	0	0	4.50556e+07	0	0	4.72374e+07	0	0	0	0	0	8.42412e+07	0	0	5.66242e+07	0	0
Q9Z2H5	55	0.98948	19.7756	105.17	R	PETNSNEKHLTQQDTRPAEQSLDMDDKDYSE	HLTQQDTR(0.989)PAEQSLDMDDK(0.01)DYSEADGLSER	0	0	0	0	0	0	0	0	0	0	0	0	0	0	0	0	0	0	0	0	0	0	0	0	0	0	0	0	0	0	0	0	0	4.84442e+06	0	0
S4R1M9	189	1	64.623	97.776	R	YHMEMSSKTTPGSRSRSLTLLPHGTPSSASP	SR(1)SLTLLPHGTPSSASPCSQR	4.10931e+07	0	0	3.90416e+07	0	0	1.72158e+07	0	0	2.16047e+07	0	0	1.37092e+07	0	0	3.84653e+07	0	0	7.88793e+06	0	0	9.39412e+06	0	0	3.77135e+07	0	0	0	0	0	1.04134e+07	0	0	1.70471e+07	0	0

## Sheet: Filtered sites
Proteins	Positions within proteins	Localization prob	Score diff	Score	Amino acid	Sequence window	Phosphorylation(HKR) Probabilities	Normalized-intensity AD_Cor_1___1	Normalized-intensity AD_Cor_1___2	Normalized-intensity AD_Cor_1___3	Normalized-intensity AD_Cor_2___1	Normalized-intensity AD_Cor_2___2	Normalized-intensity AD_Cor_2___3	Normalized-intensity AD_Cor_3___1	Normalized-intensity AD_Cor_3___2	Normalized-intensity AD_Cor_3___3	Normalized-intensity AD_Others_1___1	Normalized-intensity AD_Others_1___2	Normalized-intensity AD_Others_1___3	Normalized-intensity AD_Others_2___1	Normalized-intensity AD_Others_2___2	Normalized-intensity AD_Others_2___3	Normalized-intensity AD_Others_3___1	Normalized-intensity AD_Others_3___2	Normalized-intensity AD_Others_3___3	Normalized-intensity WT_Cor_1___1	Normalized-intensity WT_Cor_1___2	Normalized-intensity WT_Cor_1___3	Normalized-intensity WT_Cor_2___1	Normalized-intensity WT_Cor_2___2	Normalized-intensity WT_Cor_2___3	Normalized-intensity WT_Cor_3___1	Normalized-intensity WT_Cor_3___2	Normalized-intensity WT_Cor_3___3	Normalized-intensity WT_Others_1___1	Normalized-intensity WT_Others_1___2	Normalized-intensity WT_Others_1___3	Normalized-intensity WT_Others_2___1	Normalized-intensity WT_Others_2___2	Normalized-intensity WT_Others_2___3	Normalized-intensity WT_Others_3___1	Normalized-intensity WT_Others_3___2	Normalized-intensity WT_Others_3___3
A0A1W2P872	10	0.987149	18.9234	187.16	K	______MEPEAPDSRKRPLETPPEVVCTKRS	K(0.987)R(0.013)PLETPPEVVCTK	0	0	0	0	0	0	9.56261e+06	0	0	0	0	0	1.50596e+07	0	0	1.55412e+07	0	0	1.87925e+07	0	0	0	0	0	0	0	0	0	0	0	0	0	0	0	0	0
A2A5R2	215	0.990639	20.2458	185.58	K	QVLQEARELEKPMQSKPQSPVIQATAGSPKF	ELEK(0.009)PMQSK(0.991)PQSPVIQATAGSPK(1)	0	30029723	0	0	0	0	0	0	0	0	0	0	0	0	0	0	0	0	0	0	0	0	0	0	0	0	0	0	3.30901e+07	0	0	0	0	0	1.14171e+08	0
A2A5R2	241	0.983616	18.0788	161.56	K	GSPKFSRLKQSQAQSKPTTPEKAELPNGDHA	QSQAQSK(0.984)PTTPEK(0.001)AELPNGDHAQSGLGK(0.015)	0	0	0	1.89906e+07	0	0	1.33248e+07	0	0	0	0	0	1.80934e+07	0	0	2.71521e+07	0	0	0	0	0	0	0	0	1.12128e+07	0	0	1.61957e+07	0	0	1.17421e+07	0	0	2.43858e+07	0	0
A2A690	1582	0.940409	11.9814	228.32	K	RYQQETNVSQLPGRPKSPLSKMAQRPYQMPQ	YQQETNVSQLPGRPK(0.94)SPLSK(0.06)	0	0	0	8.85262e+06	0	0	4.43103e+06	0	0	0	0	0	6.20589e+06	0	0	4.98813e+06	0	0	0	0	0	0	0	0	3.44867e+06	0	0	4.85316e+06	0	0	0	0	0	0	0	0
A2AHC3	1059	0.989183	19.6396	86.987	K	VPTPGTKNNCQDQKIKAPVHFVEPLSPTGVP	IK(0.989)APVH(0.011)FVEPLSPTGVPGHR	9.37836e+06	0	0	1.08281e+07	0	0	0	0	0	0	0	0	1.69282e+07	0	0	6.7553e+06	0	0	0	0	0	0	0	0	0	0	0	0	0	0	0	0	0	6.03961e+06	0	0
A2AJI0	493	0.963184	14.2101	106.57	K	ASPCPSPGPGHALPPKPPSPRGTTASPKGRV	PASPCPSPGPGHALPPK(0.963)PPSPR(0.037)	0	0	0	6.80535e+06	0	0	4.45927e+06	0	0	6.0139e+06	0	0	3.96196e+06	0	0	8.07569e+06	0	0	2.73164e+06	0	0	4.60142e+06	0	0	0	0	0	2.57923e+06	0	0	5.42283e+06	0	0	8.16059e+06	0	0
A2AJI0	395	0.999998	56.7629	162.22	K	SAHRCTPSGERPERRKPGAGGSPALARRRLE	RK(1)PGAGGSPALAR	0	0	0	1.61492e+07	0	0	2843296	0	0	5.14965e+06	0	0	1.59686e+06	0	0	5.1763e+06	0	0	1.32018e+07	0	0	0	0	0	0	0	0	1.8393e+06	0	0	1.07776e+07	0	0	419367	0	0
A2ALS5	483	1	90.5702	197.19	K	PDLAKAAGISLIVPGKSPTRKKSGPFGSRRS	AAGISLIVPGK(1)SPTR	0	0	0	7.48279e+06	0	0	0	0	0	7.05658e+06	0	0	8.53427e+06	0	0	2.82653e+06	0	0	0	0	0	0	0	0	3.85487e+06	0	0	5.6943e+06	0	0	1.05288e+07	0	0	8.07855e+06	0	0
A2AP18	984	1	99.5047	188.96	K	VKQTLGLKGLFLRGTKPGSLDSHAAGQPLPR	GTK(1)PGSLDSHAAGQPLPR	1.78869e+08	0	0	2.31741e+08	0	0	1.72404e+08	0	0	1.35726e+08	0	0	7.85587e+07	0	0	1.05896e+08	0	0	1.15564e+08	0	0	1.56989e+08	0	0	2.68211e+08	0	0	3.29517e+07	0	0	1.45774e+08	0	0	5.91455e+07	0	0
A2ARZ3	1294	0.928452	12.2603	55.051	K	LIEKSLHSQLSTYTMKIVNIILHAIQSELEI	SLH(0.072)SQLSTYTMK(0.928)IVNIILH(0.15)AIQSELEINK(0.85)	0	2.91288e+07	0	0	5.75498e+07	0	0	5.67176e+07	0	0	6.23379e+07	0	0	0	0	0	0	0	0	0	0	0	4.68161e+07	0	0	0	0	0	0	0	0	0	0	0	0	0
A2RSJ4	417	0.999993	53.8904	161.49	K	MLKQAMKDRNLGSPPKSPTHASPQHTQTEKD	NLGSPPK(1)SPTHASPQHTQTEK	4.27621e+07	0	0	6.67549e+07	0	0	4.7945e+07	0	0	8.37949e+07	0	0	4.15306e+07	0	0	5.328e+07	0	0	5.89084e+07	0	0	5.27157e+07	0	0	3.83793e+07	0	0	3.66432e+07	0	0	0	0	0	5.05175e+07	0	0
B1AZP2	918	1	91.1698	177.36	K	YHLKANSWQLVETPEKRKEEKKPPPPVPKKP	ANSWQLVETPEK(1)R	0	0	0	8.19128e+06	0	0	5.52524e+06	0	0	0	0	0	3.68983e+06	0	0	0	0	0	0	0	0	0	0	0	0	0	0	0	0	0	0	0	0	0	0	0
B9EHT4	397	0.900473	9.56528	224.34	K	FSRVTGKGRREHKGKKKSPSSPSLGSLQQRE	K(0.9)K(0.1)SPSSPSLGSLQQR	5.98553e+07	0	0	4.42491e+07	0	0	5.02345e+07	0	0	5.15875e+07	0	0	4.2123e+07	0	0	6.12484e+07	0	0	4.63279e+07	0	0	6.04676e+07	0	0	4.43252e+07	0	0	6.47869e+07	0	0	5.61581e+07	0	0	4.43388e+07	0	0
B9EHT4	398	0.5	0	162.88	K	SRVTGKGRREHKGKKKSPSSPSLGSLQQREG	K(0.5)K(0.5)SPSSPSLGSLQQR	5.98553e+07	0	0	4.42491e+07	0	0	5.02345e+07	0	0	5.15875e+07	0	0	4.2123e+07	0	0	6.12484e+07	0	0	4.63279e+07	0	0	2.64269e+07	0	0	1.90004e+07	0	0	6.47869e+07	0	0	5.61581e+07	0	0	4.43388e+07	0	0
E9PUL5	96	0.992422	21.1715	62.345	K	TVQATDLSLNPEEGSKASPSPSPSEARQEPA	AELAPETTETPVETPETVQATDLSLNPEEGSK(0.992)ASPSPSPSEAR(0.008)	0	0	0	0	0	0	0	0	0	0	0	0	0	0	0	0	0	0	0	0	0	0	0	0	0	0	0	0	0	0	0	0	0	1.38842e+07	0	0
E9PUL5	213	0.999071	30.3143	109.17	K	GEEGPAPQPHSPPSTKTPPANGAPPRVLQKL	QENGAVVPLQAGDGEEGPAPQPH(1)SPPSTK(0.999)TPPANGAPPR(0.001)	1.14266e+07	8.81233e+06	0	0	0	0	0	8.29043e+06	0	0	0	0	8.61669e+06	0	0	0	9.22519e+06	0	1.50043e+07	0	0	1.42859e+07	0	0	0	1.15066e+07	0	0	0	0	0	0	0	9.58221e+06	0	0
E9PV86	944	0.841661	10.4838	83.411	K	VQYQELKPDHSHSPYKRKKNNLG________	VPSDVQVVQYQELK(0.005)PDH(0.075)SH(0.069)SPYK(0.842)R(0.009)	1.70289e+07	0	0	1.80865e+07	0	0	1.93689e+07	0	0	0	0	0	0	0	0	6.23117e+06	0	0	2.21325e+07	0	0	2.44428e+07	0	0	0	0	0	0	0	0	0	0	0	0	0	0
E9PVB3	136	0.986049	18.4931	130.56	K	IADARKLNIIEISQIKRKIETMNNEVKFLTN	LNIIEISQIK(0.986)R(0.014)	5.22899e+06	0	0	1.38438e+07	0	0	1.0372e+07	0	0	7.82613e+06	0	0	9.09158e+06	0	0	6.49139e+06	0	0	4.89508e+07	0	0	2.42714e+07	0	0	3.4588e+07	0	0	4.65765e+06	0	0	2.01483e+07	0	0	0	0	0
E9Q394	2314	0.774368	5.51369	62.67	K	NRDEDEGIPSENEEEKKLLDTKARELKEQLQ	NSWIQIIQDTINSLNR(0.008)DEDEGIPSENEEEK(0.774)K(0.218)	0	0	0	9.10938e+06	0	0	9.79887e+06	0	0	0	0	0	5.00274e+06	0	0	7.45931e+06	0	0	0	0	0	0	0	0	1.54366e+07	0	0	7.45973e+06	0	0	8.52243e+06	0	0	7.94467e+06	0	0
E9Q6P5	204	0.999997	54.6105	113.33	K	EIERVMLTNIQNRSPKPGPAPHDQELGFFLE	SPK(1)PGPAPHDQELGFFLETGLQR	7.89892e+07	0	0	8.68145e+07	0	0	6.46063e+07	0	0	6.99999e+07	0	0	7.34793e+07	0	0	8.30283e+07	0	0	1.48965e+08	0	0	1.29679e+08	0	0	1.34272e+08	0	0	1.34132e+08	0	0	1.93685e+08	0	0	1.23117e+08	0	0
E9Q8I9	1954	1	72.9712	73.936	K	SSPDLSSSSKLTASRKSTGQLNVNPGTPGSG	K(1)STGQLNVNPGTPGSGGGGGGSGNTTTAER	0	0	0	0	0	0	0	0	0	0	0	0	0	0	0	0	0	0	0	0	0	0	0	0	0	0	0	0	0	0	0	0	0	0	0	0
F6SEU4	1069	0.999998	57.515	212.87	K	GGGSGGGQPPPLQRGKSQQLTVSAAQKPRPS	GK(1)SQQLTVSAAQKPR	3.7027e+07	0	0	5.71491e+06	0	0	2.53475e+07	0	0	0	0	0	1.62803e+07	0	0	1.03558e+07	0	0	9.1259e+06	0	0	4.19306e+06	0	0	7.37173e+06	0	0	0	0	0	6.91729e+06	0	0	2.01078e+07	0	0
F6SEU4	1080	0.761179	5.03413	234.82	K	LQRGKSQQLTVSAAQKPRPSSGNLLQSPEPS	GK(0.239)SQQLTVSAAQK(0.761)PR	0	0	0	0	0	0	0	0	0	0	0	0	0	0	0	0	0	0	0	0	0	0	0	0	0	0	0	0	0	0	0	0	0	1.4624e+06	0	0
F6SEU4	994	0.378435	0.855621	53.553	K	FHGYSKSEDLSSGVPKPPAASILHSHSYSDE	SEDLSSGVPK(0.378)PPAASILH(0.311)SH(0.311)SYSDEFGPSGTDFTR	0	0	0	0	0	0	0	0	0	0	0	0	0	0	0	0	0	0	0	0	0	0	0	0	0	0	0	0	0	0	0	0	0	0	0	0
F8VPU2	432	0.999924	41.1765	127.37	K	ACTLELGPHQSPALPKSPPGSKAADGTTVVP	ACTLELGPHQSPALPK(1)SPPGSK(1)	6.89174e+07	0	0	6.63332e+07	0	0	3.26922e+07	3.44488e+06	0	1.56452e+07	0	0	3.68388e+07	0	0	0	0	0	0	0	0	6.91883e+07	7.15029e+06	0	7.11522e+07	9.51678e+06	0	2.08381e+07	0	0	0	0	0	5.82656e+07	0	0
G3X9K3	1557	0.81983	10.1164	96.197	K	TSGEAEPPSPSAVSEKPLDAISQKSVDIHDS	TTIPH(0.025)ALLTWR(0.075)PTSGEAEPPSPSAVSEK(0.82)PLDAISQK(0.08)	0	0	0	1.05184e+07	0	0	5.11266e+06	0	0	5.3673e+06	0	0	1.77107e+07	0	0	0	0	0	1.00473e+07	0	0	0	0	0	0	0	0	9.19968e+06	0	0	8.35113e+06	0	0	12635945	0	0
G5E829	19	1	81.1494	186.36	K	MANNSVAYSGVKNSLKEANHDGDFGITLTEL	NSLK(1)EANHDGDFGITLTELR	7.12252e+06	0	0	1.46872e+07	0	0	1.29872e+07	0	0	0	0	0	0	0	0	0	0	0	0	0	0	0	0	0	5.75817e+06	0	0	0	0	0	0	0	0	0	0	0
O08539	347	0.492597	0	100.11	K	SPSQLRKGPPVPPPPKHTPSKEMKQEQILSL	KGPPVPPPPK(0.493)H(0.493)TPSK(0.015)	0	0	0	0	0	0	0	0	0	0	0	0	0	0	0	0	0	0	0	0	0	0	0	0	0	0	0	0	0	0	0	0	0	0	0	0
O08582	585	0.996072	24.0414	197.7	K	ITKLLQTTNNSPMNSKPQQIKMQSTKKGPLS	LLQTTNNSPMNSK(0.996)PQQIK(0.004)	5.72618e+06	0	0	1.0839e+07	0	0	0	0	0	0	0	0	1.30499e+07	0	0	5.02051e+06	0	0	0	0	0	6.79772e+06	0	0	6.91322e+06	0	0	7.2687e+06	0	0	5.80632e+06	0	0	9.03817e+06	0	0
O08919	274	0.999981	47.1413	82.331	K	PGHVSPTPATTSPGEKGEAGTPVAAGTTAAA	AEAAAAPAVAPGPAQPGH(1)VSPTPATTSPGEK(1)GEAGTPVAAGTTAAAIPR	1.9994e+07	1.96245e+07	0	1.16139e+07	2.66505e+07	0	1.35364e+07	1.83442e+07	0	1.17189e+07	2.11591e+07	0	1.16015e+07	2.20509e+07	0	0	2.35047e+07	0	2.83955e+07	2.0431e+07	0	0	1.9932e+07	0	0	2.19712e+07	0	6.0474e+06	2.26455e+07	0	0	5.35551e+07	0	0	4.65722e+07	0
O09106	403	0.999782	36.6178	95.629	K	AIPEESGDEDEEDPDKRISICSSDKRIACEE	MLPHAPGVQMQAIPEDAIPEESGDEDEEDPDK(1)R	3.3482e+07	0	0	2.87745e+07	0	0	2.9928e+07	0	0	2.1366e+07	0	0	3.06031e+07	0	0	2.78237e+07	0	0	2.82775e+07	0	0	0	0	0	4.78143e+06	0	0	2.79967e+07	0	0	3.80586e+07	0	0	2.80617e+07	0	0
O35526	12	1	94.1748	127.01	K	____MKDRTQELRTAKDSDDDDDVTVTVDRD	TAK(1)DSDDDDDVTVTVDRDR	0	0	0	0	0	0	0	0	0	0	0	0	0	0	0	0	0	0	1.19763e+07	0	0	9.47335e+06	0	0	2.23675e+06	0	0	0	0	0	0	0	0	0	0	0
O35633	98	0.999996	56.2022	164.63	K	IHYQRGGAPLPPSGSKDQAVGAGGEFGGHDK	GGAPLPPSGSK(1)DQAVGAGGEFGGHDKPK	2.98616e+08	0	0	3.22158e+08	0	0	1.73694e+08	0	0	5.32386e+08	0	0	5.3443e+08	0	0	5.51856e+08	0	0	2.5881e+08	0	0	3.20226e+08	0	0	2.78004e+08	0	0	4.80423e+08	0	0	6.54022e+08	0	0	7.53668e+08	0	0
O35633	113	0.54655	1.07954	145.67	K	KDQAVGAGGEFGGHDKPKITAWEAGWNVTNA	GGAPLPPSGSK(0.027)DQAVGAGGEFGGHDK(0.547)PK(0.426)	0	0	0	0	0	0	0	0	0	0	0	0	0	0	0	0	0	0	0	0	0	0	0	0	0	0	0	0	0	0	0	0	0	0	0	0
O35633	64	1	69.7782	85.745	K	DLDFEHRQGLQMDILKSEGEPCGDEGAEAPV	QGLQMDILK(1)SEGEPCGDEGAEAPVEGDIHYQR	0	0	0	0	0	0	0	0	0	0	0	0	4.43792e+06	0	0	0	0	0	0	0	0	0	0	0	0	0	0	0	0	0	0	0	0	0	0	0
O35681	378	0.999997	55.1768	116.74	K	ETFQFSVPLAELAQRKLHFSVYDFDRFSRHD;EVFLFPVHYNDLEARKLHFSVYDFDRFSRHD	K(1)LHFSVYDFDR	8.08367e+06	0	0	0	0	0	0	0	0	8.27105e+06	0	0	8.60771e+06	0	0	8.42754e+06	0	0	1.16285e+07	0	0	0	0	0	1.16281e+07	0	0	2.09461e+07	0	0	1.85158e+07	0	0	1.65495e+07	0	0
O35926	82	0.976952	16.2724	183.31	K	KRLVAASAKKKKGSKKVTPKPASTGPDPLVQ	K(0.977)VTPK(0.023)PASTGPDPLVQQR	2.03891e+07	0	0	2.97502e+07	0	0	2.86416e+07	0	0	1.91474e+07	0	0	1.79604e+07	0	0	1.44619e+07	0	0	0	0	0	1.52422e+07	0	0	0	0	0	9.13292e+06	0	0	0	0	0	0	0	0
O35926	86	0.971416	15.3128	106.31	K	AASAKKKKGSKKVTPKPASTGPDPLVQQRNR	K(0.029)VTPK(0.971)PASTGPDPLVQQR	0	0	0	0	0	0	0	0	0	0	0	0	0	0	0	0	0	0	2.757e+07	0	0	0	0	0	3.11942e+07	0	0	0	0	0	1.94698e+07	0	0	0	0	0
O54774	789	0.999937	41.9978	72.292	K	TEEMPENALPSDEDDKDPNDPYRALDIDLDK	VDIITEEMPENALPSDEDDK(1)DPNDPYR	4.89325e+07	0	0	4.14404e+07	0	0	2.70766e+07	0	0	0	0	0	6.02613e+07	0	0	7.07198e+07	0	0	1.89769e+07	0	0	1.25723e+07	0	0	2.45505e+07	0	0	1.9694e+07	0	0	3.16565e+07	0	0	2.20696e+07	0	0
O54829	251	0.935167	11.8837	122.49	K	DIRSHSPTHTPTPETKPPTEDELHQQIKYWQ	SHSPTH(0.004)TPTPETK(0.935)PPTEDELHQQIK(0.061)	0	0	0	0	0	0	0	0	0	0	0	0	1.6827e+07	0	0	0	0	0	0	0	0	0	0	0	0	0	0	0	0	0	0	0	0	0	0	0
O55029	856	0.984559	20.4364	79.407	K	GFQPSRPTAQQEPDGKPASSPVIMASQTTHK	GFQPSR(0.009)PTAQQEPDGK(0.985)PASSPVIMASQTTHK(0.007)	5.74645e+07	0	0	3.01579e+07	0	0	1.15301e+07	0	0	1.09324e+07	0	0	2.88618e+07	0	0	5.51427e+07	0	0	8.4167e+06	0	0	0	0	0	0	0	0	0	0	0	0	0	0	0	0	0
O55106	131	0.99998	47.0025	135.47	K	YHKLKYGTELNQGDMKPPSYDSDEGNETEVQ	YGTELNQGDMK(1)PPSYDSDEGNETEVQPQQNSQLMWK	5.96207e+07	0	0	37481662	0	0	4.59268e+07	0	0	2.62548e+07	0	0	3.97371e+07	0	0	4.91928e+07	0	0	8.9086e+07	0	0	7.56397e+07	0	0	7.74138e+07	0	0	3.97055e+07	0	0	5.72126e+07	0	0	3.76447e+07	0	0
O70251	96	0.996162	27.0467	56.804	K	PSSVEDTTGSGAADAKDDDDIDLFGSDDEEE	YGPSSVEDTTGSGAADAK(0.996)DDDDIDLFGSDDEEESEEAK(0.002)K(0.002)	9.5133e+06	0	0	7.6577e+06	0	0	0	0	0	0	0	0	1.56953e+07	0	0	4.49128e+07	0	0	0	0	0	0	0	0	0	0	0	0	0	0	0	0	0	0	0	0
O88343	67	1	79.5064	143.72	K	KEKKEKERISENYSDKSDVENADESSSSILK	ISENYSDK(1)SDVENADESSSSILKPLISPAAER	4.53314e+07	4.502e+07	0	6.68351e+07	6.61379e+07	0	8.04375e+07	5.40659e+07	0	6.06396e+07	4.03726e+07	0	8.92512e+07	4.43253e+07	0	8.67097e+07	5.48649e+07	0	9.87707e+07	3.68536e+07	0	6.23294e+07	3.70983e+07	0	9.03694e+07	5.53934e+07	0	8.02007e+07	0	0	5.94038e+07	6.86002e+07	0	9.71299e+07	4.86462e+07	0
O88343	82	0.999993	51.2564	65.92	K	KSDVENADESSSSILKPLISPAAERIRFILG	ISENYSDK(1)SDVENADESSSSILK(1)PLISPAAER	0	4.502e+07	0	0	6.61379e+07	0	0	5.40659e+07	0	0	4.03726e+07	0	0	4.43253e+07	0	0	5.48649e+07	0	0	3.68536e+07	0	0	3.70983e+07	0	0	5.53934e+07	0	0	0	0	0	6.86002e+07	0	0	4.86462e+07	0
O88520	7	0.999982	47.39	168.26	K	_________MSSSLGKEKDSKEKDPKVPSAK	SSSLGK(1)EKDSK	0	0	0	0	0	0	0	0	0	0	0	0	0	0	0	0	0	0	0	0	0	0	0	0	0	0	0	0	0	0	0	0	0	0	0	0
O88705	556	0.999432	32.4517	100.86	K	DRLRRIGKKNSILQRKRSEPSPGSSGGVMEQ	K(0.999)R(0.001)SEPSPGSSGGVMEQHLVQHDR	0	0	0	1.9224e+07	0	0	1.29074e+07	0	0	3.00833e+07	0	0	2.51752e+07	0	0	2.18878e+07	0	0	1.49226e+07	0	0	9.84232e+06	0	0	0	0	0	0	0	0	2.2516e+07	0	0	0	0	0
O88737	3380	0.959322	13.7261	101.08	K	KRSKHRKQGMEQKISKFSPIEEAKDVESDLA	ISK(0.959)FSPIEEAK(0.041)DVESDLASYPPPTVSSSLTSR	1.89394e+08	0	0	1.57088e+08	0	0	1.40693e+08	0	0	0	0	0	121066066	0	0	5.20728e+07	0	0	433112765	0	0	2.90861e+08	0	0	2.75231e+08	0	0	7.68486e+07	0	0	5.10176e+07	0	0	0	0	0
O88737	3388	0.721665	4.13777	83.741	K	GMEQKISKFSPIEEAKDVESDLASYPPPTVS	ISK(0.278)FSPIEEAK(0.722)DVESDLASYPPPTVSSSLTSR	0	0	0	0	0	0	3.21034e+07	0	0	5.10612e+07	0	0	0	0	0	3.36866e+07	0	0	0	0	0	0	0	0	0	0	0	0	0	0	1.09534e+08	0	0	8.7882e+07	0	0
O88935	634	0.926598	11.0637	84.855	K	QQPRPSGPGPAGRPAKPQLAQKPSQDVPPPI	PAK(0.927)PQLAQK(0.073)PSQDVPPPITAAAGGPPHPQLNK(0.001)	0	0	0	0	0	0	0	0	0	0	0	0	0	0	0	7.3337e+06	0	0	0	0	0	0	0	0	0	0	0	0	0	0	0	0	0	0	0	0
O88935	640	0.944106	12.3295	87.991	K	GPGPAGRPAKPQLAQKPSQDVPPPITAAAGG	PAK(0.055)PQLAQK(0.944)PSQDVPPPITAAAGGPPHPQLNK(0.001)	5.32082e+06	0	0	1.32011e+07	0	0	8.76294e+06	0	0	1.51344e+07	0	0	1.57051e+07	0	0	2.35826e+07	0	0	0	0	0	0	0	0	0	0	0	0	0	0	0	0	0	2.42473e+07	0	0
O89084	202	0.852453	8.21043	117.62	K	RSNFSLLTNVPIPSNKRSPLGGPPSVCKATL	SNFSLLTNVPIPSNK(0.852)R(0.129)SPLGGPPSVCK(0.019)	0	0	0	0	0	0	6.83253e+06	0	0	0	0	0	0	0	0	0	0	0	0	0	0	0	0	0	0	0	0	0	0	0	0	0	0	0	0	0
P04370	145	1	176.885	182.92	K	GLDVMASQKRPSQRSKYLATASTMDHARHGF	SK(1)YLATASTMDHAR	1.09927e+08	0	0	9.41749e+07	0	0	4.50884e+07	0	0	1.5064e+08	0	0	3.23142e+08	0	0	2.10314e+08	0	0	0	0	0	0	0	0	0	0	0	7.61739e+07	0	0	8.86875e+07	0	0	1.82597e+08	0	0
P04370	205	1	131.297	261.17	K	KDSHTRTTHYGSLPQKSQHGRTQDENPVVHF	TTHYGSLPQK(1)SQHGR	1.32424e+08	0	0	126308237	0	0	8.68319e+07	0	0	4.86168e+08	0	0	6.09329e+08	0	0	3.48738e+08	0	0	1.66246e+08	0	0	1.18219e+08	0	0	9.93679e+07	0	0	3.15185e+08	0	0	1.78969e+08	0	0	2.85547e+08	0	0
P05064	230	0.991497	22.5686	64.962	K	KALSDHHVYLEGTLLKPNMVTPGHACTQKFS	ALSDHHVYLEGTLLK(0.991)PNMVTPGH(0.003)ACTQK(0.005)	0	0	0	0	0	0	0	0	0	0	0	0	0	0	0	0	0	0	0	0	0	0	0	0	6.84983e+06	0	0	0	0	0	0	0	0	0	0	0
P09405	412	1	134.517	144.17	K	LLAKNLSFNITEDELKEVFEDAMEIRLVSQD	NLSFNITEDELK(1)EVFEDAMEIR	1.7617e+07	0	0	2.6172e+07	0	0	2.67777e+07	0	0	1.18236e+07	0	0	1.37304e+07	0	0	1.40083e+07	0	0	5.01882e+07	0	0	4.15877e+07	0	0	2.12657e+07	0	0	2.28927e+07	0	0	2.23789e+07	0	0	1.87782e+07	0	0
P0C1Q2	160	0.999969	45.1107	80.813	K	AQEPLSSVRRRALLRKASSLPPTTAHILSAL	K(1)ASSLPPTTAHILSALLESR	0	0	0	0	0	0	0	0	0	0	0	0	4.92799e+06	0	0	4.00222e+06	0	0	0	0	0	0	0	0	0	0	0	0	0	0	0	0	0	0	0	0
P0DW27	2	0.999992	49.1228	70.145	K	______________MKDEVVVVTGLAAMEPL	K(1)DEVVVVTGLAAMEPLIVH(0.439)R(0.439)MIVER(0.121)	0	0	0	0	1.01994e+07	0	0	0	0	0	0	0	0	4.13054e+06	0	0	0	0	0	0	0	0	0	0	0	0	0	0	0	0	0	1.20996e+07	0	0	0	0
P10636-7	356	0.999998	57.7422	173.45	K	KIETHKLTFRENAKAKTDHGAEIVYKSPVVS	AK(1)TDHGAEIVYK(1)SPVVSGDTSPR(1)	0	8.67116e+07	3.77764e+06	0	0	4.58418e+06	0	1.4948e+08	0	0	9.08044e+07	0	0	7.69961e+07	0	0	9.71974e+07	0	0	0	0	0	0	0	0	0	0	0	2.01194e+07	0	0	1.44143e+07	0	0	1.6236e+07	0
P10636-7	366	1	121.319	293.08	K	ENAKAKTDHGAEIVYKSPVVSGDTSPRHLSN	TDHGAEIVYK(1)SPVVSGDTSPR	5.60294e+07	8.67116e+07	3.77764e+06	4.19243e+07	0	4.58418e+06	3.62792e+07	1.4948e+08	0	4.10509e+07	9.08044e+07	0	4.83587e+07	7.69961e+07	0	3.47119e+07	9.71974e+07	0	0	0	0	1.43696e+07	0	0	0	0	0	0	2.01194e+07	0	0	1.44143e+07	0	4.75636e+07	1.6236e+07	0
P10636-7	302	0.67382	3.31552	147.09	K	SKVTSKCGSLGNIHHKPGGGQVEVKSEKLDF	CGSLGNIH(0.011)H(0.001)K(0.674)PGGGQVEVK(0.314)	2.91571e+06	0	0	0	0	0	0	0	0	0	0	0	0	0	0	0	0	0	0	0	0	0	0	0	0	0	0	0	0	0	0	0	0	0	0	0
P10636-7	145	1	85.9835	187.04	K	PPGQKGQANATRIPAKTPPAPKTPPSSGEPP	IPAK(1)TPPAPK(0.999)TPPSSGEPPK(0.001)	0	4.13795e+07	0	0	0	0	0	2.42095e+07	0	0	7.41529e+06	0	0	5.98745e+06	0	0	0	0	0	0	0	0	0	0	0	0	0	0	0	0	0	0	0	0	0	0
P10636-7	151	0.999998	57.7296	212.92	K	QANATRIPAKTPPAPKTPPSSGEPPKSGDRS	TPPAPK(1)TPPSSGEPPKSGDR	3.36322e+07	2.90008e+06	0	3.50044e+07	0	0	2.66123e+07	0	0	1.43273e+07	0	0	1.95687e+07	0	0	1.56721e+07	0	0	0	0	0	0	0	0	0	0	0	0	0	0	0	0	0	0	0	0
P10636-7	292	0.999989	51.1436	95.307	K	VQIVYKPVDLSKVTSKCGSLGNIHHKPGGGQ	VTSK(1)CGSLGNIHHKPGGGQVEVK	2.63083e+07	0	0	2.14959e+07	0	0	2.28754e+07	0	0	3.16364e+07	0	0	3.365e+07	0	0	2.66165e+07	0	0	0	0	0	2.92944e+06	0	0	2.89538e+06	0	0	4.38529e+06	0	0	5.83953e+06	0	0	4.11063e+06	0	0
P11881	1771	0.975304	16.2466	79.867	K	LTSFGNGPLSPGGPSKPGGGGGGPGSSSTSR	R(0.023)ESLTSFGNGPLSPGGPSK(0.975)PGGGGGGPGSSSTSR(0.002)	0	0	0	224661226	0	0	8.34335e+07	0	0	0	0	0	0	0	0	0	0	0	0	0	0	3.3945e+08	0	0	1.56344e+07	0	0	0	0	0	0	0	0	0	0	0
P13595	775	0.932608	11.4109	186.29	K	KDMEEGKAAFSKDESKEPIVEVRTEEERTPN	AAFSK(0.067)DESK(0.933)EPIVEVR	0	0	0	8.60987e+06	0	0	8.34782e+06	0	0	0	0	0	5.7385e+06	0	0	1.5851e+07	0	0	0	0	0	0	0	0	0	0	0	0	0	0	0	0	0	0	0	0
P14873	1491	1	89.3273	241.92	K	VETMSSQSALALDERKLGGDVSPTQIDVSQF	K(1)LGGDVSPTQIDVSQFGSFKEDTK	7.6588e+07	0	0	1.12257e+08	0	0	8.04076e+07	0	0	1.21765e+08	0	0	172521388	0	0	2.7334e+07	0	0	1.32931e+08	0	0	6.74509e+07	0	0	6.0738e+07	0	0	1.64322e+08	0	0	1.35035e+08	0	0	1.79115e+08	0	0
P14873	1250	1	207.809	207.81	K	ELDIKDVSDERLSPAKSPSLSPSPPSPIEKT	LSPAK(1)SPSLSPSPPSPIEK(1)	0	0	0	0	0	0	0	0	0	0	0	0	0	5.84539e+06	0	0	0	0	0	0	0	0	0	0	0	0	0	0	1.29132e+07	0	0	1.40896e+07	0	0	1.2102e+07	0
P14873	2269	0.578591	1.42602	148.85	K	VKKGDGKSKPLAASPKPGALKESSDKVSRVA	SK(0.417)PLAASPK(0.579)PGALK(0.005)	0	0	0	1.39169e+08	0	0	5.3545e+07	0	0	0	0	0	8.40127e+07	0	0	2.80585e+07	0	0	3.40299e+07	0	0	4.59231e+07	0	0	3.87501e+07	0	0	7.31912e+07	0	0	0	0	0	7.8758e+07	0	0
P14873	835	0.999898	38.4242	98.121	K	LEAERSLMSSPEDLTKDFEELKAEEIDVAKD	SLMSSPEDLTK(1)DFEELK(0.711)AEEIDVAK(0.289)	0	1.7615e+07	0	4.89726e+07	1.67358e+07	0	4.55251e+07	1.28642e+07	0	6.39718e+07	2.05306e+07	0	5.9908e+07	1.71958e+07	0	7.64918e+07	1.8668e+07	0	1.1999e+08	2.39707e+07	0	7.88937e+07	3.33095e+07	0	9.82542e+07	3.70168e+07	0	1.471e+08	2.61552e+07	0	8.42933e+07	2.82738e+07	0	7.57259e+07	2.31352e+07	0
P14873	1194	0.997502	28.8653	105.08	K	FNGLSEGSKTDATDGKDYNASASTISPPSSM	TDATDGK(0.998)DYNASASTISPPSSMEEDK(0.001)FSK(0.001)	1.16674e+07	0	0	1.55804e+07	0	0	2.16562e+07	0	0	0	0	0	3.14264e+07	0	0	1.51565e+07	0	0	1.25964e+07	0	0	1.10743e+07	0	0	9.9587e+06	0	0	1.6239e+07	0	0	1.92129e+07	0	0	1.73945e+07	0	0
P14873	1213	0.555256	0.968981	129.6	K	ASASTISPPSSMEEDKFSKSALRDAYCSEEK	TDATDGK(0.001)DYNASASTISPPSSMEEDK(0.555)FSK(0.444)	0	0	0	0	0	0	0	0	0	0	0	0	0	0	0	0	0	0	0	0	0	0	0	0	0	0	0	2.74726e+07	0	0	0	0	0	0	0	0
P14873	1910	0.99996	43.9742	160.18	K	HDVGGYYYEKTERTIKSPCDSGYSYETIEKT	TIK(1)SPCDSGYSYETIEK	0	0	0	1.32587e+07	0	0	7.20419e+06	0	0	1.70962e+07	0	0	9.40084e+06	0	0	1.69642e+07	0	0	0	0	0	0	0	0	0	0	0	7.66071e+06	0	0	0	0	0	8.61021e+06	0	0
P14873	1870	0.999893	39.7062	154.71	K	DSGGKTPGDFNYAYQKPENAAGSPDEEDYDY	TPGDFNYAYQK(1)PENAAGSPDEEDYDYESQEK	2.1106e+08	0	0	2.49037e+08	0	0	1.86833e+08	0	0	2.76577e+08	0	0	8.74153e+06	0	0	2.7295e+08	0	0	1.57617e+08	0	0	2.24429e+07	0	0	3.404e+08	0	0	3.86587e+08	0	0	3.68685e+08	0	0	8.79207e+07	0	0
P15105	11	0.615875	2.0502	102.07	K	_____MATSASSHLNKGIKQMYMSLPQGEKV	ATSASSH(0.384)LNK(0.616)GIK	1.61936e+07	0	0	1.70128e+07	0	0	3.04944e+07	0	0	5.91405e+07	0	0	1.90603e+07	0	0	0	0	0	2.82049e+07	0	0	2.90709e+07	0	0	2.36856e+07	0	0	4.37961e+07	0	0	1.23342e+07	0	0	1.55318e+07	0	0
P16054	726	1	103.137	113.53	K	LVDEAIIKQINQEEFKGFSYFGEDLMP____	QINQEEFK(1)GFSYFGEDLMP	1.29026e+07	0	0	0	0	0	1.99763e+07	0	0	1.96814e+07	0	0	1.63578e+07	0	0	1.27311e+07	0	0	0	0	0	4.06958e+07	0	0	0	0	0	3.85351e+07	0	0	1.35161e+07	0	0	1.80949e+07	0	0
P16546	1023	0.740913	4.56333	85.407	K	EVNDRQGFVPAAYVKKLDPAQSASRENLLEE	K(0.741)LDPAQSASR(0.259)ENLLEEQGSIALR	0	0	0	0	0	0	0	0	0	0	0	0	0	0	0	0	0	0	0	0	0	0	0	0	0	0	0	0	0	0	0	0	0	9.10008e+07	0	0
P18155	286	1	89.2595	89.26	K	VIDVGINRVQDPVTAKPKLVGDVDFEGVKKK	VQDPVTAK(1)PK(1)LVGDVDFEGVK(1)	0	0	0	0	0	0	0	0	0	0	0	0	0	0	0	0	0	0	0	0	0	0	0	0	0	0	0	0	0	0	0	0	0	0	0	0
P18155	288	1	89.2595	89.26	K	DVGINRVQDPVTAKPKLVGDVDFEGVKKKAG	VQDPVTAK(1)PK(1)LVGDVDFEGVK(1)	0	0	0	0	0	0	0	0	0	0	0	0	0	0	0	0	0	0	0	0	0	0	0	0	0	0	0	0	0	0	0	0	0	0	0	0
P18872	317	0.452745	0	66.593	K	AYIQTQFESKNRSPNKEIYCHMTCATDTNNI	NR(0.095)SPNK(0.453)EIYCH(0.453)MTCATDTNNIQVVFDAVTDIIIANNLR	0	0	0	0	0	0	0	0	0	0	0	0	0	0	0	0	0	0	0	0	0	0	0	0	0	0	0	0	0	0	0	0	0	0	0	0
P19246	828	0.998279	28.6358	225.86	K	AKSPVKEGAKPPEKAKPLDVKSPEAQTPVQE	AK(0.998)PLDVK(0.001)SPEAQTPVQEEAK	0	0	0	0	0	0	0	0	0	0	0	0	0	0	0	0	0	0	0	0	0	0	0	0	0	0	0	0	0	0	5.48167e+07	0	0	0	0	0
P19246	833	0.999948	42.8234	259.34	K	KEGAKPPEKAKPLDVKSPEAQTPVQEEAKHP	AKPLDVK(1)SPEAQTPVQEEAK	4.74807e+07	0	0	5.61564e+07	0	0	2.82951e+07	0	0	1.39169e+08	0	0	1.38234e+08	0	0	1.1538e+08	0	0	1.69645e+07	0	0	0	0	0	3.32551e+07	0	0	8.8389e+07	0	0	2.02928e+08	0	0	3.94873e+07	0	0
P19246	858	0.99307	21.5887	103.83	K	EEAKHPTDIRPPEQVKSPAKEKAKSPEKEEA	HPTDIRPPEQVK(0.993)SPAK(0.007)	8.43035e+07	0	0	1.5687e+08	0	0	8.6981e+07	0	0	3.20185e+08	0	0	2.70512e+08	0	0	3.38565e+08	0	0	5.94077e+07	0	0	6.20295e+07	0	0	1.11707e+07	0	0	2.46305e+08	0	0	4.45791e+08	0	0	3.39726e+08	0	0
P20357	1653	1	63.6283	253.97	K	LVPSEKKVAIIRTPPKSPATPKQLRLINQPL	VAIIRTPPK(1)SPATPK	2.25287e+08	0	0	3.42613e+08	0	0	3.03438e+08	0	0	1.4821e+08	0	0	1.83455e+08	0	0	1.84722e+08	0	0	3.30263e+07	0	0	177537611	0	0	184500540	0	0	4.30909e+07	0	0	1.00537e+08	0	0	1.20826e+08	0	0
P20357	905	0.999998	56.0974	67.917	K	NLSGESGSFYEGTDDKVRRDLATDLSLIEVK	YTVPLPSPVQDSENLSGESGSFYEGTDDK(1)VR	0	0	0	2.05918e+07	0	0	0	0	0	0	0	0	9.2817e+06	0	0	1.145e+07	0	0	0	0	0	0	0	0	1.42583e+07	0	0	1.16136e+07	0	0	0	0	0	1.64202e+07	0	0
P20444	105	0.487552	0	78.758	K	DKGPDTDDPRSKHKFKIHTYGSPTFCDHCGS	FK(0.488)IH(0.488)TYGSPTFCDH(0.025)CGSLLYGLIHQGMK	0	0	0	0	0	0	0	0	0	0	0	0	0	0	0	0	0	0	0	0	0	0	0	0	0	0	0	0	0	0	0	0	0	0	0	0
P20917	540	0.999976	46.1292	127.44	K	ILIAIVCYITQTRRKKNVTESSSFSGGDNPH	K(1)NVTESSSFSGGDNPHVLYSPEFR	0	0	0	7.19951e+06	0	0	0	0	0	2.0874e+07	0	0	1.83684e+07	0	0	1.74099e+07	0	0	0	0	0	0	0	0	0	0	0	2.43017e+07	0	0	0	0	0	2.33434e+07	0	0
P22682	663	1	89.4107	110.15	K	NSSPVAGPESEHPKIKPSSSANAIYSLAARP	IK(1)PSSSANAIYSLAAR	2.80168e+06	0	0	4.8309e+06	0	0	0	0	0	6.8403e+06	0	0	5.01294e+06	0	0	5.51327e+06	0	0	0	0	0	0	0	0	3.05911e+06	0	0	3.27372e+06	0	0	2.73972e+06	0	0	4.00407e+06	0	0
P26339	302	0.551273	0.89687	79.59	K	GDGKTEASEALPSEGKGELEHSQQEEDGEEA	TEASEALPSEGK(0.551)GELEH(0.448)SQQEEDGEEAMVGTPQGLFPQGGK	0	0	0	0	0	0	0	0	0	0	0	0	9.35433e+06	0	0	0	0	0	0	0	0	0	0	0	0	0	0	0	0	0	0	0	0	0	0	0
P26645	165	0.679388	3.26137	148.94	K	RFSFKKSFKLSGFSFKKSKKESGEGAEAEGA	LSGFSFK(0.679)K(0.321)	1.75375e+08	0	0	2.10944e+08	0	0	2.44517e+08	0	0	2.03546e+08	0	0	3.56654e+08	0	0	3.11703e+08	0	0	3.61331e+08	0	0	0	0	0	304726530	0	0	1.73753e+08	0	0	3.28392e+08	0	0	2.66773e+08	0	0
P27546	670	0.698652	3.66563	120.52	K	DITTPPNKEPPPSPEKKAKPLATTQPAKTST	AAVGVTGNDITTPPNK(0.001)EPPPSPEK(0.699)K(0.3)	1.80827e+07	0	0	0	0	0	2.11904e+07	0	0	44507561	0	0	3.95176e+07	0	0	4.891e+07	0	0	3.2329e+07	0	0	3.75556e+07	0	0	3.15917e+07	0	0	6.16351e+07	0	0	3.23827e+07	0	0	3.68329e+07	0	0
P27546	763	0.999981	49.8487	104.94	K	PITEAKVAEKRTSPSKPSSAPALKPGPKTTP	TSPSK(1)PSSAPALKPGPK	1.37662e+08	0	0	2.29641e+08	0	0	1.54853e+08	0	0	375838955	0	0	3.81525e+08	0	0	1.90538e+08	0	0	8.60223e+07	0	0	1.62207e+08	0	0	2.28912e+08	0	0	294177977	0	0	3.99265e+08	0	0	3.80487e+08	0	0
P27671	724	1	94.387	118.51	K	KLLYGDAPKSPRASRKFSSPPPLAIGTSSPS	K(1)FSSPPPLAIGTSSPSR	0	0	0	0	0	0	0	0	0	0	0	0	0	0	0	4.05988e+06	0	0	0	0	0	0	0	0	0	0	0	0	0	0	0	0	0	3.97698e+06	0	0
P28028	134	0.997097	25.359	129.88	K	SLVFQTPTDASRNNPKSPQKPIVRVFLPNKQ	NNPK(0.997)SPQK(0.003)PIVR	8.23037e+07	0	0	1.04461e+08	0	0	8.86504e+07	0	0	1.30119e+08	0	0	1.27961e+08	0	0	4.68075e+06	0	0	0	0	0	4.29074e+07	0	0	114402775	0	0	1.51212e+07	0	0	0	0	0	1.2458e+06	0	0
P28028	138	0.996508	24.5536	190.66	K	QTPTDASRNNPKSPQKPIVRVFLPNKQRTVV	NNPK(0.003)SPQK(0.997)PIVR	1.8125e+07	0	0	1.67467e+07	0	0	0	0	0	1.96316e+07	0	0	1.4987e+07	0	0	1.64436e+07	0	0	0	0	0	0	0	0	0	0	0	0	0	0	2.75231e+07	0	0	0	0	0
P28652	392	0.997724	26.4173	64.856	K	LEPQTTVIHNPVDGIKESSDSTNTTIEDEDA	GSLPPAALEPQTTVIH(1)NPVDGIK(0.998)ESSDSTNTTIEDEDAK(0.002)	0	0	0	0	1.22037e+07	0	0	2.12224e+07	0	0	0	0	0	0	0	0	0	0	0	0	0	0	1.59847e+07	0	0	5.74188e+07	0	0	0	0	0	0	0	0	0	0
P28661	332	0.976983	16.2784	159.26	K	IYQFPDCDSDEDEDFKLQDQALKESIPFAVI	IYQFPDCDSDEDEDFK(0.977)LQDQALK(0.023)	2.34047e+07	0	0	6.14774e+08	0	0	449974267	0	0	2.96729e+07	0	0	1099851388	0	0	1141006721	0	0	552813221	0	0	5.92113e+07	0	0	7.43808e+08	0	0	1096376315	0	0	1178601889	0	0	6.42964e+07	0	0
P28661	122	1	121.063	142.95	K	SPWGKLDPYDSSEDDKEYVGFATLPNQVHRK	LDPYDSSEDDK(1)EYVGFATLPNQVHR	532856838	0	0	3.33541e+08	0	0	4.53991e+08	0	0	7.59689e+08	0	0	1079696829	0	0	8.08898e+08	0	0	3.97165e+08	0	0	4.80215e+08	0	0	4.23714e+08	0	0	1221012954	0	0	8.82704e+08	0	0	9.8283e+08	0	0
P28867	639	0.995418	23.3693	255.39	K	SPSDYSNFDPEFLNEKPQLSFSDKNLIDSMD	SPSDYSNFDPEFLNEK(0.995)PQLSFSDK(0.005)	2.65387e+07	0	0	2.16686e+07	0	0	1.80364e+07	0	0	3.34841e+07	0	0	2.86358e+07	0	0	4.28412e+07	0	0	0	0	0	0	0	0	0	0	0	8.85382e+07	0	0	0	0	0	7.21746e+07	0	0
P35436	880	0.93646	11.7244	241.68	K	RGIYSCIHGVHIEEKKKSPDFNLTGSQSNML	K(0.936)K(0.063)SPDFNLTGSQSNMLK(0.001)	0	0	0	9.57232e+07	0	0	39509972	0	0	1.86623e+07	0	0	7.01958e+07	0	0	0	0	0	4.19445e+07	0	0	7.3427e+07	0	0	5.65545e+07	0	0	2.30993e+07	0	0	1.92278e+07	0	0	0	0	0
P35436	881	0.499995	0	134.82	K	GIYSCIHGVHIEEKKKSPDFNLTGSQSNMLK	K(0.5)K(0.5)SPDFNLTGSQSNMLK	0	0	0	8.45037e+07	0	0	0	0	0	0	0	0	7.4669e+07	0	0	6.89651e+07	0	0	0	0	0	0	0	0	9.68206e+07	0	0	0	0	0	0	0	0	0	0	0
P35585	14	0.493992	0	65.563	K	__MSASAVYVLDLKGKVLICRNYRGDVDMSE	MSASAVYVLDLK(0.012)GK(0.494)VLICR(0.494)	0	0	0	0	0	0	0	0	0	0	0	0	0	0	0	0	0	0	0	0	0	0	0	0	0	0	0	0	0	0	0	0	0	0	0	0
P39447	1369	0.837129	8.48461	85.441	K	YRKQLSYFDRRSFESKPSAHLPAGHHSEPAK	SFESK(0.837)PSAH(0.119)LPAGH(0.024)H(0.02)SEPAKPVHSQSQPNFSSYSSK	0	0	0	5.27656e+06	0	0	0	0	0	0	0	0	8.55059e+06	0	0	6.94387e+06	0	0	0	0	0	0	0	0	0	0	0	0	0	0	0	0	0	0	0	0
P40124	303	0.979967	16.9025	178.99	K	QSGPVRSGPKPFSAPKPQTSPSPKPATKKEP	SGPKPFSAPK(0.98)PQTSPSPK(0.02)	0	0	0	0	0	0	6.36978e+06	0	0	4.29939e+06	0	0	0	0	0	0	0	0	0	0	0	0	0	0	0	0	0	0	0	0	0	0	0	0	0	0
P42208	225	1	64.3307	184.21	K	IYHLPDAESDEDEDFKEQTRLLKASIPFSVV	IYHLPDAESDEDEDFK(1)EQTR	4.73375e+07	0	0	4.08825e+07	0	0	3.17144e+07	0	0	3.64523e+07	0	0	8.46655e+07	0	0	9.79789e+07	0	0	1.72266e+07	0	0	1.33017e+07	0	0	2.02225e+07	0	0	2.02437e+07	0	0	0	0	0	1.88053e+07	0	0
P43006	525	0.755759	6.29676	113.02	K	QEDIEMTKTQSIYDDKNHRESNSNQCVYAAH	TQSIYDDK(0.756)NH(0.177)R(0.066)ESNSNQCVYAAHNSVVIDECK	0	0	0	0	0	0	1.1782e+08	0	0	0	0	0	0	0	0	4.13483e+07	0	0	1.20943e+08	0	0	1.10613e+07	0	0	0	0	0	0	0	0	0	0	0	0	0	0
P46460	202	0.999906	40.2515	199.65	K	KAENSSLNLIGKAKTKENRQSIINPDWNFEK	TK(1)ENRQSIINPDWNFEK	3.58409e+06	0	0	0	0	0	0	0	0	0	0	0	5.41301e+06	0	0	2.80885e+06	0	0	0	0	0	0	0	0	0	0	0	0	0	0	0	0	0	5.29459e+06	0	0
P46660	438	0.992621	21.288	124.2	K	PSYLLPPRILSSTASKVSSAGLSLKKEEEEE	ILSSTASK(0.993)VSSAGLSLK(0.007)	1.15429e+07	0	0	0	0	0	6.81285e+06	0	0	4.63226e+07	0	0	0	0	0	3.46949e+07	0	0	1.54167e+07	0	0	1.38801e+07	0	0	2.83797e+07	0	0	2.97871e+07	0	0	2.9741e+07	0	0	2.70441e+07	0	0
P47809	86	0.999977	46.4294	205	K	IERLRTHSIESSGKLKISPEQHWDFTAEDLK	LK(1)ISPEQHWDFTAEDLKDLGEIGR	2.13468e+08	0	0	2.10018e+08	0	0	2.08394e+08	0	0	2.83764e+08	0	0	3.40938e+08	0	0	3.38774e+08	0	0	4.64805e+07	0	0	2.73816e+07	0	0	410592934	0	0	6.76525e+08	0	0	3.39072e+08	0	0	1.04002e+08	0	0
P47857	656	1	84.2995	169.64	K	FNLYSEEGKGIFDSRKNVLGHMQQGGSPTPF	K(1)NVLGHMQQGGSPTPFDR	1.94875e+07	0	0	2.00098e+07	0	0	1.80401e+07	0	0	2.30274e+07	0	0	1.8184e+07	0	0	1.82893e+07	0	0	2.61108e+07	0	0	0	0	0	2.77399e+07	0	0	2.06471e+07	0	0	2.88562e+07	0	0	0	0	0
P47867	364	0.999966	47.4157	122.94	K	NTTDSKSKLFPAPPEKSQEETDSTKEEAAKM	LFPAPPEK(1)SQEETDSTKEEAAK	0	0	0	0	0	0	0	0	0	0	0	0	0	0	0	0	0	0	0	0	0	0	0	0	0	0	0	0	0	0	0	0	0	0	0	0
P48722	578	1	108.132	123.67	K	DKQDRINQTIKKGKIKSIDLPIQSSLYRQLT	IK(1)SIDLPIQSSLYR	7.08169e+06	0	0	8.4496e+06	0	0	7.25286e+06	0	0	6.53361e+06	0	0	3.12502e+06	0	0	1.04647e+07	0	0	9.73013e+06	0	0	1.12299e+07	0	0	9.40126e+06	0	0	5.64679e+06	0	0	7.99289e+06	0	0	5.25636e+06	0	0
P51125	213	0.999366	34.697	116.85	K	VATALDKVVGKKKEQKPFTPASPVQSTPSKP	EQK(0.999)PFTPASPVQSTPSKPSDK	4.71077e+07	0	0	3.79796e+07	0	0	3.14118e+07	0	0	4.52571e+07	0	0	4.28696e+07	0	0	5.88721e+07	0	0	0	0	0	0	0	0	2.15998e+07	0	0	3.37449e+07	0	0	0	0	0	0	0	0
P51125	227	0.684419	3.64449	169.49	K	QKPFTPASPVQSTPSKPSDKSGMDAALDDLI	EQK(0.02)PFTPASPVQSTPSK(0.684)PSDK(0.296)	0	0	0	0	0	0	0	0	0	0	0	0	0	0	0	1.06416e+07	0	0	0	0	0	0	0	0	0	0	0	5.04739e+06	0	0	0	0	0	6.77627e+06	0	0
P52800	261	0.984163	18.3353	219.68	K	ITLVVLLLKYRRRHRKHSPQHTTTLSLSTLA	K(0.984)H(0.014)SPQHTTTLSLSTLATPK(0.001)	3.01965e+07	0	0	4.86217e+07	0	0	3.89622e+07	0	0	5.8087e+06	0	0	6.31254e+06	0	0	0	0	0	0	0	0	1.83417e+07	0	0	1.58548e+07	0	0	0	0	0	7.83873e+06	0	0	0	0	0
P54987	18	0.506213	0	60.735	K	LKSVTESFAGMIHGLKVNHLTDGIIRRSKRM	MLKSVTESFAGMIH(0.506)GLK(0.506)VNH(0.993)LTDGIIR(0.995)	0	0	0	0	0	0	0	0	0	0	0	0	0	0	0	0	0	0	0	0	0	0	0	0	0	0	0	0	0	0	0	0	0	0	0	0
[truncated: 1,372 more rows]

## Sheet: Quantified sites
Proteins	Position	Localization prob	Score diff	Score	Amino acid	Multiplicity	ANOVA Significant	-Log ANOVA p value	Sequence window	Phosphorylation(HKR) Probabilities	Normalized-intensity AD_Cor_1	Normalized-intensity AD_Cor_2	Normalized-intensity AD_Cor_3	Normalized-intensity AD_Others_1	Normalized-intensity AD_Others_2	Normalized-intensity AD_Others_3	Normalized-intensity WT_Cor_1	Normalized-intensity WT_Cor_2	Normalized-intensity WT_Cor_3	Normalized-intensity WT_Others_1	Normalized-intensity WT_Others_2	Normalized-intensity WT_Others_3	Average intensity AD_Cor	Average intensity WT_Cor	Average intensity AD_Others	Average intensity WT_Others	Ratio-AD/WT-Cor	Ratio-AD/WT-Others
[truncated: 499 more rows]
